# Supplementary material for: Abnormal oxidative metabolism in a quiet genomic background underlies clear cell papillary renal cell carcinoma
Source: eLife. 2019 Apr 1;8:e38986. doi: 10.7554/eLife.38986 (PMC6459676; doi:10.7554/eLife.38986)
Supplement: Figure 1—source data 1. [file elife-38986-fig1-data1.xlsx]

## Sheet: RC13
	1,2-propanediol	1,3-dihydroxyacetone	1,5-anhydroglucitol (1,5-AG)	1-arachidonoylglycerophosphocholine (20:4n6)*	1-arachidonoylglycerophosphoethanolamine*	1-arachidonoylglycerophosphoinositol*	1-arachidonylglycerol	1-dihomo-linoleoylglycerophosphocholine (20:2n6)*	1-eicosatrienoylglycerophosphocholine (20:3)*	1-eicosenoylglycerophosphoethanolamine (20:1n9)*	1-linoleoylglycerol (1-monolinolein)	1-linoleoylglycerophosphocholine (18:2n6)	1-linoleoylglycerophosphoethanolamine*	1-linoleoylglycerophosphoserine*	1-margaroylglycerophosphocholine (17:0)	1-margaroylglycerophosphoethanolamine*	1-myristoylglycerophosphocholine (14:0)	1-myristoylglycerophosphoethanolamine	1-oleoylglycerol (1-monoolein)	1-oleoylglycerophosphocholine (18:1)	1-oleoylglycerophosphoethanolamine	1-oleoylglycerophosphoinositol*	1-oleoylglycerophosphoserine	1-oleoylplasmenylethanolamine*	1-palmitoleoylglycerophosphocholine (16:1)*	1-palmitoylglycerol (1-monopalmitin)	1-palmitoylglycerophosphocholine (16:0)	1-palmitoylglycerophosphoethanolamine	1-palmitoylglycerophosphoinositol*	1-palmitoylplasmenylethanolamine*	1-stearoylglycerol (1-monostearin)	1-stearoylglycerophosphocholine (18:0)	1-stearoylglycerophosphoethanolamine	1-stearoylglycerophosphoglycerol	1-stearoylglycerophosphoinositol	1-stearoylplasmenylethanolamine*	10-heptadecenoate (17:1n7)	10-nonadecenoate (19:1n9)	13-HODE + 9-HODE	15-methylpalmitate (isobar with 2-methylpalmitate)	16-hydroxypalmitate	17-methylstearate	2'-deoxyguanosine	2'-deoxyinosine	2-aminoadipate	2-aminobutyrate	2-arachidonoyl glycerol	2-arachidonoylglycerophosphocholine*	2-arachidonoylglycerophosphoethanolamine*
DIAG-19432	1.19	1.93	2.13	0.56	0.49	0.26	0.45	0.46	0.27	0.2	0.1	1	0.22	0.07	0.57	0.13	0.22	0.23	0.21	0.65	0.62	0.12	0.12	0.42	0.26	0.25	0.98	0.77	0.42	0.46	0.24	1.13	0.42	0.38	0.26	0.05	0.24	0.23	0.26	0.59	1.38	0.55	0.32	0.27	3.82	0.99	0.66	0.34	0.54
DIAG-19433	0.69	0.93	1.14	0.32	0.33	0.26	1	0.59	0.12	0.04	0.54	1.24	0.12	0.07	0.97	0.09	0.22	0.23	0.72	0.72	0.32	0.93	0.18	1	0.72	0.62	1.07	0.87	1.23	0.79	0.53	1.8	0.26	0.2	0.92	1.21	0.53	0.81	0.83	0.73	0.54	0.69	0.32	0.27	1.94	1.27	1	0.14	0.38
DIAG-19434	0.89	0.87	1.41	0.25	0.15	0.17	0.19	0.67	0.16	0.05	0.1	0.59	0.07	0.07	0.14	0.09	0.22	0.23	0.18	0.26	0.11	0.07	0.05	0.08	0.92	0.16	0.4	0.17	0.09	0.08	0.31	0.6	0.09	0.22	0.09	0.05	0.28	0.15	0.47	0.39	0.82	0.28	0.32	0.27	1.99	0.8	0.19	0.14	0.13
DIAG-19435	0.88	0.51	0.31	0.05	0.11	0.11	0.08	0.16	0.12	0.04	0.1	0.17	0.39	0.07	0.14	0.09	0.22	0.23	0.12	0.05	0.05	0.07	0.03	0.03	0.26	0.06	0.13	0.03	0.14	0.03	0.17	0.04	0.03	0.13	0.07	0.05	0.07	0.08	0.25	0.32	0.59	0.12	0.32	0.27	0.5	0.24	0.19	0.14	0.12
DIAG-19436	2.3	0.93	2.84	0.27	0.19	0.16	0.33	1.17	0.13	0.04	0.1	1.21	0.08	0.07	0.14	0.09	0.54	0.23	0.16	0.5	0.27	0.19	0.1	0.33	0.79	0.26	0.89	1	0.35	0.26	0.34	1.34	0.19	0.23	0.2	0.5	0.28	0.37	0.41	0.63	1.3	0.44	0.32	0.6	3.74	1.01	0.19	0.15	0.15
DIAG-19437	0.6	2.34	1.25	0.18	0.17	0.11	0.26	0.16	0.12	0.04	0.1	0.51	0.09	0.07	0.14	0.09	0.22	0.23	0.13	0.36	0.09	0.07	0.03	0.16	0.53	0.11	0.46	0.05	0.08	0.09	0.24	0.6	0.05	0.13	0.08	0.05	0.08	0.09	0.3	0.28	0.78	0.16	0.32	0.32	2.87	1	0.19	0.15	0.16
DIAG-19438	0.81	1.02	0.99	0.46	0.43	0.2	1.49	0.16	0.12	0.04	0.65	1.07	0.1	0.07	0.14	0.09	0.33	0.23	0.87	0.38	0.13	0.15	0.15	0.1	0.59	0.73	0.74	0.56	0.24	0.13	0.57	0.71	0.15	0.23	0.24	0.38	0.62	0.61	0.37	0.69	1.32	0.62	0.32	0.27	1.9	0.66	1.19	0.23	0.36
DIAG-19439	0.77	0.51	3.73	0.41	0.36	0.55	0.29	0.16	0.34	0.04	0.25	0.88	0.1	0.15	0.14	0.09	0.22	0.23	0.28	0.53	0.14	0.44	0.13	0.14	1.48	0.21	0.93	0.6	0.28	0.09	0.34	2.48	0.26	0.28	0.41	0.29	0.49	0.35	0.53	0.72	1.63	0.69	0.32	0.27	0.18	0.61	0.19	0.19	0.37
DIAG-19440	1.93	0.64	2.54	0.38	0.2	0.15	0.29	0.16	0.12	0.04	0.31	1.53	0.12	0.07	0.42	0.09	0.22	0.23	0.18	0.42	0.15	0.09	0.07	0.18	0.71	0.16	0.75	0.08	0.19	0.16	0.24	1.6	0.09	0.13	0.16	0.05	0.38	0.35	0.88	0.39	1.79	0.25	0.32	0.27	5.23	1.05	0.19	0.18	0.17
DIAG-19441	0.88	5.59	0.35	1	0.36	1.11	0.73	0.16	0.32	0.04	0.78	0.36	0.12	0.07	0.14	0.09	0.22	0.23	0.61	0.64	0.21	0.53	0.25	0.46	0.26	0.37	0.63	0.33	0.48	0.44	0.71	0.14	0.22	0.16	0.37	0.59	0.7	0.72	0.77	0.63	0.79	0.35	0.32	0.83	4.16	1.03	0.8	0.14	0.7
DIAG-19442	0.93	0.53	0.99	0.14	0.1	0.11	0.21	0.16	0.12	0.04	0.1	0.34	0.07	0.07	0.14	0.09	0.22	0.23	0.12	0.15	0.13	0.11	0.04	0.12	0.72	0.15	0.21	0.28	0.08	0.08	0.33	0.18	0.09	0.16	0.06	0.1	0.09	0.08	0.27	0.27	0.72	0.12	0.32	0.39	4.16	0.7	0.19	0.14	0.11
DIAG-19443	0.86	1.75	0.58	0.65	0.95	0.77	0.6	0.16	0.9	0.34	1.06	0.41	0.38	0.26	0.14	0.19	0.22	0.23	0.66	0.39	0.54	0.49	0.43	0.55	0.26	0.85	0.72	0.59	0.29	0.4	0.83	0.39	0.62	0.13	0.34	0.11	2.07	2.3	2.87	1.76	1	1.75	0.32	0.67	0.57	1.41	0.97	0.39	1.27
DIAG-19444	1	0.98	0.7	2.97	4.88	3.11	4.6	1.4	6.84	3.98	2.77	14.67	6.85	1.9	1.37	7.11	1	0.23	3.51	5.41	21.02	3.75	3.53	4.23	2.4	4.57	5.52	33.02	3.8	6.27	3.5	2.81	15.26	3.1	4.28	15.54	1.83	1.83	2.01	2.46	1.76	1.5	2.27	3.51	0.57	1.19	4.32	2.51	3.16
DIAG-19445	1	0.87	1.67	1.37	0.66	0.81	0.89	0.16	1.02	1.19	1.35	0.49	0.99	1.85	0.14	0.43	0.22	0.23	1.65	1.41	1.93	1.26	0.94	4.13	0.26	1.12	0.91	0.93	0.7	1.4	0.96	0.07	1.81	0.97	0.79	0.15	7.86	7.42	4.65	4.6	1.21	2.65	0.32	0.78	11.8	2.34	0.8	1	1.4
DIAG-19446	1.07	1.69	2.13	1.27	1.64	1.66	1.28	0.37	1.45	0.91	0.1	4.41	1.59	0.66	0.55	1.36	0.61	0.23	1.05	3.22	7.98	2.08	1.83	3.27	3.11	1.27	2.51	6.29	1.79	2.25	1.56	2.28	4.45	1.03	2.05	4.4	1.56	1.7	4.64	1.56	0.89	1.1	1.41	1.25	1	0.98	1.83	1.02	1.44
DIAG-19447	1.34	1.47	0.83	1.85	1.34	1.74	3.08	0.16	1.72	2.1	2.7	0.94	1.26	1.89	0.64	1.12	0.22	0.23	3.29	1	3.38	1.71	1.44	3.38	0.26	2.27	1.68	5.51	1.28	1.54	2.15	0.93	3.29	4.34	1.37	2.09	3.63	5.32	19.77	2.62	1.35	2.2	0.9	1.37	0.78	0.84	3.02	1.24	1.31
DIAG-19448	1.06	1.19	0.91	2.15	2.65	2.18	2.2	2.29	2.78	8.29	1.11	8.88	6.38	1.07	3.79	11.18	1.44	0.61	1.27	5.55	28.34	3.1	2.31	11.06	5.48	2.02	7.48	48.7	4.01	11.97	3.62	8.6	24.14	7.97	4.76	12.06	1.27	1.29	1.21	1	1.28	0.83	1.81	2.05	0.89	0.73	0.48	1.27	1
DIAG-19449	4.44	1.85	0.81	2.99	1.42	2.35	1.34	0.16	4.2	1.09	1.47	0.28	1.37	3.9	0.14	0.49	0.22	0.23	1.47	2.39	2.14	2.76	3.6	2.76	0.74	1.47	1.68	1.84	1.74	1.96	1.73	0.03	1.99	2.74	1.25	7.94	9.23	10.16	7.98	6.97	0.58	4.25	3.74	4.03	8.87	1.2	0.97	2.69	1.9
DIAG-19450	2.12	0.81	0.96	1.21	1.22	1.44	1.63	1	1.11	3.85	0.94	5.82	4.83	0.76	1.03	10.04	1.26	1.07	1	3.82	25.92	2.31	1.57	7.79	5.62	1.99	7.3	53.48	4.16	11.84	4.35	7.03	20.4	7.38	4.65	31.43	0.82	0.77	1	0.67	0.56	0.53	0.59	1.08	0.43	0.59	0.94	0.76	0.76
DIAG-19451	0.66	0.51	1.46	9.69	3.29	2.73	2.53	0.16	4.8	0.86	0.84	0.82	1.48	1.88	0.14	0.25	0.22	0.23	1.4	3.74	2.5	0.07	3.68	1.71	1.02	3.14	2.17	1.36	1.81	1.02	4.07	0.12	1.61	0.93	1.99	3.59	4.47	10.28	3.42	3.29	1.14	5.67	2.01	2.63	0.65	1.32	3.59	6.7	2.74
DIAG-19452	1.07	0.51	1.23	2.82	2.12	1.51	1.1	0.61	2.43	3.84	0.42	3.65	3.53	0.86	1	6.39	0.69	0.47	0.61	3.14	17.52	2.09	1.21	5.83	2.99	1.11	3.78	31.01	3.5	6.77	1.62	1.71	16.3	1.75	3.62	0.63	1	0.82	0.71	0.99	0.36	0.5	0.74	1.3	0.65	0.82	1.21	1.27	2.04
DIAG-19453	0.65	0.87	1	0.64	1.3	0.83	1.23	0.16	0.45	0.41	0.79	0.25	0.59	0.29	0.14	0.44	0.51	0.23	1	0.59	1.66	0.62	1.08	0.46	0.26	2.75	1	2.48	0.58	0.49	1.82	0.38	1.34	1.69	0.5	1.45	2.37	3.55	11.08	2.12	0.85	2.17	0.32	0.74	0.18	0.56	0.62	0.34	0.89
DIAG-19454	1.35	0.8	1.18	1.86	1.84	2.12	4.84	3.13	2.19	9.65	2.08	14.14	6.7	1.08	5.95	23.47	4.29	1.26	1.71	10.24	37.51	5.71	6.43	18.46	12.94	3.14	16.4	72.97	10.38	23.89	0.17	14.41	37.82	11.45	9.81	31.62	1.52	1.65	3.97	1.06	1.15	1	0.53	1.01	0.48	0.9	2.83	1.19	1.06
DIAG-19455	1.06	1.2	0.5	0.66	0.46	0.89	0.51	0.16	0.78	0.58	1.4	1.91	1.22	1.53	0.14	0.21	0.22	0.23	1.55	1.23	1	1.07	1.05	0.98	0.91	0.84	0.9	0.81	0.78	1	1	0.13	0.97	1.17	1	2.48	3.47	3.11	2.12	2.9	0.91	2.01	1.13	1	7.14	3.06	0.43	1.68	1.44
DIAG-19456	1.48	1.02	0.44	0.99	1	1.72	0.66	1.43	0.83	8.72	1.56	3.53	7.14	0.66	2.11	15.57	1.17	1.24	1.3	3.65	24.46	1.89	0.95	6.39	4.16	2.15	6.62	61.81	5.48	11.54	4.91	6.44	22.44	3.45	6.76	0.79	0.99	0.64	0.99	0.97	1.25	1.05	0.39	0.63	1.18	1.53	0.19	0.75	1.01
DIAG-19457	0.77	6.18	1.13	1.95	1.25	0.93	0.96	0.16	0.68	0.27	1.59	0.23	0.42	0.56	0.14	0.25	0.22	0.23	1.48	0.58	0.67	0.39	0.2	0.31	0.26	1.47	0.84	1.05	0.83	0.36	2.7	0.15	1	1.06	1.04	0.05	0.81	1	5.14	0.98	0.71	0.78	2.94	4.02	0.71	1.4	1.47	0.62	0.81
DIAG-19458	0.79	1.05	0.91	1.49	1.31	2.47	1.46	0.16	0.98	0.72	0.71	0.67	1.01	0.26	0.14	1	0.22	0.23	0.66	2.06	2.87	2.24	1.1	1.43	0.26	0.64	1.96	2.51	2.38	1.91	1.05	0.25	2.67	0.49	2.97	0.55	1.29	1.21	3.96	1.57	1.76	1.28	1	1.34	1.44	1.97	1.95	1.14	1.54
DIAG-19459	0.98	0.89	1.09	0.76	0.79	0.63	0.34	0.16	0.49	0.04	0.1	0.81	0.22	0.07	0.32	0.09	0.22	0.23	0.12	0.67	0.31	0.42	0.17	0.53	0.83	0.3	0.91	0.18	0.24	0.39	0.44	1.68	0.38	0.19	0.44	0.07	0.75	0.98	0.71	1.05	0.71	1	0.32	0.47	0.46	0.77	0.2	0.31	0.78
DIAG-19460	1.22	1.58	1.16	2.98	2.63	2.28	1.76	2.79	2.53	7.79	0.55	6.17	8.29	1	3.35	17.8	1.36	0.93	0.45	4.29	30.24	2.68	2.1	9.58	5.29	1	6.36	59.79	5.04	12.15	2.55	8.48	27.88	4.45	5.5	2.84	1.61	1.33	0.87	1.75	0.74	1.18	0.49	0.86	0.59	0.96	0.19	1.33	1.98
DIAG-19461	1.32	0.55	0.22	2.21	1.03	1.32	2.18	0.16	3.03	0.29	6.92	5.42	1.22	3.93	0.14	0.24	0.22	0.23	4.12	1.48	0.68	0.91	1.29	1.98	1	3.05	1.09	0.61	1.17	2.05	2.79	1	0.86	0.59	1.49	0.57	2.96	2.78	1.7	2.77	1.11	1.53	1.74	1.36	11.1	1.73	3.16	2.19	2.43
DIAG-19462	0.92	0.82	0.32	2.34	2.07	1.07	5.81	2.21	1.17	9.02	1.82	9.9	8.68	1.12	3.61	16.98	2.1	1.82	1.91	5.95	28.77	2.02	2.06	9.95	6.86	2.52	7.68	62.13	3.73	14.38	3.65	8.69	32.71	4.68	3.89	3.36	1.17	1	1.5	1.1	1.2	1	0.73	0.62	0.85	1.41	3.57	1.17	1.54
[truncated: 464 more columns]

## Sheet: RC13Info
	x
DIAG-19432	CCPAP
DIAG-19433	CCPAP
DIAG-19434	CCPAP
DIAG-19435	CCPAP
DIAG-19436	CCPAP
DIAG-19437	CCPAP
DIAG-19438	mix ccPap/ccRCC
DIAG-19439	RAT
DIAG-19440	CCPAP
DIAG-19441	CCPAP
DIAG-19442	CCPAP
DIAG-19443	CCRCC
DIAG-19444	ccRCC normal
DIAG-19445	CCRCC
DIAG-19446	ccRCC normal
DIAG-19447	CCRCC
DIAG-19448	ccRCC normal
DIAG-19449	CCRCC tumor, high-sorbitol
DIAG-19450	CCRCC normal, high-sorbitol
DIAG-19451	CCRCC
DIAG-19452	ccRCC normal
DIAG-19453	CCRCC
DIAG-19454	ccRCC normal
DIAG-19455	CCRCC
DIAG-19456	ccRCC normal
DIAG-19457	CCRCC
DIAG-19458	ccRCC normal
DIAG-19459	CCRCC
DIAG-19460	ccRCC normal
DIAG-19461	CCRCC tumor, high-sorbitol
DIAG-19462	CCRCC normal, high-sorbitol

## Sheet: RC12
	Var.2	Var.3	3	5	7	9	23	27	29	31	33	37	45	53	55	57	59	61	63	65	69	71	73	75	79	81	83	85	87	91	93	95	97	105	109	113	123	133	137	143	147	155	159	161	165	171	175	181	183
1,2-propanediol	Lipid	Ketone bodies	0.71092	0.413386	0.573787	0.620129	0.545954	1.84377	0.59719	0.212497	0.850213	0.690277	1.26385	1.41332	0.778807	3.29303	1.0908	1.11518	1.68147	1.19112	1.33112	0.609051	1.43449	0.752401	0.603897	0.455883	1.915	1.71821	0.985354	4.46168	1.12224	0.739585	0.903892	1.7166	0.418644	0.807689	0.831694	1.19463	0.540939	0.591888	0.735392	0.888002	0.835396	0.901772	0.769555	1.16334	0.736887	1.13353	0.954851
1,3-dihydroxyacetone	Carbohydrate	Glycolysis, gluconeogenesis, pyruvate metabolism	0.809182	0.276412	0.646791	0.276412	0.276412	0.276412	0.650074	0.276412	0.581232	0.276412	1.51979	1.29004	1.10027	0.276412	0.276412	0.276412	1.12022	0.276412	6.21231	0.900217	1.21189	1.24358	0.276412	0.276412	1.51874	0.276412	0.747805	1.71229	0.276412	0.787461	0.766488	0.276412	0.276412	0.276412	0.276412	0.276412	0.848445	0.276412	1.06003	0.369089	0.276412	0.276412	1.12714	0.276412	0.276412	0.276412	0.276412
1,5-anhydroglucitol (1,5-AG)	Carbohydrate	Glycolysis, gluconeogenesis, pyruvate metabolism	0.705814	0.680312	0.233799	1.48114	1.02347	1.46632	0.736405	0.912196	0.746388	1.07248	1.17573	1.62925	0.775058	0.904828	0.65081	2.06962	0.843393	0.270343	1.24539	0.833526	1.27199	1.33559	2.54901	1.01604	0.769098	0.69049	1	1.11108	1.62308	0.965825	1.00559	1.67734	0.952202	0.393947	1.11563	0.883728	0.08579	1.41911	1.32017	1.52	1.73564	0.793894	1.08834	1.00097	0.625671	1.2249	1.2926
10-heptadecenoate (17:1n7)	Lipid	Long chain fatty acid	2.46408	0.913976	1.38893	0.824199	1.37343	1.46732	2.04913	0.977966	2.18	1.47317	2.61769	0.999315	1.73009	0.793788	0.901517	1.05612	1.58032	0.76178	1.38366	1.83624	0.676841	2.49381	1.0497	3.81189	1.60925	2.53951	2.20528	2.49048	1.55106	1.02801	1.30449	2.68093	1.14162	0.790807	1.63023	2.92065	0.845203	2.42919	1.75244	0.987062	0.44699	2.90828	0.972822	0.993493	1.43976	1.42524	1.91766
10-nonadecenoate (19:1n9)	Lipid	Long chain fatty acid	2.79587	0.764796	1.6652	1.04774	1.29545	1.67846	2.35123	0.816495	3.17497	2.04563	3.00638	1.84096	2.37423	0.956041	1.12428	1.30217	1.38806	0.716974	2.46166	3.24235	0.997341	3.26167	0.951285	6.55599	2.15795	3.18995	3.50122	3.5314	4.62066	1.24694	1.4866	3.24274	1.11744	0.774928	1.6989	1.52653	0.623145	3.65151	1.68396	1.08487	0.490932	2.91944	0.814069	1.08782	1.64364	1.48082	2.77435
13-HODE + 9-HODE	Lipid	Fatty acid, monohydroxy	5.63897	0.626037	0.932488	0.870949	1.82297	1.0672	1.49638	0.602706	1.43515	2.52245	4.13478	1.61335	1.33804	2.0376	0.638812	0.585461	0.567165	0.77946	1.77152	4.13514	1.1735	5.41431	2.28577	3.3165	1.23596	1.32994	14.9405	4.84904	1.48934	6.84123	1.72815	2.61394	0.678661	0.264909	2.39425	1.14517	0.86636	1.04573	0.888139	0.609923	0.13687	0.888025	0.54606	1.13804	0.726533	0.931002	0.978292
15-methylpalmitate (isobar with 2-methylpalmitate)	Lipid	Fatty acid, branched	1.14109	0.959834	1.29796	0.966778	1.02716	1.523	1.45536	0.997289	1.83432	1.19982	1.45587	1.61896	1.41804	0.742734	1.19557	1.05285	1.00622	1.01917	0.924354	1.19476	0.921824	2.19569	0.632066	2.77861	1.14901	1.56429	1.30966	1.37129	1.15287	1.01873	1.33468	1.36603	1.30292	0.915857	1.68156	1.18247	0.881821	1.58362	1.67682	1.30014	0.726719	2.27212	0.821336	1.04928	1.22065	1.02637	1.5051
16-hydroxypalmitate	Lipid	Fatty acid, monohydroxy	0.888181	1.16031	0.596799	1.23363	0.942612	1.33383	0.779657	1.53049	0.944279	0.482925	1.43161	1.208	1.29482	0.97874	1.01958	1.36056	0.639556	1.0764	0.25322	0.959822	0.846772	1.24982	0.518025	0.457806	0.931646	1.23228	1.12381	1.20419	1.0367	1.01341	1.18111	0.863728	0.974992	0.577433	0.96058	0.540578	0.394417	1.34494	0.98659	0.72601	1.03866	0.669531	0.958339	1.69985	0.873759	1.43916	0.892091
1-arachidonoylglycerophosphocholine*	Lipid	Lysolipid	0.756445	0.553711	0.154333	0.765972	1.65183	0.28602	0.216477	0.479946	0.984543	0.712532	0.265316	0.6462	0.669847	0.888113	1.0324	0.236875	2.21682	1.66264	0.779692	0.13261	1.57305	2.9093	0.845633	0.407296	0.578568	0.934161	0.682466	0.669841	5.04765	0.189546	0.384891	0.260174	0.341154	6.60971	1.46274	2.15939	0.25254	1.56609	1.72935	1.6512	2.24915	0.67569	0.962777	1	0.804671	0.692778	0.309948
1-arachidonoylglycerophosphoethanolamine*	Lipid	Lysolipid	0.755437	0.614146	0.288246	0.570727	0.390131	0.64669	0.338933	0.390629	0.990008	0.803478	1.18402	0.373641	0.73601	0.417619	0.601742	0.291922	1.38653	0.491748	0.727093	0.700424	0.648527	1.7206	0.144993	1.7576	0.644608	0.409908	0.8592	0.912388	1.15892	0.483324	0.740158	0.570016	0.468332	1.01433	0.568298	1.66908	0.769987	0.677884	0.55746	0.77853	0.404435	1.55273	0.852858	0.361456	0.95436	0.501092	0.627743
1-arachidonoylglycerophosphoinositol*	Lipid	Lysolipid	0.641515	0.111702	0.230738	0.380189	0.382792	0.843112	1.01526	0.383733	1.47132	0.56411	0.884966	0.85053	0.546316	0.591152	0.572596	0.699675	1.1087	0.305753	1.30642	0.343572	1.08294	1.02623	0.169305	1.80956	0.795447	0.962152	1.43528	0.895406	1.04232	0.549478	0.289575	0.46801	0.466546	0.875046	0.886268	0.960468	0.406409	0.630808	0.997925	0.73961	0.287139	1.77926	0.98474	0.361712	1.55091	0.583156	0.864898
1-arachidonylglycerol	Lipid	Monoacylglycerol	0.306128	0.306128	0.306128	0.306128	0.306128	0.306128	0.306128	0.306128	0.306128	0.991794	1.21766	0.306128	0.782388	0.306128	0.306128	0.306128	0.306128	0.306128	0.306128	1.27367	0.306128	0.306128	0.306128	0.995098	0.381325	0.306128	0.306128	1.28515	0.306128	0.306128	0.306128	0.306128	0.306128	1.26376	1.08874	0.306128	0.895105	0.306128	0.306128	0.306128	0.306128	0.306128	0.871277	0.306128	0.306128	0.98205	0.306128
1-docosahexaenoylglycerophosphocholine*	Lipid	Lysolipid	0.244294	0.244294	0.244294	0.389563	0.547457	0.361279	0.499277	0.529262	1.23294	0.244294	0.244294	0.244294	0.244294	0.244294	0.998727	0.244294	1.236	1.41175	0.244294	0.244294	0.244294	1.25838	0.244294	0.244294	0.244294	0.244294	0.244294	0.244294	1.56934	0.244294	0.660648	0.244294	0.551367	4.44049	0.91645	0.851876	0.244294	0.910388	0.923478	1.06759	1.6585	0.244294	0.946291	1.63028	0.835596	0.244294	0.244294
1-heptadecanoylglycerophosphocholine	Lipid	Lysolipid	0.639691	0.40208	0.400428	0.929755	0.872073	0.181294	0.181294	0.483131	0.419023	0.181294	0.317369	0.773131	0.378307	0.387923	0.817635	0.308175	0.852786	0.74956	0.22408	0.181294	0.181294	1.08433	0.181294	0.293361	0.630298	0.439498	0.709233	0.181294	1.35377	0.181294	0.181294	0.181294	0.65016	1.74463	1.09272	1	0.181294	0.658999	0.534104	1.00018	1.78862	0.181294	0.272081	1.29446	0.818589	0.479453	0.181294
1-heptadecanoylglycerophosphoethanolamine*	Lipid	Lysolipid	0.016373	0.016373	0.016373	0.224622	0.016373	0.142543	0.159181	0.016373	0.016373	0.016373	0.173456	0.016373	0.016373	0.016373	0.016373	0.016373	0.205116	0.016373	0.094824	0.016373	0.016373	0.220859	0.016373	0.219095	0.162699	0.232491	0.016373	0.016373	0.016373	0.167918	0.188249	0.016373	0.016373	0.195291	0.016373	0.504261	0.016373	0.139787	0.137609	0.016373	0.016373	0.152408	0.167192	0.016373	0.055417	0.016373	0.016373
1-linoleoylglycerol (1-monolinolein)	Lipid	Monoacylglycerol	0.388364	0.15877	0.603559	0.224346	0.573974	1.04649	0.846943	0.117585	1.59482	1.47984	9.89568	1.27499	2.97242	0.469609	0.693766	0.117585	0.924719	0.117585	0.826369	2.25447	0.812522	6.69654	0.117585	6.25345	0.811295	2.58682	2.33073	1.35155	0.798501	0.486086	0.986434	1.3166	1.13145	0.990758	1.09676	1.8855	1.27597	2.38776	1.71346	0.731794	0.639095	4.63495	4.2466	1.801	1.6053	2.75335	3.51437
1-linoleoylglycerophosphocholine	Lipid	Lysolipid	1.29072	0.414295	0.300842	0.774833	1.22274	0.529398	0.34326	0.34616	1.11657	0.575553	0.203737	0.685543	0.72106	0.887881	0.929102	0.21274	1.64849	1.70019	0.481388	0.18173	1.62631	5.80251	1.25562	0.727409	0.539936	1.58823	0.484802	0.627789	1.69173	0.08758	0.465143	0.286292	0.725642	5.0054	0.913427	1.0662	0.234417	1.73446	1.17195	1.68645	1.27523	1.61493	0.531363	1.17284	1.47613	0.710886	0.79433
1-linoleoylglycerophosphoethanolamine*	Lipid	Lysolipid	0.56575	0.35454	0.342232	0.527258	0.384317	0.70139	0.365203	0.224716	0.438162	0.299124	0.963097	0.564038	0.380267	0.397537	0.209622	0.21797	1.01925	0.205939	0.525253	0.491809	0.575486	1.9972	0.242959	1.38097	0.512763	0.641518	0.375781	0.581219	0.62144	0.475191	0.551533	0.862496	0.491851	1.20772	0.354513	1.79648	0.393905	0.525487	0.303356	0.476233	0.15378	2.18968	0.710259	0.306287	0.777218	0.365917	0.634671
1-methylimidazoleacetate	Amino acid	Histidine metabolism	0.722318	0.488171	0.781584	0.390094	2.2328	1.28025	1.0935	1.19885	3.59002	0.218074	0.750284	2.05807	0.218074	1.32237	0.412067	2.06966	0.218074	0.644693	0.840838	1.82746	0.687452	0.340291	0.753565	1.01591	0.574808	1.46111	1.75767	0.833124	0.218074	0.585528	0.456012	0.679196	0.495679	0.218074	0.848805	0.218074	0.578895	0.86666	0.941592	0.425958	0.508252	0.984091	0.218074	0.942254	0.218074	1.29377	0.605992
1-myristoylglycerophosphocholine	Lipid	Lysolipid	1.10547	0.213871	0.213871	0.909576	1.07333	0.267789	0.213871	0.304219	0.556085	0.706866	0.213871	0.61794	0.213871	0.775723	1.06121	0.397904	1.25938	1.13939	0.401184	0.213871	0.213871	0.642577	0.42545	0.404503	0.624517	1.23786	0.53449	0.372993	1.86017	0.213871	0.729945	0.451369	0.693543	2.624	0.826955	1.34071	0.213871	1.3081	1.10353	2.01046	1.10235	0.66813	0.604918	0.459665	0.488185	0.456504	0.213871
1-myristoylglycerophosphoethanolamine	Lipid	Lysolipid	0.14445	0.14445	0.14445	0.14445	0.14445	0.14445	0.14445	0.14445	0.14445	0.14445	0.14445	0.14445	0.14445	0.14445	0.14445	0.14445	0.14445	0.14445	0.14445	0.14445	0.14445	0.14445	0.14445	0.14445	0.14445	0.14445	0.14445	0.14445	0.14445	0.14445	0.14445	0.14445	0.14445	0.14445	0.14445	0.14445	0.14445	0.14445	0.14445	0.14445	0.14445	0.14445	0.14445	0.14445	0.14445	0.14445	0.14445
1-oleoylglycerol (1-monoolein)	Lipid	Monoacylglycerol	0.506592	0.451669	0.29984	0.507662	0.712781	0.888972	0.982864	0.513574	1.48136	1.1406	8.92457	1.38375	4.76197	0.60484	0.678697	0.549535	1.69051	0.283293	0.92736	2.59605	0.522974	3.39286	1.64121	8.22089	0.766057	1.59693	2.33692	1.64856	1.03758	0.618325	1.37237	1.3731	1.02685	1.47844	2.04263	2.36954	1.18219	2.60736	1.38323	1.67341	0.570209	5.01077	1.78468	1.61967	1.08088	2.45345	2.66113
1-oleoylglycerophosphocholine	Lipid	Lysolipid	0.599428	0.457289	0.391114	1.16972	1.25388	0.316892	0.235947	0.360541	0.647282	0.30616	0.185166	0.808781	0.388606	0.844705	0.907476	0.235748	1.39711	1.055	0.283798	0.198247	0.752639	0.993069	0.588675	0.235211	0.434248	0.566185	0.390491	0.147846	1.27127	0.114513	0.374118	0.114475	0.594701	3.02069	0.94968	1.77259	0.102823	1.00268	1.08195	1.04174	1.85096	0.533629	0.315225	0.890944	0.801359	0.3611	0.150589
1-oleoylglycerophosphoethanolamine	Lipid	Lysolipid	0.285743	0.085363	0.274418	1.164	0.509585	0.298747	0.496162	0.391549	0.280856	0.140881	0.713401	0.350205	0.282097	0.397567	0.164184	0.263573	1.19541	0.111947	0.189822	0.307428	0.218374	0.836	0.460357	0.812663	0.325195	0.698033	0.262525	0.325456	0.294089	0.285701	0.430581	0.563837	0.418543	0.863442	0.456513	3.3608	0.163522	0.292033	0.20089	0.376241	0.296525	0.935522	0.430526	0.330469	0.261839	0.118656	0.210364
1-oleoylglycerophosphoinositol*	Lipid	Lysolipid	1.05111	0.252929	0.475624	0.778022	0.186961	0.627619	0.804075	0.686874	0.728826	0.663784	1.91472	0.703246	0.469932	0.109535	0.399009	0.752886	0.966749	0.388901	0.548947	0.773527	0.501635	1.272	0.109535	1.46072	0.401896	1.0258	0.774768	0.109535	0.698591	0.443887	0.361139	0.774967	0.619511	0.735058	0.761205	2.66869	0.463093	0.336832	0.748509	0.455473	1	1.14405	0.727629	0.34135	1.51731	1.01826	0.896406
1-oleoylglycerophosphoserine	Lipid	Lysolipid	0.921167	0.276628	0.782426	1.08765	0.302996	0.892374	0.874533	0.865019	1.7434	1.03965	1.00342	1.20047	1.0416	0.757099	0.291564	0.677585	0.817473	0.264749	0.692479	0.406333	0.483336	0.870503	0.152506	0.050196	0.800563	0.783876	1.00986	1.66322	1.25726	0.729188	0.765741	1.42501	0.337771	1.27082	0.641783	1.64125	0.450699	0.63312	1.02144	0.417595	0.213675	1.76642	0.396924	0.292077	0.493052	0.555593	1.00034
1-palmitoleoylglycerophosphocholine*	Lipid	Lysolipid	1.58104	0.392056	0.149388	0.925745	1.12437	0.37482	0.149388	0.244478	1.21315	0.397618	0.474077	0.351624	0.343969	0.414071	1	0.261857	2.57758	1	0.709251	0.248848	0.606248	1.48395	1.0009	0.534433	0.555323	0.973221	0.565627	0.303814	2.61301	0.149388	0.749538	0.47534	0.591061	4.13664	0.791987	3.82	0.253403	1.36792	1.02451	1.43234	1.19997	1.36672	0.590662	0.523271	0.921866	0.149388	0.149388
1-palmitoleoylglycerophosphoethanolamine*	Lipid	Lysolipid	0.10428	0.10428	0.10428	0.10428	0.405927	0.10428	0.10428	0.10428	0.10428	0.10428	0.10428	0.10428	0.10428	0.10428	0.10428	0.10428	0.10428	0.10428	0.10428	0.10428	0.10428	0.10428	0.10428	0.10428	0.10428	0.10428	0.10428	0.10428	0.10428	0.10428	0.10428	0.10428	0.10428	0.10428	0.10428	0.599243	0.10428	0.171854	0.10428	0.10428	0.10428	0.10428	0.10428	0.10428	0.10428	0.10428	0.10428
1-palmitoylglycerol (1-monopalmitin)	Lipid	Monoacylglycerol	0.339175	0.259643	0.386069	0.469031	0.542724	0.921096	0.502849	0.335624	1.1864	1.01946	2.37655	1.64044	2.64947	0.49963	0.674545	0.452114	1.69101	0.256507	0.668527	0.890639	0.483668	3.3062	0.659221	3.18262	0.523698	0.999014	1.44862	1.46838	1.97993	1.02553	1.1079	1.48195	0.589582	1.29003	1.26101	1.26181	0.39595	1.15586	0.82354	0.733305	0.23263	2.2463	1.16081	1.0031	0.77231	1.34074	1.05631
1-palmitoylglycerophosphocholine	Lipid	Lysolipid	0.706308	1.52386	0.386324	1.61338	1.99083	0.50148	0.289742	0.478929	0.627392	0.465072	0.16426	0.815341	0.631937	0.395534	1.80978	0.28596	1.25259	1.675	0.130818	0.266876	0.632236	0.777401	0.382626	0.193393	0.452348	0.477676	0.551352	0.110732	1.01299	0.154469	0.772723	0.105546	0.907638	2.26819	0.860932	0.960481	0.166783	1.59538	1.09732	1.42645	3.14108	0.282803	0.18799	1.34767	0.64836	0.375508	0.119487
1-palmitoylglycerophosphoethanolamine	Lipid	Lysolipid	0.277608	0.118692	0.224734	1.54707	0.450781	0.537719	0.481525	0.419944	0.354033	0.075023	0.37786	0.27612	0.239007	0.718677	0.374166	0.16677	1.23836	0.121244	0.175466	0.221915	0.327302	0.981867	0.27405	0.536216	0.358839	0.655248	0.334946	0.361264	0.111832	0.320111	0.729416	0.479844	0.326894	0.791115	0.56873	2.63577	0.175267	0.265893	0.242104	0.189251	0.35889	0.604296	0.936984	0.403339	0.128532	0.119022	0.129541
1-palmitoylglycerophosphoinositol*	Lipid	Lysolipid	0.520168	0.111409	0.3239	0.803235	0.394748	0.673207	0.924104	0.367734	0.548535	0.272321	1	0.51268	0.491588	0.264996	0.433578	0.526758	1.29046	0.340048	0.409952	0.463767	0.310644	1	0.268864	0.111409	0.388923	0.442599	0.926069	0.82205	0.83705	0.111409	0.262883	1.0943	0.334922	0.892904	0.482314	1.77565	0.273138	0.237198	0.684043	0.33459	0.641407	1	0.455153	0.312672	0.547301	0.259631	0.367856
1-palmitoylplasmenylethanolamine*	Lipid	Lysolipid	0.633875	0.143324	0.703174	0.845594	0.161714	0.336021	0.473392	0.21979	1.09968	0.331984	1.21359	0.417381	0.298702	0.242792	0.13417	0.154931	2.21738	0.48724	0.438743	0.254045	0.610293	1.40672	0.163003	1.6303	0.984887	0.362231	0.479471	0.717846	0.243846	0.239147	0.244422	0.911058	0.452819	0.748941	0.372644	0.900316	0.366692	0.461508	0.62181	0.263697	0.376537	1.73371	1.01511	0.428244	0.236256	0.322827	0.822272
1-pentadecanoylglycerophosphocholine*	Lipid	Lysolipid	0.824862	0.187301	0.187301	0.616119	0.187301	1	0.362295	0.187301	0.453741	0.404394	0.187301	0.394862	0.187301	0.553555	0.385805	0.187301	1.41575	1.03665	0.187301	0.187301	0.187301	0.975254	0.510864	0.187301	0.187301	0.187301	0.36505	0.187301	0.674233	0.187301	0.35421	0.187301	0.536761	1.33638	0.882129	1.0855	0.187301	1.20708	0.187301	1.03184	1.08072	0.187301	0.187301	0.717251	0.339963	0.891843	0.187301
1-stearoylglycerol (1-monostearin)	Lipid	Monoacylglycerol	0.4934	0.68863	1.0619	1.03407	0.514392	1.08356	0.874972	0.772758	2.57991	0.875967	2.3627	1.32032	1.33897	0.593071	0.859166	0.973257	2.11134	0.607413	1.26115	1.15715	0.416615	3.52397	0.615893	2.28847	0.787006	0.836444	1.54884	1.11176	2.49164	0.673364	0.683495	1.66397	0.536291	1.09855	1.11631	1.16475	0.743225	1.09604	0.876486	0.616104	0.582357	0.901923	0.729327	0.818788	0.653508	0.583046	0.732351
1-stearoylglycerophosphocholine	Lipid	Lysolipid	1.20216	1.59454	0.451844	1.77232	2.53294	0.529452	0.41776	0.567968	0.637288	0.526234	0.067677	0.890302	0.845756	0.332244	2.3318	0.43527	1.03623	1.40807	0.385988	0.320498	0.604385	2.00495	0.302466	0.209689	0.537763	0.636055	0.495109	0.102174	1.78505	0.235262	0.738041	0.03648	0.718758	4.09644	1.13847	1.09298	0.229594	2.96391	1.71037	1.75257	3.7922	0.241492	0.180103	1.62917	0.776318	0.65778	0.106062
1-stearoylglycerophosphoethanolamine	Lipid	Lysolipid	0.178698	0.778029	0.200923	2.97261	0.318053	0.658241	0.256764	0.196804	0.54057	0.199991	0.36839	0.475383	0.245768	0.04847	0.937599	0.051151	0.882142	0.805116	0.077382	0.217705	0.334262	2.48703	0.04847	0.216109	0.191918	0.348752	0.506628	0.060913	0.732223	0.291387	0.593965	0.04847	0.774534	1.30706	0.609423	3.65625	0.04847	1.311	0.441393	0.558321	0.23339	0.220506	0.158616	1.1046	0.66902	0.23768	0.120085
1-stearoylglycerophosphoinositol	Lipid	Lysolipid	0.607688	0.214801	0.252425	0.711264	0.354656	0.267099	0.595601	0.343874	0.622062	0.202401	1.10875	0.341816	0.377822	0.187006	0.199493	0.430784	1.08919	0.318882	0.402102	0.417275	0.165293	0.534649	0.224817	1.03033	0.539289	0.368613	0.813636	0.664941	1.14525	0.395254	0.332869	0.968068	0.475501	0.795871	0.868616	1.54639	0.485878	0.447564	0.528257	0.43457	0.336709	0.665678	1.36503	0.373272	0.415993	0.251364	0.459294
2-aminoadipate	Amino acid	Lysine metabolism	3.57406	0.652404	1.03137	1.99573	1.10268	2.19411	6.63131	2.04501	4.45697	0.834072	0.668144	5.15011	2.34999	1.29045	0.284057	0.990123	0.514783	3.78727	2.09987	0.647192	9.72062	6.0387	11.2178	1.7175	1.44711	7.94317	0.915902	13.2666	0.760702	0.238092	0.615972	6.09452	3.44852	1.02633	1.32587	1.02996	1.2722	7.12817	1.29327	4.47409	2.241	16.4432	0.601083	14.7848	5.94204	4.30757	27.6611
2-aminobutyrate	Amino acid	Butanoate metabolism	0.994211	0.539472	0.655334	0.64184	1.39336	1.8478	1.4476	1.21446	1.75327	2.15772	1.14329	2.06308	1.03276	2.31238	0.567023	2.23386	1.15094	0.896184	1.6208	0.978298	1.06845	1.52747	1.96098	1.38249	0.816033	2.44617	0.771856	1.00579	1.29248	0.416261	0.908973	2.60823	1.52396	1.42401	0.933033	1.0294	0.488761	1.00983	2.61184	0.888872	0.879257	1.97332	0.983772	1.3541	3.63636	1.50505	1.05457
2-arachidonoylglycerophosphocholine*	Lipid	Lysolipid	1.68397	0.471122	0.631042	0.563977	1.76976	0.794951	0.247543	0.14921	1.90275	1.34392	0.416147	0.520727	0.271355	0.556195	0.553103	0.477269	3.34666	1.00589	1.96825	0.600027	1.11767	1.92128	0.387993	0.375523	1.03835	0.506508	0.977264	0.241906	7.00398	0.069065	0.238188	0.178934	0.643709	9.88569	1.33393	2.31401	0.105588	2.48741	4.92098	1.35859	1.61243	0.519252	0.856269	2.47985	1.76354	0.733902	0.307682
2-arachidonoylglycerophosphoethanolamine*	Lipid	Lysolipid	1.51903	0.428972	0.452115	0.39103	0.429299	0.830479	0.49776	0.369988	0.840595	0.812541	1.55348	0.525544	0.503455	0.530533	0.746235	0.43717	2.1115	0.576578	1.63784	0.763075	0.632032	0.984741	0.124596	2.29092	0.68608	0.36785	0.825699	1.25749	1.70882	0.439947	0.66692	0.399284	0.620652	1.09649	0.679547	2.22228	0.78294	0.769245	1.00802	0.609502	0.63499	2.61274	1.21048	0.487928	1.47015	0.82012	1.48952
2'-deoxyadenosine 3'-monophosphate	Nucleotide	Purine metabolism, adenine containing	1.06923	0.189173	1.87313	0.189173	0.642524	1.19464	0.971667	0.571994	1.1697	0.189173	0.972787	0.662819	0.700221	0.401275	0.189173	1.29247	0.189173	0.888544	1.01792	0.189173	1.00204	0.838371	0.189173	2.1689	1.24411	1.16016	0.833861	3.58435	1.61159	0.189173	0.189173	1.03442	0.189173	0.953872	0.895029	1.44838	0.189173	0.608766	0.706022	0.467426	1	1.55677	0.189173	1.33534	0.348845	0.189173	1.03475
2'-deoxycytidine 3'-monophosphate	Nucleotide	Pyrimidine metabolism, cytidine containing	0.281413	0.281413	0.281413	0.281413	0.281413	0.281413	0.281413	1	0.281413	0.281413	0.281413	0.281413	0.281413	0.281413	0.281413	0.281413	0.281413	0.281413	0.281413	0.281413	0.281413	0.281413	0.281413	0.281413	0.281413	0.281413	0.281413	0.281413	0.281413	0.281413	0.281413	0.281413	0.281413	0.281413	0.281413	0.281413	0.281413	0.281413	0.281413	0.281413	0.281413	0.281413	0.281413	0.281413	0.281413	0.281413	0.281413
2'-deoxyguanosine	Nucleotide	Purine metabolism, guanine containing	0.697776	0.191555	1.01473	0.5076	0.191555	0.915007	0.518612	0.533678	0.891132	0.415476	1.49487	0.414299	0.548379	0.561853	0.191555	0.542734	5.4245	0.988803	1.09469	1.26218	0.712736	1.64474	0.191555	2.92076	1.54187	0.851363	1.07413	2.5145	2.16998	0.191555	0.191555	0.506948	0.367774	4.64586	0.191555	1.0112	0.191555	1.30464	1.12143	0.391782	0.679791	1.25486	1.66467	0.732229	0.641444	0.428167	0.531397
2'-deoxyinosine	Nucleotide	Purine metabolism, (hypo)xanthine/inosine containing	0.676215	0.389804	0.805433	0.389804	0.389804	0.607338	0.389804	0.389804	1.0646	0.389804	2.90777	1.07222	0.389804	0.389804	0.389804	0.389804	4.21046	0.389804	1.69637	1.08954	1	1.5279	0.389804	2.63673	1.07874	0.389804	0.791918	3.10324	1.79425	0.389804	0.389804	0.389804	0.389804	3.8143	0.852797	2.24391	0.389804	1.00909	1.24742	0.389804	0.780441	0.598718	1.59052	0.878623	0.648314	0.409628	1.08695
2-docosahexaenoylglycerophosphocholine*	Lipid	Lysolipid	1.03512	0.169623	0.327889	0.169623	0.719805	0.777499	0.527975	0.169623	1.35859	1.2316	0.434941	1.04765	0.169623	0.169623	0.605145	0.446304	2.05203	0.977388	1.02999	0.37895	0.633484	0.971546	0.702209	0.169623	0.943027	6.57312	0.57248	3.32192	2.36945	0.169623	0.169623	3.30224	0.353151	5.08963	0.668952	0.987383	0.169623	1.46976	2.26068	0.643953	0.540126	0.641393	0.541797	2.79226	1.44928	0.849229	0.169623
2-docosahexaenoylglycerophosphoethanolamine*	Lipid	Lysolipid	2.44294	1.57299	1.28346	0.769216	1.03281	1.51413	1.04487	0.461281	2.35293	2.17697	0.24378	0.366582	0.24378	0.24378	0.72418	0.704107	2.109	0.985827	0.393587	1	0.832325	0.70052	0.24378	0.24378	0.24378	1.11402	0.875207	0.612147	6.35888	0.24378	0.24378	1.3231	1.64236	4.65786	1.19063	1.11147	0.282319	1.80113	7.52946	4.12458	0.24378	0.448509	1.01611	2.88055	3.1462	1.07933	0.634584
2-docosapentaenoylglycerophosphocholine*	Lipid	Lysolipid	1.12267	0.224275	0.224275	0.224275	0.224275	0.224275	0.224275	0.224275	1.65723	0.549583	0.224275	0.224275	0.224275	0.224275	0.593846	0.224275	1.18113	1.06703	0.823696	0.224275	0.324312	0.62158	0.224275	0.224275	0.224275	0.704549	0.224275	0.224275	1.79903	0.224275	0.224275	0.224275	0.431	4.25768	1.08592	0.688668	0.224275	0.501351	1.73968	0.224275	0.224275	0.224275	0.507252	1.89633	1.62806	0.395279	0.224275
2-docosapentaenoylglycerophosphoethanolamine*	Lipid	Lysolipid	1.88865	1.13755	1.83448	0.814871	0.311185	1.25292	0.311185	0.311185	1.19305	1.73544	0.311185	0.311185	0.311185	0.311185	0.567694	0.311185	0.919386	0.311185	0.311185	0.311185	0.311185	0.311185	0.311185	0.311185	0.311185	0.311185	1.01584	0.311185	2.89378	0.311185	0.809259	0.311185	1.15692	2.97294	1.41535	0.311185	0.589314	0.501391	7.97047	2.64151	0.311185	0.311185	0.311185	1.72417	3.29004	0.311185	0.311185
2-eicosatrienoylglycerophosphocholine*	Lipid	Lysolipid	1.121	0.207469	0.531553	0.207469	0.891872	0.207469	0.207469	0.207469	0.99987	0.465248	0.207469	0.207469	0.207469	0.369594	0.207469	0.207469	3.183	0.207469	0.873474	0.207469	1.05464	0.979473	0.207469	0.207469	0.207469	0.721372	0.207469	0.207469	1.36931	0.207469	0.207469	0.207469	0.207469	4.02393	0.991335	3.34472	0.207469	0.825034	1.54889	0.207469	0.473172	0.314204	0.207469	2.16071	2.62238	0.207469	0.207469
2-ethylhexanoate	Xenobiotics	Chemical	0.912132	12.8697	0.967842	3.0282	1.53132	1.05951	1.04383	2.34314	1.2516	1.00068	1.12186	0.978394	3.69873	0.81223	5.42464	0.7819	0.70924	2.51954	0.956251	1.47358	0.75629	0.754328	0.275807	0.435764	0.924302	0.930295	0.873667	0.940401	0.962033	2.1839	2.53792	0.209516	1.49598	0.667823	1.18955	0.576102	1.51258	1.37897	0.759047	2.18541	1.75292	0.35336	0.510823	0.756901	1.03433	0.827586	0.428784
2-hydroxyacetaminophen sulfate*	Xenobiotics	Drug	0.977776	0.977776	0.977776	0.977776	0.977776	0.977776	0.977776	0.977776	0.977776	0.977776	0.977776	0.977776	0.977776	0.977776	0.977776	0.977776	0.977776	0.977776	0.977776	0.977776	0.977776	0.977776	0.977776	0.977776	0.977776	0.977776	0.977776	0.977776	0.977776	0.977776	0.977776	0.977776	0.977776	0.977776	0.977776	0.977776	0.977776	0.977776	0.977776	0.977776	0.977776	0.977776	0.977776	0.977776	0.977776	0.977776	0.977776
2-hydroxybutyrate (AHB)	Amino acid	Cysteine, methionine, SAM, taurine metabolism	0.569595	1.00412	0.177067	1.05736	1.44122	2.03863	0.962994	2.00331	0.828956	1.65203	1.8365	1.66892	1.64467	2.17721	1.36108	1.74831	0.837603	1.50484	0.800447	0.6754	1.18966	0.892571	0.618713	0.672417	0.823166	0.779931	0.625864	0.553618	1.11521	0.610778	0.857269	0.701629	2.45726	2.69022	1.13554	2.37115	0.80758	1.0933	1.92218	1.01667	1.39242	0.492541	1.96399	1.74631	1.80923	1.39063	0.729798
2-hydroxyglutarate	Lipid	Fatty acid, dicarboxylate	1.01565	0.193272	0.282111	0.686724	3.27994	1.05716	0.800028	0.533161	0.775118	1.24483	2.11062	1.59426	0.719827	1.22617	0.269941	3.37554	7.29549	1.16612	15.7542	1.84138	3.16838	2.16068	4.71805	3.28595	3.37677	0.973372	1	4.77479	1.43064	0.546484	2.17631	10.0793	0.527797	5.2261	0.593626	6.04692	0.924218	1.90356	1.94917	0.966667	2.73048	2.79437	2.68775	1.14277	29.6824	1.43328	13.434
2-hydroxyhippurate (salicylurate)	Xenobiotics	Benzoate metabolism	0.372266	0.372266	0.372266	0.372266	0.372266	0.372266	0.372266	0.372266	0.372266	0.372266	1.06757	0.372266	0.372266	0.372266	0.372266	0.372266	0.372266	0.372266	0.372266	0.372266	0.372266	0.372266	0.372266	0.372266	0.372266	0.372266	0.372266	0.372266	0.372266	0.372266	0.372266	0.372266	0.372266	0.372266	0.372266	0.372266	0.372266	0.372266	0.372266	0.372266	0.372266	0.372266	1.55929	0.372266	0.372266	0.372266	0.372266
2-hydroxyisobutyrate	Xenobiotics	Chemical	0.265538	0.731823	0.265538	0.660886	1.07934	0.831301	0.399601	0.555103	0.525527	0.265538	0.265538	0.265538	0.321703	0.970819	0.694211	1.04785	0.265538	0.73511	0.265538	0.756595	0.265538	0.685513	0.517954	0.745284	0.40796	0.265538	0.265538	0.536393	1	0.265538	1.01924	0.538602	1.04059	0.265538	0.506564	0.265538	0.364151	1.10755	0.412632	0.265538	0.815209	0.265538	0.997734	0.265538	0.265538	0.436246	0.265538
2-hydroxypalmitate	Lipid	Fatty acid, monohydroxy	1	0.831149	0.445987	1.01266	1.01433	0.322188	0.695977	0.60437	1.12511	0.977063	0.850183	0.708127	0.954664	0.778828	0.8421	1.047	1.3836	0.728839	1.9322	0.947484	2.54038	0.669616	0.531088	1.43959	1.46323	0.906184	0.812109	0.918525	0.80008	1.0316	1.57641	0.779101	1.30703	1.42804	0.886846	1.02644	0.924712	1.31708	1.2218	0.657901	0.718161	1.17137	0.842653	1.0313	1.80448	0.653703	1.29649
2-isopropylmalate	Carbohydrate	Glycolysis, gluconeogenesis, pyruvate metabolism	0.281219	0.281219	0.318253	0.281219	0.281219	0.474825	0.281219	0.281219	0.281219	0.281219	2.7862	0.398464	0.630586	0.281219	0.382451	0.453347	0.281219	0.281219	3.1656	0.5329	0.365608	0.999679	0.841129	1.96474	0.281219	0.281219	0.581567	0.987885	1.03139	0.281219	0.281219	0.281219	0.536854	1.23386	0.281219	0.281219	0.281219	0.518159	0.281219	0.281219	0.281219	1.94788	1.04107	0.281219	0.281219	0.281219	0.281219
2-linoleoylglycerol (2-monolinolein)	Lipid	Monoacylglycerol	1	0.134575	0.414175	0.134575	0.134575	0.134575	0.413928	0.134575	0.904102	0.134575	1.71363	1.03539	0.987389	0.134575	1.45959	0.134575	2.16274	1	0.134575	2.0662	0.937705	1.50995	0.979907	2.00241	0.134575	0.134575	0.134575	0.134575	0.134575	0.256755	0.907233	0.134575	0.134575	0.134575	0.134575	1.74087	0.887457	2.13914	2.01376	0.134575	0.134575	2.89609	0.134575	2.73206	2.9361	1.51703	1.05456
2-linoleoylglycerophosphocholine*	Lipid	Lysolipid	2.5122	0.257787	0.553477	0.691775	1.74248	0.928375	0.309303	0.107632	1.40583	0.640298	0.269915	0.497324	0.342896	1.04914	0.341876	0.182348	2.99671	1.1905	1.23041	0.298178	1.95087	6.7036	0.849084	0.688834	0.486237	1.01777	0.566796	0.378588	2.15006	0.056987	0.261686	0.204136	0.701343	8.98381	1.11857	1.70313	0.161629	2.57697	2.3938	0.986947	0.902614	1.89284	0.750335	3.17354	2.94371	0.653967	0.910546
2-linoleoylglycerophosphoethanolamine*	Lipid	Lysolipid	1.04764	0.074788	0.322206	0.281792	0.339524	0.773452	0.428507	0.22798	0.382046	0.293029	0.814428	0.334903	0.28023	0.408644	0.074788	0.151781	1.2861	0.189609	0.916004	0.374755	0.49181	1.54288	0.246647	1.04362	0.311526	0.424174	0.39383	0.558326	0.65818	0.074788	0.469718	0.488952	0.26722	1.10092	0.413728	1.26847	0.534149	0.400123	0.516365	0.436655	0.126688	2.36843	0.899077	0.234605	1.19853	0.235816	1.40893
2-methoxyacetaminophen sulfate*	Xenobiotics	Drug	1	1	1	1	1	1	1	1	1	1	1	1	1	1	1	1	1	1	1	1	1	1	1	1	1	1	1	1	1	1	1	1	1	1	1	1	1	1	1	1	1	1	1	1	1	1	1
2-methylbutyroylcarnitine	Amino acid	Valine, leucine and isoleucine metabolism	0.23439	0.175135	0.089699	0.349734	0.422813	0.270049	0.191624	0.165866	0.333664	0.281897	0.636224	0.515284	0.181571	0.447917	0.407539	0.429599	1.67139	0.61926	1.39443	0.476154	0.642378	0.488969	0.494094	0.972131	1.16167	0.237339	0.553628	0.315351	0.354667	0.177402	0.194953	0.48054	0.273329	0.996452	0.237259	0.944196	0.165213	0.475039	0.480503	0.433389	0.553049	0.495747	2.03539	0.089699	1.0558	0.348397	0.448357
2-myristoylglycerophosphocholine*	Lipid	Lysolipid	7.76218	0.304731	2.34423	0.304731	0.304731	0.995167	0.304731	0.304731	3.42751	1.71453	0.49889	1.52623	0.304731	0.813513	0.676269	0.304731	1.26047	1.54562	0.880097	1.3858	0.669134	1.4042	0.304731	0.443261	1.01733	1.04484	1.98292	0.487272	2.8322	0.304731	0.304731	0.304731	1	2.83813	0.952606	1.0265	0.304731	1.67985	6.44866	1.1246	0.943832	0.942377	1.09559	1.49137	1.89566	2.21563	0.630532
2-oleoylglycerol (2-monoolein)	Lipid	Monoacylglycerol	0.116636	0.116636	0.116636	0.116636	0.116636	0.452949	0.116636	0.355043	1.16335	0.116636	2.33457	0.116636	0.116636	0.439843	0.116636	0.116636	2.78928	0.116636	1.64392	1	0.594696	0.116636	0.116636	1.49679	0.116636	0.116636	1.56592	0.116636	0.116636	0.187643	1.48658	0.116636	0.116636	1.02273	0.116636	1.6032	0.116636	2.73905	0.820981	0.116636	0.116636	1.19274	0.116636	0.83989	0.77205	0.116636	0.116636
2-oleoylglycerophosphocholine*	Lipid	Lysolipid	1.80057	0.851861	0.743588	1.31644	1.85889	0.891779	0.279103	0.172339	1.95134	0.633863	0.218568	0.439939	0.56009	1.0105	0.582301	0.432263	1.39599	1.29725	0.731842	0.171086	1.0185	2.21783	0.434562	0.263164	0.551355	0.719113	0.429327	0.148717	2.74936	0.044283	0.498661	0.121735	0.979359	8.58679	0.828822	1.23237	0.074736	2.17008	2.76648	1.49204	2.81616	0.874766	0.343387	3.00656	2.48134	0.475848	0.257859
2-oleoylglycerophosphoethanolamine*	Lipid	Lysolipid	0.871865	0.302431	0.366742	0.75611	0.611279	0.488923	0.501143	0.35083	0.328543	0.155577	0.742826	0.378488	0.326146	0.691783	0.226031	0.310824	0.729437	0.159742	0.440051	0.260777	0.284987	0.910029	0.355851	1.05929	0.381119	0.634588	0.154568	0.374493	0.534493	0.43405	0.478762	0.524297	0.435597	0.89012	0.672867	1.50932	0.24123	0.329313	0.348738	0.45839	0.408682	1.09796	0.457623	0.356563	0.340487	0.257252	0.336305
2-oleoylglycerophosphoserine*	Lipid	Lysolipid	0.194769	0.194769	0.692594	0.582811	0.194769	0.782061	0.707552	0.381344	2.56568	0.819529	1.08055	1.39748	1.09627	0.622829	0.277071	0.62126	2.16615	0.194769	3.04476	0.352436	0.516379	0.554566	0.194769	13.5628	0.617097	0.767712	1.05175	1	2.99637	0.194769	0.394151	0.194769	0.288805	1.69371	0.710724	3.29567	0.194769	0.530918	0.815639	0.194769	0.194769	3.86475	0.760211	0.194769	1.06543	0.194769	1.92042
2-palmitoleoylglycerophosphocholine*	Lipid	Lysolipid	11.6412	0.485951	1.12437	0.621198	1.2111	1.17556	0.736485	0.297494	4.38908	1.58278	1.24204	0.79903	0.201493	0.662827	0.549606	0.908404	4.58256	2.13955	2.12738	1.00734	0.961012	1.80865	0.716285	0.871339	1.51213	1.55285	2.0681	0.544841	4.22656	0.201493	0.201493	0.774729	0.82128	7.94976	0.943748	6.06164	0.201493	2.25371	6.20428	0.885298	0.340048	1.74298	0.957104	1.63107	3.26727	1.04603	0.360395
2-palmitoylglycerol (2-monopalmitin)	Lipid	Monoacylglycerol	0.405746	0.228328	0.384163	0.228328	0.228328	0.668863	0.494647	0.832267	1.59607	0.500539	2.24887	1.49228	1.46921	0.228328	0.231309	0.774861	1.93298	0.228328	0.736335	0.84659	0.701868	1.48177	0.228328	1.97298	0.507054	0.228328	1	0.900229	1.96488	0.228328	0.228328	0.228328	0.228328	1.87476	0.936191	2.25436	0.228328	2.1469	1.12934	0.228328	0.228328	2.30574	0.813214	1.09046	1.00474	0.914453	1.16043
2-palmitoylglycerophosphocholine*	Lipid	Lysolipid	1.87213	0.868012	1.18273	0.840403	1.29692	0.976159	0.240417	0.292691	1.68892	1.06787	0.276326	0.952595	0.648972	0.698783	0.955107	0.502941	2.01779	1.01715	0.381796	0.237978	1.00071	0.753205	0.36448	0.216342	0.808103	0.469973	1.23031	0.291731	3.37421	0.182149	0.796772	0.128081	1.32889	5.85803	1.02154	0.9479	0.154047	1.27363	4.37052	1.71922	2.71209	0.500035	0.36443	2.10861	1.15955	0.592742	0.293926
2-palmitoylglycerophosphoethanolamine*	Lipid	Lysolipid	0.014266	0.221021	0.014266	1	0.014266	0.014266	0.257194	0.274572	0.241331	0.014266	0.489504	0.202864	0.188481	0.014266	0.014266	0.014266	0.774712	0.072198	0.045065	0.199904	0.157547	0.949806	0.014266	0.154879	0.216126	0.29232	0.244165	0.041527	0.20216	0.138153	0.32002	0.029757	0.206266	0.276391	0.371946	1	0.014266	0.375332	0.096386	0.285723	0.014266	0.014266	0.148335	0.304691	0.254968	0.014266	0.220598
2-phosphoglycerate	Carbohydrate	Glycolysis, gluconeogenesis, pyruvate metabolism	1.05686	0.082331	0.063759	0.603577	1	1.26419	0.561043	0.063759	1.35694	0.177366	1.48493	1.0215	1.2687	0.063759	0.528211	0.063759	1.25979	0.372945	0.063759	1.43665	0.063759	0.82512	0.905038	0.369422	1.86468	0.063759	0.503668	0.468046	0.063759	0.859536	1.06987	0.063759	0.063759	0.063759	0.707919	0.343959	0.914654	1.67839	0.399269	0.896825	1.56784	0.063759	0.063759	0.9715	1.35175	0.878495	0.293938
2-stearoylglycerophosphocholine*	Lipid	Lysolipid	0.76381	1.26638	0.671467	0.712693	1.44917	0.319197	0.431026	0.740397	0.521828	0.530619	0.203491	1.00229	0.754187	0.661643	1.59821	0.203491	1.0125	1.22754	0.369932	0.203491	0.886189	1.01386	0.2929	0.203491	0.311918	0.498227	0.339293	0.203491	0.763106	0.203491	0.509798	0.203491	0.605203	1.87037	1	0.66136	0.36723	1.04443	0.98802	1.47494	4.69236	0.203491	0.203491	1.20411	0.520974	0.585964	0.34832
2-stearoylglycerophosphoethanolamine*	Lipid	Lysolipid	0.03282	0.03282	0.03282	0.03282	0.03282	0.03282	0.03282	0.03282	0.03282	0.03282	0.03282	0.03282	0.03282	0.03282	0.03282	0.03282	0.03282	0.03282	0.03282	0.03282	0.03282	0.03282	0.03282	0.03282	0.03282	0.03282	0.03282	0.03282	0.03282	0.03282	0.03282	0.03282	0.03282	0.03282	0.03282	0.30675	0.03282	0.03282	0.03282	0.03282	0.03282	0.03282	0.03282	0.03282	0.03282	0.03282	0.03282
3-(4-hydroxyphenyl)lactate	Amino acid	Phenylalanine & tyrosine metabolism	0.254856	0.346557	0.274548	0.933377	1.24603	0.661034	1	0.411816	1.42894	1	1.20377	0.980284	1.25084	1.02442	0.753235	0.881371	1.23315	1.03342	3.20215	0.706995	1.53015	0.849626	0.6125	1.64037	1.48523	0.510097	1.90057	0.853823	0.884796	1.68261	1.11731	0.888699	1.26852	1.64317	0.539271	1	1.50786	1.42115	1.38056	1.1884	1.29415	0.523897	1.81729	0.757304	1.44895	0.458252	0.635167
3-(cystein-S-yl)acetaminophen*	Xenobiotics	Drug	0.292294	0.292294	0.292294	0.292294	0.292294	0.292294	0.292294	0.292294	0.292294	0.292294	0.292294	0.292294	0.292294	0.292294	0.292294	0.292294	0.292294	0.292294	0.292294	0.292294	0.292294	0.292294	0.292294	0.292294	0.292294	0.292294	0.292294	0.292294	0.292294	0.292294	0.292294	0.292294	0.292294	0.292294	0.292294	0.292294	0.292294	0.292294	0.292294	0.292294	0.292294	0.292294	0.292294	0.292294	0.292294	0.292294	0.292294
3-(N-acetyl-L-cystein-S-yl) acetaminophen*	Xenobiotics	Drug	0.182583	0.182583	0.182583	0.182583	0.182583	0.182583	0.182583	0.182583	0.182583	0.182583	0.182583	0.182583	0.182583	0.182583	0.182583	0.182583	0.182583	0.182583	0.182583	0.182583	0.182583	0.182583	0.182583	0.182583	0.182583	0.182583	0.182583	0.182583	0.182583	0.182583	0.182583	0.182583	0.182583	0.182583	0.182583	0.182583	0.182583	0.182583	0.182583	0.182583	0.182583	0.182583	0.182583	0.182583	0.182583	0.182583	0.182583
3,4-dihydroxyphenethyleneglycol	Amino acid	Phenylalanine & tyrosine metabolism	0.219343	0.219343	0.219343	0.219343	0.219343	0.287633	0.219343	0.219343	0.219343	0.219343	0.219343	0.219343	0.219343	0.219343	0.219343	0.219343	0.219343	0.219343	0.219343	0.219343	0.219343	0.340435	0.219343	0.225117	0.219343	0.445279	0.219343	0.219343	0.219343	0.219343	0.219343	0.219343	0.219343	0.219343	0.219343	0.219343	0.219343	0.219343	0.219343	0.219343	0.219343	0.219343	0.219343	0.219343	0.219343	0.219343	0.219343
3-aminoisobutyrate	Nucleotide	Pyrimidine metabolism, thymine containing; Valine, leucine and isoleucine metabolism/	3.48163	0.415593	0.784718	1.16988	0.858234	5.45582	3.94753	1.24017	3.98961	2.79358	5.05988	3.74996	0.712382	2.79574	0.192994	7.16383	22.3182	1.25803	2.4063	2.9525	2.07504	16.042	2.34465	1.26275	0.949043	2.75854	6.17884	7.85636	0.803208	0.406282	2.21905	3.23873	0.821225	0.316596	2.41187	1	0.093676	3.36882	2.515	0.65832	0.020052	3.24794	3.86142	6.08252	4.20149	10.6888	3.06328
3-carboxy-4-methyl-5-propyl-2-furanpropanoate (CMPF)	Lipid	Fatty acid, dicarboxylate	1.47783	3.43886	0.374685	0.232643	0.435203	1	5.30744	3.63509	14.3232	5.47588	1.12259	0.370544	0.728246	0.383086	0.232643	1.00637	0.591219	1.87611	0.303944	0.286409	3.02955	2.18492	0.232643	0.442406	0.232643	0.710245	0.232643	1	0.232643	0.460521	0.232643	0.405149	3.02075	0.232643	0.232643	1	2.99923	12.2813	1.93647	2.65561	3.11517	0.232643	0.232643	3.80955	2.51956	1.08096	1
3-dehydrocarnitine*	Lipid	Carnitine metabolism	1.09078	0.275647	0.249244	0.523337	1.60312	0.74108	1.0125	0.467256	0.975955	0.580313	0.564301	0.965298	0.502767	1.03185	0.750195	0.744756	3.26161	1.74866	1.35386	0.964616	1.17015	0.990711	0.963465	1.72596	1.86912	0.766315	0.750882	1.15441	1.37423	0.706337	0.544339	0.804715	0.473388	1.91799	0.569691	0.6883	0.725055	1.20228	0.744573	0.494611	0.783386	0.78715	2.02153	1.01769	1.94438	0.669204	1.2391
3'-dephosphocoenzyme A	Cofactors and vitamins	Pantothenate and CoA metabolism	0.304531	0.304531	0.304531	0.304531	0.304531	0.304531	0.304531	0.304531	0.304531	0.304531	0.304531	0.304531	0.304531	0.304531	0.304531	0.304531	0.581552	0.304531	0.304531	0.304531	0.304531	0.304531	0.919949	0.304531	0.304531	0.304531	0.304531	0.304531	0.304531	0.304531	0.304531	0.304531	0.304531	0.772872	0.304531	2.13826	0.304531	0.304531	0.304531	0.304531	0.304531	0.304531	0.682217	0.304531	0.304531	0.304531	1.52774
3-hydroxybutyrate (BHBA)	Lipid	Ketone bodies	0.941414	1.00076	0.045781	1.30581	2.76839	3.35575	0.606037	3.22371	1.13386	0.688851	2.3652	1.10635	2.02499	2.18034	0.255667	2.41321	1.43599	0.723964	0.437195	0.57883	0.495622	0.669433	1.19464	1.80101	0.776814	2.01522	0.417917	0.61169	0.490314	0.222484	0.172782	1.03274	0.846762	0.599778	0.895403	5.04484	0.166021	1.65371	2.28457	0.238832	0.197335	0.589409	1.46778	2.30529	3.2402	1.18348	0.312232
3-hydroxydecanoate	Lipid	Fatty acid, monohydroxy	1.84677	0.748381	0.274359	0.274359	0.527265	0.274359	0.452957	0.274359	1.10371	0.549676	1.32816	0.397307	1.36463	0.274359	0.274359	0.274359	0.274359	0.274359	0.274359	0.912813	1.06512	0.587325	0.274359	1.72523	0.72237	1.22466	1.01908	0.779745	1.02062	0.551824	0.686284	1.42445	0.693938	0.47874	0.521146	0.274359	0.274359	1.50064	0.919298	0.274359	0.274359	0.274359	0.916569	1.72383	0.738626	0.274359	0.662803
3-hydroxyhippurate	Xenobiotics	Benzoate metabolism	0.136585	0.135389	0.135389	0.135389	0.135389	0.135389	0.135389	0.135389	0.289183	0.135389	0.135389	0.135389	0.135389	0.135389	0.135389	0.135389	0.135389	0.135389	0.135389	0.135389	0.135389	0.135389	0.135389	0.135389	0.135389	0.135389	0.135389	0.135389	0.135389	0.135389	0.135389	0.135389	0.135389	0.135389	0.135389	0.135389	0.135389	0.135389	0.135389	0.135389	0.135389	0.135389	0.313037	0.135389	0.135389	0.135389	0.135389
3-hydroxyoctanoate	Lipid	Fatty acid, monohydroxy	0.349212	0.349212	0.349212	0.349212	0.349212	0.726609	0.57707	0.349212	0.874714	0.349212	1.63902	0.349212	1.17737	0.783654	0.692053	0.561503	0.349212	0.929208	0.349212	0.349212	1.11632	0.349212	0.645922	1.73276	0.763828	0.349212	1.28823	0.349212	0.580543	0.404837	0.349212	1.83982	0.996888	0.349212	3.49897	1.03601	0.349212	2.35468	1.20292	0.546037	0.562403	0.814151	1.66041	2.92007	1.00073	0.349212	0.888992
3-indoxyl sulfate	Amino acid	Tryptophan metabolism	0.307027	1.70649	0.307027	2.39726	0.307027	0.307027	0.307027	0.307027	0.307027	0.892096	0.307027	0.307027	0.307027	0.651357	1.55753	0.727995	0.307027	1.11751	0.307027	0.547633	0.679752	0.307027	0.307027	0.307027	0.581366	0.307027	0.415906	0.336534	0.307027	0.307027	0.307027	0.307027	0.307027	0.307027	0.846652	0.307027	0.863236	0.307027	0.574585	1.20404	1.00133	0.307027	1.27201	0.542103	0.307027	0.307027	1.17944
3-methyl-2-oxovalerate	Amino acid	Valine, leucine and isoleucine metabolism	0.278366	1.21329	0.278366	0.278366	1.05975	0.520234	0.278366	0.317432	0.465614	0.622312	0.278366	0.633587	0.898259	0.278366	1.03829	0.661967	0.868943	0.278366	0.278366	0.278366	0.467767	0.278366	0.278366	0.278366	0.522692	0.278366	0.278366	0.437225	0.910537	0.87296	1.52705	0.278366	1.87455	0.278366	0.4433	0.697307	1.70352	1.42389	0.641731	0.568698	0.278366	0.278366	0.606352	0.278366	0.278366	0.278366	0.791008
3-methylhistidine	Amino acid	Histidine metabolism	0.451478	0.451478	0.451478	0.451478	0.451478	0.451478	0.693599	0.932678	0.451478	2.10213	0.451478	0.451478	0.451478	1.4634	0.567307	0.451478	0.451478	0.451478	0.451478	0.451478	1.28462	0.451478	0.451478	0.451478	0.451478	0.451478	0.451478	0.451478	0.451478	0.856662	0.451478	0.451478	0.835231	0.451478	0.451478	0.451478	0.451478	0.451478	0.581073	0.451478	0.451478	0.451478	0.451478	0.451478	0.451478	0.882618	1.53493
3-phosphoglycerate	Carbohydrate	Glycolysis, gluconeogenesis, pyruvate metabolism	0.818981	0.309241	0.245184	0.80528	1.04357	0.819925	0.64263	1.67273	1.4347	0.453783	1.09376	0.84835	1.05215	0.989067	1.11953	2.49193	1.23178	0.379473	0.186443	1.50988	0.459694	0.745447	0.740685	0.352853	2.07966	0.62861	0.616832	0.382601	1.13805	0.595742	1.24085	0.483137	0.754547	0.089822	0.606338	0.318844	0.904351	2.10349	0.703169	0.892639	1.65077	0.881321	0.65942	1.16944	1.4548	1.4379	0.832073
3-ureidopropionate	Amino acid	Alanine and aspartate metabolism	0.730076	0.1895	0.1895	0.945778	0.451241	0.72056	0.78429	0.95436	1.36676	0.1895	0.740885	0.339498	0.452114	0.441249	0.1895	1.48421	1.49778	0.1895	0.1895	1.48029	0.1895	1.66799	1.20938	0.1895	2.42153	0.1895	1.86992	0.89436	2.42955	1.01531	0.716384	0.1895	0.511351	1.48338	0.1895	0.1895	3.08067	0.615878	0.905817	0.542752	0.1895	2.69985	6.52434	0.1895	1.27886	0.1895	0.1895
4-acetamidophenol	Xenobiotics	Drug	0.17509	0.17509	0.17509	0.17509	0.17509	0.17509	0.17509	0.17509	0.17509	0.17509	0.17509	0.17509	0.17509	0.17509	0.17509	0.17509	0.17509	0.17509	0.17509	0.17509	0.17509	0.17509	0.17509	0.17509	0.17509	0.17509	0.17509	0.17509	0.17509	0.17509	0.17509	0.17509	0.17509	0.17509	0.17509	0.17509	0.17509	0.17509	0.17509	0.17509	0.17509	0.17509	0.17509	0.17509	0.17509	0.17509	0.17509
4-acetaminophen sulfate	Xenobiotics	Drug	0.170138	0.170138	0.170138	0.170138	0.170138	0.170138	0.170138	0.170138	0.170138	0.170138	0.170138	0.170138	0.170138	0.170138	0.170138	0.170138	0.170138	0.170138	0.170138	0.170138	0.170138	0.170138	0.170138	0.170138	0.170138	0.170138	0.170138	0.170138	0.170138	0.170138	0.170138	0.731051	0.170138	0.170138	0.170138	0.170138	0.170138	0.170138	0.170138	0.170138	0.170138	0.170138	0.170138	0.170138	0.170138	0.170138	0.170138
4-androsten-3beta,17beta-diol disulfate 1*	Lipid	Sterol/Steroid	0.521509	0.293474	0.293474	0.293474	0.293474	0.293474	0.293474	0.293474	0.293474	3.98949	2.4091	1.65768	0.447048	0.293474	1.93255	2.20323	0.293474	0.293474	0.293474	0.293474	1.00531	0.64933	0.293474	0.293474	1.77194	0.293474	1.1573	0.386455	0.675863	0.293474	3.2278	0.293474	1.62378	1.20178	0.69276	1	0.57905	0.795022	0.932771	1.03649	1.07665	0.293474	0.48832	0.293474	0.293474	0.293474	0.790932
4-guanidinobutanoate	Amino acid	Guanidino and acetamido metabolism	2.12646	0.207598	0.406949	0.207598	0.893398	1	1.96432	0.207598	1.02745	0.671748	0.772259	1.08825	0.701715	0.713148	0.623542	1.90312	2.309	1.15663	1.0256	0.540103	1.26169	0.804926	1.80035	1.53516	3.90761	0.597065	1.40432	1.66006	0.762852	0.544994	0.728342	1.38984	1.39529	0.219566	1.33487	0.207598	0.313323	0.851096	0.601367	1.83757	0.838514	0.667042	3.7944	1.13582	0.8355	2.03705	1.60472
4-hydroxybutyrate (GHB)	Lipid	Fatty acid, monohydroxy	1.03057	0.048996	0.062257	0.504046	0.636954	0.19907	0.268889	0.140257	0.746871	0.289218	2.22532	0.536543	0.188631	0.699481	0.01638	0.445548	5.49922	0.984646	4.1516	0.10779	1.82861	2.43733	4.77668	5.27403	2.51832	0.204749	0.635684	7.40481	1.43954	0.165812	0.149859	10.2798	0.329449	0.410562	0.287767	14.4314	0.556106	0.349981	0.314269	0.095919	0.435568	5.43817	11.5443	4.66637	1.3295	0.413933	9.04318
4-hydroxyglutamate	Amino acid	Glutamate metabolism	0.083378	0.083378	0.083378	0.083378	1	0.083378	1.27737	0.083378	1.95488	0.674482	1.80071	1.79457	0.083378	1.47662	0.083378	0.083378	1.6167	0.448286	0.083378	5.05463	0.083378	0.083378	0.467538	2.44642	2.61986	0.156475	15.7729	0.889612	4.43485	2.25066	0.344507	1.25671	0.083378	0.083378	0.083378	1.27313	1.12096	0.51391	0.21599	0.083378	0.083378	0.689613	0.523629	0.462833	0.083378	0.083378	0.528401
4-hydroxyhippurate	Xenobiotics	Benzoate metabolism	0.274747	0.100632	0.100632	1	0.100632	0.100632	0.100632	0.100632	0.100632	0.737925	0.100632	0.100632	0.100632	0.100632	0.100632	0.100632	0.100632	0.100632	3.51395	0.100632	0.100632	0.100632	0.100632	0.100632	0.100632	0.100632	0.100632	1.43596	0.100632	0.100632	0.100632	0.100632	0.100632	0.100632	0.100632	0.100632	0.406025	0.100632	0.100632	0.100632	0.100632	0.100632	0.100632	0.100632	0.100632	0.100632	0.105905
4-hydroxyphenylacetate	Amino acid	Phenylalanine & tyrosine metabolism	0.285323	0.285323	0.285323	0.285323	0.285323	0.285323	0.452537	0.285323	0.285323	0.692215	0.285323	0.285323	0.285323	0.4254	0.285323	0.663915	0.285323	0.285323	0.285323	0.343285	0.285323	0.285323	0.285323	0.595214	0.285323	0.285323	0.285323	0.936461	0.739262	0.448038	0.285323	0.285323	0.381239	0.285323	0.285323	0.285323	0.285323	0.285323	0.285323	0.285323	0.285323	0.285323	0.285323	0.285323	0.285323	0.285323	0.285323
4-methyl-2-oxopentanoate	Amino acid	Valine, leucine and isoleucine metabolism	0.368415	2.61066	0.244386	0.867284	2.4813	0.365687	0.535602	0.244386	0.415481	0.58028	0.82473	0.646755	0.975054	0.244386	0.778524	0.244386	2.93318	0.244386	0.244386	0.861656	0.692446	0.664158	0.244386	0.883058	0.394654	0.244386	0.69695	0.410301	0.244386	2.07708	3.88192	0.459311	1.68768	0.244386	0.794294	0.706771	3.2181	1.22871	0.831244	1.12007	0.446902	0.244386	0.244386	0.244386	0.244386	0.244386	0.987796
5,6-dihydrouracil	Nucleotide	Pyrimidine metabolism, uracil containing	0.863325	0.141685	0.055345	0.501942	0.80211	0.210767	1.13426	0.493653	0.706666	1.24354	1.80007	1	0.376796	1.03353	0.333344	0.491865	2.30193	0.884681	5.68629	0.055345	1.11264	1.04997	0.606195	0.696949	0.404225	0.426321	0.960857	2.88258	2.81837	0.307963	0.783686	0.777202	0.360162	4.77996	0.799813	8.92475	3.57515	0.652863	1.20916	0.504215	0.957229	0.943608	2.60959	1.71942	1.94117	1.13668	0.757716
5-aminovalerate	Amino acid	Urea cycle; arginine-, proline-, metabolism	0.293304	0.617843	0.947683	1.23355	0.655654	0.814701	1.78065	1	0.293304	1.14084	1.04575	3.28703	0.65773	3.84985	0.293304	1.7864	0.293304	0.445584	0.293304	1.69168	1.24772	1.33495	1.00418	0.891477	0.982235	0.293304	1.08087	1.14279	0.396939	0.293304	1.83218	0.967098	0.324098	0.870484	0.293304	0.293304	0.961101	0.293304	1.34592	1	0.388845	2.05223	0.911899	0.991765	2.81355	0.76069	1.30056
5-HETE	Lipid	Eicosanoid	0.12599	0.464855	0.12599	0.12599	0.845835	0.12599	0.750929	0.12599	0.12599	0.920584	0.12599	0.715775	1	0.728995	0.445937	0.221187	0.12599	0.306178	0.377368	3.3562	0.12599	2.13756	0.194674	0.678643	0.12599	0.387221	1.57917	0.159463	1	2.91322	0.549158	0.539179	0.282609	0.12599	0.397864	0.350318	0.12599	0.12599	0.12599	0.615799	0.12599	0.12599	0.573822	0.12599	0.312294	0.12599	0.566677
5-methyltetrahydrofolate (5MeTHF)	Cofactors and vitamins	Folate metabolism	0.185814	0.185814	0.185814	0.185814	0.185814	0.185814	0.185814	0.185814	0.185814	0.185814	0.185814	0.436085	0.185814	0.185814	0.185814	0.371654	0.185814	0.185814	0.487458	0.185814	0.432758	0.185814	0.185814	0.185814	0.185814	0.185814	0.185814	0.248617	0.185814	0.185814	0.185814	0.185814	0.185814	0.185814	0.497521	0.185814	0.185814	0.185814	0.185814	0.185814	0.185814	0.185814	0.185814	0.185814	0.185814	0.185814	0.272366
5-methylthioadenosine (MTA)	Amino acid	Polyamine metabolism	0.593333	0.271511	0.199053	0.552679	0.414868	0.23817	0.343579	0.555493	0.959207	0.459154	4.15926	0.3338	0.408622	0.48243	0.177174	0.62346	1.363	0.559676	0.825953	0.398393	1.28411	1.30026	2.38879	1.59183	1.49885	0.386517	0.562645	1.8451	1.17205	0.177174	0.327321	2.08835	0.36139	5.19905	0.620072	3.87581	1.0756	1.65384	0.46748	0.515886	1.32832	3.3875	1.74425	3.36919	0.461988	0.434001	4.49825
5-methyluridine (ribothymidine)	Nucleotide	Pyrimidine metabolism, uracil containing	0.571067	0.571067	0.571067	0.571067	0.571067	0.571067	0.571067	0.571067	0.571067	0.571067	0.571067	0.571067	0.571067	0.571067	0.571067	0.571067	0.571067	0.571067	0.571067	0.571067	0.571067	0.571067	0.571067	0.571067	0.571067	0.571067	0.571067	0.571067	0.571067	0.571067	0.571067	0.571067	0.571067	0.571067	0.571067	0.571067	0.571067	0.571067	0.571067	0.571067	0.571067	0.571067	0.571067	0.571067	0.571067	0.571067	0.571067
5-oxoETE	Lipid	Eicosanoid	0.197375	0.197375	0.197375	0.197375	0.562855	0.807667	1.02785	0.377192	0.854013	0.197375	0.603181	1.61722	0.9543	0.79167	0.912366	0.521001	0.197375	0.530564	0.197375	1.03099	0.551185	0.853353	0.342795	0.977656	0.721505	0.197375	1.25138	0.695614	1.04805	1.51942	0.99239	0.197375	0.197375	0.197375	0.197375	0.74082	0.197375	0.480035	0.448383	0.644939	0.197375	0.259667	0.197375	0.633846	0.606225	0.197375	0.197375
5-oxoproline	Amino acid	Glutathione metabolism	0.940367	0.977131	1.10657	1.22527	5.35774	2.74113	2.63282	2.06866	2.34035	1.37659	0.653787	3.17719	2.18698	2.74878	1.1904	1.42205	0.635281	1.33453	1.24796	4.64437	1.16586	1.17715	0.732763	0.733233	0.721386	4.20113	1.28321	0.741045	0.810711	2.18889	1.16805	0.380888	1.68902	0.739932	1.90867	0.346271	0.684383	1.3142	1.14569	2.11557	0.424709	0.672116	0.585853	0.901127	2.41891	1.36601	0.578304
6-keto prostaglandin F1alpha	Lipid	Eicosanoid	2.62935	0.307565	0.307565	0.307565	0.307565	0.307565	0.307565	0.307565	0.307565	1.52446	0.963909	0.307565	0.832456	0.408887	0.307565	0.307565	0.307565	0.307565	0.307565	0.307565	0.307565	0.307565	0.307565	0.307565	0.307565	0.307565	1.53364	0.917216	3.15925	1	0.307565	0.307565	0.307565	0.307565	0.307565	8.15384	0.307565	0.307565	0.307565	0.307565	0.307565	0.307565	0.307565	0.307565	0.307565	0.307565	0.307565
6-phosphogluconate	Carbohydrate	Nucleotide sugars, pentose metabolism	1.4868	0.248587	0.551252	0.191048	1.41691	0.71583	0.824244	0.493444	1.38168	1.46736	1.25409	2.68618	1.09125	2.73397	1.49158	9.38678	7.00252	0.611533	2.36411	1.85029	2.07558	0.706065	0.915826	1.21056	1.28582	1.29675	1.1126	1.0804	1.31638	1.81587	1.26873	0.841956	1.01279	1.5607	0.75014	3.92489	0.950219	1.02323	1.80348	1.0345	1.94618	1.77209	25.0565	0.191048	4.98696	2.3352	3.16514
6'-sialyllactose	Carbohydrate	Fructose, mannose, galactose, starch, and sucrose metabolism	0.908225	0.293063	0.250855	0.071392	0.632445	1.68183	1.02234	0.139918	2.55591	0.902148	3.34596	2.08243	0.218634	1.81556	0.420015	4.00494	4.52703	0.11805	4.83307	1.69969	1.32705	5.83824	19.5532	11.6094	0.534879	2.00575	1.79566	1.19492	9.08187	0.302771	0.131118	5.40128	0.703605	8.55991	1.30445	1.03244	0.435677	1.37163	3.02421	0.099956	0.071392	1	3.50033	0.224632	1.93264	1.13505	25.8978
7-alpha-hydroxy-3-oxo-4-cholestenoate (7-Hoca)	Lipid	Sterol/Steroid	0.832979	0.878062	0.190162	0.190162	2.7176	0.554339	0.590568	1.17952	2.36471	0.990266	3.66623	0.899256	0.997602	1.71766	1.62152	2.30634	2.08697	1.68312	3.5954	0.670139	7.06669	2.69724	0.568248	5.04344	0.900032	1.22692	1.93712	0.549355	3.6647	1.38564	1.39562	0.775102	1.76837	1.03617	1.25257	1.38514	2.23934	7.68682	1	1.10433	1.21912	0.368987	1.14022	1.1041	0.683384	1.04512	1.11734
7-alpha-hydroxycholesterol	Lipid	Sterol/Steroid	0.07732	0.965062	0.07732	0.07732	0.783724	0.07732	0.07732	0.07732	0.07732	0.07732	7.35026	0.07732	0.07732	0.07732	0.07732	0.07732	2.06874	0.07732	1	1.67103	0.07732	0.509126	1.66532	13.7081	0.07732	0.07732	0.07732	0.07732	0.07732	0.8135	0.07732	1.37355	0.07732	0.07732	0.07732	0.87705	0.07732	1.46968	0.07732	0.07732	0.07732	0.715689	0.07732	0.07732	0.07732	0.07732	0.07732
7-beta-hydroxycholesterol	Lipid	Sterol/Steroid	1.11187	1.51467	0.754446	1.12504	0.136955	0.908117	0.839115	0.136955	0.136955	0.136955	3.79381	0.136955	0.136955	0.136955	0.136955	0.136955	0.136955	0.136955	0.815712	8.87397	0.655817	0.136955	0.631787	6.02054	0.136955	0.136955	0.136955	2.08628	1.26315	1.64329	0.430192	1.40831	0.136955	0.136955	0.766842	0.816665	0.520281	1	1.1953	0.371786	0.465045	2.33057	1	0.78563	1.1884	0.547997	0.781618
acetylcarnitine	Lipid	Carnitine metabolism	1.56207	0.374556	0.648598	0.737929	0.621043	1.06261	1.7845	0.398106	1.13073	0.980869	1.47612	0.946568	2.38207	1.64047	0.493159	1.38601	2.6866	2.2491	2.11682	0.521384	1.75292	1.06395	2.85011	4.92009	1.54607	1.37715	1.09829	2.90009	1.3795	0.494568	0.992529	3.72946	0.975161	0.93785	1.61303	1.94488	0.746819	1.59214	1.6559	1.04235	0.862398	1.42558	2.62494	3.56968	4.66155	2.16853	2.94135
Ac-Ser-Asp-Lys-Pro-OH	Peptide	Polypeptide	0.686417	0.358571	0.933493	0.79594	1.23513	1.00921	1.5566	0.678677	2.27457	1.21093	1.94078	1.78243	2.32238	2.06968	0.979677	0.738865	2.59231	1.21556	3.17356	1.32112	1.43166	1.20742	0.654176	1.18403	0.960266	1.38444	2.1271	5.04839	3.81404	0.458158	1.00312	1.23778	1	5.38459	1.15088	1.98874	1.66889	0.66324	2.81762	1.8509	1.27662	1.60746	2.37969	1.31666	2.78371	1.08246	1.23127
adenine	Nucleotide	Purine metabolism, adenine containing	0.707031	0.066575	0.190479	0.172351	0.40186	0.571645	0.198491	0.192398	0.356981	0.293932	5.28896	0.564573	0.117111	0.516009	0.18956	0.381934	4.24695	0.237573	0.518246	0.279765	0.944276	0.920377	2.68878	2.29289	1.35907	0.362989	0.563729	1.97904	1.35022	0.110502	0.19699	2.34575	0.225423	4.87305	0.498522	3.89872	0.777763	0.789182	0.426173	0.15232	0.958837	4.50816	1.4377	3.27932	0.309333	0.614171	4.00634
adenosine	Nucleotide	Purine metabolism, adenine containing	1.46941	0.263567	0.223369	0.348344	2.90226	1.33266	0.895864	0.439242	0.556801	0.92944	0.649213	2.73559	0.680697	3.01694	0.780685	1.91686	1.99596	0.615731	1.3838	0.518026	2.70478	0.431663	2.69006	0.879191	1.54201	0.735414	0.612053	1.72175	1.77194	0.655517	0.890559	1.59613	0.999545	0.66625	1.16491	3.31886	1.07967	1.07596	0.678476	0.707452	2.00015	1.34578	1.10471	1.40722	2.1439	1.92828	2.35492
adenosine 2'-monophosphate (2'-AMP)	Nucleotide	Purine metabolism, adenine containing	1.18391	0.127029	0.32513	0.532639	0.262361	0.792973	0.357354	0.716255	0.854066	0.811979	1.02526	0.668622	0.312869	0.372638	0.510458	0.198798	0.740695	0.540858	1.33877	0.351551	0.82494	1.10019	0.340483	1.29266	0.802539	0.620099	1.14203	0.543291	0.833651	0.322461	0.302595	0.353923	0.785679	1.1356	0.823228	0.731814	0.585711	0.799262	1.44312	0.890552	0.12806	0.734201	1.07264	0.491668	0.631347	0.781152	0.560025
adenosine 3'-monophosphate (3'-AMP)	Nucleotide	Purine metabolism, adenine containing	0.721422	0.439267	0.295949	0.844159	0.587335	0.683177	0.321474	0.437948	0.681956	0.781035	0.941494	0.541949	0.386528	0.646557	1.32803	0.30625	0.90566	0.727497	2.27167	0.448467	0.986955	0.604799	0.374516	0.746334	1.09309	0.720377	0.575376	0.479307	0.803038	0.636435	0.367434	0.538949	0.697138	1.00666	1.27737	0.587352	0.558383	0.892848	0.604177	0.803185	0.418591	0.841076	0.622042	0.582996	0.592373	0.633245	0.299877
adenosine 5'-monophosphate (AMP)	Nucleotide	Purine metabolism, adenine containing	2.10846	0.07151	1.00977	0.107646	1.96555	1.26058	1.82921	0.130747	1.70348	2.93972	0.991397	5.32406	1.22028	4.29349	1.4849	5.10767	1.05912	1.52092	5.26791	1.58184	5.73347	0.54844	2.8285	0.86553	2.71367	3.01648	0.657186	2.21658	1.44351	3.24694	3.96706	2.08941	2.50368	1.66606	1.69937	3.42276	1.46336	2.1434	1.40979	2.44761	3.86307	2.60948	3.74377	1.40397	8.4129	4.47179	4.189
adenylosuccinate	Nucleotide	Purine metabolism, adenine containing	1.29459	0.273458	1.15376	0.273458	0.273458	0.709714	0.747739	0.273458	2.60775	0.305951	0.611178	2.19441	0.37373	0.273458	0.273458	0.273458	0.273458	1.30505	0.407216	0.389394	1.52316	1.72022	0.273458	2.35226	0.273458	0.273458	0.273458	2.43359	1.62555	0.273458	0.273458	2.48383	0.74182	0.273458	0.273458	0.273458	0.273458	0.273458	1.36518	0.273458	0.273458	1.72066	1.65373	0.273458	0.524159	1.01541	2.67579
adipate	Lipid	Fatty acid, dicarboxylate	0.542797	0.439405	0.232426	0.805559	1	1.04185	0.232426	0.232426	0.232426	0.489394	1.84506	1.14844	0.232426	0.232426	0.373286	0.636447	0.232426	0.232426	0.886178	0.232426	0.232426	2.65143	0.232426	8.96343	0.232426	0.420494	0.232426	16.5407	0.578875	1.53133	2.63554	2.22452	0.232426	0.621072	0.232426	0.743576	0.232426	0.232426	0.232426	0.232426	0.422259	0.638066	0.527323	0.232426	0.232426	0.232426	0.432303
adrenate (22:4n6)	Lipid	Long chain fatty acid	0.650121	0.459847	0.642171	0.673567	1.06086	1.00303	1.14292	0.688138	1.33971	1.07565	1.87275	1.2865	1.42105	0.977056	1.31356	0.717499	1.04808	0.350628	1.33442	1.25425	0.993906	1.11761	0.487874	2.7253	2.06087	1.11893	2.01432	1.053	2.40788	2.06724	1.19325	1.2039	0.737358	1.60367	1.15158	1.12273	0.538994	1.01723	1.28434	0.738832	0.607919	1.21915	1.19448	1.01494	0.674984	0.803764	1.21159
agmatine	Amino acid	Polyamine metabolism	0.892777	1.54427	1.16466	0.658661	0.395145	1.26563	0.481944	0.935639	1.20426	2.01478	1.45677	1.26199	0.479355	0.855223	0.385666	1.53483	2.29269	0.871362	2.31561	0.549912	1.00435	1.54801	1.20307	1.04944	0.828656	1.68886	0.782796	0.950508	2.01392	0.525356	0.697316	3.36928	0.099009	2.50011	0.35336	1.47416	1.071	0.982784	1.33691	0.606537	0.523761	0.986969	1.8912	0.991855	0.943199	0.714686	2.58678
alanine	Amino acid	Alanine and aspartate metabolism	0.564192	0.131111	0.224052	0.320202	0.887979	0.437097	0.683418	0.285066	0.601156	0.401066	0.898728	0.718635	0.267791	0.840835	0.242374	0.626286	1.13355	0.631079	1.17967	0.306339	1.01558	1.33508	1.15972	1.09292	0.722085	0.612569	0.858928	1.23768	0.512867	0.196567	0.390143	0.927303	0.651403	0.387955	0.46489	0.94298	0.766894	0.774026	0.640954	0.381477	0.363386	1.56167	1.21266	0.732316	0.734699	0.624714	1.69528
alanylalanine	Peptide	Dipeptide	0.320303	0.21521	0.21521	0.21521	0.21521	0.819005	0.21521	0.21521	1.91165	0.827459	2.64392	1.17684	0.21521	0.780488	0.840648	0.21521	8.43045	0.773206	0.21521	0.689641	0.922256	1.55788	0.969256	2.71022	0.516972	0.21521	1.00329	0.994987	1.1915	0.21521	0.471442	1.26092	1.32753	2.03982	0.805016	3.17923	0.739317	0.812624	0.745795	0.716665	0.791573	2.27419	1.19441	5.12974	0.567445	0.727788	1.30995
alanylglutamate	Peptide	Dipeptide	1.02705	0.04414	0.04414	0.04414	0.04414	0.556043	0.04414	0.04414	1.60504	0.788221	4.34145	0.720415	1.06347	0.739422	0.43532	0.04414	4.26538	0.6157	4.3525	0.04414	0.880236	2.19554	1.04154	3.42064	1.1302	0.082992	0.743138	1.19673	1.33442	0.04414	0.04414	1.93446	0.04414	2.63247	1.37898	4.2476	0.04414	0.340167	0.611145	0.04414	0.418301	2.33486	1.35032	4.3945	0.04414	0.04414	1.6539
alanylglycine	Peptide	Dipeptide	0.517745	0.143434	0.263687	0.165955	0.867216	0.877115	0.59374	0.403228	1.53386	0.714377	2.93369	1.19825	0.495916	1.16521	0.143434	0.531884	3.48049	0.395187	2.297	0.344565	0.982732	0.985416	0.875158	2.45792	1.16176	0.667375	1.15588	1.1287	1.70315	0.35792	0.325313	1.47384	0.288606	2.44815	0.850619	4.97581	0.727335	0.674862	0.861286	0.494907	0.726683	1.50117	1.43413	0.826579	1.17571	0.515546	0.882203
alanylisoleucine	Peptide	Dipeptide	0.081577	0.291642	0.081577	0.081577	0.400659	0.449511	0.465544	0.081577	1	0.491359	4.96881	1.10175	0.081577	0.653614	0.170564	0.081577	10.503	0.264613	3.12403	0.461734	0.916077	1.54354	1.31378	4.16443	0.684671	0.159113	0.464056	1.17284	2.64664	0.081577	0.081577	1.20079	0.951179	2.5647	0.35091	6.88055	0.662338	0.864335	0.323889	0.332493	0.563734	2.78667	1.15094	1.14768	0.081577	0.601594	1.15331
alanylleucine	Peptide	Dipeptide	0.767964	0.924256	0.736797	0.512671	1.03245	1.75702	0.003484	0.003484	4.71408	1.11193	14.8508	2.20433	2.83475	0.764392	0.611142	0.702951	2.5428	1.17838	7.30188	2.9876	2.02351	14.8068	7.58854	10.6727	3.66619	0.043305	1.35553	1.6001	6.22579	0.449181	0.859954	4.51195	0.726023	9.91171	1.8829	20.5915	1.22214	2.20404	0.619602	0.352415	2.18682	7.74373	6.41721	4.63429	1.03998	0.959648	3.33469
alanylmethionine	Peptide	Dipeptide	0.07336	0.07336	0.852535	0.772332	0.61191	1.00564	0.07336	0.07336	2.13581	0.07336	6.53759	0.989692	1.21502	0.715451	0.568545	0.07336	7.62171	0.07336	2.73074	0.988006	1.01031	3.14741	1.74997	3.41727	1.208	0.07336	0.07336	0.820008	2.37616	0.739856	0.798229	1.70564	0.666186	2.85699	0.646412	6.59222	1.20634	0.07336	0.07336	0.664307	0.983297	3.4627	1.805	2.04099	0.07336	1.25398	2.10974
alanylphenylalanine	Peptide	Dipeptide	1.03871	0.39864	0.065682	0.065682	0.065682	1.24286	0.065682	0.065682	4.06107	1.59072	14.7144	0.872632	1.25481	0.345177	0.836301	0.411015	6.25952	0.844467	8.71553	1.73467	1.06945	9.18896	2.56215	9.94679	2.30783	0.068761	1.355	1.79057	4.93664	0.065682	0.498884	2.11998	0.514364	5.17561	0.648081	16.7604	0.866676	1.81085	0.065682	0.065682	1.05808	5.6745	2.72279	1.60612	1	1.38792	3.79088
alanylthreonine	Peptide	Dipeptide	0.154381	0.429026	0.154381	0.154381	0.154381	0.154381	0.154381	0.210401	1.29999	0.154381	4.78332	0.154381	0.154381	0.154381	0.154381	0.154381	12.9982	0.154381	0.154381	0.938509	0.154381	1.48588	0.154381	1.43805	0.154381	0.154381	1.48094	0.516844	1.24736	0.154381	0.154381	0.154381	0.154381	5.4958	0.62812	5.97704	0.154381	0.525434	0.154381	0.154381	0.154381	1	0.154381	9.62484	0.154381	0.154381	0.154381
alanyltryptophan	Peptide	Dipeptide	0.91087	0.100639	0.100639	0.100639	0.745023	1	0.785132	0.279302	1.51385	1.75955	7.53249	1.96766	1.27581	5.9306	0.880381	1.78889	8.31352	0.337472	1.57452	0.793597	0.714082	1.9852	1.04495	2.74165	0.538039	0.100639	1.31699	1.95518	1.37768	0.99408	0.449732	0.806965	0.748461	1.00607	0.75717	3.86073	6.87288	3.28493	1.32481	0.606149	1.52696	2.26774	0.809308	1.39292	1.13266	9.27437	0.83939
alanyltyrosine	Peptide	Dipeptide	0.720857	0.359536	0.586211	0.773083	0.501057	1.67013	0.476864	0.044279	3.979	1.00507	5.70533	1.52662	1.91446	1.16309	0.517906	0.572139	7.01624	1.16751	3.60686	1.3797	1.48163	4.67122	2.77557	5.79071	1.43033	0.130349	1.31111	0.044279	2.18103	0.044279	0.90411	2.19258	0.705254	5.14198	0.92028	7.55328	1.17359	1.39232	0.537064	0.67528	1.74188	4.38798	2.49207	2.58081	1.81827	1.03801	2.09999
alanylvaline	Peptide	Dipeptide	0.312281	0.363071	0.306614	0.40678	0.253185	0.866368	0.081285	0.094508	2.08126	1	5.36963	0.984762	0.930539	1.35515	0.361701	0.331175	14.3585	1.13117	4.86768	0.563756	1.04443	2.01655	1.67005	4.52929	1.02123	0.135371	1.0727	1.7515	3.29423	0.206927	0.17748	1.61913	0.271141	2.68049	0.615239	8.85962	0.710199	0.847741	0.375258	0.081285	0.568481	2.44486	1.41261	1.90391	0.8115	0.624306	1.44763
allo-threonine	Amino acid	Glycine, serine and threonine metabolism	0.107879	0.107879	0.107879	0.107879	0.107879	0.965853	0.107879	0.250091	0.45188	0.107879	0.107879	0.107879	0.107879	0.107879	0.107879	0.107879	1.11059	0.107879	1.21229	0.107879	0.571692	0.107879	0.107879	0.107879	0.107879	1	1.61775	0.799792	0.107879	0.107879	0.107879	0.107879	0.107879	1.04887	0.107879	0.107879	0.107879	0.107879	0.457357	0.107879	0.107879	0.107879	0.107879	0.107879	1.52336	0.62249	0.815227
alpha-glutamylglutamate	Peptide	Dipeptide	0.548715	0.159663	0.364071	0.159663	0.60262	1.02826	0.434956	0.159663	1.62783	0.52075	2.59647	1.42659	1.10288	0.616248	0.159663	1	6.91457	0.159663	2.08161	0.815522	0.159663	2.00971	1.14819	2.25908	0.159663	0.159663	1.02863	1.81217	2.10067	0.475317	0.159663	1.68302	0.524804	3.36574	0.805009	5.15284	1.1806	0.581908	0.561665	0.893415	0.574499	2.3268	2.88719	1.20365	1.56326	1.38216	2.82993
alpha-glutamyltryptophan	Peptide	Dipeptide	0.085612	0.085612	0.085612	0.085612	0.085612	0.430941	0.085612	0.085612	0.899773	0.085612	2.04627	0.085612	0.085612	0.085612	0.085612	0.085612	7.49147	0.085612	1.82327	0.085612	0.085612	1.61978	0.085612	1.75109	0.085612	0.085612	0.085612	0.085612	1.18044	0.085612	0.085612	0.668174	0.085612	0.950627	0.863884	4.81995	0.085612	0.085612	0.085612	0.085612	0.085612	1.39947	0.660919	0.8676	0.085612	0.085612	0.741752
alpha-glutamyltyrosine	Peptide	Dipeptide	0.680575	0.755354	0.067668	0.067668	0.067668	1.4575	0.067668	0.067668	1.69659	0.067668	5.99276	0.932874	0.732042	0.067668	0.067668	0.067668	4.54973	0.067668	5.51928	1.09093	1.10945	3.38185	2.28177	4.70841	2.44142	0.067668	1.39923	1.00053	3.14488	0.067668	0.577985	1.47334	0.391625	2.64358	0.83236	6.46471	0.067668	0.995043	0.067668	0.067668	1.02547	3.18271	1.23148	1.7418	0.067668	0.067668	2.08621
alpha-hydroxyisovalerate	Amino acid	Valine, leucine and isoleucine metabolism	0.656723	1.06947	0.240739	1.10263	1.8226	0.795551	0.552757	0.240739	0.611851	1.46086	1.6923	0.547089	0.913856	0.863451	1.11775	1	1.29703	1.0386	1.72988	0.697481	0.889743	1.15261	1.10136	1.10871	1.0088	0.240739	0.528215	0.764089	0.41366	0.507599	1.74849	1.09817	1.96047	2.0736	0.564762	2.40552	0.846397	1.14716	0.870496	0.62211	1.61553	0.637417	1.25218	0.989208	1.06748	0.607978	1.54648
alpha-tocopherol	Cofactors and vitamins	Tocopherol metabolism	23.9018	0.537059	11.1007	2.65763	2.20127	14.7302	7.00132	11.6307	3.95216	4.6066	9.32513	2.62623	8.26337	5.5656	2.89497	1.82407	22.8685	0.694225	1.28052	12.0213	0.465516	19.5345	9.84061	6.26882	9.71297	6.68231	5.73982	16.7791	11.7105	2.08744	2.89914	16.8579	5.38393	1.94693	6.39663	4.28211	0.223751	3.31552	10.2648	0.973593	1.24793	10.0565	5.20251	8.03233	2.40967	7.09941	3.99197
androsterone sulfate	Lipid	Sterol/Steroid	0.169417	1.2136	0.169417	0.736769	0.65409	0.169417	0.859922	0.169417	0.169417	2.88613	2.04626	2.7815	1.21002	0.169417	1.6978	0.959716	0.169417	0.79278	0.564745	0.169417	0.888913	0.652615	0.169417	0.633629	2.67872	0.169417	0.328537	0.169417	0.917364	0.169417	3.72049	0.169417	2.46003	0.169417	0.784805	0.480834	0.667052	0.169417	0.83127	2.14656	1.23225	0.544336	0.169417	1.25516	0.169417	0.699049	1.15048
anserine	Peptide	Dipeptide derivative	0.181092	0.181092	0.181092	0.181092	0.181092	0.181092	0.181092	0.181092	0.181092	0.181092	0.181092	0.181092	0.181092	0.181092	0.181092	0.181092	0.181092	0.181092	0.181092	0.181092	0.181092	0.181092	0.181092	0.181092	0.181092	0.181092	0.181092	1.88334	0.181092	0.181092	0.181092	0.181092	0.181092	0.181092	0.181092	0.181092	0.181092	0.181092	0.181092	0.181092	0.181092	0.181092	0.181092	0.181092	0.181092	0.181092	0.181092
arabitol	Carbohydrate	Nucleotide sugars, pentose metabolism	0.432772	0.198368	0.184868	0.467752	1.65428	1.00033	0.369659	0.363593	0.400631	0.300043	0.406956	0.995313	0.396822	0.999112	0.478334	1.53565	0.861433	1.01173	0.698147	0.182012	1.35402	0.476543	0.624842	0.583927	0.524426	1	0.470636	1.43757	0.467458	0.36927	0.605207	0.176718	0.782649	0.542825	0.71953	0.34245	0.485541	0.522552	0.658661	0.482408	1.72684	0.647837	0.26571	0.384896	0.997326	1.04407	0.466444
arabonate	Cofactors and vitamins	Ascorbate and aldarate metabolism	1.14504	0.364454	0.39453	0.740517	1.65654	1.02323	0.79443	1	1	1	0.74736	1.5184	0.291429	1.88399	0.481495	1.5376	1.41039	1.40428	0.914617	0.836053	1.36214	0.761684	2.36384	1.6995	1.53646	1.36781	0.369678	1.21199	0.66948	0.578992	1.15471	1.41651	1.07242	0.375331	0.567155	1.93734	0.794664	0.803358	1.00947	1.3748	1.12574	1.69563	1.23526	0.314408	2.3228	1.54	1.1008
arachidate (20:0)	Lipid	Long chain fatty acid	1.24377	0.44511	1.40726	0.690549	0.237525	1.10289	1.38139	1.04157	4.68397	1.2815	1.74337	2.86361	1.01553	0.237525	1.44104	1.20928	1.46002	0.928645	3.50668	1.59453	1.29408	5.19083	0.237525	3.19171	1.94236	0.970261	2.29189	3.18098	5.96154	1	2.19147	1.48295	1.22167	0.237525	1.91618	0.237525	0.980323	2.84683	1.25688	0.680244	0.237525	1.67874	1	2.82184	1.87859	1.07729	2.50661
arachidonate (20:4n6)	Lipid	Long chain fatty acid	0.642815	0.410874	0.514892	0.829881	0.89916	0.730974	0.836596	0.60336	0.668922	0.794957	0.893227	0.834577	0.720066	0.646484	0.825293	0.5479	0.974353	0.386337	0.796864	0.765438	0.526153	0.953277	0.372508	1.39491	1.12343	0.833868	1.06341	0.806898	1.2775	0.839944	0.702318	0.801005	0.525578	0.707016	0.766647	1.1898	0.464936	0.621075	0.674688	0.528066	0.549858	0.678621	0.613152	0.64071	0.388972	0.485917	0.533896
arginine	Amino acid	Urea cycle; arginine-, proline-, metabolism	0.699007	0.328734	0.378484	0.560379	0.592695	0.740041	0.820894	0.601442	0.417388	0.492598	1.1515	0.748843	0.50673	0.843986	0.410347	0.392248	0.971513	0.468784	0.652542	0.537153	0.91924	0.957403	0.843393	0.83436	0.563485	0.580004	0.938684	1.36049	0.679776	0.266147	0.437017	0.642331	0.718767	0.604349	0.832162	0.478548	0.664205	0.966481	0.63893	0.783626	0.576687	1.93401	0.793975	1.06757	0.425003	0.805516	0.981335
argininosuccinate	Amino acid	Urea cycle; arginine-, proline-, metabolism	0.650743	0.053762	0.119072	0.053762	0.346923	0.825952	1	1.06076	0.053762	0.118551	0.053762	1	0.422823	0.053762	0.053762	0.053762	0.053762	0.937635	0.881548	0.414728	1.02795	0.053762	1	0.563633	0.414537	0.053762	0.053762	0.866979	0.053762	0.071304	1	0.053762	1.12484	0.053762	0.053762	0.053762	0.053762	1	0.053762	0.053762	0.556856	3.44458	0.053762	1.25823	0.053762	0.772729	0.053762
arginylleucine	Peptide	Dipeptide	0.787295	0.008808	0.56664	0.008808	1.30802	1.1347	0.008808	0.008808	1.99818	1.28016	17.6759	0.437271	1.54476	0.008808	0.54082	0.395345	1.30632	1.35083	1.57716	2.77072	0.008808	10.8628	1.75763	7.15588	1.02039	0.012043	0.8731	1.40063	1.7401	0.008808	0.008808	1.35268	0.808067	1.80591	3.73646	5.72503	0.991657	2.88122	0.008808	0.008808	1.02322	2.57727	1.89838	8.31745	0.830511	1.23714	1.62213
arginylmethionine	Peptide	Dipeptide	0.112207	0.112207	0.112207	0.112207	0.112207	0.112207	0.112207	0.112207	0.112207	0.112207	1.58519	0.112207	0.112207	0.112207	0.112207	0.112207	1.83205	0.112207	0.112207	0.112207	0.112207	1.31031	0.112207	0.112207	0.112207	0.112207	0.112207	0.112207	0.112207	0.112207	0.112207	0.112207	0.112207	0.556776	1.7868	1.64635	0.112207	0.112207	0.112207	0.112207	0.112207	1	0.112207	3.54553	0.112207	0.112207	0.112207
arginylphenylalanine	Peptide	Dipeptide	0.844584	0.020216	0.020216	0.020216	2.46658	1.16389	0.020216	0.020216	3.96757	1	14.0541	1.22098	1.00998	0.020216	0.807481	0.380017	1.07942	1.01781	1.09448	4.45173	0.837579	10.1914	2.08958	4.68701	0.952261	0.020383	1.28804	0.72413	1.48749	0.479591	1.225	1.61662	0.976788	1.47143	3.20074	5.07988	1.06349	3.37928	0.434871	0.020216	0.819723	4.20571	1.04774	5.81132	1.06001	0.59808	2.02065
arginyltyrosine	Peptide	Dipeptide	0.105155	0.105155	0.105155	0.105155	0.105155	0.105155	0.105155	0.105155	1.84846	0.105155	3.11366	1	0.637051	0.105155	0.105155	0.993185	11.2075	0.105155	2.12446	0.760303	1.26428	2.04301	0.880163	2.63797	0.832523	0.105155	1.16318	0.105155	0.941921	0.105155	0.105155	1.31554	0.105155	2.30818	0.376726	2.91667	0.105155	1.11082	0.105155	0.105155	0.105155	2.51318	0.847164	0.906128	0.105155	0.773061	0.105155
arginylvaline	Peptide	Dipeptide	0.529975	0.111182	0.111182	0.599456	0.992515	2.24723	1.91617	1.21005	1.23486	0.589153	3.87931	2.93248	0.678012	1.42429	0.455353	0.111182	3.72333	0.634457	3.17672	0.535216	0.919852	1.6968	1.81313	1.57933	1.28853	3.42122	1.07122	1.32584	1.57927	0.326284	0.447119	0.88377	0.981233	1.07456	1.28204	1.13287	0.475319	0.697848	1.63695	0.45449	0.540735	1.32515	1.72627	0.572841	0.995611	1.9235	1.13581
ascorbate (Vitamin C)	Cofactors and vitamins	Ascorbate and aldarate metabolism	1.03979	0.052828	0.26147	0.024128	0.099066	1	0.503039	0.269632	0.561616	0.48532	0.706509	2.13117	0.328747	0.835898	0.226048	1.0946	5.24786	1.60482	4.21727	0.247219	1.68139	0.317035	0.579754	2.20147	2.02117	2.16575	0.533307	2.05928	3.69599	0.005016	0.086854	2.2394	0.107054	1.0094	0.026425	4.54929	0.237839	0.398111	2.82055	0.100813	0.912684	1.93041	2.0027	0.367136	1.37529	0.36249	1.62229
asparagine	Amino acid	Alanine and aspartate metabolism	0.23932	0.06087	0.081069	0.185652	0.851297	0.312805	0.318878	0.393364	0.447228	0.302002	1.28735	0.786893	0.301333	0.568092	0.106223	0.357466	1.21326	0.303688	1.13817	0.581766	0.44737	0.762796	0.72707	0.835123	0.560407	0.408611	1.01293	0.764861	0.680381	0.173222	0.183296	0.52606	0.243476	0.973316	0.391077	0.590864	0.64759	0.963056	0.360463	0.465776	0.379207	0.893147	0.844099	0.645509	0.487347	0.422472	0.529197
aspartate	Amino acid	Alanine and aspartate metabolism	0.498196	0.176822	0.231023	0.535286	0.106468	0.723978	0.796194	0.605079	1.22291	0.497293	0.989418	2.1131	0.376778	1.03364	0.661105	0.233412	1.26939	0.450132	0.994975	0.752222	0.569973	1.00323	0.862844	0.809851	0.493237	1.50067	1.59214	0.974775	1.15736	0.243396	0.2178	0.450705	0.442357	1.36284	0.811667	0.239971	0.481352	0.695867	0.793252	0.601784	0.234513	1.0078	1.13161	0.952169	0.45298	0.890315	0.531151
aspartate-glutamate	Peptide	Dipeptide	0.29887	0.121973	0.66368	0.371133	0.121973	0.121973	0.488436	0.31859	0.952957	0.399898	2.11225	0.422208	0.515496	0.121973	0.321792	0.826422	6.53805	0.121973	1.89076	0.469423	0.424072	1.04197	0.56471	1.22285	0.412293	0.121973	0.879272	1.90439	1.51332	0.121973	0.584036	0.764183	0.121973	1.20601	0.504018	1.73296	0.121973	0.269883	0.630333	0.317743	0.121973	1.22088	1.08405	0.653103	0.566613	1.0432	0.472938
aspartylleucine	Peptide	Dipeptide	1.10593	0.241529	0.771645	0.375884	0.473631	0.83069	0.413361	0.05028	2.20344	0.908719	4.76274	1.53896	0.943433	0.820157	0.553446	0.897433	6.97784	0.886947	9.38477	0.976215	1.96041	6.28833	2.33998	6.62015	1.66977	0.172067	1.92061	3.92428	3.45092	0.323107	0.359952	2.18077	0.536757	3.00859	0.648832	11.1384	0.622523	1.18838	0.701998	0.512269	0.92731	4.45096	3.24799	1.73724	1.45372	1.02106	2.16344
aspartylphenylalanine	Peptide	Dipeptide	1.35545	0.308555	0.440012	0.50819	0.226133	0.439999	0.077397	0.077397	2.04562	0.639163	5.6089	1.24815	1	0.53912	0.077397	0.628921	4.56579	0.077397	6.15017	0.724909	1	2.32285	1.19777	3.43664	1.31441	0.14919	1	3.26222	2.60361	0.077397	0.077397	1.23217	0.320287	1.76069	0.636957	5.66955	0.251622	0.959325	0.353179	0.077397	1	2.1803	2.17115	1.09719	0.507039	0.899562	1.82314
aspartyltryptophan	Peptide	Dipeptide	0.22205	0.056965	0.056965	0.185535	0.056965	0.677048	0.363868	0.056965	0.738839	0.348993	2.51643	0.539056	0.52848	0.268413	0.285499	0.555469	6.55189	0.51387	1.91259	0.456929	0.360133	0.803004	0.813587	1.62513	0.485474	0.124439	1	0.90268	0.916054	0.056965	0.056965	0.724883	0.319974	1.64337	0.588561	2.85369	0.207055	0.267361	0.311111	0.295385	0.549383	1.57298	0.814448	1.13354	0.056965	0.509598	0.736194
aspartylvaline	Peptide	Dipeptide	0.735895	1.24575	0.120142	1.82751	0.120142	0.120142	0.665135	0.120142	0.120142	1	0.120142	0.120142	0.761525	0.120142	1.75915	0.120142	0.120142	0.120142	1.35952	0.120142	0.120142	1.09192	0.572382	0.120142	0.774675	0.120142	1.16459	0.120142	0.854988	0.293808	0.120142	0.120142	0.120142	1.1354	0.120142	0.120142	0.120142	0.120142	0.120142	0.120142	1	0.745569	0.120142	0.120142	0.120142	0.120142	0.120142
atenolol	Xenobiotics	Drug	0.271786	0.271786	0.271786	0.271786	0.271786	0.271786	0.271786	0.271786	0.271786	0.271786	0.271786	0.271786	0.271786	0.271786	0.271786	0.271786	0.271786	0.271786	0.271786	0.271786	0.271786	0.271786	0.271786	0.271786	0.271786	0.271786	0.271786	0.271786	0.271786	0.271786	0.271786	0.271786	0.271786	0.271786	0.271786	0.271786	0.271786	0.271786	0.271786	0.271786	0.271786	0.271786	0.271786	0.271786	0.271786	0.343107	1
azelate (nonanedioate)	Lipid	Fatty acid, dicarboxylate	1.30384	1.00103	0.665969	1.18314	0.788484	0.793518	0.384637	1.35575	1	1.69217	1.06048	0.708397	0.856498	0.814044	0.832384	0.486362	3.44015	0.746572	0.732618	1.47835	1.23324	1.73262	1.06661	2.70372	0.961879	0.745573	0.84573	2.61647	2.60626	0.98439	0.857182	1.08562	0.645208	1.61982	0.690479	1.20035	1.00843	1.13306	1.56974	0.731543	0.763676	1.48733	1.21784	1.95654	1.41297	1.81058	0.939997
benzoate	Xenobiotics	Benzoate metabolism	0.567118	6.15874	1.12215	2.43339	0.929033	1.60147	2.15428	1.81073	2.34157	1.48966	0.692954	0.767432	3.21913	0.939595	2.50564	0.866364	0.599178	2.34833	0.377241	1.9568	0.916664	1.00643	0.403246	0.382185	0.616672	0.505561	1.0407	0.497006	0.480338	2.62389	2.77145	0.351043	1.3961	0.761415	1.18311	0.727099	1.60147	1.69084	1.27983	2.51319	1.44861	0.492588	0.681358	0.906588	1.97153	1.44759	0.496646
beta-alanine	Amino acid	Alanine and aspartate metabolism	4.59936	0.828035	2.23296	1.05438	1.36312	2.08049	2.69704	1.55343	2.59018	7.21189	1.68377	2.52597	0.510872	3.97949	0.883097	3.71864	14.7329	0.896478	1.66837	4.64493	4.07534	5.34988	3.79527	2.5933	2.05227	1.26932	4.23855	7.47695	1.26049	0.967399	3.16874	1.76271	1.12191	0.714826	2.05426	0.809899	1.59235	2.33234	2.05051	2.35637	0.201792	8.95219	5.57972	5.72231	2.62135	6.72213	7.44486
beta-hydroxypyruvate	Amino acid	Glycine, serine and threonine metabolism	0.519112	0.519112	0.519112	0.519112	0.519112	0.519112	0.519112	0.519112	0.519112	0.519112	0.519112	0.519112	0.519112	0.519112	0.519112	0.519112	0.519112	0.519112	0.91668	0.519112	0.519112	0.519112	0.519112	0.519112	0.620009	0.519112	0.519112	0.519112	0.519112	0.519112	0.519112	0.86606	0.519112	0.519112	0.519112	0.519112	1.06669	0.519112	0.519112	0.519112	0.519112	1	1.76322	0.519112	0.519112	0.519112	0.519112
betaine	Amino acid	Glycine, serine and threonine metabolism	1.51233	0.259946	0.259946	0.955093	0.844381	1.06165	1.78639	0.267801	1.19777	1.27729	1.09031	1.03406	0.780751	1.61528	0.359732	0.648862	0.259946	1.88351	5.23717	2.12527	1.99104	1.41192	2.02366	1.67076	1.36298	0.997385	1.55849	2.69578	0.259946	0.616852	0.707418	1.09672	0.259946	0.259946	1.51265	0.259946	1.31916	1.34041	0.575357	0.681262	0.259946	0.259946	1.46057	0.259946	1.534	0.940028	0.914125
beta-tocopherol	Cofactors and vitamins	Tocopherol metabolism	1.99741	0.135084	1.01275	1.36487	0.135084	1.35005	1.86485	0.135084	0.135084	2.05902	3.20453	0.135084	1.70538	0.921308	0.770964	1	3.34341	0.135084	0.135084	2.57529	0.135084	5.31448	2.48041	0.765104	0.889332	0.597845	1.80193	1.98134	5.93393	0.135084	0.135084	1.062	0.135084	0.135084	1.41258	1.23148	0.135084	1.6963	2.28693	0.346092	0.135084	1.49075	0.135084	0.835087	0.301213	2.60751	2.66734
bilirubin (E,E)*	Cofactors and vitamins	Hemoglobin and porphyrin metabolism	0.341801	0.341801	0.341801	0.341801	0.341801	0.341801	0.341801	0.341801	0.341801	0.341801	0.341801	0.341801	0.798618	0.341801	0.341801	0.341801	0.341801	0.341801	0.341801	0.341801	0.341801	0.341801	0.341801	0.341801	0.341801	0.341801	0.341801	0.341801	0.341801	0.341801	0.341801	0.341801	0.341801	0.341801	0.341801	0.341801	0.341801	0.341801	0.341801	1.13168	1	0.341801	0.341801	1	0.341801	0.341801	0.341801
bilirubin (Z,Z)	Cofactors and vitamins	Hemoglobin and porphyrin metabolism	0.499615	0.438596	0.438596	0.438596	0.438596	0.438596	0.438596	0.438596	0.438596	1.02076	0.438596	0.967395	0.438596	0.438596	0.438596	0.736377	0.438596	0.438596	0.438596	0.438596	1.78773	0.438596	0.438596	0.438596	0.438596	0.438596	0.438596	0.438596	0.438596	0.438596	0.438596	0.438596	0.438596	0.438596	1.11294	0.438596	0.438596	0.438596	1.20842	1.07087	2.04353	0.438596	0.438596	0.887063	0.438596	0.438596	0.438596
butyrylcarnitine	Lipid	Fatty acid metabolism (also BCAA metabolism)	1.1531	0.04635	0.156718	0.344496	0.240616	0.540919	0.530778	0.168852	1.73939	0.957187	1.64037	0.488567	1.21168	0.776488	0.2761	1.07306	2.7912	1.24242	2.19147	0.229763	1.26392	1.58405	1.23331	3.70235	1.98799	0.938851	0.818672	2.19065	0.973318	0.124049	0.378651	1.67197	0.790696	2.11634	0.738582	3.03344	0.388269	1.08628	1.63123	0.344914	0.653846	2.52687	1.57123	2.84403	5.45969	1.04881	0.7665
caprate (10:0)	Lipid	Medium chain fatty acid	1.00834	2.83191	0.810713	1.3062	0.923429	1.34297	1.072	1.99724	1.55161	1.23331	0.748169	0.815299	1.41554	0.999216	1.19724	1.048	0.866311	1.39462	0.806489	1.30906	0.79949	0.980995	0.596656	1.15699	0.768995	0.655026	1.11244	0.836539	0.798767	1.23314	1.20947	0.648289	1.20643	1.15224	0.957076	0.684997	0.896088	1.32386	1.5328	1.0745	1.36193	0.76642	0.899239	0.715718	0.982847	1.00046	0.691217
caproate (6:0)	Lipid	Medium chain fatty acid	0.528098	2.98082	0.547969	1.2326	0.939346	1.0311	0.709121	2.11251	1.15939	1.48929	0.514085	0.88063	2.09087	0.6927	1.10848	1.02529	0.950689	1.20816	1.01355	1.36656	0.994749	0.907508	0.690352	1.17369	0.691988	0.763907	1.38811	0.749995	0.812811	2.87218	1.25155	0.351144	0.996609	0.880449	1.02474	0.791511	1.13062	1.62851	1.28849	1.16428	0.906015	0.79035	0.694758	1.6119	1.48648	1.30393	0.526318
caprylate (8:0)	Lipid	Medium chain fatty acid	0.309294	3.3111	0.668426	1.45938	0.866212	1.30039	1.0311	1.88065	1.82938	1.14649	0.535332	0.60713	1.67621	0.8063	1.01485	1.34356	1.31917	2.78877	0.309294	1.37557	0.587665	1.11373	0.718001	1.18641	1.22825	0.535223	1.26641	0.791114	0.644043	1.23511	1.02765	0.531197	1.18764	0.935242	1.10434	1.06516	0.893884	1.67343	1.11287	1.04219	1.32577	1	1.07803	1	0.933879	0.928812	0.330303
carnitine	Lipid	Carnitine metabolism	1.61216	0.648463	0.773511	0.653839	1.27629	0.868439	1.19275	0.43021	1.41352	1.38845	1.67585	1.46641	1.02708	1.6859	1.65235	2.16014	3.48487	1.23246	3.05204	3.05969	1.8063	1.36017	1.27934	3.03361	2.31539	0.75741	1.73398	1.31636	1.44127	0.68256	1.5039	1.31713	0.778996	1.43207	0.923623	0.980196	0.911593	0.772287	0.832195	1.04722	0.717638	1.21882	3.16257	1.01014	0.998302	0.667334	1.57997
catechol sulfate	Xenobiotics	Benzoate metabolism	0.763045	0.387555	0.907688	0.952823	0.387555	0.387555	0.715519	0.387555	0.387555	0.717232	0.387555	0.387555	0.387555	0.387555	1.13294	0.387555	0.387555	0.387555	0.387555	0.387555	0.387555	0.387555	0.387555	0.387555	0.978909	0.387555	0.53134	0.387555	1	0.387555	15.6491	0.387555	0.387555	0.387555	1.41743	0.387555	0.487038	0.387555	0.387555	0.659681	1.17984	0.387555	2.13109	0.387555	0.387555	0.387555	0.387555
celecoxib	Xenobiotics	Drug	0.819833	0.819833	0.819833	0.819833	0.819833	0.819833	0.819833	0.819833	0.819833	0.819833	0.819833	0.819833	0.819833	0.819833	0.819833	0.819833	0.819833	0.819833	0.819833	0.819833	0.819833	0.819833	0.819833	0.819833	0.819833	0.819833	0.819833	0.819833	0.819833	0.819833	0.819833	0.819833	0.819833	0.819833	0.819833	0.819833	0.819833	0.819833	0.819833	0.819833	0.819833	0.819833	0.819833	0.819833	0.819833	0.819833	0.819833
C-glycosyltryptophan*	Amino acid	Tryptophan metabolism	0.779134	0.412011	0.467329	0.68538	0.657096	1.24217	0.903867	0.83993	0.762975	0.994499	1.26861	1.25192	0.797414	0.80485	0.752759	0.773109	2.11617	0.652262	1.97406	0.527498	1.1347	1.07851	2.50476	0.76622	0.929478	1.34688	1.1347	1.36521	1.46918	0.274878	0.384274	1.08875	0.597814	1.58514	0.865759	1.54743	0.591222	1.279	0.821976	0.620539	0.747341	1.5315	1.10369	0.520976	0.72137	0.829363	1.05386
chiro-inositol	Lipid	Inositol metabolism	0.752147	1.80521	0.186346	1.46405	0.186346	0.186346	0.466857	0.186346	0.186346	0.186346	1.97147	0.487	0.186346	1.30877	0.186346	0.186346	0.186346	1.0255	0.722081	0.320018	0.761974	1.86485	0.186346	0.519285	3.04716	0.186346	0.186346	0.385063	0.777525	0.186346	0.340109	0.186346	0.186346	0.186346	0.186346	2.93839	0.186346	0.186346	0.919596	0.186346	1.00059	0.186346	0.186346	0.186346	1.57692	0.186346	0.186346
cholate	Lipid	Bile acid metabolism	0.296028	0.296028	1.37543	0.296028	0.296028	0.296028	0.296028	0.296028	0.296028	0.296028	0.738996	0.530879	1.27148	0.296028	1.02999	0.296028	0.296028	0.296028	0.296028	1.41951	0.296028	0.296028	0.296028	0.296028	0.296028	0.296028	0.296028	0.296028	0.296028	0.296028	1.83754	0.296028	0.296028	0.296028	0.296028	0.296028	0.296028	0.296028	0.296028	1.20548	0.669891	0.296028	0.296028	0.296028	0.296028	0.296028	0.296028
cholesterol	Lipid	Sterol/Steroid	1.67708	1.28314	1.37478	0.758903	0.99711	1.38167	1.10631	0.71137	1.125	0.784623	1.39308	0.693821	0.807288	0.398989	0.772862	0.903548	2.07588	0.402901	1.24772	1.46821	0.418906	1.71444	0.939568	1.73687	1.3937	0.600978	1.53013	1.26844	2.45536	1.5178	1.25306	1.729	1.08077	1.63365	1.31979	1.46001	1.22521	1.12942	1.59677	1.01718	0.563649	1.17009	1.12383	1.23423	1.60674	0.998061	1.05038
choline	Lipid	Glycerolipid metabolism	1.50769	1.04507	2.58889	1.30942	1.04401	2.18321	1.82084	1.47004	1.62202	1.49783	0.996898	1.34462	1.1423	1.56692	1.66647	1.16895	0.693088	1.15205	1.39948	2.4352	1.5257	2.0078	0.856369	1.32788	1.69979	2.09427	2.20573	1.42997	0.956313	1.4252	1.11426	1.12713	0.869143	0.714899	0.694719	0.507382	0.700386	0.685093	1.01551	0.576707	0.432229	0.869009	0.647427	0.652763	1.04019	0.775321	0.602049
choline phosphate	Lipid	Glycerolipid metabolism	1.41521	0.566838	0.880039	0.703893	0.896121	1.32229	1.01336	0.933069	2.63232	1.08973	1.55303	1.57155	1.57721	1.48416	1.26862	1.8263	1.46191	0.744025	0.704487	1.34629	1.30139	1.16117	1.20219	2.39285	0.986645	1.91529	1.28561	1.15061	2.01403	1.15051	1.23904	1.922	0.780029	0.816334	1.533	1.16604	0.65439	0.98017	1.71418	0.946145	1.38432	1.27298	1.50458	1.31791	3.36112	1.47426	1.04512
cinnamoylglycine	Xenobiotics	Food component/Plant	0.487847	0.487847	0.487847	1	0.487847	0.487847	0.487847	0.696017	0.487847	0.487847	0.487847	0.487847	0.487847	0.487847	0.487847	0.487847	0.487847	0.487847	0.487847	0.487847	0.487847	0.487847	0.487847	0.487847	0.487847	0.487847	0.487847	0.487847	0.487847	0.487847	0.487847	0.487847	0.487847	0.487847	0.487847	0.487847	0.487847	0.487847	0.487847	0.487847	0.487847	0.487847	0.487847	0.487847	0.487847	0.487847	0.487847
cis-aconitate	Energy	Krebs cycle	3.77014	2.22489	2.22658	2.54758	2.49048	3.75829	7.08938	3.12002	1.41711	3.20901	1.0464	3.43471	2.84725	3.96211	2.32057	2.35395	0.150352	2.16675	0.288911	2.96466	3.40774	2.44619	2.71544	0.753354	2.86414	2.87142	3.59121	2.80019	1.64542	1.36162	2.35828	1.78232	3.38012	1.03255	1.98035	0.495779	1.45976	4.10222	4.16938	2.27059	2.20624	0.514682	3.05631	0.645952	4.43672	4.32533	2.32686
cis-vaccenate (18:1n7)	Lipid	Long chain fatty acid	1.41248	0.470564	1.49588	1.00375	0.916456	1.59643	1.45862	0.732491	2.32497	1.01334	2.77048	1.59964	1.51765	1.03704	0.701026	1.05393	2.56528	0.37384	0.124641	2.2222	0.536382	0.124641	3.15808	5.42467	1.24439	2.33011	3.11531	4.78015	3.95093	0.99497	1.277	5.16487	0.886422	0.839064	1.16365	2.31174	0.383609	1.45138	1.23035	0.717478	0.196063	2.45982	1.11179	0.775129	0.90054	1.19246	1.70811
citalopram	Xenobiotics	Drug	0.525439	0.525439	0.525439	0.525439	0.525439	0.525439	0.525439	0.525439	0.525439	0.525439	0.525439	0.525439	0.525439	0.525439	0.525439	0.525439	0.525439	0.525439	0.525439	0.525439	0.525439	0.525439	0.525439	0.525439	0.525439	0.525439	0.525439	0.525439	0.525439	0.525439	0.525439	0.525439	0.525439	0.525439	0.525439	0.525439	0.525439	0.525439	0.525439	0.525439	0.525439	0.525439	0.525439	0.525439	0.525439	0.525439	0.525439
citramalate	Amino acid	Valine, leucine and isoleucine metabolism	0.447652	0.083233	0.083233	0.201661	0.083233	0.083233	0.083233	0.465914	0.083233	0.672771	0.083233	0.083233	0.922184	0.083233	0.083233	0.3317	0.083233	0.083233	1.1263	0.083233	0.639996	0.263694	0.306594	1.29764	0.285241	0.083233	0.083233	0.083233	0.266164	0.083233	0.422125	0.083233	0.083233	0.368972	0.083233	0.84249	0.239374	0.464118	0.083233	0.083233	0.083233	0.083233	0.083233	0.083233	0.083233	0.083233	0.401845
citrate	Energy	Krebs cycle	6.69533	5.96005	6.8214	7.10326	8.02194	8.56766	22.3313	6.24107	7.62472	11.0014	1.52054	13.528	7.1035	8.05697	5.62079	3.55704	0.706533	21.7773	0.844875	10.615	12.7898	6.47942	3.08933	0.794377	3.6519	8.60972	22.0242	4.72097	2.22874	3.10747	5.49372	2.43931	7.06096	1.02353	9.5529	0.980861	3.27264	12.2579	21.7907	6.89872	3.93185	0.553883	3.37242	4.70642	41.0428	13.8014	5.43027
citrulline	Amino acid	Urea cycle; arginine-, proline-, metabolism	2.46057	1.67941	1.78648	2.78749	2.49168	1.02073	1.89879	3.3768	1.86668	0.825727	1.11925	1.34148	1.29676	2.22925	1.2836	1.92329	0.301604	1.96047	0.716701	1.76051	2.04894	1.57305	0.785478	0.607826	2.71062	1.91961	1.23738	1.23436	0.92809	1.75375	1.27981	1.83447	1.3722	1.03617	0.7461	0.810965	0.815648	1.31567	1.76842	1.14973	1.52524	2.18156	1.04	1.96344	1.11899	1.05953	0.918394
codeine	Xenobiotics	Drug	0.707717	0.707717	0.707717	0.707717	0.707717	0.707717	0.707717	0.707717	0.707717	0.707717	0.707717	0.707717	0.707717	0.707717	0.707717	0.707717	0.707717	0.707717	0.707717	0.707717	0.707717	0.707717	0.707717	0.707717	0.707717	0.707717	0.707717	0.707717	0.707717	0.707717	0.707717	0.707717	0.707717	0.707717	0.707717	0.707717	0.707717	0.707717	0.707717	0.707717	0.707717	0.707717	0.707717	0.707717	0.707717	0.707717	0.707717
cortisol	Lipid	Sterol/Steroid	0.535784	0.535784	0.535784	0.535784	0.535784	0.535784	0.535784	0.535784	0.535784	0.535784	0.535784	0.535784	0.535784	0.535784	0.535784	0.535784	0.535784	0.535784	0.535784	0.535784	0.535784	0.535784	0.535784	0.535784	0.535784	0.535784	0.535784	0.535784	0.535784	0.535784	0.535784	0.535784	1.1016	0.535784	0.778418	0.535784	0.535784	0.535784	0.535784	0.535784	0.535784	0.535784	0.535784	0.535784	14.6963	1	0.535784
cortisone	Lipid	Sterol/Steroid	0.198045	0.198045	0.198045	0.198045	0.198045	0.198045	0.198045	0.198045	0.198045	0.198045	0.198045	0.198045	0.198045	0.198045	0.198045	0.324316	0.198045	0.198045	0.198045	0.198045	0.198045	0.198045	0.198045	0.198045	0.198045	0.198045	0.198045	0.198045	0.198045	0.376013	0.198045	0.198045	0.198045	0.198045	0.198045	0.198045	0.198045	0.198045	0.198045	0.198045	0.198045	0.198045	0.631936	0.198045	0.198045	0.418378	0.571947
creatine	Amino acid	Creatine metabolism	1.04587	0.947758	1.28362	0.734081	1.34501	0.81968	1.55315	1.04817	0.936386	1.67096	1.76107	0.782858	1.77031	2.23657	0.687635	1.10802	1.05211	0.70272	7.31081	1.16461	1.04854	3.19156	1.37604	2.40626	0.950909	1.73073	2.41131	2.48585	4.49924	0.932564	0.88806	1.28619	0.484352	4.67174	0.672759	8.94211	0.954126	0.339076	1.889	1.52228	0.5983	0.936182	2.29533	0.919918	4.88145	0.912623	0.731598
creatinine	Amino acid	Creatine metabolism	0.784091	0.784263	0.348905	2.28212	0.837391	0.534337	0.538662	1.0828	0.572158	0.325077	0.963183	0.408835	0.430428	1.09565	0.583568	0.799425	0.423015	0.696378	0.727499	0.377267	0.683002	0.949737	1.32827	0.745481	0.93752	0.382308	0.415762	0.705449	0.845693	0.716573	0.607522	0.682578	0.411692	1.37849	0.606205	1.01517	0.445093	0.558929	0.930712	0.259283	0.530915	0.354394	0.8578	0.785566	0.508125	0.389932	0.519306
cysteine	Amino acid	Cysteine, methionine, SAM, taurine metabolism	1.10075	0.027845	0.04878	0.097853	0.112413	0.450227	0.133133	0.34569	0.40132	0.150074	1.08856	1.00741	0.243356	0.338715	0.277688	0.939221	4.35469	0.108679	3.05165	0.136283	1.2413	1.111	6.27548	5.00576	0.658558	2.07183	0.370303	1.65581	2.01184	0.025824	0.280338	3.73193	0.295515	1.65983	0.489783	2.39545	0.289396	0.225915	0.60644	0.277316	0.180161	7.21657	1.31739	0.657754	1.22062	0.511572	2.86115
cysteine-glutathione disulfide	Amino acid	Glutathione metabolism	0.256238	0.443247	0.524717	0.474853	1	0.327118	1.02542	0.5988	0.161499	1.48472	1	0.663941	3.14	10.1592	8.1764	0.068278	0.068278	0.313872	0.232284	1.12354	0.850193	1.91346	2.81766	0.814632	7.76465	0.884528	1.71203	0.557191	0.254189	5.77117	2.29361	1.58632	0.51865	7.98934	1.11547	4.80294	9.65607	4.35426	0.410146	4.12179	24.3541	1	9.43713	1.83834	0.324756	2.12383	10.1073
cysteinylglycine	Peptide	Dipeptide	0.062948	0.062948	0.062948	0.062948	0.062948	0.062948	0.062948	0.062948	0.062948	0.062948	0.062948	0.062948	0.062948	0.062948	0.062948	0.062948	0.062948	0.062948	0.062948	0.062948	0.560935	0.062948	0.792596	0.062948	0.062948	0.062948	0.062948	0.062948	0.062948	0.062948	0.062948	0.325601	0.062948	1.17476	0.062948	1.65304	0.062948	0.062948	0.062948	0.062948	0.062948	0.062948	0.062948	0.062948	0.062948	0.062948	1.19644
cystine	Amino acid	Cysteine, methionine, SAM, taurine metabolism	0.981142	0.3023	0.71924	1	0.587958	2.64356	1.85986	2.28912	1.82135	0.911033	1.15277	2.07979	1.94962	1.17693	0.11373	1.16124	0.586262	4.36902	0.877019	5.44306	0.918732	0.708504	1.6567	0.977098	1.43497	0.01869	3.77733	2.73886	0.636643	0.039771	1.96636	1.98497	1.80584	0.01869	0.835976	0.01869	0.197134	3.05199	1.47371	2.40004	0.01869	3.37736	0.048599	5.86647	6.06271	1.48228	0.068722
cytidine	Nucleotide	Pyrimidine metabolism, cytidine containing	0.75416	0.103931	0.103931	0.368129	0.103931	0.650164	0.410272	0.861722	0.34391	0.691166	0.928012	0.700534	0.103931	0.566706	0.491139	0.366597	0.103931	0.599585	0.103931	0.32509	1.21101	0.28498	1.36331	2.16027	0.913928	0.103931	0.495322	1	0.103931	0.313103	0.239577	0.603139	0.74193	1.49576	1.00502	1	0.64037	1.16482	0.785054	0.308783	0.103931	0.959679	0.73103	2.09918	1.16639	0.934953	0.681937
cytidine 5'-diphosphocholine	Lipid	Glycerolipid metabolism	0.350221	0.189298	0.189298	0.189298	0.661308	0.189298	0.189298	0.189298	0.189298	0.189298	0.887445	0.571246	0.189298	0.826728	0.189298	1.30038	1	0.353049	7.35877	0.189298	1.35736	0.189298	2.76536	0.189298	0.559495	0.189298	0.189298	0.869053	1.3715	0.189298	0.189298	2.34712	0.189298	5.45047	0.189298	6.41212	1.26737	0.887577	0.189298	0.189298	3.82626	3.17595	3.40312	0.541859	0.951576	0.388941	4.91736
cytidine 5'-monophosphate (5'-CMP)	Nucleotide	Pyrimidine metabolism, cytidine containing	1.96359	0.204711	0.553914	0.374081	2.12379	2.57255	1.70561	0.995234	2.26026	1.68823	0.871525	3.76552	0.94171	1.49298	1.33208	1.86612	1.69253	2.11329	2.25754	1.61514	3.18133	2.92173	4.75605	3.20662	1.65821	1.39588	1.24412	1.65067	2.72255	0.589897	1.34097	1.63006	2.01442	1.90008	1.4345	1.12147	1.10398	2.82786	1.42494	1.08867	0.659953	5.0564	1.93485	1.59682	1.77477	2.83341	4.7589
cytidine-3'-monophosphate (3'-CMP)	Nucleotide	Pyrimidine metabolism, cytidine containing	0.256819	0.256819	0.256819	0.256819	0.256819	0.256819	0.256819	0.256819	0.256819	0.523334	0.256819	0.256819	0.256819	0.256819	0.256819	0.256819	2.09831	0.256819	0.256819	0.256819	0.256819	0.256819	0.256819	0.999645	0.256819	0.261231	0.719868	0.256819	0.256819	0.256819	0.256819	0.256819	0.256819	1.32132	0.734322	0.256819	0.256819	0.843195	0.256819	0.256819	0.256819	0.256819	0.256819	0.256819	0.256819	0.582671	0.256819
cytosine-2',3'-cyclic monophosphate	Nucleotide	Pyrimidine metabolism, cytidine containing	0.156738	0.156738	0.156738	0.156738	0.156738	0.698577	0.156738	0.195858	0.997564	0.156738	3.91631	0.447285	0.156738	0.156738	0.156738	0.156738	8.96717	0.156738	1.99223	0.156738	0.494021	1.36006	0.156738	1.73383	0.156738	0.366225	0.156738	0.648767	0.714526	0.156738	0.156738	0.861435	0.156738	1.72301	0.64956	4.61923	0.156738	0.670083	0.156738	0.156738	0.156738	1.63635	0.924257	0.89155	0.156738	0.156738	1
deoxycarnitine	Lipid	Carnitine metabolism	1.32739	0.515201	0.62186	0.867251	0.376119	0.483662	0.970389	0.554722	0.907192	1.18557	0.881955	1.40197	0.792039	0.787535	1.29817	2.44448	5.11605	0.819737	1.28719	1.34836	1.12464	0.886559	1.14527	3.39931	1.94872	0.782511	0.85916	1.05356	0.918194	1.38623	1.3183	1.00246	1.11553	1.41955	1.00534	1.38487	0.72465	1.08862	1.14609	1.13241	1.42233	0.703677	2.20043	1.03322	1.34639	1.1215	1.73048
dihomo-linoleate (20:2n6)	Lipid	Long chain fatty acid	2.6516	0.558136	1.23074	0.772084	1.65711	1.85282	2.54728	1.03602	4.17385	2.56162	3.20097	2.12392	2.29634	0.982268	1.13892	0.823203	1.4757	0.602821	3.82461	3.88673	1.76919	2.76531	0.808702	4.56686	4.53287	2.81519	4.80719	4.67434	5.69486	1.8539	1.57171	2.92153	0.872412	1.22913	1.5717	2.15817	0.923172	3.37239	1.7238	0.728263	0.245637	2.47234	1.17458	1.53939	1.90327	1.86455	2.71074
dihomo-linolenate (20:3n3 or n6)	Lipid	Essential fatty acid	1.1838	0.499259	0.715196	0.635391	2.00577	1.30978	1.58634	0.497427	1.06325	1.17619	1.27648	1.13886	1.06978	0.789542	0.786893	0.846002	1.16507	0.452335	1.57842	1.34766	0.866427	1.51314	0.578967	1.88047	2.6835	1.57725	1.96409	1.41829	1.66162	0.615578	0.971545	1.34751	0.440494	1.44826	1.09364	3.16351	0.311705	0.924195	1.05202	0.592361	0.310834	1.11525	0.907691	0.686958	0.581588	0.486011	1.12063
dihydrocholesterol	Lipid	Sterol/Steroid	1.29044	0.406395	0.940274	0.206781	0.206781	0.773339	0.206781	0.519529	0.334774	0.528364	1.04202	0.73288	0.206781	0.206781	0.206781	0.206781	18.2875	0.206781	1.55539	4.18164	0.410235	0.617634	0.206781	4.9004	1.16239	0.546302	0.833284	1.57386	2.07367	1.04377	0.206781	0.698441	0.980442	1.05224	0.896512	2.61228	0.222866	0.474875	1.11337	0.544304	0.206781	0.793262	1.21067	0.847995	1.99023	0.428097	0.737121
dimethylarginine (SDMA + ADMA)	Amino acid	Urea cycle; arginine-, proline-, metabolism	0.183015	0.183015	0.183015	0.537612	0.833426	0.471532	0.662372	0.295394	0.777101	0.33867	0.720691	0.664257	0.183015	0.468536	0.592064	0.441946	2.2577	0.811189	0.463505	0.443579	0.576683	0.609847	0.379722	0.52732	0.379947	0.562644	0.401177	0.418354	0.315075	0.663847	0.183015	0.183015	0.30729	0.91037	0.535035	0.553427	0.433942	0.469013	0.894142	0.400479	0.474191	0.399136	0.787875	0.871669	0.558927	0.280126	0.183015
dimethylglycine	Amino acid	Glycine, serine and threonine metabolism	1.01277	0.419496	0.705823	0.551745	0.904468	0.999076	1.10407	0.826713	0.247848	0.914668	2.21677	0.949605	0.661665	1.69213	0.706828	1.09216	1.21129	1.83263	5.94565	1.97125	1.236	1.09629	1.2313	1.86285	1.15742	1.09342	1.92752	1.73801	0.691897	0.491793	0.687708	0.905564	0.588066	0.773579	1.21818	0.581881	0.80853	1.10294	1.2527	0.899839	0.491758	0.874091	1.35559	0.979531	1.04422	0.677015	0.671393
docosadienoate (22:2n6)	Lipid	Long chain fatty acid	2.33203	0.305295	2.04711	0.891629	2.10126	2.02252	0.170431	1.34544	5.68512	3.0026	3.34547	2.65796	3.74029	1.09838	1.67642	0.170431	1.914	0.979519	4.55341	3.45518	1.41589	3.18915	0.640309	7.05239	0.170431	2.80909	5.24295	4.62178	6.50468	1.67854	3.5729	3.33181	0.751412	0.170431	2.30557	2.24915	1.19695	5.14495	2.40421	1.37588	0.368327	1.19931	0.170431	1.50008	3.10133	2.0165	2.07979
docosahexaenoate (DHA; 22:6n3)	Lipid	Essential fatty acid	0.458312	0.303677	0.297481	0.342643	0.399551	0.77728	1.26218	0.661914	3.09741	0.976732	0.80062	0.730305	0.691248	0.312637	0.312485	0.288342	1.76413	0.405775	0.902214	0.634873	0.799713	1.01805	0.245133	1.05672	0.584188	0.600267	0.728668	0.977604	1.37572	0.554967	0.250796	0.694408	0.536119	0.977737	0.405542	0.780163	0.436955	0.484091	0.986289	0.613204	0.436218	0.62677	0.754075	0.706828	0.879676	0.580453	0.365178
docosapentaenoate (n3 DPA; 22:5n3)	Lipid	Essential fatty acid	0.618716	0.344349	0.704483	0.478478	0.947547	1.35134	2.81969	0.933253	4.01413	1.6529	2.11006	1.1633	1.53127	0.657521	0.828291	0.508812	1.487	0.249484	1.19469	1.49583	0.882731	2.23616	0.272663	2.48631	1.99803	1.23066	2.50334	1.8234	2.6739	1.39199	1.09889	1.53275	0.570409	1.53828	1.5268	0.573505	0.860727	0.888399	1.75115	0.929615	0.305988	1.20001	0.680992	1.08777	1.29128	0.986483	1.08199
docosapentaenoate (n6 DPA; 22:5n6)	Lipid	Essential fatty acid	0.315328	0.229303	0.300066	0.61692	0.786871	1.02058	0.795226	0.212062	1.57819	0.915705	0.554351	1.07094	0.942364	0.572989	1.32945	0.585716	0.689228	0.422879	1.56484	1.14938	0.816677	0.13267	0.332844	1.0382	1.6328	0.896596	1.39252	0.13267	2.42305	1.19754	0.692829	0.13267	0.862673	1.43165	1.18913	1.80548	0.13267	0.484191	0.747627	0.609883	0.445986	0.6671	0.663673	0.59831	0.402029	0.448069	0.530922
docosatrienoate (22:3n3)	Lipid	Long chain fatty acid	1.64578	0.36082	1.16502	0.52675	2.04194	1.26952	1.11387	0.803006	3.30031	3.0054	2.3199	1.81639	1.93243	0.970672	1.24605	1.15149	1.49718	1.13863	5.18096	1.98877	2.47029	3.04618	0.7194	5.43329	5.24304	2.48926	3.05483	2.45355	3.79979	1.13001	1.22884	1.78602	0.827994	2.93592	1.79924	5.02723	0.662676	2.40276	2.1071	0.694273	0.407344	1.51251	1.14282	1.15201	1.32072	0.995277	1.54212
dodecanedioate	Lipid	Fatty acid, dicarboxylate	0.836305	0.556918	0.483503	0.483503	0.483503	0.483503	0.483503	0.962697	0.483503	1.31867	1.84884	0.483503	0.483503	0.483503	0.483503	0.775652	0.483503	0.483503	0.483503	1.03679	0.483503	0.483503	0.483503	1.22792	0.483503	0.483503	0.483503	1	1.39949	0.483503	0.483503	1.00745	0.483503	0.483503	0.483503	0.483503	0.639863	2.06015	0.673194	0.483503	0.483503	0.483503	0.483503	1.52615	0.483503	0.943704	0.600743
eicosapentaenoate (EPA; 20:5n3)	Lipid	Essential fatty acid	0.724739	0.36408	0.492859	0.338449	1.0828	1.19694	3.99226	2.49459	3.08577	0.993623	1.90741	0.608437	0.928574	0.459516	0.647962	0.502126	1.28136	0.189532	0.432384	1.42614	0.38778	1.84277	0.296219	1.84568	2.59105	1.11234	1.45121	1.60622	1.75316	0.667049	0.922778	1.4973	0.875328	0.55436	0.575256	0.720138	0.345243	0.967037	1.51568	0.546804	0.38234	0.821215	0.582355	1.0671	1.40949	0.580019	0.719149
eicosenoate (20:1n9 or 11)	Lipid	Long chain fatty acid	6.02366	0.50932	2.19818	1.95771	2.62026	3.04432	4.91326	2.07231	8.17908	4.16686	7.63603	4.6492	5.13248	1.60165	1.74139	2.83339	2.35142	1.13392	4.43634	8.53096	2.04556	5.14731	1.58689	7.07481	4.9141	4.21973	7.92095	6.79037	9.65084	1.78178	5.40165	6.2065	2.96595	0.781861	2.96096	0.88146	2.18466	8.5335	1.84603	1.61361	0.69498	4.34709	0.796478	2.6625	5.51727	3.42011	4.9767
epinephrine	Amino acid	Phenylalanine & tyrosine metabolism	1	1	1	1	1	1	1	1	1	1	1	1	1	1	1	1	1	1	1	1	1	1	1	1	1	1	1	1	1	1	1	1	1	1	1	1	1	1	1	1	1	1	1	1	1	1	1
ergothioneine	Xenobiotics	Food component/Plant	4.48245	1.00773	1.03606	0.46689	1.96467	0.761421	4.03344	1.09254	5.38074	4.59724	3.9711	2.83456	2.62041	6.72515	2.03534	1.47077	3.97527	7.15829	14.4669	3.05784	3.60049	1.51729	1.93976	3.09875	2.53677	2.28366	1.65743	7.70715	1.16153	1.74805	2.16181	5.18901	1.21257	1.28944	2.62675	6.99441	2.73246	1.59364	2.8898	2.9286	1.12755	1.80096	8.29965	0.57996	2.37848	2.20107	1.00465
erucate (22:1n9)	Lipid	Long chain fatty acid	1.23272	0.130875	1.08017	0.130875	0.729423	1.34971	2.61885	1	1.543	1.30163	4.68329	1.88606	1.5181	0.130875	0.130875	2.11688	1.63362	0.382692	3.37418	2.49273	0.520827	5.88241	1.13777	3.33638	2.11521	0.834185	1.56686	5.08531	3.43234	0.517357	1.94428	3.26693	1.38141	0.130875	1.31274	0.130875	1.06851	4.65726	1.00385	1.05485	0.130875	1.6154	0.130875	1.87837	0.130875	1	2.04923
erythritol	Xenobiotics	Sugar, sugar substitute, starch	0.558352	0.109791	0.104612	0.35839	0.424746	0.337846	0.219942	0.231854	0.543834	0.356415	1.44458	0.821514	0.198695	0.507858	0.211822	0.767865	2.9259	0.571041	3.42492	0.196619	0.814427	0.730876	1.09417	2.2356	1.72352	0.249308	0.514548	8.00601	1.39345	0.338807	0.596342	2.62134	0.414607	1.22447	0.23969	4.20522	0.668011	0.376884	0.423714	0.248708	9.38719	1.87505	1.16588	1.32427	0.87066	0.850893	1.82044
erythronate*	Carbohydrate	Aminosugars metabolism	0.886943	0.250777	0.305961	0.523614	0.669384	1.0254	0.69861	0.241152	0.711122	0.660703	0.827279	1.05422	0.322266	0.898578	0.586213	1.01034	1.46889	0.818026	4.14851	0.586797	0.950354	0.927994	3.1258	1.1846	1.07699	0.51241	0.778894	1.50104	1.71238	0.34109	0.758528	1.14217	0.600491	1.74161	0.635135	3.13201	0.761077	0.632624	0.723434	0.675652	0.736076	1.39419	1.30091	0.55957	1.21734	1.29404	2.24236
ethanolamine	Lipid	Glycerolipid metabolism	0.723021	0.154561	0.553117	0.171135	0.440292	0.564602	0.257758	0.215817	0.600559	0.423397	0.736664	0.944081	0.209913	1.38579	0.337955	0.367195	3.12462	0.485581	2.56712	0.530636	1.63232	1.58618	1.08062	2.39654	1.47532	0.920003	1	1.92974	1.76569	0.069796	0.239937	0.919383	0.090969	1.05766	0.43012	1.38148	0.420132	0.226472	0.500289	0.153485	0.305657	2.20899	0.770839	0.671686	0.477811	0.160545	0.776309
flavin adenine dinucleotide (FAD)	Cofactors and vitamins	Riboflavin metabolism	0.437175	0.180453	0.231729	0.180453	0.180453	0.634432	0.80174	0.180453	0.614609	0.298835	0.500801	0.743428	0.266702	0.305961	0.180453	0.483725	0.916057	0.180453	1.5978	0.244339	0.662397	0.356088	0.38963	0.880225	0.418208	0.427064	0.496272	0.528949	0.420748	0.180453	0.180453	0.411965	0.615427	0.180453	0.180453	0.65989	0.180453	0.230449	0.642256	0.282653	0.180453	0.794994	0.968092	0.180453	0.904623	0.293206	0.405036
fructose	Carbohydrate	Fructose, mannose, galactose, starch, and sucrose metabolism	0.826972	0.227754	0.191672	0.550083	1.06143	0.807726	0.791121	0.220788	1.11352	0.486871	2.48021	3.25877	1.50562	1.54219	0.711919	4.09847	5.58503	1.00104	12.3121	0.277451	1.36848	2.15977	3.55768	2.13068	2.23048	0.960118	2.4468	25.632	3.18289	0.559027	0.544826	4.57584	0.801535	1.96015	0.812063	5.33061	1.47381	1.01565	1.09936	0.81831	25.6252	4.467	3.57953	2.58489	2.83779	3.52424	5.05282
fructose 1-phosphate	Carbohydrate	Glycolysis, gluconeogenesis, pyruvate metabolism	1.67704	0.0593	0.647652	1.03709	0.733629	1.73996	1.53446	0.297349	2.17676	3.74785	1.91221	16.6833	0.962913	1.3091	0.630697	6.38136	2.13652	1.58669	15.7193	0.458207	2.65094	2.69807	4.99459	1.72871	5.33457	1.25547	1.39649	40.2098	4.12394	0.681626	1.2215	9.41537	1.24046	0.0593	0.629057	4.73274	1.22811	1.00046	3.83683	1.04743	4.57399	3.98064	4.97708	1.27987	0.926231	11.7821	5.54523
fructose-6-phosphate	Carbohydrate	Glycolysis, gluconeogenesis, pyruvate metabolism	2.18947	0.631047	1.02531	1.07785	2.91561	2.15913	4.46192	1.47284	2.20651	1.83818	2.08405	5.07567	2.17476	3.16094	1.21389	1.69741	5.04334	2.14345	13.2962	1.81926	4.44825	4.1375	4.94943	1.42563	3.26346	1.81116	8.94632	11.9582	7.61669	0.974685	0.954297	3.07013	0.970813	2.79512	1.93718	4.63144	2.32475	2.15809	5.39222	2.83364	2.56631	2.01744	4.19816	2.0873	6.16862	3.21933	5.42385
fucose	Carbohydrate	Aminosugars metabolism	0.430904	0.17868	0.17868	0.418753	0.679171	0.367988	0.414287	0.259996	0.623917	0.756765	2.08845	1.5303	0.387229	0.842779	0.637823	0.17868	2.68104	0.74561	1.54072	0.365656	0.819171	0.679324	0.483558	1.05585	0.551276	0.703113	1.45311	0.979792	0.916147	0.186805	0.17868	0.762773	0.17868	2.8672	0.346503	2.25871	0.653886	0.568492	0.871296	0.439157	0.17868	1.30132	1	1.07963	0.814942	0.484203	1.13722
fumarate	Energy	Krebs cycle	0.990845	0.105656	0.185383	0.330406	0.802454	0.729445	1.01466	0.511742	0.453684	0.261484	0.376307	1.15394	0.192175	0.91156	0.340638	0.475983	0.588393	0.831856	1.00916	0.352709	1.41447	1.0026	0.983413	1.07409	0.339244	0.786426	0.795164	0.588145	0.240914	0.212503	0.200643	0.539422	0.635303	0.243811	0.856215	0.385038	0.298805	0.369247	0.432866	0.222287	0.134287	0.534919	0.712626	0.812567	0.40843	0.620424	1.09649
gabapentin	Xenobiotics	Drug	0.45737	0.45737	0.45737	0.45737	0.45737	0.45737	0.45737	0.45737	0.45737	0.45737	0.45737	0.45737	0.45737	0.45737	0.45737	0.657216	0.45737	0.45737	0.45737	0.45737	0.45737	0.45737	0.45737	0.45737	0.45737	0.45737	0.45737	0.45737	0.45737	0.45737	0.45737	0.478558	0.45737	0.45737	0.45737	0.45737	0.45737	0.45737	0.45737	0.45737	0.45737	0.45737	0.45737	0.45737	0.45737	0.45737	0.45737
galactose	Carbohydrate	Fructose, mannose, galactose, starch, and sucrose metabolism	1.19423	0.128508	0.291517	0.128508	0.128508	0.301681	0.128508	0.128508	0.77315	0.51896	2.67108	0.751596	0.324009	0.794858	0.128508	0.721644	5.38196	0.128508	5.64957	0.564841	0.128508	1.15179	1.41056	1.8906	0.488857	0.128508	2.49832	2.13677	2.88887	0.272897	0.149307	1.40943	0.128508	3.02858	0.56006	4.45069	0.128508	0.34964	1.36463	0.128508	0.128508	1.40543	1.44844	1.02551	0.528136	0.941856	1.97724
gamma-aminobutyrate (GABA)	Amino acid	Glutamate metabolism	0.750386	0.159583	0.246175	0.451564	0.680026	0.744965	0.528929	0.559352	0.649853	0.776202	0.343452	0.744957	0.253894	0.955911	0.207444	0.707552	1.53024	0.539287	0.810611	0.744047	0.901601	0.662626	0.640724	0.91659	0.9273	0.514158	0.660753	1.66936	0.170891	0.202597	0.493843	0.351694	0.273982	0.155821	0.40779	0.435314	0.53561	0.400843	0.752503	0.411697	0.114173	2.0589	0.799633	1.01875	0.322848	0.770029	0.739705
gamma-glutamylcysteine	Peptide	gamma-glutamyl	2.44219	0.140819	1	0.140819	0.140819	1.06872	0.140819	0.15302	0.766823	0.535872	2.19827	1.40598	0.733028	0.989383	0.140819	2.48206	7.81771	0.741907	9.57729	0.501343	2.24846	2.12423	4.43895	5.27868	3.20052	2.7231	1.00279	1.91256	3.39068	0.140819	0.343702	3.3534	0.140819	3.0192	0.94656	8.866	0.140819	0.821264	0.140819	0.140819	0.685754	3.37193	2.8415	1.1345	1.8246	0.140819	3.22773
gamma-glutamylglutamate	Peptide	gamma-glutamyl	1.05837	0.833668	0.908517	0.115636	0.677112	2.11074	2.03965	2.50129	1.09573	3.91314	1.17421	9.43336	7.62203	14.1695	6.99557	3.06458	0.115636	3.3055	1.52165	15.0832	2.9666	1.09306	5.32712	1.63013	4.76006	10.9482	1.25646	2.05611	1.13697	8.38096	4.7304	3.13863	2.82127	1.58095	6.85401	1.39812	1.2343	1.64574	1.3697	9.63692	1.72102	2.5595	3.03593	0.894902	7.02802	10.4777	11.489
gamma-glutamylglutamine	Peptide	gamma-glutamyl	0.14732	0.397443	0.220564	0.14732	0.14732	0.14732	0.14732	0.14732	0.14732	1.09684	0.14732	2.09972	3.04314	2.21477	2.21881	0.14732	0.14732	0.997798	0.14732	2.07863	1.59864	0.658863	1	0.14732	3.83295	3.08497	1.27314	0.59968	0.710989	1.51309	1.75042	0.556393	1.05673	1.38837	1.36864	0.14732	2.42095	3.47271	0.724549	4.94349	1.30599	2.94348	3.48441	0.14732	0.14732	4.03429	14.8686
gamma-glutamylisoleucine*	Peptide	gamma-glutamyl	0.630752	0.512867	0.225215	0.473822	1.14664	1.2662	0.877624	0.685674	0.643002	1.35227	1.95768	0.984473	0.702543	0.883243	0.225215	1.01591	3.20357	0.774868	1.38909	0.829627	1.18283	1.9965	0.407662	0.975278	2.50385	0.728834	0.707599	0.499561	1.4905	1.15552	1.13311	0.387691	0.787006	0.571235	0.225215	0.225215	0.565653	1.24935	0.452969	0.579869	0.225215	0.921596	0.225215	0.225215	1.16071	0.564016	0.599435
gamma-glutamylleucine	Peptide	gamma-glutamyl	0.998614	1.13869	0.526797	1.47196	4.27564	2.24807	2.14329	1.98999	1.7935	2.25846	2.95287	1.9523	2.11585	3.04317	1.05936	1.2989	1.68692	1.38592	2.19259	1.50791	1.5538	4.07912	0.933908	1.3657	2.30499	1.61864	1.46707	0.800184	1.28914	1.87417	1.41951	0.941965	1.38804	1.10616	1.23667	0.659963	1.00897	2.14353	1.10676	1.29513	0.373624	0.994991	0.575724	0.825818	2.24791	1.3354	0.692732
gamma-glutamylphenylalanine	Peptide	gamma-glutamyl	0.853237	1.08925	0.766351	0.730709	1.92721	1.45612	1.39413	1.16951	1.16777	1.22677	1.30682	1.16082	1.21356	1.51615	1.11265	0.696052	0.87576	0.752403	1.32122	1.06702	1.02204	1.76877	1.01627	1.09466	1.32438	0.826165	1.0247	0.743458	1.00003	1.08884	1.12557	0.692613	1.09569	1.01991	0.353396	0.693164	0.862637	2.06078	0.977958	1.01803	0.910879	0.703913	0.851824	0.353396	1.32228	1.2085	0.869392
gamma-glutamylvaline	Peptide	gamma-glutamyl	0.911577	1.00773	0.263401	1.29838	2.75179	1.55118	1.84397	1.14021	1.67608	2.2103	2.71603	1.45185	1.44843	2.23387	1.46225	0.263401	0.263401	0.8806	1.42723	1.93132	1.0757	3.56017	0.955609	1.64012	2.28519	2.48264	1.04179	0.263401	1.14289	1.03041	0.95042	0.978094	1.55076	1.89569	0.85979	2.07745	0.595593	1.24823	1.16691	0.831816	0.263401	0.8331	0.484241	0.263401	3.02684	1.52702	0.263401
gamma-tocopherol	Cofactors and vitamins	Tocopherol metabolism	6.55084	1.42346	2.37312	2.11076	0.26518	4.58109	5.04654	2.21507	2.5889	5.34566	4.15979	0.556841	5.62766	1.79066	2.86548	1.06573	3.04492	0.892282	0.645992	5.77041	0.033566	9.78364	5.26085	1.1978	2.97947	1.27492	7.56908	8.66582	6.71902	0.499078	1.71088	1.83646	0.918456	1.36272	3.56053	2.69276	1.38609	2.52146	5.1495	1.25877	0.409041	6.49356	1.63971	3.31922	1.01231	7.9802	2.58927
glucarate (saccharate)	Cofactors and vitamins	Ascorbate and aldarate metabolism	0.73034	0.187588	0.309402	0.310731	1.23361	0.697746	0.949447	0.187588	0.267228	0.363719	0.721226	1.1859	0.430079	1.14205	0.187588	1	0.724322	1.45826	9.00983	0.251005	1.78464	0.554182	2.44109	1.29662	0.660506	1.30584	0.741594	1.55489	0.894839	0.187588	0.677819	1.11807	0.187588	1.63165	0.713055	2.09995	0.626803	0.985038	0.339502	0.202841	0.187588	0.55036	2.31111	0.456477	3.49373	1.53459	2.28783
gluconate	Carbohydrate	Nucleotide sugars, pentose metabolism	0.175163	0.685642	0.202078	0.675374	0.719823	0.952662	0.414905	1.20383	0.728643	0.452051	0.413614	0.817248	0.986858	0.422777	0.657222	1.41121	0.882805	1.4223	0.180813	0.176841	0.455047	0.214547	0.784741	0.492967	0.520576	1.26933	0.4292	1.1084	0.475446	0.581364	0.958347	0.293634	0.911639	0.469756	0.698739	0.87507	0.415212	0.420644	0.094622	0.795283	0.960601	0.243755	3.46259	0.529701	0.545114	0.921591	0.327457
glucose	Carbohydrate	Glycolysis, gluconeogenesis, pyruvate metabolism	1.56229	0.856823	0.697055	2.61165	0.676111	1.49176	0.918147	0.841077	2.03585	0.881053	2.06678	2.3931	1.29486	2.10777	0.814215	2.1833	5.03751	2.05532	2.16068	1.04935	3.17167	4.58893	3.14331	3.31405	1.23209	2.35634	1.12225	3.23373	2.91139	0.586233	0.943869	2.5086	1.61062	0.825118	1.15892	3.52214	1.3069	3.2333	1.83289	1.31443	0.962848	3.63169	2.2737	2.78223	1	1.25766	4.0191
glucose 1-phosphate	Carbohydrate	Glycolysis, gluconeogenesis, pyruvate metabolism	1.20232	0.363431	0.943119	0.437261	1.45762	2.60417	3.0986	0.411373	6.18267	2.24882	0.376267	2.62728	0.904274	2.12188	1.34871	4.82034	1	2.18439	2.1194	2.81616	0.344229	1	3.31469	1.77304	1.73657	1.27884	2.82867	2.95665	2.8221	0.268299	1.54794	4.75136	1.55719	1	1.33268	0.838993	0.781549	0.849753	1.26916	0.801343	11.3392	0.877391	2.77988	0.571636	6.51087	4.64147	1.90142
glucose-6-phosphate (G6P)	Carbohydrate	Glycolysis, gluconeogenesis, pyruvate metabolism	1.65248	0.650316	1.13309	0.94944	2.51365	2.021	3.14556	0.93872	2.46524	1.35316	2.55851	3.19745	3.19894	3.83498	1.48564	1.72491	7.82855	2.12805	12.8654	2.578	3.15275	6.82817	6.49393	2.76966	2.14622	3.78159	10.2158	6.7202	7.27952	0.532256	0.897026	4.80263	0.931283	3.29458	1.25886	5.64976	1.78486	2.00312	3.95095	3.56713	2.71308	3.21088	4.20571	3.68423	11.7457	1.89089	5.59665
glucuronate	Carbohydrate	Glycolysis, gluconeogenesis, pyruvate metabolism	0.318283	0.160016	0.182938	0.448373	0.170709	0.403389	0.231206	0.055922	0.055922	0.159032	0.489742	0.78751	0.055922	0.361531	0.055922	0.495131	1.51409	0.323645	1.80042	0.312911	0.637696	0.337619	0.682086	0.901692	0.56419	0.13515	0.346906	0.795333	1.4297	0.055922	0.055922	0.429965	0.188249	0.983923	0.132031	0.055922	0.144908	0.291053	0.945023	0.119134	0.055922	1.166	1.40238	0.055922	0.319917	0.301782	0.668374
glutamate	Amino acid	Glutamate metabolism	1.40119	0.655628	0.762366	1.11976	1.3898	1.39622	1.37032	1.32427	1.52418	0.905848	1.71226	1.53737	1.02651	1.39065	0.762873	1.1616	1.55283	1.13335	1.65033	2.07864	1.35709	1.57691	2.0508	1.37794	1.41763	1.73399	1.40317	1.6773	2.15541	0.706637	0.741776	1.77071	0.874662	1.37971	1.16262	0.974618	0.63329	1.41523	1.45607	0.921904	0.595927	1.8841	1.1443	1.45601	1.96852	1.37326	1.81657
glutamate, gamma-methyl ester	Amino acid	Glutamate metabolism	0.504224	0.124597	0.07319	0.267383	0.192345	0.405174	0.402866	0.255204	0.598682	0.956728	0.97212	1.09093	0.407587	1.34929	0.365984	0.380461	1.17928	0.559734	3.07665	0.437371	1.07235	1.0215	0.92449	1.12609	0.531025	0.85756	0.542878	0.501308	0.932088	0.096983	0.18538	1.3759	0.520259	1.65939	0.585	2.11758	0.724048	1.32591	0.722224	0.321778	0.70966	3.04675	1.05878	0.74881	1.15851	1.33879	1.72891
glutamine	Amino acid	Glutamate metabolism	0.765765	0.831768	0.824666	1.23413	0.943197	1.02965	1.48088	1.23972	0.722193	0.897107	1.26916	1.32628	1.22742	1.06121	1.11906	0.778723	0.766135	1.24063	0.736592	1.5691	1.5311	1.9535	1.32189	0.87817	1.45466	2.39131	1.68222	1.02593	0.648546	0.880347	0.794038	0.809929	1.20871	1.00462	1.34633	1.02154	1.46343	1.69709	1.29653	1.45694	1.13331	2.13662	1.05814	1.85165	0.779629	1.03681	2.05888
glutarate (pentanedioate)	Amino acid	Lysine metabolism	0.608419	0.154626	0.28507	0.605812	0.154626	0.581415	1.26064	0.154626	0.66068	0.345804	0.578466	0.671803	0.422759	0.457488	0.403943	0.42735	0.257634	0.154626	2.22374	0.53732	2.23655	1.44664	1.25728	1.42656	0.747446	1.47097	0.154626	2.26443	0.690887	0.154626	0.520867	2.38976	0.735831	0.246298	1.02754	1.17103	0.465201	1.75663	0.300639	0.590533	0.798564	0.988352	1	1.21851	2.49743	1.17278	2.37176
glutaroyl carnitine	Amino acid	Lysine metabolism	0.66372	0.223701	0.223701	0.223701	0.223701	0.223701	1.24108	0.223701	0.223701	0.223701	0.223701	0.223701	0.223701	0.223701	0.223701	0.237734	0.223701	0.340209	0.223701	0.223701	0.223701	0.223701	1.16419	1.27904	0.223701	0.223701	0.223701	1.75383	0.223701	0.223701	0.223701	0.512104	0.513168	0.223701	0.294498	0.223701	0.223701	0.223701	0.223701	0.576084	0.223701	0.223701	0.223701	0.525422	0.223701	0.436421	0.223701
glutathione, oxidized (GSSG)	Amino acid	Glutathione metabolism	0.01559	0.01559	0.01559	0.01559	0.01559	0.01559	0.01559	0.01559	0.01559	0.01559	0.01559	0.01559	0.01559	0.366281	1.5218	0.01559	0.828516	0.01559	0.01559	0.01559	0.01559	0.01559	0.01559	0.01559	0.938203	0.01559	0.054222	0.01559	0.01559	1.73495	0.221685	0.01559	0.01559	3.40551	0.01559	9.32187	33.671	0.121802	0.01559	0.820238	32.5658	0.01559	10.4954	0.01559	0.01559	0.213625	4.73389
glutathione, reduced (GSH)	Amino acid	Glutathione metabolism	0.512754	0.098386	0.053936	0.053936	0.597183	0.053936	0.053936	0.065951	0.053936	0.053936	0.478441	0.247453	0.053936	0.968508	2.03313	0.053936	1.18717	0.053936	1.188	0.053936	0.561727	1.44214	18.5701	1.21593	6.10022	1.857	0.053936	1.03697	0.699902	0.36623	0.053936	5.00094	0.053936	39.7122	1.25625	157.419	2.5771	0.671825	0.053936	0.053936	2.38841	2.41207	80.1103	3.9264	0.053936	0.053936	150.996
glycerate	Carbohydrate	Glycolysis, gluconeogenesis, pyruvate metabolism	0.380119	0.498766	0.30804	0.618459	1.79452	0.684274	0.701239	0.467632	1.30939	0.397208	2.0841	0.58808	0.945992	0.985479	0.93215	0.800723	1.75495	0.631364	0.983484	1.16237	0.507044	2.05016	0.841623	1.08488	1.18585	0.515176	0.811218	0.663883	0.99322	0.477425	0.870967	0.544535	0.742639	0.677281	0.937687	1.12294	0.87743	1.84811	0.611196	0.815006	0.881842	1.21763	1.36048	1.18777	0.994204	1.15444	1.16761
glycerol	Lipid	Glycerolipid metabolism	0.676435	0.16734	0.303946	0.244858	0.633699	0.852436	0.614751	0.473835	1.01937	0.956321	1.93541	1.30661	0.437499	1.04105	0.444545	0.702217	1.82606	0.491662	1.62239	0.797202	1.01148	1.54022	1.56146	3.19151	1.2556	1.42943	1.71574	3.58914	1.36614	0.413768	0.472836	2.4501	0.473993	0.947846	0.606086	2.1859	0.36632	0.63047	0.692622	0.276421	0.510491	1.53954	1.55787	0.801168	0.668149	0.725403	1.30767
glycerol 2-phosphate	Xenobiotics	Chemical	0.796628	0.19839	0.335776	0.326469	1.37055	1.34006	0.987419	0.124922	2.33234	1.12606	2.11895	1.81956	0.278419	1.46754	0.759021	1.82264	3.19036	0.389997	5.66478	0.932362	1.5203	1.72584	1.58646	2.43566	1.56376	0.470458	1.04664	3.99894	2.61464	0.176166	0.809885	2.75827	0.919458	2.13159	0.546356	0.867855	0.789927	0.80334	2.35817	0.739212	2.73272	2.38128	1.90563	1.32545	1.34404	1.38295	2.88258
glycerol 3-phosphate (G3P)	Lipid	Glycerolipid metabolism	0.624158	0.246761	0.180828	0.241053	0.965981	2.89041	0.844691	0.502847	1.9294	1.06916	1.01725	1.11986	0.309592	1.06364	1.30957	2.5836	1.41926	0.566281	2.50586	0.718019	0.730821	0.937427	1.4207	1.55036	0.720628	0.630599	0.994094	1.31258	1.55618	0.126541	1.03981	1.52788	1.34078	1.02035	0.565417	1.25292	0.702286	0.982747	1.75289	0.799064	0.591487	2.03501	1.31836	0.686998	0.741416	1.08554	2.32302
glycerophosphoethanolamine	Lipid	Glycerolipid metabolism	0.465502	0.017781	0.046684	0.016376	0.705499	1.73287	2.32431	0.016376	0.801522	0.417812	0.196389	1.60775	0.466357	0.419938	0.210938	0.999568	0.891769	0.247839	1.94299	0.795068	0.549997	0.455313	0.621602	0.524671	0.43649	0.016376	0.344851	1.77364	0.89297	0.016376	0.389439	1.09728	0.972028	1.7931	0.10894	2.01901	0.371692	0.35244	0.618898	0.775548	0.051223	2.72472	0.380996	3.12122	0.35382	0.635984	0.202552
glycerophosphorylcholine (GPC)	Lipid	Glycerolipid metabolism	1.44	0.340545	0.705585	0.364354	1.4519	2.24461	1.44173	0.067219	3.53144	1.39682	2.69042	1.4892	0.313541	1.86518	1.2576	1.40383	1.90091	0.649014	3.45193	1.17913	2.40519	1.98145	1.92556	2.68858	1.51022	0.478767	1.33897	2.61155	4.05118	0.244534	1.01634	2.88578	1.47628	2.07719	0.6807	1.11459	1.02662	0.795553	3.51775	1.0269	0.420023	2.541	1.6173	1.2063	1.73786	1.25032	3.36775
glycine	Amino acid	Glycine, serine and threonine metabolism	0.694477	0.12771	0.287707	0.282369	0.990037	1.01571	0.981452	0.423461	0.95924	0.650427	1.05566	1.41022	0.431255	1.27007	0.230954	1.18975	1.0848	0.43745	1.75299	0.888279	0.781729	0.910103	1.5526	1.10845	0.721373	1.20293	0.966002	1.21898	1.1156	0.269248	0.385445	1.3964	0.555854	0.750343	0.75194	0.595628	0.525565	0.779484	0.968239	0.429062	0.360793	1.23659	0.811232	0.804573	1.92153	1.04627	1.09742
glycocholenate sulfate*	Lipid	Bile acid metabolism	0.524031	0.524031	0.524031	0.524031	0.524031	0.524031	0.524031	0.524031	0.524031	0.524031	0.524031	0.524031	0.524031	0.524031	0.524031	0.524031	0.524031	0.524031	0.524031	0.524031	0.524031	0.524031	0.524031	0.524031	0.524031	0.524031	0.524031	0.524031	0.524031	0.524031	0.524031	0.524031	0.524031	0.524031	0.524031	0.524031	0.524031	0.524031	0.524031	0.524031	0.524031	0.524031	0.524031	0.524031	0.524031	0.524031	0.524031
glycolate (hydroxyacetate)	Xenobiotics	Chemical	0.959402	1.21779	1.21511	0.843864	1.17002	1.0169	1.02219	1.25768	0.960222	0.637128	1.31577	0.916483	1.24584	1.0367	1.30952	0.955082	0.98418	1.35972	0.54262	1.4705	1.00267	1.38733	1.00074	0.964237	0.625011	1.05801	0.760468	0.900143	0.865836	1.0237	1.08105	0.671492	0.822779	0.690971	1.14977	1.02743	1.06166	1.09669	1.16218	1.04742	0.837834	1.03599	0.976203	0.921252	0.730963	0.852438	0.811741
glycolithocholate sulfate*	Lipid	Bile acid metabolism	1	0.44535	0.355071	1.22389	0.355071	0.355071	0.61739	0.355071	0.355071	1.30252	0.355071	0.355071	0.355071	0.355071	0.355071	0.355071	0.355071	0.355071	0.355071	0.355071	0.355071	0.355071	0.355071	0.355071	1.53641	1.78182	1.03193	0.355071	0.355071	0.793696	0.355071	0.355071	0.355071	1.76637	0.355071	0.355071	0.355071	0.355071	0.355071	0.355071	0.355071	0.355071	0.355071	0.355071	0.355071	0.355071	0.355071
glycylglycine	Peptide	Dipeptide	0.412913	0.181128	0.254305	0.346179	0.890248	0.327433	0.416131	0.720846	0.527437	0.241788	0.747895	1.0645	0.296513	0.547838	0.254753	0.320175	0.703034	0.431326	0.424181	0.70246	0.882496	0.390064	0.600599	0.685082	0.452381	0.336649	0.731778	0.855375	0.657568	0.252674	0.215323	0.437497	0.229489	0.970126	0.477773	0.058238	0.396312	0.93505	0.460586	0.331375	0.532083	1.51496	0.452117	1.1686	0.343335	0.295	0.295318
glycylisoleucine	Peptide	Dipeptide	0.377647	0.483151	0.533172	0.249522	0.120664	0.487116	0.326998	0.434708	1.22296	0.294987	2.43974	0.851557	0.58585	0.534245	0.220424	0.366613	2.52705	0.533329	1.79256	0.181368	0.81947	1.01191	1.17159	1.83608	0.625622	0.730254	1.14872	1.88556	1.22168	0.304473	0.244589	0.841143	0.300602	2.34017	0.120664	3.00795	0.202572	0.640856	0.471883	0.320136	0.403376	1.78854	0.98459	0.50885	0.471139	0.452837	0.735339
glycylleucine	Peptide	Dipeptide	0.396048	0.112398	0.245934	0.249847	0.124371	0.442126	0.30091	0.169965	1.33935	0.828751	2.29305	3.38769	0.685663	0.897803	0.46448	0.725529	7.9491	0.887161	4.21253	0.315363	3.02686	1.68619	1.14839	3.06209	1.06293	0.51752	1.14129	1.05989	1.46758	0.144643	0.17451	1.13072	0.495956	1.831	0.87895	4.25815	0.422702	0.537263	0.476029	0.279761	1.0662	1.68059	1.68044	1.76827	0.546378	0.571287	0.94637
glycyllysine	Peptide	Dipeptide	0.111978	0.111978	0.381108	0.111978	0.419717	0.481781	0.719756	0.762257	0.582442	0.484447	1.58877	1.12144	0.758766	0.929993	0.176931	0.111978	0.111978	1.10594	1.43292	0.852445	0.839404	1.0111	0.869563	3.40339	1	0.111978	1.23422	1.25078	0.516943	0.162769	0.280685	0.111978	0.40221	0.591884	0.111978	1.70587	0.582444	1.31967	1.07743	0.111978	0.434118	3.49619	0.111978	1.87623	0.111978	0.647895	0.111978
glycylmethionine	Peptide	Dipeptide	0.733631	0.653095	0.520621	0.891281	0.276816	1.05906	0.348227	0.935002	1	0.628699	4.65694	1.0001	1.43484	1.06306	0.908498	0.389357	10.0098	1.03599	1.93805	0.853363	1.35535	2.04069	1.32705	3.94839	0.629637	0.343034	1.17873	1.99106	1.82887	0.359942	0.23851	1.61065	0.436117	3.68636	0.560279	4.67826	0.862675	0.786504	0.626431	0.439824	0.603316	2.00318	2.18612	1.40027	0.608147	0.608108	1.22115
glycylphenylalanine	Peptide	Dipeptide	0.38275	0.38275	0.38275	0.38275	0.38275	0.38275	0.38275	0.38275	0.878684	0.772084	4.78941	0.90598	0.504273	0.38275	0.38275	0.38275	0.38275	0.38275	4.86564	1.04971	1.14735	0.997063	1	1.48371	0.745483	0.38275	0.780607	5.38215	1.85602	0.38275	0.38275	1.1698	0.38275	2.15679	0.38275	3.73334	0.660018	0.737554	0.750901	0.38275	0.606908	1.11615	1.55394	0.38275	0.38275	0.986451	2.28971
glycylproline	Peptide	Dipeptide	1.06778	0.419832	1.00951	0.646995	0.687444	1.01061	0.678825	0.871643	2.1204	0.708398	2.49119	1.76982	1.44857	1.28981	0.624684	0.852754	5.00256	1	1.63478	0.521566	0.931636	2.14209	1.57132	2.17076	0.764036	1.11575	0.834135	1.77645	1.62178	0.251679	0.712089	1.25936	0.819015	1.74942	0.778504	3.18692	1.03208	1.39538	1.08676	0.507055	1.37654	1.6323	0.75828	1.06504	1.3083	1.09686	1
glycylthreonine	Peptide	Dipeptide	0.183341	0.158067	0.13144	0.232527	0.348864	0.259857	0.216838	0.531071	0.446094	0.230258	1.64172	0.466196	0.338346	0.518902	0.301101	0.343135	2.49918	0.19558	1.06689	0.329065	0.361035	0.765298	0.506783	1.3144	0.460373	0.325086	0.806237	0.549224	0.905185	0.111833	0.179004	0.396653	0.252666	0.956847	0.278699	0.943089	0.320596	0.385296	0.398416	0.326692	0.369614	0.80627	0.421388	0.589471	0.258905	0.132732	0.390933
glycyltryptophan	Peptide	Dipeptide	0.190059	0.190059	0.190059	0.190059	0.190059	0.190059	0.190059	0.190059	1.04839	0.190059	3.2247	0.704373	0.591096	0.190059	0.190059	0.190059	7.69132	0.961199	3.39198	0.190059	0.852089	1.93985	0.190059	2.46396	0.821785	0.270816	0.677265	1.62373	1.54016	0.190059	0.385075	0.870093	0.190059	2.25951	0.832571	3.14005	0.661088	0.756779	0.533149	0.463156	0.190059	1.52405	1.3689	1.3108	0.578023	0.190059	1.08875
glycyltyrosine	Peptide	Dipeptide	0.709211	0.690147	0.302439	0.471851	0.302439	1.29709	0.664458	0.611596	1.62837	0.925406	3.72577	1.1078	1.00226	1.23817	0.718565	0.624693	5.89318	1.35919	3.79027	0.95784	1.3435	1.89601	1.06064	2.61198	0.917285	0.505946	1.30001	1.68366	1.34833	0.302439	0.323557	1.55805	0.852633	2.32096	0.798257	2.6061	1.23958	1.27709	0.767741	0.551346	1.29293	1.89404	1.27969	1.24748	1.08719	1.46794	1.29847
glycylvaline	Peptide	Dipeptide	0.240754	0.36391	0.231629	0.414841	0.45643	0.335601	0.329894	0.351898	0.93753	0.355041	2.54868	0.561136	0.746165	0.546927	0.342457	0.217217	3.88331	0.53797	1.01465	0.358618	0.360805	1.00564	0.453702	1.31131	0.411978	0.363157	0.995789	0.79502	0.82388	0.242459	0.341743	0.694403	0.200079	1	0.405881	1.85682	0.254813	0.541755	0.225051	0.434536	0.489123	0.913366	0.670515	1.14428	0.546314	0.345638	0.519607
guanidinoacetate	Amino acid	Guanidino and acetamido metabolism	0.204363	0.168242	0.28433	0.168242	0.168242	0.26613	2.37309	0.168242	0.168242	0.168242	0.168242	0.500024	0.168242	0.168242	0.263704	1.32344	0.168242	0.168242	0.168242	0.168242	0.864783	0.168242	0.168242	0.302015	0.168242	0.168242	0.498181	0.307903	0.168242	0.168242	0.469201	0.168242	0.487783	0.168242	0.168242	0.168242	1.26833	0.168242	0.168242	0.714385	0.168242	0.168242	1.8809	0.168242	0.168242	0.500208	0.168242
guanine	Nucleotide	Purine metabolism, guanine containing	2.07788	2.95378	0.289552	0.151161	0.911691	0.151161	3.19863	4.86101	0.151161	0.473781	0.282921	1.48287	2.54752	2.65399	3.75156	1.38049	0.8297	0.151161	1.73497	0.151161	1.65284	0.151161	0.32818	0.993344	0.806933	0.439053	0.151161	0.151161	5.55892	0.933762	0.151161	1.1126	0.151161	7.08029	0.504683	0.151161	0.233594	0.770548	1.06599	1.85714	2.1623	0.151161	0.305234	0.151161	0.729182	0.151161	3.12193
guanosine	Nucleotide	Purine metabolism, guanine containing	1.32842	0.53668	0.582667	0.503544	0.611661	2.11213	1.40525	0.989	2.53472	1.58159	2.56808	2.42427	1.71471	1.26959	1.18477	1.09189	2.46908	2.03443	4.03585	1.72872	1.80187	2.4674	1.81334	2.01104	1.08564	1.84814	2.64843	1.88195	3.25088	0.165578	0.662477	1.31863	0.829899	3.66206	1.81428	2.74307	0.657998	1.07489	1.96568	1.03855	1.03061	1.32376	1.96261	1.23967	2.061	1.65091	1.59742
guanosine 5'- monophosphate (5'-GMP)	Nucleotide	Purine metabolism, guanine containing	2.72084	0.061691	1.91941	0.061691	1.7034	1.92175	5.60077	0.061691	3.00616	3.78126	1.13756	7.7206	1.58672	3.17809	2.7766	7.83751	1.89112	1.32503	6.4971	4.81239	6.80719	1.56326	2.49232	2.66934	3.50398	3.14596	0.799652	1.81767	1.55875	2.77666	3.56838	2.34367	4.88523	0.968206	2.54773	2.02517	1.4257	2.42585	2.49491	2.73438	2.6813	2.31486	4.57087	2.19263	6.32381	5.08996	3.12179
gulono-1,4-lactone	Cofactors and vitamins	Ascorbate and aldarate metabolism	0.153036	0.400567	0.112815	0.817345	1.08953	0.818511	0.589851	1.04368	0.517511	0.343089	0.667687	1.0262	0.891493	1.12366	0.56366	0.688568	1.39548	0.880659	0.100508	0.456738	0.716654	0.488081	0.847579	0.441052	0.719512	0.653164	0.480494	0.911327	1.04964	0.973799	0.881311	0.560363	0.100508	0.594899	0.478815	1.25075	0.976539	0.773752	0.579457	0.808627	0.69788	0.657526	0.849363	0.610175	1.31852	0.752389	0.515048
heme	Cofactors and vitamins	Hemoglobin and porphyrin metabolism	0.018819	1.24545	0.018819	4.70898	20.2183	0.018819	0.936778	0.159308	1.37096	2.87351	0.018819	0.018819	0.018819	0.27169	15.3418	0.018819	0.261097	0.018819	1.81655	0.018819	0.018819	1	5.60176	0.018819	0.018819	0.205221	0.679694	0.607041	0.202741	7.75313	2.81873	0.018819	1.15221	0.018819	4.39183	0.018819	7.83575	1	0.018819	5.17707	0.018819	0.018819	0.018819	6.83445	7.63371	1	0.018819
hexanoylcarnitine	Lipid	Carnitine metabolism	1.11221	0.183034	0.273872	0.501088	0.385177	0.860094	0.595838	0.381883	1.27892	0.693779	1.31119	0.742168	1.4752	1.26083	0.558796	1.31429	2.87907	1.06909	1.20704	0.439818	1.61468	2.11707	1.30869	4.29899	3.02438	1.06684	0.828918	1.06932	0.536641	0.224022	0.730995	1.01604	0.811972	2.46605	0.89558	2.95812	0.395456	1.53992	0.967202	0.403635	0.614949	2.52171	2.10239	2.44789	4.23941	0.937129	0.624367
hippurate	Xenobiotics	Benzoate metabolism	0.261462	0.095778	0.182036	4.37129	0.605842	0.403627	0.744003	1.1118	0.241723	0.124209	0.032382	0.201671	0.176698	0.396804	0.699419	0.398075	0.166195	0.490268	0.163343	0.552194	0.032382	0.794333	1.72388	0.067108	0.523676	0.186225	0.327395	5.5499	0.075066	0.058769	1.08162	0.876143	0.225787	0.09249	0.506491	0.398571	0.372857	0.252545	0.163076	0.230685	0.306258	0.145114	3.60783	0.149952	0.318869	0.487391	0.301521
histamine	Amino acid	Histidine metabolism	1.52548	0.373845	0.253208	0.063524	0.063524	0.365535	0.609403	0.267394	0.063524	1.3326	2.76642	2.08439	1.56375	0.936474	1.25321	0.063524	0.063524	0.849378	1.14922	0.269129	1.78606	0.063524	1.71104	1.07593	0.910763	0.063524	2.29269	2.8971	0.93859	0.451857	2.00361	0.063524	0.270728	3.91473	0.063524	0.063524	1.99972	1.56273	0.063524	0.788069	6.25674	4.92436	0.668199	3.83137	0.063524	3.18296	1.26792
histidine	Amino acid	Histidine metabolism	0.497	0.287537	0.337548	0.552719	0.972798	0.479761	0.91509	0.530913	0.471561	0.486522	0.974152	0.578256	0.430377	0.606757	0.508796	0.423308	1.00465	0.31892	0.717138	0.420807	0.844568	1.05849	1.12764	0.833254	0.511551	0.995352	0.773085	0.888569	0.493086	0.573888	0.418976	0.669314	0.744502	0.419753	0.681798	0.38853	1.2028	0.99848	0.624165	0.674945	0.532603	1.00199	0.571023	0.751914	0.295066	0.497679	0.720775
histidylleucine	Peptide	Dipeptide	1.0818	0.95263	0.760007	0.836718	0.541991	1.12043	0.65816	0.175065	5.24737	1.78867	8.72427	1.06476	2.28477	1.31241	1.14799	0.480162	19.2576	0.90769	3.13157	3.18721	1.29444	10.3307	3.15429	5.89485	1.48204	0.174491	2.04514	2.66916	2.87254	0.679652	1.60497	2.81249	0.976452	2.67136	0.376385	8.77403	2.11216	3.26708	0.83817	0.845025	1.13596	3.38237	3.06205	1.01243	1.5924	1.25865	2.11673
histidylmethionine	Peptide	Dipeptide	0.148701	0.148701	0.148701	0.148701	0.148701	0.870107	0.148701	0.148701	0.148701	0.148701	3.20202	0.148701	0.148701	0.148701	0.148701	0.148701	9.14465	0.148701	0.950866	0.148701	0.148701	1.39007	1.1693	2.73052	0.877034	0.148701	0.148701	1.36152	0.148701	0.148701	0.148701	0.148701	0.148701	0.862812	0.23638	3.50073	0.148701	0.783953	0.148701	0.148701	0.148701	1.74629	1	1.12949	0.148701	0.148701	0.608006
histidylphenylalanine	Peptide	Dipeptide	0.177868	0.177868	0.177868	0.177868	0.177868	0.177868	0.539273	0.177868	1.80289	0.177868	4.36603	0.652369	0.733483	0.177868	0.177868	0.177868	12.2388	0.177868	2.18611	0.985655	0.941376	5.9768	0.866986	3.69828	1.2314	0.177868	1.20321	0.928577	0.963012	0.177868	0.539766	1.05673	0.177868	0.915954	0.296547	3.03319	0.177868	1.38707	0.177868	0.634592	0.177868	2.76966	1.31304	1.33272	0.566303	1.28754	1.1825
histidyltryptophan	Peptide	Dipeptide	0.207808	0.207808	0.207808	0.207808	0.207808	0.536945	0.207808	0.207808	1.34793	0.207808	6.51263	0.207808	0.919714	0.207808	0.207808	0.207808	3.10011	0.207808	1.41229	0.847186	0.207808	2.22104	0.626144	1.5933	0.453266	0.207808	0.207808	0.207808	0.905758	0.207808	0.207808	0.207808	0.355902	1.16855	0.207808	1.76557	0.207808	1	0.207808	0.207808	0.207808	1	0.779285	0.207808	0.207808	0.207808	0.69459
histidyltyrosine	Peptide	Dipeptide	0.121679	0.121679	0.121679	0.121679	0.121679	0.121679	0.121679	0.121679	1	0.121679	1.93192	0.121679	0.121679	0.121679	0.121679	0.121679	12.5259	0.121679	0.121679	0.121679	0.121679	1.40631	0.121679	0.121679	0.121679	0.121679	0.121679	0.121679	0.121679	0.121679	0.121679	1.30937	0.121679	0.121679	0.121679	1.45967	0.121679	0.121679	1.19062	0.815263	0.121679	1.33831	1.14424	0.121679	0.121679	0.121679	0.121679
homocysteine	Amino acid	Cysteine, methionine, SAM, taurine metabolism	0.152181	0.106103	0.106103	0.106103	0.380269	0.106103	0.106103	0.189487	0.106103	0.378199	0.106103	0.841757	0.106103	0.106103	0.127323	0.829054	1.4734	0.106103	1.59685	0.106103	0.836143	0.106103	0.106103	0.106103	1.00015	0.106103	0.41407	0.432395	0.750156	0.106103	0.106103	0.106103	0.221862	3.39765	0.106103	1.66008	0.730586	0.106103	0.601141	0.106103	1.70125	0.362452	1.33257	0.106103	0.106103	0.180957	0.891242
homoserine	Amino acid	Glycine, serine and threonine metabolism	0.196219	0.196219	0.196219	0.196219	0.196219	0.495235	0.196219	0.196219	0.843529	0.196219	4.48441	0.583989	0.196219	1.20654	0.709483	0.894861	2.50349	0.196219	1.21559	1.08632	0.740359	0.755212	1.2724	0.968172	0.994226	0.196219	0.885975	0.742439	1.01375	0.196219	0.196219	2.59286	0.196219	2.52576	0.954841	0.860784	0.666042	1.00504	0.964168	0.196219	0.196219	1.53862	2.21871	1.68066	0.196219	0.196219	1.53566
homostachydrine*	Xenobiotics	Food component/Plant	1.07792	0.331753	0.331753	0.331753	1.38945	0.838083	0.752766	0.365661	1.00902	1.1029	0.771933	0.331753	0.331753	1.06366	0.665168	0.862001	1.59484	1.15441	2.25313	1.34052	0.955068	0.331753	1.52386	1.42336	24.5854	0.736274	1.83886	1.86803	1	0.875273	1.01157	0.331753	0.573045	1.09159	0.625177	0.791212	0.824655	1.37271	0.473661	0.331753	0.531352	0.902836	2.66178	1.00167	1.52421	0.849853	0.910726
hydantoin-5-propionic acid	Amino acid	Histidine metabolism	1	1	1	1	1	1	1	1	1	1	1	1	1	1	1	1	1	1	1	1	1	1	1	1	1	1	1	1	1	1	1	1	1	1	1	1	1	1	1	1	1	1	1	1	1	1	1
hydrochlorothiazide	Xenobiotics	Drug	0.550686	0.550686	0.550686	0.550686	0.550686	0.550686	0.550686	0.550686	0.550686	0.550686	0.550686	0.550686	0.550686	0.550686	0.550686	0.550686	0.550686	0.550686	0.550686	0.550686	0.550686	0.550686	0.550686	0.550686	0.550686	0.550686	0.550686	0.550686	0.550686	0.550686	0.550686	0.550686	0.550686	0.550686	0.550686	0.550686	0.550686	0.550686	0.550686	0.550686	0.550686	0.550686	0.550686	0.550686	0.550686	0.550686	0.550686
hypotaurine	Amino acid	Cysteine, methionine, SAM, taurine metabolism	3.06646	0.603274	0.842279	1.00171	0.646894	1.32711	0.963838	0.900878	1.42185	0.645173	1.28261	1.60675	0.261492	4.96095	0.417701	2.2131	9.1183	1.08126	1.35492	3.95209	0.987154	0.998292	1.76511	1.68173	3.77319	0.826842	1.79378	3.53052	1.24462	0.206047	3.07834	0.972005	0.452639	2.21066	1.01275	0.394519	0.423451	2.4202	1.90223	0.699157	0.235301	1.22376	0.805537	10.639	0.62051	2.75355	1.14941
hypoxanthine	Nucleotide	Purine metabolism, (hypo)xanthine/inosine containing	0.550081	0.236593	0.368869	0.591547	0.683144	0.787952	0.68286	0.483868	0.735332	0.46294	0.766802	0.985867	0.520971	0.870504	0.513845	0.531641	0.986505	0.512309	0.665522	0.556795	0.577039	0.611382	0.646211	0.8402	0.636722	0.7102	0.943316	0.954268	0.764813	0.438858	0.372289	0.866032	0.425799	0.975066	0.678086	0.679671	0.586077	0.407798	0.86962	0.647903	0.464721	0.823469	0.780028	0.527358	0.5818	0.643166	0.588546
imidazole propionate	Amino acid	Histidine metabolism	1.18431	0.259355	0.346588	0.350184	1.14008	1	0.834283	0.259355	1.36508	0.259355	1.5258	1.16101	0.590997	1.28575	0.259355	1.37488	0.259355	0.98091	0.83318	0.806048	1.16422	0.658268	0.979119	1.52604	1.03326	0.921942	1.89044	2.59526	0.259355	0.259355	0.483468	0.586114	0.259355	0.385681	1.07628	0.97131	0.551218	2.42576	0.990497	0.259355	0.259355	0.855609	0.570275	0.847534	0.259355	0.611861	0.537555
indoleacetate	Amino acid	Tryptophan metabolism	0.069121	0.406444	0.069121	0.584227	0.069121	0.432711	0.185907	0.069121	0.069121	0.528016	0.069121	0.523308	0.408314	0.790904	0.069121	0.328109	0.069121	0.501716	0.503944	0.241898	0.713563	0.069121	0.245797	0.373578	0.360686	0.069121	0.634314	0.069121	0.069121	0.069121	0.451069	0.069121	0.358696	0.744121	0.467789	0.527865	0.122024	0.715558	0.181047	0.521171	0.069121	0.069121	0.384651	0.381487	0.804271	0.069121	0.465708
indolelactate	Amino acid	Tryptophan metabolism	0.408609	0.411478	0.135333	0.721269	0.785308	0.471655	0.581105	1.14203	0.135333	1.71681	1.61994	1.22808	0.135333	0.135333	1.6925	0.135333	0.135333	1.2218	0.135333	0.295803	0.135333	0.135333	0.135333	0.782503	1.44018	0.135333	2.16852	1.73827	1.27107	0.874005	1.48825	0.135333	1.80898	1.0524	1.65215	0.135333	1.43432	0.854589	0.650513	0.844944	1.12992	0.135333	0.135333	0.975632	0.527136	0.638887	1.22857
inosine	Nucleotide	Purine metabolism, (hypo)xanthine/inosine containing	0.999297	0.552576	0.544007	0.633951	1.06561	1.23742	1.28443	0.834588	1.14735	1.11	1.26591	1.23561	0.999723	1.08245	0.853358	1.04051	1.65335	0.94538	2.08057	1.27546	1.16154	1.54979	1.55285	1.43404	1.18645	1.1665	1.27673	1.50558	1.62286	0.501635	0.812665	1.35687	0.88858	1.32039	1.13799	1.55657	0.82679	1.0392	1.13895	1.02116	1.10286	1.50774	1.48509	1.13802	1.42128	1.32992	1.48684
inositol 1-phosphate (I1P)	Lipid	Inositol metabolism	1.30263	0.416941	1.65875	1.28255	0.746342	1.41937	2.63905	1.24795	1	1.87138	1.69718	1.23097	0.885287	1.7801	1.03173	0.876844	1.44295	0.569971	2.00324	1.94553	0.601539	1.80175	1.04048	0.909569	1.5081	1.8932	4.47649	1.02285	1.03514	1.00456	0.68377	0.729456	0.321368	0.825197	0.902973	0.589467	0.370937	0.476808	0.995442	0.609578	0.748236	0.445035	0.399925	0.390718	0.901744	0.408443	0.579777
Isobar: fructose 1,6-diphosphate, glucose 1,6-diphosphate, myo-inositol 1,4 or 1,3-diphosphate	Carbohydrate	Glycolysis, gluconeogenesis, pyruvate metabolism	1	0.361615	1.08025	0.545585	0.361615	1.61366	1.25439	0.361615	0.692494	2.50863	0.361615	12.9716	1.04174	0.493933	2.95948	2.0416	0.361615	0.490541	14.4714	0.623563	1.54218	0.361615	0.361615	0.361615	1.14986	0.361615	2.24893	1.97018	1.72036	4.32914	0.573227	0.361615	0.589459	0.615917	0.361615	0.361615	2.77359	1.16242	5.52428	1.85206	1.13801	0.607607	1	0.361615	0.484946	1.6403	0.837583
Isobar: ribulose 5-phosphate, xylulose 5-phosphate	Carbohydrate	Nucleotide sugars, pentose metabolism	1.84256	0.330114	1.05031	0.549983	0.771355	1.70909	2.92527	0.644168	1.56814	1.46191	1.24695	2.26773	1.03978	2.08584	1.0097	3.78408	2.26277	1	3.01661	1.39088	1.32493	2.20376	2.1648	1.7511	2.44245	2.2987	3.9363	3.29092	3.0783	0.25782	0.814919	1.19939	0.705918	0.934079	0.689621	0.805582	0.982281	1.30668	3.25545	1.35433	1.25715	1.03147	2.32458	1.75065	1.79633	1.17213	1.40137
isobutyrylcarnitine	Amino acid	Valine, leucine and isoleucine metabolism	0.240586	0.194692	0.176934	0.449911	0.548715	0.402046	0.584044	0.234734	0.345539	0.958373	0.450261	0.908242	0.901378	0.625923	0.645511	0.652582	8.40502	0.279831	0.739327	0.353445	1.53615	0.916762	0.648156	2.90848	10.678	0.426257	1.09068	0.207244	0.631661	0.382885	0.505805	0.409704	0.58067	1.5112	0.402628	0.63495	0.408253	0.495065	0.385475	0.543242	0.630743	0.752046	1.12453	0.427166	2.57382	0.650908	0.469794
isoleucine	Amino acid	Valine, leucine and isoleucine metabolism	0.435375	0.22265	0.185166	0.624507	0.541869	0.466299	0.296554	0.614189	0.49447	0.496462	1.03602	0.555425	0.476339	0.57996	0.433422	0.407508	1.23717	0.448309	1.19174	0.327561	0.605758	0.848457	0.724295	0.722558	0.569191	0.534908	0.893496	0.809451	0.88834	0.230893	0.400486	0.57187	0.492875	0.79672	0.509735	0.876205	0.610848	0.739509	0.507211	0.49325	0.499049	0.763626	0.916487	0.670699	0.536858	0.55622	0.64617
isoleucylalanine	Peptide	Dipeptide	0.828352	0.302913	0.450262	0.204079	0.027667	0.680912	0.027667	0.027667	2.49141	0.475156	5.89551	0.783652	0.707181	0.269206	0.350843	0.346535	7.87559	0.997656	3.76669	0.697101	0.786824	4.29719	2.4444	7.81419	1.15503	0.152365	1.19519	1.80066	2.61533	0.027667	0.333815	2.28867	0.432472	4.02066	0.99178	13.5764	0.417415	0.94065	0.299976	0.162165	0.991258	5.16589	1.58256	3.18942	0.504162	0.33654	2.33841
isoleucylarginine	Peptide	Dipeptide	0.809735	0.369264	0.687119	0.149262	0.149262	0.740853	0.149262	0.149262	1.52562	0.602357	4.20569	0.862751	0.646165	0.593048	0.149262	0.149262	19.869	0.958512	1.82683	0.518204	0.610412	1.64623	1.19104	3.40207	0.840421	0.262851	0.753601	1.14771	1.33164	0.149262	0.149262	1.17882	0.560173	1.79783	0.441689	5.38488	0.149262	0.554113	0.369637	0.149262	0.7824	2.56909	1.23172	0.810092	0.149262	0.692476	1.20031
isoleucylglutamate	Peptide	Dipeptide	0.068882	0.24061	0.068882	0.068882	0.068882	0.525622	0.068882	0.068882	2.00009	0.297934	3.45065	0.764822	0.632552	0.068882	0.36872	0.068882	11.824	0.744401	2.16987	0.439494	0.58637	1.50366	0.974421	3.31539	0.802037	0.169016	1.09956	0.068882	1.59087	0.219001	0.170117	1.65612	0.068882	3.57849	0.629373	11.3828	0.068882	0.068882	0.068882	0.068882	0.746797	2.34351	1.72026	1	0.756281	0.194534	0.869784
isoleucylglycine	Peptide	Dipeptide	0.347981	0.129198	0.271809	0.265873	0.330992	0.376107	0.117497	0.469918	1.00314	0.343697	2.81592	0.490039	0.482037	0.682204	0.353795	0.358707	11.5304	0.703627	1.49559	0.327747	0.554428	1.24037	0.981349	2.09279	0.341011	0.243929	0.996857	1.01769	0.938321	0.213929	0.120423	0.980056	0.179322	1.2715	0.388425	5.35274	0.604388	0.387814	0.227849	0.293443	0.493615	1.502	1.01466	0.67274	0.556986	0.296614	0.769121
isoleucylhistidine	Peptide	Dipeptide	0.130925	0.130925	0.272001	0.130925	0.130925	0.299976	0.130925	0.130925	0.84799	0.130925	2.04989	0.784634	0.526121	0.130925	0.130925	0.372017	10.6404	0.130925	1.1826	0.761244	0.374085	1.00591	0.852662	2.28783	0.393236	0.27591	0.638106	0.534552	0.69401	0.256355	0.130925	0.557113	0.130925	0.49542	0.130925	1.8439	0.203672	0.712861	0.43031	0.130925	0.287498	1	0.595099	0.130925	0.130925	0.130925	0.494948
isoleucylisoleucine	Peptide	Dipeptide	0.748746	0.842291	0.096653	0.096653	0.683963	1.23971	0.096653	0.096653	1.49381	1.03734	6.81514	0.681791	1.11449	0.096653	0.096653	0.096653	23.4816	0.950511	3.20676	0.642856	0.685043	4.02077	3.76388	6.92251	0.771846	0.106721	0.649741	1.0097	2.78267	0.096653	0.096653	2.64553	0.096653	4.41428	0.482238	9.7482	0.096653	0.559298	0.096653	0.096653	1.65837	4.0916	1.25123	1	1.06428	0.93481	1
isoleucylmethionine	Peptide	Dipeptide	0.059682	0.059682	0.53479	0.059682	0.059682	0.059682	0.059682	0.059682	1.66911	0.059682	13.2744	0.059682	0.988076	0.059682	0.41734	0.059682	16.4263	0.689752	3.95757	0.600379	0.613215	5.58871	2.42714	11.877	1.29281	0.092544	0.059682	0.059682	6.79017	0.059682	0.059682	1.50701	0.059682	4.77541	0.509312	21.7025	0.059682	0.059682	0.059682	0.059682	0.622697	4.84505	2.00362	1.57729	0.059682	0.059682	2.29457
isoleucylphenylalanine	Peptide	Dipeptide	0.508309	0.0156	0.0156	0.0156	0.0156	0.669944	0.0156	0.0156	1.41454	0.0156	8.20565	0.894678	1.02435	0.0156	0.0156	0.800747	8.33303	0.712914	3.51143	0.330753	0.954961	6.14305	2.54367	10.6612	2.12756	0.054421	0.50863	0.634135	4.08236	0.0156	0.0156	1.76695	0.0156	4.93234	0.651555	16.0127	0.0156	0.375475	0.452453	0.0156	0.904038	7.03531	2.63576	1.89327	0.0156	0.0156	1.61328
isoleucylserine	Peptide	Dipeptide	1.0238	0.564025	0.328862	0.335037	0.418392	1.13589	0.487383	0.258282	1.76587	0.438321	6.2138	1.11507	1.32306	0.843349	0.446609	0.62193	15.3656	1.42477	3.28653	0.663275	1.13962	2.25044	2.97021	4.82028	1.38135	0.303477	1.05345	1.23297	3.70832	0.067978	0.49036	1.85887	0.277219	6.97557	0.661743	19.1706	0.246089	0.966354	0.2332	0.347835	1.19498	3.56552	2.08324	1.36252	1.39854	0.546417	2.22133
isoleucyltryptophan	Peptide	Dipeptide	0.086901	0.086901	0.086901	0.086901	0.086901	0.086901	0.086901	0.086901	0.694597	0.346694	7.8137	0.431742	0.611601	0.086901	0.086901	0.086901	12.0152	0.086901	2.40625	0.086901	0.550504	1.53078	1.60908	3.97165	0.639921	0.086901	0.086901	1.37246	1.74256	0.086901	0.086901	1.56766	0.086901	1.92585	0.914163	7.58447	0.086901	1	0.086901	0.086901	0.086901	2.36731	1.50466	1.49282	0.086901	0.086901	0.641939
isoleucyltyrosine	Peptide	Dipeptide	0.088167	0.088167	0.088167	0.088167	0.088167	0.088167	0.088167	0.088167	0.945293	0.088167	5.94254	0.636089	1.04758	0.088167	0.974324	0.088167	5.91829	0.088167	3.09414	0.541147	0.720991	5.17477	2.96576	10.4149	1.20485	0.088167	0.088167	1.17294	3.17876	0.42153	0.088167	2.03777	0.088167	3.36245	0.867902	8.83589	0.088167	0.088167	0.600597	0.088167	0.758401	6.29108	1.52247	1.73335	0.088167	0.531244	1.58974
isoleucylvaline	Peptide	Dipeptide	0.561276	0.210962	0.497466	0.076021	0.076021	1.08306	0.076021	0.076021	2.49015	0.221021	8.4078	0.641512	0.705214	0.329751	0.146052	0.219666	13.9038	0.830253	3.60655	0.877116	0.563353	4.15786	2.82993	11.6988	1.28009	0.146314	0.892522	0.975562	4.10371	0.286166	0.076021	1.95881	0.076021	4.1857	0.388062	16.2995	0.21743	0.562665	0.321847	0.076021	0.076021	5.3993	1.93778	1	0.548504	0.304985	2.04247
isovalerylcarnitine	Amino acid	Valine, leucine and isoleucine metabolism	0.168254	0.315717	0.168254	0.552355	0.430423	0.510223	0.381408	0.341378	0.168254	0.416627	0.168254	0.602712	0.570721	0.486187	0.581674	0.530926	0.862924	0.336605	0.963205	0.446339	1.48923	0.427601	0.311038	1.01644	2.86211	0.4248	0.264823	0.23476	0.647141	0.322645	0.350493	0.437916	0.534635	3.30614	0.168254	0.312244	0.245	0.44102	0.537404	0.450505	0.461042	0.351907	1.314	0.471535	1.64312	0.315237	0.798519
kynurenine	Amino acid	Tryptophan metabolism	7.64957	0.57608	0.936762	0.550947	1.0477	1.31764	2.34775	2.14783	4.99188	3.44621	7.93979	5.79814	0.952514	3.22607	0.37838	4.83319	8.00163	2.70131	7.61886	5.64731	7.6325	16.5561	3.81964	6.453	4.91078	6.79354	1.97655	12.2518	2.15296	0.909239	0.792416	3.24779	4.11591	0.919163	5.1768	4.67501	0.662689	1.37919	4.61395	3.08234	0.517188	6.51229	2.32976	7.04044	2.99562	5.65749	9.9523
lactate	Carbohydrate	Glycolysis, gluconeogenesis, pyruvate metabolism	0.720878	0.170714	0.183687	0.411238	1.03354	0.452933	0.408322	0.236264	0.985397	0.67762	1.53893	1.05659	0.489096	1.20903	0.3688	0.948649	2.57268	0.716536	2.30146	0.339387	1.13155	1.52453	1.15853	1.44111	1.27721	0.757667	1.02385	1.73546	1.48294	0.255982	0.871562	1.33482	0.582162	2.1114	0.522345	2.59665	1.14065	0.851358	0.783212	0.409688	1.05031	1.62381	1.96431	1.65466	1.37886	0.796669	1.49614
laurate (12:0)	Lipid	Medium chain fatty acid	0.821384	3.33139	0.922496	1.48716	1.03681	1.5554	1.31649	1.93807	1.54832	1.39569	0.760377	0.864378	1.96675	0.945218	1.46291	0.990596	0.541235	2.10676	0.606674	2.08468	0.78571	1.25544	0.452908	0.79485	0.640739	1.19251	1.06188	0.581068	0.613584	1.48936	1.49082	0.491904	1.43421	0.453131	1.25819	0.554283	1.0926	1.66671	1.56437	1.33316	1.11978	0.509027	0.650454	0.895137	0.989113	1.38393	0.773155
laurylcarnitine	Lipid	Carnitine metabolism	0.790697	0.185626	0.185626	1.30632	0.562113	0.426566	0.185626	0.185626	0.958417	0.342528	0.715533	0.596631	2.2975	1.38921	0.736685	0.185626	1.34383	2.18699	0.185626	0.446557	2.25119	4.43251	1.28536	1.55285	1.13237	1.46119	1.14512	0.185626	0.599537	0.979905	0.678094	0.185626	0.788528	1.85259	0.39697	0.536629	0.185626	1.936	0.864539	0.761743	0.623022	0.59242	0.614858	2.01424	1.92123	0.185626	0.185626
leucine	Amino acid	Valine, leucine and isoleucine metabolism	0.498767	0.175996	0.20896	0.521872	0.649156	0.411617	0.361313	0.398992	0.630506	0.483969	1.14282	0.625188	0.48182	0.603996	0.357027	0.467714	1.72107	0.449379	1.38765	0.391497	0.663183	1.00853	0.664088	1.02474	0.579522	0.393963	0.931569	1.00246	0.777561	0.320705	0.361446	0.511964	0.445962	0.891972	0.518134	0.970772	0.752882	0.823793	0.563662	0.463067	0.474909	0.808312	0.934067	1.0277	0.635808	0.56353	0.633579
leucylalanine	Peptide	Dipeptide	1.08552	0.78492	0.743952	0.388855	1	0.754088	0.045644	0.045644	3.11507	0.391032	11.7446	0.704894	1.65245	0.398412	0.607018	0.694813	6.34354	0.918143	1.574	1.43053	1.00137	9.56548	3.72342	6.61651	1.83348	0.045644	0.562019	0.993521	4.60429	0.045644	1.14883	3.26101	0.839755	3.55244	1.10112	14.6685	0.599296	1.64682	0.571746	0.65802	1.09598	4.65212	1.80848	3.00849	0.85997	0.795329	2.64377
leucylarginine	Peptide	Dipeptide	0.054489	0.054489	0.471815	0.367834	0.054489	0.990314	0.054489	0.054489	2.87114	0.51644	6.92627	0.909913	1.42607	0.701765	0.583204	0.566224	14.6944	0.054489	2.24958	0.73055	0.686018	3.81939	2.12285	5.47495	0.789284	0.104106	1.04705	1.97999	1.571	0.392187	0.422615	1.49407	0.600693	2.42332	0.549537	10.6874	0.606144	1.04416	0.280478	0.054489	1.24717	4.09715	1.68948	1	0.925181	1.14259	1.5016
leucylasparagine	Peptide	Dipeptide	0.625933	0.595091	0.502711	0.824119	0.34267	1.2918	0.24574	0.108539	2.55706	0.799004	5.75782	1.3634	2.48604	0.596385	0.664872	0.912888	12.0204	1.11007	2.62566	1.22639	0.757034	4.94159	3.45215	4.51032	2.27143	0.361822	0.108539	1.3399	4.30298	0.108539	0.4979	2.47323	0.356555	4.56814	0.909588	12.5335	0.906508	0.804737	0.30733	0.108539	1.79161	3.13834	2.04517	2.21876	0.108539	0.946689	2.44825
leucylglutamate	Peptide	Dipeptide	0.878223	0.737873	0.072738	0.268636	0.072738	1.13755	0.072738	0.072738	2.9226	0.816745	6.33503	1.80482	2.36265	0.660708	0.661219	0.639729	4.90298	1.48222	5.7294	0.967634	1.39658	6.0217	3.48583	6.88123	2.47091	0.139016	1.01458	1.3839	4.42321	0.072738	0.555945	2.37311	0.523855	9.60404	1.12856	21.0628	0.072738	0.474196	0.70082	0.072738	0.965965	3.86481	3.5769	2.29849	1.23279	0.885687	2.02398
leucylglycine	Peptide	Dipeptide	1.024	0.848314	0.568422	0.29891	0.314163	1.00121	0.009027	0.009027	3.33973	0.488188	9.85835	1.4414	1.4787	0.462943	0.570416	0.87812	3.62558	1.54523	3.17262	1.46995	0.752387	4.98072	3.54428	5.40805	1.54449	0.024514	1.05642	0.873898	4.32412	0.150681	0.563674	3.23525	0.48702	4.69771	1.37675	21.4869	0.689845	1.02944	0.24196	0.252002	1.47923	4.31439	2.88906	3.85447	0.499133	0.400374	2.5385
leucylhistidine	Peptide	Dipeptide	0.976013	0.167852	0.059567	0.124674	0.059567	0.909501	0.059567	0.069152	1.50143	0.795758	5.81017	0.059567	0.956462	0.059567	0.059567	0.458077	11.5337	0.718476	2.4103	1.06145	0.526308	2.92072	1.71428	4.71954	0.792652	0.070951	1.42152	1.96346	1.5202	0.059567	0.306042	1.92927	0.45408	1.55005	0.941781	6.10041	0.829895	0.505708	0.269568	0.059567	0.623264	3.74819	1.36494	2.74913	1.09542	1	1.64474
leucylleucine	Peptide	Dipeptide	1.35828	0.868465	1.00511	0.409628	1.09563	0.90402	0.239991	0.005901	3.714	0.830765	20.4555	0.994893	2.83684	0.480556	0.555032	0.661522	3.85584	1.71419	3.65732	2.02749	0.588056	24.1167	8.01782	12.6452	3.32097	0.041789	0.776089	0.77608	8.99769	0.646954	0.762051	4.31343	0.537559	4.82029	0.945184	22.3385	0.42994	1.70321	0.56966	0.620369	1.64904	7.75672	3.49966	3.36411	0.755061	0.899979	5.48495
leucylmethionine	Peptide	Dipeptide	0.088289	0.495208	0.088289	0.088289	0.088289	0.088289	0.852002	0.088289	0.960005	0.088289	5.26855	0.088289	0.088289	0.088289	0.088289	0.088289	5.66712	0.088289	1.81146	0.088289	0.088289	3.76354	1.29807	3.56813	0.088289	0.135755	0.189044	0.088289	2.31184	0.088289	0.518705	0.676968	0.088289	1.75267	0.642638	3.87002	0.088289	0.088289	0.088289	0.088289	0.088289	2.40573	0.993131	1.0572	0.088289	0.088289	1.08597
leucylphenylalanine	Peptide	Dipeptide	0.031749	0.031749	0.031749	1.12668	0.845777	0.031749	0.500993	0.031749	0.031749	0.031749	4.9499	0.031749	0.909403	0.031749	0.031749	0.945129	4.77773	0.772887	1.60179	0.031749	0.031749	4.00368	2.56709	2.59895	1.20758	0.100477	0.031749	0.031749	2.32948	0.589744	0.031749	1.00086	0.031749	1.14161	0.777369	6.97117	0.897362	0.031749	0.031749	0.031749	0.031749	2.86415	2.0838	2.04304	0.031749	0.663602	1
leucylserine	Peptide	Dipeptide	0.035955	0.367736	0.035955	0.035955	0.035955	0.804447	0.384734	0.035955	3.23683	0.035955	7.98862	0.718468	3.30827	0.901257	0.035955	0.240785	6.07665	0.966731	2.12634	0.746154	0.877279	10.1154	4.25441	6.57587	1.40086	0.08152	0.035955	0.575916	3.6358	0.035955	0.915923	2.82239	0.035955	2.98482	0.822539	35.0867	0.035955	1	0.035955	0.617733	0.925519	4.77375	1.89882	2.94899	0.850683	0.035955	2.46618
leucyltryptophan	Peptide	Dipeptide	0.22025	0.22025	0.753792	0.627865	0.22025	1.19696	0.22025	0.22025	0.602992	0.22025	2.63704	0.22025	1.20662	0.22025	0.22025	0.22025	8.43303	0.22025	1.66886	0.986282	0.22025	1.23586	0.22025	1.2439	0.22025	0.22025	0.22025	0.608924	1.2671	0.22025	0.707828	1	0.666247	0.651791	0.480732	2.40998	0.22025	0.724916	0.82295	0.22025	0.22025	1.78357	0.609329	0.892314	0.22025	0.478818	1.94533
leucyltyrosine	Peptide	Dipeptide	0.061663	0.061663	0.061663	0.061663	0.061663	0.061663	0.061663	0.061663	0.360607	0.061663	2.99601	0.061663	0.061663	0.061663	0.061663	0.061663	5.93012	0.061663	0.061663	0.061663	0.061663	3.83301	0.061663	2.82347	0.061663	0.061663	0.061663	0.061663	1.01687	0.061663	0.061663	0.061663	0.061663	1	0.487536	1.63939	0.061663	0.061663	0.061663	0.061663	0.061663	2.14847	0.506876	0.832745	0.061663	0.061663	0.983133
lidocaine	Xenobiotics	Drug	0.273314	0.379298	0.098012	0.481179	3.49057	1.36636	0.262185	0.048401	0.439516	0.753867	3.32119	0.775156	0.253629	0.46751	1.79962	0.494586	1.14239	0.48006	4.85559	0.565503	0.529568	0.844729	1.48574	0.429365	0.545733	0.822104	0.895719	0.547391	1.12137	0.177917	1.06	2.2208	0.161492	1.00177	2.05968	1.44839	7.24656	0.641301	0.554412	0.814694	0.368659	0.227429	1.89648	0.819964	0.604151	0.224315	1.19578
linoleate (18:2n6)	Lipid	Essential fatty acid	1.44944	0.738048	1.45593	1.00333	1.19997	1.78142	2.16801	0.99427	1.76024	1.16011	2.5613	1.44511	1.38965	0.887138	0.775639	0.843198	1.07515	0.840223	0.871739	2.0217	0.899958	2.97807	0.960988	3.00109	1.62793	2.06385	2.07889	2.27801	1.42978	1.242	1.19461	2.38185	1.14114	0.893737	1.27168	0.995241	0.796369	1.79644	1.52587	0.797332	0.336372	2.33975	1.11443	1.173	1.04417	1.2192	1.98756
linolenate [alpha or gamma; (18:3n3 or 6)]	Lipid	Essential fatty acid	1.77197	0.987508	2.03465	0.873545	1.36332	3.8733	2.88401	2.23708	2.84447	1.83271	3.59829	1.60279	1.93903	0.98227	0.873607	0.891191	1.00109	0.540825	0.829625	2.056	0.937359	2.55812	1.02075	4.31952	2.74432	4.43806	3.04492	3.91748	1.01249	1.51262	1.629	2.88958	1.64199	0.892903	1.86519	2.35845	0.595167	1.44986	2.73878	0.842033	0.264921	3.86808	0.861058	1.96132	1.10303	1.96511	2.89735
lipitor	Xenobiotics	Drug	1	1	1	1	1	1	1	1	1	1	1	1	1	1	1	1	1	1	1	1	1	1	1	1	1	1	1	1	1	1	1	1	1	1	1	1	1	1	1	1	1	1	1	1	1	1	1
L-urobilin	Cofactors and vitamins	Hemoglobin and porphyrin metabolism	0.244783	0.244783	0.244783	0.244783	0.244783	0.244783	0.244783	0.244783	0.244783	0.562957	0.244783	0.244783	1.62868	0.244783	0.244783	0.244783	0.244783	0.244783	0.244783	0.244783	0.244783	0.244783	0.244783	0.244783	0.244783	0.348526	0.244783	0.244783	0.244783	0.244783	0.244783	0.244783	0.244783	0.244783	0.244783	0.244783	0.244783	0.244783	0.244783	0.244783	0.244783	0.244783	0.244783	0.244783	0.244783	0.244783	0.244783
lysine	Amino acid	Lysine metabolism	0.555517	0.397836	0.495769	0.790571	0.873512	0.769748	0.918802	0.702067	0.553491	0.48321	1.05598	0.656412	0.568054	0.595236	0.41062	0.468916	0.892324	0.595097	0.966363	0.680947	1.3453	1.3466	0.833281	1.09854	0.462698	1.20795	0.930296	1.12739	0.502196	0.376873	0.482234	0.917728	0.759658	0.700346	0.702804	0.685163	0.758143	1.36508	0.502198	0.737412	0.824449	2.47211	0.531163	0.935344	0.448364	0.683736	1.1253
lysylleucine	Peptide	Dipeptide	0.806702	0.257939	0.530171	0.317764	0.068999	1.18337	0.068999	0.068999	3.40531	0.554156	7.46764	0.839676	0.724664	0.068999	0.335511	0.316623	10.802	1.02416	3.5144	1.00421	0.745779	7.10627	3.51685	8.20544	1.33417	0.068999	1.57311	1.93115	2.48225	0.068999	0.393029	3.07203	0.471093	3.32247	0.291951	14.2038	0.333768	1.12968	0.690538	0.068999	0.832884	4.88437	2.25857	1.01214	0.64239	1.32231	1.85598
lysyllysine			0.878527	0.988979	0.702983	0.327026	1.03162	1.13639	0.719329	0.033374	1.77277	1	2.17355	1.4237	1.20723	0.696636	1.1534	0.53865	1.21684	0.033374	2.12418	1.14866	0.033374	0.033374	1.48591	1.35519	1.001	0.327901	0.557199	1.39992	1.08639	0.22576	0.916424	1.26362	1.12763	0.805534	1.92106	2.48845	1.04051	1.5424	0.674238	0.049924	0.760609	0.437548	1.17956	0.033374	1.17157	1.41294	0.45064
lysylmethionine	Peptide	Dipeptide	0.20093	0.20093	0.20093	0.527052	0.20093	0.20093	0.20093	0.20093	0.20093	0.20093	1.9773	0.20093	0.20093	0.20093	0.20093	0.20093	8.27241	0.20093	0.20093	0.20093	0.20093	1.3589	1.07861	2.51289	0.20093	0.20093	0.20093	0.20093	0.876456	0.20093	0.20093	0.20093	0.288926	0.820339	0.460228	2.45555	0.20093	0.20093	0.20093	0.20093	0.20093	1.63844	0.879338	0.855221	0.20093	0.20093	0.20093
lysyltyrosine	Peptide	Dipeptide	0.735178	0.058918	0.763264	0.058918	1.23005	1	0.366586	0.058918	2.26935	1.66041	4.67647	1.56432	1.94951	1.04647	1.18806	0.493066	4.61949	0.475598	1.87955	2.25267	0.857407	2.12968	2.59065	3.63093	1.84994	0.11476	1.30746	1.39997	0.613999	1.01549	1.17477	1.24887	0.721482	10.2685	1.38398	35.5916	1.30568	2.58099	0.893307	0.659182	1.20151	3.77201	17.0814	1.3978	0.768459	0.890151	19.0904
malate	Energy	Krebs cycle	0.64766	0.084614	0.138062	0.365795	0.749846	0.57277	0.732241	0.245638	0.491141	0.215787	0.225113	1.04228	0.156647	0.983946	0.278157	0.40595	0.620931	0.799789	0.898484	0.302285	1.13736	1.53421	1.36576	0.903229	0.282589	0.50732	0.944095	1.0811	0.168971	0.091509	0.165482	0.868789	0.412657	0.082221	0.471069	0.166273	0.291695	0.403697	0.683251	0.196716	0.157663	1.08024	0.869313	0.539843	0.539488	0.607141	1.85453
malonylcarnitine	Lipid	Fatty acid synthesis	0.280156	0.315674	0.095603	0.39516	0.441719	0.095603	0.795392	0.291611	0.769237	0.212064	0.419335	0.686834	0.186907	0.644139	0.095603	0.686463	1.34906	0.465969	1	0.351577	0.288539	0.095603	0.815681	1	0.384265	0.327853	0.769114	0.707587	0.66529	0.318555	0.256981	0.362121	0.095603	0.536771	0.095603	0.095603	0.095603	0.440436	0.521498	0.313231	0.095603	0.675546	0.889315	0.412763	0.578314	0.537427	0.382471
maltohexaose	Carbohydrate	Fructose, mannose, galactose, starch, and sucrose metabolism	0.458324	0.458324	0.458324	0.458324	0.458324	0.458324	0.458324	1.21899	0.458324	1.05276	1.13111	1	0.458324	0.458324	0.899535	5.09014	1.34408	0.458324	0.458324	1.0189	0.458324	0.458324	0.458324	0.458324	0.922428	0.970443	0.6955	0.458324	0.458324	1.07802	1.01404	0.458324	1.23703	0.458324	2.42408	0.458324	0.786786	0.458324	0.458324	1	0.458324	0.458324	0.458324	4.22784	0.458324	0.458324	0.458324
maltopentaose	Carbohydrate	Fructose, mannose, galactose, starch, and sucrose metabolism	0.164616	1	0.164616	0.164616	0.164616	0.164616	0.164616	1.07518	0.164616	0.890906	1.84133	0.593183	0.164616	1.33768	1.45157	3.73752	1.61354	0.164616	0.164616	1.02198	0.164616	0.164616	0.164616	0.453395	0.941872	1	0.873056	0.164616	0.164616	1.39483	1.10705	0.164616	0.849897	0.164616	4.27447	0.164616	0.56279	0.415723	0.164616	1.10133	1.85846	0.164616	1.05813	5.48405	0.164616	0.164616	0.403313
maltose	Carbohydrate	Fructose, mannose, galactose, starch, and sucrose metabolism	2.0697	3.52374	0.22334	2.74804	1.53887	2.15547	1.88424	1.66792	1.27107	1.82543	4.03996	2.05033	1.36331	4.59356	1.25743	11.6917	2.38877	2.94506	0.873559	2.44818	2.32959	1.16094	0.557767	4.70349	5.43022	2.89369	6.75544	0.854485	1	0.987868	1.93132	0.505535	1.85091	0.399666	1.98134	1.0921	1.47185	4.30254	1.20159	1.35532	1	0.653647	2.84007	3.03614	2.09108	1.25688	2.80315
maltotetraose	Carbohydrate	Oligosaccharide	1.91534	3.24543	0.046362	2.12816	0.956779	1.25268	0.997684	2.29489	0.6722	15.1269	6.46885	5.28375	2.95293	2.31037	10.7212	17.9469	2.07734	1.68311	1.04897	3.27688	2.51129	1.18608	0.496216	2.05417	3.72524	1.62511	11.5976	0.855308	0.556499	13.4267	13.7465	0.288818	5.26896	1.12921	7.26957	3.521	10.7397	1.18896	1.02398	13.4369	3.9857	0.594078	5.76159	7.1539	2.92929	1.39994	1.73213
maltotriose	Carbohydrate	Fructose, mannose, galactose, starch, and sucrose metabolism	1.43805	5.67818	0.209157	1.15718	0.51802	1.01042	1.20085	1.59693	0.2342	6.98767	12.5342	4.03306	2.946	3.66292	6.77268	19.1735	1.77736	0.673589	1.6968	4.42851	1.96918	0.494915	0.190316	4.14969	6.61957	2.22585	4.88822	0.540172	0.569157	6.04669	11.0767	0.170061	2.81385	1	4.16821	0.942107	4.21687	2.03879	1.8809	8.15515	3.22337	0.507666	5.57857	2.60161	1.05789	0.879829	2.62147
mannose	Carbohydrate	Fructose, mannose, galactose, starch, and sucrose metabolism	0.754407	0.1687	0.17538	0.603024	0.223427	0.678135	0.513833	0.2441	1	0.264937	2.22371	1.11462	0.375972	1.19295	0.30014	1.00126	6.06675	0.44541	2.24783	0.320293	1.03703	1.64969	2.21712	2.67801	1.44429	0.745261	1.93068	2.19863	1.55003	0.113624	0.241743	1.82479	0.579163	0.913297	0.570027	5.33551	0.564694	0.683552	0.786718	0.332287	0.479703	4.60361	4.48026	2.30169	1.23785	0.578838	3.75619
mannose-6-phosphate	Carbohydrate	Fructose, mannose, galactose, starch, and sucrose metabolism	2.38849	0.365131	1	0.779108	1.07429	2.05258	1.48484	0.333619	1.02378	0.849616	2.48914	3.65552	1	2.49055	1	1.08295	4.79819	0.711553	14.7016	1.27767	4.41398	5.77711	6.22425	3.28487	2.76568	1.75796	5.92809	18.2509	8.67104	0.48853	0.88969	4.69508	0.852196	2.34348	1.02743	5.4533	1.09562	1	5.32862	1.28574	0.087286	3.19724	5.11952	2.46962	4.21803	4.71492	6.47372
margarate (17:0)	Lipid	Long chain fatty acid	1.54544	0.853524	1.25081	0.792109	0.827447	1.31418	1.88049	0.796513	1.61216	1.209	1.39495	1.00858	1.40221	0.68659	0.983386	0.908181	0.906092	0.747371	1.31259	0.888822	0.564326	1.30486	0.48063	2.48875	1.23389	1.42052	1.50094	1.48891	1.24913	1.22709	1.00124	1.95807	1.2044	1.0609	1.36945	1.08057	0.771996	1.31186	1.45529	1.06078	0.597262	1.50347	0.805353	1.11977	1.35065	1.07835	1.4217
metformin	Xenobiotics	Drug	0.491701	0.491701	0.491701	0.491701	0.491701	0.491701	0.491701	0.491701	0.491701	0.491701	0.491701	0.491701	0.491701	0.491701	0.491701	0.491701	0.491701	0.491701	0.491701	0.491701	0.491701	0.491701	0.491701	0.491701	0.491701	0.491701	0.491701	0.491701	0.491701	0.491701	0.491701	0.491701	0.491701	0.491701	0.491701	0.491701	1.12924	0.491701	0.491701	0.491701	0.491701	0.491701	0.491701	0.491701	0.491701	0.491701	0.491701
methionine	Amino acid	Cysteine, methionine, SAM, taurine metabolism	0.36014	0.170772	0.208015	0.509683	0.491389	0.505146	0.349292	0.380765	0.677762	0.359792	0.997707	0.574345	0.484065	0.639075	0.348066	0.40659	1.45902	0.435179	1.2982	0.333224	0.538094	0.979242	0.638295	1.09755	0.535316	0.408681	0.909163	0.896749	0.725083	0.211568	0.302563	0.473918	0.408789	0.679684	0.702191	1.09084	0.554566	0.610477	0.496779	0.418513	0.426952	0.779144	0.715776	1.02973	0.534683	0.548541	0.441176
methionylalanine	Peptide	Dipeptide	0.035118	0.035118	0.035118	0.437645	0.035118	0.035118	0.035118	0.035118	0.959944	0.035118	2.4721	0.035118	0.035118	0.035118	0.035118	0.035118	6.91307	0.035118	1.48547	0.035118	0.035118	4.52108	1.05264	4.21634	0.035118	0.04452	0.035118	1	0.952272	0.035118	0.035118	0.621465	0.035118	2.55541	0.921286	16.0316	0.035118	0.035118	0.035118	0.035118	0.035118	3.25056	0.941653	4.21909	0.035118	0.035118	1.04773
methionylasparagine	Peptide	Dipeptide	0.176708	0.176708	0.176708	0.176708	0.176708	0.176708	0.176708	0.176708	0.731028	0.176708	1.63497	0.176708	0.176708	0.176708	0.176708	0.176708	7.56205	0.176708	0.974909	0.317916	0.847387	0.923491	0.176708	1.9925	0.94335	0.188206	0.176708	0.798964	1.22443	0.176708	0.176708	0.176708	0.691303	2.13573	0.712437	4.32909	0.176708	0.176708	0.606492	0.176708	1.20004	1.35816	0.863968	1.58308	0.176708	0.176708	0.176708
methionylaspartate			0.138835	0.138835	0.138835	0.138835	0.138835	0.641023	0.138835	0.138835	1.52875	0.138835	1.72955	0.138835	0.138835	0.138835	0.138835	0.138835	4.48776	0.138835	1.75864	0.138835	0.138835	1.78513	0.958502	2.1793	0.138835	0.147574	0.138835	0.138835	1.27577	0.138835	0.410112	0.833326	0.138835	2.62143	0.555446	3.12752	0.138835	0.138835	0.138835	0.138835	0.541522	1.80176	0.138835	1.3758	0.911568	0.138835	0.138835
methionylglutamate	Peptide	Dipeptide	0.129461	0.526854	0.129461	0.741296	0.129461	0.129461	0.129461	0.129461	0.745057	1.06829	2.78174	0.692912	1.03352	0.608079	1.51756	0.129461	6.64047	0.129461	2.20225	0.617629	0.687511	1.07931	1.37528	1.23498	1.41332	0.129461	1.05517	0.129461	1.03458	0.129461	0.129461	0.840098	0.606087	1.79854	0.487447	6.82717	4.02479	1.03526	0.129461	0.129461	2.58675	1.40876	2.63365	1.58604	0.129461	0.88697	1.42248
methionylglycine	Peptide	Dipeptide	0.79033	1	0.513948	0.101243	0.101243	0.596767	0.101243	0.101243	1.20572	0.101243	4.55103	0.101243	0.839519	0.101243	0.446407	0.101243	8.64339	1.14145	1.00034	0.101243	0.777496	2.6961	1.33609	3.02977	0.876379	0.168715	0.528564	0.513139	1.84403	0.498733	0.528955	2.05689	0.101243	3.11188	0.675643	12.6148	0.101243	0.502493	0.101243	0.101243	0.834867	2.10799	1.62049	1.23944	0.101243	0.828271	1.36472
methionylleucine	Peptide	Dipeptide	0.520975	0.778295	0.074578	0.074578	0.074578	0.074578	0.074578	0.074578	1.21972	0.074578	5.02024	0.074578	0.074578	0.074578	0.074578	0.074578	7.11591	0.074578	1.0392	0.882521	0.074578	5.05496	1.4044	4.37086	0.646352	0.091149	0.074578	0.074578	2.74745	0.074578	0.074578	1.1003	0.074578	3.12327	0.563611	16.5737	0.074578	0.074578	0.074578	0.074578	0.074578	3.59025	1.7627	1.57387	0.074578	0.620267	2.21609
methionylphenylalanine	Peptide	Dipeptide	0.041236	0.973859	0.041236	0.041236	41.7189	1.07784	0.041236	0.041236	0.595998	0.584401	1.53055	0.041236	0.041236	0.988787	0.534846	0.041236	2.36786	0.041236	0.041236	1.02614	1.01005	2.61959	1.32052	1.26284	0.041236	0.062308	0.041236	0.041236	0.926829	0.408299	0.868318	0.041236	0.041236	0.041236	7.33438	1.45606	0.041236	0.041236	0.802542	0.785374	0.041236	0.711162	0.041236	3.74269	0.041236	0.041236	0.74232
methyl-alpha-glucopyranoside	Xenobiotics	Chemical	0.686789	0.605744	0.538932	1.66785	1.08374	1.84422	1.44416	1.27344	1.66398	1.80962	7.84665	10.3902	1.48949	4.92727	1.37487	3.07717	14.2275	1.51148	16.1269	2.92449	9.52583	4.20638	2.46358	5.84669	1.93928	4.49574	3.22007	6.24735	17.4824	0.743007	1.37566	3.70171	1.2016	4.35565	1.10728	5.02972	0.997239	3.81134	3.65311	2.17054	1.55921	3.56681	2.42905	1.62382	1.40773	1.43326	4.36068
methylglutaroylcarnitine	Amino acid	Valine, leucine and isoleucine metabolism	0.586803	0.20674	0.20674	0.462073	1.80983	0.89236	0.349437	0.20674	0.20674	0.20674	1.59235	3.20061	0.241019	0.20674	0.20674	0.20674	0.20674	0.20674	0.523572	0.20674	0.20674	0.610473	1.03364	59.994	0.20674	0.216697	0.20674	71.0669	0.382314	4.00279	1.02236	6.81629	0.430734	0.318251	0.20674	0.20674	0.20674	0.252541	0.20674	0.20674	0.20674	0.77631	0.406302	0.20674	0.20674	0.20674	0.268745
methylphosphate	Nucleotide	Purine and pyrimidine metabolism	0.427081	0.275812	0.222796	0.566151	0.682016	1.03429	0.992222	0.315167	0.822048	0.659253	1.10078	1.97693	1.05371	2.10696	0.646184	0.650158	0.596967	0.784768	1.77892	0.714759	1.41721	0.946285	1.0633	1.97251	0.440726	1.142	1.00222	1.8449	1.25032	0.216027	0.636906	1.21285	0.573732	0.691588	1.04771	3.70351	0.782163	1.1737	1.26237	1.14622	1.01921	1.58271	1.38985	1.19355	1.59547	1.33277	1.63319
metoprolol	Xenobiotics	Drug	0.188786	0.188786	0.188786	0.188786	0.188786	0.188786	0.188786	0.188786	0.874398	0.188786	0.188786	0.188786	0.188786	0.188786	0.188786	0.188786	0.188786	0.188786	0.188786	0.188786	0.188786	1.29474	0.188786	0.188786	0.188786	0.188786	0.188786	0.188786	0.188786	0.188786	0.188786	0.188786	0.188786	0.188786	0.188786	0.188786	0.560317	3.40777	0.188786	0.188786	0.188786	0.188786	0.188786	0.188786	2.92623	0.188786	0.188786
metoprolol acid metabolite*	Xenobiotics	Drug	0.040547	0.040547	0.040547	0.040547	0.040547	0.040547	0.040547	0.040547	0.366141	0.040547	0.040547	0.040547	0.040547	0.040547	0.040547	0.040547	0.040547	0.170351	0.040547	0.040547	0.040547	0.257253	0.040547	0.040547	0.040547	0.040547	0.040547	0.040547	0.040547	0.040547	0.040547	0.040547	0.040547	0.040547	0.040547	0.040547	0.328146	1.59267	0.040547	0.040547	0.040547	0.040547	0.040547	0.040547	0.712511	0.040547	0.040547
myo-inositol	Lipid	Inositol metabolism	0.22949	0.330441	0.290781	0.893873	0.122403	0.716094	0.298788	0.879455	0.147653	0.273045	0.266049	0.234632	0.598423	0.537651	0.392378	2.27983	0.949512	0.675974	1.00495	0.071486	0.330971	0.363588	0.246622	0.329819	0.371181	0.309645	0.224366	0.183327	3.18824	0.148168	0.149468	0.592474	0.101611	1.53823	0.306594	3.07652	0.201121	0.436263	0.689008	0.397716	0.344152	0.164508	0.952031	0.137593	1.55093	0.100181	0.567218
myristate (14:0)	Lipid	Long chain fatty acid	1.15887	1.14864	0.791692	1.03923	1.27842	1.51639	1.58781	1.1542	1.52417	1.09179	1.23524	0.89916	1.52459	0.851925	0.897261	0.891604	0.723624	0.998704	0.820047	1.33331	0.630983	1.58518	0.472622	1.75291	0.898693	1.427	1.54535	0.994666	1.02544	1.19592	1.26624	0.951548	1.32775	0.804407	1.2993	0.83765	0.908629	1.51996	1.44768	1.17216	0.597031	1.16477	0.740613	0.945134	1.20108	1.23558	1.17179
myristoleate (14:1n5)	Lipid	Long chain fatty acid	1.16083	1.0551	0.953735	1.00149	0.844775	1.01411	0.753665	0.799237	1.33518	0.632782	1.07826	0.768777	1.22287	0.541918	1.04535	0.781178	0.782008	0.635623	0.660783	1.32915	0.587396	1.68773	0.992976	2.31226	1.00715	1.40263	1.17687	1.17098	1.07791	0.784676	0.973197	1.19041	0.893505	0.758507	0.912801	0.714867	0.682723	1.40976	1.2442	0.685926	0.469655	0.782757	0.856805	0.893084	0.813046	0.892855	0.535531
myristoylcarnitine	Lipid	Carnitine metabolism	2.38616	0.823253	0.575168	1.52618	0.742592	0.703902	0.458395	0.222891	1.86216	1.23914	0.098264	1.31076	1.94191	1.26804	0.891387	0.511356	2.83027	2.94067	0.717824	0.36469	3.95849	9.15634	1.30655	2.25691	1.78631	1.89777	2.01811	0.098264	2.13395	0.395197	1.23859	0.098264	0.917813	7.30696	1.41347	0.577982	0.592651	5.54863	2.78208	0.852124	2.39691	1.56544	1.02821	9.77311	2.48638	1.16473	0.443169
N1-Methyl-2-pyridone-5-carboxamide	Cofactors and vitamins	Nicotinate and nicotinamide metabolism	0.637778	0.310112	0.354414	0.938604	1.20704	0.722095	0.450646	0.583969	0.561539	1.14503	0.745577	1.11972	0.56897	0.541068	0.89571	0.544442	0.204582	0.704247	0.953826	0.553972	0.6485	1.06665	0.204582	1.28914	0.672745	0.664478	0.983321	0.959503	0.204582	0.615964	0.581583	0.431297	0.848401	1.083	0.690022	0.616561	1.66452	0.537722	0.511594	0.894586	0.732395	0.442932	1.40599	0.204582	1.39083	0.606552	0.708156
N1-methyladenosine	Nucleotide	Purine metabolism, adenine containing	0.561905	0.480953	0.211155	0.920831	0.857022	0.402197	0.211155	0.796024	0.211155	0.392072	0.211155	0.341981	0.358173	0.658592	0.312838	0.211155	0.211155	0.211155	0.435646	0.264989	0.464849	0.592599	0.211155	0.490637	0.480717	0.409124	0.649019	0.211155	0.42986	0.510076	0.211155	0.211155	0.211155	0.543123	0.734232	0.211155	0.938867	0.211155	0.211155	0.269069	0.603877	0.867946	0.511409	0.532179	0.211155	0.345579	0.397858
N1-methylguanosine	Nucleotide	Purine metabolism, guanine containing	0.423461	0.109713	0.45037	0.306721	0.109713	0.109713	0.109713	0.109713	0.109713	0.109713	0.376228	0.396937	0.109713	0.335745	0.109713	0.262899	0.109713	0.109713	0.528171	0.109713	0.109713	0.255894	0.109713	0.307008	0.467286	0.203473	0.240033	0.357642	0.109713	0.417583	0.109713	0.109713	0.436574	0.668494	0.109713	0.109713	0.109713	0.301983	0.458968	0.203925	0.300839	0.109713	0.435911	0.109713	0.109713	0.236379	0.109713
N2,N2-dimethylguanosine	Nucleotide	Purine metabolism, guanine containing	0.175575	0.175575	0.586394	0.592755	0.175575	0.175575	0.175575	0.175575	0.175575	0.175575	0.175575	0.175575	0.175575	0.175575	0.175575	0.175575	0.175575	0.175575	0.175575	0.175575	0.175575	0.34146	0.472437	0.175575	0.175575	0.175575	0.175575	0.175575	0.175575	0.175575	0.175575	0.175575	0.414063	0.175575	0.175575	0.175575	0.38652	0.175575	0.175575	0.175575	0.175575	0.175575	0.175575	0.175575	0.175575	0.421514	0.27711
N2-acetyllysine	Amino acid	Lysine metabolism	1.08641	0.529831	0.523428	1.214	0.623873	2.75921	4.04695	2.26313	0.619222	0.246205	0.326806	1.27083	0.105437	1.13382	0.199677	0.461934	0.07528	1.02739	0.540216	1.13376	13.6936	1.51127	2.2612	0.466938	0.223271	7.4729	1.10613	7.99499	0.171871	0.109107	0.121837	2.18805	1.13153	0.267412	1.73998	0.07528	0.389984	2.20701	0.725051	1.91669	0.11397	24.6439	0.630924	0.814269	0.550157	1.68461	8.75677
N2-methylguanosine	Nucleotide	Purine metabolism, guanine containing	0.123664	0.123664	0.123664	0.587337	0.123664	0.473173	0.123664	0.123664	0.123664	0.123664	1	0.123664	0.123664	0.665841	0.123664	0.123664	0.123664	0.123664	0.229655	0.123664	0.514888	0.346368	0.123664	0.123664	0.750016	0.325672	0.345639	0.123664	0.561243	0.123664	0.123664	0.123664	0.123664	1.42971	0.123664	0.580216	0.123664	0.123664	0.533754	0.123664	0.824285	0.123664	0.993375	0.123664	0.553001	0.123664	0.615897
N6-acetyllysine	Amino acid	Lysine metabolism	0.215446	0.30743	0.481322	0.934215	0.844955	0.665611	0.535288	0.874026	0.921485	0.351575	0.78961	1.05501	0.335454	0.557686	0.683038	0.873197	0.533801	0.711294	0.795385	0.658942	0.690671	0.619541	0.538453	0.563701	0.42717	0.593266	0.846987	0.481129	0.551859	0.388771	0.398955	0.402868	0.569861	0.591091	0.561375	0.825177	0.44102	0.817333	0.599615	0.424247	0.739698	0.566663	0.308469	0.577503	0.359916	0.34766	0.376275
N6-carbamoylthreonyladenosine	Nucleotide	Purine metabolism, guanine containing	0.434904	0.36393	0.36393	0.36393	0.36393	0.36393	0.36393	0.36393	0.36393	0.36393	0.36393	0.36393	0.36393	0.36393	0.36393	0.36393	0.36393	0.36393	0.36393	0.36393	0.36393	0.36393	0.36393	0.36393	0.36393	0.36393	0.36393	0.699222	0.36393	0.36393	0.36393	0.36393	0.36393	0.714917	1.471	0.800892	0.36393	0.36393	0.557512	0.36393	0.36393	0.36393	0.409353	0.36393	0.36393	0.36393	0.36393
N-6-trimethyllysine	Amino acid	Lysine metabolism	1.02432	0.465954	0.192945	0.646639	0.852998	0.752556	1.08888	0.475343	0.638312	0.281888	0.645438	0.595623	0.358811	0.623163	0.339726	0.529649	0.804257	0.994884	0.667431	0.314086	1.24442	1	0.990126	1.01379	0.481213	0.509911	0.722512	0.975677	0.494169	0.448828	0.526235	0.947467	0.98621	1.0387	0.854335	0.627646	0.673705	0.970701	0.85812	0.607546	1.32103	1.79763	0.584088	1.41205	0.576743	0.766191	1.43157
N-acetylalanine	Amino acid	Alanine and aspartate metabolism	0.374425	0.236249	1.12825	0.702323	0.67623	0.52273	0.269015	0.897784	0.807769	0.537269	1.09629	0.541615	0.929474	0.764504	0.787788	0.387108	1	0.675317	0.968389	0.231093	0.520528	0.913221	0.409562	0.858741	0.404279	0.525843	0.678318	0.825446	0.792998	0.379664	0.429728	0.670062	0.603089	1.17669	0.709633	0.589546	0.833287	0.38387	0.567727	0.84715	0.231093	0.619501	0.567023	0.231093	0.435178	0.4809	0.521142
N-acetylarginine	Amino acid	Urea cycle; arginine-, proline-, metabolism	2.19452	0.885394	0.520727	0.757808	1.01546	2.37412	3.34847	0.849882	0.223392	0.223392	0.223392	2.79544	0.223392	0.984544	0.223392	0.460042	0.223392	0.536356	0.223392	0.808762	13.7232	2.6562	3.90715	0.562167	0.223392	2.37271	0.656429	7.28991	0.223392	0.223392	0.223392	1.5643	1	0.223392	0.81234	0.223392	0.223392	3.69783	1.79171	2.7775	0.223392	11.9466	1.00366	0.523293	0.223392	2.73108	17.1465
N-acetylasparagine	Amino acid	Alanine and aspartate metabolism	0.890495	0.308272	0.335048	0.446808	0.608582	1.8263	1.50457	1.70246	1.45752	1.24931	1.49667	2.13611	0.422121	1.89971	0.538159	0.31906	1.66816	0.885518	0.98645	2.10888	5.06344	1.5784	1.73291	1	1.05023	4.10502	5.38151	6.06799	0.225929	0.324168	0.270285	0.790233	1.13962	0.165442	1.78061	0.165442	1.64997	3.57681	1.65638	0.73561	0.165442	15.5948	2.26037	0.731451	1.2049	0.820979	3.64309
N-acetylaspartate (NAA)	Amino acid	Alanine and aspartate metabolism	0.218359	0.118297	0.184495	0.61091	0.277652	0.647153	0.397446	0.63835	0.256412	0.233945	0.201291	0.610315	0.451083	0.49121	0.459949	0.169321	0.372924	0.102966	0.246279	0.148702	0.352859	0.271475	0.485798	0.326777	0.318945	0.310647	0.18408	0.283412	0.300535	0.29136	0.342511	0.395125	0.322774	0.79221	0.278828	0.129758	0.162013	0.086807	0.603363	0.625162	5.44524	0.536116	0.340095	0.215158	0.202443	0.30607	0.111299
N-acetyl-aspartyl-glutamate (NAAG)	Amino acid	Glutamate metabolism	0.351441	0.184622	0.085099	0.243726	0.085099	0.694249	0.085099	0.085099	0.168257	0.20731	0.085099	0.333766	0.149772	0.365373	0.085099	0.115253	0.085099	0.085099	0.085099	0.085099	0.085099	0.085099	0.085099	0.085099	0.085099	0.085099	0.085099	0.241686	0.085099	0.433624	0.085099	0.373688	0.334448	0.606344	0.085099	0.085099	0.085099	0.085099	0.085099	0.085099	4.67999	0.085099	0.085099	0.085099	0.085099	0.327434	0.144837
N-acetylglucosamine	Carbohydrate	Aminosugars metabolism	0.410783	0.122553	0.255035	1.04271	0.382443	0.248802	0.469085	0.28121	0.119836	0.186137	0.119836	0.864423	0.95729	0.119836	0.464283	0.119836	0.119836	1.90195	0.193663	0.57843	0.885238	0.119836	0.119836	0.119836	0.652803	0.119836	0.119836	0.948708	0.119836	0.162762	0.442873	0.119836	0.448578	0.119836	0.119836	0.119836	0.310666	1.00269	0.119836	1.43186	0.377562	2.08612	0.119836	0.855195	0.119836	0.306651	0.119836
N-acetylglucosamine 6-phosphate	Carbohydrate	Aminosugars metabolism	1.45767	0.557312	0.666234	0.968976	0.509454	1.06303	1.13695	0.629014	1.28968	0.991248	2.03393	1.47263	0.888988	0.814598	0.586905	0.71074	5.57005	0.983268	2.06819	1.42072	2.5781	3.63389	2.06547	2.75835	1.7382	1.59575	1.86098	1.9466	2.74896	0.509095	0.964033	1.58504	1.09839	1.26367	0.650667	0.905316	0.615263	2.52938	1.73458	1.0883	0.202101	2.39916	1.62463	0.734454	1.71688	0.805309	1.92542
N-acetylglutamine	Amino acid	Glutamate metabolism	1.36367	0.85295	1.06377	1.12824	0.992817	4.59354	4.00697	2.71233	3.85147	1.58899	1.7436	6.88291	0.752048	3.81087	0.979551	0.991587	1.6695	2.37346	2.87154	2.95689	21.9017	7.17407	3.53826	1.86586	2.5054	12.6512	15.4133	7.71019	0.77573	0.583084	0.639023	1.59292	2.14181	0.57803	2.09186	0.916543	1.32053	3.57419	5.26464	3.18325	0.224839	40.0224	4.41587	2.76524	2.61641	1.52724	12.0473
N-acetylglycine	Amino acid	Glycine, serine and threonine metabolism	0.585132	0.532098	0.203561	0.69247	1.05784	0.629877	0.666546	0.972896	0.567783	0.964757	2.76526	1.46146	0.565215	1.19587	0.567257	1.02646	2.03648	0.608223	2.22476	0.685699	0.557293	1.39059	1.088	2.25238	0.863738	0.682004	1.93095	1.07873	1.07773	0.664444	0.475487	0.9056	1	1.37439	1.03001	1.89309	0.867915	1.18859	0.627337	0.363575	0.731517	1.52596	0.671988	1.43826	0.730694	0.842781	0.942751
N-acetylisoleucine	Amino acid	Valine, leucine and isoleucine metabolism	1	0.373862	1.3195	0.70383	1.00725	1.01714	0.874735	0.373862	0.373862	0.373862	1.46591	1.57145	1.06057	0.373862	1.0644	0.373862	1.15618	0.384188	1.03403	0.373862	1.213	1.09922	0.373862	0.799212	0.497411	0.373862	1.08094	0.840795	0.373862	0.544842	0.373862	0.373862	0.840932	0.818017	0.373862	0.373862	0.691101	0.98707	1.05372	0.97869	0.373862	2.51053	1.88975	0.373862	0.373862	0.626336	1.24957
N-acetylleucine	Amino acid	Valine, leucine and isoleucine metabolism	0.236701	0.236701	0.809421	0.6044	0.236701	0.390519	0.458289	0.65109	1.15989	0.992815	1.70909	1.38032	0.236701	0.716831	0.236701	0.876055	1.36653	1.30192	1.08316	0.735092	4.34294	2.54541	1.04227	0.516437	0.425921	0.78354	3.16743	2.12814	0.236701	0.770159	0.236701	0.688754	0.90236	0.236701	0.634957	0.236701	0.421817	1.38992	1.44821	0.688897	0.236701	5.07313	1.82289	1.11226	0.998065	0.236701	2.28813
N-acetylmethionine	Amino acid	Cysteine, methionine, SAM, taurine metabolism	1.15176	0.532301	0.593729	0.243415	1.16579	0.780801	0.803544	0.670905	1.36139	0.863504	3.27624	1.84889	1.14362	2.05959	0.981867	1.12444	6.4179	0.942741	6.25061	0.845022	2.16872	2.03404	1.46226	2.44536	1.37749	0.507067	1.07665	2.82175	1.90609	1.82532	1.08936	2.30004	0.710112	5.14222	0.820268	4.3724	2.37239	1.01095	0.940712	1.40111	1.26427	1.35579	1.78845	0.512749	1.64065	0.98868	1.01987
N-acetylneuraminate	Carbohydrate	Aminosugars metabolism	1.5579	0.805223	0.977315	1.48149	3.76421	2.15953	1.88313	1.33383	2.70064	3.02905	1.01194	5.17636	1.70941	1.65853	1.53259	1.71893	2.67636	2.31589	0.690307	3.74254	4.33639	6.46777	8.3811	2.36582	1.71908	1.39745	1.60111	1.16896	2.35876	1.50847	1.16839	1.25002	2.25066	1.50442	1.74663	1.07111	2.0815	5.34549	1.82935	2.05456	0.520992	4.51146	0.999946	1.33504	1.41082	2.23344	7.58072
N-acetylornithine	Amino acid	Urea cycle; arginine-, proline-, metabolism	0.841645	0.153117	0.444565	0.950192	0.704929	0.496554	3.36143	0.799289	2.22757	1.25561	0.944031	0.866413	1.12472	0.478442	0.952898	1.89599	0.153117	1.38988	0.540536	0.380091	0.985895	3.4036	1.26011	0.876768	14.8146	0.925978	0.719815	0.810841	0.50415	1.27952	2.02061	0.986318	2.65737	0.586372	1	0.806322	1.61442	2.57957	1.9245	1.29693	2.29338	0.519634	0.153117	4.58221	1.01475	0.968788	1.21553
N-acetylphenylalanine	Amino acid	Phenylalanine & tyrosine metabolism	0.305394	0.305394	0.305394	0.892954	0.305394	0.305394	0.305394	0.305394	0.947973	0.305394	2.20386	0.305394	0.305394	0.305394	0.305394	0.305394	0.305394	0.305394	0.756854	0.946606	1.40704	0.98127	0.305394	0.305394	0.305394	0.305394	0.889985	0.741376	0.305394	0.630183	0.631302	0.305394	0.305394	0.305394	0.305394	0.305394	0.305394	5.36486	0.563004	0.305394	0.305394	0.305394	0.61656	0.305394	0.305394	0.305394	2.82689
N-acetylserine	Amino acid	Glycine, serine and threonine metabolism	0.433672	0.244116	0.203096	0.324817	0.744077	0.351378	0.461489	0.49519	0.508319	0.651274	0.938631	0.995936	0.490019	1.208	0.413851	0.390451	1.12651	0.905513	1.35488	0.360783	0.983662	0.99974	0.758405	0.664619	0.466697	0.706461	0.896834	0.486427	0.701926	0.296673	0.203096	0.981215	0.325637	2.04286	0.283403	0.892081	0.476134	0.843926	0.817011	0.415724	0.541265	1.86682	0.986495	0.516855	0.769437	0.544784	1.23702
N-acetylthreonine	Amino acid	Glycine, serine and threonine metabolism	0.968009	0.37472	0.37472	0.37472	0.859372	0.37472	0.728692	0.37472	0.37472	0.37472	1.06877	0.386057	1.24364	1.36507	0.37472	0.37472	1.1306	0.37472	2.58753	0.619113	1.29127	1.13357	1.26208	1.01447	0.37472	0.37472	0.700951	1.5142	0.893173	0.585088	0.806273	1.21455	0.37472	1.54099	0.37472	0.37472	1.04556	0.769849	1.28183	0.925711	0.37472	2.61456	1.43047	0.37472	0.949208	0.584558	1.52764
N-acetyltryptophan	Amino acid	Tryptophan metabolism	1	0.006796	0.006796	0.006796	0.006796	0.006796	0.006796	0.006796	0.006796	0.006796	0.006796	0.006796	0.006796	0.006796	0.006796	0.006796	0.006796	0.006796	0.02727	0.006796	0.006796	0.006796	0.006796	0.006796	0.006796	0.006796	0.006796	0.006796	0.006796	0.006796	0.006796	0.006796	0.508511	0.006796	0.006796	0.066675	0.006796	0.690042	0.006796	0.006796	0.006796	0.006796	1.54799	0.006796	0.006796	0.006796	0.011082
N-acetyltyrosine	Amino acid	Phenylalanine & tyrosine metabolism	0.392386	0.392386	0.392386	0.392386	0.392386	0.392386	0.392386	0.392386	0.392386	0.392386	1.31423	0.392386	0.392386	0.392386	0.392386	0.392386	0.392386	0.392386	0.392386	0.392386	1.1342	0.766659	0.392386	0.392386	0.392386	0.392386	0.392386	2.6487	0.392386	0.392386	0.392386	0.555414	0.392386	0.392386	0.392386	0.392386	0.392386	4.46802	0.392386	0.392386	0.392386	0.665513	0.601549	0.392386	0.392386	0.392386	2.41395
N-acetylvaline	Amino acid	Valine, leucine and isoleucine metabolism	0.26458	0.26458	0.914394	0.565216	0.26458	0.26458	0.57014	0.26458	0.71638	0.802195	0.845705	0.26458	0.26458	0.53336	0.26458	0.26458	0.26458	0.26458	0.26458	0.26458	1.36068	1.33654	1.34824	0.26458	0.26458	1.06397	0.729562	0.81217	0.26458	0.714531	0.26458	0.813926	0.745761	0.677107	0.26458	0.26458	1	1.15953	1.24985	0.818505	0.26458	2.10211	0.679471	0.26458	0.869608	0.26458	1.82899
naproxen	Xenobiotics	Drug	1	1	1	1	1	1	1	1	1	1	1	1	1	1	1	1	1	1	1	1	1	1	1	1	1	1	1	1	1	1	1	1	1	1	1	1	1	1	1	1	1	1	1	1	1	1	1
nervonate (24:1n9)	Lipid	Long chain fatty acid	0.931068	0.117847	1.99824	0.117847	0.117847	0.831202	0.698101	0.117847	0.72921	1.06717	1.17559	1.0465	0.117847	0.732368	0.117847	1.63969	1.94999	0.779113	4.43077	0.117847	0.447076	2.16362	0.117847	1.63655	0.117847	0.117847	1.11802	1.66173	4.27004	0.45699	1.32871	1.15488	1.02382	0.117847	1.14277	0.824931	1.24711	2.79094	1.04933	0.117847	0.117847	0.893479	0.117847	1.11147	2.2105	1.20022	1.45931
nicotinamide	Cofactors and vitamins	Nicotinate and nicotinamide metabolism	0.50956	0.156067	0.096199	0.353058	1.32107	0.926366	0.418249	0.404654	0.661047	0.813437	0.722576	1.28541	0.372168	0.718338	0.557528	0.501358	1.59142	0.469813	2.85623	0.520517	0.723252	0.751973	1.10887	0.881538	0.688329	1.10852	0.491364	1.35462	1.2101	0.406436	0.41823	0.851401	0.560067	1.08509	1.00416	1.27445	0.710369	0.691817	0.970506	0.514162	0.493163	1.11669	1.8454	0.744339	1.72139	1.01211	1.31463
nicotinamide adenine dinucleotide (NAD+)	Cofactors and vitamins	Nicotinate and nicotinamide metabolism	1.21195	0.03276	0.257833	0.047588	0.182895	0.18138	0.060097	0.136538	0.636684	0.085439	0.155487	1.36535	0.232913	0.796328	0.234123	8.42568	0.028215	0.227477	0.118978	0.917925	3.26233	0.287841	2.33589	0.535428	2.84756	1.00087	0.103446	0.087662	0.147379	0.06375	0.204996	5.68065	0.734414	0.062384	0.028215	4.13275	0.080196	0.979787	0.099025	0.028215	4.97657	3.45573	0.251936	0.197568	0.718441	1.21842	6.87788
nicotinamide adenine dinucleotide reduced (NADH)	Cofactors and vitamins	Nicotinate and nicotinamide metabolism	0.683182	0.314138	0.314138	0.314138	0.314138	0.314138	0.314138	0.314138	0.314138	0.314138	0.314138	0.851581	0.314138	1.71767	0.314138	6.71818	0.314138	0.314138	0.314138	1.00411	2.90237	0.314138	0.314138	0.314138	1	1.59024	0.314138	0.314138	0.314138	0.314138	0.314138	1.07634	0.314138	0.314138	0.314138	0.314138	0.314138	1.31972	0.314138	0.314138	6.61043	0.314138	0.314138	0.314138	0.314138	2.99044	4.9294
nicotinamide ribonucleotide (NMN)	Cofactors and vitamins	Nicotinate and nicotinamide metabolism	2.50468	0.035226	0.411764	0.035226	0.309979	0.924076	0.035226	0.611999	1.00889	0.398675	0.571124	2.23035	0.519335	0.535073	0.838305	1.32941	1.64726	0.149901	0.132241	0.996491	1.91619	2.11175	2.23702	4.61906	1.63448	1.50495	0.035226	0.184087	0.872217	0.221594	0.921385	3.58173	1.58867	0.035226	0.078442	1	0.176057	0.841508	0.494201	0.035226	0.05714	1.50316	0.341047	1.09871	1.65299	1.29012	1.81072
nicotinamide riboside*	Cofactors and vitamins	Nicotinate and nicotinamide metabolism	1.05527	0.236367	0.236367	0.236367	0.949853	0.76715	0.236367	0.614469	1	0.236367	0.236367	0.974591	0.699416	0.571265	0.691079	0.773995	5.35449	0.236367	0.850072	0.741091	1.01876	2.46338	2.91385	4.17589	1.80174	1.28054	0.994619	1.13264	1.03977	0.236367	0.236367	3.62339	0.755112	0.236367	0.583285	1.89835	0.236367	1.23482	0.527278	0.236367	0.236367	1.23957	0.999218	1.22866	1.88606	0.636502	1.26579
nicotinate	Cofactors and vitamins	Nicotinate and nicotinamide metabolism	1.50451	0.532373	0.888893	0.676974	0.736468	0.923025	0.796418	0.967628	0.943825	0.379663	1.44711	0.379663	0.737714	0.985919	1.23595	1.50959	2.94416	0.912121	0.379663	1.17023	0.601959	1.36079	1.04544	1.74476	0.943731	0.846558	1.28129	0.884618	2.1298	0.379663	0.861987	0.633893	0.693892	1.26571	0.723237	1.26828	0.379663	1.29085	1.02151	0.495296	0.809725	1.72399	1.20303	1.50611	1.04121	0.379663	0.985372
nicotinate adenine dinucleotide (NAAD+)	Cofactors and vitamins	Nicotinate and nicotinamide metabolism	1	1	1	1	1	1	1	1	1	1	1	1	1	1	1	1	1	1	1	1	1	1	1	1	1	1	1	1	1	1	1	1	1	1	1	1	1	1	1	1	1	1	1	1	1	1	1
N-methylglutamate	Amino acid	Glutamate metabolism	1.43704	1.15694	0.046767	1	0.046767	0.562421	1.00027	0.046767	0.228215	0.046767	15.2067	0.805798	0.046767	0.046767	0.046767	0.164804	0.156103	5.83423	1.50004	0.444452	0.977362	0.295659	0.046767	7.17265	1.94987	0.046767	0.046767	0.495901	0.046767	0.046767	0.244704	0.506056	0.046767	0.046767	0.63084	0.046767	0.232248	1.11714	0.046767	0.046767	0.046767	0.046767	0.689432	0.274883	0.046767	0.046767	0.046767
octanoylcarnitine	Lipid	Carnitine metabolism	1.63004	0.314328	0.532962	0.604558	0.709878	0.652509	0.4838	0.150677	0.971237	1.22756	1.26223	1.29478	3.01349	2.21097	0.362755	1.91404	2.34411	1.30286	1.02455	1.73312	2.8234	1.97074	1.12455	3.21284	3.76965	1.42592	1.2973	0.150677	1.08113	0.725323	0.998322	1.01113	1.41189	1.91079	1.03454	0.963819	1.16214	4.84803	1.86806	0.848311	0.685804	0.79341	3.03878	1.46427	2.97886	0.897293	0.697944
oleate (18:1n9)	Lipid	Long chain fatty acid	1.55649	0.582623	1.42708	0.805622	1.09077	1.31881	1.53411	0.9941	1.84234	0.92054	3.39984	1.30536	1.74927	0.992764	0.495941	1.23161	2.17131	0.460474	1.55371	1.73485	0.374763	5.55976	2.78053	4.81338	1.43019	2.81524	2.89735	5.6882	1.80163	0.872381	1.83836	4.74425	1.24517	0.798913	1.3466	1.71985	0.394403	1.42358	1.43921	0.625122	0.241982	2.61203	0.93577	1.12425	0.78018	1.35803	1.87322
oleoylcarnitine	Lipid	Carnitine metabolism	3.19502	3.41734	0.502368	4.73569	4.26478	0.594631	0.928817	0.264131	2.07279	2.07167	0.039638	1.20766	4.85517	1.59911	1.59213	0.631356	1.78743	4.87611	6.68869	0.778149	5.17794	14.6735	1.86388	1.23457	1.07118	1.96112	1.77522	0.373335	2.87797	0.283638	2.25068	0.062298	2.00099	19.2246	1.1861	0.794291	0.846896	13.346	4.0739	0.993336	11.2915	0.85806	0.398365	13.0681	4.7319	1.36444	0.299272
ophthalmate	Amino acid	Glutathione metabolism	0.35269	0.35269	0.35269	0.35269	0.35269	0.35269	0.35269	0.35269	0.35269	0.35269	0.35269	0.35269	0.35269	0.616898	1.26359	0.35269	0.35269	0.35269	0.35269	0.35269	0.35269	0.35269	0.35269	0.35269	0.35269	0.35269	0.35269	0.35269	0.35269	0.35269	0.35269	0.35269	0.35269	3.09011	0.35269	1.87573	1.21428	0.468667	0.35269	0.35269	2.76953	0.35269	1	0.35269	0.35269	0.35269	4.75876
ornithine	Amino acid	Urea cycle; arginine-, proline-, metabolism	0.754658	0.416285	0.636522	0.958709	1.42075	0.72968	1.09181	0.837139	1.30911	0.348497	0.450729	1.19145	0.465555	0.63875	0.440346	0.498132	0.363368	1.23318	1.07611	1.91674	3.0857	2.27268	1.08751	1.08527	1.16678	1.29974	0.789004	4.09245	0.269212	0.683924	0.558947	0.550711	1.06209	0.475326	0.43418	0.803608	1.18676	3.40632	0.683781	1.61335	1.23457	7.84477	0.38644	4.84774	0.843116	0.36117	2.2078
p-acetamidophenylglucuronide	Xenobiotics	Drug	0.161798	0.161798	0.161798	0.161798	0.161798	0.161798	0.161798	0.161798	0.161798	0.161798	0.161798	0.161798	0.161798	0.161798	0.161798	0.161798	0.161798	0.161798	0.161798	0.161798	0.161798	0.161798	0.161798	0.161798	0.161798	0.161798	0.161798	0.161798	0.161798	0.161798	0.161798	0.217687	0.161798	0.161798	0.161798	0.161798	0.161798	0.161798	0.161798	0.161798	0.161798	0.161798	0.161798	0.161798	0.161798	0.161798	0.161798
palmitate (16:0)	Lipid	Long chain fatty acid	1.19377	0.862064	1.0562	0.773225	0.872344	1.28584	1.79869	0.849981	1.46831	1.00649	1.37257	1.15287	1.15129	0.626671	0.838804	0.833694	1.21248	0.92209	0.739165	0.972916	0.766124	1.32616	0.436385	2.1816	1.21465	1.80745	1.3589	1.36698	1.26361	1.10233	1.05391	1.62723	1.2137	0.958674	1.45379	0.951061	0.806432	1.05695	1.4991	0.814729	0.481664	1.64892	0.891855	1.20927	1.10288	1.116	1.67078
palmitoleate (16:1n7)	Lipid	Long chain fatty acid	1.94374	0.726342	1.05142	0.795533	1.61738	1.55867	1.65302	0.997183	2.13286	1.21863	2.63492	0.871905	1.91096	0.675973	0.736794	0.935039	2.26466	0.633893	0.977333	1.89663	0.481038	2.19933	1.42785	3.75396	1.3572	2.95271	2.37468	2.60621	1.92869	0.992642	1.46231	2.73459	1.04372	0.807724	1.47474	2.48679	0.733066	1.48757	1.47094	0.801622	0.322556	2.65383	1.02013	0.981219	1.20402	1.08425	1.47936
palmitoyl sphingomyelin	Lipid	Sphingolipid	1.01887	1.55997	0.874101	0.907716	0.742899	1.19673	1.11431	0.978881	2.11762	0.751709	1.04584	0.634589	1.19407	0.318969	0.715716	0.935552	2.92795	0.590518	1.46344	0.946991	0.165843	1.23611	0.364873	1.20665	0.899845	0.278183	1.05627	1.07178	3.11359	0.680651	0.99421	1.04696	0.521934	1.84396	1.79804	1.45402	0.834903	0.98679	2.17796	1.36937	1.35749	0.949679	0.856112	1.02112	1.40865	0.876542	0.976971
palmitoylcarnitine	Lipid	Carnitine metabolism	2.57127	2.90488	0.510323	3.1198	2.41237	0.430261	0.726969	0.206307	1.4801	1.56699	0.283744	1.06936	2.72856	1.19971	1.17019	0.584632	1.49233	3.47378	0.727423	0.522894	4.51829	10.2033	1.12101	1.02779	1.02233	1.08078	1.63934	0.252933	3.27745	0.215306	1.73565	0.1566	1.57315	19.7448	1.1406	0.486349	0.613964	8.88933	4.11115	1.07212	6.50479	1.08421	0.425273	9.45603	2.44483	1.36308	0.378463
pantothenate	Cofactors and vitamins	Pantothenate and CoA metabolism	0.204699	0.100131	0.116903	0.448733	0.644075	0.494827	0.283186	0.349927	0.283676	0.230213	0.669668	0.463908	0.261446	0.782205	0.365635	0.236683	0.700459	0.355768	0.456002	0.425489	0.435996	0.62327	0.505965	0.531474	0.757052	0.508798	0.34113	0.462251	0.909885	0.154432	0.195895	0.460843	0.241281	0.741106	0.303957	0.436027	0.190454	0.266397	0.495771	0.426892	0.278761	0.780177	0.345587	0.372109	1.29215	0.322298	0.897826
paroxetine	Xenobiotics	Drug	0.921868	0.921868	0.921868	0.921868	0.921868	0.921868	0.921868	0.921868	0.921868	0.921868	0.921868	0.921868	0.921868	0.921868	0.921868	0.921868	0.921868	0.921868	0.921868	0.921868	0.921868	0.921868	0.921868	0.921868	0.921868	0.921868	0.921868	0.921868	0.921868	0.921868	0.921868	0.921868	0.921868	0.921868	0.921868	0.921868	0.921868	0.921868	0.921868	0.921868	0.921868	0.921868	0.921868	0.921868	0.921868	0.921868	0.921868
p-cresol sulfate	Amino acid	Phenylalanine & tyrosine metabolism	0.825305	2.3343	0.248483	3.01806	0.480989	0.306414	0.121692	1.38688	0.445547	1.45021	0.455961	1.16638	0.685912	3.45536	3.13027	1.58759	0.451017	2.05819	0.11667	0.611261	0.542969	0.733122	0.760057	0.84295	0.172314	1.45548	0.480965	0.16362	0.138031	0.883746	0.140621	0.386687	0.596765	1.40154	1.22008	0.542545	0.624854	0.339839	0.449272	1.02385	0.434275	0.466115	1.10634	1.32492	0.500777	0.233909	1.30085
pelargonate (9:0)	Lipid	Medium chain fatty acid	0.970824	4.48816	0.888145	1.31716	1.0809	1.21049	1.13743	2.26514	1.06846	1.35282	0.809128	0.567506	1.86052	0.808355	1.41309	0.936621	1.07953	1.27472	1.20668	1.60019	0.731317	1.35374	0.633778	1.18126	0.847147	0.780442	1.05653	0.73752	1.09491	1.38999	1.13083	0.634771	1.34732	0.765877	1.22424	0.703956	1.35967	1.30688	1.45617	1.07232	1.16778	0.7404	0.841203	1.04045	0.908009	1.30309	0.828833
penicillin G	Xenobiotics	Drug	0.375483	0.375483	0.375483	0.375483	0.375483	0.375483	0.375483	0.375483	0.375483	0.375483	0.375483	0.375483	0.375483	0.375483	0.375483	0.375483	0.375483	0.375483	0.375483	0.375483	0.375483	0.375483	0.375483	0.375483	0.375483	0.375483	0.375483	0.375483	0.375483	0.375483	0.375483	0.375483	0.375483	0.375483	0.375483	0.375483	0.375483	0.375483	0.375483	0.375483	0.375483	0.375483	0.375483	0.375483	0.375483	0.375483	0.375483
pentadecanoate (15:0)	Lipid	Long chain fatty acid	1.21643	0.836801	0.7911	0.927318	0.874303	1.34936	1.50136	0.567389	1.01771	0.990146	1.39658	1.53217	1.17073	1.09614	0.874951	1.42828	1.97716	0.74142	1.35343	1.30654	0.524602	2.99966	0.977993	2.97399	1.73819	1.52381	1.60299	2.65067	1.19335	0.67692	1.14739	2.30194	0.854026	0.774336	0.984228	1.16874	0.321448	1.48689	1.19608	0.94692	2.99117	1.85837	1.35937	1.06146	0.769598	1.10923	1.37129
phenol red	Xenobiotics	Chemical	0.059941	0.059941	0.059941	0.059941	0.059941	0.059941	0.059941	0.059941	0.059941	0.059941	0.059941	0.059941	0.059941	0.059941	0.059941	0.059941	0.059941	0.059941	0.059941	0.059941	0.059941	0.059941	0.059941	0.059941	0.059941	0.059941	0.059941	0.059941	0.059941	0.059941	0.059941	0.059941	0.059941	0.059941	0.059941	0.059941	0.059941	0.059941	0.059941	0.059941	0.059941	0.059941	0.059941	0.059941	0.059941	0.059941	0.059941
phenol sulfate	Amino acid	Phenylalanine & tyrosine metabolism	0.262776	1.44862	0.202825	4.1921	0.648164	0.449195	0.639536	0.955711	1.05163	1.14332	0.358412	0.567758	1.70205	1.26171	0.913821	1.0855	0.609048	2.95626	0.251967	1.40562	5.45732	0.537531	0.636569	1.17878	2.08596	0.385375	0.77329	1.32418	0.459643	0.583064	1.61336	0.202825	2.20551	0.494081	0.518923	0.304391	2.66381	0.490684	0.874874	0.675428	0.733082	0.678537	0.415393	2.20397	0.202825	0.416308	1.67532
phenylacetylglutamine	Amino acid	Phenylalanine & tyrosine metabolism	0.545752	0.280076	0.162344	5.34821	0.233979	0.209013	0.15768	0.848911	0.449706	0.163563	0.130674	0.592572	0.195277	0.608164	0.243481	0.415914	0.054934	0.699292	0.125906	0.117419	0.917647	0.163159	0.79856	0.331071	0.453753	0.562095	0.163001	0.48311	0.113829	0.218033	0.24387	0.16387	0.157017	0.363353	0.160655	0.123093	0.168395	0.149101	0.228848	0.314634	0.173874	0.410447	0.364473	0.165044	0.783463	0.113539	0.355363
phenylalanine	Amino acid	Phenylalanine & tyrosine metabolism	0.427174	0.204188	0.199348	0.517184	0.633897	0.478229	0.338376	0.310191	0.557316	0.418322	1.15849	0.491287	0.432048	0.582717	0.357865	0.377757	1.5396	0.379727	1.27662	0.43332	0.579282	0.9359	0.721225	1.10796	0.616851	0.435869	1.00515	0.928494	0.918499	0.268288	0.314592	0.594019	0.437512	0.782262	0.53752	0.894061	0.788052	0.896085	0.418499	0.358479	0.529435	0.861636	0.750315	0.97913	0.601191	0.569997	0.638521
phenylalanylalanine	Peptide	Dipeptide	2.66135	0.497908	1.33778	0.671887	0.348541	1.75473	0.305934	0.031021	6.27338	1.58979	14.0244	2.65773	5.72861	1.10853	0.915118	1.95673	5.13009	3.18159	5.747	3.95471	2.95794	11.7596	10.18	8.93085	2.07636	0.341104	2.04906	3.77867	7.83101	0.925624	2.20079	6.13809	1.43292	3.90108	1.21955	28.0483	1.20287	3.10346	1.07438	0.689779	2.99247	9.56005	6.072	4.04341	1.97241	1.55973	14.2258
phenylalanylarginine	Peptide	Dipeptide	0.070408	0.47737	0.070408	0.070408	0.070408	0.070408	0.070408	0.070408	1.00698	0.070408	5.61131	0.070408	0.070408	0.070408	0.070408	0.070408	12.9691	0.070408	0.070408	0.070408	0.070408	0.070408	0.070408	0.070408	0.070408	0.070408	0.070408	0.070408	0.070408	0.070408	0.070408	0.070408	0.070408	0.070408	0.312671	4.42034	0.070408	0.070408	0.070408	0.070408	0.070408	0.070408	0.070408	2.21417	0.070408	0.070408	0.070408
phenylalanylaspartate	Peptide	Dipeptide	1.39544	0.475861	0.665938	0.032726	0.932431	0.951983	0.032726	0.032726	2.5124	1.06449	5.28679	1.96177	1.12952	0.840901	0.829978	0.891078	11.757	0.883504	9.42099	1.24434	1.48649	2.83376	3.22679	7.54571	1.13134	0.181892	1.00149	2.93069	1.41535	0.032726	0.633283	2.19705	0.032726	3.37415	0.659179	4.40107	1.00352	1.3367	0.650849	0.032726	0.787278	3.3012	2.407	2.0469	0.851756	0.788368	1.61262
phenylalanylglutamate	Peptide	Dipeptide	1.21279	1.00924	0.74814	0.731881	1.39509	1.13764	0.521478	0.020007	2.49025	1.2402	12.3223	1.17723	1.60225	0.756627	0.810976	0.861714	3.39698	0.980967	4.54976	2.99662	1.56723	5.36004	3.91076	6.38926	1.38905	0.073687	1.58501	2.43084	4.86847	0.728703	0.624043	2.87883	0.686537	5.86995	1.5032	10.8815	1.09548	1.9844	0.68475	0.348338	1.01914	4.29034	3.20067	8.4158	0.79303	0.943659	3.39909
phenylalanylglycine	Peptide	Dipeptide	1.46708	0.40367	0.780437	0.489933	0.730311	0.559884	0.17738	0.17738	1.38251	0.722115	5.66095	1	1.71743	0.17738	0.47051	0.711748	0.17738	0.775592	1.95667	1.95062	1.25273	3.11567	1.35272	2.15205	0.842797	0.17738	0.52011	1.39928	2.61824	0.444636	0.680395	2.41076	0.45452	1.88905	0.17738	5.79365	0.850366	2.33777	0.47767	0.438215	1.01344	1.91868	1.48638	0.17738	0.386561	0.976768	3.96391
phenylalanylleucine	Peptide	Dipeptide	0.890616	1.28307	0.756216	0.872075	3.20646	1.32655	0.020918	0.020918	7.08421	0.890228	13.7768	1.13516	3.14057	0.53227	0.714296	0.525371	2.139	2.12831	2.31015	4.09321	0.527018	12.3824	5.35746	5.10378	1.91553	0.046193	0.805908	0.505395	4.82596	0.646373	1.78538	3.62505	0.761427	2.29581	2.81108	25.6952	2.63789	3.98866	0.338974	0.020918	2.37899	3.80991	2.39834	6.48589	0.770954	2.21732	3.66675
phenylalanylmethionine	Peptide	Dipeptide	0.769502	0.074253	0.074253	0.754506	0.074253	0.614631	0.074253	0.074253	0.805286	0.94987	3.03885	1.08252	1.05303	0.074253	0.502901	0.900685	6.10098	1.19471	0.55505	0.537947	0.074253	3.1606	1.14042	1.50364	1.01031	0.093284	0.074253	0.074253	1.32136	0.6214	0.074253	1	0.723854	1.69992	0.597227	4.82057	1.11794	1.66159	0.074253	0.074253	1.19655	1.63471	0.989688	1.32745	0.074253	0.074253	1.52584
phenylalanylphenylalanine	Peptide	Dipeptide	0.981788	1.18737	0.708738	0.05381	0.05381	0.778386	0.89786	0.05381	1.3324	0.91878	2.4568	0.759077	0.970976	0.05381	0.825301	0.05381	4.18432	0.05381	2.13177	0.794868	0.05381	4.75175	1.19834	1.51491	1.04547	0.057078	0.05381	0.803882	1.43827	0.05381	0.52002	1.09675	0.568706	0.961241	0.802531	4.15511	0.834254	1.19208	0.05381	0.05381	0.654583	1.45103	0.05381	1.34664	0.05381	0.05381	0.874131
phenylalanylproline	Peptide	Dipeptide	1	0.418472	0.286113	0.286113	0.969714	0.286113	0.286113	0.286113	1	1.1673	5.66618	0.966089	1.05366	0.656255	0.286113	0.286113	1.31991	0.286113	2.79801	0.428262	1.24276	3.05931	1.49994	3.62409	0.286113	0.553385	0.286113	2.02026	1.63722	0.487142	0.286113	2.21303	0.286113	0.286113	0.286113	2.04708	0.89929	1.18082	0.286113	0.286113	0.721669	1.381	0.286113	3.75497	0.286113	0.410536	1.51607
phenylalanylserine	Peptide	Dipeptide	0.995529	0.337661	0.317391	1	0.299739	0.904492	0.230294	0.048825	2.19363	1	7.77236	1.65834	3.31559	1.16142	0.763474	0.654115	9.17618	0.952238	2.45195	1.87475	1.38713	5.5944	3.18939	5.53097	1.13792	0.13288	0.863664	1.19023	2.67361	0.351196	1.11302	3.04373	0.639845	4.20983	0.594056	9.75622	1.03537	2.12867	0.715118	0.725394	1.76758	4.21645	2.70108	1.68878	0.928088	0.681888	3.72958
phenylalanyltryptophan	Peptide	Dipeptide	0.19252	0.19252	0.19252	0.19252	0.19252	0.19252	0.19252	0.19252	0.19252	0.19252	1.8354	0.926969	0.19252	0.19252	0.19252	0.19252	6.27306	0.19252	1.34547	0.19252	0.19252	1.50885	0.19252	2.1365	0.19252	0.19252	0.19252	0.19252	0.993325	0.19252	0.19252	0.19252	0.19252	0.911391	0.849307	1.31297	0.19252	0.423982	0.19252	0.19252	0.19252	1.32888	0.19252	1.71266	0.19252	0.19252	1.03429
phenylalanyltyrosine	Peptide	Dipeptide	0.148786	0.148786	0.148786	0.148786	0.148786	0.959485	0.148786	0.148786	0.969898	0.148786	3.21226	0.148786	0.948719	0.148786	0.148786	0.148786	6.57703	0.148786	1.03774	0.516921	0.148786	2.5239	1.20148	3.27244	0.810536	0.148786	1.0301	0.148786	2.07132	0.148786	0.148786	0.752353	0.148786	1.06413	1.08273	6.55669	0.148786	1.09083	0.148786	0.148786	0.631337	1.67763	1.01844	1.48184	0.148786	0.148786	1.27847
phenylalanylvaline	Peptide	Dipeptide	1.01427	0.652307	0.121135	0.121135	0.121135	0.376067	0.121135	0.121135	2.83186	0.476532	9.59	0.420483	1.08057	0.121135	0.121135	0.199208	13.524	1.66962	2.64001	2.26856	0.668482	4.73681	1.91046	5.67013	1.02227	0.195776	1	2.65899	3.37145	0.121135	0.316031	1.67782	0.121135	3.50208	0.541755	9.55228	0.121135	1.26126	0.121135	0.121135	0.721561	2.70866	1.48325	2.43314	0.398371	0.121135	2.42652
phosphate	Energy	Oxidative phosphorylation	0.699043	0.247168	0.463959	0.398937	0.494406	0.838902	0.749859	0.538402	0.995585	0.660864	0.96779	1.23042	0.431971	0.948396	0.519577	0.896515	1.78051	0.591759	1.40963	0.721857	0.903526	0.92569	1.08974	1.15615	0.985189	0.792128	0.984713	1.40396	1.49486	0.321133	0.465941	1.03892	0.424789	1.48996	0.614735	1.16607	0.386874	0.451745	0.972438	0.441996	0.522246	1.04777	1.30306	0.629194	1.09944	0.786843	1.08471
phosphoenolpyruvate (PEP)	Carbohydrate	Glycolysis, gluconeogenesis, pyruvate metabolism	0.91941	0.278153	0.251912	0.614156	1.20978	0.40563	0.0569	2.13278	0.746261	0.174686	0.748383	1	1.04142	0.61946	0.376415	0.0569	0.248106	0.540396	0.0569	0.832414	0.374848	0.758892	0.0569	0.0569	0.0569	0.623526	0.762988	0.318084	0.64353	0.707697	0.635274	0.0569	0.330476	0.0569	0.546276	0.220745	0.708207	1.17776	0.349224	0.958577	1.00877	0.0569	0.0569	1.14183	0.661084	0.723832	0.635967
phosphoethanolamine	Lipid	Glycerolipid metabolism	0.905269	0.560984	0.73922	0.634404	0.506553	1.12221	0.625101	0.886752	0.798556	0.97143	0.945553	0.715923	0.889393	0.878606	0.581276	1.04428	2.94456	0.662252	2.03891	0.662292	0.635229	1.18933	1.01454	1.4079	0.826132	0.797078	0.83425	0.907393	1.33008	0.597864	1.02906	1.21972	0.680348	1.86419	0.467334	1.39064	0.779395	0.502758	0.979459	0.915055	1.39648	1.14807	1.24392	0.12908	0.885391	1.13793	1.10526
phytosphingosine	Lipid	Sphingolipid	0.974726	0.745809	0.29151	0.744746	0.29151	0.29151	0.29151	0.29151	1.34137	0.604873	0.29151	0.29151	1.2092	0.596537	1.79224	0.29151	1.20346	0.648008	0.29151	0.29151	0.29151	1.22095	0.29151	0.661089	0.29151	0.512616	1.4281	0.29151	0.996958	0.29151	1.19729	0.29151	0.540226	0.29151	0.29151	1.0984	1.18651	2.23709	1	0.87148	1	0.29151	0.29151	1.52304	0.778702	0.373294	0.29151
pipecolate	Amino acid	Lysine metabolism	1.72011	0.377688	0.377688	0.594733	1.30766	0.377688	0.867686	1.17762	0.377688	1.74378	0.501679	0.9875	0.982219	0.58895	1.42836	1.18948	0.377688	1.47788	0.638215	0.656979	0.662609	0.918128	0.377688	0.377688	0.97074	0.377688	1.85284	0.377688	0.613642	0.377688	1.5979	1.18378	3.82515	1.80691	0.866504	1.00623	2.61524	1.39506	0.79569	1.17324	4.92732	0.377688	0.851931	0.377688	0.62704	1.01527	1.00011
piperine	Xenobiotics	Food component/Plant	1.60928	0.655887	0.253114	0.728518	0.561131	0.253114	1.09306	0.698876	1.42328	0.686181	0.253114	0.41042	1.67941	2.74892	1.92531	1.06424	1.1	0.939137	0.781293	0.596465	1.13372	2.13683	2.49029	0.57728	0.665307	0.897093	1	0.728459	0.253114	0.253114	0.670738	0.63364	3.61032	1.00371	1.09896	0.951452	4.1826	1.78687	0.253114	0.440749	5.15777	1	2.02189	1.06324	1.26847	0.874513	1.38808
pivaloylcarnitine	Xenobiotics	Drug	0.230278	0.230278	0.230278	0.230278	0.230278	0.230278	0.230278	0.230278	0.230278	0.230278	0.230278	0.230278	0.230278	1.32818	0.230278	0.230278	0.230278	0.230278	0.55231	0.230278	0.230278	1.53031	0.59389	0.230278	1.02008	0.230278	4.64284	0.230278	0.230278	0.230278	0.386644	0.230278	0.584688	0.230278	0.230278	0.230278	0.230278	5.56806	0.230278	0.230278	0.230278	0.230278	0.830136	0.230278	0.230278	0.230278	0.829677
pregnanediol-3-glucuronide	Lipid	Sterol/Steroid	0.455468	0.455468	0.455468	0.455468	0.455468	0.455468	0.455468	0.455468	0.455468	0.455468	0.455468	0.949306	0.455468	0.455468	0.455468	0.455468	0.455468	0.455468	0.455468	0.455468	0.455468	0.455468	0.455468	0.455468	0.455468	0.455468	0.455468	0.455468	0.455468	0.455468	0.455468	0.455468	0.455468	1.03296	0.455468	0.455468	0.455468	0.455468	0.455468	0.455468	0.455468	0.455468	0.455468	0.455468	0.455468	0.455468	0.455468
pregnen-diol disulfate*	Lipid	Sterol/Steroid	0.230802	0.230802	0.230802	0.230802	0.230802	0.230802	0.230802	0.230802	0.230802	2.0571	1.15048	1.16321	0.230802	0.230802	0.230802	0.230802	0.230802	0.230802	0.230802	0.230802	0.818073	0.230802	0.230802	0.230802	0.737483	0.230802	0.230802	0.230802	0.230802	0.230802	0.230802	0.230802	1.04285	2.81533	0.230802	0.230802	0.230802	0.592652	0.230802	1.05729	0.730014	0.230802	0.230802	0.230802	0.230802	0.230802	0.415892
pro-hydroxy-pro	Peptide	Dipeptide	0.74088	0.451619	0.178804	0.891401	0.433015	0.672385	0.705852	0.721721	0.5258	0.528401	0.712077	0.444762	0.867027	0.728571	0.337039	0.178804	0.178804	0.445619	0.646785	0.178804	0.66001	0.702393	0.647329	0.735993	0.560893	0.430974	0.585043	0.829712	0.529811	0.480787	0.573182	0.456141	0.540467	1.72196	0.221225	0.830657	0.362613	0.49661	0.394929	0.548182	0.829956	0.178804	0.693664	0.972606	0.469412	0.431366	0.723201
proline	Amino acid	Urea cycle; arginine-, proline-, metabolism	0.393168	0.212945	0.312854	0.750567	0.841178	0.431574	0.35107	0.584926	0.503581	0.546327	1.01524	0.499159	0.519052	0.901254	0.493864	0.359385	1.1437	0.366748	1.2473	0.417599	0.631318	1.16142	0.669812	0.735502	0.770186	0.527737	0.769929	0.630465	1.18104	0.292994	0.550764	0.573253	0.550099	1.04417	0.449789	0.606228	0.725797	0.641405	0.61342	0.539623	0.556214	0.814786	0.804446	0.473382	0.597391	0.380354	0.529298
prolylglycine	Peptide	Dipeptide	0.695063	0.184946	0.412351	0.563635	0.184946	0.45321	0.521534	0.665579	1.00136	0.184946	1.16782	0.535969	0.669343	0.184946	0.509811	0.308418	2.1111	0.39519	1	0.267115	0.287757	0.184946	0.371236	0.819631	0.184946	0.184946	0.673113	0.734732	0.184946	0.184946	0.480401	0.184946	0.426894	0.890365	0.386194	0.184946	0.559125	0.47799	0.381477	0.184946	0.492091	1.0978	0.184946	1.13412	0.647261	1.0028	0.184946
prolylmethionine			0.843718	0.157837	0.36485	0.157837	0.62057	0.607576	0.157837	0.157837	1	0.475859	5.36494	0.848609	0.157837	0.157837	0.157837	0.157837	9.57333	0.157837	2.19014	0.850001	1.06033	5.14609	1.70498	6.22922	0.870002	0.157837	0.869205	2.4642	2.52858	0.157837	0.157837	1.66812	0.777349	1.9	1.13202	3.98499	0.709164	0.487438	0.484161	0.157837	0.157837	2.52741	2.18634	3.83756	0.846276	0.157837	1.10236
propionylcarnitine	Lipid	Fatty acid metabolism (also BCAA metabolism)	0.488711	0.249587	0.124299	0.536063	0.556264	0.406235	0.385615	0.193738	0.34997	0.571186	1.52141	0.639789	0.517886	0.683143	0.271716	0.601515	4.40126	0.404363	1.42072	0.670301	0.616257	0.812395	1.10295	1.49684	1.1933	0.324349	0.809226	1.04811	0.505959	0.203546	0.833265	0.947626	0.33352	0.827887	0.521774	1.48476	0.671327	0.679085	0.330381	0.51612	0.233653	1.68576	3.61153	0.71545	0.595792	0.326795	1.54379
prostaglandin A2	Lipid	Eicosanoid	0.843295	0.373191	0.373191	0.373191	0.373191	0.373191	0.373191	0.373191	0.373191	0.373191	0.373191	0.373191	0.373191	0.373191	0.373191	0.373191	0.373191	0.373191	1	0.373191	0.373191	0.373191	0.373191	0.373191	0.373191	0.373191	1.22635	0.373191	0.373191	0.373191	0.373191	0.373191	0.373191	0.373191	0.373191	0.373191	0.373191	0.373191	0.373191	0.373191	0.373191	0.373191	0.373191	0.373191	0.373191	0.373191	0.373191
prostaglandin E2	Lipid	Eicosanoid	0.904085	0.187102	0.187102	0.187102	0.187102	0.187102	0.187102	0.187102	0.187102	1.09591	0.187102	0.187102	0.187102	0.187102	0.187102	0.187102	0.187102	0.187102	3.84807	0.187102	0.187102	0.187102	0.187102	0.187102	0.187102	0.187102	1.15956	0.187102	0.187102	1	0.187102	0.187102	0.187102	0.187102	0.187102	0.187102	0.900769	0.187102	0.187102	0.187102	0.187102	0.187102	0.187102	0.187102	0.187102	0.187102	0.187102
pseudouridine	Nucleotide	Pyrimidine metabolism, uracil containing	0.506184	0.322023	0.219605	1	0.45668	0.219605	0.219605	0.219605	0.220524	0.498649	0.617162	0.536715	0.405602	0.753591	0.219605	0.399013	0.219605	0.219605	0.489499	0.319715	0.423661	0.946173	0.789408	0.219605	0.55997	0.219605	0.219605	0.508261	0.449679	0.219605	0.489917	0.459373	0.371238	0.69474	0.219605	0.29732	0.361387	0.522673	0.320616	0.420548	0.576018	0.219605	0.865158	0.219605	0.243792	0.477366	2.03489
putrescine	Amino acid	Polyamine metabolism	2.66069	0.295403	0.303902	0.202004	0.271443	0.398899	0.192184	0.075988	0.761383	2.33689	2.55182	0.791193	0.872174	1.26386	1.2165	3.08286	52.8891	0.859087	8.42723	1	1.65186	3.14685	2.25238	4.8541	5.71882	1.16664	1.05088	2.04463	15.6981	0.182174	1.46881	8.92562	0.219406	13.2852	0.85807	4.89961	0.995563	0.767789	2.15543	0.564183	3.65919	1.89635	5.54364	4.53701	9.37461	0.778184	5.27639
pyridoxal	Cofactors and vitamins	Pyridoxal metabolism	0.239595	0.221882	0.221665	0.757133	0.221665	0.933578	0.221665	0.881457	0.463215	0.796199	0.221665	0.383193	0.221665	0.221665	0.221665	0.221665	0.601754	0.221665	0.830765	0.484613	0.380204	0.956389	1	0.221665	0.374324	0.221665	0.972063	0.650999	0.722111	0.221665	0.221665	0.471813	0.221665	0.221665	0.380546	0.733223	0.221665	0.781609	0.536207	0.317797	0.221665	0.724287	0.80076	1.01265	0.806654	0.536889	1.05889
pyridoxate	Cofactors and vitamins	Vitamin B6 metabolism	0.210845	1.22594	0.210845	0.487636	0.210845	0.210845	0.210845	0.210845	0.210845	0.210845	0.210845	0.210845	0.210845	0.210845	0.210845	0.210845	0.210845	0.210845	0.210845	0.41617	0.210845	0.210845	0.210845	0.210845	0.210845	0.210845	0.210845	1.53382	0.432194	0.210845	0.210845	0.210845	0.210845	0.210845	0.210845	0.806583	0.210845	0.663738	0.210845	0.210845	0.210845	0.210845	5.75405	0.210845	0.634106	0.210845	0.642068
pyroglutamine*	Amino acid	Glutamate metabolism	5.10146	0.724864	0.771841	0.432954	0.940404	0.489044	1.44507	0.206977	3.16603	1.09324	21.7098	0.462592	0.476333	1.01185	0.60749	18.4797	3.53559	0.43192	3.06927	1.79573	2.58767	2.61322	2.18915	11.6709	3.46876	0.599536	8.60874	6.7968	0.700908	0.32491	4.63464	0.988153	0.969135	1.93126	1.3158	10.7098	0.335035	1.73916	1.72591	0.869486	0.527884	1.16204	5.14635	0.826899	1.53988	2.34551	3.58551
pyrophosphate (PPi)	Energy	Oxidative phosphorylation	0.455548	0.911958	0.476843	0.362356	2.3368	1.93013	0.162634	1.13843	1.00927	1.34561	2.73592	2.23287	1.24683	1.21412	0.162634	0.162634	0.380489	1.16611	0.347616	0.881811	0.63991	0.555497	0.32594	0.162634	0.162634	1.64769	0.415564	0.368803	0.455109	1.91552	1.25954	1.28726	0.162634	0.162634	4.37705	0.162634	0.766694	0.380607	0.603624	1.35616	0.162634	1	0.162634	0.850723	0.61322	2.34567	0.610181
quebrachitol	Xenobiotics	Food component/Plant	0.505382	0.723482	0.910034	1.97973	0.266029	1.72531	0.266029	0.266029	0.266029	0.666321	1.32142	0.266029	0.266029	1.31373	0.266029	0.266029	0.266029	0.401154	2.18163	0.266029	0.266029	11.2686	0.266029	0.266029	0.266029	0.266029	0.458955	6.25881	0.266029	0.266029	0.266029	0.266029	0.266029	0.818337	0.266029	1.17605	0.266029	0.266029	1.80006	0.266029	1.41132	0.266029	0.266029	0.266029	0.266029	0.266029	1.1227
quinate	Xenobiotics	Food component/Plant	0.210964	0.380483	0.471355	1.24769	0.548085	0.08027	0.41823	0.216926	0.71319	2.11314	2.19322	0.08027	1.04475	1.26782	0.314191	0.72717	2.50525	0.611638	0.963056	1.72843	0.08027	0.656519	0.875216	1.07322	0.550496	0.23128	1.0529	0.803064	0.420277	0.700147	1.71988	0.174919	0.405086	0.349094	1	1.76138	0.08027	0.08027	0.730621	0.08027	0.939649	0.311365	0.948666	0.08027	0.556441	0.741616	0.402013
quinidine	Xenobiotics	Drug	0.342017	0.342017	0.342017	0.342017	0.342017	0.342017	0.342017	0.342017	0.342017	0.342017	0.342017	0.342017	0.342017	0.342017	0.342017	0.342017	0.964469	0.342017	0.342017	0.342017	0.342017	0.342017	0.342017	0.342017	0.342017	0.342017	0.342017	0.342017	0.342017	0.342017	0.342017	0.342017	0.342017	0.342017	0.342017	0.342017	0.342017	0.342017	0.342017	0.342017	0.342017	0.342017	0.342017	0.342017	0.342017	0.342017	0.342017
quinolinate	Cofactors and vitamins	Nicotinate and nicotinamide metabolism	0.117918	0.117918	0.117918	0.840572	0.117918	0.677783	0.117918	0.117918	0.117918	1	2.10296	1.04062	0.418022	2.06901	0.117918	0.117918	0.991904	0.117918	3.5107	2.65436	0.78391	0.117918	0.117918	0.579853	0.930749	0.117918	1.3598	0.117918	0.841437	0.829145	0.117918	0.117918	0.117918	2.52193	0.117918	0.117918	0.117918	0.809412	0.763256	3.36976	0.587467	0.822743	0.117918	0.117918	0.117918	0.564801	1.53104
ranitidine	Xenobiotics	Drug	0.211705	0.211705	0.211705	0.211705	0.211705	0.211705	0.211705	0.211705	0.211705	0.211705	0.211705	0.211705	0.211705	0.211705	0.211705	0.211705	0.211705	0.211705	0.211705	0.211705	0.211705	0.211705	0.211705	0.211705	0.211705	0.211705	0.211705	0.211705	0.211705	0.211705	0.211705	0.211705	0.211705	0.211705	0.211705	0.211705	0.211705	0.211705	0.211705	0.211705	0.211705	0.211705	0.211705	0.211705	0.211705	0.211705	0.211705
ribitol	Carbohydrate	Nucleotide sugars, pentose metabolism	0.701853	0.056314	0.408787	0.20748	1.02865	0.595288	0.245041	0.150178	0.541263	0.506475	1.21422	1.98233	0.276939	0.631604	0.29337	4.55938	2.08766	0.278123	4.03617	0.243101	1.00986	0.672253	0.55892	1.17183	1.62047	0.367563	0.332613	10.8681	1.06842	0.278391	0.592676	1.07292	0.508571	1.02509	0.192689	1	0.366014	0.244543	0.505682	0.289358	21.1854	1.06308	0.892165	0.465429	0.923917	2.2636	0.872526
riboflavin (Vitamin B2)	Cofactors and vitamins	Riboflavin metabolism	0.845905	0.423205	0.192035	0.425323	0.571328	0.965513	0.806893	0.192035	0.777513	0.192035	0.982712	1.07876	0.546694	0.809481	0.64469	0.575449	0.896795	0.575706	0.985744	0.555121	0.701919	0.560915	0.603366	1.55043	0.742596	0.498746	0.882422	1	0.76294	0.839217	0.637789	0.845336	0.818874	0.698691	0.411663	0.623343	0.310293	0.641989	0.382632	0.725088	0.192035	0.812873	0.995351	0.490819	0.600947	0.472601	0.737158
ribose	Carbohydrate	Nucleotide sugars, pentose metabolism	0.574296	0.070523	0.168918	0.129865	0.109075	0.297769	0.268851	0.162265	0.331861	0.15367	1.11693	0.59009	0.157186	0.963852	0.166411	0.468259	2.38174	0.094059	7.81267	0.132433	0.485841	1.41051	0.979677	1.3856	0.986627	1.00117	1.26667	2.23167	1.10859	0.021712	0.056011	0.526943	0.1348	1.54864	0.541676	1.49838	0.269285	0.228664	1.09034	0.186139	0.262024	1.60646	1.95811	1.40522	0.999364	0.426177	1.00961
ribulose	Carbohydrate	Nucleotide sugars, pentose metabolism	0.685997	0.372374	0.214281	0.454046	1.37041	0.919932	0.787708	0.485707	0.696797	0.978179	1.02349	1.06982	0.705441	1.16756	0.806609	2.39902	1.2027	0.895699	2.59878	0.730269	0.838189	1.59716	1.64736	2.36978	1.22666	1.49723	1.49794	2.06808	1.62414	0.476316	0.552293	0.985276	0.719107	0.978013	1.42438	1.2701	1.42572	0.990541	1.85908	1.36746	0.894106	1.1576	1.02176	1.31441	1.58952	0.831196	1.10008
saccharopine	Amino acid	Lysine metabolism	0.747947	0.144878	0.144878	1.20691	0.407852	0.144878	2.40323	0.144878	0.144878	0.144878	0.144878	0.61842	1	0.144878	0.144878	0.144878	0.144878	0.144878	4.95953	0.144878	4.76003	0.641447	1.11102	1.74517	0.355201	0.144878	0.144878	4.22473	0.144878	0.144878	0.523329	0.144878	0.144878	0.144878	0.144878	1	0.639827	4.27086	0.347364	0.144878	0.144878	1.37295	0.144878	3.18813	0.144878	0.144878	0.144878
S-adenosylhomocysteine (SAH)	Amino acid	Cysteine, methionine, SAM, taurine metabolism	1.03162	0.232885	0.283402	0.826563	0.990412	0.787781	0.60219	0.532467	1.31263	0.817411	2.31062	0.998251	0.788743	1.19272	0.591576	0.998328	5.7694	0.613868	2.86189	0.861692	1.49355	1.58624	1.58028	1.60833	1.43602	0.786131	0.724591	2.18169	2.91294	0.293464	0.671664	1.74747	0.764154	3.34522	0.992746	3.98566	0.662962	1.42372	1.04542	0.828267	0.955017	2.21666	3.44821	2.77733	1.45919	0.96751	3.00065
S-adenosylmethionine (SAM)	Amino acid	Cysteine, methionine, SAM, taurine metabolism	0.275579	0.516145	0.699004	0.590681	0.705499	1.10166	0.6068	0.275579	1.38625	0.275579	3.07193	0.631352	0.327224	0.98122	0.616355	0.829643	2.165	0.402624	1.21847	0.655241	0.608011	1.30819	1.26422	1.02625	1.03892	0.507897	0.507682	0.732785	0.999703	0.543503	0.423426	1.069	0.898322	2.44075	0.603208	1.33904	0.81045	0.673569	1.14812	0.57696	0.677361	2.76468	1.42997	1.89025	0.760754	0.693094	2.24204
salicylate	Xenobiotics	Drug	1	1	1	1	1	1	1	1	1	1	1	1	1	1	1	1	1	1	1	1	1	1	1	1	1	1	1	1	1	1	1	1	1	1	1	1	1	1	1	1	1	1	1	1	1	1	1
sarcosine (N-Methylglycine)	Amino acid	Glycine, serine and threonine metabolism	2.36203	0.67635	0.753765	1.04409	0.982947	1.0915	3.27047	0.282138	0.878576	1.61281	1.80082	1.48368	1.02061	1.48208	0.454524	1.98483	0.837557	2.41655	3.55781	2.56615	3.54774	1.74642	1.72415	2.104	1.08464	0.658864	3.11281	2.06616	2.1536	0.51992	1.08703	2.52674	1	1.28799	2.9415	2.25364	1.23722	0.814709	1.10423	1	0.671439	1.2993	2.31081	2.79542	2.32579	1.2264	2.06015
scyllo-inositol	Lipid	Inositol metabolism	0.333884	0.605847	0.295549	0.747013	0.415837	0.873879	0.998274	0.17935	0.408621	0.126727	0.275211	0.391083	0.363427	0.256545	0.490259	0.935109	0.607381	1.70392	0.404461	0.111348	1.01557	0.274858	0.253015	0.893825	0.249138	0.251999	0.042453	0.307916	2.27355	0.118205	0.320645	0.752563	0.382321	0.293692	0.228562	4.68506	0.107261	0.75681	1.36184	0.187164	0.448756	0.328009	1.38624	0.087203	0.657043	0.126288	0.660063
sedoheptulose-7-phosphate	Carbohydrate	Nucleotide sugars, pentose metabolism	1.01047	0.372654	0.245045	0.530851	0.877063	1.34521	0.991648	1.02172	0.720163	0.911614	0.801607	0.923538	0.682706	1.31565	0.463401	0.248755	3.34045	0.556361	1.59209	1.40098	0.74266	0.897209	2.13256	1.0632	1.30364	0.795557	1.34871	1.93876	1.94483	0.519523	0.592495	3.40799	0.964194	0.308727	0.613683	1.7021	0.537086	0.28603	1.07017	1.26648	0.867477	0.924587	2.0559	0.788786	2.39032	1.54279	1.68475
serine	Amino acid	Glycine, serine and threonine metabolism	0.207569	0.088765	0.174675	0.337629	0.732113	0.36472	0.352226	0.441939	0.454493	0.258193	1.01483	0.861895	0.337178	0.689887	0.199428	0.413561	1.20122	0.270572	0.967848	0.341124	0.508021	1.04331	0.690015	0.685504	0.48218	0.880668	1	0.507121	0.59657	0.174082	0.248791	0.465126	0.261821	0.550842	0.500458	0.548247	0.48676	0.769087	0.612163	0.350418	0.380092	0.717197	0.602108	0.796174	0.35636	0.374243	0.451059
serylisoleucine*	Peptide	Dipeptide	0.229295	0.229295	0.410373	1.10362	0.229295	0.789967	0.668981	0.300005	1.50568	0.419536	2.96902	1.0431	1	0.348849	0.449401	0.597475	17.8895	0.229295	1.85603	0.758809	0.877378	2.24628	1.21342	4.14457	0.957527	0.229295	1.14534	0.906596	1.3653	0.377321	0.495217	0.985273	0.594821	3.36156	0.643635	5.00244	0.229295	0.596024	0.229295	0.388906	1.11538	2.61108	1.66024	1	0.735656	0.439431	1.18315
serylleucine	Peptide	Dipeptide	1.14996	0.677121	1.13706	0.685086	0.318552	2.01387	0.165443	0.03049	5.85826	0.845349	11.4429	2.18191	3.60276	0.570927	0.790352	0.754412	6.63614	2.24668	6.55334	2.15377	2.50066	12.0851	8.19427	13.9643	3.97763	0.174969	2.30529	2.3629	10.2383	0.253079	1.02509	5.54886	0.915762	12.6122	0.844961	30.2727	0.892439	2.12434	0.955365	0.402078	2.74436	9.56403	7.81742	2.11767	1.50503	1.10756	5.25867
serylphenyalanine	Peptide	Dipeptide	0.716966	0.696695	0.601104	0.436523	1.42636	1.92083	0.339699	0.086484	4.72116	1.50591	7.3222	1.92981	2.34925	2.00042	0.764068	0.574754	4.17578	1.55711	6.4147	1.91149	1.28656	6.25516	4.46459	8.34618	2.8191	0.124348	3.138	1.70217	4.23959	0.511291	0.650284	2.94108	0.924305	4.39527	1.19844	13.2359	0.942522	2.1583	0.711159	0.352639	2.41558	5.82487	2.98716	3.43333	1.61553	1.33073	2.93732
serylvaline	Peptide	Dipeptide	0.532754	0.10639	0.520744	0.10639	0.10639	1.04263	0.10639	0.10639	2.00187	1.37728	4.09898	0.948928	0.955571	0.10639	0.545017	0.653494	5.61494	0.709551	3.5219	0.802239	1.05107	2.97689	2.38877	3.46074	1.09867	0.141619	1.08013	2.0992	2.30174	0.10639	0.374908	1.45568	0.460833	2.8543	2.80433	7.71431	0.958202	1.00637	0.10639	0.10639	1	2.79456	1.75982	4.49214	0.951319	0.474424	1.92826
S-methylcysteine	Amino acid	Cysteine, methionine, SAM, taurine metabolism	0.657758	0.374923	0.238719	0.355163	0.586394	1.61799	0.85195	0.423113	0.932072	0.543844	0.632971	0.906035	0.837897	0.602179	0.20018	0.995868	2.17699	0.395935	1.86813	0.798572	0.430416	1	2.21839	1.9318	1.15385	1.27118	0.914924	1.24587	1.70347	0.194576	0.376578	1.72159	0.582096	1.38024	0.40973	1.00728	0.42584	1.16884	0.900673	0.38869	0.942975	1.02917	1.41595	0.805154	1.35078	0.909966	1.68067
sorbitol	Carbohydrate	Fructose, mannose, galactose, starch, and sucrose metabolism	8.1732	0.027338	0.820115	0.666651	0.70535	1.5442	0.650501	0.498709	0.615442	0.935008	1.51981	3.78879	0.820593	1.52582	0.404125	3.75688	4.33423	0.84816	2.43572	0.188617	4.52136	0.943821	0.857132	3.83636	4.24784	1.15763	0.215016	94.0431	1.17188	0.370705	5.15523	1.69467	2.48766	1.55198	0.389509	1.77835	1.22956	0.23607	0.368567	0.788761	230.192	1.52202	2.1362	0.70576	1.98466	47.1903	0.91208
sorbitol 6-phosphate	Carbohydrate	Fructose, mannose, galactose, starch, and sucrose metabolism	1.40183	0.511003	1.06125	0.615924	0.917207	0.999587	0.984605	0.332422	1.00617	1.01438	2.11287	1.32902	0.922593	0.982925	0.881177	1.63552	1.56237	0.630667	2.52051	0.891783	1.34674	0.880935	0.888486	1.40618	1.28462	0.72911	1.3234	7.44912	1.25464	0.752012	1.49673	1.01432	1.00041	1.40735	0.332422	1.73327	0.793004	0.937981	0.975407	0.889881	40.2902	1.04767	1.17523	0.332422	1.08383	5.20681	1.05471
spermidine	Amino acid	Polyamine metabolism	0.516883	0.644566	0.436878	0.759764	0.961585	0.833628	0.635665	0.373321	1.02891	1.29886	1.94382	1.30146	0.842396	1.40305	1.33054	1.00818	3.59588	0.925176	2.62285	0.977509	1	2.3614	1.2443	1.48152	1.62017	0.486174	2.00419	1.49179	2.56373	0.406745	0.928719	1.68257	0.758237	1.59054	1.98677	3.66048	1.19584	0.962076	1.19634	0.863081	1.05916	1.60447	2.8468	1.78168	4.18094	1.13146	1.75532
spermine	Amino acid	Polyamine metabolism	0.045647	0.045647	0.045647	0.045647	4.04989	0.045647	0.749655	0.045647	0.590476	0.045647	0.778299	0.951297	0.045647	0.045647	0.045647	0.045647	4.24825	0.045647	0.045647	0.045647	1.35583	2.4015	0.045647	0.553369	0.045647	0.184995	0.045647	0.045647	0.748591	0.045647	0.045647	0.045647	0.664894	0.045647	2.13481	3.94785	0.681294	0.045647	1	0.045647	0.045647	1.5486	3.39281	1.82047	4.22388	0.045647	1.09191
sphinganine	Lipid	Sphingolipid	1.66969	1.09685	0.174449	1.18326	0.827068	0.395041	0.174449	0.174449	0.969367	0.174449	0.174449	0.174449	0.174449	0.174449	1.83893	0.174449	2.34948	1.39926	0.392979	0.64032	0.174449	1	0.174449	0.174449	0.174449	0.174449	3.23217	0.174449	0.840305	0.174449	0.58812	0.174449	1.21156	0.174449	1.08191	1.3394	0.708793	1.10923	0.822695	0.174449	0.174449	0.174449	0.174449	2.16355	1.03063	1	0.174449
sphingosine	Lipid	Sphingolipid	1.90239	3.61794	0.749822	2.70275	2.87492	1.44154	0.459977	0.634623	1.68507	1.02296	0.534131	0.744	1.52402	0.66932	3.10694	0.309778	3.29645	2.32934	1.68522	3.7434	0.514203	4.24024	0.494577	0.320843	0.552604	0.803105	5.23592	0.361604	3.0827	0.345005	1.07977	0.13296	1.24062	5.40811	3.54059	2.04808	1.87078	5.40729	3.4944	2.26889	1.45373	1.14185	0.724865	3.43946	3.19557	1.16926	0.13296
squalene	Lipid	Sterol/Steroid	1.82823	2.24184	0.716429	0.574018	0.241796	0.241796	0.241796	0.241796	0.241796	0.241796	0.241796	0.951409	0.241796	0.913885	0.241796	0.241796	0.241796	0.241796	5.92804	0.657555	0.643983	0.241796	0.825693	0.898812	0.241796	0.241796	0.241796	0.783589	0.241796	0.613858	0.241796	0.241796	0.241796	0.241796	0.241796	0.310569	0.495343	0.610317	0.824057	0.241796	1.20745	0.772815	0.241796	1	0.241796	0.241796	0.241796
stachydrine	Xenobiotics	Food component/Plant	2.61313	5.44065	0.122791	2.27155	0.299745	0.237308	2.25972	0.07209	0.67992	0.415529	11.4715	2.18346	0.731749	2.10321	0.151881	0.370298	0.688691	2.89807	1.05013	1.21977	6.38567	0.613336	0.288988	4.64991	16.4383	0.167411	0.370648	0.617415	0.456791	0.432965	1.51048	0.797175	0.540433	0.470957	0.865724	1.00319	0.464632	5.27561	0.805829	0.237987	0.824694	0.59743	0.6802	1.19629	1.66698	0.464346	0.07209
stearate (18:0)	Lipid	Long chain fatty acid	1.45139	0.832453	1.50692	0.976584	0.809602	1.58823	1.71898	0.970408	1.79175	1.26288	1.25513	1.46623	1.3516	0.63331	1.00674	1.07366	1.19641	0.941857	1.7513	1.28126	0.912729	1.31592	0.457401	2.01466	1.56661	1.35003	1.72086	1.4756	2.22377	1.4314	1.32746	1.60827	1.51993	1.14648	1.38847	1.0399	0.735767	1.23789	1.47343	1.01279	0.64444	1.48562	0.901246	1.26231	1.40293	1.11789	1.51513
stearidonate (18:4n3)	Lipid	Long chain fatty acid	3.5795	0.901984	2.08735	0.607844	2.25454	3.34742	8.27446	2.36849	5.79175	3.30168	3.54533	1.02435	1.38021	0.986223	0.834852	1.45089	0.742293	0.837653	0.969769	0.942632	0.901653	3.3837	1.30877	4.25733	1.24226	4.4983	1.95986	7.73868	0.542038	0.724329	0.966365	3.46196	0.898737	0.739567	2.19541	4.03555	0.471221	1.14853	3.24136	0.991216	0.511461	1.30448	0.384426	1.033	1.83353	0.946264	1.36467
stearoylcarnitine	Lipid	Carnitine metabolism	0.960745	1.81667	0.164178	2.24267	0.908645	0.246909	0.427031	0.117892	1.04694	0.679466	0.219683	0.331199	1.17735	0.287627	0.91917	0.229815	1.8888	1.84574	0.532851	0.303454	1.60773	9.71643	0.485197	0.637961	1	0.632591	0.678758	0.270118	3.2934	0.126685	0.745768	0.067708	0.843936	27.8593	0.92574	0.688401	0.529529	9.51369	2.0051	0.504503	6.6727	1.08083	0.233793	16.718	2.25942	0.756496	0.340717
streptomycin	Xenobiotics	Drug	0.857767	0.857767	0.857767	0.857767	0.857767	0.857767	0.857767	0.857767	0.857767	0.857767	0.857767	0.857767	0.857767	0.857767	0.857767	0.857767	0.857767	0.857767	0.857767	0.857767	0.857767	0.857767	0.857767	0.857767	0.857767	0.857767	0.857767	0.857767	0.857767	0.857767	0.857767	0.857767	0.857767	0.857767	0.857767	0.857767	0.857767	0.857767	0.857767	0.857767	0.857767	0.857767	0.857767	0.857767	0.857767	0.857767	0.857767
succinate	Energy	Krebs cycle	1.13916	0.133548	0.228145	0.470787	0.256077	0.657399	0.46893	0.435182	1.4953	0.708488	2.19566	0.9682	0.347626	0.958892	0.352302	1.33328	2.4756	1.01851	2.77698	0.392297	1.86838	3.78844	3.7646	2.57186	1.52554	0.711208	1.02798	3.72312	1.08159	0.16614	0.86477	3.04092	0.949282	0.978696	0.500434	2.91642	0.903065	1.09022	0.848034	0.3726	0.57718	3.43498	2.46915	1.52989	2.37858	0.860184	3.3533
succinylcarnitine	Energy	Krebs cycle	0.804349	0.237622	0.110886	0.453122	1.10625	0.110886	0.212667	0.110886	0.378897	0.110886	1.37133	0.879587	0.110886	0.340465	0.110886	0.598579	4.21826	0.110886	3.2158	0.750378	0.484625	1.02199	1.92729	0.762568	0.702121	0.110886	0.490063	2.72664	1.13371	0.593929	0.529163	0.401309	0.235409	0.509861	0.110886	1.81053	0.863435	0.845499	0.296636	0.438329	0.289756	1.08142	2.6445	0.46458	0.278372	0.433756	0.629353
tartarate	Xenobiotics	Food component/Plant	0.516653	0.096071	0.460148	0.096071	0.096071	0.096071	0.096071	0.204532	0.096071	0.096071	1.64942	0.096071	0.096455	0.096071	0.096071	0.096071	0.096071	0.096071	7.56879	0.096071	0.096071	0.096071	0.096071	0.096071	0.096071	0.096071	0.096071	0.096071	0.354817	0.661221	0.096071	0.096071	0.096071	0.096071	0.096071	0.096071	0.096071	0.096071	1.2463	0.096071	0.096071	0.096071	0.096071	0.096071	0.177873	0.096071	0.096071
taurine	Amino acid	Cysteine, methionine, SAM, taurine metabolism	0.736901	0.221397	0.387443	0.33522	0.558666	0.806155	0.468785	0.213371	0.930037	0.692759	1.31455	0.829749	0.422879	1.09108	0.293988	1.24601	1.51404	0.436709	1.13852	0.594959	0.554651	1.50152	1.68039	1.43007	1.19749	1.2199	0.788028	1.65026	1.94986	0.356512	0.638387	1.53382	0.280084	1.79179	0.745165	2.52888	0.777188	0.618382	1.52659	0.43047	0.182826	1.05339	1.16283	0.513994	1.51344	0.974446	2.54626
testosterone	Lipid	Sterol/Steroid	1.60968	1.44963	1.89528	1.58796	0.593659	1.33971	0.83806	0.827262	1	0.875984	0.240395	1.05231	1.54797	1.01993	1.04051	0.94443	1.46724	1.10505	0.854515	0.240395	1.13746	2.45282	1.71664	3.78641	1.08919	1.05339	1.00931	2.35205	0.240395	0.980345	1.63667	0.240395	0.723274	2.3015	0.240395	1.62478	1.16026	0.902242	1.30358	1.69581	1.30922	0.935847	1	0.59804	1.51293	0.240395	0.240395
theobromine	Xenobiotics	Xanthine metabolism	0.70041	0.314351	0.314351	0.664296	0.314351	0.314351	0.314351	0.314351	0.314351	0.314351	0.314351	0.418038	0.314351	1.08811	1.33198	0.688242	0.314351	0.314351	1.04594	1.28054	0.676505	0.759883	0.522667	0.670949	0.314351	0.668838	0.459573	0.314351	0.314351	0.909948	1.15319	0.314351	0.95344	0.314351	0.314351	0.314351	0.314351	0.314351	0.640239	1.13638	0.891208	2.19769	1.88184	0.939631	1.55173	0.954058	0.314351
threitol	Carbohydrate	Nucleotide sugars, pentose metabolism	0.64886	0.501655	0.245375	1.24858	0.245375	0.473926	0.759543	0.245375	0.89626	0.245375	0.245375	0.245375	0.296876	0.698488	0.46448	0.839389	0.245375	0.769934	1.08436	0.312722	0.245375	1.2168	0.962711	0.549478	1.08354	0.245375	0.416292	0.918539	0.735847	0.245375	0.635723	1.32947	0.245375	0.245375	0.778264	0.877047	0.245375	0.990646	0.245375	0.245375	0.915467	0.547579	0.67826	0.245375	0.245375	0.339743	1.3623
threonate	Cofactors and vitamins	Ascorbate and aldarate metabolism	0.493713	3.09385	0.26615	2.81155	5.53433	2.08614	3.72571	4.72211	2.31319	3.51774	1.98744	1.77665	5.21543	4.63026	6.25458	0.958869	0.428112	1.30253	0.988226	3.31125	0.471004	0.914483	0.873969	0.211795	0.664597	0.323856	1.6251	1.22175	0.585145	4.36158	6.35068	0.71124	3.23645	0.271846	10.1168	0.317581	10.7211	4.35027	1.13767	10.4959	4.04377	0.446427	1.06056	2.68008	6.78691	4.37691	0.822339
threonine	Amino acid	Glycine, serine and threonine metabolism	0.296469	0.071261	0.163795	0.264352	0.591503	0.421258	0.331736	0.391152	0.457152	0.32401	1.27186	0.745436	0.304456	0.843293	0.171807	0.434722	1.42506	0.220022	1.08526	0.312175	0.632087	0.907799	0.647784	0.897477	0.489369	0.693224	0.868556	0.705472	0.792441	0.170644	0.268768	0.549186	0.312592	0.596615	0.462705	0.521187	0.524466	0.837214	0.619757	0.306026	0.343287	0.871398	0.699233	0.690952	0.400309	0.420446	0.526779
threonylglutamate	Peptide	Dipeptide	0.656517	0.159973	0.638666	0.437972	0.159973	0.464267	0.159973	0.159973	1.10775	0.413234	3.4661	0.673632	0.597029	0.159973	0.159973	0.914183	6.88107	0.72813	1.6122	0.159973	0.520579	1.10552	0.159973	1.87102	0.572716	0.290633	0.831944	0.83951	2.89818	0.159973	0.159973	1.58714	0.159973	2.73727	0.59676	5.44699	0.159973	0.473176	0.159973	0.159973	0.159973	1.2883	1.0526	1.05288	0.159973	0.701046	0.769382
threonylleucine	Peptide	Dipeptide	0.648093	0.798006	0.690733	0.229213	1.00982	1.40103	0.056989	0.056989	6.56881	0.752828	6.98342	1.03823	2.34847	0.056989	0.454889	0.347421	5.11346	1.68128	3.4978	2.45956	0.737999	10.9791	5.61517	5.59038	1.73913	0.064248	0.947085	0.505574	5.09629	0.288996	0.654913	4.27245	0.361403	3.15037	0.954356	30.1671	0.553308	1.22264	0.250784	0.137451	2.19399	5.4029	2.24029	2.9191	0.574384	0.606238	3.81791
threonylmethionine	Peptide	Dipeptide	1.01526	0.112442	0.534956	0.76485	0.112442	0.506746	0.112442	0.137809	1.4315	0.884153	3.18218	0.653074	0.112442	0.112442	0.112442	0.112442	8.50579	0.112442	1.4394	0.112442	0.684948	2.49778	1.76917	2.79498	0.779252	0.112442	0.769069	0.112442	1.89074	0.600587	0.112442	1.1107	0.112442	2.15254	0.463561	7.31386	0.112442	0.843696	0.112442	0.112442	0.112442	2.25912	1.52094	1.27105	0.574701	0.112442	1.90543
threonylphenylalanine	Peptide	Dipeptide	1	1.02249	1.42093	0.027287	1.14142	1.08333	0.027287	0.027287	7.12361	0.564428	10.5866	1.00395	2.11028	0.027287	0.29639	0.149004	2.29665	1.85774	2.74799	3.57595	0.889196	15.1686	7.08519	6.90779	1.10101	0.042993	1.16316	0.633359	5.1909	0.027287	0.604738	4.04517	0.328362	1.96232	1.66755	41.1942	0.516619	1.54926	0.027287	0.027287	1.81799	4.59105	1.3254	4.51762	0.027287	0.458675	3.18262
threonylvaline	Peptide	Dipeptide	0.145709	0.145709	0.145709	0.145709	0.145709	0.145709	0.145709	0.145709	0.689031	0.145709	1.98896	0.145709	0.145709	0.145709	0.145709	0.145709	2.38072	0.145709	0.145709	0.145709	0.145709	1.11793	0.145709	1.92345	0.145709	0.145709	0.145709	0.145709	0.752615	0.145709	0.145709	0.145709	0.145709	1	0.996277	2.71868	0.145709	0.145709	0.145709	0.145709	1.04981	0.145709	0.145709	3.08675	0.145709	0.145709	0.145709
thymidine	Nucleotide	Pyrimidine metabolism, thymine containing	0.336219	0.336219	0.336219	0.336219	0.336219	0.336219	0.336219	0.336219	0.336219	0.336219	0.583711	0.336219	0.336219	0.336219	0.336219	0.336219	0.336219	0.336219	0.336219	0.336219	0.336219	0.336219	0.336219	0.336219	0.336219	0.336219	0.336219	0.336219	0.336219	0.336219	0.336219	0.336219	0.336219	0.336219	0.336219	0.336219	0.336219	0.336219	0.336219	0.336219	0.336219	0.336219	0.336219	0.336219	0.336219	0.336219	0.336219
thymine	Nucleotide	Pyrimidine metabolism, thymine containing	0.84174	0.17325	1.31093	0.60716	0.591053	0.816755	0.39378	0.333526	0.909704	0.120065	1.75194	0.231704	0.272227	0.278271	0.23095	0.501403	4.61792	1.01331	1.02503	1.16851	0.665211	2.31862	0.893678	2.41814	1	0.300828	1	3.322	2.38259	0.553681	0.292401	0.824068	0.120065	4.48533	0.502823	0.514544	0.169075	0.753378	1.73237	0.539641	0.2862	0.120065	1.12291	0.647889	0.240594	0.288319	0.924579
trans-4-hydroxyproline	Amino acid	Urea cycle; arginine-, proline-, metabolism	0.417534	0.09714	0.09714	0.375209	0.09714	0.09714	0.547217	0.509638	0.531642	1.05311	0.09714	0.09714	0.477796	1.63633	0.303694	0.859469	0.650179	0.651396	0.09714	0.09714	0.09714	0.09714	0.09714	1.08546	1.20333	0.648149	2.24159	1.2381	0.09714	0.658397	1.60031	0.89039	0.466518	1.24812	0.339805	1.14625	2.13288	0.929955	0.09714	0.09714	0.855238	0.09714	2.44619	0.823117	1.12712	0.09714	0.09714
trans-urocanate	Amino acid	Histidine metabolism	1.59363	0.372541	0.372541	0.49264	0.721254	1.20939	0.372541	0.372541	0.372541	0.516471	0.372541	0.372541	1.01545	0.372541	0.881134	0.372541	0.372541	0.372541	0.372541	1.72401	0.372541	0.372541	0.531833	0.926749	0.657959	0.372541	0.577172	0.372541	0.372541	0.577073	0.372541	0.875251	0.831384	0.372541	0.372541	0.372541	0.863347	0.660926	0.372541	0.836091	0.372541	0.372541	0.372541	0.372541	0.766163	0.372541	0.995522
triethyleneglycol	Xenobiotics	Chemical	2.20169	1.66792	1.58634	4.34329	0.992407	1.40001	0.859597	1.15059	5.09954	0.403302	1.47018	1.60646	1.19705	1.91567	1.96144	1.64883	1.16077	2.38322	0.547385	0.909889	0.998759	4.36662	0.522591	0.591208	0.95496	1.22968	1.0104	0.461884	0.572018	0.664934	0.511888	0.404521	1.23987	2.04681	0.455794	0.825155	1.84092	0.392268	1.73043	0.653476	0.637817	0.556405	0.3658	0.358043	0.65785	0.482093	0.280247
trigonelline (N'-methylnicotinate)	Cofactors and vitamins	Nicotinate and nicotinamide metabolism	1.02547	0.192263	0.637367	1.94474	0.753257	0.128812	0.128812	0.13623	0.682936	0.351225	1.5594	0.509129	0.128812	0.756323	0.662669	1.10091	0.128812	1.1667	0.757044	1.44023	0.697847	0.74727	1	1.28286	2.10834	0.305299	0.998748	0.435252	0.128812	0.56221	0.365427	0.333296	0.832423	0.128812	0.783897	1	0.128812	0.419507	0.812191	0.128812	0.910281	0.488907	0.602903	0.360787	0.128812	1.09862	0.50754
tryptophan	Amino acid	Tryptophan metabolism	0.056051	0.204133	0.128889	0.735056	0.894297	0.452181	0.257373	0.25538	0.087015	0.360986	0.99616	0.138407	0.51607	0.125843	0.567409	0.049358	1.98184	0.066403	0.960305	0.08871	0.063592	0.179461	0.23248	0.41183	0.309262	0.073392	0.979522	0.30837	0.837232	0.385712	0.615457	0.059787	0.041142	0.994825	0.414917	0.664609	1.17249	1.06077	0.103689	0.466047	0.895404	0.103287	0.905935	0.369771	0.29294	0.189463	0.015959
tryptophan betaine	Amino acid	Tryptophan metabolism	0.256465	1.03721	0.216311	0.239962	2.24201	0.076111	0.472078	0.352495	0.348251	0.155592	3.42431	1.74787	1.17134	1.32039	0.374186	1.13188	1.7095	1.4023	2.62078	4.92919	0.741337	0.076111	0.525868	0.364675	4.98404	0.175666	3.92048	4.29618	5.35395	2.09622	2.91497	0.841055	1.66491	1.50743	0.905347	1.74962	1.01304	0.503285	1.41837	0.683725	0.973575	2.78501	6.47867	4.3353	1.06198	1.91501	2.2923
tryptophylasparagine	Peptide	Dipeptide	1	0.025257	0.025257	0.025257	0.025257	0.025257	0.598695	0.025257	1.21144	0.025257	4.34042	1.01039	0.844781	0.025257	0.025257	0.025257	5.13987	0.025257	4.32678	1.23066	0.741345	1.68773	1	3.68057	0.826204	0.025257	0.025257	1.3155	1.73116	0.025257	0.025257	0.949961	0.025257	1.0191	0.635246	5.17246	0.607568	1.57007	0.838699	0.025257	0.025257	1.85664	1.34432	1.64491	1.08627	0.691489	1
tryptophylglutamate	Peptide	Dipeptide	0.741895	0.246796	0.400449	0.246796	0.246796	1.29955	0.246796	0.246796	1.72377	0.246796	3.37712	0.70016	0.962748	0.246796	0.736238	0.83119	9.05986	1.11665	2.4797	0.246796	1.39816	3.71281	1.50743	2.89509	0.994523	0.294818	0.807398	0.246796	1.47562	0.246796	0.246796	1.44248	0.510802	1.34726	0.369648	2.10308	0.246796	2.19123	0.871051	0.594828	0.848268	2.17183	1.00266	0.725651	0.952985	1.0715	1.59851
tryptophylleucine	Peptide	Dipeptide	1	0.483877	0.839092	0.051779	0.051779	0.814497	0.051779	0.051779	0.922191	0.051779	2.68415	0.051779	0.918599	0.051779	0.809752	1.00172	8.42198	0.051779	1.40301	1.04925	0.596307	4.31379	0.985152	2.18731	1.18436	0.053141	0.051779	0.342173	1.34405	0.051779	0.636334	1.18807	0.774751	0.998278	0.328556	5.92912	0.051779	2.16615	0.051779	0.051779	0.051779	1.4507	0.926585	1.22272	0.051779	0.051779	2.29324
tyrosine	Amino acid	Phenylalanine & tyrosine metabolism	0.337573	0.184419	0.196398	0.52316	0.650165	0.454798	0.372689	0.35391	0.497924	0.444403	1.12442	0.527142	0.537688	0.552662	0.390997	0.390016	1.37274	0.392137	1.19489	0.362727	0.588798	0.966293	0.692034	0.971187	0.598877	0.540235	0.871044	0.751094	0.851493	0.406997	0.349058	0.513901	0.441626	0.773226	0.464535	1.00973	0.761606	0.973126	0.46483	0.44134	0.442399	0.787285	0.752869	0.59286	0.434562	0.47904	0.589678
tyrosylalanine	Peptide	Dipeptide	1.46949	0.187682	0.90286	0.187682	0.856494	0.672173	0.351501	0.187682	1.54279	0.366927	5.236	1.13674	1.14674	0.737091	0.635935	0.508139	11.7132	0.558826	1.58745	1.14029	0.977467	3.38447	1.74371	5.39372	1.0121	0.187682	1.50045	1.52964	1.57203	0.895513	0.946188	1.44183	1.04336	3.02169	0.361021	5.23065	0.806493	2.48966	0.729493	0.626167	0.643473	2.87713	2.13366	1	0.514037	0.610287	1.96366
tyrosylglutamine	Peptide	Dipeptide	0.917603	0.625352	0.508273	0.587788	0.546373	0.897065	0.639415	0.13069	1.59339	0.669495	5.70393	1.65581	1.58061	1.11173	0.621462	0.718734	7.64581	0.973631	3.12641	1.23401	1.46095	2.47262	1.86552	4.73769	0.869764	0.240197	1.61898	1.92999	1.5798	0.32664	0.506106	1.99279	0.786345	2.35786	0.458843	4.89767	1.053	1.43783	1.02959	0.624091	1.09004	3.23644	1.90624	1.08865	1.36247	1.33227	2.35261
tyrosylglycine	Peptide	Dipeptide	0.813128	0.3843	0.668287	0.60599	0.642666	0.810639	0.310937	0.687629	1.32264	1.00533	3.3295	0.953543	1.09265	0.716225	0.770692	0.570134	10.7964	1.28895	1.94054	1.17386	1.03465	1.57875	1.00302	2.49433	0.877457	0.331879	1.02637	1.31608	1.38329	0.304234	0.518258	1.02029	0.663914	2.04349	0.74598	3.18865	0.849722	1.11715	0.848842	0.965747	0.901109	1.74489	1.35585	0.947212	0.693525	0.994666	0.842133
tyrosylhistidine	Peptide	Dipeptide	0.677107	0.567592	0.397338	0.835645	2.3779	0.907261	1.11054	0.138086	4.66888	3.44682	9.16389	2.00485	1.79651	3.42756	1.10906	0.373918	7.10839	0.658343	3.58409	5.76507	0.907107	3.12738	1.1139	2.39315	0.831159	0.253919	2.71223	1.93958	0.971964	2.13605	1.17018	1.4748	0.91747	0.823631	0.779159	2.3305	4.52928	8.10462	0.862554	0.825088	0.996496	2.2441	1.60258	2.87694	2.61778	1.81107	1.55952
tyrosylleucine	Peptide	Dipeptide	1.6812	0.590714	0.598594	0.657434	0.005364	1	0.005364	0.005364	2.37916	0.589329	11.5519	1.26712	1.67262	0.522054	0.672723	0.361357	9.78297	1.00692	3.7523	2.40923	0.898634	13.0493	5.12102	11.107	1.45849	0.09878	0.925319	1.78039	4.70407	0.427661	0.575863	3.92613	0.563615	2.90733	0.974199	13.1495	0.832642	2.67108	0.945441	0.005364	1.44913	7.40017	2.51524	1.40309	0.954589	0.939182	5.14544
tyrosyllysine	Peptide	Dipeptide	0.263032	0.263032	0.263032	0.263032	0.263032	0.263032	0.263032	0.263032	0.263032	0.910606	0.263032	0.263032	0.263032	0.263032	0.263032	0.263032	0.263032	0.263032	0.263032	0.84907	0.263032	0.263032	0.263032	0.263032	0.263032	0.263032	0.263032	0.263032	0.263032	0.263032	0.263032	0.263032	0.84327	4.88017	0.263032	0.263032	0.263032	0.263032	0.263032	0.263032	0.94283	0.263032	0.263032	1.59306	0.263032	1	0.263032
tyrosylphenylalanine	Peptide	Dipeptide	1.0473	0.443187	0.907156	0.159411	0.365045	0.677183	0.159411	0.159411	2.92552	0.475206	2.79599	1.41716	1.59228	0.159411	0.681327	0.278382	7.25861	1.25957	1.39918	1.02398	1.12605	6.03595	1.97431	4.55411	0.933399	0.436658	0.751544	0.159411	1.28046	0.159411	0.761737	1.58893	1.01688	1.15104	0.999395	6.44781	0.805606	2.36301	0.159411	0.159411	1.33323	3.58402	1.20256	1.25068	1.28367	0.505466	2.68807
tyrosyltyrosine	Peptide	Dipeptide	0.130585	0.130585	0.130585	0.130585	0.130585	0.130585	0.130585	0.130585	0.130585	0.130585	1.6396	0.130585	0.130585	0.130585	0.130585	0.130585	8.2569	0.130585	2.11287	0.749843	0.130585	1.60964	1.02862	2.16829	0.517149	0.130585	0.130585	0.130585	0.93828	0.130585	0.130585	1.43553	0.130585	1.86177	0.568595	3.827	0.130585	0.960189	0.130585	0.130585	0.130585	1.66597	0.653117	1.18319	0.130585	0.130585	1.73235
tyrosylvaline	Peptide	Dipeptide	0.46617	0.158468	0.49563	0.158468	0.158468	0.984149	0.158468	0.158468	1.59172	0.692064	5.77211	1.35487	1	0.422231	0.786404	0.373045	9.98764	0.929745	2.87364	1.28558	0.809843	2.20313	1.8748	6.82151	0.886406	0.158468	1.22388	1.89188	2.55404	0.531281	0.158468	0.972884	0.158468	2.67103	0.43101	3.92514	0.616032	1.19375	0.747492	0.235126	0.158468	4.26692	1.75492	1.3464	1.00621	1	1.89658
undecanedioate	Lipid	Fatty acid, dicarboxylate	1.40401	1.20621	0.431844	1	0.795979	0.431844	0.431844	1.40924	0.826062	1.75551	0.784206	0.431844	0.431844	0.770882	0.431844	0.689043	2.31785	0.431844	0.907432	1.4389	0.957515	1.25838	1.01011	1.61059	1.1965	0.830824	0.926926	1.9832	2.50686	0.431844	0.431844	0.813048	0.431844	1.25962	0.964172	0.884919	1.02768	1.48626	0.896061	0.431844	1.29891	0.931202	1.0464	1.7698	1.1119	1.75475	1.00358
uracil	Nucleotide	Pyrimidine metabolism, uracil containing	0.413911	0.093728	0.277595	0.470021	0.695612	0.453903	0.345171	0.372115	0.618019	0.252717	1.15566	1.08678	0.341435	0.588497	0.387345	0.194986	2.28021	0.555368	0.835818	0.367686	0.582473	0.846256	0.538477	0.81555	0.566786	0.317254	0.746232	1.11216	0.989401	0.28047	0.288119	0.758053	0.198007	1.81479	0.500482	1	0.409227	0.407093	0.857056	0.43711	0.214645	1.01889	1.79078	0.759082	0.395131	0.407944	1.45319
urate	Nucleotide	Purine metabolism, urate metabolism	0.755026	1.0349	0.366683	1.28601	0.817528	0.732476	0.806555	1.08726	0.996815	1.50149	0.935965	1.16489	1	0.991545	1.52771	0.751917	0.652852	1.33404	0.309091	0.415004	1.6831	0.674594	0.590016	0.649839	1.31007	0.878418	0.521702	0.617219	0.875291	0.572111	1.2804	0.583042	1.67921	0.809506	1.39342	0.850143	1.16642	1.28107	1.06859	1.09259	1.4433	0.331522	1.09174	0.989831	0.540541	1.01074	0.788315
urea	Amino acid	Urea cycle; arginine-, proline-, metabolism	0.270574	0.21535	0.067879	0.721466	0.685992	0.807788	0.513211	0.901138	0.555232	0.818105	0.661113	0.778841	0.067063	1.98176	0.652179	1.21991	0.937909	0.893094	0.70462	0.078311	0.851982	0.592195	0.592522	0.525865	0.675475	0.843677	0.302366	0.543378	0.571769	0.419426	0.727154	0.532571	1.48521	1.08202	1.56838	1.24889	0.433768	0.941996	0.823747	0.643472	1.11421	0.350479	1.20666	1.17174	1.18707	0.885734	1.13952
uridine	Nucleotide	Pyrimidine metabolism, uracil containing	0.874571	0.536816	0.480395	0.822929	0.720339	1.04705	0.888953	0.592664	1.0406	0.730624	1.2273	1.05519	0.879728	0.805569	0.694171	0.848853	1.70543	0.884969	1.22691	1.10877	0.822848	2.04826	1.00868	1.35839	1.04534	1.00176	1.33166	1.04471	1.60081	0.306117	0.589275	0.854747	0.549623	0.994511	0.893334	0.790629	0.529216	0.890382	1.28896	0.852681	0.379472	0.921091	1.03967	0.923827	0.935398	0.767094	0.912119
uridine monophosphate (5' or 3')	Nucleotide	Pyrimidine metabolism, uracil containing	2.31441	0.141381	0.781691	0.141381	3.08017	1.83341	3.8879	0.141381	1.96135	3.24004	0.97683	5.8514	1.04658	3.78298	2.30886	5.05137	2.07403	1.26351	5.62748	4.50027	5.34286	1.04297	4.1974	2.81614	2.33419	2.97504	0.536369	2.00364	2.54646	2.41494	2.33101	2.50377	3.6173	1.08951	1.85916	1.40885	1.24991	4.33182	2.31185	2.27936	2.75067	2.43761	3.84734	0.823626	6.34126	4.39355	4.24551
valerylcarnitine	Lipid	Fatty acid metabolism	0.399222	0.150724	0.150724	0.519147	0.282761	0.371104	0.150724	0.227527	0.406472	0.465421	1.87461	0.38768	0.341384	0.262684	0.150724	0.238134	2.98748	0.235929	0.979649	0.150724	0.442067	0.59088	0.664987	0.964228	0.92043	0.406942	0.396043	0.874052	0.399817	0.150724	0.357385	0.668881	0.37702	0.728849	0.150724	2.13359	0.255933	1.02498	0.376596	0.383239	0.150724	3.73151	1.10132	0.615997	0.850174	0.268497	0.693689
valine	Amino acid	Valine, leucine and isoleucine metabolism	0.387566	0.260958	0.249823	0.689207	0.890435	0.52838	0.482925	0.544557	0.551995	0.494897	1.07351	0.785076	0.624572	0.797036	0.556412	0.494427	1.14734	0.601151	1.14736	0.446597	0.694261	0.909675	0.772286	0.851821	0.637332	0.598387	0.986228	0.767207	0.70773	0.422786	0.504581	0.466697	0.58407	0.784624	0.654596	0.83434	1.0016	0.911426	0.706569	0.600198	0.602743	0.750974	0.743059	0.713723	0.544643	0.68817	0.670072
valylalanine	Peptide	Dipeptide	0.738665	0.30059	0.397702	0.366467	0.175184	0.849662	0.0923	0.049803	3.71091	0.799203	5.72587	1.15232	0.894333	0.685715	0.410427	0.410848	13.5246	1.45396	4.27458	1.11441	1.00452	4.05477	2.70061	6.4349	1.12813	0.104781	1.96821	1.91447	2.73847	0.202376	0.34084	2.52789	0.574037	3.81632	0.493494	15.8854	0.666806	0.919907	0.385908	0.246943	1.13257	4.20484	1.89738	1.25128	0.972061	0.80177	1.21416
valylarginine	Peptide	Dipeptide	0.14835	0.14835	0.14835	0.304185	1.43416	1.31976	3.28743	0.665191	1.59533	0.14835	2.95886	2.20329	0.988478	0.14835	0.771792	1.09201	9.3932	0.495922	10.024	0.393664	1.64101	1.55889	1.46488	1.40288	0.839489	2.21349	1.58214	3.79871	1.66471	0.25672	0.467495	0.872195	0.859896	2.30165	0.94885	2.31688	0.523719	0.47709	2.48086	0.5182	0.749749	1.64047	1.82837	1.01634	0.614603	1.21344	0.907735
valylasparagine	Peptide	Dipeptide	0.259797	0.259797	0.259797	0.259797	0.259797	0.259797	0.259797	0.259797	0.855251	0.259797	4.02	0.622446	0.399091	0.259797	0.259797	0.259797	0.259797	0.259797	2.19081	0.621698	0.684913	0.259797	0.889307	2.13226	0.946959	0.259797	0.871069	0.59106	1.53395	0.259797	0.259797	0.760792	0.259797	2.33315	0.259797	5.5736	0.259797	0.403467	0.259797	0.259797	0.259797	1.25425	1.16758	0.259797	0.259797	0.259797	1
valylaspartate	Peptide	Dipeptide	0.276385	0.377478	0.393349	0.347977	0.093584	1.22124	0.356419	0.105291	1.90312	0.461461	3.15057	0.972595	1.17924	0.329782	0.612933	0.703444	6.79641	1.27522	2.48878	0.669449	1	1.5965	1.5493	3.35932	1.15669	0.137442	1.4686	0.985208	1.94786	0.093584	0.570762	1.13249	0.61681	3.84894	1.0211	9.03781	0.559757	0.802289	0.479691	0.356835	1	2.6292	1.23561	2.98573	0.885384	0.52821	1
valylglutamate	Peptide	Dipeptide	0.815455	0.247219	0.319341	0.340953	0.550456	0.809157	0.271126	0.041037	1.96232	0.538184	3.77262	1.30368	0.802635	0.724734	0.360586	0.427887	8.26934	0.882343	4.44845	0.619844	1.64649	3.78172	2.83647	5.78788	1.0788	0.16201	1.42564	2.3633	2.39966	0.041037	0.477823	2.42815	0.468784	3.33587	0.663898	9.21815	0.488367	1.00108	0.525207	0.378175	1.41973	6.50547	1.84055	1.77225	0.740098	0.787389	2.32562
valylglutamine	Peptide	Dipeptide	0.789119	0.276963	0.430308	0.324489	0.286799	0.786236	0.351111	0.083159	2.04682	0.655739	5.4418	1.44948	1.35263	0.808938	0.331785	0.530845	9.04377	1.34056	4.97386	0.915355	1.11867	2.29121	2.75179	4.31714	1.05251	0.143617	1.12395	1.61	2.69759	0.083159	0.615305	2.30342	0.537512	3.48869	0.730283	16.2978	0.461992	0.578762	0.609575	0.388543	1.0414	3.50568	2.01457	1.33409	0.838997	0.975038	1.50076
valylglycine	Peptide	Dipeptide	0.263741	0.099723	0.31081	0.22627	0.084208	0.494233	0.195756	0.099566	1.25643	0.529603	2.71025	0.727208	0.56625	0.439566	0.343726	0.306269	7.61772	0.678808	1.79207	0.496982	0.53275	1.34626	1.34207	2.43204	0.387516	0.137378	1.29353	1.02129	1.09987	0.201733	0.127547	0.855452	0.306378	1.19336	0.748152	4.96483	0.403752	0.598362	0.310554	0.29817	0.608314	1.84627	1.08757	4.5077	0.396736	0.382305	0.672216
valylhistidine	Peptide	Dipeptide	0.206004	0.206004	0.206004	0.206004	0.206004	0.206004	0.206004	0.206004	0.634316	0.466984	2.46511	0.416786	0.559062	0.206004	0.206004	0.206004	0.206004	0.206004	1.20444	0.85142	0.439714	0.65294	0.545261	1.33645	0.206004	0.206004	0.726495	0.495988	1.0334	0.206004	0.206004	0.86045	0.206004	1.40682	0.206004	2.98242	0.866357	0.6147	0.222061	0.206004	0.206004	1	1.12875	0.206004	0.206004	0.206004	0.629364
valylisoleucine	Peptide	Dipeptide	0.703574	0.294929	0.494629	0.014228	0.468035	0.825028	0.014228	0.014228	2.24151	0.864071	10.3438	0.806206	1.10623	0.014228	0.680415	0.520416	5.69347	0.947855	2.53003	1.16866	0.657427	6.76032	3.00955	7.51263	1.36888	0.05647	0.632362	0.522367	4.20395	0.472897	0.513708	2.39045	0.447232	3.70445	1.58075	14.0846	0.014228	0.721609	0.290564	0.208959	0.014228	4.03079	1.61111	4.89255	0.696489	0.395647	2.32336
valylleucine	Peptide	Dipeptide	0.807827	0.776425	0.59722	0.252314	5.0211	1.25462	0.087614	0.002289	6.89335	1.07919	15.5859	1.22167	2.31221	0.724982	0.470647	0.38478	2.98703	1.60547	4.66773	3.37993	0.934442	12.7569	9.37996	13.9369	2.86043	0.071554	1.24353	1.07389	6.80066	0.415756	0.588184	5.22599	0.453114	6.67796	2.46703	42.0219	0.92571	1.75268	0.394483	0.277575	2.90598	7.68045	4.71575	4.44982	1	0.689285	3.20561
valyllysine	Peptide	Dipeptide	0.710904	0.2818	0.2818	0.2818	0.2818	0.2818	0.2818	0.2818	1.77409	0.592095	4.1094	0.972915	0.848636	0.784319	0.2818	0.2818	0.2818	0.2818	2.27	0.485703	0.564453	0.2818	0.70703	1.18019	0.480339	0.2818	0.956215	0.830629	0.948403	0.487894	0.2818	1.06295	0.2818	1.93546	0.2818	6.49733	1.28919	0.818551	0.301008	0.2818	0.2818	0.907086	1.31088	0.2818	0.2818	1.4061	1
valylmethionine	Peptide	Dipeptide	0.63251	0.424043	0.375112	0.440887	0.076492	1.17621	0.076492	0.076492	3.93095	1.31056	14.9188	1.27534	2.15266	0.555215	0.548827	0.442541	10.4759	1.64559	5.56946	1.08911	1.05877	5.11274	5.78933	12.9002	1.49714	0.132734	1.47995	1.81446	6.97982	0.48343	0.29725	2.95244	0.555422	5.75152	0.575617	36.9779	0.666137	1.11959	0.681106	0.076492	1.52635	7.4256	4.13611	1.25021	0.652309	0.969575	2.46552
valylphenylalanine	Peptide	Dipeptide	0.907809	0.407262	0.429057	0.05297	0.614289	1.00638	0.239143	0.05297	3.11331	0.418653	13.4661	1.38324	1.11036	0.493665	0.427985	0.833775	6.5394	1.11528	5.75451	1.1054	0.927084	9.26169	5.57637	12.3495	2.80367	0.08058	0.795946	1.25291	6.83237	0.05297	0.535576	3.40108	0.700015	7.9482	0.659532	30.307	0.535685	0.985025	0.603533	0.28788	1.3303	6.66733	3.28718	1.74878	0.919805	0.558722	3.47665
valylserine	Peptide	Dipeptide	0.676194	0.301327	0.32607	0.301185	0.301185	0.451754	0.301185	0.301185	1.33328	0.721789	6.39598	1.00351	0.912792	0.301185	0.301185	0.301185	0.301185	0.662519	3.90006	0.994854	0.948799	0.70329	1.69543	2.97628	0.962297	0.301185	1.15512	1.027	2.84947	0.301185	0.310143	1.86003	0.301185	4.41387	0.301185	8.81593	0.301185	0.852026	0.368735	0.301185	0.68736	2.4612	2.23475	0.301185	0.532365	0.652719	2.03477
valyltryptophan	Peptide	Dipeptide	0.071271	0.86084	1.10528	0.490478	0.071271	1.21909	0.071271	0.071271	3.091	0.7963	12.1195	1.11347	1.25698	0.071271	0.315997	0.291259	7.80015	1.05019	4.90375	1.39283	1	11.3706	4.72174	15.0135	1.19365	0.120072	0.679563	0.870785	11.952	0.071271	0.829308	2.15823	0.459943	4.16142	0.461627	23.5562	0.987652	1.03847	0.071271	0.581177	0.745822	5.63685	2.18054	1.27736	0.47184	1.68149	2.54473
valyltyrosine	Peptide	Dipeptide	0.421626	0.53743	0.086847	0.086847	0.584288	1.09159	0.086847	0.086847	2.81202	0.086847	12.5487	1.82527	1.87927	0.549437	0.316677	0.699191	6.02131	1	4.29892	1.40836	0.682642	8.2492	3.6857	11.633	1.26716	0.137251	0.602691	0.904131	5.39732	0.086847	0.086847	1.97763	0.086847	4.35488	1.26142	14.75	0.086847	0.787804	0.579454	0.086847	1.2774	6.20327	2.25358	3.37708	0.086847	1.06455	3.11475
valylvaline	Peptide	Dipeptide	0.561859	0.172906	0.259322	0.040152	0.255002	0.427728	0.040152	0.040152	2.35604	0.726042	9.80003	0.970186	1.03118	0.602579	0.183151	0.040152	6.4984	1.5232	4.2728	2.12306	0.671848	4.34252	3.73561	5.1836	1.38135	0.040152	0.858478	0.827781	3.28723	0.246634	0.186797	2.33135	0.523823	2.83648	0.965562	9.26983	0.805379	1.34241	0.423712	0.040152	1.00021	3.27824	2.13607	7.6256	0.369694	0.326128	1.38333
vanillylmandelate (VMA)	Amino acid	Phenylalanine & tyrosine metabolism	0.081225	0.081225	0.081225	0.081225	0.216776	0.081225	0.081225	0.081225	0.081225	0.081225	0.081225	0.516207	0.081225	0.081225	0.16571	0.081225	0.081225	0.081225	0.081225	0.081225	0.172423	0.081225	0.081225	0.081225	0.081225	0.081225	0.081225	0.419573	0.081225	0.081225	0.143978	0.081225	0.081225	0.081225	0.081225	0.081225	0.081225	0.179711	0.081225	0.081225	0.081225	0.081225	0.081225	0.081225	0.081225	0.081225	0.081225
venlafaxine	Xenobiotics	Drug	0.742814	0.742814	0.742814	0.742814	0.742814	0.742814	0.742814	0.742814	0.742814	0.742814	0.742814	0.742814	0.742814	0.742814	0.742814	0.742814	0.742814	0.742814	0.742814	0.742814	0.742814	0.742814	0.742814	0.742814	0.742814	0.742814	0.742814	0.742814	0.742814	0.742814	0.742814	0.742814	0.742814	0.742814	0.742814	0.742814	0.742814	0.742814	0.742814	0.742814	0.742814	0.742814	0.742814	0.742814	0.742814	0.742814	0.742814
VGAHAGEYGAEALER*	Peptide	Polypeptide	0.445886	1.43358	0.129036	0.214364	3.07861	1.09555	2.78382	0.266784	2.45345	1.56619	1.97284	2.70734	2.00606	3.66387	1.19017	0.129036	0.129036	0.772468	0.129036	0.129036	0.129036	1.51278	0.679666	0.129036	1.24691	0.129036	1.21768	1.02395	0.129036	5.20759	1.22628	0.530612	0.971384	0.129036	1.12396	0.129036	2.46889	1	0.129036	0.129036	0.930735	0.129036	0.129036	0.86737	0.340765	4.33392	0.129036
xanthine	Nucleotide	Purine metabolism, (hypo)xanthine/inosine containing	0.532694	0.317652	0.53407	0.71095	0.38104	0.617045	0.537886	0.502593	0.504265	0.461094	0.869194	0.521834	0.317742	0.972506	0.546403	0.530496	0.562426	0.446019	0.979454	0.557938	0.618162	0.722564	0.818822	0.984846	0.73045	0.436682	0.88973	1.038	1.07969	0.264002	0.24389	1.06144	0.309264	0.787046	0.579959	1.35267	0.849585	0.844014	0.73232	0.493845	0.443612	1.03684	0.851538	0.719636	0.452658	0.524484	0.925297
xanthosine	Nucleotide	Purine metabolism, (hypo)xanthine/inosine containing	0.187761	0.129266	0.129266	0.425503	0.273586	0.556452	0.13353	0.343723	0.551957	0.164733	1	0.212696	0.129266	0.129266	0.129266	0.438739	1.19983	0.178908	0.309426	0.216493	0.129266	0.457961	1.80544	0.819226	0.658189	0.129266	0.277942	0.698519	0.844925	0.129266	0.199531	1.1696	0.254338	0.899851	0.129266	1.40465	0.316585	0.667777	0.360953	0.129266	0.680853	2.36479	1.10057	0.332191	0.366413	0.129266	1.48734
xylitol	Carbohydrate	Nucleotide sugars, pentose metabolism	0.417182	0.049058	0.138601	0.313021	0.420563	0.219635	0.173731	0.164637	0.285729	0.142269	0.769819	0.762949	0.145345	0.431516	0.136441	0.735806	0.883362	0.348337	3.0873	0.09022	0.498359	0.706652	1.02372	1.03132	0.47096	0.709997	0.380293	1.53574	0.523615	0.057613	0.131307	0.867326	0.30151	0.987482	0.246907	1.46373	0.200991	0.256206	0.518506	0.128421	1.89544	1.10024	0.868135	0.473803	0.654514	0.609703	1.11264
xylonate	Carbohydrate	Nucleotide sugars, pentose metabolism	0.843831	0.557317	0.342174	0.585911	1.68441	1.01636	0.779977	0.555599	0.545413	0.980783	0.78735	1.63468	0.480919	1.61728	0.997553	2.81432	1.50417	0.965433	0.967738	1.34126	1.04912	0.37645	1.3929	1.00245	2.20839	0.745544	0.841478	1.72782	0.999364	1.54066	0.991484	1.08054	0.505916	1.15657	0.774621	1.33609	0.990448	0.885291	0.329532	1.03084	1.81076	1.18166	0.929164	0.819735	1.32005	1.25531	1.19743
xylose	Carbohydrate	Nucleotide sugars, pentose metabolism	0.15544	0.15544	0.206965	0.15544	1.40014	0.15544	0.388595	1	0.15544	0.15544	0.15544	1.12678	0.684663	0.15544	0.15544	0.737836	0.719425	0.15544	1.62152	0.15544	0.748863	0.7376	0.882603	0.15544	1.25692	0.15544	0.15544	0.528344	0.764458	0.544216	0.15544	0.15544	0.15544	1.21346	0.32446	1.15994	0.256081	0.15544	0.15544	0.478328	1	0.378649	0.997982	0.997559	0.384048	0.15544	0.15544
xylulose	Carbohydrate	Nucleotide sugars, pentose metabolism	0.709599	0.48549	0.312908	0.583629	2.61089	1.30017	1.00287	0.519351	0.988131	1.13487	0.942462	1.47154	0.743049	1.61815	0.78705	0.997132	0.997825	1.28197	2.81691	0.737385	1.27314	1.11695	1.81832	2.25431	0.441865	1.90224	1.72489	2.99133	1.90601	0.416802	0.757213	0.930139	1.05301	0.878486	2.40658	1.33095	1.49674	2.80848	2.56353	2.06686	0.764751	0.816272	1.7275	1.32043	2.53928	1.51411	1.14846
X - 01497			1.44561	0.010737	0.221572	0.010737	0.177762	0.801795	0.128508	0.155672	0.881096	0.247935	1.14714	0.692695	0.010737	0.913114	0.010737	0.785135	1.80924	0.604497	1.99827	0.197444	1.0835	0.836402	1.24042	2.21675	0.782081	1.02875	0.565596	1.46521	1.14123	0.036384	0.010737	1.1358	0.80769	1.51554	0.526788	1.59983	0.287117	0.927678	0.75743	0.104741	0.618913	2.10406	0.944741	0.482001	1.35389	0.391821	1.08245
X - 02249			1.10739	0.608344	0.587823	0.949248	0.530616	1.17957	1.2639	0.29491	2.7857	3.99672	1.11538	1.17352	0.72701	1.79944	2.13903	2.32467	0.29491	1.18409	0.788063	0.785595	1.53546	0.785415	1.00398	0.29491	0.963448	1.12909	1.63566	0.537473	0.493522	0.435128	1.94912	0.607491	2.94449	0.29491	1.399	0.29491	1.291	2.99618	0.775321	1.55655	2.09024	0.29491	0.680023	1.87684	0.29491	1.35523	1.73806
X - 02269			1.57105	0.869927	0.125445	0.125445	0.441446	0.526992	4.77017	3.08682	2.55876	1.00381	0.125445	0.125445	1.16918	0.125445	0.125445	0.694933	0.125445	0.974831	0.125445	0.125445	1.12369	1.41698	0.125445	0.125445	0.125445	0.125445	0.125445	0.125445	0.125445	0.125445	0.125445	0.125445	1.14456	0.125445	0.125445	0.125445	0.690606	4.63499	1.0086	1.56718	1.25627	0.125445	0.125445	0.89822	1.56917	1	0.125445
X - 03056			0.397934	0.397934	0.397934	0.925396	0.720395	0.82763	0.397934	1.00112	0.577484	1.78596	0.999317	1.49001	0.397934	1.44552	1.03382	0.777216	0.397934	0.63556	0.745554	0.397934	0.67331	0.397934	0.397934	0.966183	1.40916	1.06559	1.17655	0.397934	0.675411	1.0141	0.397934	0.397934	1.74449	1.09165	0.397934	0.397934	0.984057	1.1546	0.423127	1.33881	1	0.397934	0.778703	0.397934	1.25235	0.814756	1.25814
X - 10445			0.431808	0.125173	0.13263	0.334976	0.260994	0.806763	0.218538	0.224317	0.853392	0.256552	1.26715	0.533954	0.238598	0.297124	0.224907	0.402983	4.10532	0.212241	0.53644	0.277133	0.713638	0.840608	1.80395	1.66498	0.460244	0.341815	0.419453	0.875676	0.757898	0.095071	0.129744	0.413907	0.676904	0.605568	0.316702	1.20002	0.224528	0.235754	0.258279	0.13215	0.43952	2.6374	0.453501	0.685424	0.20932	0.171377	1.8659
X - 11204			0.886692	2.19576	0.940066	1.21478	0.997493	1.41011	1.3012	3.86691	2.22797	1.19844	1.52915	1.20837	2.15454	1.08601	1.42793	0.631876	1.89402	1.34387	1.07325	1.64906	0.811116	1.68242	0.5976	1.11274	0.791036	0.680484	1.44328	0.827996	0.920335	1.27658	1.90402	0.511061	0.945374	1.09896	1.14228	1.20989	1.26139	1.69553	0.922169	1.28717	0.792196	1.2056	0.528527	1.33944	1.41397	1.29617	0.672735
X - 11261			1.25631	0.761716	0.453398	0.883798	2.01545	4.74204	2.69273	0.575872	1.47871	2.63937	1.74168	4.86529	1.82879	2.26178	1.35409	1.11518	7.88901	1.29753	1.85553	4.66777	6.4987	2.57215	11.4809	3.62942	4.13537	1.90309	2.07774	3.01525	0.570994	0.228338	0.604872	5.52764	1.70688	0.352957	1.20978	0.316523	2.09485	1.46506	0.760193	0.954942	0.616473	4.94347	10.9644	1.30224	2.62655	5.99251	13.7026
X - 11299			0.326066	0.326066	0.326066	0.326066	0.326066	0.326066	0.326066	0.326066	0.326066	0.326066	0.326066	0.326066	1.2197	0.326066	0.326066	0.326066	1	0.326066	0.326066	0.326066	0.326066	0.326066	0.326066	0.326066	1	0.326066	0.326066	0.326066	0.326066	0.555621	0.326066	0.326066	1.03784	0.326066	1.22785	0.326066	0.326066	0.326066	0.931372	0.411195	0.838776	0.326066	0.326066	0.326066	0.326066	0.326066	0.326066
X - 11315			0.978693	0.675286	0.309293	0.89864	0.802606	1.83681	1.28973	1.0709	1.55173	1.14896	2.46806	1.14422	0.802558	0.945659	0.959563	1.70225	0.685921	1.31926	1.54081	0.906675	1.0288	1.16123	0.785298	0.964949	1.81405	0.996948	0.672577	0.704036	1.27536	0.434053	1.92646	1.13508	2.48301	0.999824	1.34063	1.49121	1.07545	3.57375	0.938111	1.03221	2.197	0.546088	1.37397	0.847194	1.61008	0.956591	1.18307
X - 11332			0.832022	0.832022	0.832022	0.832022	0.832022	0.832022	0.832022	0.832022	0.832022	0.832022	0.832022	0.832022	0.832022	0.832022	0.832022	0.832022	0.832022	0.832022	0.832022	0.832022	0.832022	0.832022	0.832022	0.832022	0.832022	0.832022	0.832022	0.832022	0.832022	0.832022	0.832022	0.832022	0.832022	0.832022	0.832022	0.832022	0.832022	0.832022	0.832022	0.832022	0.832022	0.832022	0.832022	0.832022	0.832022	0.832022	0.832022
X - 11333			0.325257	0.220275	0.220275	0.733433	0.220275	0.38661	0.365349	0.355419	0.52128	0.220275	0.220275	0.714464	0.220275	0.220275	0.220275	0.220275	0.751439	0.641136	0.220275	0.238035	0.803031	0.34807	0.502764	0.220275	0.220275	1.39758	0.392774	0.7371	0.220275	0.220275	0.220275	0.220275	0.220275	0.220275	0.220275	0.220275	0.220275	0.609577	0.220275	0.271273	0.343399	0.561078	0.483027	0.574244	0.406725	0.220275	0.528684
X - 11334			0.489887	0.339637	0.26433	0.404621	0.677264	0.881213	0.680471	0.26433	0.384155	0.26433	0.26433	0.431487	0.26433	0.683122	0.26433	1.09811	1.02054	0.362042	0.835723	0.458461	0.614552	1	1.0239	1.06449	0.433197	0.26433	1	1.01025	0.631892	0.26433	0.287277	0.384661	0.507645	1.02674	0.26433	0.26433	0.26433	0.653554	0.920851	0.26433	0.26433	0.699663	0.330702	0.26433	0.26433	0.908853	1.73532
X - 11372			0.970342	2.72148	0.384464	3.62382	1.0368	0.402448	1.09678	2.82136	0.843633	4.60771	1.5977	2.67931	3.33201	1.60454	3.98329	1.997	0.193085	1.87812	0.705842	1.64218	1.67033	0.456769	0.807298	2.83819	2.11453	1.66556	1.91085	0.415124	0.751216	1.02182	3.23708	0.843091	2.39488	0.923148	3.24051	0.52163	3.15293	1.12521	1.37465	2.72449	1.60567	0.90762	0.483415	1.4463	0.309024	1.96508	2.0433
X - 11381			1.07638	0.752601	0.465112	0.704936	1.51596	0.662372	0.753984	0.752272	1.13722	1.32913	1.09382	2.20795	1.67448	1.10316	1.23631	1.65066	2.25963	2.13981	3.21582	1.94884	1.56213	0.621473	1.01129	2.59251	1.64019	1.45322	1.252	2.14502	1.53208	0.564731	0.934791	1.46387	0.810857	1.30001	1.338	0.767344	1.13105	0.840798	1.20935	1.53752	0.898059	0.913518	2.29765	1.2323	1.06841	1.19565	2.96734
X - 11423			0.541682	0.541682	0.541682	0.541682	0.541682	0.541682	0.541682	0.541682	0.541682	0.541682	0.716944	0.541682	0.541682	0.541682	0.541682	0.541682	0.541682	0.541682	0.541682	0.541682	0.541682	0.541682	0.541682	0.541682	0.541682	0.541682	0.541682	0.541682	0.541682	0.541682	0.541682	0.541682	0.541682	0.541682	0.541682	0.541682	0.541682	0.541682	0.541682	0.541682	0.541682	0.541682	0.541682	0.541682	0.541682	0.541682	0.625978
X - 11437			0.466732	0.185357	0.185357	1.02134	0.185357	0.185357	0.185357	0.185357	0.185357	0.185357	0.869313	0.185357	0.185357	0.185357	1.7011	0.185357	0.185357	0.185357	0.185357	0.602463	0.185357	0.185357	0.185357	0.669171	0.185357	0.185357	0.676679	0.732052	1.49094	1.07547	0.873133	0.185357	0.185357	0.185357	0.185357	0.185357	0.185357	0.55301	0.185357	0.185357	0.185357	0.185357	0.185357	0.185357	0.185357	0.185357	0.726009
X - 11440			0.505569	0.505569	0.505569	0.505569	0.505569	0.505569	0.505569	0.505569	0.505569	0.524906	0.690303	0.505569	0.505569	0.505569	0.505569	0.505569	0.505569	0.505569	0.505569	0.505569	0.505569	0.505569	0.505569	0.505569	0.505569	0.505569	0.505569	0.505569	0.505569	0.505569	0.505569	0.505569	0.505569	0.505569	0.505569	0.505569	0.505569	0.505569	0.505569	0.505569	0.505569	0.505569	0.505569	0.505569	0.505569	0.505569	0.505569
X - 11444			0.245495	0.245495	0.245495	0.755018	0.245495	0.245495	0.245495	0.245495	0.245495	0.245495	0.245495	0.245495	0.245495	0.245495	0.245495	0.245495	0.245495	0.245495	0.245495	0.245495	0.245495	0.245495	0.245495	0.245495	0.245495	0.245495	0.245495	0.245495	0.245495	0.245495	0.245495	0.245495	0.734209	0.245495	0.245495	0.245495	0.245495	0.245495	0.245495	0.245495	0.245495	0.245495	0.245495	1.38506	0.245495	0.245495	0.245495
X - 11452			0.409593	0.409593	0.409593	0.409593	0.409593	0.409593	0.409593	0.409593	0.409593	0.409593	0.409593	0.409593	0.409593	0.409593	0.409593	0.409593	0.409593	0.409593	0.409593	0.409593	0.409593	0.409593	0.409593	0.409593	0.409593	0.409593	0.409593	0.409593	0.409593	0.409593	0.409593	0.409593	0.409593	0.409593	0.409593	0.409593	0.409593	0.409593	0.409593	0.409593	0.409593	0.409593	0.409593	0.409593	0.409593	0.409593	0.409593
X - 11469			1.10806	0.391479	0.391479	0.391479	1.29372	0.565391	2.76317	3.52763	2.33381	0.796701	0.391479	0.391479	0.391479	0.391479	0.391479	0.391479	0.391479	1.79622	0.391479	0.662794	0.391479	1.08512	0.391479	0.391479	0.391479	0.391479	0.391479	0.391479	0.391479	0.391479	0.391479	0.391479	1.1763	0.391479	0.391479	0.712601	0.602938	4.35822	0.391479	1.24748	1.74074	0.391479	0.391479	0.849059	1.27822	1.05589	0.903029
X - 11511			0.295504	1.04929	0.295504	1.10061	0.503012	0.746512	0.459877	1.27534	1.28642	0.295504	0.459022	0.441261	0.666139	0.586462	0.719415	0.738197	1.26978	0.956132	1.55487	1.37042	1.25144	2.37685	0.681963	1.56419	1.43511	0.6998	1.40748	0.295504	3.13528	0.589914	0.295504	0.487098	0.742742	1.48792	0.804928	0.926021	0.817812	1.45042	1.57036	0.550803	0.994409	1.16213	1.17655	1.15413	1.26515	0.295504	1.32836
X - 11521			1.68703	0.903303	0.606051	0.790717	1.74441	2.31298	1.33	0.627838	0.720477	2.40434	1	3.02946	0.985198	2.08285	0.846386	1.19997	5.51082	1.16146	0.882628	2.74962	2.23893	0.893914	4.39196	2.45883	4.46555	1.26134	1.62362	1.98175	0.210188	0.458329	0.210188	3.32746	1.45524	0.210188	1.70594	0.210188	1.00225	1.29446	0.42365	0.889456	0.850383	1.6526	7.19039	0.413047	1.68337	4.1108	5.16455
X - 11533			1.23696	1.62242	1.00537	1.68647	1.20777	1.12296	1.33414	1.82362	1.62648	1.05732	1.16489	0.687631	1.77667	0.781542	1.23695	0.936117	0.611467	1.47806	1.15068	1.31406	0.952015	1.3942	0.501802	1.04124	0.887228	1.0261	1.59802	1.33641	0.754864	1.28384	1.56263	0.652899	1.02726	0.883642	1.18521	0.669774	1.5601	1.15176	1.69804	1.33728	1.03245	0.786533	0.73204	0.628808	1.40578	0.691301	0.720557
X - 11537			1	0.419749	0.242138	0.768008	0.575151	0.242138	0.938031	0.593435	0.924923	0.895283	0.242138	0.683365	0.435907	0.242138	0.644431	0.242138	0.242138	1.82976	0.242138	0.242138	1.08136	0.682485	0.242138	0.242138	0.242138	1.34416	1	0.242138	0.242138	0.242138	0.242138	0.242138	0.459794	0.242138	0.242138	0.242138	0.242138	0.958639	0.701166	0.242138	0.242138	0.242138	0.242138	0.242138	0.398909	0.242138	0.242138
X - 11538			0.950298	0.770483	0.30958	1.78609	0.30958	1.95151	1	0.849228	0.30958	1.71347	2.40649	2.45865	1.44771	0.30958	0.30958	1.24405	0.30958	0.30958	1.12947	1.08224	0.976691	1.49747	1.32436	1	1.1126	1.13131	1.29261	0.764365	1.88601	1.54258	1.37756	0.30958	1.16388	0.30958	0.726682	0.30958	0.30958	1.65203	0.30958	0.30958	0.30958	0.381698	0.739557	1.07031	0.30958	0.705676	0.683037
X - 11542			0.557865	1.56682	0.778581	0.706557	1.17271	1.76769	1.189	1.68005	1.35639	0.736422	0.945724	1.0267	0.851629	1.17162	1.74983	0.95532	0.680295	0.894501	1.36633	0.852445	1.02277	0.401582	0.916369	0.950587	0.675948	1.09306	0.872796	0.401582	0.870479	1.01232	1.86991	0.624295	1.24264	0.831857	1.39488	0.988844	1.01758	2.10386	0.916848	1.27385	1.12697	1.52819	1.13861	0.792821	1.94962	1.12267	0.732462
X - 11550			1.33618	8.1104	2.30824	2.21008	0.970825	1.85306	2.90998	3.40658	2.17748	0.663167	0.818402	0.774576	2.69708	2.63196	1.77143	0.844615	0.367625	1.93033	0.678624	6.04206	1.20534	1.5857	0.720638	0.307642	1.11162	0.521225	1.82628	1.1221	0.953436	1.27779	2.46069	0.478837	0.719475	0.737144	0.553871	0.525247	0.805039	2.45306	1.21276	1.35141	3.96422	0.462395	0.39371	0.409271	2.12857	1.21145	0.393491
X - 11561			0.500679	0.500679	0.500679	0.500679	0.500679	0.500679	0.500679	0.500679	0.500679	0.500679	0.500679	0.500679	0.500679	0.500679	0.500679	0.500679	0.500679	0.500679	0.500679	0.500679	0.500679	0.500679	0.500679	0.500679	0.500679	0.500679	0.500679	0.500679	0.500679	0.500679	0.500679	0.500679	0.500679	0.500679	0.500679	0.500679	0.500679	0.500679	0.500679	0.500679	0.500679	0.500679	0.500679	0.500679	0.500679	0.500679	0.500679
X - 11564			0.443676	0.443676	0.443676	0.467485	0.443676	0.443676	0.443676	0.443676	0.443676	0.443676	0.443676	0.443676	0.443676	0.443676	0.443676	0.443676	0.443676	0.443676	0.443676	0.443676	0.443676	0.443676	0.443676	0.443676	0.443676	0.443676	0.443676	0.443676	0.443676	0.443676	0.443676	0.443676	0.443676	0.443676	0.443676	0.443676	0.443676	0.443676	0.443676	0.443676	0.443676	0.443676	0.443676	0.443676	0.443676	0.443676	0.443676
X - 11575			0.235357	0.153357	0.198014	0.279835	0.153357	0.153357	0.153357	0.153357	0.406522	0.153357	1.48981	0.431779	0.294685	0.910802	0.153357	0.190429	0.153357	0.240643	4.22167	0.27319	0.361528	1.92458	0.943797	1.44981	0.599839	0.601948	1.62452	1.19114	0.873017	0.153357	0.153357	0.693494	0.153357	1.19614	0.516857	0.944962	0.207406	0.476426	0.725476	0.453729	0.713891	1.01566	0.974945	0.22043	0.97136	0.274138	0.619584
X - 11578			0.24103	0.193891	0.467269	0.306006	0.193891	0.314212	0.265126	0.193891	0.335434	0.193891	1.25945	0.469505	0.264128	1.27765	0.193891	0.193891	1.50335	0.428228	3.63288	0.193891	0.379658	1.87702	0.826179	1.468	0.593256	0.707449	1.67441	1.26884	0.574361	0.193891	0.193891	0.433239	0.193891	0.945255	0.193891	0.855852	0.193891	0.530109	0.967806	0.193891	0.603166	1.01149	0.92296	0.537195	0.718415	0.209253	0.616416
X - 11583			1.01396	0.999263	0.928945	0.711027	0.853123	0.596053	0.790762	0.558664	1.04727	0.78091	0.365947	1.16197	0.718188	1.18536	7.02768	0.819013	2.31499	0.859533	0.365947	0.978447	1.72289	1.40425	4.74306	1.62563	14.1722	3.17564	0.58957	0.871555	1.23535	0.933008	0.699061	2.20184	0.757266	91.6861	0.87472	205.698	2.11246	2.25487	0.583303	0.365947	2.56963	3.77309	137.366	1.1657	0.89746	0.394491	102.61
X - 11585			0.578436	0.392023	2.34929	1	0.253527	0.983324	1.27928	0.104726	0.851996	0.104726	1.08474	0.764974	0.409203	1.77532	0.660531	0.386295	1.13748	1.19777	2.62566	0.529912	0.984279	2.76585	1.13005	1.65746	1.27643	0.820695	2.38478	1.46826	1.07505	0.104726	0.104726	0.825478	0.104726	0.915241	0.104726	0.772629	0.176393	0.539134	1.13555	0.237994	0.650031	1.59103	0.914473	0.523724	2.0195	0.522444	1.038
X - 11611			1.85859	0.77306	0.305382	1.33997	0.988353	3.04795	1.02051	0.763006	1.04533	0.436856	0.838957	1.54383	0.896551	2.00194	0.254145	2.46523	1	0.922244	1.6495	1.3596	1.70492	1.96698	1.36833	2.58886	2.46631	0.894644	1.78156	1.31803	1.38707	0.144365	0.567181	0.936475	0.73747	0.59132	0.569762	1.07663	0.228894	1.84804	1.17791	0.338708	0.351265	1.2817	0.740953	1.61874	0.744771	1	1.99388
X - 11612			0.266909	0.266909	0.266909	0.266909	0.591484	1.33536	0.414141	0.266909	0.266909	0.266909	0.445314	0.266909	0.266909	0.266909	0.266909	1.48626	1.74128	0.266909	1.08645	0.266909	0.266909	0.266909	0.849414	0.929646	0.655284	0.266909	1.17674	0.266909	1.71593	0.266909	0.266909	0.266909	0.266909	1.61478	0.266909	2.57476	0.266909	0.452003	1	0.266909	0.266909	3.13767	2.16289	0.266909	0.846086	0.266909	1.20444
X - 11613			0.12999	0.12999	0.12999	0.12999	0.12999	0.207832	0.12999	0.12999	0.980912	0.12999	0.294481	0.546335	0.12999	0.12999	0.12999	0.602704	0.12999	0.12999	0.279057	0.208032	0.286825	0.47684	0.167615	0.12999	0.12999	0.294511	0.427513	0.195986	0.12999	0.12999	0.12999	0.12999	0.12999	0.12999	0.12999	0.12999	0.12999	0.401568	0.244317	0.12999	0.12999	0.12999	0.12999	0.12999	0.232849	0.12999	0.189578
X - 11615			0.352976	0.352976	0.352976	1.29296	0.352976	0.352976	1	0.352976	0.352976	1	0.352976	0.352976	1.46109	0.352976	0.45159	0.352976	0.352976	0.352976	0.352976	0.355394	0.352976	0.352976	0.352976	0.352976	0.352976	0.352976	0.884638	0.352976	0.352976	1	1	0.352976	0.352976	0.352976	0.352976	0.352976	0.352976	0.352976	0.352976	1.60104	0.57016	0.352976	0.352976	0.352976	0.352976	0.352976	0.352976
X - 11639			0.915005	0.915005	0.915005	0.915005	0.915005	0.915005	0.915005	0.915005	0.915005	0.915005	0.915005	0.915005	0.915005	0.915005	0.915005	0.915005	0.915005	0.915005	0.915005	0.915005	0.915005	0.915005	0.915005	0.915005	0.915005	0.915005	0.915005	0.915005	0.915005	0.915005	0.915005	0.915005	0.915005	0.915005	0.915005	0.915005	0.915005	0.915005	0.915005	0.915005	0.915005	0.915005	0.915005	0.915005	0.915005	0.915005	0.915005
X - 11641			1.9063	1.00202	0.600755	1.55463	0.398759	0.944101	1.64272	0.563525	0.68677	1.03339	0.64392	1.30158	0.665911	0.629641	0.335569	0.603686	1.40244	0.642786	0.800372	1.51529	1.6612	1.34565	0.522362	1.55042	1.15408	0.379804	0.967117	3.15237	2.61282	0.535355	0.737527	0.583296	2.00728	2.49915	2.19543	1.64925	0.16757	1.21027	2.27293	0.483518	0.797849	2.93388	1.17665	0.967513	1.474	2.22548	1.48441
X - 11662			1.8986	0.209954	0.209954	0.209954	0.209954	0.983158	0.209954	0.209954	2.36504	0.209954	1.37468	0.854587	0.209954	1	1.3136	0.699027	0.209954	0.209954	0.972938	0.209954	2.76096	0.209954	0.897225	1.73996	0.209954	1.53953	0.209954	2.89933	0.209954	0.209954	0.209954	2.04647	0.209954	0.209954	0.406873	0.209954	0.209954	0.756483	0.953341	0.209954	0.209954	1.404	1.26877	0.209954	0.439501	0.209954	2.24152
X - 11668			0.183112	0.183112	0.183112	0.48883	0.183112	0.183112	0.670479	0.183112	0.728973	0.183112	0.735054	0.183112	0.183112	0.183112	0.183112	0.183112	0.183112	0.183112	0.183112	0.183112	0.183112	1.23052	0.921188	0.183112	1.41217	0.183112	0.183112	0.717549	0.183112	0.183112	0.183112	0.183112	0.564688	0.183112	0.183112	0.183112	0.183112	0.476948	0.801445	0.183112	0.183112	1.5347	0.183112	1.28563	0.183112	0.183112	0.740207
X - 11684			0.880923	0.758899	0.925724	0.733594	0.241522	1.54052	3.00808	1	1.19521	0.241522	1.27068	0.794962	1.11277	1.0011	1.46957	1.11854	0.241522	0.850826	1.61869	1.6079	1.28104	2.40487	0.789546	0.50881	0.399957	0.933752	1.55562	2.49275	0.637835	0.453825	0.887232	0.241522	0.356023	1.55459	0.241522	0.241522	0.310988	0.905711	1.02737	1.12307	0.972702	0.594815	0.379451	0.241522	1.53176	0.667468	0.241522
X - 11687			0.991727	0.099806	1.25738	0.270099	0.435876	1.03528	0.551011	0.538284	1.99093	0.224827	0.845791	1.08106	0.429416	0.761824	0.307417	0.232339	0.529673	1.16227	0.87792	0.455518	0.935185	4.31334	3.35482	8.26091	0.537581	0.66523	0.371915	7.91556	1.2844	0.08465	0.160894	2.93601	0.628077	0.375462	0.375663	0.603892	0.376962	0.548852	0.754041	0.137078	0.207669	3.93352	1.98412	1.33014	0.461256	0.899724	4.35911
X - 11799			0.20505	0.20505	0.794292	0.865231	0.717606	0.20505	1	0.20505	1.13758	1.02559	0.20505	0.717124	0.20505	0.20505	0.950735	1.83489	9.49311	0.20505	0.20505	0.806715	0.916628	1.66907	0.20505	0.20505	0.609622	0.85209	0.20505	0.20505	0.20505	0.20505	1.84002	0.20505	1.25246	1.56953	0.918664	1	0.681629	1	1	0.20505	1.20665	0.20505	0.20505	2.92286	0.20505	0.20505	0.20505
X - 11814			0.238196	0.238196	0.238196	0.238196	0.238196	0.586054	0.238196	0.812288	0.238196	1.02047	0.528505	0.238196	0.238196	1.15396	0.238196	0.238196	0.238196	0.238196	0.238196	0.238196	0.55971	1.11938	0.238196	0.238196	0.238196	6.95427	0.238196	0.238196	0.805266	0.238196	0.238196	0.238196	0.595619	0.238196	0.598014	0.238196	0.238196	0.238196	0.238196	0.238196	0.238196	0.238196	0.902696	0.238196	0.903654	0.238196	0.238196
X - 11827			0.212033	0.212033	0.212033	0.5059	0.212033	0.212033	0.212033	0.212033	0.212033	0.212033	0.212033	0.212033	0.212033	0.212033	0.212033	0.212033	0.212033	0.212033	0.212033	0.212033	0.212033	0.212033	0.212033	0.212033	0.212033	0.212033	0.212033	0.4891	0.278031	0.212033	0.212033	0.212033	0.212033	0.212033	0.212033	0.212033	0.212033	0.212033	0.212033	0.212033	0.212033	0.212033	0.212033	0.212033	0.212033	0.212033	0.212033
X - 11837			0.168377	0.63082	0.168377	1	0.168377	0.168377	0.168377	0.168377	0.168377	0.168377	0.168377	0.168377	0.168377	0.168377	0.168377	0.168377	0.168377	0.168377	0.168377	0.168377	0.168377	0.168377	0.580786	0.168377	0.168377	0.168377	0.168377	0.168377	0.168377	0.168377	0.168377	0.168377	0.168377	0.168377	0.168377	0.168377	0.168377	0.168377	0.168377	0.168377	0.168377	0.168377	0.498252	0.168377	0.168377	0.168377	0.39835
X - 11861			0.666407	1.21988	0.688942	0.364394	1.01672	0.364394	1	1.51105	0.364394	0.925198	1.03212	0.364394	0.911046	0.364394	0.364394	0.364394	0.724562	0.364394	0.364394	1.28705	0.364394	0.364394	0.364394	1.31908	0.364394	0.777841	0.364394	1	0.977015	1.33515	0.364394	0.543694	0.364394	0.364394	0.963989	0.364394	0.364394	0.906555	1.37434	0.364394	0.820523	0.364394	0.76371	0.364394	1.11167	0.364394	0.909545
X - 11875			1.31793	1.12881	0.892174	1.36566	0.770227	1.58273	6.40075	1.07031	1.02236	1.26941	0.685846	2.35532	1.1182	0.827667	0.479861	0.840592	0.740683	1.14018	0.718749	1.44382	1.2586	1.00614	0.468957	1.32179	1.42525	0.565932	1.21141	2.98144	0.953918	1.01896	1.56588	0.892082	1.92718	1.05133	0.851081	0.626353	0.813332	1.22464	1.64696	0.651671	0.52578	2.79115	0.701238	0.435612	0.946918	1.84607	0.885331
X - 11880			0.875069	2.53661	0.350025	5.13847	0.96594	0.639305	1.58011	2.49436	0.742983	4.36452	1.10328	1.55905	4.21711	1.36031	1.98455	1.99849	0.225787	1.09589	0.614914	1.30358	0.987545	0.434785	0.504226	2.44786	3.48812	2.2086	2.34398	0.379842	0.609613	1.16639	2.19984	0.900586	1.28601	0.657868	2.1485	0.660164	3.7877	1.22416	1.02275	2.6722	1.3225	0.832132	0.613211	2.66594	0.225787	1.76923	1.62234
X - 11945			0.256106	0.256106	0.256106	0.623138	0.256106	0.256106	0.256106	0.256106	0.256106	0.735205	0.256106	0.256106	0.256106	0.256106	0.256106	0.256106	0.256106	0.256106	0.256106	0.256106	0.595898	0.256106	0.658069	1.00986	0.256106	0.256106	0.256106	0.256106	0.748912	0.256106	0.256106	0.256106	0.256106	0.256106	0.256106	1.37165	0.256106	0.256106	0.256106	0.256106	0.256106	0.256106	0.256106	0.256106	0.256106	0.256106	0.256106
X - 12014			0.337947	0.337947	0.337947	0.337947	0.337947	0.337947	0.337947	0.337947	0.337947	0.337947	0.764663	0.337947	0.337947	0.337947	0.337947	0.337947	0.337947	0.337947	0.337947	0.337947	0.67138	0.337947	0.506545	0.337947	0.337947	0.337947	0.337947	1.46432	0.337947	0.337947	0.337947	0.337947	0.337947	0.629045	0.337947	0.552965	0.337947	0.337947	0.337947	0.337947	0.337947	1.08089	0.337947	0.337947	0.337947	0.337947	1.4524
X - 12051			0.95431	1.39779	0.867215	1.1466	1.71309	0.938694	1.02485	1.08339	1.22098	0.622163	1.03129	1.04211	2.09711	1.40945	2.00014	0.268187	0.767472	1.68721	0.250775	0.743833	0.957889	0.413855	0.848912	0.234242	0.32695	0.910896	0.522974	0.176067	1.17932	1.41647	1.72389	0.190637	1.06131	2.06362	1.14266	1.07558	1.27341	1.58916	0.862468	2.62394	1.0427	0.850519	0.516033	1.32968	2.50923	0.6576	0.62993
X - 12056			0.073239	0.073239	0.073239	0.073239	0.073239	0.073239	0.073239	1.94888	1.09405	1.41564	0.825965	0.073239	0.588901	0.821902	0.073239	1.1183	0.073239	0.181246	0.073239	0.073239	0.073239	3.87227	0.073239	0.073239	2.36108	0.073239	0.073239	0.073239	0.073239	1	0.073239	1.22759	0.073239	0.254345	0.551519	0.073239	0.073239	1.50434	0.073239	0.073239	0.073239	0.073239	0.073239	0.887473	1.19057	0.073239	0.073239
X - 12093			0.170468	0.227966	0.59992	2.30873	0.950493	6.67205	1.00324	1.39919	1.63786	0.042203	0.042203	0.705136	0.042203	2.18284	0.042203	0.191206	0.042203	0.863535	0.476441	0.746971	4.04292	0.706878	2.16201	0.992363	0.042203	0.988001	1.13081	8.41296	0.042203	0.099392	0.042203	1.50868	2.27049	0.042203	1.41008	0.694812	0.042203	0.820925	0.363252	0.644018	0.495416	24.5363	0.947412	0.510919	0.517402	0.366653	13.068
X - 12100			1.90324	0.332603	0.276977	0.780292	0.929961	0.863432	1.01578	0.637957	1.64415	1.31003	2.00497	0.909991	0.32848	2.32562	0.27246	0.883848	1.28368	0.747871	2.43271	1.09466	1.97021	1.52614	1.23127	1.80725	1.10673	1.77961	1	2.98287	0.95247	0.674767	0.801764	2.02353	1.10758	1.83101	1.32049	1.8114	0.965097	0.537489	1.3927	1.59331	0.804338	1.46788	1.37151	1.04204	1.8704	1.32503	2.10592
X - 12104			0.316368	0.621535	0.316368	0.718128	1.95068	0.701688	1.05476	0.750488	1.11334	0.806083	1.82977	0.485032	0.749113	2.48166	0.613361	0.718488	0.316368	0.316368	0.957397	1.20187	0.903052	1.65558	0.862351	0.643546	0.702023	0.316368	1.00956	0.811323	1.3885	1.61139	0.79189	0.663438	0.486104	0.702632	0.316368	0.916741	1.10255	2.37569	0.590947	0.610439	0.589828	0.316368	0.316368	0.80588	1.11444	0.316368	1.25065
X - 12127			0.344422	0.344422	0.344422	0.898828	0.344422	0.727778	1.02241	0.58567	1.01763	0.344422	0.344422	0.963204	0.597357	1	0.428089	0.344422	0.344422	0.344422	2.34832	0.344422	1.13518	0.344422	0.344422	0.344422	0.759358	0.596242	1.06227	0.344422	1.32102	0.344422	0.344422	0.344422	0.508937	1.87129	0.774553	0.344422	1.03228	0.874775	1.25904	0.999664	0.344422	0.344422	0.344422	0.344422	0.934493	0.344422	0.344422
X - 12179			0.244556	0.244556	0.244556	0.244556	0.244556	0.244556	0.244556	0.244556	0.244556	0.244556	0.244556	0.244556	0.244556	0.244556	0.244556	0.244556	0.244556	0.244556	0.244556	0.244556	0.244556	0.244556	0.244556	0.244556	0.244556	0.244556	0.244556	0.244556	0.244556	0.244556	0.244556	0.244556	0.244556	0.244556	0.244556	0.244556	0.244556	0.244556	0.244556	0.244556	0.244556	0.244556	0.244556	0.244556	0.244556	0.244556	0.244556
X - 12199			0.314249	0.996101	0.314249	0.314249	0.314249	0.314249	0.314249	0.314249	0.314249	0.314249	0.314249	0.662301	0.860403	0.314249	0.314249	0.314249	7.04237	0.314249	0.314249	0.314249	0.314249	0.314249	0.991991	0.314249	0.314249	0.314249	0.314249	0.314249	0.801997	0.314249	0.314249	0.756488	0.314249	0.314249	0.314249	2.06715	0.314249	1.04545	0.314249	0.314249	0.314249	0.314249	0.868969	1.35808	0.314249	0.314249	0.314249
X - 12244			0.117093	0.117093	0.117093	0.546459	0.117093	0.117093	0.117093	0.161841	0.117093	0.117093	0.117093	0.117093	0.117093	0.117093	0.117093	0.117093	0.117093	0.117093	0.117093	0.117093	0.117093	0.125306	0.117093	0.117093	0.117093	0.117093	0.117093	0.117093	0.117093	0.117093	0.2291	0.117093	0.117093	0.148751	0.117093	0.117093	0.388317	0.117093	0.387055	0.431434	0.171811	0.117093	0.117093	0.117093	0.117093	0.117093	0.117093
X - 12283			0.40392	0.40392	0.40392	0.40392	0.40392	0.40392	0.40392	0.40392	0.40392	0.40392	0.40392	0.40392	0.40392	0.40392	0.40392	0.40392	0.40392	0.40392	0.40392	0.40392	0.40392	0.40392	0.40392	0.40392	0.40392	0.40392	0.40392	0.40392	0.40392	0.40392	0.40392	0.40392	0.40392	0.40392	0.40392	0.40392	0.40392	0.40392	0.40392	0.40392	0.40392	0.40392	0.40392	0.40392	0.40392	0.40392	0.40392
X - 12362			0.184559	0.184559	0.184559	0.184559	0.184559	0.184559	0.184559	0.184559	0.184559	0.184559	0.184559	0.184559	0.184559	0.184559	0.184559	0.184559	0.184559	0.184559	0.184559	0.184559	0.184559	0.184559	0.184559	0.184559	0.184559	0.184559	0.184559	0.184559	0.184559	0.184559	0.184559	0.184559	0.184559	0.184559	0.184559	0.184559	0.184559	0.184559	0.184559	0.184559	0.184559	0.184559	1.69516	0.184559	0.184559	0.184559	0.184559
X - 12443			0.559953	2.62063	0.058023	0.058023	0.058023	3.17039	0.058023	2.90804	0.058023	2.5163	0.058023	0.259298	2.06006	0.058023	0.058023	4.00353	0.264333	2.32962	0.50926	0.058023	1.00721	1.03768	0.106508	0.873147	1	2.84861	0.760506	0.058023	0.501906	0.058023	0.058023	0.058023	2.3574	0.058023	1.5831	0.472168	2.16781	0.058023	0.485568	0.058023	5.81209	0.769863	0.058023	1.5036	2.90881	3.64623	0.446202
X - 12450			0.153507	0.211513	0.550499	0.153507	0.972886	0.908889	1.2273	0.896798	1.42052	0.276502	2.50133	0.770499	0.976457	0.342633	0.758961	0.397861	0.838675	0.371162	0.153507	1.20449	0.271031	2.25045	1.0901	2.83076	1.2182	2.31478	1.76463	1.37116	1.59229	0.928136	0.407201	2.00371	0.448767	0.990604	1.09804	1.23476	0.153507	1.13478	1.01734	0.153507	0.187045	1.3338	0.592543	0.70199	0.454867	0.308809	0.950399
X - 12462			1.07115	1.62376	0.609463	0.76804	0.359281	3.35069	1.07709	1.51358	0.730962	1.07672	0.778534	1.33205	0.503989	0.885869	0.575689	1.11484	1.72137	0.85407	2.61939	0.91752	1.07673	1.64786	2.64874	1.08242	0.558194	1.47332	0.572256	1.72467	1.23459	0.372157	0.555545	1.39418	0.864832	0.721716	0.960811	0.485697	1.00443	0.84485	0.734058	0.704636	0.451201	0.903579	0.61452	0.635407	0.977667	0.867315	1.64576
X - 12465			2.09055	0.177034	0.304904	0.661656	1.32683	1.49553	1.48211	0.356456	1.55054	0.912163	2.53347	1.17291	2.5609	1.57608	0.259308	0.817367	9.74626	1.02474	4.30201	1.18357	0.947792	1.93496	1.96183	8.50693	2.3796	1.44864	0.929473	2.75337	1.33679	0.185243	0.262828	2.42073	0.763593	1.54601	1.8447	3.61043	0.297549	2.229	1.40122	0.459238	0.463062	1.47796	15.7996	2.66143	4.86421	1.00383	1.14854
X - 12543			0.184676	0.184676	0.184676	0.184676	0.184676	0.184676	0.184676	0.184676	0.184676	0.184676	0.184676	0.184676	0.184676	0.184676	0.184676	0.184676	0.184676	0.184676	0.184676	0.184676	0.184676	0.184676	0.184676	0.184676	0.184676	0.184676	0.184676	0.184676	0.184676	0.184676	0.184676	0.184676	0.184676	0.184676	0.184676	0.184676	0.184676	0.184676	0.184676	0.184676	0.184676	0.184676	0.184676	0.184676	0.184676	0.184676	0.184676
X - 12627			0.15931	1.07697	1.11759	0.706879	0.15931	1.80946	6.61618	3.83974	16.8167	0.15931	2.35019	1.37836	2.4707	1.08326	0.869665	0.667337	6.14384	0.15931	0.15931	2.54542	0.777886	4.12529	0.7033	2.58546	5.14809	2.31584	2.31561	5.9414	13.0459	1.26884	2.36424	3.41881	1.65245	3.38889	1.23569	5.95914	0.948006	1.99234	2.39325	1.57468	0.669535	1.75659	1.43713	1.99985	3.74079	2.01817	2.28972
X - 12636			0.397721	0.397721	0.397721	0.397721	0.397721	0.397721	0.397721	0.397721	0.397721	0.840479	0.397721	0.397721	0.397721	0.397721	0.397721	0.397721	0.397721	0.397721	0.397721	0.397721	0.397721	0.397721	0.397721	0.397721	0.397721	0.397721	0.397721	0.397721	0.397721	0.397721	0.397721	0.397721	0.397721	0.397721	0.397721	0.397721	0.397721	0.397721	0.397721	0.397721	0.397721	0.397721	0.397721	0.397721	0.397721	0.397721	0.524505
X - 12660			1.01062	1.28899	1.55925	1.17775	1.19228	1.19577	1.10539	1.04366	1.67797	0.83697	1.2806	1.06448	1.98494	1.31353	1.94768	0.328089	0.880359	1.55925	0.269718	0.933986	1.10072	0.724434	0.697104	0.270597	0.409967	0.826677	0.938239	0.414106	1.03772	1.36762	1.49787	0.243891	1.09058	1.88381	0.95634	1.25187	1.05376	1.31036	0.818034	1.82158	0.611749	0.899453	0.532982	1.30307	2.94802	0.710227	0.841256
X - 12687			1	1	1	1	1	1	1	1	1	1	1	1	1	1	1	1	1	1	1	1	1	1	1	1	1	1	1	1	1	1	1	1	1	1	1	1	1	1	1	1	1	1	1	1	1	1	1
X - 12715			0.392545	0.392545	0.392545	0.392545	0.392545	0.392545	0.392545	0.392545	0.392545	0.392545	0.392545	0.392545	0.392545	0.392545	0.392545	0.392545	0.392545	0.392545	0.392545	0.735363	0.392545	0.392545	0.392545	0.392545	0.392545	0.392545	0.392545	0.392545	0.392545	0.392545	0.392545	0.392545	0.392545	0.392545	0.392545	0.392545	0.392545	0.392545	0.392545	0.392545	0.392545	0.392545	0.392545	0.392545	0.392545	0.392545	0.392545
X - 12718			0.452255	0.452255	0.452255	1	0.452255	0.452255	0.452255	0.452255	0.452255	0.452255	0.452255	0.452255	0.452255	0.452255	0.452255	0.452255	0.452255	0.452255	0.452255	0.452255	0.452255	0.452255	0.452255	0.452255	0.452255	0.452255	0.452255	0.452255	0.452255	0.452255	0.452255	0.452255	0.452255	0.452255	0.452255	0.452255	0.452255	0.452255	0.452255	0.452255	0.452255	0.452255	0.452255	0.452255	0.452255	0.452255	0.452255
X - 12739			0.355752	0.355752	0.355752	0.52366	0.355752	0.355752	0.355752	0.355752	0.355752	0.355752	0.355752	0.355752	0.355752	0.355752	0.355752	0.355752	0.355752	0.355752	0.355752	0.355752	0.355752	0.355752	0.355752	0.355752	0.355752	0.355752	0.355752	0.355752	0.355752	0.355752	0.355752	0.355752	0.355752	0.355752	0.355752	0.355752	0.355752	0.355752	0.355752	0.355752	0.355752	0.355752	0.355752	0.355752	0.355752	0.355752	0.355752
X - 12741			0.022336	0.022336	0.022336	0.022336	0.022336	0.022336	0.022336	0.022336	0.022336	0.022336	0.022336	0.022336	0.022336	0.022336	0.022336	0.022336	0.022336	0.022336	0.022336	0.022336	0.022336	0.022336	0.022336	0.022336	0.022336	0.022336	0.022336	0.022336	0.022336	0.022336	0.022336	0.022336	0.022336	0.022336	0.022336	0.022336	0.022336	0.022336	0.022336	0.022336	0.022336	0.022336	0.022336	0.022336	0.022336	0.022336	0.022336
X - 12742			0.120337	0.120337	0.120337	0.610983	0.640298	0.91965	0.329433	0.120337	0.120337	0.120337	0.120337	0.120337	0.120337	0.120337	0.120337	0.120337	0.120337	0.120337	0.120337	0.316186	0.346603	0.149508	0.815675	0.120337	0.120337	0.558699	0.120337	0.120337	0.120337	0.120337	0.120337	0.605917	0.120337	0.120337	0.120337	0.120337	0.120337	0.160678	0.46853	0.120337	0.120337	0.120337	0.120337	0.120337	0.120337	0.120337	0.146005
X - 12746			0.422424	0.422424	0.422424	0.422424	0.422424	0.422424	0.422424	0.422424	0.422424	0.422424	0.422424	0.422424	0.422424	0.422424	0.422424	0.422424	0.422424	0.422424	0.422424	0.422424	0.422424	0.422424	0.422424	0.422424	0.422424	0.422424	0.422424	0.422424	0.422424	0.422424	0.422424	0.422424	0.422424	0.422424	0.422424	0.422424	0.422424	0.422424	0.422424	0.422424	0.422424	0.422424	0.422424	0.422424	0.422424	0.422424	0.422424
X - 12748			1.95392	0.157182	0.708973	0.496576	0.14786	1.63497	2.20828	1.16168	2.03972	2.07616	1.05164	1.94543	1.41847	0.72299	1.37293	3.37111	0.887756	1.19768	5.47681	0.770184	2.55028	2.714	1.96185	1.15671	2.73577	3.46071	2.09853	3.38157	3.12755	0.185839	0.993873	1.91423	1.06955	1.21917	1.70863	3.25733	0.502368	0.65744	2.44486	1.19245	1.39634	3.03949	1.48039	3.75737	3.61931	1.8532	2.62466
X - 12760			0.097543	0.097543	0.097543	0.720245	0.097543	0.097543	0.472871	0.097543	1	0.486159	1.07669	0.097543	1.05258	0.097543	0.097543	0.097543	0.406336	0.097543	0.781758	0.097543	0.097543	0.097543	0.097543	0.097543	0.097543	0.097543	0.097543	0.097543	0.097543	0.097543	0.097543	0.724527	0.097543	0.234577	0.623886	0.544158	0.097543	0.097543	0.097543	0.097543	0.097543	0.097543	0.475181	1.5043	0.097543	0.097543	0.097543
X - 12776			0.837746	0.252112	0.355841	1.91252	0.65186	1.6543	1.22778	1.48419	0.988193	1.20186	0.742239	1.43679	2.19075	0.779612	1.65051	1.14817	0.252112	1.5676	0.26394	0.421858	1.27591	0.554788	0.526224	0.528326	0.894366	0.990546	0.777053	0.852575	0.418574	1.04707	1.43721	0.442601	1.49297	0.601125	1.27731	0.334288	1	1.54978	0.833006	1.27944	1.15419	0.55956	0.582871	1.03716	0.610235	1.09057	0.352929
X - 12780			1.00259	0.129209	0.129209	0.129209	0.129209	0.129209	0.514301	0.129209	0.129209	0.129209	3.24443	1.15575	0.129209	0.640444	0.129209	1.06896	3.87647	0.129209	8.18362	1.02771	0.786893	0.854642	1.31055	3.93043	1.00189	0.282335	1.56879	2.28314	1.66001	0.129209	0.129209	1.20766	0.129209	1.98653	0.573829	1.6519	0.129209	0.6947	0.458885	0.129209	0.52468	1.81899	1.13682	1.16791	0.833589	0.129209	1.41405
X - 12791			1.47777	0.99817	2.04666	1.01864	0.196135	1.44905	1.89529	1.07347	1.91025	0.196135	1.53547	1.1781	1	0.934026	0.61358	0.196135	0.196135	1.26313	1.60643	1.00435	1.00374	1.77127	1.04214	1.03264	1.03378	0.5801	1.4648	1.04227	1.14244	0.196135	0.63482	0.196135	0.196135	0.795535	0.196135	0.196135	0.470932	0.827471	1.36782	0.55819	0.743432	0.995383	0.443957	0.196135	14.2348	0.634494	0.196135
X - 12792			1.02916	0.646342	0.41442	0.764091	1.91266	1.27506	2.90923	0.971873	1.93604	1.16153	1.04305	2.12154	1.34123	2.43591	0.866563	1.37542	0.428145	0.595892	1.52958	2.3311	0.652548	4.04084	1.00765	0.514894	0.552835	1.23055	1.40445	1.304	1.05951	0.82994	0.867071	0.810524	1.19045	0.360589	1.47848	0.088861	2.46875	2.48523	1.01269	1.46805	0.436657	1.05362	0.427152	0.681527	4.43782	2.22593	0.433739
X - 12800			0.564551	0.163726	0.30783	0.191087	1.03495	1.15652	0.577132	0.400728	1.8781	0.48073	1.38413	2.68962	2.64974	0.714929	0.899386	0.892249	1.46	1.02704	0.491089	0.163726	0.452621	1.35442	0.577842	0.868125	1.07033	1.96955	1.5382	0.535742	1.5948	0.262593	0.231791	0.826671	1.27064	0.61631	1.12541	5.7644	0.66017	0.659895	1.0914	0.239701	1.16439	1.61717	0.704062	1.42882	0.381454	0.495108	0.422421
X - 12803			0.530273	1	0.686836	0.431229	0.950759	1.06298	2.13295	0.850992	1.59471	0.695652	0.996491	1.63553	1.3675	0.844947	1.23802	0.827716	0.929535	1.52639	1.48669	0.992532	1.25206	2.23516	1.0028	0.682268	0.7075	0.783114	1.51848	2.11523	1.2066	1.21441	1.20501	0.224721	0.480963	1.35549	0.224721	0.247218	0.224721	1.3195	0.767936	0.742649	0.979162	0.809099	1.09842	0.648049	1.41887	0.656015	0.42983
X - 12805			0.696916	1.01834	1.61569	1.0444	0.375862	0.634782	1.27592	2.83396	1.4921	0.338426	1.53004	0.338426	1.3296	0.639058	0.815229	0.338426	1	0.911884	0.623786	0.779525	1.69528	1.46242	0.338426	0.724299	0.878327	0.987572	1.11574	0.338426	0.82683	0.706855	0.985675	0.338426	0.338426	0.813431	0.834899	0.893925	0.338426	1.10049	0.338426	0.795297	1	1.32426	0.338426	0.882322	1	0.520096	0.338426
X - 12816			0.286643	0.286643	0.286643	0.376431	0.286643	0.286643	0.286643	0.286643	0.286643	0.286643	0.381096	0.286643	0.286643	0.286643	0.286643	0.286643	0.286643	0.286643	0.286643	0.286643	0.286643	0.286643	0.286643	0.286643	0.286643	0.286643	0.286643	0.286643	0.286643	0.286643	0.286643	0.286643	0.286643	0.286643	0.286643	1.33404	0.286643	0.286643	0.286643	0.286643	0.286643	0.286643	0.286643	0.286643	0.286643	0.286643	0.286643
X - 12824			0.223969	0.223969	0.223969	0.760516	0.223969	0.223969	0.223969	0.223969	0.518412	0.223969	0.223969	0.223969	0.223969	0.223969	0.223969	0.63856	0.223969	0.223969	0.223969	0.223969	0.223969	0.223969	0.38356	0.223969	0.223969	0.223969	0.442392	0.223969	0.223969	0.223969	0.223969	0.223969	0.223969	0.223969	0.223969	0.223969	0.520181	0.223969	0.223969	0.223969	0.223969	0.223969	0.223969	0.223969	0.223969	0.223969	0.223969
X - 12844			0.414369	0.414369	0.414369	0.509591	0.414369	0.414369	0.414369	0.414369	0.414369	0.414369	0.414369	0.414369	0.414369	0.414369	0.414369	0.414369	0.414369	0.414369	0.414369	0.414369	0.414369	0.414369	0.414369	0.414369	0.414369	0.414369	0.414369	0.414369	0.414369	0.414369	0.414369	0.414369	0.689139	0.414369	0.414369	0.414369	0.414369	0.414369	0.414369	0.414369	0.414369	0.414369	0.414369	1	0.414369	0.414369	0.414369
X - 12846			0.543806	0.543806	0.543806	0.543806	0.543806	0.543806	0.543806	0.543806	0.543806	0.543806	0.543806	0.543806	0.543806	0.543806	0.543806	0.543806	0.543806	0.543806	0.543806	0.543806	0.543806	0.543806	0.543806	0.543806	0.543806	0.543806	0.543806	0.543806	0.543806	0.543806	0.543806	0.543806	0.543806	0.543806	0.543806	0.543806	0.543806	0.543806	0.543806	0.543806	0.543806	0.543806	0.543806	0.543806	0.543806	0.543806	0.543806
X - 12849			0.200186	0.200186	0.200186	0.200186	0.200186	0.200186	0.200186	0.200186	0.200186	0.200186	0.200186	0.200186	0.200186	0.200186	0.200186	0.200186	0.200186	0.200186	0.200186	0.200186	0.200186	0.200186	0.200186	0.200186	0.200186	0.200186	0.200186	0.200186	0.200186	0.200186	0.200186	0.200186	0.200186	0.200186	0.200186	0.200186	0.200186	0.200186	0.200186	0.200186	0.200186	0.200186	0.200186	0.200186	1	0.200186	0.200186
X - 12851			0.306069	0.306069	0.306069	0.306069	0.306069	0.306069	0.306069	0.306069	0.306069	0.306069	0.306069	0.306069	0.306069	0.306069	0.306069	0.306069	0.306069	0.306069	0.306069	0.306069	0.306069	0.306069	0.306069	0.306069	0.306069	0.306069	0.306069	0.306069	0.306069	0.306069	0.306069	0.306069	0.306069	0.306069	0.306069	0.306069	0.306069	0.306069	0.306069	0.306069	0.306069	0.306069	0.306069	0.306069	0.306069	0.306069	0.306069
X - 12854			0.840112	0.701444	0.395369	1.01149	1.35632	1	1.1746	1.20134	1.38718	1.30865	2.513	2.7428	4.20538	1.81288	0.989351	2.62639	3.3686	1.54527	1.38666	1.25532	1.70058	1.76022	1.50105	1.1793	1.24235	1.23289	1.24592	1.70995	0.890122	0.676823	0.943144	0.882016	1.21101	1.76745	1.40801	1.56089	1.07968	1.80213	1.60623	1.33162	0.790383	2.01728	1.2686	0.957533	1.40425	1.91244	1.1927
X - 12855			3.27185	0.08131	0.383213	0.824188	0.388099	1.2423	3.48203	0.282483	3.72101	0.56816	1.89843	0.514068	5.069	1.8662	0.166445	0.567817	1.21717	2.66616	2.88446	0.281168	2.17887	3.76021	4.09852	12.872	2.51409	2.31169	1.48188	8.13391	1.05054	0.10651	0.359555	6.33026	0.936731	0.578839	1.95174	3.96464	0.292375	1.89324	1.40674	0.583101	0.261843	1.47416	3.60991	5.83523	6.30319	2.30554	1.84429
X - 12860			3.02567	0.230398	0.162577	0.162577	0.38279	0.988217	1.34	0.189653	1.17335	0.313948	0.891593	0.650317	1.25596	1.42771	0.162577	0.617894	2.55275	1.56648	1.5116	1.38068	1.6169	1.10818	2.13883	12.6589	1.9466	0.568493	1.43002	1.85759	0.449732	0.162577	0.162577	2.75027	0.748016	0.54479	1.35637	1.0592	0.509568	0.957811	0.566703	0.162577	0.218236	1.06501	10.3024	2.49335	1.67765	1.10899	1.70128
X - 12869			0.357108	0.357108	0.357108	0.357108	0.357108	0.357108	0.357108	0.357108	0.357108	0.357108	0.357108	0.446678	0.357108	0.357108	0.357108	0.357108	1.53388	0.357108	3.86764	0.357108	0.589585	0.357108	1.10599	0.424673	0.357108	0.443317	0.357108	0.357108	0.988606	0.357108	0.357108	1.36912	0.357108	1.11372	0.357108	1.42228	0.357108	0.357108	0.357108	0.357108	0.357108	1	1.11263	0.357108	0.357108	0.357108	3.05864
X - 12992			0.34106	0.34106	1.1501	0.34106	0.869072	1.40779	0.737458	0.56448	1.13508	0.888955	0.34106	0.34106	1.14017	0.34106	22.6998	0.960841	0.34106	0.34106	0.34106	0.988502	0.34106	0.34106	0.924028	0.642189	3.76038	0.798579	1.00476	1.01504	0.91727	2.73572	0.561386	0.748126	0.34106	11.5747	0.34106	26.2992	18.4551	1	0.948633	1.26742	23.6502	0.867238	25.1928	0.34106	0.34106	0.34106	21.7646
X - 13005			0.679739	3.52809	1.87724	2.7876	1.87703	1.17242	1.6588	0.274671	1.05043	2.5624	0.692981	0.549655	1.96137	0.953997	2.3798	0.831073	1.24457	0.817273	0.851316	2.45749	0.159635	0.979541	0.159635	0.662998	0.159635	0.159635	1.10784	0.834608	0.926031	4.95013	1.77938	0.159635	0.751294	0.668198	0.159635	0.159635	1.91715	1.67769	1.297	2.87813	0.840276	0.493066	0.746422	0.430045	0.959628	1.56132	0.547749
X - 13068			0.012446	0.012446	0.012446	0.012446	0.012446	0.012446	0.012446	0.012446	0.012446	0.012446	0.012446	0.012446	0.012446	0.012446	0.012446	0.012446	0.012446	0.012446	0.012446	0.012446	0.012446	0.012446	0.012446	0.012446	0.012446	0.012446	0.012446	0.012446	0.012446	1	0.012446	0.012446	0.012446	0.012446	0.012446	0.012446	0.012446	0.012446	0.012446	0.012446	0.012446	0.012446	0.012446	0.012446	0.012446	1	0.012446
X - 13082			0.6452	0.6452	0.6452	0.6452	0.6452	0.6452	0.6452	0.6452	0.6452	0.6452	0.6452	0.6452	0.6452	0.6452	0.6452	0.6452	0.6452	0.6452	0.6452	0.6452	0.6452	0.6452	0.6452	0.6452	0.6452	0.6452	0.6452	0.6452	0.6452	0.6452	0.6452	0.6452	0.6452	0.6452	0.6452	0.6452	0.6452	0.6452	0.6452	0.6452	0.6452	0.6452	0.6452	0.6452	0.6452	0.6452	0.6452
X - 13086			1.4502	0.264361	0.264361	0.264361	0.264361	0.628626	0.264361	0.264361	0.264361	0.264361	0.264361	1.46978	0.264361	4.18251	0.280433	1.03679	0.264361	0.264361	0.713933	0.264361	1.52859	0.264361	0.264361	1.18093	2.85259	0.264361	0.734735	1.23255	3.31844	0.264361	0.264361	1.26712	0.264361	1.22865	0.264361	0.983922	0.264361	0.264361	2.0613	0.264361	0.588071	1.11692	1.95317	0.264361	1.18914	0.264361	0.264361
X - 13098			0.48557	0.48557	0.48557	0.48557	0.48557	0.48557	0.48557	0.48557	0.48557	0.48557	0.48557	0.48557	0.48557	0.48557	0.48557	0.48557	0.48557	0.48557	0.48557	0.48557	0.48557	0.48557	0.48557	0.48557	0.48557	0.48557	0.48557	0.48557	0.48557	0.48557	0.48557	0.48557	0.48557	0.48557	0.48557	0.48557	0.48557	0.48557	0.48557	0.48557	0.48557	0.48557	0.48557	0.48557	0.48557	0.48557	0.48557
X - 13143			0.756531	0.756531	0.756531	0.756531	0.756531	0.756531	0.756531	0.756531	0.756531	0.756531	0.756531	0.756531	0.756531	0.756531	0.756531	0.756531	0.756531	0.756531	0.756531	0.756531	0.756531	0.756531	0.756531	0.756531	0.756531	0.756531	0.756531	0.756531	0.756531	0.756531	0.756531	0.756531	0.756531	0.756531	0.756531	0.756531	0.756531	0.756531	0.756531	0.756531	0.756531	0.756531	0.756531	0.756531	0.756531	0.756531	0.756531
X - 13145			0.048044	0.048044	0.048044	0.048044	0.048044	0.048044	0.048044	0.048044	0.048044	0.048044	1.23192	0.048044	0.048044	0.048044	0.048044	0.048044	0.048044	0.048044	0.048044	0.048044	0.048044	0.048044	0.048044	0.048044	0.048044	0.048044	0.048044	1	0.857217	0.048044	0.048044	0.048044	0.048044	1	0.048044	0.048044	0.048044	0.048044	0.048044	0.048044	0.048044	0.048044	0.048044	0.048044	0.048044	0.048044	0.048044
X - 13159			0.644809	0.644809	0.644809	0.644809	0.644809	0.644809	0.644809	0.644809	0.644809	0.644809	0.644809	0.644809	0.644809	0.644809	0.644809	0.644809	0.644809	0.644809	0.644809	0.644809	0.644809	0.644809	0.644809	0.644809	0.644809	0.644809	0.644809	0.644809	0.644809	0.644809	0.644809	0.644809	0.644809	0.644809	0.644809	0.644809	0.644809	0.644809	0.644809	0.644809	0.644809	0.644809	0.644809	0.644809	0.644809	0.644809	0.644809
X - 13162			0.737008	0.737008	0.737008	0.737008	0.737008	0.737008	0.737008	0.737008	0.737008	0.737008	0.737008	0.737008	0.737008	0.737008	0.737008	0.737008	0.737008	0.737008	0.737008	0.737008	0.737008	0.737008	0.737008	0.737008	0.737008	0.737008	0.737008	0.737008	0.737008	0.737008	0.737008	0.737008	0.737008	0.737008	0.737008	0.737008	0.737008	0.737008	0.737008	0.737008	0.737008	0.737008	0.737008	0.737008	0.737008	0.737008	0.737008
X - 13176			1.96182	0.208153	0.762818	0.632811	0.208153	0.786879	0.208153	0.208153	3.50972	1.50724	0.208153	0.208153	0.208153	0.208153	0.208153	0.208153	0.208153	0.512605	0.208153	0.684978	0.208153	0.208153	0.208153	0.208153	0.208153	0.208153	0.839057	0.316827	1.02355	0.208153	0.208153	0.208153	1.5559	0.606186	0.208153	0.208153	0.208153	0.815155	3.5129	3.07615	0.208153	0.208153	0.208153	3.94361	7.90776	0.50579	0.208153
X - 13215			0.932272	1.64739	0.917483	1.33963	0.422357	0.941536	1.13976	1.23062	1.85246	0.470042	1.2083	0.682969	1.51319	0.854873	1.29507	0.751261	2.28956	0.908062	2.11406	1.41149	0.516424	1.89734	0.575236	1.03463	0.84006	0.94329	1.19878	1.15425	1.47505	0.559737	1.19827	0.351744	0.501572	0.990945	1.55057	0.877049	0.4636	0.983942	1.10146	0.762044	1	1.4116	0.771184	1.3701	1.72894	0.689614	0.860156
X - 13230			1.16746	0.757449	1.01236	1.19156	1.65218	1	1.18025	0.745041	1.18036	1.13817	1.0423	1.09624	0.890939	1.5566	0.806406	0.834066	1.26332	1.22153	1.49429	1.6913	1.05571	1.74734	1.3605	1.29377	0.806395	0.918222	1.03504	1.51772	1.4412	1.82272	0.676656	1.39441	0.868541	1.14956	1.17952	1.21191	1.22041	1.38714	1.36378	1.05792	1.02074	1.29033	1.34315	1.13181	1.79055	1.38198	1.83361
X - 13342			0.151732	0.451925	0.80967	0.151732	1.04654	0.406942	0.151732	0.151732	1.98381	1.10537	2.30246	1.33782	0.910196	1.42603	0.151732	0.538531	7.60022	0.151732	2.41828	0.456526	2.47588	6.48934	1.41346	4.90314	0.854508	0.151732	0.151732	2.9244	1.48325	0.787439	0.492927	1.04887	0.481918	2.09386	0.380034	3.432	1.25585	1.10464	0.502443	0.151732	0.695455	1.11555	0.9334	0.605408	0.799852	0.561914	1.13821
X - 13368			0.211196	0.211196	0.211196	0.211196	0.211196	0.211196	0.211196	0.211196	0.211196	0.211196	0.211196	0.211196	0.211196	0.211196	0.211196	0.211196	0.211196	0.211196	0.211196	0.211196	0.211196	0.211196	0.211196	0.211196	0.211196	0.211196	0.211196	0.211196	0.211196	0.211196	0.211196	0.211196	0.211196	0.211196	0.211196	0.211196	0.211196	0.211196	0.211196	0.211196	0.211196	0.211196	0.211196	0.211196	0.211196	0.211196	0.211196
X - 13391			0.764934	0.385679	0.103946	0.346912	0.920625	0.87673	0.585741	0.489964	1.40977	0.589085	1.72046	1.0531	0.668135	2.05089	0.26883	0.842761	0.61314	0.526124	1.40043	1.39338	0.56989	0.995241	3.24405	2.02462	0.880404	1.43668	1.48628	1.37163	1.8859	0.802002	0.328112	1.37194	1	0.862723	1.06064	0.552153	0.533883	2.71188	0.71604	0.601289	0.153302	1.70915	0.477645	1.02336	2.59828	2.75189	0.978677
X - 13396			1.966	0.09145	0.71274	0.066368	0.106324	0.973686	0.128241	0.839219	0.735674	0.218604	1.73339	0.598366	0.126309	0.554037	0.119041	1.42745	2.34424	0.91314	0.650113	0.292511	0.623649	1.34252	1.84556	2.27401	1.43083	1.65132	0.398357	2.54286	2.34082	0.03526	0.071587	3.24201	0.702125	1.22183	0.03526	0.03526	0.121421	1.39121	2.09403	0.089308	0.58177	1.66444	0.736618	0.03526	0.899841	0.448281	1.92243
X - 13421			0.881196	1.42241	0.944884	1.40477	0.809017	1.02049	0.803821	2.01195	0.741525	1.32039	0.195026	3.58406	4.1635	1.11586	2.98512	6.7336	0.195026	2.33392	0.195026	0.640024	1.05485	0.195026	0.195026	0.195026	1	1.19772	0.195026	0.195026	0.976885	0.774134	5.61072	0.195026	1.32696	0.195026	0.95988	0.195026	0.929607	0.491163	2.05294	4.0406	1.49695	0.195026	0.195026	0.195026	1.51959	2.70856	0.195026
X - 13423			1.74777	0.069449	0.383473	0.041774	0.0885	1.02859	0.132051	0.127506	1	0.295464	1.54883	0.683624	0.121012	0.684498	0.124913	0.731987	3.09673	0.512744	1.9565	0.250611	0.892477	1.39951	1.16611	3.10675	0.899714	1.07713	0.718416	1.96456	1.54322	0.061146	0.117837	1.28941	0.839229	1.56088	0.457727	1.42645	0.171104	0.965213	0.926866	0.100506	0.362161	2.66405	0.908952	0.337853	1.14155	0.315032	1.31836
X - 13445			1.40037	1.1478	0.361589	2.16113	15.3356	1.5448	6.4741	0.86182	5.90124	5.46329	8.68055	5.65809	9.43531	14.5568	3.06873	1.23909	0.602925	1	0.853606	1.04031	0.318363	5.09003	1.38133	1.14228	1.01731	0.330766	3.17561	3.00794	0.433127	24.9217	6.26584	0.833671	2.25405	0.481835	8.96861	0.163239	48.0422	5.27499	3.3654	1.99507	4.22989	1.0012	0.359566	15.7122	2.05427	41.2726	0.218467
X - 13446			0.558173	2.40185	0.733212	0.940719	3.0132	1.85591	3.33164	0.009115	4.40933	2.0344	7.2266	3.56033	4.97892	2.08478	2.41202	0.391088	0.004623	0.935223	0.850459	2.75991	0.004623	2.64255	0.662889	1.90993	0.907405	0.00763	2.83628	1.43849	0.64323	10.6293	1.62243	0.004623	1.45886	0.004623	5.29654	0.004623	3.11233	3.11067	1	0.53148	1.05221	0.559635	0.004623	9.64614	1.05621	4.01531	0.004623
X - 13447			0.366559	0.205744	0.614585	0.58434	0.743123	0.464361	0.205744	0.205744	0.437097	0.360142	2.30223	0.672523	0.205744	0.823713	0.579597	0.205744	0.205744	0.205744	1.28476	1.67424	0.205744	0.205744	0.205744	0.750234	0.205744	1	3.19242	0.554759	1.55849	0.205744	0.205744	1	0.205744	0.205744	1.87978	1.25162	1.2057	1.26432	0.836935	0.585885	0.205744	0.205744	0.205744	0.827095	0.205744	0.205744	0.803455
X - 13451			0.812997	5.35732	0.887755	0.407893	8.15945	1.97983	1.26159	1.03401	4.44768	2.1387	3.90466	0.133433	1.21419	2.14743	0.936752	0.133433	0.965865	0.133433	0.374747	1.68868	0.133433	2.70329	0.995092	1.46253	0.6825	0.551746	2.26022	0.817656	0.761837	4.74691	1	0.473154	0.969289	0.133433	5.34225	0.133433	9.56793	1.6822	0.133433	0.133433	1.34213	0.914403	0.133433	1.13441	1.05382	0.961628	0.133433
X - 13478			0.88387	0.480868	0.205245	1.60592	1.45525	0.772479	1.18941	0.883906	0.591869	0.730944	1.22291	1.10848	1.19377	1.08924	0.74679	1.13963	2.46134	1.30186	1.92439	1.05476	1.0149	0.200946	1.54737	3.06603	1.09579	1.28902	1	2.55621	1.00913	1.33923	1.093	1.01148	1.0153	1.00404	1.04421	0.953601	0.751433	0.784726	0.947216	0.919654	0.988675	0.810272	2.64197	1.84105	1.0603	0.867457	1.16786
X - 13483			4.22654	0.773653	0.568917	0.631672	1	1.29987	0.530253	0.732571	2.3814	1.4782	2.66186	2.81887	0.179321	2.79192	1.46637	2.56558	3.23538	4.21223	4.25823	6.41644	4.17659	2.23167	3.24581	3.61021	14.2928	1	0.45518	4.67939	1.01752	0.77531	0.179321	1.32131	5.71311	1.11234	0.221456	8.11863	1.51155	3.71504	0.296295	0.179321	1.99839	3.43198	1.11264	3.92484	1.73644	5.15196	1.95941
X - 13504			0.593116	0.152301	0.152301	0.621985	0.502305	0.152301	0.683658	0.152301	0.388668	0.152301	1.702	0.508363	0.152301	0.152301	0.152301	0.380478	0.743838	0.152301	1.00766	0.152301	1.11282	2.24586	3.46927	2.26006	1.10975	0.316864	0.316218	3.09543	0.43999	0.152301	0.285343	1.80639	0.941473	1.23723	0.328696	1.20703	0.992337	1.04577	0.8966	0.152301	0.835529	3.27518	1.95781	2.08625	0.152301	0.572824	3.36516
X - 13512			0.307788	0.107211	0.293583	0.190668	0.22237	0.323904	0.362056	0.107211	0.933549	0.342928	1.92024	0.899816	0.31157	0.519411	0.269132	0.485258	7.16904	0.433169	2.7517	0.656676	0.513589	1.08941	0.830719	1.77104	0.453362	0.191159	0.694676	1.29301	1.10636	0.167937	0.170665	0.904256	0.238982	1.10546	0.409636	3.49637	0.306661	0.524777	0.37584	0.207085	0.869202	1.34589	1.49569	1	0.735167	0.678345	1.02053
X - 13520			1.5032	0.131456	0.414403	0.131456	0.271942	0.700236	0.18387	0.131456	0.851386	0.927837	1.81042	0.793766	0.131456	0.630607	0.131456	0.90327	0.942219	0.131456	1.95948	0.510683	0.73146	0.816376	0.931141	4.22818	0.788813	0.52601	0.745982	1.4992	1.28053	0.131456	0.131456	1.75503	1.01731	1.43725	1.45034	0.690293	0.131456	0.760662	1.24097	0.131456	0.194567	1.68641	0.924307	1.65193	0.984548	0.636622	1.62565
X - 13529			1.22321	0.364139	0.247402	0.470363	0.899891	1.0415	1.09978	2.18605	0.958597	0.920439	1.67978	0.780402	0.601718	1.19488	0.724277	0.862999	0.821985	0.922102	1.0709	0.491776	1.07551	1.14164	1.254	1.09822	0.77844	1.95761	1.17897	1.11905	0.878181	0.186861	0.585956	1.12668	0.996444	1.39895	0.538725	1.02466	1.00907	0.992003	1.29971	0.845698	0.686624	1.43921	1.10826	0.744682	0.957765	1.07528	1.19374
X - 13543			0.081903	0.234714	0.081903	0.081903	0.081903	0.081903	0.081903	0.081903	0.081903	0.64261	0.081903	0.081903	0.965648	0.081903	1.86234	0.081903	0.081903	0.081903	0.081903	0.081903	0.176222	0.721252	0.23567	0.081903	2.68618	0.081903	0.475157	0.081903	0.081903	1.88264	1.11079	0.081903	0.081903	2.85625	0.081903	14.7258	2.57514	0.619771	0.081903	0.322247	2.09254	0.081903	1	0.081903	0.081903	0.081903	3.10097
X - 13557			2.53163	1.7074	0.407053	0.859128	0.407053	0.407053	1	0.407053	0.407053	2.55891	0.768684	0.407053	1	1	0.407053	0.407053	0.407053	0.407053	0.407053	6.16347	0.407053	0.407053	0.407053	0.407053	0.407053	0.407053	2.22098	0.407053	0.407053	1.18926	1.74077	0.407053	0.407053	0.407053	0.407053	0.407053	0.925574	2.82216	0.407053	0.407053	0.407053	0.407053	0.407053	0.407053	0.826453	4.29986	0.407053
X - 13558			0.294592	0.830217	0.294592	0.294592	0.294592	0.294592	0.294592	1.091	0.294592	0.294592	0.880981	0.294592	0.294592	0.294592	0.294592	0.294592	0.942867	0.294592	0.294592	1.3296	0.294592	0.294592	0.294592	0.294592	1.33949	0.395155	0.294592	1.41204	0.768797	0.294592	1.38983	0.507848	0.294592	0.294592	1.2047	0.294592	0.294592	0.709626	1.45108	0.294592	0.294592	0.294592	0.294592	0.294592	0.294592	1.01822	1.17124
X - 13560			0.137167	1.12158	1.01324	0.930039	0.137167	1.14092	2.9715	0.921753	0.528661	1.32637	0.799113	1.10071	1.24734	0.137167	0.803658	0.767879	0.623003	0.672491	0.498557	1.61151	1.47649	0.84684	0.567536	1.08599	1.09036	0.137167	1.03358	1.95152	1.02713	1.15047	1.35808	0.883881	1.02473	1.04035	0.78326	0.561361	1.00819	1.31549	1.49038	0.137167	0.549954	1.78983	0.581821	0.255808	0.663751	1.42357	0.832528
X - 13647			0.081454	0.081454	0.081454	1.42127	0.081454	0.081454	0.081454	0.081454	0.081454	0.081454	0.081454	0.081454	0.081454	0.081454	0.081454	0.081454	0.081454	0.081454	0.081454	0.081454	0.081454	1.63167	0.081454	0.081454	0.081454	0.081454	0.081454	0.081454	0.081454	0.081454	0.081454	0.081454	0.081454	0.081454	0.081454	0.081454	0.081454	0.081454	0.081454	0.081454	0.081454	0.081454	0.081454	0.081454	0.081454	0.081454	0.081454
X - 13698			0.357003	0.096284	0.096284	0.096284	0.096284	0.096284	0.096284	0.096284	0.733075	0.096284	0.808664	0.096284	0.096284	0.096284	0.096284	0.096284	0.096284	0.096284	0.096284	0.096284	0.871598	1.31963	0.096284	0.096284	0.096284	0.096284	0.769661	0.096284	0.096284	0.096284	0.096284	0.096284	0.096284	0.096284	0.096284	0.096284	0.096284	0.580909	0.096284	0.096284	0.096284	1.07154	0.631683	0.685845	0.096284	0.096284	0.096284
X - 13699			0.069445	0.069445	0.069445	0.069445	0.069445	0.069445	0.069445	0.069445	0.653669	0.069445	0.069445	0.069445	0.069445	0.372426	0.069445	0.069445	0.069445	0.069445	0.069445	0.069445	0.069445	0.069445	0.069445	0.069445	0.069445	0.069445	0.069445	0.069445	0.069445	0.069445	0.069445	0.069445	0.069445	0.069445	0.069445	0.069445	1.32474	2.34676	0.069445	0.069445	0.069445	0.069445	0.069445	0.069445	2.00989	0.069445	0.069445
X - 13709			0.201187	0.201187	0.201187	0.201187	0.201187	0.201187	0.201187	0.201187	0.201187	0.201187	0.201187	0.201187	0.201187	0.201187	0.201187	0.201187	1.60514	0.201187	0.201187	0.201187	0.658916	0.201187	0.201187	0.201187	0.201187	0.201187	0.201187	0.201187	0.201187	0.201187	0.201187	0.201187	0.201187	0.201187	0.201187	0.201187	0.201187	0.201187	0.201187	0.201187	0.201187	0.201187	0.201187	0.201187	0.201187	0.201187	0.201187
X - 13734			0.40109	0.40109	0.40109	0.40109	0.40109	0.40109	0.40109	0.40109	0.40109	0.40109	1.01867	0.40109	0.40109	0.40109	0.40109	0.40109	0.40109	0.40109	0.40109	0.40109	0.40109	0.40109	0.40109	1	0.40109	0.40109	0.40109	0.40109	0.981325	0.40109	0.40109	0.40109	0.40109	0.40109	0.40109	0.40109	0.40109	0.40109	0.40109	0.40109	0.40109	0.40109	0.40109	0.40109	0.40109	0.40109	0.40109
X - 13737			0.111672	0.111672	0.389394	0.550946	0.280741	0.111672	0.111672	0.111672	0.111672	0.111672	0.30751	0.512178	0.313932	0.267535	0.111672	0.617499	0.629132	0.111672	0.99929	0.329496	1.03754	0.24534	0.111672	0.4559	0.637659	0.768699	0.368039	0.426371	0.111672	0.111672	0.111672	0.607713	0.111672	0.111672	0.111672	0.111672	0.111672	0.470719	0.379414	0.111672	0.111672	0.351285	0.370014	0.237198	0.387169	0.111672	0.83117
X - 13844			0.675173	0.675173	0.675173	0.675173	0.675173	0.675173	0.675173	0.675173	0.675173	0.675173	0.675173	0.675173	0.675173	0.675173	0.675173	0.675173	0.675173	0.675173	0.675173	0.675173	0.675173	0.675173	0.675173	0.675173	0.675173	0.675173	0.675173	0.675173	0.675173	0.675173	0.675173	0.675173	0.675173	0.675173	0.675173	0.675173	0.675173	0.675173	0.675173	0.675173	0.675173	0.675173	0.675173	0.675173	0.675173	0.675173	0.675173
X - 13859			0.885712	3.14267	1.52081	5.68383	5.19699	4.25759	3.9646	4.06529	2.08318	2.35302	0.909338	1.13305	4.46898	2.15408	1.75127	3.18419	0.728356	3.98275	0.658772	3.12092	0.849601	1.65676	0.953646	0.883607	0.778222	1.97499	0.866911	0.98547	1.17054	3.89135	3.9531	0.80468	4.00443	0.685438	5.44571	0.613997	2.40494	5.69312	2.84817	4.70357	1.63622	0.848778	0.775716	0.952561	2.18527	2.86856	1.17806
X - 13871			0.987166	0.182513	0.162747	0.793557	2.29264	1.41006	1.15094	0.792245	1.00844	2.04662	1.51788	2.0801	1.30794	4.12351	1.00947	1.57278	0.818155	1.23618	4.18311	2.03186	1.40357	0.430775	0.590346	0.990528	1.2475	1.98048	0.98627	0.937578	1.24222	0.321313	0.71789	1.19936	1.10557	0.650577	0.866268	0.054478	0.73729	1.5719	0.647271	1.34118	1.16207	1.09512	1.14294	0.968786	1.8451	1.77153	1.13274
X - 13872			0.921425	0.65512	0.715965	0.182161	0.41653	0.590459	1.39854	1.08809	0.182161	0.423635	0.683024	0.989249	1.26875	0.734654	0.182161	0.182161	0.728589	0.182161	1.63396	1.20849	1.08914	0.182161	0.787716	0.182161	1	0.725212	0.55011	2.51378	1.08211	0.985917	0.763058	1.49742	0.923275	0.854584	0.45572	0.182161	0.527801	0.977147	2.108	0.182161	0.414854	0.814957	1.1835	0.182161	0.994697	0.682937	0.895053
X - 13975			0.510008	0.510008	0.510008	0.510008	0.510008	0.510008	0.510008	0.510008	0.510008	0.510008	0.510008	0.510008	0.510008	0.510008	0.510008	0.510008	0.510008	0.510008	0.510008	0.510008	0.510008	0.510008	0.510008	0.510008	0.510008	0.510008	0.510008	0.510008	0.510008	0.510008	0.510008	0.510008	0.510008	0.510008	0.510008	0.510008	0.510008	0.510008	0.510008	0.510008	0.510008	0.510008	0.510008	0.510008	0.510008	0.510008	0.510008
X - 14007			0.958261	0.958261	0.958261	0.958261	0.958261	0.958261	0.958261	0.958261	0.958261	0.958261	0.958261	0.958261	0.958261	0.958261	0.958261	0.958261	0.958261	0.958261	0.958261	0.958261	0.958261	0.958261	0.958261	0.958261	0.958261	0.958261	0.958261	0.958261	0.958261	0.958261	0.958261	0.958261	0.958261	0.958261	0.958261	0.958261	0.958261	0.958261	0.958261	0.958261	0.958261	0.958261	0.958261	0.958261	0.958261	0.958261	0.958261
X - 14015			0.027023	0.027023	0.027023	0.027023	0.027023	0.027023	0.027023	0.027023	0.027023	0.027023	0.027023	0.027023	0.027023	0.027023	0.027023	0.027023	0.027023	0.027023	0.027023	0.027023	0.027023	0.027023	0.027023	0.027023	0.027023	0.027023	0.027023	0.027023	0.027023	0.027023	0.027023	0.027023	0.027023	0.027023	0.027023	0.027023	0.027023	0.027023	0.027023	0.027023	0.027023	0.027023	0.027023	0.027023	0.027023	0.027023	0.027023
X - 14057			0.813395	0.197667	0.050034	0.829805	3.06489	1.86702	1.45586	0.791073	1.15936	2.60048	1.36579	2.11248	1.39981	4.58925	1.64759	2.40621	0.491563	0.903597	4.95706	2.08016	1.12249	0.642911	0.6623	0.714566	1.38903	2.18241	1.08052	0.211277	1.19113	0.526705	0.815074	0.745415	1.35817	0.624604	0.440221	0.331875	0.966214	1.48581	0.496623	1.55709	1.02577	1.00579	0.860572	0.50309	1.66706	0.84608	0.496572
X - 14108			0.593855	0.281072	0.339399	0.255423	0.386349	0.823813	0.524258	0.030153	2.17452	0.87713	5.15961	0.851516	0.955844	0.502839	0.584521	0.494228	3.49512	1.0071	3.46892	1.20097	0.959976	2.59837	2.2925	3.17058	1.07003	0.065234	1.70415	1.20934	1.61281	0.234143	0.407391	1.8112	0.030153	2.31974	2.57801	7.55916	0.538641	1.04384	0.442155	0.030153	1.04463	2.73781	1.34407	5.86857	0.75162	1.00371	1.88753
X - 14121			0.493745	0.374982	0.69464	0.461145	0.480041	0.845608	0.362005	0.042658	2.69213	0.770322	8.16007	1.11669	1.6137	0.634567	0.714026	0.476802	6.61033	0.56099	1.41078	2.43991	0.578809	5.27479	1.92496	3.27304	0.809667	0.061912	0.997153	0.997624	1.40588	0.263607	0.525106	2.08754	0.465712	2.16652	0.562553	5.24927	1.22613	1.86902	0.60219	0.435958	1.21986	2.58398	2.46055	3.48486	0.921179	0.892519	1.93528
X - 14141			1	0.2909	0.504733	0.198253	0.198253	0.449315	0.198253	0.198253	0.619264	0.198253	7.27707	0.910679	0.646268	0.198253	0.198253	0.198253	0.198253	0.198253	4.43694	1.0702	0.677933	4.28852	1.57786	4.45287	0.986086	0.198253	0.198253	0.689688	5.92382	0.198253	0.198253	1.54206	0.198253	1.72683	0.198253	7.03625	0.198253	0.552109	0.198253	0.198253	0.351819	2.54467	1.21959	0.198253	0.198253	0.198253	1.98
X - 14145			0.486539	0.233441	0.333143	0.25225	0.120414	0.588801	0.120414	0.120414	1.83147	0.460416	5.54237	0.736976	0.964287	0.460086	0.198589	0.329827	18.7064	0.925363	3.76638	0.838145	0.804232	2.36335	1.82911	4.01294	0.656536	0.193106	1.32998	1.08899	2.59573	0.120414	0.171669	1.58577	0.299599	3.1793	0.421756	12.2893	0.26431	0.784124	0.371871	0.120414	0.7539	3.6585	1.45982	1	0.695053	0.587709	1.95404
X - 14192			0.092072	0.596721	0.429297	0.333104	0.352237	1.00733	0.092072	0.092072	1.97137	0.752691	9.59656	1.05948	2.7369	0.654674	0.294728	0.583288	12.909	1.60549	3.44052	0.531215	0.766376	3.91717	3.70019	8.50358	1.13504	0.13262	0.8653	2.79071	3.65697	0.092072	0.478281	3.4424	0.434242	4.32994	0.630072	17.2684	0.317668	0.750557	0.50058	0.501076	1.23435	4.93142	2.80155	1.20466	0.855888	0.937305	2.27476
X - 14193			1.29587	1.14553	0.178976	0.178976	0.89473	1.15259	0.178976	0.178976	3.59929	1.9232	5.86328	0.70903	1.32268	0.178976	0.634631	0.544967	8.32824	0.999601	2.38787	1.14072	1.08907	5.67399	2.20978	3.69614	1.5295	0.178976	0.178976	0.178976	2.51063	0.549041	0.971294	1.62897	0.565374	1.71235	0.980989	8.77267	1.31428	1.7006	0.471508	0.647123	0.749234	2.31005	1.32833	1.54823	0.764104	0.774224	1.36413
X - 14195			0.450557	0.266232	0.192719	0.192719	0.192719	0.958077	0.192719	0.192719	2.25511	0.784328	5.88133	1.13103	1	0.323416	0.345936	0.49902	0.192719	1.04382	3.46028	1.14511	0.887356	0.897169	1.44404	4.9436	0.835061	0.192719	1.52058	1	2.18183	0.192719	0.276064	1.66027	0.192719	3.29645	0.192719	9.69647	0.510491	0.710708	0.294283	0.192719	0.607688	4.00946	1.91228	0.192719	0.837599	0.700451	1.73031
X - 14264			0.263827	0.263827	0.263827	0.263827	0.263827	0.263827	0.263827	0.263827	0.263827	0.263827	3.5467	0.520411	0.263827	0.263827	0.263827	0.263827	0.263827	0.263827	1.59587	0.263827	0.263827	0.263827	0.263827	1.30643	0.263827	0.263827	0.263827	0.263827	0.91787	0.263827	0.263827	0.728562	0.263827	1.38238	0.263827	2.79416	0.263827	0.337658	0.263827	0.263827	0.263827	1	1.19326	0.263827	0.263827	0.263827	0.929088
X - 14272			2.51536	0.672508	1.49628	0.558581	0.748566	1.91965	0.012553	0.012553	7.02717	0.619248	13.6156	1.87407	4.17947	0.838235	0.501037	0.796799	6.22046	1.80445	13.9085	2.28443	2.12655	27.6901	16.0552	16.4084	6.73166	0.118793	2.51207	2.40207	11.2425	0.290776	0.893032	9.64298	0.544914	9.22103	0.717114	50.6135	0.690322	1.38659	0.578158	0.422255	3.28038	10.4364	6.55266	1.8651	0.763109	0.606214	3.88719
X - 14320			0.007071	1	0.007071	0.007071	0.007071	0.547116	0.007071	0.007071	1.71735	0.007071	4.18643	0.668699	0.922934	0.007071	0.411873	0.007071	3.84212	0.926603	4.00732	0.76873	0.696818	4.59804	1.18256	4.22733	1.48688	0.098077	0.007071	0.007071	2.80864	0.007071	0.007071	1	0.007071	1.37032	0.919872	13.0722	0.007071	0.007071	0.007071	0.007071	0.378501	2.66099	0.613159	1.88779	0.007071	0.007071	2.27396
X - 14331			0.503614	0.28558	0.28558	0.28558	1.15706	0.28558	0.28558	0.28558	0.83802	0.28558	2.435	0.28558	0.28558	0.596346	0.28558	0.28558	1.76404	0.28558	0.28558	0.69086	0.28558	4.84479	2.20967	3.10915	0.777141	0.28558	0.28558	0.633574	1.30201	0.28558	0.28558	1.49156	0.28558	0.607847	1.42356	3.20527	1.26639	0.488564	0.28558	0.412571	0.28558	1.2779	0.563192	1.54562	0.28558	0.28558	1.18988
X - 14346			0.749659	0.302412	0.865695	0.695333	0.302412	1.13167	1.0855	0.587792	2.20542	0.590125	0.984725	0.965158	1.47405	1.06612	1	1.38689	6.18433	1.17975	2.62776	0.685117	1.34401	1.56286	1.96969	2.19208	0.302412	0.981709	1	2.76816	2.951	0.629037	0.302412	0.886292	0.897645	3.89795	1.78041	1.27272	0.302412	1.191	0.302412	0.55541	0.302412	0.899818	0.663456	0.302412	1.17697	0.97989	1.01527
X - 14347			0.372088	0.372088	0.372088	0.372088	0.372088	0.372088	0.372088	0.372088	1.17785	0.874034	7.01563	0.753956	0.833531	0.372088	0.372088	0.372088	0.372088	0.372088	1.07107	2.38483	0.372088	2.60587	1.02752	1.32106	0.501529	0.372088	0.548969	0.853318	1.56445	0.372088	0.372088	1.38576	0.372088	1.24235	0.372088	2.75812	0.992568	2.02279	0.372088	0.372088	0.796698	1.12346	1.1765	0.372088	0.372088	0.714906	1.82848
X - 14384			1	0.466083	0.40176	0.40176	0.40176	0.40176	0.40176	0.40176	0.775192	0.69107	7.69135	0.897382	0.893584	0.40176	0.40176	0.40176	0.40176	0.40176	4.71363	1.03118	1.09813	2.30438	1.03609	2.55538	0.721984	0.40176	1	1.86065	2.68396	0.40176	0.40176	1.26207	0.40176	2.97547	0.40176	4.78395	0.742301	1.34927	0.612346	0.40176	0.712287	1.62994	1.66796	0.40176	0.654296	0.989094	2.45905
X - 14458			0.196983	0.196983	0.701255	0.196983	0.196983	0.196983	0.196983	0.196983	3.65799	0.196983	4.04076	0.547053	0.756206	0.196983	0.196983	0.196983	2.4083	0.196983	0.196983	1.10222	0.532014	13.2607	2.7464	5.37416	0.743345	0.196983	0.196983	0.196983	1.74883	0.196983	0.196983	0.660106	0.196983	0.714467	0.196983	5.73807	0.196983	0.714183	0.196983	0.196983	0.196983	1.98776	1.01357	0.196983	0.196983	0.196983	0.772466
X - 14503			0.079592	1.0915	0.079592	0.079592	0.079592	0.079592	0.079592	0.079592	0.079592	0.079592	0.940958	0.079592	0.079592	0.079592	0.079592	0.079592	6.68914	0.079592	0.079592	0.079592	0.581637	1.34892	1	1.05041	0.079592	0.107068	0.079592	0.079592	0.079592	0.079592	0.079592	0.079592	0.079592	0.079592	1.22957	0.079592	0.079592	0.962754	0.582445	0.079592	0.079592	1	0.769602	2.03905	0.079592	1	0.079592
X - 14590			0.266959	0.313834	0.266959	0.982563	1.28855	1.0935	1.29382	0.970287	1.23825	0.781239	0.872333	1.03648	1.29144	1.07442	0.987994	0.266959	0.659251	0.681682	0.889078	0.266959	0.547105	0.578616	0.470584	0.873201	0.266959	0.763276	0.619005	1.2411	0.499888	0.435753	0.558746	0.266959	0.907422	0.896447	1.31338	1.0512	1.06151	0.266959	1.17489	0.266959	0.835432	1.19645	0.266959	1.01568	0.655723	1.78276	0.621246
X - 14594			1.1327	0.085758	0.341555	0.085758	0.085758	0.751407	0.391847	0.383962	0.910209	0.700234	1	0.590371	0.085758	0.395663	0.136277	0.985352	1.46646	0.755604	1.12498	0.085758	0.979541	1.57312	1.94667	1.74875	0.757384	1.29004	0.67732	1.80467	1.17546	0.085758	0.085758	1.33833	0.754321	1.87163	0.759206	1.20034	0.085758	0.934886	1.0232	0.085758	0.442501	1.54119	0.904818	0.510732	1.23338	0.513136	1.06887
X - 14596			1.01337	0.27858	0.721587	0.752011	0.910096	1.09845	1.58956	1.28899	1.23039	0.625675	0.52942	2.06394	0.653613	1.05891	0.39752	1.46612	0.866019	1.29354	0.227837	0.618751	0.750933	0.920018	0.943522	0.975582	0.853013	2.15983	1.3304	1.04594	1.06926	0.41873	0.753964	0.814992	1.0987	0.696661	1.0705	0.484021	1.06388	1.83524	0.986241	0.943402	1.03449	0.931615	0.915924	1.24096	1.53652	1.48014	0.777739
X - 14600			0.264345	1.67332	0.322651	3.79308	0.7175	1.73797	0.830954	0.795493	0.264345	0.486462	0.264345	0.680047	0.940698	0.716087	1.00654	0.632256	4.15197	0.779475	2.99517	0.264345	0.495042	0.667254	0.264345	1.31661	0.264345	0.392747	0.952123	0.944513	0.264345	0.264345	0.264345	0.264345	0.925184	1.41339	1.00941	0.914934	0.57613	0.264345	0.556363	0.352791	0.752771	0.819661	0.872684	0.900599	0.296464	1.00956	0.264345
X - 14606			1.20713	0.348126	0.46401	0.557583	2.83116	0.684792	1	0.254892	1.12653	2.29035	0.254892	2.31824	0.969575	3.52203	1.00999	2.77874	0.254892	0.375138	2.06518	2.05433	2.78797	0.809594	1.01653	0.254892	0.721799	1.48662	1.09911	1.29597	2.93685	1.06036	1	0.879798	1.49286	0.900711	3.36811	0.254892	2.5969	1.03365	5.5003	4.18956	3.38354	0.702198	1.00696	0.254892	1.19475	1.08751	0.513175
X - 14613			0.072743	0.072743	0.072743	0.072743	0.072743	0.072743	0.072743	0.072743	0.072743	0.12406	0.476136	0.072743	0.072743	0.072743	0.072743	0.072743	0.072743	0.072743	0.072743	0.072743	0.072743	0.072743	0.072743	0.072743	0.072743	0.072743	0.072743	0.072743	0.072743	0.072743	0.072743	0.072743	0.072743	0.072743	0.072743	0.206994	0.072743	0.072743	0.072743	0.072743	0.072743	0.072743	0.072743	0.072743	0.072743	0.072743	0.072743
X - 14696			0.298225	0.298225	0.298225	0.298225	0.298225	0.298225	0.298225	0.298225	0.298225	0.298225	2.93227	0.298225	0.298225	0.298225	0.298225	0.298225	0.298225	0.298225	0.405512	0.298225	0.298225	0.298225	0.298225	1.89982	0.298225	0.298225	0.298225	0.298225	1.02513	0.298225	0.298225	0.298225	0.298225	1.65147	0.298225	3.66635	0.298225	0.298225	0.298225	0.298225	0.298225	1	0.765805	0.298225	0.298225	0.298225	0.636431
X - 14837			4.88759	1.32458	0.701412	0.480926	0.934668	5.15428	3.36594	0.69809	1.14134	1.57025	2.0195	0.982499	1	1.44352	0.274967	2.67883	5.61587	0.536351	1.35036	2.36672	0.902344	3.3079	1.08854	1.67495	1.12537	3.43728	1.01295	2.82771	0.573461	1.12075	1.52608	2.50091	0.771818	0.274967	2.09603	0.274967	0.592703	1.4422	1	0.748869	0.274967	1.64335	0.704007	1.05254	1.58378	6.05093	1.56969
X - 14900			0.566749	0.442241	0.442241	0.442241	0.442241	0.442241	0.442241	0.442241	0.852418	0.442241	7.07575	0.950814	1.31051	0.442241	0.442241	0.442241	0.442241	0.442241	1.20106	0.957101	0.442241	0.442241	0.743612	1.30793	0.442241	0.442241	0.442241	0.442241	1.4177	0.442241	0.442241	1	0.442241	1.37554	0.442241	4.3157	0.442241	0.568211	0.442241	0.442241	0.442241	1.1802	0.958244	0.442241	0.442241	0.610419	1.64158
X - 15136			0.517012	0.084227	0.538667	0.419053	0.634243	0.583598	0.80822	0.852906	0.489212	0.485897	0.594324	0.811433	0.084227	0.769663	0.373436	0.821984	0.789851	0.404893	1.07961	0.425391	0.856281	0.084227	0.705685	1.49135	0.575384	1.13673	0.690324	0.586364	0.863733	0.634438	0.220137	0.990383	0.811232	0.580721	0.084227	0.599006	0.084227	0.287301	0.925265	0.304472	0.374284	0.662589	0.763974	0.245693	0.750581	0.593129	0.523422
X - 15150			0.439109	0.439109	0.439109	0.439109	0.439109	0.439109	0.439109	0.439109	0.439109	0.439109	2.98442	0.439109	0.439109	0.439109	0.439109	0.439109	0.439109	0.439109	1.13165	0.476503	0.490956	0.921356	0.439109	1.3419	0.439109	0.439109	0.439109	0.86835	1.05531	0.439109	0.439109	0.439109	0.439109	1.04888	0.439109	1.87494	0.439109	0.573392	0.545874	0.439109	0.439109	0.795498	0.673068	0.439109	0.439109	0.439109	0.943202
X - 15160			0.723815	0.221885	0.46743	0.633825	0.527718	0.97011	0.732187	0.259728	1.44519	0.455865	3.46184	1.01449	0.773008	1.00958	0.472908	0.580405	12.3514	0.992195	2.30516	1.38847	1.09733	2.1166	1.06466	3.27732	0.971554	0.404525	1.30051	1.4438	1.49347	0.449722	0.625969	1.01339	0.385987	1.68219	0.78038	2.87283	0.73237	1.64895	0.881786	0.55123	0.576448	1.77659	1.15187	1.60975	1.13443	0.94615	1.61681
X - 15166			0.881426	0.357947	0.550833	0.609758	0.171314	0.826961	0.171314	0.171314	2.12475	1.02652	5.85864	1	1.00547	0.932714	0.464372	0.511367	10.5205	0.964316	2.61417	0.948166	0.990477	2.40888	1.65077	4.61143	0.824222	0.213398	1.19661	2.24712	2.32897	0.171314	0.171314	1.83084	0.171314	3.80716	0.402132	9.84156	0.572472	1.14699	0.594456	0.408057	1.26677	3.44098	2.15597	1	0.769646	0.973483	1.79684
X - 15168			1.07305	0.051487	0.644256	0.478528	0.39226	1	0.357763	0.051487	1.94419	0.647683	8.28399	1.47188	1.31355	0.732912	0.430315	0.900337	7.71889	0.999377	4.48273	1.3415	1.25014	4.86548	3.51876	6.21018	1.24601	0.132921	1.82633	2.67604	4.55056	0.051487	0.412275	2.47557	0.61069	3.78684	0.668182	7.8694	0.699863	1.85143	1	0.471612	1.41529	4.18431	2.4933	1.64351	0.764053	0.586093	2.60245
X - 15174			0.462583	0.168845	0.36111	0.915839	1.47431	1.42115	0.495258	0.308597	3.07059	1.94234	1.95985	2.33215	3.50486	1.96029	2.12617	2.74659	0.94167	1.90287	2.29376	2.70621	2.22563	3.7342	0.978592	1.47532	1.16281	1.25138	1.48734	1.00163	3.36513	0.168845	2.70325	1.21915	1.38	1.51281	1.66904	1.71467	1.9139	2.25392	1.29423	2.80174	4.36955	0.809774	2.10746	1.08342	2.84527	1.83828	2.3237
X - 15220			1.04841	0.062611	0.206149	0.102865	0.27551	0.656766	0.204274	0.203523	0.685427	0.290824	1.9608	0.799903	0.171146	0.924087	0.118893	0.963417	4.28493	0.475246	1.05741	0.344478	1.74587	1.92181	1.73869	2.78984	1.00527	1.01114	0.741025	2.23935	3.05526	0.066188	0.144401	1.69701	1	2.29323	0.804884	1.5116	0.357622	0.970152	1.95372	0.106435	0.564123	2.56655	1.15285	1.26881	1.00296	0.898737	2.01865
X - 15222			1.37165	1.88465	0.662328	0.776863	0.903411	0.664594	0.880675	0.807568	1.25105	0.388483	1.32909	0.768451	1.20502	1.01443	1.10436	0.725295	1.66319	0.388483	1.41337	1.74763	0.388483	1.38541	0.576145	1.64695	0.805576	0.817505	1.31487	1.12418	1.11995	0.8622	1.00549	1.00853	0.388483	1.18206	0.388483	0.984427	0.388483	0.799286	1.80182	0.502803	0.674844	0.736019	0.94567	0.388483	1.70106	0.76721	0.973321
X - 15301			2.12383	1.00949	1	1.57759	0.615492	1.00123	2.22744	1.08533	1.5888	0.951995	0.952883	1.2756	1.14963	0.854376	0.145078	0.89223	0.678581	1.35736	1.10266	2.22357	0.997539	1.53132	0.712391	1.17179	1.40166	0.986598	1.32108	2.90706	0.86418	2.10769	1.23568	1.05013	0.852823	0.837786	2.23909	0.96723	0.757966	1.18042	2.35749	0.996745	0.575073	0.669724	1.08574	0.820432	2.1529	1.0177	0.881896
X - 15324			0.364243	0.364243	0.364243	0.364243	0.364243	0.364243	0.364243	0.364243	0.364243	0.364243	1.55555	0.364243	0.364243	0.364243	0.364243	0.724566	1	0.364243	2.41005	0.364243	0.364243	1.87888	1.9033	1.88609	1.73391	0.364243	0.364243	1.08709	4.51611	0.364243	0.364243	1.94739	0.364243	1.21348	0.364243	1.24723	0.364243	0.364243	0.364243	0.364243	0.364243	0.609367	0.798122	0.418443	0.364243	0.364243	1.02379
X - 15337			2.12913	0.072598	0.51234	0.056184	0.184516	1.00387	0.127293	0.235902	1.44651	0.257676	1.90612	0.824582	0.058101	0.721451	0.126443	0.805959	2.42075	0.52887	3.29468	0.274285	0.863842	1.81323	1.09766	3.75742	1.02442	0.892228	0.926865	3.2441	1.93436	0.056531	0.091644	0.806548	0.654212	1.58286	0.700515	1.37654	0.173636	1	1.17869	0.089379	0.424447	2.58341	0.787878	0.559145	1.13808	0.351376	1.0326
X - 15351			1.82297	0.101821	0.357109	0.101821	0.101821	1	0.101821	0.101821	1.08909	0.101821	1.48179	0.591967	0.101821	0.508038	0.101821	0.751774	2.40952	0.347475	2.02933	0.324514	0.726916	1.06619	1.06275	3.73016	0.994902	0.791094	0.86744	2.21932	1.25838	0.113617	0.101821	1.23001	0.758794	1.50175	0.23052	1.49618	0.348429	0.804686	1.34763	0.101821	0.35494	2.3663	1	0.101821	1	0.648617	1.39261
X - 15363			0.902153	0.490737	0.403725	0.318832	0.668604	1.05996	1.08863	2.08577	0.852829	0.365546	1.21928	0.614629	0.409968	1.48711	1.05927	0.680149	0.285009	0.787211	1.25537	0.528016	0.911061	1.49937	1.16594	0.936154	0.478456	1.13854	1.43077	0.829361	1.26144	0.373139	0.285009	0.834808	0.902524	0.792451	0.685706	0.62465	0.841076	1.29201	1.43065	0.838543	1.16881	1.06336	0.891009	0.377276	1.09875	1.13921	0.664672
X - 15371			1.26522	0.119111	0.378621	0.119111	0.119111	0.440201	0.477015	0.119111	0.610644	0.122736	4.26929	0.427309	0.469791	0.119111	0.119111	0.286198	1.52761	0.119111	1.32167	1	0.604169	6.08528	3.00405	5.22385	1.47757	0.119111	2.54259	4.36022	10.7081	0.119111	0.119111	1.73811	0.209402	2.69283	0.119111	2.45764	0.670462	0.921044	1.20978	0.321003	0.687279	1.62002	1.7267	0.119111	0.27734	0.305932	1.29747
X - 15375			6.36789	1.91917	1.88485	0.218154	0.217941	0.789497	1	1.77188	0.843334	2.44719	6.39453	2.81784	1.26781	2.41403	1.38984	6.07842	4.5311	1.4307	1.49443	1.79747	7.67957	14.7679	22.7111	14.5459	7.93328	1.12372	1.58225	3.34674	7.64522	0.61033	1.2263	11.4622	0.656379	11.6894	0.065256	31.3696	0.548499	2.09972	5.97918	0.392833	3.0155	11.2797	2.65362	0.065256	1.65344	0.409838	8.21973
X - 15382			1.64782	0.15948	0.227055	0.211275	0.114917	0.45154	0.180696	0.615374	0.652686	0.523606	1.05078	1.74237	0.273287	0.969652	0.21756	1.79863	1.43881	0.468021	2.39447	0.580694	2.14733	1.29818	2.47167	2.18192	1.23623	2.39044	0.694489	2.1398	2.00212	0.069314	0.150739	2.698	0.336734	2.23355	0.505035	2.05673	0.359472	0.902118	1.27423	0.31735	0.365526	2.93358	1.26402	0.794699	1	0.650438	1.49162
X - 15386			0.142726	0.212889	0.069225	1.15292	0.314093	0.069225	0.269067	0.490954	0.19834	0.241762	0.445089	0.069225	0.474087	0.069225	0.400576	0.069225	0.069225	0.522218	0.069225	0.069225	0.069225	0.069225	0.069225	0.069225	0.069225	0.236737	0.069225	0.069225	0.069225	0.069225	0.131551	0.069225	0.592362	0.069225	0.764634	0.235923	0.280684	0.069225	0.069225	0.069225	0.069225	0.069225	0.069225	0.069225	0.069225	0.069225	0.069225
X - 15415			1.17917	0.860044	3.00419	0.83896	0.176147	0.872573	1.88661	0.176147	0.869645	0.176147	1.21572	0.671212	1.3983	1.45866	0.652086	0.779838	0.981933	1.05855	2.6375	0.763241	0.827272	2.67031	1.12338	1.14278	0.879888	1.7455	2.23361	1.65389	1.43014	0.176147	0.790825	0.733562	0.176147	0.969233	0.760125	0.865399	0.176147	0.772303	1.66923	0.969227	1.09338	1.25343	1.18098	1.05886	1.53119	0.254949	1.18745
X - 15420			0.950619	0.098901	0.842759	0.497707	1.80221	2.34878	1.38394	0.712088	2.11859	0.718199	1.89217	2.67276	0.760668	1.99284	0.40621	1.07181	0.563529	1.22742	10.5163	1.42459	1.22995	1.67233	1.42745	1.41968	1.96002	3.06037	2.08668	3.1995	1.80929	0.098901	0.27955	0.720007	0.867743	0.681497	2.02125	0.333191	0.796003	1.5128	1.48218	0.648105	0.650796	1.37428	1.26776	2.00448	1.57292	1.37474	1.01469
X - 15472			0.241231	0.241231	0.241231	0.241231	0.673409	0.241231	0.241231	0.603898	0.241231	0.241231	3.56835	0.721552	0.261267	0.241231	0.241231	0.241231	2.53368	1.0772	1.36068	0.241231	0.582989	1.56401	0.241231	1.0682	0.723696	0.241231	0.670046	1.41002	1.06968	0.241231	0.373287	1	0.241231	2.36617	0.241231	1.90576	1.06238	1.31368	0.521784	0.241231	0.423295	2.13859	1.35533	0.714614	0.241231	0.808963	1.26587
X - 15482			1.3413	0.173797	0.579344	0.136553	0.292527	1.05353	0.382929	0.744392	1.29197	0.503863	1.65981	0.862504	0.136553	0.974006	0.220747	0.764947	2.57718	0.593468	1.62667	0.489683	0.662342	1.9664	1.11465	2.65395	1.09465	1.1659	1.13378	2.71801	1.22921	0.370439	0.256899	1.02599	0.75737	1.51752	0.818296	1.02937	0.412023	1.18942	1.0368	0.293419	0.785262	1.99519	0.896595	0.563989	1.01605	0.522707	0.71816
X - 15484			1.95996	0.182532	0.234077	0.212947	0.092426	0.417495	0.185189	0.663048	0.585242	0.524377	1.23637	1.67579	0.282713	0.950508	0.194786	1.61541	1.52115	0.462387	2.74475	0.578965	2.26622	1.10251	2.33781	2.46423	1.0856	2.43324	0.813575	2.35312	2.07389	0.080405	0.154911	2.64305	0.362464	1.75289	0.530549	1.8215	0.381083	0.871407	1.2678	0.302212	0.344679	2.67341	1.18933	0.884235	1	0.676302	1.60529
X - 15486			0.110334	0.110334	0.110334	0.735342	0.110334	0.110334	0.110334	0.110334	0.110334	0.110334	0.110334	0.110334	0.110334	0.110334	0.110334	0.110334	0.110334	0.110334	0.110334	0.110334	0.110334	0.110334	0.32471	0.110334	0.110334	0.110334	0.110334	0.14126	0.110334	0.110334	0.110334	0.110334	0.110334	0.110334	0.110334	0.110334	0.110334	0.110334	0.110334	0.110334	0.110334	0.110334	0.110334	0.110334	0.110334	0.110334	0.110334
X - 15494			0.250842	0.250842	0.250842	0.250842	0.250842	0.250842	0.250842	0.250842	0.250842	0.250842	0.250842	0.250842	0.250842	0.250842	0.250842	0.250842	0.250842	0.250842	1.0224	0.250842	0.250842	0.250842	0.250842	0.250842	0.250842	0.250842	0.250842	0.250842	0.250842	0.250842	0.250842	0.250842	0.250842	0.250842	0.463565	0.250842	0.250842	0.250842	0.250842	0.250842	0.250842	0.250842	0.250842	1.03039	0.250842	0.250842	0.250842
X - 15503			0.503863	0.366936	0.366936	0.88214	0.366936	0.366936	0.366936	0.366936	0.366936	1.40667	0.366936	0.366936	0.366936	0.366936	0.366936	0.366936	0.366936	0.366936	0.366936	0.366936	0.366936	0.366936	0.366936	0.366936	0.366936	0.366936	0.366936	6.02306	0.366936	0.366936	0.366936	0.366936	0.366936	0.366936	0.366936	0.366936	1.67523	0.366936	0.366936	0.366936	0.366936	0.366936	0.366936	0.366936	0.366936	0.366936	0.366936
X - 15520			0.193397	0.193397	0.193397	0.193397	0.193397	0.193397	0.193397	0.193397	0.341922	0.193397	0.835578	0.193397	0.193397	0.193397	0.193397	0.193397	0.888611	0.193397	0.193397	0.373893	0.193397	0.988271	0.456225	0.767936	0.193397	0.193397	0.193397	0.576538	0.619054	0.193397	0.193397	0.330494	0.193397	0.193397	0.193397	0.193397	0.193397	0.193397	0.432431	0.193397	0.193397	0.402106	0.193397	0.193397	0.193397	0.193397	0.193397
X - 15523			0.138638	0.138638	0.138638	0.138638	0.138638	0.138638	0.138638	0.138638	0.138638	0.138638	0.138638	0.138638	0.138638	0.138638	0.138638	0.138638	0.138638	0.138638	0.138638	0.138638	1.15834	0.138638	0.138638	0.138638	0.138638	0.138638	0.138638	0.138638	0.138638	0.138638	0.138638	0.740528	0.138638	0.138638	0.138638	0.138638	0.138638	5.57174	0.138638	0.138638	0.138638	0.138638	0.138638	0.138638	0.702661	0.138638	0.138638
X - 15534			0.153939	0.153939	0.153939	0.608277	0.153939	0.743715	0.153939	0.459139	0.501269	0.153939	0.569102	0.565756	0.663247	0.153939	0.614098	0.153939	0.153939	0.422088	0.153939	0.153939	0.153939	0.153939	0.153939	0.88486	0.153939	0.153939	0.153939	0.153939	0.153939	0.153939	0.153939	0.153939	0.901411	0.153939	0.153939	0.153939	0.509259	0.153939	0.153939	0.153939	0.153939	0.153939	0.153939	0.153939	0.153939	0.526718	0.267486
X - 15546			0.177441	0.177441	0.177441	0.177441	0.177441	0.177441	0.177441	0.177441	0.177441	0.177441	0.57571	0.225237	0.177441	0.177441	0.177441	0.329558	0.177441	0.177441	0.806251	0.177441	0.487211	0.692868	0.896898	1.08477	0.177441	0.405298	0.177441	0.864925	0.368254	0.177441	0.177441	0.693739	0.177441	0.536394	0.177441	1.95405	0.177441	0.177441	0.630113	0.177441	0.177441	1.08438	1.38274	0.351113	0.251439	0.177441	1.48382
X - 15564			0.949518	0.49028	0.410079	0.057895	0.057895	0.057895	0.172591	0.057895	0.503037	1.05048	2.24238	0.607724	1.75994	0.096556	0.472218	0.17886	0.837691	0.544774	0.181064	0.578125	0.813286	10.0979	3.62388	1.70843	1.02943	0.057895	0.899354	1.07217	1	1.41162	1.60408	1.13379	0.230853	1.18999	0.057895	5.80806	1.96418	1.0328	0.445807	0.487155	0.994175	2.0339	0.82068	0.057895	0.663933	0.401546	1.5853
X - 15565			0.767639	1.37226	0.200164	1.58856	0.200164	1.25707	0.779994	6.67934	0.200164	0.200164	1.417	0.76934	2.95918	2.30174	1	0.200164	0.620544	1.06476	0.200164	0.200164	0.200164	0.200164	1.61294	0.200164	1	1.57721	0.200164	0.77685	0.200164	0.79654	0.350255	0.200164	0.200164	0.200164	1.84634	0.200164	1.19808	0.956339	0.486948	0.200164	0.200164	0.200164	0.200164	0.200164	1.07809	0.961596	0.200164
X - 15572			0.052122	0.052122	1.60648	0.052122	0.052122	0.229995	3.87456	0.052122	0.052122	0.052122	0.052122	2.03861	0.052122	0.052122	0.052122	0.052122	0.052122	1	2.19124	0.052122	0.052122	0.052122	0.052122	0.052122	0.052122	0.052122	0.052122	0.052122	0.052122	0.052122	0.639321	0.052122	0.052122	0.913201	0.052122	0.052122	0.392156	0.052122	0.052122	0.202891	0.052122	0.052122	0.512546	0.052122	0.052122	0.052122	0.052122
X - 15576			0.008085	0.522089	0.04677	4.59329	0.425431	1.39903	0.556792	1	0.538935	0.388062	0.957376	1.1623	0.489995	0.262433	0.464636	0.950907	0.008085	0.609113	0.232878	0.376137	0.641132	0.565938	1.13288	0.506246	1.04909	0.896934	0.016808	1.31253	0.366986	0.167844	0.907501	0.521445	0.332984	0.457071	0.56724	0.255074	0.254054	0.008085	0.518372	0.742971	0.552327	0.272078	0.426951	1.00859	0.181757	0.183503	0.987202
X - 15577			0.800392	1	0.748537	0.606405	0.111032	1.2706	3.28638	0.64493	1.53288	0.329799	1.34783	1.23145	1.58557	1	1.84198	0.482432	1.73796	0.883933	1.55347	1.43469	0.815361	2.79812	1.19027	0.630284	0.461752	0.52292	2.24634	2.20319	1.02474	0.55557	1.07893	0.111032	0.378304	1.15519	0.46612	0.353641	0.487029	0.60113	0.616769	0.737947	0.870279	0.765583	0.111032	0.45505	2.07333	0.661092	0.111032
X - 15578			0.605466	15.3895	0.96734	0.087157	0.087157	7.22115	0.848154	0.257711	0.474453	0.087157	1	0.8852	2.22608	2.23054	0.611806	1	0.087157	1.47577	1.18914	0.539167	0.633455	0.542784	0.087157	0.087157	0.087157	0.087157	0.113561	0.087157	2.28659	0.349636	0.087157	0.087157	0.087157	0.228024	0.087157	0.087157	0.087157	0.087157	3.10539	0.553272	0.087157	0.513291	0.087157	0.087157	0.087157	0.300696	0.920508
X - 15579			0.878006	1.18333	1.04971	0.764675	0.196222	1.33182	3.48725	0.471551	1.4581	0.239475	1.46682	1.01598	2.06725	1	1.65156	0.438794	1.48859	0.854532	1.29088	1.86997	0.820414	2.96581	1.10975	0.537193	0.540772	0.881062	1.852	1.98261	0.758667	0.691004	1.53897	0.196222	0.57559	1.64519	0.39389	0.196222	0.547267	0.840452	0.651897	0.484152	1.07774	0.572214	0.196222	1.65471	1.66887	1.28075	0.196222
X - 15580			0.96	1.66402	0.718966	0.377844	0.242254	1.35214	3.63418	0.405999	1.54162	0.456329	1.73207	1.25334	1.46413	1.3432	1.64674	0.650737	1.23191	0.74357	1.46785	1.7009	0.805933	2.7366	1.08915	1.03299	0.398616	0.617379	2.05688	2.3412	1.29364	0.647255	1	0.242254	0.289268	1.71255	0.57601	0.242254	0.553595	0.91017	0.627628	0.796461	1.36527	0.679924	0.612659	0.242254	1.70209	0.849064	0.242254
X - 15581			0.659614	1.42215	1.28847	0.982557	18.794	0.747114	1.20807	0.206795	1.61608	0.162304	2.89903	0.162304	1.08441	0.598534	1.05951	0.528606	0.22205	0.848637	0.56992	1.27441	1.21879	1.80048	1	1.22355	1.00685	0.318376	1.50363	0.470872	1.01395	0.731573	1.06492	0.162304	0.162304	0.977007	12.6024	0.709139	1.20599	1.13383	0.616596	0.833378	0.838506	1.02825	0.617275	15.6434	1	0.701833	0.162304
X - 15591			0.851812	1.02964	0.734293	0.134928	0.134928	0.134928	0.134928	0.134928	0.134928	1.52692	1.26684	0.134928	0.682622	0.134928	0.134928	0.134928	1.79469	0.134928	0.635741	0.278469	0.781379	5.70584	3.17238	1.44355	1.18994	0.134928	0.134928	1.91804	1.65241	0.854734	1.06784	1.03363	0.134928	2.76166	0.134928	5.31996	1.09007	0.296192	0.134928	0.134928	0.583555	1.57102	1.5617	0.134928	0.134928	0.134928	1.74093
X - 15592			1.31096	0.340389	0.356264	0.59505	0.481533	0.686208	1	0.194061	0.783562	2.61387	1.96605	2.13555	0.939611	2.65621	0.588051	1.13294	1.3717	1.14413	3.2807	1.68884	5.80366	2.83759	1.79122	3.88676	2.49307	1.66104	0.804444	1.03453	2.38513	0.353612	1.11065	3.46114	0.609228	1.26363	0.387649	3.48756	0.194061	0.961278	0.727336	0.349405	0.194061	2.29665	1.41781	0.818812	2.55551	1.69063	2.35336
X - 15594			0.501984	0.501984	0.501984	0.501984	0.501984	0.501984	0.501984	0.501984	0.501984	0.501984	0.501984	0.501984	0.501984	0.501984	0.501984	0.501984	0.501984	0.501984	0.501984	0.501984	0.501984	0.501984	0.501984	0.501984	0.501984	0.501984	0.501984	0.501984	0.501984	0.501984	0.501984	0.501984	0.501984	0.501984	0.501984	0.501984	0.501984	0.501984	0.501984	0.501984	0.501984	0.501984	0.501984	0.501984	0.501984	0.501984	0.501984
X - 15595			0.475185	0.026801	0.026801	0.026801	1.37485	0.098495	0.026801	0.026801	0.026801	0.291173	0.026801	0.180849	1.81044	0.026801	0.026801	0.026801	0.026801	0.026801	0.026801	0.115294	0.026801	0.026801	0.106058	0.026801	0.026801	0.026801	0.291583	0.026801	0.026801	0.026801	0.026801	0.026801	0.142848	0.731366	0.026801	0.356373	0.026801	0.39916	0.026801	0.026801	0.026801	0.354408	0.026801	0.026801	0.146328	0.853425	0.269092
X - 15601			0.050027	0.43283	0.050027	3.80981	0.288889	1.25466	0.623727	0.907643	0.324954	0.359692	0.851226	1.03108	0.430821	0.256935	0.492419	0.917638	0.59502	0.486154	0.283039	0.196354	0.79963	0.050027	0.99097	0.377589	1.04392	0.954928	0.050027	1.38595	0.339519	0.166186	0.829613	0.471792	0.3556	0.530297	0.050027	0.182487	0.252593	0.050027	0.523215	0.634154	0.567212	0.198079	0.474344	1.91584	0.12428	0.236073	0.985811
X - 15602			0.071339	0.101815	0.071339	0.071339	0.071339	0.436477	0.071339	0.071339	0.071339	0.071339	0.071339	0.071339	0.071339	0.071339	0.071339	0.071339	0.071339	0.071339	0.071339	0.071339	0.071339	0.071339	0.071339	0.071339	0.071339	0.071339	0.071339	0.071339	0.071339	0.071339	0.071339	0.071339	0.071339	0.071339	0.071339	0.071339	0.071339	0.071339	0.653736	0.071339	0.071339	0.071339	0.071339	0.071339	0.071339	0.071339	0.071339
X - 15606			1.53944	0.014912	0.014912	0.014912	1.73986	0.014912	0.014912	0.014912	0.014912	1.79065	0.014912	0.067492	10.4455	0.014912	0.014912	0.014912	0.014912	0.014912	0.014912	0.634156	0.014912	0.014912	0.059964	0.014912	0.014912	0.014912	1.378	0.015662	0.014912	0.014912	0.014912	0.014912	0.842548	2.04783	0.177149	0.566866	0.014912	1.27754	0.014912	0.014912	0.18568	0.389143	0.027853	0.566944	0.412801	2.66112	0.28273
X - 15609			0.208417	1.28589	0.208417	1.05621	0.903041	1.01486	0.882158	0.659176	0.664143	1.2963	0.524076	0.208417	0.449669	0.418198	0.629499	0.965387	0.208417	0.208417	0.273855	1	0.671053	1.28916	0.396199	0.208417	0.453891	0.208417	0.921619	0.574019	0.208417	0.208417	2.1137	0.208417	0.693901	1.27622	0.997546	0.985863	0.499128	0.889437	0.73525	1.20052	0.407081	0.208417	0.208417	0.208417	0.208417	0.273744	0.233182
X - 15612			0.780039	1.38572	0.652167	0.029013	0.029013	5.47181	0.029013	0.029013	0.029013	0.029013	0.029013	0.029013	1.3213	1.80964	0.530834	0.029013	0.490009	0.35166	0.395456	0.029013	0.790629	0.029013	0.029013	0.029013	0.029013	0.166763	0.029013	0.029013	0.312324	0.029013	0.029013	0.029013	0.029013	0.029013	0.029013	0.029013	0.029013	0.029013	1.76231	0.029013	0.839897	0.029013	0.029013	0.029013	0.029013	0.029013	0.343224
X - 15624			0.476232	0.781977	0.476232	0.476232	1.0999	0.476232	0.476232	1.58849	0.476232	0.814798	0.895061	0.476232	0.476232	0.963777	0.476232	0.476232	1.13798	0.476232	0.476232	1.32614	0.960757	0.476232	0.76254	0.476232	0.715315	1.19141	0.476232	1.15187	1.16924	0.476232	0.476232	0.854601	0.476232	1.444	0.858503	0.476232	1.79246	1.14698	1	0.476232	0.830609	0.476232	1.72336	0.934539	0.476232	0.476232	1.12498
X - 15664			0.821973	0.392527	0.392527	1.58069	0.392527	0.71437	0.392527	0.392527	0.392527	1.68813	0.392527	0.392527	1.52074	0.392527	1.13462	0.392527	0.392527	0.392527	0.392527	0.392527	0.392527	0.392527	0.392527	0.392527	0.392527	0.771385	0.392527	1.23376	0.392527	0.392527	0.392527	0.392527	0.754261	0.392527	0.392527	0.392527	0.398553	0.392527	0.392527	0.879684	0.392527	0.392527	0.392527	0.392527	0.392527	0.872275	0.392527
X - 15678			0.901751	0.206335	0.165356	0.165356	0.666757	0.452079	0.165356	0.165356	0.959336	1.032	3.79609	0.165356	0.833347	0.165356	0.781468	0.80853	5.14608	0.604307	0.890697	0.647637	1	2.65685	4.26971	4.24367	3.51744	0.892589	1.19643	0.165356	4.09463	0.165356	1	3.27227	0.754208	2.46237	1.0358	12.1686	0.165356	0.165356	0.874031	0.165356	1.10638	2.42953	1.50762	1.91321	0.835451	0.165356	3.17725
X - 15680			1.19409	0.337877	0.39075	0.437752	0.076951	1.13352	0.972456	0.076951	1.72942	1.02343	5.14296	1.69241	1.39814	0.957011	0.404626	0.901316	4.78962	0.83827	7.8544	1.23836	1.31591	2.33436	1.31117	3.52359	1.14343	0.286325	1.78816	2.58592	1.72373	0.257825	0.579151	1.08706	0.57346	2.79513	0.73513	5.19169	0.665302	1.39339	0.733645	0.69816	1.0264	2.74039	2.31744	1.01063	0.793514	1.53845	1.70414
X - 15689			1.29651	0.327785	0.819125	0.489381	1.03245	0.922702	1.29605	1.55255	0.984818	0.001878	2.04955	2.32506	0.890397	0.954395	0.22335	1.00214	1.0202	0.733814	1.66389	1.00294	1.25516	0.402305	1.04141	2.46842	1.17918	1.04924	1.25152	0.839802	0.744907	2.1307	0.956229	1.53721	2.21604	1.12164	1.02451	1.01518	1.46305	0.635845	3.32309	2.32153	0.660384	1.21414	1.87614	0.800508	0.863675	2.62163	0.373388
X - 15691			2.96691	0.861805	0.957227	0.153017	0.359545	0.066961	0.066961	0.066961	0.370404	1.21696	17.4497	0.512289	1.14712	0.066961	0.216158	0.528191	71.8178	0.598281	0.414417	2.18367	1.6436	20.7382	20.8175	6.23182	5.06466	0.871043	1.46179	1.92229	6.96005	0.409678	1.04235	7.3286	0.066961	11.9501	0.066961	62.3559	0.521197	2.94466	1.27332	0.066961	2.27747	1.78493	1.60446	0.906043	0.360413	0.066961	16.9921
X - 15807			1.22433	0.275257	0.746244	0.275257	0.275257	0.587395	0.838459	0.275257	1.30528	1.15468	1.06707	1.7422	1.11815	0.925195	0.275257	1.39491	1.47147	0.84475	3.88814	1	1.9072	2.28968	1.22818	2.61309	1.23325	0.973293	1.07635	2.38058	2.0383	0.275257	0.663065	1.20044	0.609264	1.26859	0.622641	1.92207	0.94895	1.15426	1.59639	0.670098	1.36916	1.62569	2.22163	0.945784	1.35316	1.57803	1.84397
X - 15808			0.388985	3.71206	0.996516	1.49972	1	0.388985	1.9051	1.24943	0.388985	1.94936	0.855203	0.388985	1.09293	0.388985	1.3711	0.388985	0.388985	0.388985	0.388985	3.22561	0.388985	0.388985	0.388985	0.388985	0.388985	0.388985	0.388985	0.388985	0.781801	5.64428	1	0.388985	0.388985	0.388985	0.388985	0.388985	1	0.388985	0.388985	0.992306	0.388985	0.388985	0.388985	0.388985	0.388985	0.762149	0.388985
X - 15824			0.582605	0.582605	0.582605	0.582605	0.582605	0.582605	0.582605	0.582605	0.582605	0.582605	0.582605	0.582605	0.582605	0.582605	0.582605	0.582605	0.582605	0.582605	0.582605	0.582605	0.582605	0.582605	0.582605	0.582605	0.582605	0.582605	0.582605	0.582605	0.582605	0.582605	0.582605	0.582605	0.582605	0.582605	0.582605	0.582605	0.582605	0.582605	0.582605	0.582605	0.582605	0.582605	0.582605	0.582605	0.582605	0.582605	0.582605
X - 15825			0.540439	0.540439	0.540439	0.540439	0.540439	0.540439	0.540439	0.540439	0.540439	0.540439	0.540439	0.540439	0.540439	0.540439	0.540439	0.540439	0.540439	0.540439	0.540439	0.540439	0.540439	0.540439	0.540439	0.540439	0.540439	0.540439	0.540439	0.540439	0.540439	0.540439	0.540439	0.540439	0.540439	0.540439	0.540439	0.540439	0.540439	0.540439	0.540439	0.540439	0.540439	0.540439	0.540439	0.540439	0.540439	0.540439	0.540439
X - 15842			0.205713	0.671113	0.205713	1.20377	15.6553	0.205713	1.63999	0.205713	0.915043	1.53513	0.205713	0.205713	0.999879	1.33778	0.686565	0.205713	0.205713	0.661199	0.205713	1.04628	0.205713	0.205713	0.205713	0.205713	0.205713	0.205713	2.51724	0.205713	0.205713	3.39473	1	0.205713	0.205713	0.205713	0.205713	0.205713	3.50744	0.953721	0.312415	2.61367	0.813136	0.205713	0.205713	0.205713	0.822971	1.14266	0.205713
X - 16065			0.498703	0.212972	0.212972	0.212972	0.212972	0.577173	0.212972	0.212972	0.619458	0.212972	0.212972	1	0.212972	0.212972	0.212972	0.867002	0.212972	0.212972	0.386112	0.212972	0.53436	0.212972	0.212972	0.605873	0.212972	0.373286	0.212972	0.538365	0.248255	0.212972	0.212972	0.212972	0.437995	0.212972	0.212972	0.212972	0.212972	0.212972	0.629299	0.212972	0.212972	0.392049	0.212972	0.212972	0.477357	0.442384	0.212972
X - 16094			1.11943	0.099723	0.455098	0.210491	0.924101	1.12755	0.680938	0.753631	0.899607	0.393778	2.84153	1.3046	0.704783	1.36098	0.491388	1.57594	1.38444	0.509464	0.92614	0.567308	1.38835	0.932988	2.40749	1.49562	1.37173	2.8112	1.17262	2.54737	1.11956	0.402839	0.48847	2.3369	1.02977	0.821503	1.33476	0.83265	0.367165	0.877017	0.870089	0.622425	0.554079	3.33521	1.08506	1.08227	1.23371	1.21584	1.49498
X - 16103			0.542842	1.41584	0.39301	1.3925	1.07322	1.70195	0.983315	1.20106	0.580344	0.342837	0.342837	2.25284	1.24007	0.765335	1.92704	1.04821	0.626098	0.961577	0.472619	0.995354	0.830482	0.543997	0.755917	1.21766	0.723877	0.997903	0.705291	1.45493	0.661978	0.876233	1.3282	1.03632	1.74211	0.864148	1.86708	1.0709	1.52907	1.20951	1.06056	1.28738	1.19913	1.39814	0.782423	1.13265	0.626802	0.986781	0.614863
X - 16182			0.294782	0.468904	0.536799	0.577401	0.785639	0.706626	0.878492	0.294782	0.870368	0.294782	1.03682	1.05643	0.967383	0.294782	0.294782	0.294782	1.46897	0.294782	2.99749	0.294782	0.829645	1.44797	1.14334	1.66936	0.854491	0.294782	0.546464	1.30777	0.689686	0.294782	0.69895	0.77133	1	0.943923	0.872181	0.909991	0.599658	0.450179	0.767779	0.294782	0.976093	1.3052	0.294782	0.294782	0.387456	0.995326	0.628562
X - 16186			0.815403	0.161903	0.18337	0.161903	0.366671	0.161903	0.782414	0.161903	1.20007	0.161903	0.801498	0.898455	0.877694	0.161903	0.161903	0.161903	3.85261	0.47131	1.79303	0.598526	1.01226	0.616285	0.806298	1.02986	0.836533	0.447959	1.15734	2.68263	1.98646	0.161903	0.161903	0.161903	0.233951	2.21848	0.161903	3.34264	0.980767	0.821191	0.603276	0.257643	0.487032	1.08739	1.93945	0.750321	0.161903	0.64338	0.161903
X - 16209			1.36558	1.91607	0.736052	1.59508	1.21897	1.12002	0.868151	1.94201	1.01937	0.794003	1.01647	0.654889	1.25508	0.890196	0.419589	1.0151	0.5161	1.49905	0.989368	1.39772	1.06725	1.17495	0.602936	0.419589	1.03601	1.10324	1.13214	2.03101	0.712881	1.01213	1.4697	0.751064	0.902506	1.0716	1.36919	0.806105	0.871406	1.61339	1.71145	0.826824	1.06854	0.833178	0.62752	0.785753	1.3867	0.728197	0.738542
X - 16252			0.828373	0.609008	0.551603	1.01218	1.03599	0.635728	0.60524	0.241501	0.241501	0.241501	1.53928	2.10156	0.987823	1.62178	2.19739	1.01194	0.622167	0.241501	9.20403	0.714553	1.10365	1.28561	0.241501	0.516288	0.988065	1.92611	1.67687	3.49787	2.52829	0.585709	0.670878	0.241501	0.241501	0.241501	2.41895	0.241501	1.37821	2.59306	1.01593	0.982271	0.640185	0.758864	3.33097	2.38154	0.241501	0.721945	1.58927
X - 16253			0.298364	0.298364	0.298364	0.298364	0.298364	0.298364	0.298364	0.298364	0.298364	0.298364	0.900488	1.95378	0.298364	1	1.07141	0.298364	0.298364	0.298364	6.31427	0.298364	1.06252	0.298364	0.298364	0.298364	0.298364	0.594282	0.841121	1.69077	1.48258	0.298364	0.298364	0.298364	0.298364	0.298364	1.08845	0.298364	1.07425	1.85063	1.05234	0.298364	0.298364	0.298364	0.901768	1	0.298364	0.298364	0.855418
X - 16272			1	1	1	1	1	1	1	1	1	1	1	1	1	1	1	1	1	1	1	1	1	1	1	1	1	1	1	1	1	1	1	1	1	1	1	1	1	1	1	1	1	1	1	1	1	1	1
X - 16292			0.597322	0.597322	0.597322	0.597322	0.597322	0.597322	0.597322	0.597322	0.597322	0.597322	0.597322	0.597322	0.597322	0.597322	0.597322	0.597322	0.597322	0.597322	3.13273	0.597322	1.13038	0.879568	0.597322	0.597322	0.597322	0.597322	0.597322	1.05577	1.58725	0.597322	0.597322	0.597322	0.597322	0.597322	0.597322	0.597322	0.597322	1.09648	1.05713	0.597322	0.597322	0.597322	1.06367	0.597322	1	0.597322	0.850959
X - 16335			0.465677	0.465677	0.465677	0.465677	0.465677	0.465677	0.465677	0.465677	1.63298	1.23477	8.04217	0.889752	1.47595	0.899828	0.465677	0.465677	0.465677	0.465677	0.704575	3.02393	0.465677	2.77494	0.465677	1.05071	0.465677	0.465677	0.751852	0.465677	0.465677	0.62677	0.695259	0.465677	0.465677	0.57465	0.465677	1.0392	2.82465	3.08438	0.465677	0.761988	0.465677	0.816432	1.0896	0.465677	1	0.765225	0.925219
X - 16336			0.161028	0.161028	0.161028	0.161028	0.161028	0.161028	0.161028	0.161028	1	0.161028	0.4101	0.161028	0.161028	0.161028	0.161028	0.161028	0.161028	0.161028	3.46696	0.161028	0.161028	0.161028	0.161028	1.43232	0.83407	0.161028	0.161028	0.161028	1.22878	0.161028	0.161028	1.31882	0.161028	0.58395	0.161028	10.5598	0.161028	0.253744	0.161028	0.161028	0.161028	1.01642	1.16593	0.161028	0.161028	0.161028	1.18061
X - 16368			0.19743	0.19743	0.19743	0.19743	0.19743	0.19743	0.19743	0.19743	0.19743	0.19743	1.94426	0.19743	0.19743	0.19743	0.19743	0.19743	1.6572	0.19743	0.19743	0.19743	0.19743	0.434515	2.3574	0.90954	0.923734	0.19743	0.19743	0.19743	0.308703	0.19743	0.19743	1	0.19743	2.63026	0.19743	1.68622	0.19743	0.19743	0.19743	0.19743	0.19743	1	0.19743	0.19743	0.19743	0.19743	1.6986
X - 16379			0.293342	0.293342	0.293342	0.293342	0.293342	0.293342	0.293342	0.438324	0.293342	0.293342	0.619531	0.293342	0.293342	0.293342	0.293342	0.293342	1.9887	0.293342	0.293342	0.293342	0.293342	1.12399	1	0.966324	0.510436	0.293342	0.293342	0.293342	0.506941	0.293342	0.293342	0.293342	0.293342	1.32218	0.293342	1	0.293342	0.293342	0.293342	0.293342	0.293342	1	0.677818	0.293342	0.293342	0.876353	1.48879
X - 16380			0.515121	0.515121	0.515121	0.515121	0.515121	0.515121	0.515121	0.515121	0.515121	0.515121	0.915038	0.515121	0.515121	0.515121	0.515121	0.515121	1	0.515121	1	0.515121	0.515121	0.792649	0.515121	0.725232	0.515121	0.515121	0.515121	0.515121	2.06468	0.515121	0.515121	0.515121	0.515121	0.515121	0.515121	0.980656	0.515121	0.515121	0.515121	0.515121	1	0.515121	0.515121	0.515121	0.515121	0.515121	0.515121
X - 16468			2.42167	0.653175	0.757847	0.570471	0.533841	1.67363	0.02057	0.02057	3.36616	0.929368	9.87414	1.70163	2.4847	0.786832	0.902998	1.20048	7.22325	1.21487	7.81905	1.82047	2.49676	19.4359	5.82435	12.7028	3.68768	0.103199	1.13812	3.01421	8.07033	0.811585	1.00214	6.72854	1	5.5266	0.706546	26.7581	1.15999	2.13422	0.785704	0.02057	2.57106	9.40465	5.73423	1.32892	1	1.09086	5.03157
X - 16475			0.654887	0.18433	0.746542	0.18433	0.18433	0.882448	0.18433	0.18433	0.18433	0.66966	4.46321	0.18433	0.18433	0.18433	0.692382	0.18433	9.53999	0.18433	3.72495	0.892312	0.18433	3.48968	1.28835	3.76913	0.18433	0.18433	0.689988	1.75261	1.81501	0.18433	0.18433	0.5945	0.18433	1.76889	0.543398	2.19342	0.18433	0.18433	0.18433	0.18433	0.18433	2.09206	1.44377	1.68226	0.18433	0.18433	1
X - 16626			1.36182	0.37109	0.980107	0.48692	1.31384	0.815209	1.73467	2.03793	0.747952	1.77416	2.19793	2.51525	0.892859	0.98014	0.205163	1.21541	1.0555	0.751808	1.33078	1.11098	1.25152	0.396108	1.15339	1.91881	0.875628	1.21807	1.02085	0.862175	0.9952	2.43639	0.897199	0.964834	2.28029	1.4125	0.697706	0.909382	1.44608	0.704713	3.92035	1.86515	0.724568	0.896447	1.90249	0.635659	1.24637	2.93216	0.830271
X - 16693			1.20361	0.692866	1.04447	0.674636	1.16671	1.38458	3.73528	0.420894	1.01081	9.69439	2.57109	2.05324	1.08771	1.40331	2.49295	1.98502	2.87344	1.35925	7.27288	3.40805	2.35638	6.88974	2.63525	3.03701	1.66572	1.48001	1.7394	3.50197	1.98559	0.757627	1.3833	3.17339	1.07854	2.99316	2.05997	1.82934	1.88782	3.7697	0.420894	1.32106	1.47239	1.76788	4.8956	1.81701	0.989187	1.20162	1.60773
X - 16932			0.988301	0.195519	0.68407	1.91952	0.92463	0.697438	0.337264	0.195519	0.846582	1.51279	0.195519	0.195519	1.35829	1.03078	1.03635	0.982392	0.195519	0.673272	1.0117	0.195519	0.428313	1.84174	0.999276	1.76988	1.1387	0.926666	1.01867	0.933915	1.61689	0.195519	0.195519	0.195519	0.563137	2.34109	0.195519	0.195519	0.195519	0.195519	1.34953	0.740076	0.195519	1.08501	0.920717	0.195519	0.195519	0.195519	0.195519
X - 16940			0.240694	0.240694	0.240694	0.240694	0.240694	0.240694	0.240694	0.240694	0.240694	0.240694	0.240694	0.240694	0.240694	0.240694	0.240694	0.240694	0.240694	0.240694	0.240694	0.240694	0.240694	0.240694	0.468041	0.240694	0.240694	0.240694	0.240694	0.734441	0.240694	0.240694	0.240694	0.240694	0.240694	0.240694	0.240694	0.240694	0.240694	0.240694	0.240694	0.240694	0.240694	0.240694	1.61176	1.08827	0.240694	0.240694	0.240694
X - 16947			0.033939	0.033939	0.033939	0.033939	0.033939	0.033939	0.033939	0.033939	0.033939	0.033939	0.033939	0.033939	0.033939	0.033939	0.033939	0.033939	0.033939	0.033939	0.033939	0.033939	0.033939	0.033939	0.033939	0.033939	0.033939	0.033939	0.033939	0.033939	0.033939	0.033939	0.033939	0.033939	0.033939	0.033939	0.033939	0.033939	0.033939	0.033939	0.033939	0.033939	0.033939	0.033939	2.87118	0.033939	0.033939	0.033939	0.033939
X - 16964			1.14716	0.530677	0.465344	0.446776	0.64506	1.10429	1.76187	1.31643	0.883241	0.722089	0.647983	1.30475	0.748948	1.39668	0.568405	1.39016	0.834935	0.865599	1.26192	0.592737	1.04203	0.751801	0.944951	0.819051	0.866671	0.97257	0.896035	0.671829	1.11499	0.464099	0.567329	1.19492	0.964043	0.819764	1.12122	0.446776	0.662014	0.939362	1.04562	1.00346	0.735452	1.01555	0.966151	1.34729	1.07358	0.825185	0.691707
X - 16965			0.300141	1.2169	0.873487	1.72825	6.41306	2.81229	5.87233	1.81566	1.07624	4.13663	0.539614	1.08773	1.98009	1.02177	4.79604	0.663346	0.300141	1.35458	0.775409	2.41886	0.300141	0.526554	0.300141	0.300141	0.300141	0.300141	2.80541	0.659992	0.300141	5.36838	1.39066	0.300141	1.30615	0.300141	1.73915	0.300141	4.06533	2.26517	1.73484	2.72327	1.57529	0.300141	0.649704	0.300141	0.499919	2.23695	0.300141
X - 16975			0.575972	0.575972	0.575972	0.575972	0.575972	0.575972	0.575972	1	0.575972	0.575972	0.575972	0.575972	0.575972	0.575972	0.575972	0.575972	0.575972	0.575972	0.575972	0.575972	0.575972	0.575972	0.575972	0.575972	0.575972	0.575972	0.575972	0.575972	0.575972	0.575972	0.575972	0.575972	0.575972	0.575972	0.575972	0.575972	0.575972	0.575972	0.575972	0.575972	0.575972	0.575972	0.575972	0.575972	0.575972	0.575972	0.575972
X - 16990			0.658243	0.658243	0.658243	0.658243	0.658243	0.658243	0.658243	0.658243	0.658243	0.658243	0.658243	0.658243	0.658243	0.658243	0.658243	0.658243	0.658243	0.658243	0.658243	0.658243	0.658243	0.658243	0.658243	0.658243	0.658243	0.658243	0.658243	0.658243	0.658243	0.658243	0.658243	0.658243	0.658243	0.658243	0.658243	0.658243	0.658243	0.658243	0.658243	0.658243	0.658243	0.658243	0.658243	0.658243	0.658243	0.658243	0.658243
X - 17010			0.323468	0.323468	0.323468	0.323468	0.323468	0.323468	0.323468	0.323468	0.323468	0.323468	0.323468	0.323468	0.323468	0.323468	0.323468	0.323468	0.323468	0.323468	0.323468	0.860884	0.323468	0.323468	0.596477	0.323468	0.323468	0.323468	0.323468	0.323468	0.86853	0.323468	0.323468	0.323468	0.323468	0.323468	0.323468	0.323468	1	0.323468	0.323468	0.323468	0.323468	0.323468	0.323468	0.323468	0.323468	0.323468	0.323468
X - 17080			0.38323	0.988159	0.38323	0.38323	0.38323	0.38323	1.35867	0.564288	0.38323	0.38323	0.746773	0.38323	0.38323	0.530969	0.38323	0.38323	1.53854	0.38323	0.38323	1.10238	0.855464	0.38323	0.574169	1.01476	1.3567	0.457049	0.38323	1	2.30795	0.38323	0.38323	0.65695	0.827345	2.16771	1.81965	1.04859	0.38323	1.71516	0.895435	0.38323	0.711124	1.52423	1.23741	1.11572	1.0492	0.38323	1.44953
X - 17092			0.376031	0.183157	0.183157	0.183157	0.183157	0.183157	0.183157	0.183157	0.183157	0.183157	0.605194	0.183157	0.183157	0.183157	0.183157	0.183157	0.723486	0.183157	1.11137	0.183157	0.183157	0.183157	0.183157	0.183157	0.183157	0.183157	0.388094	0.683859	0.538062	0.183157	0.183157	0.183157	0.183157	0.470547	0.183157	0.183157	0.183157	0.183157	0.183157	0.183157	0.183157	0.183157	0.465367	0.183157	0.248056	0.183157	0.251311
X - 17101			0.331983	0.331983	0.331983	0.331983	0.331983	0.331983	0.331983	1	0.331983	0.331983	1.975	1.00145	0.598869	0.783575	0.331983	0.331983	0.331983	0.899464	3.50451	2.05074	0.331983	2.2616	0.331983	0.331983	0.331983	0.331983	4.56954	0.945987	0.331983	0.331983	0.331983	0.494019	0.331983	1.10777	0.331983	0.331983	0.77394	5.684	0.78093	0.331983	0.331983	1.16558	0.875367	0.331983	0.331983	0.793926	0.526369
X - 17114			0.043903	0.043903	0.043903	0.043903	0.043903	0.043903	0.043903	0.043903	0.043903	0.043903	0.043903	0.043903	0.043903	0.043903	0.043903	0.043903	0.043903	0.043903	0.043903	0.043903	0.043903	0.043903	0.043903	0.043903	0.043903	0.043903	0.043903	0.043903	0.043903	0.043903	0.043903	0.043903	0.043903	0.043903	0.043903	0.043903	0.043903	0.043903	0.043903	0.043903	0.043903	0.043903	0.043903	0.043903	0.043903	0.043903	0.043903
X - 17115			0.295753	0.19833	0.19833	0.339773	0.524614	0.467898	0.19833	0.19833	0.19833	0.230023	0.949285	0.19833	0.346803	0.19833	0.19833	0.19833	0.19833	0.19833	0.910389	0.19833	0.19833	0.611184	0.562097	0.705069	0.19833	0.19833	0.19833	0.719465	0.555208	0.19833	0.260887	0.647925	0.19833	0.19833	0.19833	0.19833	0.63428	0.414891	0.19833	0.40682	0.19833	0.615674	0.19833	0.19833	0.19833	0.43734	0.62738
X - 17137			0.901212	0.041408	0.814098	1.72726	0.041408	1.03894	1.1756	0.041408	0.041408	1.63395	0.041408	0.041408	1.35549	0.041408	1.05843	0.041408	0.041408	0.041408	0.041408	0.041408	0.041408	1.18842	0.041408	0.041408	0.041408	0.692473	0.041408	1.55816	0.041408	0.041408	0.041408	0.041408	0.961057	0.041408	0.041408	0.041408	0.041408	0.041408	0.041408	0.950156	0.041408	0.041408	0.041408	0.041408	0.041408	0.790794	0.041408
X - 17147			0.243518	0.243518	0.243518	0.243518	0.243518	0.243518	0.243518	0.243518	0.243518	0.243518	0.243518	0.243518	0.243518	0.243518	0.243518	0.243518	0.243518	0.243518	0.243518	0.243518	0.243518	0.243518	1.11688	0.243518	0.862714	0.243518	0.243518	1	0.243518	0.243518	0.243518	0.243518	0.243518	0.243518	0.243518	0.243518	0.243518	0.243518	0.243518	0.243518	0.243518	0.243518	0.243518	0.243518	0.243518	0.243518	0.243518
X - 17246			0.737065	0.314517	0.314517	0.314517	0.314517	0.314517	0.314517	0.314517	0.314517	0.539674	1.67764	0.314517	0.314517	0.314517	0.314517	0.314517	1.36581	0.314517	1.48278	0.314517	0.564583	0.314517	0.314517	0.65899	0.314517	0.314517	0.652603	0.314517	0.454625	0.314517	0.314517	0.314517	0.314517	1.71384	0.314517	0.672259	0.314517	0.797647	0.545405	0.314517	0.314517	0.314517	0.935695	0.314517	0.314517	0.518146	0.406305
X - 17254			0.345429	0.050539	0.050539	0.744365	0.050539	0.364457	0.050539	5.72911	0.63672	0.050539	0.050539	9.46095	0.050539	0.050539	0.050539	1.13843	0.388457	1.00152	0.274439	0.050539	0.050539	0.665193	0.050539	1.18036	0.278057	0.307293	2.39871	0.050539	0.050539	0.050539	0.050539	8.98819	1.13956	0.194677	1.02633	0.237219	0.050539	0.050539	0.050539	0.050539	0.050539	0.050539	0.050539	1.9387	0.937809	12.0071	0.050539
X - 17299			0.467101	0.557928	0.248871	0.908513	1.12039	0.406468	0.398555	0.768545	0.701594	0.602736	0.834883	0.656926	0.536396	0.82484	0.655051	0.548104	0.585529	0.775939	0.936133	0.462783	0.61016	0.47663	0.828314	0.601228	0.606219	0.636127	0.756466	0.647234	0.693586	1.16561	0.711481	0.769435	0.637526	0.885024	0.760703	0.521474	0.999068	0.734896	0.760169	0.883775	0.805224	0.489824	0.572884	0.248871	0.755353	0.555907	0.359434
X - 17306			0.240375	0.240375	0.240375	0.240375	0.420881	0.240375	0.240375	0.240375	0.240375	0.240375	1.40738	0.240375	0.240375	0.240375	0.524961	0.240375	4.31708	1.10978	0.240375	0.240375	0.240375	1.34766	0.240375	1.32665	0.240375	0.369301	0.240375	0.240375	0.240375	0.240375	4.37303	0.240375	0.443495	0.240375	1	0.955314	0.240375	0.240375	1.24148	0.240375	1.39727	0.240375	1.41743	2.59756	0.240375	0.240375	0.790413
X - 17327			0.187677	0.187677	0.187677	0.313435	0.187677	0.781586	0.187677	0.187677	0.187677	0.187677	0.187677	0.187677	0.187677	0.187677	0.187677	0.187677	0.187677	0.187677	0.187677	0.187677	0.187677	0.187677	0.751715	0.187677	0.187677	0.34175	0.187677	0.363098	0.187677	0.187677	0.187677	0.187677	0.187677	0.187677	0.187677	0.187677	0.187677	0.187677	0.256712	0.187677	0.187677	0.187677	0.187677	0.187677	0.187677	0.390739	0.254076
X - 17341			0.260954	0.260954	0.260954	0.893055	0.260954	0.260954	0.260954	0.260954	0.260954	0.260954	0.260954	0.260954	0.458995	0.260954	0.260954	0.260954	0.260954	0.260954	0.260954	0.260954	0.260954	0.260954	0.260954	0.260954	0.260954	0.260954	0.260954	0.46057	0.260954	0.260954	0.921043	0.260954	0.260954	0.55703	0.260954	0.260954	0.260954	0.500328	0.260954	0.260954	0.260954	0.260954	0.260954	0.260954	0.260954	0.260954	0.260954
X - 17350			1	1	1	1	1	1	1	1	1	1	1	1	1	1	1	1	1	1	1	1	1	1	1	1	1	1	1	1	1	1	1	1	1	1	1	1	1	1	1	1	1	1	1	1	1	1	1
X - 17351			0.351303	0.351303	0.351303	0.351303	0.351303	0.351303	0.351303	0.351303	0.351303	0.351303	0.351303	0.351303	0.351303	0.351303	0.351303	0.351303	0.351303	0.351303	0.351303	0.351303	0.351303	0.351303	0.351303	0.351303	0.351303	0.351303	0.351303	0.351303	0.351303	0.351303	0.351303	0.351303	0.351303	0.351303	0.994928	0.351303	0.351303	0.351303	0.351303	0.351303	0.351303	0.351303	0.351303	0.351303	0.351303	0.351303	0.351303
X - 17352			1	1	1	1	1	1	1	1	1	1	1	1	1	1	1	1	1	1	1	1	1	1	1	1	1	1	1	1	1	1	1	1	1	1	1	1	1	1	1	1	1	1	1	1	1	1	1
X - 17355			0.301257	0.301257	0.301257	0.301257	0.301257	0.301257	0.301257	0.301257	0.301257	0.301257	0.301257	0.301257	0.301257	0.301257	0.301257	0.301257	0.301257	0.301257	0.301257	0.301257	0.301257	0.301257	0.301257	0.301257	0.301257	0.301257	0.301257	0.301257	0.301257	0.301257	0.301257	0.301257	0.301257	0.301257	0.301257	0.301257	0.301257	0.301257	0.301257	0.301257	0.301257	0.301257	0.301257	0.301257	0.301257	0.301257	0.301257
X - 17393			0.45148	0.45148	0.45148	0.45148	0.45148	0.45148	0.45148	0.45148	0.45148	0.45148	0.45148	0.45148	0.45148	0.45148	0.45148	0.45148	0.45148	0.45148	0.45148	0.45148	0.45148	0.45148	0.45148	0.45148	0.45148	0.45148	0.45148	0.45148	0.45148	0.45148	0.45148	0.45148	0.45148	0.45148	0.45148	0.45148	0.45148	0.45148	0.45148	0.45148	0.45148	0.45148	0.45148	0.45148	0.45148	0.45148	0.45148
X - 17462			0.210242	0.210242	0.210242	0.210242	0.210242	0.210242	0.907414	0.210242	0.210242	0.210242	0.210242	0.210242	0.210242	0.210242	0.210242	0.210242	0.210242	0.210242	0.210242	0.210242	0.210242	0.210242	0.210242	0.210242	0.210242	0.210242	0.210242	0.210242	0.210242	0.210242	0.210242	0.210242	0.210242	0.210242	0.210242	0.210242	1.63484	1.07056	0.210242	0.210242	0.210242	0.210242	0.210242	0.210242	0.210242	0.210242	1.13503
X - 17501			0.10893	0.10893	0.10893	0.10893	0.10893	0.656586	0.10893	0.10893	0.10893	0.10893	0.10893	0.10893	0.10893	0.10893	0.10893	0.10893	0.10893	0.10893	0.10893	0.558743	0.10893	0.10893	0.10893	0.10893	0.10893	0.10893	0.10893	0.10893	0.10893	0.10893	0.10893	0.10893	0.10893	0.10893	0.10893	0.10893	0.10893	0.10893	0.10893	0.10893	0.10893	0.10893	0.10893	0.10893	0.10893	0.10893	0.10893
X - 17553			1.88434	2.45681	4.14308	0.350539	0.350539	0.350539	2.16361	0.350539	0.350539	0.904826	1.68211	0.350539	1.13446	1.23771	0.350539	1.2311	0.916474	0.350539	1	3.48632	0.350539	0.350539	1.28016	0.350539	1.50534	1.37925	1.34497	0.982854	1.50681	1.01854	0.350539	1.11378	0.350539	1.08299	0.350539	0.350539	0.350539	0.350539	1.45229	0.350539	0.87486	1	0.97319	0.350539	0.659584	0.958735	1.31506
X - 17642			0.528799	0.528799	0.528799	0.528799	0.528799	0.528799	1.01397	0.528799	0.528799	0.528799	0.528799	0.528799	0.528799	0.528799	0.528799	0.528799	0.965622	0.528799	0.528799	1.32191	0.528799	0.528799	0.528799	0.528799	0.528799	0.528799	0.528799	0.528799	1.59074	0.528799	0.528799	0.528799	0.528799	1.15291	1.6863	0.528799	0.528799	1.93202	0.528799	0.528799	0.528799	0.528799	0.528799	0.740722	0.528799	0.528799	1.52894
X - 17692			0.220991	0.220991	0.220991	0.220991	0.220991	0.220991	0.220991	0.220991	0.220991	0.220991	0.220991	0.220991	0.220991	0.220991	0.220991	0.220991	0.220991	0.220991	0.220991	0.220991	0.220991	0.220991	0.220991	0.220991	0.220991	0.220991	0.220991	0.220991	0.220991	0.220991	0.220991	0.220991	0.220991	0.220991	0.220991	0.220991	0.220991	0.220991	0.220991	0.220991	0.220991	0.220991	0.220991	0.220991	0.220991	0.220991	0.220991
X - 17706			0.382477	0.382477	0.382477	0.382477	0.382477	0.382477	0.382477	0.382477	0.382477	0.382477	0.382477	0.382477	0.382477	0.382477	0.382477	0.382477	0.382477	0.382477	0.382477	0.382477	0.382477	0.382477	0.382477	0.382477	0.382477	0.382477	0.382477	0.382477	0.382477	0.382477	0.382477	0.382477	0.382477	0.382477	0.382477	0.382477	0.382477	0.382477	0.382477	0.382477	0.382477	0.382477	0.382477	0.382477	0.382477	0.382477	0.382477
X - 18111			1.31734	1.07433	1.05208	0.8602	0.606221	1.44326	1.30676	2.40939	1.14437	0.613915	1.80812	1.14035	1.30181	1.37455	0.695652	1.01192	1.02993	1.47233	1.17288	1.26454	1.06373	0.956934	1.89905	1.15638	0.884497	1.58401	1.47561	1.10809	0.693748	0.830924	1.0117	0.31341	1.0201	0.916621	0.292206	0.997506	0.866535	1.04114	1.06825	0.866388	1.31828	1.12937	0.58877	0.294625	1.13674	1.11925	0.188387
X - 18113			1.21753	0.952727	0.991246	0.688599	0.867046	1.09865	1.67998	2.55037	1.11865	0.801091	1.95699	1.20799	1.34719	1.41139	0.80343	1.05094	1.35138	1.53257	1.09302	1.09172	1.29148	0.986119	1.69807	1.31589	0.794716	1.62958	1.4217	1.10525	0.995034	1.00875	1.07714	0.306739	0.802125	0.842905	0.404537	0.804414	0.821186	1.23912	1.03326	1.14227	1.3443	1.09605	0.608722	0.516371	1.29584	1.22488	0.16258
X - 18162			0.294081	0.294081	0.294081	0.294081	0.294081	0.294081	0.294081	0.294081	0.294081	0.294081	2.99511	0.294081	0.294081	0.294081	0.294081	0.294081	0.294081	0.294081	1.00256	0.618611	0.294081	0.877637	0.294081	1	0.294081	0.294081	0.294081	0.294081	1.40109	0.294081	0.294081	0.599877	0.294081	1.62283	0.294081	1.59859	0.294081	0.529258	0.294081	0.294081	0.294081	0.645803	1.08388	0.294081	0.294081	0.294081	1.31588
X - 18165			0.351668	0.351668	0.351668	0.351668	0.351668	1	0.351668	0.351668	0.578824	0.351668	3.17441	1.93646	0.351668	0.351668	0.351668	0.351668	1	0.351668	1.26412	0.714005	0.912411	1.24432	0.351668	1.85256	0.746133	0.351668	1	0.672071	1.27949	0.351668	0.351668	0.819998	0.351668	1.39763	0.351668	1.60926	0.351668	1.05514	0.351668	0.351668	0.351668	1.20495	0.98749	0.351668	0.440727	0.351668	1.74848
X - 18179			0.448857	0.035508	0.380673	0.035508	0.21205	1.03785	0.247754	0.035508	3.08344	0.833523	8.25913	1.13477	1.3629	0.647572	0.408116	0.320116	12.0294	1.01077	1.4048	1.06231	0.571735	3.41158	1.83626	3.89916	0.952361	0.073579	1.0446	1.24983	1.14087	0.035508	0.373132	1.6707	0.525321	2.3316	0.443009	9.27266	0.537347	1.1558	0.377229	0.035508	1.09324	3.21794	1.947	1.75021	0.989228	1.0016	1.61112
X - 18218			0.727762	0.727762	0.727762	0.727762	0.727762	0.727762	0.727762	0.727762	0.727762	0.727762	0.727762	0.727762	0.727762	0.727762	0.727762	0.727762	0.727762	0.867331	0.727762	1	0.727762	0.727762	0.727762	0.727762	0.727762	0.727762	0.727762	0.727762	0.727762	0.727762	0.727762	0.727762	0.727762	0.727762	0.727762	0.727762	0.727762	0.727762	0.727762	0.727762	0.727762	0.727762	0.727762	0.727762	0.727762	1	0.727762
X - 18307			0.870915	1.58225	1.03552	0.821762	0.620019	0.973409	1.70519	2.03485	1.59401	0.307726	1.44277	0.529081	1.63061	0.712533	1.80567	0.848147	3.14567	1.37891	0.783605	0.981711	1.28506	1.93964	0.906331	0.889633	1	0.658585	1.38262	0.660561	0.118855	0.292936	0.760889	0.118855	0.534043	0.532881	0.118855	0.802262	0.426126	1.31886	0.702972	0.657174	1.26795	1.45557	0.501609	0.118855	0.919179	0.60077	0.118855
X - 18309			1.28402	1.09278	1.26032	0.957027	0.000856	1.126	1.30245	1.71669	1.23504	0.79763	1.84583	1.02581	1.45058	1.17213	0.632046	1.09171	1.05951	1.45873	1.00597	1.48428	1.24023	0.704229	1.52807	1.19089	0.89594	1.26512	1.6046	0.000856	0.932713	0.85261	1.12074	0.39524	0.969624	0.868904	0.422908	1.00775	1.15736	1.19271	1.24643	1.15087	1.11909	1.23644	0.000856	0.701642	1.10586	1.13119	0.220765
X - 18330			0.155057	0.155057	0.341519	0.155057	0.372472	0.582719	0.155057	0.155057	1.09316	0.155057	3.12176	0.97492	0.416214	0.155057	0.297392	0.425153	4.22731	0.455516	2.17887	0.522874	0.483993	2.38688	1.25449	3.34914	1	0.264294	0.527733	0.155057	1.16424	0.155057	0.22686	1.07823	0.310766	1.58075	1.11298	3.66141	0.155057	0.374355	0.675001	0.155057	0.672229	2.79011	0.966195	2.17186	0.763016	0.155057	0.996271
X - 18331			0.523634	1.46036	0.084597	0.084597	0.330124	1.38664	0.084597	0.084597	1.2491	0.944384	5.01714	0.694874	1.2471	0.45296	0.638707	0.504789	10.889	1.01341	1.42767	1.09482	0.520241	2.83021	2.95948	2.44178	1.02834	0.084597	0.084597	1.32177	1.94793	0.084597	0.084597	1.2624	0.378008	4.15383	0.305403	5.97734	1.06861	1.12527	0.084597	0.084597	1.20571	2.00194	0.978719	0.992397	0.589284	1.00874	0.982106
X - 18332			1.65522	0.686743	0.707761	0.421098	0.36885	1.90759	0.206407	0.023907	5.68899	0.787366	12.2882	1.32542	2.68667	0.438449	0.44671	0.679221	7.71611	1.73272	6.0308	1.84968	1.87658	17.3171	6.59105	11.5136	4.01925	0.089145	1.03591	2.00585	7.76019	0.023907	0.741273	5.23761	0.603126	6.44372	0.578002	32.5888	0.586768	1.69392	0.389856	0.023907	2.11073	8.99792	4.54257	1.69523	0.771195	0.769769	5.34413
X - 18333			1.01151	0.083019	0.700981	0.461518	0.083019	0.938772	0.083019	0.083019	3.38944	0.083019	4.51729	0.565509	0.649979	0.083019	0.083019	0.083019	7.38728	1	4.80478	1.42889	1.03103	6.24859	2.52649	7.29664	0.823114	0.169593	0.470387	1.94384	2.54724	0.083019	0.083019	1.81728	0.372454	1.40899	0.880759	12.9277	0.083019	1.50137	0.083019	0.083019	0.598287	4.85747	1.05577	1.69451	0.083019	0.083019	3.06267
X - 18341			0.344285	0.344285	0.344285	0.344285	0.344285	0.344285	0.344285	0.344285	0.344285	0.344285	1.97936	0.344285	0.344285	0.344285	0.344285	0.344285	0.953493	0.344285	0.344285	0.344285	0.559472	1.15673	0.344285	0.344285	0.344285	0.344285	0.344285	0.344285	0.85976	0.344285	0.344285	0.728519	0.344285	1.01805	0.344285	1.12516	0.344285	0.636711	0.344285	0.344285	0.344285	1	1.15232	0.344285	0.344285	0.344285	1.30449
X - 18513			0.005626	0.005626	0.005626	0.005626	0.005626	0.005626	0.005626	0.005626	0.005626	0.005626	0.005626	0.005626	0.005626	0.005626	0.005626	0.005626	0.005626	0.005626	0.005626	0.005626	0.005626	3.35781	0.005626	0.005626	0.005626	0.005626	0.005626	0.005626	0.005626	0.005626	0.015493	0.005626	0.005626	0.005626	0.005626	0.005626	0.005626	0.358267	0.005626	0.070204	0.005626	0.005626	0.005626	0.005626	0.005626	0.005626	0.005626
X - 18554			0.629018	1.35357	1.21907	0.951881	0.531322	0.693067	1.61962	1.77077	1.34102	0.346161	2.02164	0.510453	1.27739	0.840762	1.59414	0.219847	0.219847	1.16965	0.566632	1	1.3653	1.21369	0.57899	0.610666	0.862172	0.812102	1.01358	0.575979	0.604056	0.337548	0.650222	0.219847	0.848897	0.460323	0.696854	0.345348	0.432	1.23588	0.860332	0.773365	1.00132	0.79827	0.559838	0.42035	0.743962	0.553597	0.320937
X - 18772			1.69585	0.723437	1.02331	1.08945	0.860959	0.925915	0.531206	1.60686	0.839665	1.90177	1.11633	0.944546	1.57296	1.12411	0.379591	0.471129	1.53994	0.379591	1.10501	1.65042	1.67271	2.15632	0.91031	1.61158	0.955411	0.938818	1.16946	3.05954	1.31613	1.00932	0.856111	0.829632	0.379591	1.81554	1.00029	1.05505	4.37914	1.30427	1.76863	0.860103	0.996225	1.67474	1.85553	1.11671	1.38183	1.13603	0.944415
X - 18798			0.681548	0.191021	0.191021	0.191021	0.942395	0.5958	0.998432	1.35211	0.191021	0.191021	0.191021	1.62246	0.191021	0.793545	0.191021	1.15094	0.191021	0.191021	1.57999	0.191021	0.854274	0.191021	1.14295	0.191021	1.3839	1.24994	1	1.1909	1.00793	1.26939	0.191021	1.66654	0.191021	0.191021	0.191021	0.191021	0.191021	0.389922	0.191021	0.191021	0.191021	0.191021	0.191021	0.191021	0.191021	0.191021	0.191021
X - 18800			0.156308	0.156308	0.156308	0.156308	0.156308	0.156308	0.156308	0.156308	0.863421	0.156308	1.20799	0.156308	0.156308	0.156308	0.156308	0.156308	3.41813	0.156308	0.978143	0.443993	0.156308	2.37461	0.156308	2.23332	0.674406	0.156308	0.156308	0.156308	0.156308	0.156308	0.156308	0.902838	0.156308	0.931142	0.156308	1.91772	0.156308	0.156308	0.156308	0.156308	0.156308	0.868173	1.02171	0.852602	0.156308	0.156308	1.19309
X - 18808			0.977697	2.66379	1.12955	3.38172	0.934264	1.31397	0.934871	1.43677	2.24709	0.365014	1.41167	0.960721	1.11402	1.4174	2.09255	1.05061	0.773728	1.72718	0.669324	0.914364	0.766556	2.95054	0.738557	0.601696	0.802205	0.98219	0.973011	0.564279	0.568896	0.799624	0.813762	0.363388	0.949971	1.54509	0.428545	0.585238	1.26925	0.700581	1.2479	0.721263	0.715346	0.698653	0.511904	0.337071	0.72217	0.4059	0.287936
X - 18843			0.235091	0.235091	0.235091	0.235091	0.235091	0.235091	0.235091	0.235091	0.235091	0.235091	1.69048	0.235091	0.235091	0.729937	0.235091	1.06631	2.46801	0.235091	1.15813	0.235091	1.01982	1.02631	1.39255	2.07909	0.939418	0.720408	0.235091	1.27533	2.25617	0.235091	0.235091	1.82585	0.949331	1.96272	0.848458	0.961889	0.235091	0.781443	1.04632	0.235091	0.235091	1.99001	0.975547	1.00669	0.60719	0.235091	1.93812
X - 18883			1.00754	3.96642	2.50391	2.65251	0.700695	1.38732	1.56823	3.87169	2.49142	0.279783	1.45727	0.746055	1.70112	1.33771	2.12769	0.74278	0.994251	2.22385	0.591628	1.35157	1.15377	2.71188	0.942033	0.745991	0.960573	0.965773	1.51213	0.650781	0.832137	0.695575	1.26898	0.20388	0.555416	0.97555	0.409592	0.660884	0.796206	1.04506	0.915056	0.707014	1.02472	0.774974	0.2854	0.475701	0.975877	0.44854	0.105173
X - 18889			0.221566	0.221566	0.221566	0.221566	0.221566	0.221566	0.221566	0.221566	0.221566	0.221566	4.62192	0.536262	0.221566	0.456261	0.221566	0.221566	2.83989	0.221566	2.1783	0.221566	0.415369	2.0517	0.456523	1.19263	0.35443	0.221566	0.221566	1.13699	1.37244	0.221566	0.221566	0.791964	0.221566	3.13458	0.221566	2.09782	0.668322	0.41474	0.320969	0.221566	0.398293	1.32953	1.96963	0.221566	0.221566	0.221566	1.55974
[truncated: 233 more columns]

## Sheet: RC12Info
	rc12.tissue.3.length.rc12.tissue..1..	CCPAP
3	TUMOR	FALSE
5	TUMOR	FALSE
7	TUMOR	FALSE
9	TUMOR	FALSE
23	TUMOR	FALSE
27	TUMOR	FALSE
29	TUMOR	FALSE
31	TUMOR	FALSE
33	TUMOR	FALSE
37	TUMOR	FALSE
45	TUMOR	FALSE
53	TUMOR	FALSE
55	TUMOR	FALSE
57	TUMOR	FALSE
59	TUMOR	FALSE
61	TUMOR	FALSE
63	TUMOR	FALSE
65	TUMOR	FALSE
69	TUMOR	FALSE
71	TUMOR	FALSE
73	TUMOR	FALSE
75	TUMOR	FALSE
79	TUMOR	FALSE
81	TUMOR	FALSE
83	TUMOR	FALSE
85	TUMOR	FALSE
87	TUMOR	FALSE
91	TUMOR	FALSE
93	TUMOR	FALSE
95	TUMOR	FALSE
97	TUMOR	FALSE
105	TUMOR	FALSE
109	TUMOR	FALSE
113	TUMOR	FALSE
123	TUMOR	FALSE
133	TUMOR	FALSE
137	TUMOR	FALSE
143	TUMOR	FALSE
147	TUMOR	FALSE
155	TUMOR	FALSE
159	TUMOR	TRUE
161	TUMOR	FALSE
165	TUMOR	FALSE
171	TUMOR	FALSE
175	TUMOR	FALSE
181	TUMOR	FALSE
183	TUMOR	FALSE
185	TUMOR	FALSE
187	TUMOR	FALSE
189	TUMOR	FALSE
193	TUMOR	FALSE
218	TUMOR	FALSE
220	TUMOR	FALSE
222	TUMOR	FALSE
224	TUMOR	FALSE
228	TUMOR	FALSE
230	TUMOR	FALSE
232	TUMOR	FALSE
234	TUMOR	FALSE
236	TUMOR	FALSE
238	TUMOR	FALSE
240	TUMOR	FALSE
242	TUMOR	FALSE
244	TUMOR	FALSE
246	TUMOR	FALSE
248	TUMOR	FALSE
250	TUMOR	FALSE
252	TUMOR	FALSE
254	TUMOR	FALSE
256	TUMOR	FALSE
258	TUMOR	FALSE
260	TUMOR	FALSE
262	TUMOR	FALSE
266	TUMOR	FALSE
268	TUMOR	FALSE
270	TUMOR	FALSE
272	TUMOR	FALSE
274	TUMOR	FALSE
276	TUMOR	FALSE
278	TUMOR	FALSE
280	TUMOR	FALSE
282	TUMOR	FALSE
284	TUMOR	TRUE
286	TUMOR	FALSE
288	TUMOR	FALSE
290	TUMOR	FALSE
292	TUMOR	FALSE
294	TUMOR	FALSE
296	TUMOR	FALSE
298	TUMOR	FALSE
300	TUMOR	FALSE
302	TUMOR	FALSE
304	TUMOR	FALSE
306	TUMOR	FALSE
308	TUMOR	FALSE
310	TUMOR	FALSE
312	TUMOR	FALSE
316	TUMOR	FALSE
318	TUMOR	FALSE
320	TUMOR	FALSE
324	TUMOR	FALSE
326	TUMOR	FALSE
328	TUMOR	FALSE
330	TUMOR	FALSE
332	TUMOR	FALSE
334	TUMOR	FALSE
336	TUMOR	FALSE
338	TUMOR	FALSE
340	TUMOR	FALSE
342	TUMOR	FALSE
344	TUMOR	FALSE
346	TUMOR	FALSE
348	TUMOR	FALSE
350	TUMOR	FALSE
352	TUMOR	FALSE
354	TUMOR	FALSE
356	TUMOR	FALSE
358	TUMOR	FALSE
360	TUMOR	FALSE
362	TUMOR	FALSE
364	TUMOR	FALSE
366	TUMOR	FALSE
370	TUMOR	FALSE
372	TUMOR	FALSE
374	TUMOR	FALSE
376	TUMOR	FALSE
378	TUMOR	FALSE
380	TUMOR	FALSE
382	TUMOR	FALSE
384	TUMOR	FALSE
386	TUMOR	FALSE
388	TUMOR	FALSE
390	TUMOR	FALSE
392	TUMOR	FALSE
394	TUMOR	FALSE
398	TUMOR	FALSE
400	TUMOR	FALSE
402	TUMOR	FALSE
404	TUMOR	FALSE
406	TUMOR	FALSE
4	NORMAL	FALSE
6	NORMAL	FALSE
8	NORMAL	FALSE
10	NORMAL	FALSE
24	NORMAL	FALSE
28	NORMAL	FALSE
30	NORMAL	FALSE
32	NORMAL	FALSE
34	NORMAL	FALSE
38	NORMAL	FALSE
46	NORMAL	FALSE
54	NORMAL	FALSE
56	NORMAL	FALSE
58	NORMAL	FALSE
60	NORMAL	FALSE
62	NORMAL	FALSE
64	NORMAL	FALSE
66	NORMAL	FALSE
70	NORMAL	FALSE
72	NORMAL	FALSE
74	NORMAL	FALSE
76	NORMAL	FALSE
80	NORMAL	FALSE
82	NORMAL	FALSE
84	NORMAL	FALSE
86	NORMAL	FALSE
88	NORMAL	FALSE
92	NORMAL	FALSE
94	NORMAL	FALSE
96	NORMAL	FALSE
98	NORMAL	FALSE
106	NORMAL	FALSE
110	NORMAL	FALSE
114	NORMAL	FALSE
124	NORMAL	FALSE
134	NORMAL	FALSE
138	NORMAL	FALSE
144	NORMAL	FALSE
148	NORMAL	FALSE
156	NORMAL	FALSE
160	NORMAL	TRUE
162	NORMAL	FALSE
166	NORMAL	FALSE
172	NORMAL	FALSE
176	NORMAL	FALSE
182	NORMAL	FALSE
184	NORMAL	FALSE
186	NORMAL	FALSE
188	NORMAL	FALSE
190	NORMAL	FALSE
194	NORMAL	FALSE
219	NORMAL	FALSE
221	NORMAL	FALSE
223	NORMAL	FALSE
225	NORMAL	FALSE
229	NORMAL	FALSE
231	NORMAL	FALSE
233	NORMAL	FALSE
235	NORMAL	FALSE
237	NORMAL	FALSE
239	NORMAL	FALSE
241	NORMAL	FALSE
243	NORMAL	FALSE
245	NORMAL	FALSE
247	NORMAL	FALSE
249	NORMAL	FALSE
251	NORMAL	FALSE
253	NORMAL	FALSE
255	NORMAL	FALSE
257	NORMAL	FALSE
259	NORMAL	FALSE
261	NORMAL	FALSE
263	NORMAL	FALSE
267	NORMAL	FALSE
269	NORMAL	FALSE
271	NORMAL	FALSE
273	NORMAL	FALSE
275	NORMAL	FALSE
277	NORMAL	FALSE
279	NORMAL	FALSE
281	NORMAL	FALSE
283	NORMAL	FALSE
285	NORMAL	TRUE
287	NORMAL	FALSE
289	NORMAL	FALSE
291	NORMAL	FALSE
293	NORMAL	FALSE
295	NORMAL	FALSE
297	NORMAL	FALSE
299	NORMAL	FALSE
301	NORMAL	FALSE
303	NORMAL	FALSE
305	NORMAL	FALSE
307	NORMAL	FALSE
309	NORMAL	FALSE
311	NORMAL	FALSE
313	NORMAL	FALSE
317	NORMAL	FALSE
319	NORMAL	FALSE
321	NORMAL	FALSE
325	NORMAL	FALSE
327	NORMAL	FALSE
329	NORMAL	FALSE
331	NORMAL	FALSE
333	NORMAL	FALSE
335	NORMAL	FALSE
337	NORMAL	FALSE
339	NORMAL	FALSE
341	NORMAL	FALSE
343	NORMAL	FALSE
345	NORMAL	FALSE
347	NORMAL	FALSE
349	NORMAL	FALSE
351	NORMAL	FALSE
353	NORMAL	FALSE
355	NORMAL	FALSE
357	NORMAL	FALSE
359	NORMAL	FALSE
361	NORMAL	FALSE
363	NORMAL	FALSE
365	NORMAL	FALSE
367	NORMAL	FALSE
371	NORMAL	FALSE
373	NORMAL	FALSE
375	NORMAL	FALSE
377	NORMAL	FALSE
379	NORMAL	FALSE
381	NORMAL	FALSE
383	NORMAL	FALSE
385	NORMAL	FALSE
387	NORMAL	FALSE
389	NORMAL	FALSE
391	NORMAL	FALSE
393	NORMAL	FALSE
395	NORMAL	FALSE
399	NORMAL	FALSE
401	NORMAL	FALSE
403	NORMAL	FALSE
405	NORMAL	FALSE
407	NORMAL	FALSE
