# Supplementary material for: Abnormal oxidative metabolism in a quiet genomic background underlies clear cell papillary renal cell carcinoma
Source: eLife. 2019 Apr 1;8:e38986. doi: 10.7554/eLife.38986 (PMC6459676; doi:10.7554/eLife.38986)
Supplement: Figure 2—source data 1. [file elife-38986-fig2-data1.xlsx]

## Sheet: CCPAPvsNormal
	FC	P	PAdj	PseudoMedian	Lower95CI_PseudoMedian	Upper95CI_PseudoMedian
1-arachidonoylglycerophosphoethanolamine*	-3.19445	2.16502e-05	0.000653326	-1.7	-2.43	-1.11
1-oleoylglycerophosphocholine (18:1)	-3.50579	2.16502e-05	0.000653326	-3.645	-5.29	-2.86
1-oleoylglycerophosphoethanolamine	-6.69593	2.16502e-05	0.000653326	-24.855	-28.66	-17.25
1-oleoylplasmenylethanolamine*	-4.65813	2.16502e-05	0.000653326	-6.575	-9.83	-3.81
1-palmitoylglycerophosphocholine (16:0)	-3.41917	2.16502e-05	0.000653326	-5.885	-6.93	-2.89
1-palmitoylglycerophosphoethanolamine	-6.76196	2.16502e-05	0.000653326	-50.575	-61.48	-30.24
1-stearoylglycerophosphoinositol	-4.2976	2.16502e-05	0.000653326	-4.205	-5.42	-3.25
2-methylbutyrylcarnitine (C5)	-2.32237	2.16502e-05	0.000653326	-2.61	-3.98	-1.97
2-palmitoylglycerophosphocholine*	-3.41653	2.16502e-05	0.000653326	-4.155	-5.15	-1.83
alanine	-1.42394	2.16502e-05	0.000653326	-0.77	-1.11	-0.5
arachidonate (20:4n6)	-3.38055	2.16502e-05	0.000653326	-3.29	-4.23	-1.92
cis-vaccenate (18:1n7)	-2.77169	2.16502e-05	0.000653326	-1.005	-1.23	-0.81
docosapentaenoate (n3 DPA; 22:5n3)	-3.04983	2.16502e-05	0.000653326	-1.24	-1.65	-0.64
flavin adenine dinucleotide (FAD)	-2.77937	2.16502e-05	0.000653326	-3.105	-3.64	-1.79
gamma-aminobutyrate (GABA)	-2.57763	2.16502e-05	0.000653326	-1.98	-4.79	-1.04
glutarylcarnitine (C5)	-1.51469	2.16502e-05	0.000653326	-1.145	-1.49	-0.79
phytosphingosine	-1.66272	2.16502e-05	0.000653326	-1.055	-1.76	-0.69
1-arachidonoylglycerophosphocholine (20:4n6)*	-2.52033	4.33004e-05	0.000888523	-1.645	-2.44	-0.95
2-palmitoylglycerol (2-monopalmitin)	-1.96098	4.33004e-05	0.000888523	-0.805	-1.35	-0.54
3-aminoisobutyrate	-2.78134	4.33004e-05	0.000888523	-1.55	-2.29	-0.97
dihomo-linoleate (20:2n6)	-2.06541	4.33004e-05	0.000888523	-0.83	-1.21	-0.6
hydroxyisovaleroyl carnitine	-1.88502	4.33004e-05	0.000888523	-1.49	-2.31	-0.91
myristoleate (14:1n5)	-1.60232	4.33004e-05	0.000888523	-1.005	-1.47	-0.61
phenylacetylglutamine	-3.23047	4.33004e-05	0.000888523	-4.13	-5.88	-2.98
xanthine	-1.59151	4.33004e-05	0.000888523	-1.05	-1.41	-0.71
glutathione, oxidized (GSSG)	8.42952	8.53561e-05	0.00138832	2.26003	0.989982	5.88004
1-arachidonylglycerol	-2.68759	8.66007e-05	0.00138832	-1.375	-4.31	-0.83
dimethylarginine (SDMA + ADMA)	-2.86502	8.66007e-05	0.00138832	-5.4	-7.09	-2.45
histidine	-1.98612	8.66007e-05	0.00138832	-1.435	-1.88	-0.84
isoleucylglycine	-2.58169	8.66007e-05	0.00138832	-2.04	-2.83	-0.98
methionine	-2.40769	8.66007e-05	0.00138832	-2.145	-3.1	-1.08
serine	-2.4931	8.66007e-05	0.00138832	-2.805	-3.54	-1.4
1-linoleoylglycerophosphoserine*	-3.74262	0.000121499	0.00139806	-0.799473	-1.01001	-0.590022
2'-deoxyguanosine	-1.63807	0.000122435	0.00139806	-0.411285	-1.09001	-0.209992
glutathione, reduced (GSH)	8.85302	0.000122435	0.00139806	5.52998	2.13999	7.17003
linoleate, methyl ester	-3.90448	0.000122435	0.00139806	-1.16792	-4.08	-0.689983
palmitate, methyl ester	-5.57238	0.000122435	0.00139806	-1.17059	-3.36003	-0.689984
fructose	5.3052	0.000151551	0.00139806	16.765	8.08	24.63
fumarate	-2.54516	0.000151551	0.00139806	-2.5	-4.43	-1.58
linolenate [alpha or gamma; (18:3n3 or 6)]	-1.68747	0.000151551	0.00139806	-0.82	-1.12	-0.44
guanosine 3'-monophosphate (3'-GMP)	-2.08555	0.000158764	0.00139806	-1.01777	-1.36	-0.91997
1-margaroylglycerophosphoethanolamine*	-6.87558	0.000159908	0.00139806	-9.99922	-16.89	-6.29998
2-eicosapentaenoylglycerophosphoethanolamine*	-2.25834	0.000159908	0.00139806	-1.11003	-1.52007	-0.629969
oleate, methyl ester	-4.2353	0.000159908	0.00139806	-0.924399	-2.79008	-0.619999
1-eicosenoylglycerophosphoethanolamine (20:1n9)*	-6.59099	0.000194481	0.00139806	-5.19489	-8.68004	-3.78996
2-docosahexaenoylglycerophosphoethanolamine*	-3.37314	0.000194481	0.00139806	-1.12004	-1.68001	-0.90999
2-oleoylglycerophosphoethanolamine*	-5.69556	0.000194481	0.00139806	-7.19003	-10.1601	-5.45996
2-palmitoylglycerophosphoethanolamine*	-7.8098	0.000194481	0.00139806	-47.8368	-58.24	-22.2099
histamine	5.27688	0.000194481	0.00139806	2.83533	1.74998	3.52
N2-(3-cyclopentylpropanoyl)glutamine	-3.58082	0.000194481	0.00139806	-1.33707	-2.20002	-1.09998
adenosine 3'-monophosphate (3'-AMP)	-2.88848	0.00022381	0.00139806	-1.49091	-1.98997	-0.929993
stearate, methyl ester	-3.76922	0.00022381	0.00139806	-3.00329	-4.74007	-1.64006
stearoyl sphingomyelin	-4.1324	0.00022381	0.00139806	-1.88539	-2.73996	-0.960059
tyrosylhistidine	-1.73949	0.00022381	0.00139806	-0.549974	-1.03005	-0.330022
2-arachidonoylglycerophosphocholine*	-2.87736	0.000243516	0.00139806	-1.02497	-1.13001	-0.830077
1-eicosatrienoylglycerophosphocholine (20:3)*	-3.76202	0.000246656	0.00139806	-1.6753	-2.40992	-0.860029
N1-methylguanosine	-2.58637	0.000246656	0.00139806	-2.11973	-2.61995	-1.35003
1-linoleoylglycerophosphocholine (18:2n6)	-3.2177	0.000259802	0.00139806	-5.27	-9.54	-3.06
13-HODE + 9-HODE	-2.0801	0.000259802	0.00139806	-0.925	-3.49	-0.45
alpha-tocopherol	-2.03488	0.000259802	0.00139806	-0.98	-1.6	-0.43
gluconate	-1.90547	0.000259802	0.00139806	-3.055	-3.68	-1.61
hypoxanthine	-1.33362	0.000259802	0.00139806	-0.915	-1.27	-0.59
isobutyrylcarnitine	-1.92484	0.000259802	0.00139806	-1.085	-2.05	-0.54
threonine	-2.2197	0.000259802	0.00139806	-2.415	-3.17	-1.1
malonylcarnitine	-2.91755	0.000261153	0.00139806	-2.11002	-2.45993	-1.67
N2,N2-dimethylguanosine	-1.99432	0.000261153	0.00139806	-1.63887	-2.25991	-1.26007
N2-acetyllysine	-3.36653	0.000262801	0.00139806	-1.03371	-1.21994	-0.800031
oleic ethanolamide	-2.98835	0.000262801	0.00139806	-1.15488	-2.88	-0.770056
4-hydroxyhippurate	-3.60637	0.000270163	0.00139806	-1.16001	-2.35006	-0.649998
1-linoleoylglycerophosphoethanolamine*	-5.27321	0.000271155	0.00139806	-6.31005	-7.05999	-3.40999
1-stearoylglycerophosphoglycerol	-4.56461	0.000271155	0.00139806	-3.98664	-7.24997	-1.53004
2-linoleoylglycerophosphocholine*	-3.78895	0.000271155	0.00139806	-1.4248	-1.64994	-0.940033
2-oleoylglycerophosphocholine*	-3.18158	0.000271155	0.00139806	-1.36096	-1.78991	-1.09
N1-methyladenosine	-1.79741	0.000271155	0.00139806	-1.56188	-1.86997	-1.33005
riboflavin (Vitamin B2)	-3.57685	0.000271155	0.00139806	-2.80621	-3.93997	-1.97003
1-oleoylglycerophosphoinositol*	-3.52431	0.000272849	0.00139806	-2.142	-3.00998	-1.83005
1-stearoylglycerophosphoethanolamine	-6.99485	0.000272849	0.00139806	-21.5728	-27.7901	-15.04
4-acetamidobutanoate	-1.4521	0.000272849	0.00139806	-1.15009	-1.45995	-0.690041
cholesterol	-3.27528	0.000272849	0.00139806	-1.1777	-1.70994	-0.950012
succinylcarnitine	-2.17841	0.000272849	0.00139806	-0.890049	-2.23998	-0.370031
3-methylglutarylcarnitine (C6)	-4.32221	0.000276259	0.00139806	-2.3244	-10.99	-0.960059
gamma-glutamylglutamine	2.69778	0.000276259	0.00139806	1.27992	0.82005	1.64002
linoleate (18:2n6)	-2.13528	0.000276259	0.00139806	-0.866627	-1.11	-0.710054
palmitoleate (16:1n7)	-2.20592	0.000276259	0.00139806	-1.11994	-1.53991	-0.769929
stearate (18:0)	-1.5427	0.000276259	0.00139806	-0.81708	-1.04999	-0.589973
1-oleoylglycerophosphoserine	-4.57811	0.000277976	0.00139806	-1.80894	-2.26996	-1.09007
1-palmitoylglycerol (1-monopalmitin)	-3.10159	0.000277976	0.00139806	-1.7772	-2.36993	-0.860066
1-palmitoylglycerophosphoinositol*	-3.70272	0.000277976	0.00139806	-3.65449	-4.89996	-2.57002
1-palmitoylplasmenylethanolamine*	-5.27707	0.000277976	0.00139806	-11.3893	-12.07	-5.83003
10-heptadecenoate (17:1n7)	-2.14909	0.000277976	0.00139806	-0.995509	-1.3	-0.730045
2-arachidonoylglycerophosphoethanolamine*	-2.50632	0.000277976	0.00139806	-1.2434	-1.80998	-0.839927
arachidate (20:0)	-1.54531	0.000277976	0.00139806	-0.609947	-1.05003	-0.409994
docosahexaenoate (DHA; 22:6n3)	-3.98451	0.000277976	0.00139806	-3.41001	-5.62993	-2.27005
malate	-2.73862	0.000277976	0.00139806	-1.35414	-1.76995	-0.970026
margarate (17:0)	-1.79449	0.000277976	0.00139806	-0.810016	-1.05999	-0.56005
nonadecanoate (19:0)	-1.54111	0.000277976	0.00139806	-0.692214	-0.929965	-0.440072
oleate (18:1n9)	-2.87463	0.000277976	0.00139806	-1.01215	-1.39996	-0.719996
palmitate (16:0)	-1.81686	0.000277976	0.00139806	-0.77006	-0.929942	-0.62006
palmitoyl sphingomyelin	-3.24668	0.000277976	0.00139806	-1.38109	-2.18995	-1.06997
pantothenate	-2.96714	0.000277976	0.00139806	-3.95501	-5.50996	-2.56999
pro-hydroxy-pro	-0.992537	0.000277976	0.00139806	-0.777636	-1.01005	-0.430047
pseudouridine	-1.74685	0.000277976	0.00139806	-1.78159	-2.47999	-1.28002
Isobar: fructose 1,6-diphosphate, glucose 1,6-diphosphate, myo-inositol 1,4 or 1,3-diphosphate	4.69166	0.000309526	0.00154162	1.57999	1.00997	6.63006
myristate (14:0)	-1.31304	0.00032347	0.00159558	-0.670049	-0.910074	-0.489937
maltotriose	4.09311	0.000330515	0.0016148	0.900059	0.649933	2.07001
2-linoleoylglycerophosphoethanolamine*	-2.46521	0.000360484	0.00169693	-1.9206	-2.73998	-1.22003
cysteine-glutathione disulfide	4.08563	0.000360484	0.00169693	3.14001	1.17004	3.62002
1-arachidonoylglycerophosphoinositol*	-2.85095	0.000371456	0.00169693	-1.56179	-2.11998	-1.27001
pyridoxate	-2.52748	0.000373678	0.00169693	-2.6837	-3.79998	-1.78004
15-methylpalmitate (isobar with 2-methylpalmitate)	-1.48213	0.000378152	0.00169693	-0.714974	-1.18001	-0.399979
gamma-glutamylglutamate	3.02096	0.000378152	0.00169693	2.18997	1.24004	2.87
phosphoenolpyruvate (PEP)	-1.8549	0.000378152	0.00169693	-1.09375	-2.10996	-0.589951
aspartate	-2.024	0.000380403	0.00169693	-1.93001	-2.51003	-1.30001
mead acid (20:3n9)	-2.71512	0.000380403	0.00169693	-1.04775	-1.62999	-0.72002
scyllo-inositol	-3.30006	0.000380403	0.00169693	-4.735	-8.46997	-3.08
valerylcarnitine	-1.40685	0.000411353	0.00176619	-1.235	-1.9	-0.53
2-oleoylglycerophosphoserine*	-1.79494	0.000413143	0.00176619	-0.628658	-0.940046	-0.319966
4-hydroxyphenylacetate	-1.60568	0.000413143	0.00176619	-0.826788	-1.84	-0.119923
N-acetylarginine	-1.04314	0.000413143	0.00176619	-0.245188	-0.310021	-0.14996
N-acetylasparagine	-1.47249	0.000413143	0.00176619	-0.614014	-0.730086	-0.109936
glucuronate	-3.05205	0.000424061	0.00179788	-2.19386	-2.73004	-0.850039
2'-deoxyinosine	-1.8156	0.000463592	0.00192301	-0.743553	-1.06994	-0.360052
decanoylcarnitine	2.08313	0.000491345	0.00192301	1.48002	0.779954	2.51007
glycylthreonine	-3.37452	0.000491345	0.00192301	-2.44001	-4.09994	-1.81001
N2-methylguanosine	-1.91413	0.000491345	0.00192301	-1.58248	-2.20998	-1.00003
nicotinamide ribonucleotide (NMN)	-5.17541	0.000492598	0.00192301	-5.29905	-6.34008	-0.510031
inosine 5'-monophosphate (IMP)	2.48817	0.000508028	0.00192301	1.44392	0.849934	1.97004
aspartate-glutamate	-2.85109	0.000511075	0.00192301	-1.13003	-1.72993	-0.670014
adenosine 2'-monophosphate (2'-AMP)	-2.49772	0.000511453	0.00192301	-1.48999	-1.71003	-1.09006
adrenate (22:4n6)	-2.1906	0.000514372	0.00192301	-0.970011	-1.49996	-0.610035
asparagine	-2.44479	0.000517302	0.00192301	-3.04767	-5.65001	-0.850018
dihomo-linolenate (20:3n3 or n6)	-2.84909	0.000517302	0.00192301	-1.04093	-1.65993	-0.590087
docosadienoate (22:2n6)	-1.89581	0.000517302	0.00192301	-0.728372	-0.959971	-0.440004
docosapentaenoate (n6 DPA; 22:5n6)	-2.97767	0.000517302	0.00192301	-2.13092	-3.59998	-1.06002
eicosapentaenoate (EPA; 20:5n3)	-3.74612	0.000517302	0.00192301	-2.29471	-4.51005	-0.97002
eicosenoate (20:1n9 or 11)	-1.85065	0.000517302	0.00192301	-0.750002	-1.09007	-0.49998
laurate (12:0)	-0.972479	0.000517302	0.00192301	-0.557304	-0.749984	-0.340003
phenylalanine	-1.74645	0.000517302	0.00192301	-1.50995	-2.07001	-0.650047
xanthosine	-1.61495	0.000569053	0.00210017	-1.03299	-1.26993	-0.590029
ophthalmate	3.86593	0.000574759	0.00210315	1.16994	0.909999	3.16001
kynurenate	-2.14244	0.000578058	0.00210315	-1.45001	-2.14996	-0.47004
leucine	-1.72079	0.00058528	0.00211443	-1.66007	-2.28006	-0.790064
inositol 1-phosphate (I1P)	-2.28945	0.00059849	0.00214703	-1.66765	-4.31003	-0.860023
2-eicosatrienoylglycerophosphocholine*	-2.57433	0.000629486	0.00224254	-2.05959	-3.46998	-1.25005
alanylglycine	-1.44128	0.000649505	0.00225503	-1.015	-1.29	-0.5
hippurate	-3.12171	0.000649505	0.00225503	-2.15	-10.33	-1.33
1-myristoylglycerophosphocholine (14:0)	-2.46807	0.000650575	0.00225503	-0.950016	-1.22008	-0.469921
N-acetylcarnosine	-2.84134	0.000650575	0.00225503	-0.840051	-1.34006	-0.579959
isoleucylglutamine	-1.91795	0.000665477	0.0022912	-0.879937	-1.53004	-0.390006
maltotetraose	3.69217	0.000695271	0.00231366	2.82995	2.19999	5.06
tyrosine	-1.91268	0.000695271	0.00231366	-1.71335	-2.31008	-0.810008
aspartyltryptophan	-2.32316	0.000695996	0.00231366	-1.27995	-1.7	-0.479941
10-nonadecenoate (19:1n9)	-1.93546	0.000699059	0.00231366	-0.919919	-1.28	-0.540056
proline	-1.37697	0.000699059	0.00231366	-1.17186	-1.62	-0.639972
valine	-1.57887	0.000699059	0.00231366	-1.3476	-2.07	-0.730038
N-acetylglycine	-1.14491	0.000727759	0.00239321	-0.627304	-1.01002	-0.419995
acetylcarnitine	1.95255	0.00081073	0.00264907	1.43825	0.649955	2.09003
1-stearoylplasmenylethanolamine*	-5.13158	0.000849303	0.00275755	-3.31007	-15.4899	-0.580057
maltopentaose	2.76504	0.000884458	0.00283879	0.819992	0.589998	1.77001
prolylglycine	-2.34727	0.000889643	0.00283879	-1.23005	-1.60004	-1.02
laurylcarnitine	1.89072	0.000890928	0.00283879	1.75598	0.480052	4.05
Ac-Ser-Asp-Lys-Pro-OH	-1.15017	0.000914637	0.00284963	-0.610054	-0.959997	-0.400084
stearidonate (18:4n3)	-1.70467	0.000914637	0.00284963	-0.720051	-0.979948	-0.35999
uridine	-1.24527	0.000929065	0.00284963	-0.69106	-0.909959	-0.360075
17-methylstearate	-1.59999	0.000933908	0.00284963	-0.714994	-0.930037	-0.380069
aspartylvaline	-1.80233	0.000938768	0.00284963	-0.953597	-1.40997	-0.54001
isoleucine	-1.57067	0.000938768	0.00284963	-1.50603	-1.97998	-0.800002
sphingosine	-2.30775	0.000938768	0.00284963	-1.85592	-2.17003	-0.91002
uridine monophosphate (5' or 3')	2.60197	0.000938768	0.00284963	2.17062	0.740057	2.88998
erucate (22:1n9)	-1.82299	0.000974258	0.00292277	-0.68	-1.28	-0.46
sorbitol	5.31473	0.000974258	0.00292277	34.17	24.08	47.9
1-oleoylglycerol (1-monoolein)	-2.31872	0.00107436	0.00320435	-0.883294	-1.53006	-0.449948
citrate	2.38031	0.00108533	0.00321834	1.47168	0.410001	2.37003
6-phosphogluconate	5.65556	0.00113554	0.00330985	1.48994	0.309935	2.20005
cysteinylglycine	2.39256	0.00113554	0.00330985	0.699935	0.31992	2.06
maltohexaose	1.25224	0.00113554	0.00330985	0.219981	0.159969	0.590047
isoleucylarginine	-0.981813	0.00120808	0.00348987	-0.360002	-0.979914	-0.0999941
ethanolamine	-1.5735	0.00124661	0.00348987	-1.31296	-2.03994	-0.56006
glycerate	-1.35476	0.00125281	0.00348987	-0.760926	-1.02996	-0.370024
glycerol	-1.2752	0.00125281	0.00348987	-0.733243	-0.989973	-0.350038
tryptophan	-1.8026	0.00125281	0.00348987	-1.59179	-2.54993	-0.729969
N-acetylphenylalanine	-1.46755	0.00125283	0.00348987	-1.22291	-1.86004	-0.169955
thymine	-0.588062	0.00125283	0.00348987	-0.324244	-0.47004	-0.0599293
maltose	4.13309	0.0012586	0.00348987	0.858501	0.360074	2.69
cytidine	-2.90721	0.00126533	0.00348987	-0.990006	-2.32	-0.799989
N6-acetyllysine	-2.17302	0.00126533	0.00348987	-1.83001	-2.64003	-0.919929
2-stearoylglycerophosphoethanolamine*	-5.50926	0.00162467	0.00445697	-13.853	-20.25	-4.07002
glycerol 3-phosphate (G3P)	-1.13328	0.00165366	0.00448601	-0.833418	-1.25006	-0.319925
valylglycine	-2.74896	0.00165366	0.00448601	-2.57004	-3.27999	-0.850049
N-acetylalanine	-1.57372	0.00166148	0.00448601	-1.54457	-2.0401	-0.720045
N6-carbamoylthreonyladenosine	-0.81901	0.00190892	0.0051271	-0.463467	-0.700056	-0.29995
guanosine 5'-diphospho-fucose	1.71178	0.00193835	0.00517903	1.48992	0.79006	1.86997
creatinine	-1.09506	0.00210007	0.00558204	-1.015	-1.6	-0.34
tryptophylglycine	-1.11888	0.00214132	0.00565957	-0.640002	-0.989993	-0.300031
nicotinamide adenine dinucleotide reduced (NADH)	6.04943	0.0021513	0.00565957	15.0212	13.22	22.8801
1-stearoylglycerophosphocholine (18:0)	-2.87826	0.00218979	0.00567355	-5.8996	-8.00004	-1.21005
adenosine 5'-monophosphate (AMP)	2.59619	0.00218979	0.00567355	3.81044	2.03	4.65002
glutamine	-0.606607	0.00218979	0.00567355	-0.416559	-0.61996	-0.22001
1-margaroylglycerophosphocholine (17:0)	-2.87985	0.00224145	0.0057782	-1.23005	-3.46995	-0.410011
1-palmitoleoylglycerophosphocholine (16:1)*	-3.09578	0.00239963	0.00615505	-4.11804	-5.35997	-2.20001
adenosine	1.85393	0.00285596	0.00724823	1.47952	0.370032	5.61003
taurine	-1.15905	0.00285596	0.00724823	-0.763887	-1.19994	-0.429917
2-aminoadipate	1.96597	0.00286821	0.00724823	2.72004	1.29003	3.38995
2-hydroxyglutarate	2.18378	0.00298772	0.0074766	1.785	0.92	2.42
nicotinamide	-0.84146	0.00298772	0.0074766	-0.495	-0.82	-0.14
1-stearoylglycerol (1-monostearin)	-2.9649	0.00322063	0.00802032	-2.51357	-3.41006	-1.03002
guanidinoacetate	-1.14975	0.00343205	0.00839279	-0.359939	-1.13007	-6.85567e-05
N-acetyltyrosine	-1.70841	0.00343205	0.00839279	-0.690949	-1.01007	-5.89098e-05
1-myristoylglycerophosphoethanolamine	-1.81451	0.003451	0.00839279	-0.57121	-1.01005	-7.91947e-05
4-hydroxyglutamate	-2.03386	0.003451	0.00839279	-0.412318	-0.66003	-6.53076e-05
glucarate (saccharate)	-2.09757	0.003452	0.00839279	-1.14004	-1.94996	-0.54
tyrosylglycine	-1.07905	0.00371845	0.00899217	-0.650018	-1.07004	-0.360042
glycylvaline	-2.48678	0.00373359	0.00899217	-2.77592	-3.67009	-1.53995
3'-dephosphocoenzyme A	-2.20304	0.00383178	0.00914336	-0.900007	-2.07001	-0.32994
1-linoleoylglycerol (1-monolinolein)	-2.28311	0.00386766	0.00914336	-0.839996	-1.71996	-0.31995
allantoin	-1.66127	0.00386766	0.00914336	-0.885618	-0.980035	-0.249949
galactose	-1.38934	0.00386766	0.00914336	-0.628955	-0.869951	-0.319995
leucylserine	1.6296	0.00392175	0.0092287	0.739997	0.0900011	1.48001
palatinitol	2.47476	0.00411279	0.00963408	1.19999	0.529996	2.45005
propionylcarnitine	-1.0024	0.00424989	0.00990997	-0.667729	-1.06	-0.32001
4-guanidinobutanoate	-1.34215	0.00464604	0.0107847	-0.775116	-1.40007	-0.450021
aspartylleucine	-1.36701	0.00475601	0.0109902	-0.880036	-1.12993	-0.629978
valyllysine	-1.4793	0.00481154	0.0110127	-0.820859	-1.35001	-0.210045
guanosine 5'- monophosphate (5'-GMP)	1.65091	0.00483013	0.0110127	0.783656	0.21998	1.21
gulono-1,4-lactone	-1.02181	0.00483013	0.0110127	-0.87942	-1.34992	-0.270036
lysylvaline	-1.12867	0.00527765	0.0119726	-0.48655	-0.899988	-0.140059
valylhistidine	-1.93177	0.00529781	0.0119726	-1.1657	-1.95999	-0.170045
cytidine-3'-monophosphate (3'-CMP)	-1.62155	0.00541767	0.0121898	-0.729924	-1.11995	-0.139991
citrulline	0.948371	0.0054606	0.0122327	0.730048	0.290019	1.47998
lysine	-1.40814	0.00567235	0.012597	-1.375	-1.99	-0.66
oxalate (ethanedioate)	1.08889	0.00567235	0.012597	0.605	0.28	1.16
adenosine 5'diphosphoribose	2.42084	0.00621034	0.013557	3.47538	2.06004	6.47995
adipate	-2.23781	0.00621034	0.013557	-0.820082	-1.74994	-0.310017
glycylisoleucine	-1.45214	0.00621034	0.013557	-1.01997	-1.59	-0.480021
uracil	-1.38119	0.00621034	0.013557	-0.995488	-2.17997	-0.380036
gamma-glutamylisoleucine*	-1.28688	0.00677853	0.0147256	-0.795164	-1.89997	-0.250039
arginylisoleucine	-1.34212	0.00680304	0.0147256	-0.942293	-1.40994	-0.340039
glycylproline	-0.369389	0.00700082	0.0150804	-0.63561	-0.889982	-0.300044
arginine	-1.19833	0.00702575	0.0150804	-1.11449	-1.62003	-0.309936
6-keto prostaglandin F1alpha	-2.81871	0.0073351	0.0156788	-0.570023	-2.86003	-3.3229e-06
docosatrienoate (22:3n3)	-1.05029	0.00739753	0.0156815	-0.470058	-0.699975	-0.260035
gamma-tocopherol	-3.1933	0.00739753	0.0156815	-0.929977	-2.57994	-0.539963
guanine	2.20852	0.00762086	0.0160226	2.305	0.2	6.43
valylthreonine	-1.02742	0.00762086	0.0160226	-0.615	-1.26	-0.24
phenylalanylglycine	-0.711675	0.00782678	0.0163883	-0.470055	-1.03997	-0.250048
lauryl sulfate	-1.91613	0.00790866	0.0164924	-1.57371	-4.23007	-0.119973
sedoheptulose-7-phosphate	-1.69921	0.00835043	0.0173432	-0.519953	-0.919961	-0.180008
valylasparagine	-1.17876	0.00854141	0.0176683	-0.449984	-0.799994	-0.0299863
5-methyltetrahydrofolate (5MeTHF)	-2.29225	0.00865252	0.0177672	-4.98836	-7.40994	-0.330053
2-palmitoleoylglycerophosphocholine*	-1.38522	0.00872775	0.0177672	-0.335083	-1.00003	0
N-acetylvaline	-0.468504	0.00872775	0.0177672	-0.0924	-0.300058	0
squalene	-1.10823	0.00872775	0.0177672	-0.392949	-0.700039	0
methyl-alpha-glucopyranoside	2.28165	0.00883075	0.0178957	1.19132	0.100053	2.09996
phosphate	-0.478972	0.00886063	0.0178957	-0.310026	-0.469982	-0.100024
aspartylphenylalanine	-1.27894	0.00978546	0.0196861	-0.749946	-1.00997	-0.430045
alanylvaline	-1.08827	0.00998096	0.0199231	-0.660339	-1.38999	-0.199925
isoleucylthreonine	-1.41166	0.00998096	0.0199231	-0.713377	-1.47999	-0.260057
caprate (10:0)	-0.617623	0.0100465	0.0199763	-0.460023	-0.770003	-0.129961
nicotinamide adenine dinucleotide (NAD+)	1.58264	0.0101323	0.0200131	1.985	0.38	3.42
1-dihomo-linoleoylglycerophosphocholine (20:2n6)*	-1.9083	0.0101431	0.0200131	-1.07446	-2.11999	-0.210033
2-stearoylglycerophosphocholine*	-2.94855	0.0110121	0.0216445	-3.13773	-4.33999	-0.430044
glycine	-0.717314	0.0113333	0.0221908	-0.485076	-0.760036	-0.139946
valylarginine	-0.659552	0.011387	0.0222112	-0.30995	-0.659981	-0.0400015
isoleucylalanine	-1.05355	0.0126065	0.0244968	-0.825521	-1.29997	-0.150001
cis-aconitate	1.34117	0.0126847	0.0245388	0.575336	0.0700356	0.919976
Isobar: UDP-acetylglucosamine, UDP-acetylgalactosamine	1.13579	0.0127238	0.0245388	0.920014	0.390039	1.40002
glycerophosphoethanolamine	-1.57643	0.0128065	0.0245916	-0.680015	-2.22998	-0.130019
2-linoleoylglycerol (2-monolinolein)	-1.66994	0.0128471	0.0245916	-0.51001	-1.06	-0.130061
isovalerylcarnitine	-1.73714	0.0132716	0.0251229	-1.17	-3.64	-0.29
kynurenine	2.00435	0.0132716	0.0251229	1.07	0.2	1.98
valylalanine	-0.864676	0.0132716	0.0251229	-0.55	-1.12	-0.14
7-beta-hydroxycholesterol	-2.23914	0.0134646	0.0253947	-0.819988	-1.27997	-0.180067
tyrosylvaline	0.812746	0.0155657	0.029235	0.340046	6.54615e-05	0.609954
2-arachidonoyl glycerol	-2.13011	0.0156148	0.029235	-1.02001	-2.63993	-4.836e-05
valylaspartate	-0.787317	0.0196936	0.0367375	-0.441378	-0.810039	-0.139945
carnitine	-0.412611	0.0199102	0.0367407	-0.265402	-0.500038	-0.0600399
hypotaurine	-0.881841	0.0199102	0.0367407	-0.643077	-1.25005	-0.100076
putrescine	2.32455	0.0199102	0.0367407	1.06004	0.540032	3.67001
2-docosapentaenoylglycerophosphoethanolamine*	-0.95055	0.0204668	0.0375348	-0.419995	-0.989904	-3.16492e-05
tyrosylarginine	-0.827819	0.0204868	0.0375348	-0.0876709	-0.380068	0
gamma-glutamylmethionine	0.879957	0.0216596	0.0395423	0.610057	0.120037	1.23997
arginylleucine	0.850253	0.0234308	0.0426241	0.37997	0.0500564	0.830069
choline phosphate	0.859221	0.0246815	0.0447407	0.506225	0.0700272	1.28997
leucylhistidine	-0.601923	0.0258805	0.046749	-0.0400339	-0.44995	-6.39125e-05
taurochenodeoxycholate	2.55692	0.0264934	0.0476882	0.62181	6.88149e-05	1.50993
phenylalanylglutamate	-0.48558	0.0267426	0.0479684	-0.320076	-0.599959	-0.079943
ascorbate (Vitamin C)	1.29148	0.0279287	0.0495759	0.955	0.16	1.69
deoxycarnitine	0.615581	0.0279287	0.0495759	0.465	0.14	1.38
ribulose	-0.506775	0.0279287	0.0495759	-0.735	-1.17	-0.16
glycerophosphorylcholine (GPC)	-0.872793	0.0304133	0.0538001	-0.480279	-0.869996	-0.130013
3-hydroxyhippurate	-2.82267	0.0327472	0.0577296	-1.23998	-6.41995	-5.35244e-05
ergothioneine	0.984852	0.033685	0.0591794	0.515199	0.0999527	0.990079
octanoylcarnitine	1.05866	0.0339324	0.0594107	0.650044	4.50696e-05	1.69996
7-alpha-hydroxy-3-oxo-4-cholestenoate (7-Hoca)	1.10364	0.0344455	0.060104	0.32007	5.57187e-05	0.609922
erythritol	2.84951	0.0349867	0.0608413	2.81	0.03	5.96
phosphoethanolamine	0.512776	0.040694	0.0705271	0.360047	2.41369e-05	1.00992
valylserine	-1.01482	0.041049	0.0708179	-0.644774	-1.34998	-0.159954
myo-inositol	-1.03474	0.0411379	0.0708179	-0.809833	-2.00005	-0.0499577
caproate (6:0)	-0.736807	0.0417464	0.0716252	-0.455146	-0.78003	-1.02372e-06
leucylarginine	-0.601413	0.0425372	0.0727386	-0.190081	-0.649997	6.49308e-05
2-hydroxystearate	-0.766879	0.0434736	0.0736037	-0.375	-0.97	-0.01
adenine	-0.811726	0.0434736	0.0736037	-0.605	-1.18	-0.04
ribitol	3.55407	0.0434736	0.0736037	7.07	2.28	10.54
phenylalanylleucine	-0.155124	0.0443224	0.074794	-0.230011	-0.610003	-4.37247e-05
tyrosylglutamine	-0.480997	0.0447937	0.0753415	-0.309991	-0.700026	-0.0299574
N-acetyl-aspartyl-glutamate (NAAG)	1.37551	0.0453607	0.0757981	1.61055	0.27001	2.95999
sorbitol 6-phosphate	4.65142	0.0453607	0.0757981	15.7403	8.01007	30.88
indolelactate	0.823184	0.0465486	0.0775307	0.497904	2.08226e-05	1.12995
5,6-dihydrouracil	0.783714	0.0510328	0.0847243	0.677734	-1.94697e-05	1.10995
dehydroisoandrosterone sulfate (DHEA-S)	-0.585961	0.0528894	0.0875234	-0.719973	-1.21005	0.00999647
oleoylcarnitine	1.11587	0.0534759	0.0882095	1.86	-0.04	4.3
ribose	-0.119901	0.0546943	0.0899301	-0.802239	-1.30007	0.0199394
S-methylcysteine	-0.691108	0.0549073	0.0899918	-0.51416	-1.11004	0.019993
fructose 1-phosphate	2.15131	0.0601638	0.0978538	2.63291	-0.10998	3.43003
pyrophosphate (PPi)	0.952269	0.0602764	0.0978538	1.31851	-0.0100004	2.35005
succinate	-1.25125	0.0602764	0.0978538	-0.889953	-1.88006	0.0100677
spermidine	0.86353	0.0652536	0.1056	0.395	-0.05	1.17
beta-alanine	-0.916935	0.0660737	0.106256	-0.420015	-0.859946	0.0399821
tyrosylglutamate	-0.328696	0.0660737	0.106256	-0.279985	-0.589991	0.0100183
fucose	-0.876037	0.0680737	0.109131	-0.551118	-1.05998	1.40753e-05
isoleucylisoleucine	1.02402	0.0697409	0.111455	0.439965	-1.95113e-05	0.630046
4-methylcatechol sulfate	0.220225	0.0861348	0.137227	0.829981	-0.0899961	2.11996
threonylphenylalanine	1.08612	0.091133	0.144741	0.499685	-0.00999327	1.03001
valylglutamine	-0.708709	0.094022	0.148868	-0.541738	-1.08005	0.0499627
erythronate*	-0.45904	0.0947195	0.149052	-0.385	-0.8	0.25
palmitoylcarnitine	0.904076	0.0947195	0.149052	0.77	-0.12	2.38
isoleucylvaline	-0.606989	0.100963	0.158391	-0.479953	-0.909996	0.0899594
adenylosuccinate	-1.48382	0.101717	0.159061	-0.569856	-1.88995	0.0999543
N-ethylglycinexylidide*	-1.02708	0.102169	0.159061	-0.681406	-1.54995	0.159971
glutamate, gamma-methyl ester	0.927925	0.10232	0.159061	0.839956	-0.100037	2.34002
3-(4-hydroxyphenyl)lactate	1.02162	0.108203	0.167699	0.711678	-0.0299669	1.29995
7-alpha-hydroxycholesterol	-2.95738	0.10857	0.16776	-0.313128	-0.690006	7.62894e-05
serylvaline	-0.842459	0.110562	0.170325	-0.531319	-0.969956	0.0299724
cysteine	-0.551886	0.111033	0.170539	-1.63579	-3.39997	0.559932
lactate	0.434179	0.112754	0.172665	0.345	-0.11	0.74
pipecolate	0.909727	0.124967	0.190798	0.575981	-0.129948	1.31998
3-indoxyl sulfate	0.692571	0.130742	0.199023	0.884131	-0.200061	2.50996
cytidine 5'-diphosphocholine	1.49946	0.1333	0.201126	2.74	-0.16	4.55
glucose	0.745654	0.1333	0.201126	0.36	-0.14	1.01
glycerol 2-phosphate	0.891795	0.1333	0.201126	0.385	-0.39	0.97
adenosine 5'-triphosphate (ATP)	2.87962	0.135493	0.203835	4.31228	-0.0399969	7.90999
phenylalanylisoleucine	-0.446135	0.140771	0.211156	-0.276481	-0.590003	0.0599996
dehydroascorbate	0.446334	0.145674	0.217874	0	0	5.31692e-05
glutamate	-0.278695	0.15196	0.226614	-0.149931	-0.419991	0.0899979
histidylleucine	0.148698	0.152501	0.226642	-0.284122	-0.679956	0.269942
gamma-glutamylphenylalanine	-0.577227	0.152862	0.226642	-0.563772	-1.07	0.140019
androsterone sulfate	-0.543439	0.156401	0.229896	-0.53	-1.58	0.35
leucylthreonine	-0.435443	0.156401	0.229896	-0.405	-0.94	0.18
stachydrine	1.16701	0.156401	0.229896	0.47	-0.32	2.19
N-acetylleucine	-0.699048	0.157056	0.2302	-4.27547e-05	-0.619966	5.88771e-05
caprylate (8:0)	0.524683	0.158899	0.232237	0.0599622	-2.70688e-05	0.450044
inosine	-0.443094	0.164938	0.240379	-0.339808	-0.720006	0.190036
butyrylcarnitine	0.48777	0.182316	0.264952	0.67	-0.36	1.26
cystine	1	0.188037	0.272494	6.19429e-05	-2.91522e-05	0.500066
phenylalanylserine	0.742842	0.189073	0.273022	0.24212	-0.159948	0.61005
5-aminovalerate	0.281008	0.189465	0.273022	0.353635	-0.439952	0.929957
glycylleucine	-0.460452	0.191029	0.274503	-0.2754	-0.900001	0.250048
hydrochlorothiazide	-1.35568	0.192976	0.275756	0	-7.77132e-05	0
hydroxypioglitazone (M-IV)	-0.419539	0.192976	0.275756	0	-9.14822e-05	0
anserine	-0.80081	0.19434	0.276934	-0.260004	-1.70993	0.179989
taurocholate	2.06896	0.201666	0.286578	0.608838	-0.229994	2.49997
trigonelline (N'-methylnicotinate)	-0.985632	0.205269	0.290373	-0.440009	-1.92994	0.369987
acisoga	-0.432415	0.205468	0.290373	-0.359963	-0.860001	0.159971
valylglutamate	0.814613	0.211024	0.297405	0.505	-0.21	1.08
isoleucylphenylalanine	-0.302912	0.21639	0.304132	-0.209936	-0.560047	0.159985
isoleucylleucine	0.690869	0.21864	0.306455	0.295667	-0.170053	1.31007
1,5-anhydroglucitol (1,5-AG)	0.534751	0.220266	0.307338	0.338354	-0.239956	1.30997
hexanoylcarnitine	0.707487	0.220469	0.307338	0.975873	-0.420036	2.19002
pelargonate (9:0)	-0.368033	0.235209	0.324908	-0.210054	-0.529912	0.129912
3-phosphoglycerate	-0.498452	0.235621	0.324908	-0.269983	-0.929965	0.32999
arabitol	-0.403192	0.235621	0.324908	-0.446808	-1.36997	0.439974
1,2-propanediol	-0.0793744	0.236033	0.324908	-0.179959	-0.47	0.189989
alpha-hydroxyisovalerate	0.328753	0.236239	0.324908	0.298038	-0.320024	0.690041
betaine	-0.826356	0.252791	0.346743	-0.279399	-1.12001	0.150049
phenylalanyltyrosine	0.0397767	0.255908	0.350082	-3.49962e-05	-0.109954	2.64364e-05
N-acetylglutamine	0.611018	0.268023	0.36568	0.230024	-0.129938	0.769942
valylmethionine	0.340581	0.269636	0.366906	0.20003	-0.0600386	0.409966
quinolinate	-0.322046	0.27683	0.374641	-1.73087e-05	-0.499958	6.93241e-05
VGAHAGEYGAEALER*	0.46105	0.27683	0.374641	4.12741e-05	-2.65792e-05	0.200032
2-hydroxypalmitate	-0.517848	0.277512	0.374641	-0.175	-0.58	0.14
beta-tocopherol	-1.8618	0.298749	0.402253	-6.29528e-05	-0.709976	5.64213e-05
valylvaline	-0.0987851	0.303154	0.407115	-0.239927	-0.72005	0.349982
lidocaine	-0.74662	0.306584	0.407248	-0.675829	-1.14994	0.220075
xylulose	-0.455082	0.306584	0.407248	-0.319956	-0.869951	0.349962
tetraethylene glycol	-0.492267	0.307009	0.407248	-0.404019	-1.54002	0.260057
dimethylglycine	-0.607863	0.307222	0.407248	-0.151318	-0.739966	0.229959
serylmethionine	-0.293408	0.307222	0.407248	-0.160805	-0.559937	0.189936
gamma-glutamylvaline	-0.430104	0.315378	0.413783	-0.245	-0.79	0.22
N-acetylthreonine	-0.271941	0.315378	0.413783	-0.19	-0.52	0.16
pentadecanoate (15:0)	0.840772	0.315378	0.413783	0.23	-0.32	1.52
stearoylcarnitine	-0.591617	0.315378	0.413783	-0.56	-1.76	1.1
trans-4-hydroxyproline	-0.407913	0.326762	0.427625	-0.296861	-0.779955	0.139947
arginylphenylalanine	-0.875255	0.339913	0.443703	-8.48075e-06	-0.890026	2.80053e-05
leucyltyrosine	0.109299	0.342782	0.445182	0	0	5.12084e-05
spermine	0.415037	0.342782	0.445182	0	0	8.42279e-05
leucylleucine	-0.00264472	0.346686	0.449116	-0.275362	-0.659988	0.249959
C-glycosyltryptophan*	-0.207702	0.356232	0.459163	-0.125	-0.37	0.14
N-acetylaspartate (NAA)	-0.852658	0.356232	0.459163	-0.745	-3.46	0.83
tyrosylleucine	-0.040642	0.364751	0.468965	-0.0230855	-0.499967	0.0500179
pyroglutamine*	-0.385047	0.368898	0.473111	-0.234634	-0.920009	0.379944
glucose 1-phosphate	2.5831	0.370614	0.474127	4.37648e-05	-4.13765e-05	0.930036
3-methoxytyrosine	0.881701	0.37908	0.483751	0.246451	-0.0700133	0.679986
phenylcarnitine*	-0.67759	0.387891	0.493767	-8.99191e-05	-0.509939	1.35753e-05
alanylleucine	0.408071	0.390851	0.494122	0.238824	-0.389939	0.699992
triethyleneglycol	-0.0696328	0.391059	0.494122	-0.187706	-0.929972	0.359957
valylleucine	0.374396	0.391059	0.494122	0.277905	-0.309938	0.699965
cholate	0.515027	0.395867	0.498968	2.25357e-05	-1.92851e-05	0.980013
oxypurinol	-0.0119726	0.399075	0.500552	0	-9.49193e-05	0
warfarin	-0.0029116	0.399075	0.500552	0	-9.49193e-05	0
fructose-6-phosphate	-0.0921016	0.41319	0.514256	-0.162843	-0.560045	0.609972
3-carboxy-4-methyl-5-propyl-2-furanpropanoate (CMPF)	0.713636	0.413806	0.514256	0.667244	-0.57002	4.65994
mannose	-0.331825	0.414011	0.514256	-0.217381	-0.690011	0.319974
S-adenosylhomocysteine (SAH)	0.106105	0.414011	0.514256	-0.059985	-0.200074	0.28003
paraxanthine	0.333704	0.43701	0.539811	0.0265321	-0.229922	0.330019
alanylisoleucine	-0.179415	0.437137	0.539811	-0.115504	-0.430087	0.299951
5-oxoproline	-0.135321	0.437742	0.539811	-0.234605	-0.539974	0.399947
4-hydroxybutyrate (GHB)	-0.290491	0.446968	0.547242	-0.53	-1.29	0.79
hydroxybutyrylcarnitine*	-0.384855	0.446968	0.547242	-0.17	-0.76	0.25
threonate	0.236116	0.446968	0.547242	-0.27	-0.73	0.37
valyltryptophan	-0.0869817	0.456842	0.558	-3.18232e-05	-0.129996	1.48015e-05
N-acetylmethionine	0.964143	0.462236	0.562992	0.208895	-0.230008	0.679964
glutamine-leucine	0.486559	0.463124	0.562992	-4.33767e-05	-0.529957	0.200002
phenylalanylalanine	0.953663	0.483808	0.586746	0.095916	-0.139932	0.789981
3-methyl-2-oxovalerate	0.67715	0.493559	0.597159	2.9756e-05	-5.36405e-05	0.0500169
bilirubin (Z,Z)	1.72337	0.495448	0.598034	2.88256e-05	-0.0499827	1.72002
acetylcholine	1.79453	0.507035	0.609155	0.259646	-0.409945	1.00005
glycylphenylalanine	-0.0892895	0.507035	0.609155	-0.0998713	-0.409929	0.189973
pseudoephedrine	-1.72994	0.527391	0.63213	-3.56294e-05	-0.819978	3.97734e-05
asparagylleucine	0.361598	0.538325	0.643731	-0.151031	-0.470056	0.389984
3-hydroxybutyrate (BHBA)	-0.0102443	0.548962	0.653405	-0.19	-0.84	1.4
leucylglutamate	0.035711	0.548962	0.653405	-0.115	-0.46	0.32
prostaglandin E2	-1.0641	0.554667	0.658668	-1.54024e-05	-0.909993	0.27004
atenolol	-0.577545	0.562983	0.666999	-1.50947e-06	-8.96096e-06	9.50974e-06
piperine	0.0605047	0.567288	0.667675	-0.150518	-0.500008	0.710008
tryptophan betaine	0.0943924	0.567288	0.667675	-0.20007	-0.59003	0.399969
creatine	0.869968	0.567459	0.667675	0.579521	-0.410063	1.63
heme	1.43712	0.59218	0.695168	0.275924	-0.579992	4.16009
urea	-0.92727	0.60378	0.707167	-0.49	-2.68	0.93
ornithine	0.400085	0.624054	0.729248	0.191093	-0.390005	0.620015
threitol	1.53459	0.651949	0.754753	0.0858794	-0.549948	1.80003
2-oleoylglycerol (2-monoolein)	-0.117184	0.652798	0.754753	-1.79432e-05	-4.48517e-05	3.02011e-05
prostaglandin B2	-0.12827	0.652798	0.754753	-3.99972e-05	-5.76372e-06	2.46571e-05
2-hydroxybutyrate (AHB)	0.271504	0.653237	0.754753	0.138709	-0.509939	0.830027
serylphenyalanine	0.16777	0.653237	0.754753	0.0997578	-0.429993	0.559967
4-androsten-3beta,17beta-diol disulfate 1*	0.0809638	0.66072	0.761684	0.085	-0.43	0.58
prostaglandin A2	-0.916401	0.673515	0.774693	-4.29927e-05	-0.239982	4.62266e-05
leucylasparagine	0.288239	0.680295	0.780741	0.0499835	-0.369994	0.590018
4-methyl-2-oxopentanoate	0.398056	0.691147	0.791425	-5.99728e-05	-0.340014	0.430075
N-delta-acetylornithine*	0.492476	0.711972	0.804094	0.0248131	-0.659978	1.00997
valyltyrosine	0.240009	0.712094	0.804094	0.114474	-0.399998	0.719955
heptaethylene glycol	0.214563	0.7127	0.804094	0.0603845	-0.940023	1.18995
16-hydroxypalmitate	-0.178183	0.713183	0.804094	-0.1257	-0.559963	0.259955
alanylphenylalanine	0.362485	0.713183	0.804094	0.0600447	-0.229948	0.529985
N-acetylneuraminate	0.195072	0.713183	0.804094	-0.0646528	-0.290021	0.319964
sarcosine (N-Methylglycine)	-0.0399035	0.713183	0.804094	-0.0578844	-0.41998	0.469923
2-aminobutyrate	-0.301743	0.719695	0.809657	-0.14	-0.54	0.18
glycolithocholate sulfate*	-0.491219	0.723973	0.812687	-1.38614e-05	-0.41001	0.109969
isoleucylserine	-0.0577362	0.743428	0.831255	-0.11925	-0.759989	0.589961
glucose-6-phosphate (G6P)	0.155669	0.743754	0.831255	-0.0502548	-0.619994	0.76996
phenylalanylvaline	0.104306	0.747951	0.834128	-2.52756e-05	-9.56019e-06	2.30891e-05
2-phosphoglycerate	-0.228626	0.773106	0.858644	-0.0289774	-0.830059	0.609995
arabonate	-0.0778776	0.774955	0.858644	-0.0394805	-0.410032	0.289973
xylonate	-0.0798777	0.774955	0.858644	-0.0613709	-0.509935	0.379987
caffeine	0.387891	0.804592	0.887746	3.92291e-05	-2.22112e-05	0.0300472
gamma-glutamylleucine	0.0205569	0.806413	0.887746	-0.0355447	-0.580003	0.540058
hexaethylene glycol	0.156795	0.806413	0.887746	-0.0399886	-0.809995	1.30002
isoleucyltyrosine	-0.0962639	0.82025	0.901046	5.50594e-05	-0.230026	0.319972
leucylalanine	0.263595	0.838116	0.918704	0.0700573	-0.369977	0.58991
5-methylthioadenosine (MTA)	-0.0188446	0.842105	0.919149	-0.065	-0.63	0.67
catechol sulfate	0.518586	0.842105	0.919149	0.19	-1.41	1.64
vecuronium	-0.806447	0.900999	0.973115	3.19345e-05	-0.880051	0.609986
asparagylisoleucine	0.0477757	0.902353	0.973115	-0.0366017	-0.48996	0.519981
methylphosphate	-0.136659	0.902353	0.973115	-0.0165088	-0.749977	0.669947
azelate (nonanedioate)	0.825796	0.902438	0.973115	0.0619219	-0.45997	0.76999
guanosine	0.227061	0.904826	0.973115	0.06	-0.48	0.65
phenol sulfate	-0.455258	0.904826	0.973115	0.06	-1.75	0.62
serylleucine	0.22961	0.904826	0.973115	-0.05	-0.52	0.46
mannose-6-phosphate	0.623911	0.93461	0.997094	0.0124171	-0.459992	0.709978
seryltyrosine	0.0675068	0.934782	0.997094	0.0364347	-0.499913	0.520049
cytidine 5'-monophosphate (5'-CMP)	-0.0722121	0.934897	0.997094	-0.0100268	-0.380041	0.28005
leucylglycine	-0.00015579	0.934897	0.997094	-0.0131042	-0.500078	0.439995
pivaloylcarnitine	-1.4709	0.966924	1	-1.41048e-05	-0.659947	0.350046
valylphenylalanine	0.48084	0.967364	1	0.0761673	-0.359929	0.539985
3-dehydrocarnitine*	0.562802	0.967393	1	0.0248716	-0.489949	1.02993
Isobar: ribulose 5-phosphate, xylulose 5-phosphate	0.605515	0.967407	1	0.0227427	-0.38997	1.24997
octaethylene glycol	0.336511	0.967407	1	-0.00524815	-0.970014	1.32003
xylitol	0.5859	0.968239	1	0.03	-1	1.3
pentaethylene glycol	0.00924042	0.968239	1	-0.06	-1.09	1.1
1,3-dihydroxyacetone	0.601485	1	1	-0.0457015	-0.449971	1.11998
2-hydroxyacetaminophen sulfate*	0	1	1
2-methoxyacetaminophen sulfate*	0	1	1
3-(cystein-S-yl)acetaminophen*	0	1	1
4-acetamidophenol	0	1	1
4-acetaminophen sulfate	0	1	1
carboxyibuprofen	0	1	1
celecoxib	0	1	1
cytidine 5'-monophospho-N-acetylneuraminic acid	0	1	1
DSGEGDFXAEGGGVR*	0	1	1
erythrose-4-phosphate	0	1	1
erythrulose	1.83812	1	1	4.63783e-05	-0.460045	1.42995
L-methyldopa	0	1	1
linoleamide (18:2n6)	0	1	1
lipitor	0	1	1
mannitol	0.201158	1	1	5.43904e-05	-3.99997	12.04
metformin	0	1	1
methyl-beta-glucopyranoside	0	1	1
metoprolol	0	1	1
metoprolol acid metabolite*	0	1	1
olanzapine	0	1	1
p-cresol sulfate	-0.0837006	1	1	-0.01	-0.96	0.64
phenylalanylaspartate	0.0598094	1	1	-5.42597e-05	-0.299986	0.289945
theobromine	0.300333	1	1	-2.69826e-05	-0.749989	1.10008
urate	0.0290273	1	1	0.0100133	-0.410014	0.469951

## Sheet: CCPAPvsCCRCC
	FC	P	PAdj	PseudoMedian	Lower95CI_PseudoMedian	Upper95CI_PseudoMedian
2-arachidonoylglycerophosphoethanolamine*	-2.45334	2.16502e-05	0.00185109	-1.15	-1.75	-0.68
dihomo-linoleate (20:2n6)	-4.38933	2.16502e-05	0.00185109	-4.14	-6.68	-2.07
eicosenoate (20:1n9 or 11)	-5.00831	2.16502e-05	0.00185109	-6.83	-13.76	-5.09
erucate (22:1n9)	-4.94389	2.16502e-05	0.00185109	-7.365	-13.69	-4.32
linoleate (18:2n6)	-3.06075	2.16502e-05	0.00185109	-1.8	-2.51	-1.11
myristate (14:0)	-1.97047	2.16502e-05	0.00185109	-1.445	-2.16	-0.55
1-arachidonoylglycerophosphoethanolamine*	-2.42031	4.33004e-05	0.00246812	-0.87	-1.17	-0.54
cis-vaccenate (18:1n7)	-3.55916	4.33004e-05	0.00246812	-1.755	-2.98	-0.89
oleate (18:1n9)	-3.55394	4.33004e-05	0.00246812	-1.735	-2.82	-0.8
2-palmitoylglycerol (2-monopalmitin)	-2.37297	8.66007e-05	0.00375267	-1.455	-2.08	-0.93
docosapentaenoate (n3 DPA; 22:5n3)	-3.68712	8.66007e-05	0.00375267	-1.04	-3.59	-0.81
1-oleoylglycerophosphoethanolamine	-2.77302	0.000151551	0.00375267	-0.995	-2.01	-0.41
13-HODE + 9-HODE	-3.5908	0.000151551	0.00375267	-3.47	-7.71	-1.45
stearoyl sphingomyelin	-3.19057	0.000222344	0.00375267	-0.800051	-1.43001	-0.720032
1-eicosatrienoylglycerophosphocholine (20:3)*	-3.45792	0.000246656	0.00375267	-0.780075	-2.90991	-0.460052
1-arachidonoylglycerophosphocholine (20:4n6)*	-2.70171	0.000259802	0.00375267	-1.2	-1.99	-0.4
3-aminoisobutyrate	-4.7298	0.000259802	0.00375267	-5.835	-11.62	-0.57
arachidonate (20:4n6)	-2.00038	0.000259802	0.00375267	-0.885	-1.46	-0.4
isoleucylglycine	-1.91293	0.000259802	0.00375267	-1.025	-1.72	-0.3
linolenate [alpha or gamma; (18:3n3 or 6)]	-3.09362	0.000259802	0.00375267	-2.25	-3.41	-1.36
oleic ethanolamide	-2.83935	0.000262801	0.00375267	-1.26006	-2.22996	-0.41006
N-acetyl-aspartyl-glutamate (NAAG)	4.74086	0.00026612	0.00375267	2.67204	1.38	3.76003
2-oleoylglycerophosphoethanolamine*	-2.43106	0.000270163	0.00375267	-0.57004	-0.899957	-0.349968
cholesterol	-3.1108	0.000271155	0.00375267	-1.05005	-1.25	-0.820011
N-acetylaspartate (NAA)	4.13068	0.000272849	0.00375267	1.44998	0.730004	2.76003
15-methylpalmitate (isobar with 2-methylpalmitate)	-2.6283	0.000276259	0.00375267	-2.19428	-2.96995	-1.13001
stearate (18:0)	-1.91785	0.000276259	0.00375267	-1.10435	-1.51998	-0.650011
10-heptadecenoate (17:1n7)	-3.67543	0.000277976	0.00375267	-2.8854	-4.37999	-1.67008
10-nonadecenoate (19:1n9)	-3.87344	0.000277976	0.00375267	-3.02449	-7.33	-1.93005
17-methylstearate	-2.86796	0.000277976	0.00375267	-1.73002	-2.48997	-1.06007
arachidate (20:0)	-2.84707	0.000277976	0.00375267	-2.03541	-3.22996	-1.52007
aspartylvaline	-2.65301	0.000277976	0.00375267	-0.943493	-2.41997	-0.660025
docosadienoate (22:2n6)	-4.35841	0.000277976	0.00375267	-3.35001	-5.96997	-2.40007
margarate (17:0)	-2.20771	0.000277976	0.00375267	-1.21737	-1.53999	-0.61
nonadecanoate (19:0)	-2.65473	0.000277976	0.00375267	-1.61335	-2.40992	-0.96003
palmitate (16:0)	-2.24787	0.000277976	0.00375267	-1.24996	-1.51992	-0.65996
palmitoleate (16:1n7)	-3.74744	0.000277976	0.00375267	-3.17754	-6.26997	-1.42001
palmitoyl sphingomyelin	-2.63494	0.000277976	0.00375267	-0.989976	-1.54005	-0.710035
tyrosylhistidine	-2.70122	0.000309077	0.00406555	-1.66572	-2.79005	-0.820041
docosatrienoate (22:3n3)	-3.49999	0.000339239	0.00415573	-3.34003	-4.93996	-1.88006
2-linoleoylglycerophosphocholine*	-3.91193	0.000371456	0.00415573	-1.32132	-3.15994	-0.210024
1-stearoylglycerophosphoethanolamine	-3.11582	0.000373678	0.00415573	-0.956701	-1.71997	-0.590067
succinylcarnitine	-1.98765	0.000373678	0.00415573	-1.21497	-1.31999	-0.670007
decanoylcarnitine	1.80035	0.00037591	0.00415573	1.18187	0.830019	2.51003
laurate (12:0)	-1.01419	0.000378152	0.00415573	-0.596482	-0.819996	-0.370029
2-arachidonoylglycerophosphocholine*	-3.3449	0.00039215	0.00415573	-0.861791	-2.04992	-0.239981
linoleate, methyl ester	-2.74147	0.000410321	0.00415573	-0.750046	-1.15	-0.0399434
1-stearoylglycerophosphoinositol	-2.05586	0.000411353	0.00415573	-0.79	-1.19	-0.3
1-linoleoylglycerophosphoserine*	-4.52893	0.000413143	0.00415573	-1.64441	-1.82005	-0.219999
N-acetylphenylalanine	-1.12843	0.000413143	0.00415573	-0.391908	-0.79004	-0.129952
tyrosylarginine	-2.18349	0.000413143	0.00415573	-1.17112	-2.68008	-0.48996
2-linoleoylglycerol (2-monolinolein)	-3.39417	0.000463592	0.00457351	-1.97413	-4.34999	-0.83004
1-stearoylglycerol (1-monostearin)	-2.41976	0.000508545	0.00473886	-1.48169	-2.38999	-0.590011
1-palmitoylglycerol (1-monopalmitin)	-2.85975	0.000514372	0.00473886	-1.31	-2.58998	-0.689964
laurylcarnitine	2.24414	0.000514372	0.00473886	1.84765	0.620002	4.05005
dihomo-linolenate (20:3n3 or n6)	-3.4424	0.000517302	0.00473886	-1.91491	-2.84998	-0.680004
sedoheptulose-7-phosphate	-2.86958	0.000578058	0.00514777	-1.40996	-2.06998	-0.680037
1-linoleoylglycerophosphoethanolamine*	-2.68562	0.000582009	0.00514777	-0.909778	-1.15001	-0.300026
1-margaroylglycerophosphoethanolamine*	-1.97388	0.000646597	0.0053525	-0.159993	-0.350013	-0.11997
oleate, methyl ester	-3.04439	0.000646597	0.0053525	-0.900015	-0.950035	-0.169994
adenosine	2.10758	0.000649505	0.0053525	1.57	0.6	5.9
uridine	-1.25164	0.000691498	0.0053525	-0.639153	-0.969992	-0.389972
glucose-6-phosphate (G6P)	-3.09091	0.000695271	0.0053525	-6.82159	-8.68994	-4.81002
valylglycine	-2.09163	0.000695271	0.0053525	-1.14	-2.06993	-0.369993
1-oleoylglycerophosphoserine	-3.84385	0.000699059	0.0053525	-0.995104	-1.39999	-0.310039
adrenate (22:4n6)	-2.75058	0.000699059	0.0053525	-1.17777	-2.97999	-0.569943
eicosapentaenoate (EPA; 20:5n3)	-3.08623	0.000699059	0.0053525	-1.41448	-2.57003	-0.780016
gamma-tocopherol	-4.58022	0.000895636	0.00633668	-2.93408	-7.13996	-0.780047
riboflavin (Vitamin B2)	-1.79776	0.000919429	0.00633668	-0.819971	-1.08998	-0.249938
fructose-6-phosphate	-2.70403	0.000924239	0.00633668	-3.24541	-4.62995	-2.04004
stearidonate (18:4n3)	-3.68477	0.000924239	0.00633668	-1.90725	-3.23	-0.740054
cytidine	-1.81796	0.000931379	0.00633668	-0.43	-0.829913	-0.230046
glycerate	-1.42691	0.000933908	0.00633668	-0.740004	-0.939966	-0.420065
1-eicosenoylglycerophosphoethanolamine (20:1n9)*	-3.60591	0.00093776	0.00633668	-0.374033	-1.04995	-0.239962
docosahexaenoate (DHA; 22:6n3)	-2.78485	0.000938768	0.00633668	-1.10921	-1.78998	-0.530027
tyrosylglycine	-1.88306	0.000938768	0.00633668	-1.57284	-2.16006	-0.580045
glutamine	-0.903532	0.000974258	0.00640762	-0.565	-1.09	-0.19
sorbitol	3.12703	0.000974258	0.00640762	31.72	0.92	47.81
2'-deoxyinosine	-2.13816	0.0011386	0.00739372	-0.730062	-2.35996	-0.399996
lysylvaline	-2.05418	0.00119781	0.00746218	-1.55993	-2.18999	-0.670012
docosapentaenoate (n6 DPA; 22:5n6)	-2.30033	0.00124044	0.00746218	-0.938144	-2.27001	-0.410002
tyrosylglutamate	-1.45915	0.00124661	0.00746218	-1.2385	-1.62998	-0.880017
2-oleoylglycerophosphoserine*	-1.62137	0.00125283	0.00746218	-0.594112	-0.890022	-0.00999307
4-hydroxyglutamate	-3.46303	0.00125283	0.00746218	-0.935552	-2.94002	-0.0499555
N-acetylasparagine	-3.29855	0.00125283	0.00746218	-1.59493	-3.94003	-0.249965
1-linoleoylglycerol (1-monolinolein)	-2.8784	0.00126552	0.00746218	-1.0569	-1.49003	-0.689993
stearate, methyl ester	-1.33842	0.00126552	0.00746218	-0.210009	-0.729914	-0.139979
2-palmitoylglycerophosphocholine*	-1.30772	0.00144387	0.0083611	-0.579998	-1.14004	-0.269955
histidylleucine	-2.31373	0.00145056	0.0083611	-2.85	-6.16	-1.22
1-arachidonoylglycerophosphoinositol*	-2.26156	0.00163031	0.00887856	-0.725988	-1.58998	-0.570066
nicotinamide adenine dinucleotide (NAD+)	2.9719	0.00163031	0.00887856	2.6589	0.940011	4.31998
aspartylleucine	-2.76029	0.00163807	0.00887856	-2.10823	-3.77998	-0.430008
phenylalanylglycine	-2.42153	0.00163807	0.00887856	-2.49915	-4.81995	-0.509998
glutathione, reduced (GSH)	3.81227	0.00165366	0.00887856	5.19152	2.03002	7.15997
histamine	2.08154	0.00165366	0.00887856	1.96515	0.900003	3.50005
glutamate, gamma-methyl ester	2.221	0.00166148	0.00887856	1.5849	0.650001	2.91993
N-acetylglycine	-1.08401	0.00173818	0.00919264	-0.617304	-0.990038	-0.280073
glutathione, oxidized (GSSG)	3.37641	0.00182228	0.00953907	2.23742	0.629949	5.87993
1-arachidonylglycerol	-1.79613	0.00210007	0.0104987	-0.725	-1.89	-0.23
alpha-tocopherol	-4.04996	0.00210007	0.0104987	-3.38	-8.14	-0.93
glycylvaline	-1.2126	0.00210007	0.0104987	-0.52	-1.32	-0.28
nicotinamide adenine dinucleotide reduced (NADH)	5.18041	0.0021513	0.0104987	14.8191	12.7	22.88
adenosine 5'diphosphoribose	2.30769	0.0021604	0.0104987	3.50348	1.78003	5.98992
xylulose	-1.6642	0.0021604	0.0104987	-1.61686	-2.26999	-0.569988
adenosine 2'-monophosphate (2'-AMP)	-1.81496	0.00217997	0.0104987	-0.725915	-1.29995	-0.389922
beta-alanine	-3.23834	0.00218979	0.0104987	-4.54334	-7.81998	-0.650053
tryptophan betaine	-1.8953	0.00218979	0.0104987	-2.12139	-3.34994	-0.819985
Ac-Ser-Asp-Lys-Pro-OH	-2.05276	0.00246435	0.0115173	-1.40996	-3.66993	-0.360089
isovalerylcarnitine	1.42813	0.00246435	0.0115173	0.592666	0.25004	1.33997
arginylphenylalanine	-1.8162	0.00246959	0.0115173	-0.639977	-1.08997	-0.300039
2-oleoylglycerophosphocholine*	-2.30672	0.0028073	0.0129696	-0.451087	-1.27998	-0.120032
mead acid (20:3n9)	-2.76186	0.00283157	0.0129696	-1.14831	-1.51996	-0.749949
myristoleate (14:1n5)	-1.59047	0.00286821	0.0130212	-0.836776	-1.62005	-0.260058
N-acetylneuraminate	-1.81873	0.00298772	0.0134448	-1.12	-2.45	-0.44
histidine	-1.08204	0.00326132	0.0144832	-0.537823	-0.769976	-0.230015
1-oleoylplasmenylethanolamine*	-2.44244	0.00327495	0.0144832	-0.927564	-2.60001	-0.229968
N-acetylarginine	-3.80035	0.003451	0.014877	-1.78129	-6.28008	-9.77368e-05
N-acetyltyrosine	-2.13093	0.003451	0.014877	-0.579982	-0.880083	-5.59191e-05
palmitate, methyl ester	-3.62644	0.003451	0.014877	-0.452781	-1.01006	-8.50885e-05
glucarate (saccharate)	-2.46316	0.00359859	0.0152568	-1.17124	-2.54992	-0.230051
malonylcarnitine	-1.44968	0.00359859	0.0152568	-0.669991	-0.889992	-0.269953
1-oleoylglycerol (1-monoolein)	-2.63227	0.00367323	0.0154456	-1.27996	-1.51997	-0.68
valyllysine	-1.36737	0.00371845	0.0155086	-0.792719	-1.25995	-0.36005
7-alpha-hydroxycholesterol	-6.17165	0.00381451	0.0157256	-1.02003	-4.01	-0.329941
N-acetylleucine	-2.752	0.00383178	0.0157256	-1.14686	-2.26006	-0.219992
3-indoxyl sulfate	1.70939	0.00413518	0.0167035	1.255	0.41	3.11
inosine	-1.0735	0.00413518	0.0167035	-0.875	-1.42	-0.2
ophthalmate	2.19892	0.00448381	0.0179703	1.13997	0.500043	3.01997
glycylthreonine	-1.44515	0.00466427	0.0184915	-0.679992	-0.910055	-0.110043
mannose-6-phosphate	-2.12347	0.00477448	0.0184915	-4.08761	-5.00999	-0.970034
tryptophylglycine	-1.15618	0.00480669	0.0184915	-0.483626	-0.989949	-0.210085
1-palmitoylplasmenylethanolamine*	-1.99834	0.00483013	0.0184915	-0.758426	-1.37995	-0.240012
2-hydroxystearate	-1.30472	0.00483013	0.0184915	-0.804588	-1.67998	-0.300009
xanthine	-1.05829	0.00483013	0.0184915	-0.610269	-0.940046	-0.190004
beta-tocopherol	-4.18098	0.00502589	0.0190984	-1.8046	-4.17001	-0.279962
aspartate-glutamate	-2.01517	0.00511733	0.0193029	-0.649958	-1.11999	-0.0900401
adenosine 3'-monophosphate (3'-AMP)	-1.48359	0.00546535	0.0204651	-0.480453	-0.829959	-0.0799384
1-oleoylglycerophosphocholine (18:1)	-1.69385	0.00567235	0.0207851	-0.665	-1.33	-0.17
methionine	-1.11963	0.00567235	0.0207851	-0.6	-0.98	-0.2
N-acetylmethionine	-0.604574	0.00567235	0.0207851	-1.325	-2.02	-0.56
tyrosylglutamine	-1.40798	0.00609753	0.0221167	-1.41918	-1.75002	-0.270022
guanine	2.52356	0.00614252	0.0221167	2.22573	0.379988	6.43005
citrulline	0.916131	0.00616508	0.0221167	0.680045	0.300029	1.50006
1-stearoylglycerophosphoglycerol	-2.83655	0.00677853	0.023982	-0.8363	-1.55995	-0.370036
aspartylphenylalanine	-2.27029	0.00677853	0.023982	-1.37992	-2.66996	-0.200085
glycylproline	-1.23882	0.00702575	0.0246864	-1.42056	-2.53004	-0.479969
palmitoylcarnitine	1.81485	0.00762086	0.0264156	1.48	0.22	2.72
ribulose	-1.34276	0.00762086	0.0264156	-1.795	-2.38	-0.42
phenylalanylleucine	-2.30217	0.00769129	0.0264363	-1.2	-4.97996	-0.280009
gamma-glutamylmethionine	1.01549	0.00785402	0.0264363	0.63001	0.300044	1.30998
leucine	-0.879806	0.00785402	0.0264363	-0.598195	-0.959958	-0.190066
2-arachidonoyl glycerol	-1.92884	0.00790149	0.0264363	-0.779954	-2.58991	-0.169956
phenylalanine	-1.03187	0.00793605	0.0264363	-0.666322	-1.02999	-0.270084
tyrosine	-1.01697	0.00793605	0.0264363	-0.62977	-0.849923	-0.270066
7-beta-hydroxycholesterol	-3.6459	0.00829063	0.0274393	-0.900066	-2.30995	-0.260022
valylhistidine	-1.1911	0.0086821	0.0283376	-0.517734	-0.979958	-0.0899983
2'-deoxyguanosine	-2.10224	0.00872775	0.0283376	-0.690352	-1.69004	0
N-acetylvaline	-1.38303	0.00872775	0.0283376	-0.454743	-0.760073	0
pyrophosphate (PPi)	1.85088	0.00892055	0.0283435	1.98651	0.570051	2.76995
valine	-0.690006	0.00892055	0.0283435	-0.39701	-0.689942	-0.110041
cis-aconitate	-1.57484	0.00895059	0.0283435	-1.33522	-3.45001	-0.26001
guanosine 5'-diphospho-fucose	1.16022	0.00895059	0.0283435	1.22472	0.430069	1.71009
phenylalanylaspartate	-1.75668	0.00946387	0.029785	-0.860037	-3.14999	-0.279909
isoleucylarginine	-1.2564	0.00958796	0.0299916	-0.400509	-1.29992	-5.79682e-05
1-palmitoylglycerophosphoinositol*	-1.47019	0.0100794	0.0309396	-0.58395	-1.09005	-0.159954
oleoylcarnitine	2.14258	0.0100794	0.0309396	2.20942	0.56004	4.49001
1-palmitoylglycerophosphoethanolamine	-1.94914	0.0101323	0.0309396	-0.725	-1.61	-0.15
adenosine 5'-monophosphate (AMP)	1.41827	0.0101323	0.0309396	2.83	0.57	4.06
2-palmitoylglycerophosphoethanolamine*	-1.50595	0.0108837	0.0330374	-0.33998	-0.589984	-1.6909e-05
nicotinamide ribonucleotide (NMN)	-3.71495	0.0122862	0.0370753	-0.329838	-2.69008	-3.9147e-06
leucylarginine	-1.48069	0.0124384	0.0372989	-0.435196	-1.65	-5.79378e-05
asparagylleucine	-2.46634	0.0126065	0.0372989	-1.4649	-5.53998	-0.460014
1-palmitoylglycerophosphocholine (16:0)	-0.956218	0.0126847	0.0372989	-0.510073	-0.93005	-0.0900077
4-methylcatechol sulfate	1.0217	0.0126847	0.0372989	1.14335	0.259991	2.46992
gamma-glutamylglutamate	1.06271	0.0127238	0.0372989	1.26984	0.39005	2.26992
2-hydroxypalmitate	-0.716492	0.0132716	0.038465	-0.49	-0.85	-0.07
glycerol	-1.25119	0.0132716	0.038465	-0.78	-1.2	-0.14
aspartyltryptophan	-1.47718	0.0138901	0.0398079	-0.629966	-0.869993	-2.0181e-05
galactose	-1.89074	0.0138901	0.0398079	-1.17999	-1.74004	-3.97006e-05
taurine	-1.44196	0.0159184	0.0453675	-0.942273	-1.88004	-0.160043
alanine	-1.25119	0.0172119	0.0477281	-0.69	-1.14	-0.15
cytidine 5'-monophosphate (5'-CMP)	-1.44688	0.0172119	0.0477281	-0.91	-2.59	-0.11
glucose	-1.47742	0.0172119	0.0477281	-1.915	-3.18	-0.22
glutamate	-0.805047	0.0172119	0.0477281	-0.65	-1.12	-0.12
nicotinamide	-0.889146	0.0172119	0.0477281	-0.535	-1	-0.1
1-oleoylglycerophosphoinositol*	-2.00165	0.0173929	0.0479709	-0.518329	-1.16996	-0.230023
isoleucylglutamine	-2.69827	0.0180993	0.049652	-0.930006	-2.19	-0.0500793
cysteine-glutathione disulfide	1.27723	0.0199102	0.0540419	1.96457	0.25996	3.37998
serine	-1.02765	0.0199102	0.0540419	-0.596934	-0.899968	-0.16996
N1-methylguanosine	-0.98989	0.0202268	0.0543263	-0.399988	-0.660017	-0.100047
tyrosylleucine	-2.03366	0.0202268	0.0543263	-1.42994	-4.28996	-0.0699418
2-palmitoleoylglycerophosphocholine*	-0.891066	0.0204868	0.0544546	-0.122737	-0.660017	0
thymine	-0.98597	0.0204868	0.0544546	-0.128187	-0.860011	0
palatinitol	1.95811	0.0212995	0.0563228	1.14153	1.63525e-05	2.45003
2-docosahexaenoylglycerophosphoethanolamine*	-2.10293	0.0217043	0.0570472	-0.412038	-0.929964	-3.67185e-05
carnitine	-0.695769	0.0220182	0.0570472	-0.515	-0.9	-0.09
fructose	2.43431	0.0220182	0.0570472	14.445	1.12	23.92
hypoxanthine	-0.69928	0.0220182	0.0570472	-0.435	-0.74	-0.04
leucylthreonine	-1.70867	0.0221845	0.0571892	-1.17088	-3.31008	-0.129986
N2-acetyllysine	-5.08984	0.0250782	0.0643256	-1.61968	-7.17996	-5.20391e-05
1-dihomo-linoleoylglycerophosphocholine (20:2n6)*	1.35755	0.0256037	0.0653467	8.53902e-05	0	0.430055
malate	-2.14546	0.0273506	0.0691176	-0.907299	-1.49999	-0.0699714
phosphate	-0.494416	0.0273506	0.0691176	-0.34001	-0.549978	-0.0700102
serylphenyalanine	-1.83926	0.0279287	0.0702325	-1.22	-4.71	-0.25
phenylalanylglutamate	-2.29431	0.0290395	0.0726697	-1.24514	-4.66	-6.40011e-05
phenylalanylalanine	-2.67377	0.0301951	0.0751945	-0.970044	-14.81	-0.119973
1-stearoylplasmenylethanolamine*	-2.65146	0.0310642	0.0769852	-0.520049	-2.42999	-4.80372e-05
alanylglycine	-1.21005	0.033685	0.0813829	-0.689193	-1.34001	-0.0100408
lysine	-0.681627	0.033685	0.0813829	-0.420882	-0.820068	-0.0399692
urea	1.08324	0.033685	0.0813829	0.633889	0.0399817	1.62001
guanosine 3'-monophosphate (3'-GMP)	-0.553026	0.0337906	0.0813829	-0.0600119	-0.319997	8.92226e-06
prolylglycine	-0.757445	0.0337906	0.0813829	-0.0800238	-0.489989	1.91795e-05
valyltryptophan	-2.84507	0.0337906	0.0813829	-0.250015	-6.48004	9.345e-05
valylasparagine	-1.68804	0.0340967	0.0817366	-0.270024	-1.22998	-3.19992e-05
octanoylcarnitine	1.48663	0.0343669	0.081815	0.65001	4.44505e-05	1.70002
xanthosine	-1.18568	0.0344484	0.081815	-0.43287	-0.789997	-4.79753e-06
asparagine	-0.711751	0.0349867	0.0827105	-0.59	-1.21	-0.17
N-acetylalanine	-0.499242	0.037253	0.0876643	-0.33367	-0.659944	-0.0399786
leucylhistidine	-1.81991	0.0378376	0.0886332	-0.610038	-1.83004	1.25023e-05
arginine	-0.563287	0.0411379	0.0959261	-0.388475	-0.630033	-0.0199983
deoxycarnitine	0.835736	0.0434736	0.0995622	0.615	0.01	1.35
hexanoylcarnitine	1.32697	0.0434736	0.0995622	1.42	0.09	2.41
hydroxybutyrylcarnitine*	-0.97023	0.0434736	0.0995622	-0.84	-1.55	-0.02
phosphoethanolamine	0.597487	0.0434736	0.0995622	0.485	0.01	1.03
7-alpha-hydroxy-3-oxo-4-cholestenoate (7-Hoca)	-1.4866	0.0445108	0.100736	-0.908729	-1.65001	-3.96603e-05
3-methylglutarylcarnitine (C6)	-4.22249	0.0448881	0.100736	-0.219982	-2.83008	-2.41399e-05
inosine 5'-monophosphate (IMP)	1.04285	0.0448881	0.100736	0.867327	0.0499783	1.96999
alanylvaline	-1.81494	0.045077	0.100736	-0.835062	-2.45997	-0.0399981
ribitol	3.27064	0.045077	0.100736	6.88153	1.83638e-05	10.79
glycerophosphorylcholine (GPC)	-1.78614	0.0453607	0.100736	-1.3692	-2.83999	-0.0700452
sorbitol 6-phosphate	3.58439	0.0453607	0.100736	15.3427	1.09001	30.85
isoleucine	-0.622688	0.0498425	0.10996	-0.372878	-0.669993	-7.03072e-05
uracil	-0.653483	0.049943	0.10996	-0.626274	-1.02001	7.48933e-05
catechol sulfate	2.01232	0.0534759	0.115752	0.695	-0.05	1.82
fumarate	-0.943526	0.0534759	0.115752	-0.455	-1.17	0.02
propionylcarnitine	-1.16233	0.0534759	0.115752	-0.47	-1.47	0.01
threonine	-0.803809	0.0534759	0.115752	-0.515	-0.85	0.05
inositol 1-phosphate (I1P)	-1.23068	0.0549073	0.116877	-0.414154	-1.04995	0.00998063
Isobar: fructose 1,6-diphosphate, glucose 1,6-diphosphate, myo-inositol 1,4 or 1,3-diphosphate	2.33661	0.0549073	0.116877	1.26996	-0.119967	6.39997
pantothenate	-0.646105	0.0549073	0.116877	-0.347866	-0.700046	0.0199755
sphingosine	-2.21531	0.0549073	0.116877	-0.529923	-2.98995	0.0199622
taurochenodeoxycholate	2.48599	0.0580286	0.123011	0.610647	-3.66288e-06	1.50995
glucose 1-phosphate	-0.440923	0.0620434	0.130981	-0.719997	-1.92	0.459963
2-stearoylglycerophosphocholine*	0.533566	0.0624297	0.131256	0.138821	-7.66857e-05	0.539962
pelargonate (9:0)	-0.514529	0.0648856	0.13498	-0.315846	-0.669987	3.99917e-05
2-aminobutyrate	-0.702715	0.0652536	0.13498	-0.4	-1.08	0.07
butyrylcarnitine	0.643641	0.0652536	0.13498	0.505	-0.1	1.14
succinate	-2.53392	0.0652536	0.13498	-2.35	-6.14	0.11
stearoylcarnitine	1.48014	0.065717	0.135339	0.650018	-0.0699662	2.72991
phenylalanylserine	-1.39867	0.0659548	0.135339	-1.38004	-3.33999	0.159983
2-eicosapentaenoylglycerophosphoethanolamine*	-1.02432	0.0671261	0.13665	-5.12085e-05	-0.520036	7.94834e-05
6-keto prostaglandin F1alpha	-1.69442	0.0671261	0.13665	-1.1642e-05	-0.770018	7.01108e-05
ascorbate (Vitamin C)	1.19393	0.0721976	0.145816	1.10019	-0.0100069	1.86997
flavin adenine dinucleotide (FAD)	-0.690057	0.0721976	0.145816	-0.373009	-0.669965	0.0999951
4-guanidinobutanoate	-1.12977	0.0745778	0.150033	-0.550037	-1.44002	1.00833e-05
taurocholate	2.93279	0.0785459	0.155967	0.650035	-4.38414e-05	2.50004
ergothioneine	-1.08364	0.0788932	0.155967	-0.765	-1.81	0.08
glycine	-0.641818	0.0788932	0.155967	-0.455	-0.74	0.09
hypotaurine	-1.32678	0.0790478	0.155967	-0.819613	-2.36997	0.109971
mannose	-1.2714	0.0790478	0.155967	-0.794639	-2.46996	0.119939
2-docosapentaenoylglycerophosphoethanolamine*	-1.08229	0.0832976	0.163723	-4.5184e-05	-1.52	3.12852e-05
N-acetylglutamine	-2.18517	0.0857209	0.166383	-3.15543	-5.17996	0.130013
fucose	-1.09862	0.086069	0.166383	-0.55856	-1.27001	2.01903e-05
glycerol 3-phosphate (G3P)	-0.868722	0.0862728	0.166383	-0.483675	-1.21003	0.0300411
myo-inositol	0.775529	0.0862728	0.166383	0.451819	-0.0300341	1.11
sarcosine (N-Methylglycine)	-1.11177	0.0862728	0.166383	-1.29742	-2.34009	0.190006
2-linoleoylglycerophosphoethanolamine*	-1.20929	0.0891084	0.171208	-0.377155	-1.23999	4.37982e-05
N6-acetyllysine	-0.464668	0.092675	0.177397	-0.129985	-0.489966	8.05549e-05
erythritol	1.99057	0.0947195	0.179967	2.535	-0.22	6.23
kynurenine	-1.48834	0.0947195	0.179967	-1.655	-8.03	0.15
anserine	0.909348	0.102292	0.19157	3.06923e-05	-6.94158e-05	0.580027
hydroxyisovaleroyl carnitine	-0.943526	0.10232	0.19157	-0.40721	-0.950073	0.050047
serylmethionine	-1.21302	0.10232	0.19157	-0.71908	-1.84005	0.21005
valylalanine	-2.03546	0.10232	0.19157	-1.00344	-3.08005	0.0900531
VGAHAGEYGAEALER*	-1.39583	0.110113	0.204991	-0.130068	-1.05996	5.40545e-05
valylarginine	-1.10253	0.110287	0.204991	-0.509966	-1.09993	6.42602e-05
gamma-aminobutyrate (GABA)	-0.875533	0.112754	0.206582	-0.46	-0.93	0.1
S-adenosylhomocysteine (SAH)	-0.83667	0.112754	0.206582	-1.04	-2.06	0.28
threonate	-0.765176	0.112754	0.206582	-0.55	-2.9	0.24
valylthreonine	-1.49918	0.112754	0.206582	-1.01	-2.1	0.11
adenosine 5'-triphosphate (ATP)	3.58919	0.11509	0.210111	4.49336	-0.0499351	7.91
phenylalanylisoleucine	-1.0994	0.119024	0.216523	-0.442141	-1.34995	0.0999385
glycylisoleucine	-1.23096	0.120004	0.217182	-0.614856	-1.71999	0.0899657
lidocaine	-1.17609	0.120656	0.217182	-0.597456	-1.40993	0.210049
methyl-alpha-glucopyranoside	-1.37544	0.120656	0.217182	-1.46525	-3.81001	0.470065
leucyltyrosine	-1.88166	0.126682	0.22723	-3.14636e-05	-1.31002	4.30749e-05
valylvaline	-1.74799	0.127522	0.22794	-0.460051	-3.52998	0.129941
isoleucylthreonine	-1.88633	0.129219	0.230172	-0.829937	-2.04999	0.0799799
Isobar: ribulose 5-phosphate, xylulose 5-phosphate	-0.807897	0.130742	0.232079	-0.893881	-1.89995	0.249987
acetylcarnitine	0.738104	0.1333	0.233389	0.74	-0.14	1.69
alanylphenylalanine	-1.45374	0.1333	0.233389	-0.53	-3.66	0.18
oxalate (ethanedioate)	0.263745	0.1333	0.233389	0.405	-0.14	0.96
phenol sulfate	0.537385	0.1333	0.233389	0.365	-0.19	0.87
valylmethionine	-2.35853	0.135316	0.236112	-0.480041	-7.19994	0.259988
leucylalanine	-1.48443	0.152321	0.264034	-0.55998	-3.90996	0.129986
gamma-glutamylglutamine	0.700609	0.152681	0.264034	0.600065	-0.069991	1.29007
aspartate	-0.891679	0.152862	0.264034	-0.42067	-1.16996	0.189954
pivaloylcarnitine	-0.515485	0.15437	0.265744	0.219951	-2.46744e-05	0.519953
2-oleoylglycerol (2-monoolein)	-2.55582	0.15503	0.265989	-1.08294e-05	-2.01002	2.3997e-05
creatinine	0.251539	0.156401	0.266557	0.17	-0.14	0.46
fructose 1-phosphate	-1.42812	0.156401	0.266557	-1.515	-4.74	1.08
valylaspartate	-1.48276	0.158582	0.26938	-0.609974	-1.87997	0.040045
4-androsten-3beta,17beta-diol disulfate 1*	0.502273	0.163266	0.27642	0.312594	-0.139926	0.810016
4-hydroxybutyrate (GHB)	-2.51817	0.164938	0.278333	-2.77179	-8.97004	0.50001
glucuronate	-0.690117	0.171164	0.286996	-0.179975	-0.390007	4.14811e-05
threitol	2.46223	0.17119	0.286996	0.43778	-0.080039	1.80001
isoleucyltyrosine	-1.749	0.174667	0.29187	-0.150139	-3.92999	0.0799778
N1-methyladenosine	-0.333424	0.175619	0.292509	-0.191168	-0.46997	0.0700616
isoleucylalanine	-2.11056	0.177148	0.2941	-1.02001	-3.55998	0.169954
glutamine-leucine	-2.38746	0.180914	0.299384	-0.528861	-8.66995	2.66144e-05
lauryl sulfate	-2.86023	0.191224	0.315427	-3.48357	-8.91	0.130033
4-hydroxyphenylacetate	-0.174153	0.192976	0.316283	0	-8.21473e-05	0
guanidinoacetate	-0.114783	0.192976	0.316283	0	-8.09101e-05	0
ribose	-0.387775	0.204671	0.332509	-0.814211	-1.91	0.269985
adipate	-1.2251	0.204871	0.332509	-0.341816	-1.10001	0.199956
1-stearoylglycerophosphocholine (18:0)	0.758484	0.205468	0.332509	0.220077	-0.239976	1.06
alanylleucine	-1.87566	0.205468	0.332509	-0.506171	-5.24002	0.410072
1,5-anhydroglucitol (1,5-AG)	0.632318	0.211024	0.338298	0.415	-0.26	1.32
N-acetylthreonine	-0.473148	0.211024	0.338298	-0.25	-0.69	0.13
serylleucine	-2.57064	0.211024	0.338298	-1.215	-8.88	0.5
arginylisoleucine	-0.6142	0.213503	0.340146	-0.37846	-0.630018	0.03996
glycylphenylalanine	-1.17066	0.213503	0.340146	-1.16398	-2.07996	0.100055
valylserine	-1.86805	0.218436	0.346928	-0.961138	-2.59	0.209972
cytidine-3'-monophosphate (3'-CMP)	-1.0066	0.225772	0.357473	-4.93827e-05	-0.659923	3.17941e-05
allantoin	-2.54604	0.233302	0.368258	-0.106587	-0.730059	2.25687e-05
tyrosylvaline	-1.03463	0.234382	0.368361	-0.447731	-2.06	0.309956
leucylglutamate	-1.58511	0.236033	0.368361	-0.424628	-4.43002	0.280009
urate	0.507505	0.236033	0.368361	0.340016	-0.16997	0.789929
xylitol	1.57822	0.236239	0.368361	0.675693	-0.29997	1.93994
Isobar: UDP-acetylglucosamine, UDP-acetylgalactosamine	0.442476	0.242807	0.376314	0.665	-0.59	1.31
methylphosphate	0.509845	0.242807	0.376314	0.43	-0.24	1.02
paraxanthine	0.52361	0.243895	0.376861	0.0500855	-0.0399391	0.33004
cysteine	-1.484	0.252582	0.389114	-0.569978	-7.48995	0.399955
ethanolamine	-0.483795	0.269924	0.412437	-0.370089	-0.909966	0.299952
hippurate	-0.83857	0.270134	0.412437	0.205403	-0.459954	1.18998
isobutyrylcarnitine	0.181674	0.270134	0.412437	0.182802	-0.26999	0.559964
kynurenate	0.203463	0.27683	0.418717	2.50527e-05	-9.69971e-07	0.0300364
phenylalanylvaline	-1.1675	0.27683	0.418717	-4.40467e-05	-1.03997	1.58049e-05
guanosine	-0.691365	0.277512	0.418717	-0.51	-1.83	0.41
pyroglutamine*	-1.43028	0.277512	0.418717	-0.525	-2.29	0.3
pyridoxate	0.344648	0.280593	0.421467	0.010044	-0.0399959	0.339947
isoleucylvaline	-1.87233	0.280978	0.421467	-0.320063	-4.44995	0.109959
arginylleucine	-1.33718	0.288064	0.426183	-0.4134	-4.01996	0.489985
acisoga	0.383684	0.288276	0.426183	0.22218	-0.100066	0.649996
C-glycosyltryptophan*	-0.410707	0.288276	0.426183	-0.191332	-0.72004	0.250001
maltose	-0.599355	0.288276	0.426183	-0.608263	-2.20001	1.05007
spermidine	-0.331439	0.288276	0.426183	-0.425791	-1.00001	0.470045
3-hydroxyhippurate	0.572709	0.298749	0.440398	4.83739e-05	-5.76235e-05	0.340074
6-phosphogluconate	0.365238	0.299895	0.44082	0.560055	-0.619964	1.78998
gamma-glutamylisoleucine*	-0.375337	0.302938	0.444021	-0.15999	-0.710013	0.249958
3-phosphoglycerate	-0.632477	0.315378	0.459628	-0.27	-1.06	0.44
xylonate	-0.351869	0.315378	0.459628	-0.33	-0.84	0.28
4-acetamidobutanoate	0.269786	0.320871	0.466309	0.0392036	-0.0600599	0.430014
arabonate	-0.425594	0.326124	0.472603	-0.270012	-0.870022	0.209945
quinolinate	-0.205334	0.330555	0.477675	-5.58923e-05	-0.0299909	1.87237e-05
N2-methylguanosine	-0.263034	0.340004	0.488891	-0.177819	-0.270026	0.10998
vecuronium	0.541085	0.340222	0.488891	0.36049	-0.410028	0.919961
N-acetylcarnosine	0.230006	0.342782	0.489148	0	0	8.43432e-05
spermine	0.415037	0.342782	0.489148	0	0	8.42279e-05
serylvaline	-1.5624	0.343261	0.489148	-0.595543	-2.01996	0.240008
valyltyrosine	-1.01519	0.347534	0.493864	-0.260052	-2.91993	0.369988
choline phosphate	0.301504	0.356232	0.503435	0.19	-0.43	0.89
valylglutamine	-1.40157	0.356232	0.503435	-0.525	-2.26	0.41
3-carboxy-4-methyl-5-propyl-2-furanpropanoate (CMPF)	0.365018	0.368687	0.518478	0.675399	-0.510016	4.74993
betaine	-0.500562	0.368898	0.518478	-0.276124	-1.19003	0.480049
N-delta-acetylornithine*	0.506311	0.383652	0.537742	0.226402	-0.480043	1.00994
piperine	0.216394	0.389179	0.541621	0.213136	-0.349982	0.909932
seryltyrosine	-1.25327	0.389599	0.541621	-0.820861	-2.68991	0.499988
proline	-0.287866	0.390435	0.541621	-0.086563	-0.469954	0.189953
triethyleneglycol	-0.137263	0.390643	0.541621	-0.141887	-0.949943	0.359987
cholate	0.391712	0.395867	0.545935	1.44873e-05	-4.0041e-05	1.05996
celecoxib	-0.0352285	0.399075	0.545935	0	-6.5257e-05	0
hydrochlorothiazide	-0.0117293	0.399075	0.545935	0	-9.49193e-05	0
hydroxypioglitazone (M-IV)	-0.1127	0.399075	0.545935	0	-7.71219e-05	0
squalene	-0.0166787	0.399075	0.545935	0	-5.93245e-05	0
heme	1.37383	0.40692	0.555185	0.253084	-0.269956	4.28996
leucylleucine	-1.80735	0.412158	0.560841	-0.351744	-7.40996	0.289915
N-ethylglycinexylidide*	-1.57908	0.433882	0.588839	-0.384185	-1.79998	0.279942
isoleucylserine	-1.95586	0.435923	0.5894	-0.38678	-4.46996	0.569951
caprate (10:0)	-0.180631	0.437541	0.5894	-0.135605	-0.400011	0.230013
phenylacetylglutamine	-0.328576	0.437742	0.5894	-0.106691	-0.760019	0.380085
glycerophosphoethanolamine	-0.474414	0.445157	0.597815	-0.256675	-0.609968	0.209954
pentaethylene glycol	0.171802	0.446968	0.59868	-0.145	-0.59	1.1
p-cresol sulfate	0.509469	0.462236	0.615915	0.292142	-0.370026	1.07001
tetraethylene glycol	-0.076914	0.462236	0.615915	-0.142357	-0.630026	0.480012
caproate (6:0)	-1.02554	0.479996	0.637922	-4.35448e-05	-0.559948	0.119995
alanylisoleucine	-0.732778	0.485556	0.64275	-0.218869	-1.24999	0.310027
pro-hydroxy-pro	-0.219394	0.486134	0.64275	-0.0852609	-0.419999	0.199985
1-margaroylglycerophosphocholine (17:0)	0.580846	0.493559	0.646716	4.07757e-05	-9.58721e-06	0.280067
caffeine	0.45591	0.493559	0.646716	1.70914e-05	-5.72525e-05	0.0300214
prostaglandin E2	0.887342	0.493559	0.646716	4.12856e-05	-3.76268e-05	0.300019
5-methylthioadenosine (MTA)	-1.20764	0.496698	0.646716	-0.3	-3.43	0.68
adenine	-0.523579	0.496698	0.646716	-0.175	-0.78	0.42
putrescine	-0.625604	0.496698	0.646716	-0.5	-2.85	1.11
theobromine	0.790264	0.511585	0.660143	0.0399526	-0.159995	1.1
dimethylglycine	-0.261591	0.513259	0.660143	-0.174531	-0.620012	0.279974
scyllo-inositol	-0.672026	0.513259	0.660143	-0.0899386	-0.770065	0.230008
gluconate	0.219358	0.513444	0.660143	-0.0992631	-0.440026	0.640038
S-methylcysteine	-0.655067	0.513444	0.660143	-0.189192	-1.15003	0.290059
3'-dephosphocoenzyme A	-0.864117	0.527391	0.674156	-3.03364e-05	-0.459972	3.12716e-05
phenylalanyltyrosine	-0.50323	0.527391	0.674156	-1.36671e-05	-1.16995	2.70266e-05
isoleucylphenylalanine	-2.00372	0.53001	0.674156	-0.0799357	-4.50993	0.209927
valylphenylalanine	-1.89894	0.53376	0.674156	-0.0400091	-7.57996	0.460014
pipecolate	0.278284	0.538504	0.674156	0.138907	-0.620012	1.04005
arabitol	1.00057	0.538864	0.674156	0.311467	-0.239945	1.13997
adenylosuccinate	-1.4634	0.539579	0.674156	-0.328307	-2.84994	0.279988
cystine	-1.23092	0.539754	0.674156	-2.06839e-05	-0.889985	2.14076e-05
phenylcarnitine*	-2.39694	0.539754	0.674156	-1.01321e-05	-0.46994	8.64392e-05
trans-4-hydroxyproline	0.242986	0.539936	0.674156	0.160002	-0.48001	0.710078
erythronate*	-0.838094	0.540114	0.674156	-0.490608	-1.38998	0.319979
valylleucine	-2.27949	0.540114	0.674156	-0.241581	-7.73999	0.319939
2-hydroxybutyrate (AHB)	0.278601	0.548962	0.681882	0.105	-0.43	0.94
cytidine 5'-diphosphocholine	0.360329	0.548962	0.681882	0.57	-1.57	3.36
3-methyl-2-oxovalerate	0.405848	0.562368	0.696848	2.03874e-05	-4.25162e-05	0.0500487
5-oxoproline	-0.283509	0.567288	0.699775	0.1015	-0.519958	0.609974
glycylleucine	-0.277006	0.567459	0.699775	-0.175055	-0.850006	0.500006
N2,N2-dimethylguanosine	-0.200929	0.581341	0.715175	-2.01241e-05	-0.300058	0.169941
threonylphenylalanine	-2.34035	0.593988	0.725571	-0.250674	-10.1099	0.589965
asparagylisoleucine	-1.33521	0.594964	0.725571	-0.158936	-1.59998	0.449961
pseudouridine	-0.130931	0.594964	0.725571	-0.0535275	-0.319975	0.189994
pentadecanoate (15:0)	0.373409	0.595449	0.725571	-0.1725	-0.689985	1.19992
N2-(3-cyclopentylpropanoyl)glutamine	-0.326651	0.598429	0.727474	-2.51857e-05	-0.0199466	4.36641e-05
3-dehydrocarnitine*	0.693068	0.60378	0.730517	0.1	-0.34	1.03
maltotetraose	-0.507436	0.60378	0.730517	1.42	-7.15	2.86
dehydroascorbate	-0.0499	0.607149	0.731144	6.6857e-05	-3.28637e-05	6.6202e-05
prostaglandin A2	-0.257343	0.607149	0.731144	9.40931e-05	-1.4538e-05	2.36993e-05
bilirubin (Z,Z)	1.21098	0.617152	0.741449	2.79608e-05	-0.390084	1.72009
acetylcholine	1.36345	0.618769	0.741655	0.0299949	-0.430042	1.00003
guanosine 5'- monophosphate (5'-GMP)	-0.051261	0.623902	0.746064	-0.190055	-0.839996	0.809968
glycolithocholate sulfate*	0.050619	0.637155	0.760141	3.03594e-05	-0.0600346	0.189983
trigonelline (N'-methylnicotinate)	0.431595	0.650356	0.770369	0.0797697	-0.579964	0.620078
cysteinylglycine	-1.44147	0.650502	0.770369	0.220188	-2.20999	1.88993
maltohexaose	-0.878849	0.650502	0.770369	-0.0746971	-2.48997	0.349986
mannitol	1.72647	0.652809	0.770369	0.815174	-0.289958	13.12
creatine	-0.0324215	0.653237	0.770369	-0.142294	-1.38995	1.45002
2-eicosatrienoylglycerophosphocholine*	-0.19592	0.658892	0.775256	-3.45485e-05	-0.299979	0.139957
pseudoephedrine	-0.790942	0.673515	0.790648	-2.2126e-05	-0.199939	2.40088e-05
N6-carbamoylthreonyladenosine	-0.621032	0.678388	0.794551	0.0300199	-0.459945	0.279966
indolelactate	0.170722	0.681769	0.796691	0.0467789	-0.479984	0.759969
isoleucylisoleucine	-1.02238	0.702641	0.819216	3.60134e-05	-4.86994	0.620036
valerylcarnitine	-0.561482	0.712821	0.827744	0.0571886	-0.869949	0.55998
2-aminoadipate	-0.420891	0.713183	0.827744	1.26935	-6.56994	3.35995
dehydroisoandrosterone sulfate (DHEA-S)	0.764686	0.737446	0.853972	-4.6751e-05	-0.409986	0.729949
tryptophan	-0.422008	0.743754	0.857532	-0.18123	-0.809951	0.429937
3-hydroxybutyrate (BHBA)	0.364637	0.743863	0.857532	0.095839	-0.620044	1.45003
maltopentaose	-0.57264	0.774666	0.889378	0.145116	-3.43	1.03994
androsterone sulfate	0.0598849	0.774955	0.889378	0.139976	-0.730033	0.779976
1-palmitoleoylglycerophosphocholine (16:1)*	-0.0138855	0.799012	0.914941	-3.00145e-05	-0.299973	0.450028
dimethylarginine (SDMA + ADMA)	-0.198993	0.806329	0.915243	-0.0343913	-0.530023	0.199952
2-methylbutyrylcarnitine (C5)	-0.183808	0.806413	0.915243	0.0711334	-0.359942	0.430046
leucylglycine	-1.52109	0.806413	0.915243	-0.129103	-2.72004	0.520025
stachydrine	0.312221	0.806413	0.915243	0.223917	-2.35007	2.15002
4-methyl-2-oxopentanoate	-0.227396	0.813557	0.921313	-2.11104e-05	-0.690017	0.429944
2-phosphoglycerate	-0.396934	0.835678	0.935065	-1.76223e-05	-0.999944	0.659955
erythrulose	1.39451	0.837552	0.935065	-0.0516304	-1.28993	1.43004
azelate (nonanedioate)	0.477059	0.837976	0.935065	0.0439512	-0.640019	1.03998
16-hydroxypalmitate	0.0161569	0.838186	0.935065	-0.0550429	-0.369949	0.379989
1-linoleoylglycerophosphocholine (18:2n6)	-0.582053	0.842105	0.935065	0.07	-0.6	0.59
hexaethylene glycol	0.377268	0.842105	0.935065	-0.095	-0.63	1.39
maltotriose	-0.27496	0.842105	0.935065	0.15	-2.92	0.8
ornithine	0.102354	0.842105	0.935065	-0.075	-0.73	0.6
valylglutamate	-0.158165	0.842105	0.935065	-0.125	-1.24	0.98
gulono-1,4-lactone	-0.0027195	0.869772	0.955945	-0.00101183	-0.299929	0.359981
3-(4-hydroxyphenyl)lactate	-0.0376581	0.87017	0.955945	0.0879199	-0.670012	0.760002
5,6-dihydrouracil	-0.172432	0.870226	0.955945	0.0969573	-0.630013	0.700038
lactate	-0.073339	0.870226	0.955945	-0.051743	-0.579948	0.469951
uridine monophosphate (5' or 3')	-0.0136935	0.870226	0.955945	0.196086	-1.72001	1.61004
5-methyltetrahydrofolate (5MeTHF)	0.805731	0.90005	0.974679	6.41028e-05	-0.409932	0.27991
isoleucylleucine	-2.31233	0.901661	0.974679	6.58586e-06	-11.6399	0.729952
leucylasparagine	-0.896325	0.901661	0.974679	-1.24847e-05	-2.38994	0.579989
phytosphingosine	-0.227701	0.902052	0.974679	0.00623885	-0.52007	0.270014
3-methoxytyrosine	0.50291	0.90231	0.974679	-0.0399206	-0.469991	0.360083
alpha-hydroxyisovalerate	-0.166388	0.902353	0.974679	-0.107936	-0.779945	0.579946
leucylserine	-1.21752	0.902353	0.974679	0.0451045	-4.27997	1.09997
1,2-propanediol	-0.194116	0.902481	0.974679	-0.0588522	-0.40996	0.419978
gamma-glutamylleucine	-0.330992	0.904826	0.975159	-0.035	-0.6	0.42
phosphoenolpyruvate (PEP)	-1.00641	0.934725	0.999349	-0.0170964	-0.949954	0.360031
1,3-dihydroxyacetone	-0.0256522	0.934754	0.999349	-0.00214283	-0.829948	0.869979
gamma-glutamylphenylalanine	-0.0626537	0.934897	0.999349	0.0114227	-0.480049	0.430013
1-myristoylglycerophosphocholine (14:0)	0.0374912	0.938959	0.999349	1.52744e-06	-1.69468e-05	6.93658e-05
atenolol	0.142785	0.938959	0.999349	3.69087e-06	-1.67071e-05	1.94983e-05
prostaglandin B2	0.0281136	0.938959	0.999349	9.97339e-06	-8.68308e-05	9.03021e-05
4-hydroxyhippurate	-0.371244	0.954358	1	7.47218e-05	-1.47176e-06	2.47706e-05
5-aminovalerate	-0.0963261	0.967407	1	-0.0841713	-0.890019	0.660016
gamma-glutamylvaline	-0.213416	0.967407	1	-0.00758249	-0.600008	0.530014
glycerol 2-phosphate	0.255375	0.967421	1	0.0800183	-1.05005	1.43995
citrate	0.0852913	0.968239	1	0.05	-1.8	1.58
2-hydroxyglutarate	-0.271262	0.968239	1	-0.01	-1.48	1.54
1-myristoylglycerophosphoethanolamine	0	1	1
2-hydroxyacetaminophen sulfate*	0	1	1
2-methoxyacetaminophen sulfate*	0	1	1
2-stearoylglycerophosphoethanolamine*	-0.131266	1	1	2.0084e-05	-0.120025	0.300073
3-(cystein-S-yl)acetaminophen*	0	1	1
4-acetamidophenol	0	1	1
4-acetaminophen sulfate	0	1	1
caprylate (8:0)	-0.0489297	1	1	-5.0762e-06	-0.469914	0.439994
carboxyibuprofen	0	1	1
cytidine 5'-monophospho-N-acetylneuraminic acid	0	1	1
DSGEGDFXAEGGGVR*	0	1	1
erythrose-4-phosphate	0	1	1
glutarylcarnitine (C5)	-0.938394	1	1	-1.71873e-06	-1.71995	0.419977
heptaethylene glycol	0.583926	1	1	0.0291055	-0.38993	1.18994
L-methyldopa	0	1	1
linoleamide (18:2n6)	0	1	1
lipitor	0	1	1
metformin	0	1	1
methyl-beta-glucopyranoside	0	1	1
metoprolol	0	1	1
metoprolol acid metabolite*	0	1	1
octaethylene glycol	0.674759	1	1	0.00460298	-0.449982	1.45005
olanzapine	0	1	1
oxypurinol	0	1	1
warfarin	0	1	1
