# Supplementary material for: Abnormal oxidative metabolism in a quiet genomic background underlies clear cell papillary renal cell carcinoma
Source: eLife. 2019 Apr 1;8:e38986. doi: 10.7554/eLife.38986 (PMC6459676; doi:10.7554/eLife.38986)
Supplement: Figure 2—source data 2. [file elife-38986-fig2-data2.xlsx]

## Sheet: Sheet1
chemical_name	COMP_ID	PLATFORM	RI	MASS	CAS	KEGG	HMDB	PUBCHEM	SUPER_PATHWAY	SUB_PATHWAY
1,2-propanediol	38002	GC/MS	1041	117	57-55-6;	C00583	HMDB01881		Lipid	Ketone bodies
1,3-dihydroxyacetone	35963	GC/MS	1263	103	96-26-4;62147-49-3;	C00184	HMDB01882	670	Carbohydrate	Glycolysis, gluconeogenesis, pyruvate metabolism
1,5-anhydroglucitol (1,5-AG)	20675	GC/MS	1788.7	217.1	154-58-5;	C07326	HMDB02712		Carbohydrate	Glycolysis, gluconeogenesis, pyruvate metabolism
1-arachidonoylglycerophosphocholine (20:4n6)*	34061	LC/MS Neg	5900	618.1		C05208			Lipid	Lysolipid
1-arachidonoylglycerophosphoethanolamine*	35186	LC/MS Neg	5731	500.3			HMDB11517		Lipid	Lysolipid
1-arachidonoylglycerophosphoinositol*	34214	LC/MS Neg	5479	619.4					Lipid	Lysolipid
1-arachidonylglycerol	34397	LC/MS Neg	5937	303.4	35474-99-8;	C13857	HMDB11572	5282281	Lipid	Monoacylglycerol
1-dihomo-linoleoylglycerophosphocholine (20:2n6)*	33871	LC/MS Pos	5696	548.3					Lipid	Lysolipid
1-eicosatrienoylglycerophosphocholine (20:3)*	33821	LC/MS Neg	6000	620.2					Lipid	Lysolipid
1-eicosenoylglycerophosphoethanolamine (20:1n9)*	44628	LC/MS Neg	6243.8	506.5					Lipid	Lysolipid
1-linoleoylglycerol (1-monolinolein)	27447	GC/MS	2181	395.3	2277-28-3;			5283469	Lipid	Monoacylglycerol
1-linoleoylglycerophosphocholine (18:2n6)	34419	LC/MS Pos	5574	520.4		C04100		11988421	Lipid	Lysolipid
1-linoleoylglycerophosphoethanolamine*	32635	LC/MS Neg	5725	476.3			HMDB11507		Lipid	Lysolipid
1-linoleoylglycerophosphoserine*	43676	LC/MS Neg	5497.4	520.3					Lipid	Lysolipid
1-margaroylglycerophosphocholine (17:0)	33957	LC/MS Pos	5750	510.4	50930-23-9;		HMDB12108		Lipid	Lysolipid
1-margaroylglycerophosphoethanolamine*	37419	LC/MS Neg	6029	466.3					Lipid	Lysolipid
1-myristoylglycerophosphoethanolamine	35627	LC/MS Pos	5481	426.1			HMDB11500	9547070	Lipid	Lysolipid
1-oleoylglycerol (1-monoolein)	21184	GC/MS	2181.2	397.4	111-03-5;		HMDB11567	5283468	Lipid	Monoacylglycerol
1-oleoylglycerophosphocholine (18:1)	33960	LC/MS Neg	6120	596	19420-56-5;			16081932	Lipid	Lysolipid
1-oleoylglycerophosphoethanolamine	35628	LC/MS Neg	5928	478.3	89576-29-4;		HMDB11506	9547071	Lipid	Lysolipid
1-oleoylglycerophosphoinositol*	36602	LC/MS Neg	5577	597.4					Lipid	Lysolipid
1-oleoylglycerophosphoserine	19260	LC/MS Neg	5607	522.3				9547099	Lipid	Lysolipid
1-oleoylplasmenylethanolamine*	44621	LC/MS Neg	6105.2	462.5					Lipid	Lysolipid
1-palmitoleoylglycerophosphocholine (16:1)*	33230	LC/MS Pos	5524	494.3					Lipid	Lysolipid
1-palmitoylglycerol (1-monopalmitin)	21127	GC/MS	2119.5	371.3	542-44-9;			14900	Lipid	Monoacylglycerol
1-palmitoylglycerophosphocholine (16:0)	33955	LC/MS Neg	6046	570	17364-16-8;			86554	Lipid	Lysolipid
1-palmitoylglycerophosphoethanolamine	35631	LC/MS Neg	5940	452.3			HMDB11503	9547069	Lipid	Lysolipid
1-palmitoylglycerophosphoinositol*	35305	LC/MS Neg	5573	571.3					Lipid	Lysolipid
1-palmitoylplasmenylethanolamine*	39270	LC/MS Neg	6153	436.4					Lipid	Lysolipid
1-stearoylglycerol (1-monostearin)	21188	GC/MS	2186.6	399.4	123-94-4;31566-31-1;	D01947		24699	Lipid	Monoacylglycerol
1-stearoylglycerophosphocholine (18:0)	33961	LC/MS Pos	5844	524.4	19420-57-6;			497299	Lipid	Lysolipid
1-stearoylglycerophosphoethanolamine	34416	LC/MS Neg	6200	480.4	69747-55-3;		HMDB11130	9547068	Lipid	Lysolipid
1-stearoylglycerophosphoglycerol	34437	LC/MS Neg	5826	511.4					Lipid	Lysolipid
1-stearoylglycerophosphoinositol	19324	LC/MS Neg	5800	599.4	796963-93-4;				Lipid	Lysolipid
1-stearoylplasmenylethanolamine*	39271	LC/MS Neg	6500	464.4					Lipid	Lysolipid
10-heptadecenoate (17:1n7)	33971	LC/MS Neg	5558	267.3	29743-97-3;			5312435	Lipid	Long chain fatty acid
10-nonadecenoate (19:1n9)	33972	LC/MS Neg	5775	295.4	73033-09-7;			5312513	Lipid	Long chain fatty acid
13-HODE + 9-HODE	37752	LC/MS Neg	5270	295.2					Lipid	Fatty acid, monohydroxy
15-methylpalmitate (isobar with 2-methylpalmitate)	38768	LC/MS Neg	5698	269.4					Lipid	Fatty acid, branched
16-hydroxypalmitate	39609	LC/MS Neg	5232	271.3	506-13-8;	C18218		10466	Lipid	Fatty acid, monohydroxy
17-methylstearate	38296	LC/MS Neg	5987	297.4	2724-59-6;			3083779	Lipid	Fatty acid, branched
2'-deoxyguanosine	1411	LC/MS Neg	1759	266.2	961-07-9;	C00330	HMDB00085	187790	Nucleotide	Purine metabolism, guanine containing
2'-deoxyinosine	15076	LC/MS Neg	1700	251.1	890-38-0;	C05512	HMDB00071	65058	Nucleotide	Purine metabolism, (hypo)xanthine/inosine containing
2-aminoadipate	6146	GC/MS	1686.5	260.1	542-32-5;1118-90-7;	C00956	HMDB00510	469	Amino acid	Lysine metabolism
2-aminobutyrate	1577	GC/MS	1215.7	130	1492-24-6;	C02261	HMDB00650	4396916971251	Amino acid	Butanoate metabolism
2-arachidonoyl glycerol	19266	LC/MS Neg	5955	303.3	53847-30-6;	C13856	HMDB04666	5282280	Lipid	Monoacylglycerol
2-arachidonoylglycerophosphocholine*	33387	LC/MS Neg	5850	618					Lipid	Lysolipid
2-arachidonoylglycerophosphoethanolamine*	32815	LC/MS Neg	5674	500.3					Lipid	Lysolipid
2-docosahexaenoylglycerophosphoethanolamine*	34258	LC/MS Pos	5512	526.2					Lipid	Lysolipid
2-docosapentaenoylglycerophosphoethanolamine*	34875	LC/MS Pos	5548	528.2					Lipid	Lysolipid
2-eicosapentaenoylglycerophosphoethanolamine*	43254	LC/MS Pos	5448	500.1					Lipid	Lysolipid
2-eicosatrienoylglycerophosphocholine*	35884	LC/MS Pos	5565	546.3					Lipid	Lysolipid
2-hydroxyacetaminophen sulfate*	33173	LC/MS Neg	1703	246.1					Xenobiotics	Drug
2-hydroxybutyrate (AHB)	21044	GC/MS	1169.4	130.9	3347-90-8;	C05984	HMDB00008	440864	Amino acid	Cysteine, methionine, SAM, taurine metabolism
2-hydroxyglutarate	37253	GC/MS	1576	247	40951-21-1;	C02630	HMDB00606	43	Lipid	Fatty acid, dicarboxylate
2-hydroxypalmitate	35675	LC/MS Neg	5508	271.3	764-67-0;			92836	Lipid	Fatty acid, monohydroxy
2-hydroxystearate	17945	LC/MS Neg	5705	299.4	629-22-1;	C03045		69417	Lipid	Fatty acid, monohydroxy
2-linoleoylglycerol (2-monolinolein)	32506	LC/MS Neg	5988	279.3	3443-82-1;		HMDB11538	5365676	Lipid	Monoacylglycerol
2-linoleoylglycerophosphocholine*	38087	LC/MS Neg	5772	594					Lipid	Lysolipid
2-linoleoylglycerophosphoethanolamine*	36593	LC/MS Neg	5650	476.4					Lipid	Lysolipid
2-methoxyacetaminophen sulfate*	33178	LC/MS Neg	1977	260.1					Xenobiotics	Drug
2-methylbutyrylcarnitine (C5)	35431	LC/MS Pos	2439	246.1	31023-25-3;		HMDB00378	6426901	Amino acid	Valine, leucine and isoleucine metabolism
2-myristoylglycerophosphocholine*	35626	LC/MS Pos	5450	468.3					Lipid	Lysolipid
2-oleoylglycerol (2-monoolein)	35848	GC/MS	2170	410.1	3443-84-3;			5319879	Lipid	Monoacylglycerol
2-oleoylglycerophosphocholine*	35254	LC/MS Neg	6000	596					Lipid	Lysolipid
2-oleoylglycerophosphoethanolamine*	35687	LC/MS Neg	5848	478.3					Lipid	Lysolipid
2-oleoylglycerophosphoserine*	37948	LC/MS Neg	5577	522.3					Lipid	Lysolipid
2-palmitoleoylglycerophosphocholine*	35819	LC/MS Pos	5482	494.3					Lipid	Lysolipid
2-palmitoylglycerol (2-monopalmitin)	33419	LC/MS Neg	6112.6	255.4	23470-00-0;			123409	Lipid	Monoacylglycerol
2-palmitoylglycerophosphocholine*	35253	LC/MS Neg	5945	570.3					Lipid	Lysolipid
2-palmitoylglycerophosphoethanolamine*	35688	LC/MS Neg	5790	452.3					Lipid	Lysolipid
2-phosphoglycerate	35629	GC/MS	1734	459.1	70195-25-4;	C00631	HMDB03391		Carbohydrate	Glycolysis, gluconeogenesis, pyruvate metabolism
2-stearoylglycerophosphocholine*	35255	LC/MS Pos	5780	524.4				10208382	Lipid	Lysolipid
2-stearoylglycerophosphoethanolamine*	41220	LC/MS Pos	5779.6	482.2					Lipid	Lysolipid
3'-dephosphocoenzyme A	18289	LC/MS Neg	2010	686.2	3633-59-8;	C00882	HMDB01373	444485	Cofactors and vitamins	Pantothenate and CoA metabolism
3-(4-hydroxyphenyl)lactate	32197	LC/MS Neg	1395	181.1	6482-98-0;	C03672	HMDB00755	9378	Amino acid	Phenylalanine & tyrosine metabolism
3-(cystein-S-yl)acetaminophen*	34365	LC/MS Pos	1960	271.2				5233914	Xenobiotics	Drug
3-aminoisobutyrate	1566	GC/MS	1252.2	101.9	10569-72-9;214139-20-5;	C05145	HMDB03911	64956	Nucleotide	Pyrimidine metabolism, thymine containing; Valine, leucine and isoleucine metabolism/
3-carboxy-4-methyl-5-propyl-2-furanpropanoate (CMPF)	31787	LC/MS Neg	2815	239.1	86879-39-2;			123979	Lipid	Fatty acid, dicarboxylate
3-dehydrocarnitine*	32654	LC/MS Pos	1020	160.2	10457-99-5;	C02636	HMDB12154	6991982	Lipid	Carnitine metabolism
3-hydroxybutyrate (BHBA)	542	GC/MS	1203.5	116.9	625-72-9;	C01089	HMDB00357	441	Lipid	Ketone bodies
3-hydroxyhippurate	39600	LC/MS Neg	1670	194.1	1637-75-8;		HMDB06116	450268	Xenobiotics	Benzoate metabolism
3-indoxyl sulfate	27672	LC/MS Neg	2258	212	2642-37-7;		HMDB00682	10258	Amino acid	Tryptophan metabolism
3-methoxytyrosine	12017	LC/MS Pos	1765	212.1	300-48-1;		HMDB01434	9307	Amino acid	Phenylalanine & tyrosine metabolism
3-methyl-2-oxovalerate	15676	LC/MS Neg	2106	129.2	51829-07-3;	C00671	HMDB03736	47	Amino acid	Valine, leucine and isoleucine metabolism
3-methylglutarylcarnitine (C6)	37060	LC/MS Pos	1900	290.1	102673-95-0;		HMDB00552	128145	Amino acid	Valine, leucine and isoleucine metabolism
3-phosphoglycerate	40264	GC/MS	1754	357.1	80731-10-8;	C00597	HMDB00807		Carbohydrate	Glycolysis, gluconeogenesis, pyruvate metabolism
4-acetamidobutanoate	1558	LC/MS Pos	1724	146.1	3025-96-5;	C02946	HMDB03681	18189	Amino acid	Guanidino and acetamido metabolism
4-acetamidophenol	12032	LC/MS Pos	2238	152.1	103-90-2;	C06804	HMDB01859	1983	Xenobiotics	Drug
4-acetaminophen sulfate	37475	LC/MS Neg	1779	230.1	10066-90-7;32113-41-0;	C06804	HMDB01859	83939	Xenobiotics	Drug
4-androsten-3beta,17beta-diol disulfate 1*	37202	LC/MS Neg	3735	224.3			HMDB03818		Lipid	Sterol/Steroid
4-guanidinobutanoate	15681	LC/MS Pos	1085	146.1	463-003;463-00-3;	C01035	HMDB03464	500	Amino acid	Guanidino and acetamido metabolism
4-hydroxybutyrate (GHB)	34585	GC/MS	1277	233.1	502-85-2;	C00989	HMDB00710	10413	Lipid	Fatty acid, monohydroxy
4-hydroxyglutamate	40499	GC/MS	1644.2	244.1	2485-33-8;	C03079	HMDB01344	439902	Amino acid	Glutamate metabolism
4-hydroxyhippurate	35527	LC/MS Neg	1439	194	2482-25-9;			151012	Xenobiotics	Benzoate metabolism
4-hydroxyphenylacetate	541	GC/MS	1630.6	179	156-38-7;	C00642	HMDB00020	4693933	Amino acid	Phenylalanine & tyrosine metabolism
4-methyl-2-oxopentanoate	22116	LC/MS Neg	2200	129.2	816-66-0;	C00233	HMDB00695	70	Amino acid	Valine, leucine and isoleucine metabolism
4-methylcatechol sulfate	42493	LC/MS Neg	2666.4	203					Xenobiotics	Benzoate metabolism
5,6-dihydrouracil	1559	GC/MS	1505.2	243	504-07-4;	C00429	HMDB00076	649	Nucleotide	Pyrimidine metabolism, uracil containing
5-aminovalerate	18319	LC/MS Pos	860	118.1	660-88-8;	C00431	HMDB03355	6992101138	Amino acid	Urea cycle; arginine-, proline-, metabolism
5-methyltetrahydrofolate (5MeTHF)	18330	LC/MS Neg	1838	458.2	68703-91-3;68792-52-9;	C00440	HMDB01396	146	Cofactors and vitamins	Folate metabolism
5-methylthioadenosine (MTA)	1419	LC/MS Pos	2427	298.1	2457-80-9;	C00170	HMDB01173	439176	Amino acid	Polyamine metabolism
5-oxoproline	1494	LC/MS Neg	744	128.2	98-79-3;	C01879	HMDB00267	7405	Amino acid	Glutathione metabolism
6-keto prostaglandin F1alpha	20476	LC/MS Neg	4180	369.3	58961-34-8;58962-34-8;	C05961	HMDB02886	5280888	Lipid	Eicosanoid
6-phosphogluconate	15442	GC/MS	2060.4	387.2	921-62-0;53411-70-4;	C00345	HMDB01316	91493	Carbohydrate	Nucleotide sugars, pentose metabolism
7-alpha-hydroxy-3-oxo-4-cholestenoate (7-Hoca)	36776	LC/MS Neg	5268	429.4	115538-85-7;	C17337	HMDB12458	3081085	Lipid	Sterol/Steroid
7-alpha-hydroxycholesterol	35692	GC/MS	2300	456.2	566-27-8;	C03594	HMDB01496	107722	Lipid	Sterol/Steroid
7-beta-hydroxycholesterol	35092	GC/MS	2340	456.4	566-27-8;		HMDB06119	473141	Lipid	Sterol/Steroid
Ac-Ser-Asp-Lys-Pro-OH	40707	LC/MS Pos	1767	488.2	127103-11-1;			4409396	Peptide	Polypeptide
acetylcarnitine	32198	LC/MS Pos	1203	204.2	5080-50-2;	C02571	HMDB00201	7045767	Lipid	Carnitine metabolism
acetylcholine	18790	LC/MS Pos	866	146.1	60-32-1;	C01996	HMDB00895	187	Lipid	Neurotransmitter
acisoga	43258	LC/MS Pos	2317.9	185.3	106692-36-8;			129397	Amino acid	Polyamine metabolism
adenine	554	LC/MS Pos	1003	136.1	73-24-5;	C00147	HMDB00034	190	Nucleotide	Purine metabolism, adenine containing
adenosine	555	LC/MS Pos	1650	268.1	58-61-7;	C00212	HMDB00050	60961	Nucleotide	Purine metabolism, adenine containing
adenosine 2'-monophosphate (2'-AMP)	36815	LC/MS Pos	1625	348.1	130-49-4;	C00946	HMDB11617		Nucleotide	Purine metabolism, adenine containing
adenosine 3'-monophosphate (3'-AMP)	35142	LC/MS Pos	1451	348.1	84-21-9;	C01367	HMDB03540	15938966	Nucleotide	Purine metabolism, adenine containing
adenosine 5'-monophosphate (AMP)	32342	LC/MS Pos	1210	348.1	149022-20-8;	C00020	HMDB00045	15938965	Nucleotide	Purine metabolism, adenine containing
adenosine 5'-triphosphate (ATP)	33449	LC/MS Neg	700	506	51963-61-2;	C00002	HMDB00538	5957	Nucleotide	Purine metabolism, adenine containing
adenosine 5'diphosphoribose	558	LC/MS Pos	1040	560.1	68414-18-6;	C00301	HMDB01178	4475880	Cofactors and vitamins	Nicotinate and nicotinamide metabolism
adenylosuccinate	18360	LC/MS Neg	569	462.1	19046-78-7;	C03794	HMDB00536	195	Nucleotide	Purine metabolism, adenine containing
adipate	21134	GC/MS	1520	110.9	124-04-9;	C06104	HMDB00448	196	Lipid	Fatty acid, dicarboxylate
adrenate (22:4n6)	32980	LC/MS Neg	5684	331.3	2091-25-0;	C16527	HMDB02226	5282844	Lipid	Long chain fatty acid
alanine	1126	GC/MS	1147.6	115.9	56-41-7;	C00041	HMDB00161	59507311724	Amino acid	Alanine and aspartate metabolism
alanylglycine	37075	GC/MS	1412	272.1	687-69-4;		HMDB06899	524252679094	Peptide	Dipeptide
alanylisoleucine	37118	LC/MS Pos	2011	203.1				4173585246008	Peptide	Dipeptide
alanylleucine	37093	LC/MS Pos	2150	203	1638-60-4;			259583	Peptide	Dipeptide
alanylphenylalanine	38679	LC/MS Pos	2422	237.2	3061-90-3;			2080	Peptide	Dipeptide
alanylvaline	37084	LC/MS Pos	1513	189	3303-45-5;			137276	Peptide	Dipeptide
allantoin	1107	GC/MS	1809.8	518.3	97-59-6;	C02350	HMDB00462	204	Nucleotide	Purine metabolism, urate metabolism
alpha-hydroxyisovalerate	33937	LC/MS Neg	1142	117.1	600-37-3;		HMDB00407	99823	Amino acid	Valine, leucine and isoleucine metabolism
alpha-tocopherol	1561	GC/MS	2305.4	502.5	59-02-9;10191-41-0;	C02477	HMDB01893	14985	Cofactors and vitamins	Tocopherol metabolism
androsterone sulfate	31591	LC/MS Neg	5011	369.2	2479-86-9 ;	C00523	HMDB02759		Lipid	Sterol/Steroid
anserine	15747	LC/MS Neg	1126	239.2	10030-52-1;	C01262	HMDB00194	6992114112072	Peptide	Dipeptide derivative
arabitol	38075	GC/MS	1687.5	307.1	7643-75-6;	C00474	HMDB01851	94154	Carbohydrate	Nucleotide sugars, pentose metabolism
arabonate	37516	GC/MS	1736	292.1	7643-75-7;		HMDB00539	122045	Cofactors and vitamins	Ascorbate and aldarate metabolism
arachidate (20:0)	44679	LC/MS Neg	6282	311.3	506-30-9;	C06425	HMDB02212	10467	Lipid	Long chain fatty acid
arachidonate (20:4n6)	1110	LC/MS Neg	5525	303.4	506-32-1;	C00219	HMDB01043	444899	Lipid	Long chain fatty acid
arginine	1638	LC/MS Pos	650	175.2	1119-34-2;	C00062	HMDB00517	5246487232	Amino acid	Urea cycle; arginine-, proline-, metabolism
arginylisoleucine	40070	LC/MS Pos	1554	288.3	62632-70-6;			433625	Peptide	Dipeptide
arginylleucine	39995	LC/MS Pos	1620	288.3	1188-24-5;			333445	Peptide	Dipeptide
arginylphenylalanine	41485	LC/MS Pos	1795	322.2	2047-13-4;			4441256	Peptide	Dipeptide
ascorbate (Vitamin C)	1640	GC/MS	1850.1	332.1	134-03-2;	C00072	HMDB00044		Cofactors and vitamins	Ascorbate and aldarate metabolism
asparagine	11398	GC/MS	1651.2	231	70-47-3;	C00152	HMDB00168	62676992089	Amino acid	Alanine and aspartate metabolism
asparagylisoleucine	42976	LC/MS Pos	2070	246.2					Peptide	Dipeptide
asparagylleucine	42980	LC/MS Pos	2170	246.2					Peptide	Dipeptide
aspartate	15996	GC/MS	1529.7	232	56-84-8;	C00049	HMDB00191	5960	Amino acid	Alanine and aspartate metabolism
aspartate-glutamate	37461	LC/MS Pos	819	263.2	6157-06-8;			4130574	Peptide	Dipeptide
aspartylleucine	40068	LC/MS Pos	2310	247.2	3062-14-4;			332962	Peptide	Dipeptide
aspartylphenylalanine	22175	LC/MS Pos	2538	281.1	13433-09-5;		HMDB00706	93078	Peptide	Dipeptide
aspartyltryptophan	41481	LC/MS Pos	2717	320.2	71835-79-5;			9948926	Peptide	Dipeptide
aspartylvaline	41373	LC/MS Pos	1601.9	233.1	13433-04-0;			4991131	Peptide	Dipeptide
atenolol	38658	LC/MS Pos	1988	267.2	29122-68-7;	D00235	HMDB01924	2249	Xenobiotics	Drug
azelate (nonanedioate)	18362	LC/MS Neg	1322	187.2	123-99-9;	C08261	HMDB00784	2266	Lipid	Fatty acid, dicarboxylate
beta-alanine	55	GC/MS	1451.8	174	56-41-7;107-95-9;	C00099	HMDB00056	2394755801	Amino acid	Alanine and aspartate metabolism
beta-tocopherol	35702	GC/MS	2260	488.3	148-03-8;	C14152	HMDB06335	6857447	Cofactors and vitamins	Tocopherol metabolism
betaine	3141	LC/MS Pos	721	118.2	107-43-7;	C00719	HMDB00043	247	Amino acid	Glycine, serine and threonine metabolism
bilirubin (Z,Z)	27716	LC/MS Neg	4812	583.2	635-65-4;	C00486	HMDB00054	5280352	Cofactors and vitamins	Hemoglobin and porphyrin metabolism
butyrylcarnitine	32412	LC/MS Pos	2007	232.2	25576-40-3;	C02862	HDMB02013	213144	Lipid	Fatty acid metabolism (also BCAA metabolism)
C-glycosyltryptophan*	32675	LC/MS Pos	1912	367.1					Amino acid	Tryptophan metabolism
caffeine	569	LC/MS Pos	2820	195.1	58-08-2;	C07481	HMDB01847	2519	Xenobiotics	Xanthine metabolism
caprate (10:0)	1642	LC/MS Neg	5092	171.2	112-37-8;	C01571	HMDB00511	2969	Lipid	Medium chain fatty acid
caproate (6:0)	32489	LC/MS Neg	2766	115.2	142-62-1;	C01585	HMDB00535	8892	Lipid	Medium chain fatty acid
caprylate (8:0)	32492	LC/MS Neg	4367	143.2	124-07-2;	C06423	HMDB00482	379	Lipid	Medium chain fatty acid
carboxyibuprofen	43333	LC/MS Neg	1934	235	15935-54-3;			10444113	Xenobiotics	Drug
carnitine	15500	LC/MS Pos	702	162.2	461-05-2;	C00318		10917	Lipid	Carnitine metabolism
catechol sulfate	35320	LC/MS Neg	1928	188.9	120-80-9;	C00090		3083879	Xenobiotics	Benzoate metabolism
celecoxib	38599	LC/MS Neg	5257.9	380.2	169590-42-5;	C07589	HMDB05014	2662	Xenobiotics	Drug
cholate	22842	LC/MS Neg	5148	407.4	81-25-4;	C00695	HMDB00619		Lipid	Bile acid metabolism
cholesterol	63	GC/MS	2316.9	329.3	57-88-5;	C00187	HMDB00067	6432564	Lipid	Sterol/Steroid
choline phosphate	34396	LC/MS Pos	695	184.1	72556-74-2;	C00588		135437	Lipid	Glycerolipid metabolism
cis-aconitate	12025	LC/MS Neg	603	173.1	585-84-2;	C00417	HMDB00072	643757	Energy	Krebs cycle
cis-vaccenate (18:1n7)	33970	GC/MS	1987	339.3	506-17-2;	C08367		5282761	Lipid	Long chain fatty acid
citrate	1564	GC/MS	1763.4	273.1	77-92-9;	C00158	HMDB00094	311	Energy	Krebs cycle
citrulline	2132	LC/MS Pos	715	176.1	372-75-8;	C00327	HMDB00904	833	Amino acid	Urea cycle; arginine-, proline-, metabolism
creatine	27718	LC/MS Pos	758	132.1	57-00-1;	C00300	HMDB00064	586	Amino acid	Creatine metabolism
creatinine	513	LC/MS Pos	730	114.1	60-27-5;	C00791	HMDB00562	588	Amino acid	Creatine metabolism
cysteine	31453	GC/MS	1560.1	218	52-90-4;56-89-3;	C00097	HMDB00574	58626419722	Amino acid	Cysteine, methionine, SAM, taurine metabolism
cysteine-glutathione disulfide	35159	LC/MS Pos	821	427.1	13081-14-6;		HMDB00656	4247235	Amino acid	Glutathione metabolism
cysteinylglycine	35637	LC/MS Pos	801	179	19246-18-5;	C01419	HMDB00078	65270	Peptide	Dipeptide
cystine	39512	GC/MS	2015.3	145.9	56-89-3;	C00491	HMDB00192	595	Amino acid	Cysteine, methionine, SAM, taurine metabolism
cytidine	514	LC/MS Pos	1065	244	65-46-3;	C00475	HMDB00089	6175	Nucleotide	Pyrimidine metabolism, cytidine containing
cytidine 5'-diphosphocholine	34418	LC/MS Pos	777	489.1	33818-15-4;	C00307			Lipid	Glycerolipid metabolism
cytidine 5'-monophosphate (5'-CMP)	2372	LC/MS Pos	887	324	63-37-6;	C00055	HMDB00095	7058165	Nucleotide	Pyrimidine metabolism, cytidine containing
cytidine 5'-monophospho-N-acetylneuraminic acid	36831	LC/MS Pos	895	614.8	3063-71-6;	C00128	HMDB01176		Carbohydrate	Aminosugars metabolism
cytidine-3'-monophosphate (3'-CMP)	2959	LC/MS Pos	1181	323.9	84-52-6;	C05822		256622	Nucleotide	Pyrimidine metabolism, cytidine containing
decanoylcarnitine	33941	LC/MS Pos	4700	316.3	1492-27-9 ;		HMDB00651	10245190	Lipid	Carnitine metabolism
dehydroascorbate	1659	GC/MS	1800	245.1	490-83-5;	C05422	HMDB01264	835	Cofactors and vitamins	Ascorbate and aldarate metabolism
dehydroisoandrosterone sulfate (DHEA-S)	32425	LC/MS Neg	4771	367.2	651-48-9;	C04555	HMDB01032	12594	Lipid	Sterol/Steroid
deoxycarnitine	36747	LC/MS Pos	759	146.1	6249-56-5;	C01181	HMDB01161	725	Lipid	Carnitine metabolism
dihomo-linoleate (20:2n6)	17805	LC/MS Neg	5722	307.3	2091-39-6;	C16525		6439848	Lipid	Long chain fatty acid
dihomo-linolenate (20:3n3 or n6)	35718	LC/MS Neg	5600	305.4	17046-59-2 ;	C03242	HMDB02925	5312529	Lipid	Essential fatty acid
dimethylarginine (SDMA + ADMA)	36808	LC/MS Pos	812	203.2	102783-24-4;	C03626	HMDB01539	123831	Amino acid	Urea cycle; arginine-, proline-, metabolism
dimethylglycine	5086	GC/MS	1030	57.9	1118-68-9;	C01026	HMDB00092	6971056673	Amino acid	Glycine, serine and threonine metabolism
docosadienoate (22:2n6)	32415	LC/MS Neg	6017	335.4	7370-49-2 ;	C16533		5282807	Lipid	Long chain fatty acid
docosahexaenoate (DHA; 22:6n3)	19323	LC/MS Neg	5518	327.3	6217-54-5;	C06429	HMDB02183	445580	Lipid	Essential fatty acid
docosapentaenoate (n3 DPA; 22:5n3)	32504	LC/MS Neg	5574	329.4	2234-74-4 ;	C16513	HMDB01976		Lipid	Essential fatty acid
docosapentaenoate (n6 DPA; 22:5n6)	37478	LC/MS Neg	5625	329.4	25182-74-5;	C16513	HMDB13123	6441454	Lipid	Essential fatty acid
docosatrienoate (22:3n3)	32417	LC/MS Neg	5825	333.4	59708-86-0 ;	C16534	HMDB02823	5312556	Lipid	Long chain fatty acid
DSGEGDFXAEGGGVR*	31548	LC/MS Pos	3379	733.5					Peptide	Fibrinogen cleavage peptide
eicosapentaenoate (EPA; 20:5n3)	18467	LC/MS Neg	5442	301.3	10-2005-9;10417-94-4;	C06428	HMDB01999	446284	Lipid	Essential fatty acid
eicosenoate (20:1n9 or 11)	33587	LC/MS Neg	5955	309.4			HMDB02231		Lipid	Long chain fatty acid
ergothioneine	37459	LC/MS Pos	847	230.2	58511-63-0;	C05570	HMDB03045	3032311	Xenobiotics	Food component/Plant
erucate (22:1n9)	1552	LC/MS Neg	6273.3	337.4	112-86-7;	C08316	HMDB02068	8216	Lipid	Long chain fatty acid
erythritol	20699	GC/MS	1517.5	217	149-32-6;	C00503	HMDB02994		Xenobiotics	Sugar, sugar substitute, starch
erythronate*	33477	GC/MS	1546.9	292.1	88759-55-1;		HMDB00613	2781043	Carbohydrate	Aminosugars metabolism
erythrose-4-phosphate	15830	LC/MS Neg	619	199.1	103302-15-4;	C00279	HMDB01321	697	Carbohydrate	Nucleotide sugars, pentose metabolism
erythrulose	37427	GC/MS	1496	205.1	533-50-6;	C02045	HMDB06293	5460032	Secondary Metabolism	Advanced glycation end-product
ethanolamine	1497	GC/MS	1304	174.1	141-43-5;	C00189	HMDB00149		Lipid	Glycerolipid metabolism
flavin adenine dinucleotide (FAD)	2134	LC/MS Neg	2413	784.1	146-14-5;84366-81-4;	C00016	HMDB01248	643975	Cofactors and vitamins	Riboflavin metabolism
fructose	577	GC/MS	1758	217	57-48-7;	C00095	HMDB00660	5984	Carbohydrate	Fructose, mannose, galactose, starch, and sucrose metabolism
fructose 1-phosphate	15909	GC/MS	1983.1	445.2	53823-70-4;	C01094	HMDB01076	65246	Carbohydrate	Glycolysis, gluconeogenesis, pyruvate metabolism
fructose-6-phosphate	12021	GC/MS	1994.9	315.1	103213-47-4;	C05345	HMDB00124		Carbohydrate	Glycolysis, gluconeogenesis, pyruvate metabolism
fucose	15821	GC/MS	1682.2	204	2438-80-4;	C02095	HMDB00174	3034656	Carbohydrate	Aminosugars metabolism
fumarate	1643	GC/MS	1382.1	245	100-17-8;	C00122	HMDB00134		Energy	Krebs cycle
galactose	12055	GC/MS	1793.8	203.9	59-23-4;	C01582	HMDB00143	3037556	Carbohydrate	Fructose, mannose, galactose, starch, and sucrose metabolism
gamma-aminobutyrate (GABA)	1416	GC/MS	1539.7	304.1	56-12-2;	C00334	HMDB00112	6992099119	Amino acid	Glutamate metabolism
gamma-glutamylglutamate	36738	LC/MS Pos	1036	277.1	1116-22-9;			92865	Peptide	gamma-glutamyl
gamma-glutamylglutamine	2730	LC/MS Pos	806	276.1	10148-81-9;		HMDB11738	150914	Peptide	gamma-glutamyl
gamma-glutamylisoleucine*	34456	LC/MS Pos	2644	261.2			HMDB11170		Peptide	gamma-glutamyl
gamma-glutamylleucine	18369	LC/MS Pos	2744	261.2	2566-39-4;		HMDB11171	151023	Peptide	gamma-glutamyl
gamma-glutamylmethionine	37539	LC/MS Pos	1993	279.2	17663-87-5;			7009567	Peptide	gamma-glutamyl
gamma-glutamylphenylalanine	33422	LC/MS Pos	2846	295.1	7432-24-8;		HMDB00594	111299	Peptide	gamma-glutamyl
gamma-glutamylvaline	32393	LC/MS Pos	2040	247.2	2746-34-1;		HMDB11172		Peptide	gamma-glutamyl
gamma-tocopherol	33420	GC/MS	2264	488.4	54-28-4;	C02483	HMDB01492	14986	Cofactors and vitamins	Tocopherol metabolism
glucarate (saccharate)	1476	GC/MS	1885.8	333.1	5793-88-4;	C00818	HMDB00663	33037	Cofactors and vitamins	Ascorbate and aldarate metabolism
gluconate	587	GC/MS	1879.4	333	527-07-1;	C00257	HMDB00625	10690	Carbohydrate	Nucleotide sugars, pentose metabolism
glucose	20488	GC/MS	1866.8	217.1	50-99-7;	C00031	HMDB00122	79025	Carbohydrate	Glycolysis, gluconeogenesis, pyruvate metabolism
glucose 1-phosphate	15561	GC/MS	2017	299.1	56401-20-8;	C00103	HMDB01586	65533	Carbohydrate	Glycolysis, gluconeogenesis, pyruvate metabolism
glucose-6-phosphate (G6P)	31260	GC/MS	2042.7	387.2	103192-55-8;	C00668	HMDB01401		Carbohydrate	Glycolysis, gluconeogenesis, pyruvate metabolism
glucuronate	15443	GC/MS	1888	217	207300-70-7;	C00191	HMDB00127	65041	Carbohydrate	Aminosugars metabolism
glutamate	57	LC/MS Pos	700	148.1	56-86-0;	C00025	HMDB03339	611	Amino acid	Glutamate metabolism
glutamate, gamma-methyl ester	33487	LC/MS Pos	1062	162.1	1499-55-4 ;			73913	Amino acid	Glutamate metabolism
glutamine	53	LC/MS Pos	684	147.2	56-85-9;	C00064	HMDB00641	5961	Amino acid	Glutamate metabolism
glutamine-leucine	42994	LC/MS Pos	2180	260.2					Peptide	Dipeptide
glutarylcarnitine (C5)	35439	LC/MS Pos	1565	276.1	102636-82-8;		HMDB13130		Amino acid	Lysine metabolism
glutathione, oxidized (GSSG)	27727	LC/MS Pos	1535	613.1	103239-24-3;	C00127	HMDB03337	6535911215652	Amino acid	Glutathione metabolism
glutathione, reduced (GSH)	2127	LC/MS Pos	1274	308.1	70-18-8;	C00051	HMDB00125	124886	Amino acid	Glutathione metabolism
glycerate	1572	GC/MS	1360.7	189	600-19-1;	C00258	HMDB00139	752	Carbohydrate	Glycolysis, gluconeogenesis, pyruvate metabolism
glycerol	15122	GC/MS	1311	205	56-81-5;	C00116	HMDB00131	753	Lipid	Glycerolipid metabolism
glycerol 2-phosphate	27728	GC/MS	1691.8	243	819-83-0;	C02979	HMDB02520	2526	Xenobiotics	Chemical
glycerol 3-phosphate (G3P)	15365	GC/MS	1719.7	357.1	29849-82-9;	C00093	HMDB00126	754	Lipid	Glycerolipid metabolism
glycerophosphoethanolamine	37455	GC/MS	1906	357.1	33049-08-0;	C01233	HMDB00114	123874	Lipid	Glycerolipid metabolism
glycerophosphorylcholine (GPC)	15990	LC/MS Pos	694	258.1	28319-77-9;	C00670	HMDB00086	657272	Lipid	Glycerolipid metabolism
glycine	11777	GC/MS	1166	101.9	56-40-6;	C00037	HMDB00123	5257127750	Amino acid	Glycine, serine and threonine metabolism
glycolithocholate sulfate*	32620	LC/MS Neg	5015	512.3	15324-64-8;	C11301	HMDB02639	72222	Lipid	Bile acid metabolism
glycylisoleucine	36659	LC/MS Pos	2080	189.1	19461-38-2;				Peptide	Dipeptide
glycylleucine	34398	LC/MS Pos	2236	189.1	869-19-2;	C02155	HMDB00759	928431548899	Peptide	Dipeptide
glycylphenylalanine	33954	LC/MS Neg	2193	221.2	3321-03-7;			154934492953	Peptide	Dipeptide
glycylproline	22171	LC/MS Pos	1115	173.1	704-15-4;		HMDB00721	30136256993386	Peptide	Dipeptide
glycylthreonine	42050	GC/MS	1911.1	174.1	7093-70-1;			351980	Peptide	Dipeptide
glycylvaline	18357	LC/MS Pos	1572	175.1	1963-21-9;			27248076994979	Peptide	Dipeptide
guanidinoacetate	12359	GC/MS	1696.6	172	352-97-6;	C00581	HMDB00128	7.63395e+16	Amino acid	Guanidino and acetamido metabolism
guanine	32352	LC/MS Pos	1022	152.1	73-40-5;	C00242	HMDB00132	764	Nucleotide	Purine metabolism, guanine containing
guanosine	1573	LC/MS Neg	1675	282.1	118-00-3;	C00387	HMDB00133	6802	Nucleotide	Purine metabolism, guanine containing
guanosine 3'-monophosphate (3'-GMP)	39786	LC/MS Neg	792.2	362.1	117-68-0;			3522	Nucleotide	Purine metabolism, guanine containing
guanosine 5'- monophosphate (5'-GMP)	2849	LC/MS Pos	1300	364	5550-12-9;	C00144	HMDB01397	761	Nucleotide	Purine metabolism, guanine containing
guanosine 5'-diphospho-fucose	15903	LC/MS Neg	797	588.1	15839-70-0;				Nucleotide	Purine metabolism, guanine containing
gulono-1,4-lactone	33454	GC/MS	1862	333.1	1128-23-0;	C01040	HMDB03466	608	Cofactors and vitamins	Ascorbate and aldarate metabolism
heme	41754	LC/MS Pos	5057	616.2	14875-96-8;	C00032	HMDB03178		Cofactors and vitamins	Hemoglobin and porphyrin metabolism
heptaethylene glycol	38154	LC/MS Pos	2836	327.2	5617-32-3;			79718	Xenobiotics	Chemical
hexaethylene glycol	38133	LC/MS Pos	2651	283.2	2615-15-8;			17472	Xenobiotics	Chemical
hexanoylcarnitine	32328	LC/MS Pos	3174	260.2	6920-35-0;		HMDB00705	6426853	Lipid	Carnitine metabolism
hippurate	15753	LC/MS Neg	2136	178.1	495-69-2;	C01586	HMDB00714	464	Xenobiotics	Benzoate metabolism
histamine	1574	LC/MS Pos	570	112.2	51-45-6;	C00388	HMDB00870	774	Amino acid	Histidine metabolism
histidine	59	LC/MS Neg	757	154.1	5934-29-2;	C00135	HMDB00177	7733651426	Amino acid	Histidine metabolism
histidylleucine	40061	LC/MS Pos	1482	269.2	7763-65-7;			1890086992010	Peptide	Dipeptide
hydrochlorothiazide	39625	LC/MS Neg	2041.6	296.1	58-93-5;	C07041	HMDB01928	3639	Xenobiotics	Drug
hydroxybutyrylcarnitine*	43264	LC/MS Pos	1475	248.2			HMDB13127		Lipid	Fatty acid metabolism (also BCAA metabolism)
hydroxyisovaleroyl carnitine	35433	LC/MS Pos	1683	262.1	99159-87-2;				Amino acid	Valine, leucine and isoleucine metabolism
hydroxypioglitazone (M-IV)	43580	LC/MS Pos	3396	373.2	146062-44-4;				Xenobiotics	Drug
hypotaurine	590	GC/MS	1598.5	188	300-84-5;	C00519	HMDB00965	107812	Amino acid	Cysteine, methionine, SAM, taurine metabolism
hypoxanthine	3127	LC/MS Neg	1313	135.1	68-94-0;	C00262	HMDB00157	790	Nucleotide	Purine metabolism, (hypo)xanthine/inosine containing
indolelactate	18349	GC/MS	1964.9	202	832-97-3;	C02043	HMDB00671	92904	Amino acid	Tryptophan metabolism
inosine	1123	LC/MS Neg	1600	267.2	58-63-9;	C00294	HMDB00195		Nucleotide	Purine metabolism, (hypo)xanthine/inosine containing
inosine 5'-monophosphate (IMP)	2133	LC/MS Pos	1310	349	4691-65-0;	C00130	HMDB00175	7140378	Nucleotide	Purine metabolism, (hypo)xanthine/inosine containing
inositol 1-phosphate (I1P)	1481	GC/MS	2057.8	318.1	106032-59-1;	C04006	HMDB00213		Lipid	Inositol metabolism
Isobar: fructose 1,6-diphosphate, glucose 1,6-diphosphate, myo-inositol 1,4 or 1,3-diphosphate	36984	LC/MS Neg	572	339					Carbohydrate	Glycolysis, gluconeogenesis, pyruvate metabolism
Isobar: ribulose 5-phosphate, xylulose 5-phosphate	37288	GC/MS	1935	357.2					Carbohydrate	Nucleotide sugars, pentose metabolism
Isobar: UDP-acetylglucosamine, UDP-acetylgalactosamine	38673	LC/MS Pos	963	607.7					Carbohydrate	Aminosugars metabolism
isobutyrylcarnitine	33441	LC/MS Pos	1941	232.2	25518-49-4;		HMDB00736		Amino acid	Valine, leucine and isoleucine metabolism
isoleucine	1125	LC/MS Pos	1614	132.1	73-32-5;	C00407	HMDB00172	791	Amino acid	Valine, leucine and isoleucine metabolism
isoleucylalanine	40046	LC/MS Pos	1686	203.2	24787-73-3;			52460095246010	Peptide	Dipeptide
isoleucylarginine	40071	LC/MS Neg	2302	286.3	55715-01-0;			9900561	Peptide	Dipeptide
isoleucylglutamine	40019	LC/MS Pos	1530	260.2					Peptide	Dipeptide
isoleucylglycine	40008	LC/MS Pos	1732	189.2	868-28-0;			342532	Peptide	Dipeptide
isoleucylisoleucine	36761	LC/MS Pos	2678	245.1	42537-99-5;				Peptide	Dipeptide
isoleucylleucine	36760	LC/MS Pos	2856	245.1	26462-22-6;			11644431	Peptide	Dipeptide
isoleucylphenylalanine	40067	LC/MS Pos	3155	279.2	22951-98-0;			435728	Peptide	Dipeptide
isoleucylserine	40012	LC/MS Neg	1798	217.2	6403-14-1;				Peptide	Dipeptide
isoleucylthreonine	42968	LC/MS Pos	1555.1	233.2					Peptide	Dipeptide
isoleucyltyrosine	40073	LC/MS Pos	2300	295.2	38579-21-4;			342468	Peptide	Dipeptide
isoleucylvaline	40049	LC/MS Pos	2202	231.2	41017-96-3;			5246011435949	Peptide	Dipeptide
isovalerylcarnitine	34407	LC/MS Pos	2533	246.2	31023-24-2;		HMDB00688	6426851	Amino acid	Valine, leucine and isoleucine metabolism
kynurenate	1417	LC/MS Neg	2243	188.1	492-27-3;	C01717	HMDB00715	3845	Amino acid	Tryptophan metabolism
kynurenine	15140	LC/MS Pos	1902	209.1	2922-83-0;	C00328	HMDB00684	1611666971029	Amino acid	Tryptophan metabolism
L-methyldopa	1560	LC/MS Pos	1627	212.1	555-30-6;	C07194	HMDB11754	691917338853	Amino acid	Phenylalanine & tyrosine metabolism
lactate	33830	LC/MS Neg	670	89.1	79-33-4;	C00186	HMDB00190	612	Carbohydrate	Glycolysis, gluconeogenesis, pyruvate metabolism
laurate (12:0)	1645	LC/MS Neg	5288	199.3	143-07-7;	C02679	HMDB00638	3893	Lipid	Medium chain fatty acid
lauryl sulfate	43446	LC/MS Neg	5336	265.2	151-21-3;	D01045		8778	Xenobiotics	Chemical
laurylcarnitine	34534	LC/MS Pos	5066	344.3	25518-54-1;		HMDB02250	10427569	Lipid	Carnitine metabolism
leucine	60	LC/MS Pos	1674	132.2	61-90-5;	C00123	HMDB00687	70457986106	Amino acid	Valine, leucine and isoleucine metabolism
leucylalanine	40010	LC/MS Pos	1760	203.2	7298-84-2;			259321	Peptide	Dipeptide
leucylarginine	40028	LC/MS Neg	2351.3	286.3	26607-15-8;			3800205	Peptide	Dipeptide
leucylasparagine	40052	LC/MS Pos	1418	246.2	14608-81-2;			4128305	Peptide	Dipeptide
leucylglutamate	40021	LC/MS Pos	1716	261.2				52595895259590	Peptide	Dipeptide
leucylglycine	40045	LC/MS Pos	1800	189.2	686-50-0;			79070	Peptide	Dipeptide
leucylhistidine	40077	LC/MS Neg	2098	267.2	38062-72-5;			341684	Peptide	Dipeptide
leucylleucine	36756	LC/MS Pos	3012	245.1	3303-31-9;	C11332		768076992072	Peptide	Dipeptide
leucylserine	40048	LC/MS Neg	1837	217.2	6209-12-7;			3621685	Peptide	Dipeptide
leucylthreonine	42969	LC/MS Neg	2296	231.3					Peptide	Dipeptide
leucyltyrosine	40030	LC/MS Neg	2863	293.2	968-21-8;			273262	Peptide	Dipeptide
lidocaine	35661	LC/MS Pos	2761	235.2	137-58-6;	D00358		3676	Xenobiotics	Drug
linoleamide (18:2n6)	32455	LC/MS Pos	5639	280.2	3999-01-7;			6435901	Lipid	Fatty acid, amide
linoleate (18:2n6)	1105	LC/MS Neg	5533	279.3	60-33-3;	C01595	HMDB00673	5280450	Lipid	Essential fatty acid
linoleate, methyl ester	36801	GC/MS	1931	95.13	112-63-0;			5284421	Lipid	Fatty acid, methyl ester
linolenate [alpha or gamma; (18:3n3 or 6)]	34035	LC/MS Neg	5450	277.3		C06427	HMDB01388		Lipid	Essential fatty acid
lipitor	38619	LC/MS Neg	5091.5	557.3	134523-03-8;	D00887	HMDB05006	60823	Xenobiotics	Drug
lysine	1301	LC/MS Pos	603	147.2	56-87-1;	C00047	HMDB00182	5962	Amino acid	Lysine metabolism
lysylvaline	42099	LC/MS Pos	876.2	246.2	20556-11-0;			140709	Peptide	Dipeptide
malate	1303	GC/MS	1502	233	6915-15-7;	C00149	HMDB00156	525	Energy	Krebs cycle
malonylcarnitine	37059	LC/MS Pos	980	248.1	853728-01-5;		HMDB02095		Lipid	Fatty acid synthesis
maltohexaose	35170	LC/MS Neg	1224	989.1	34620-77-4;	C01936	HMDB12253	5288409	Carbohydrate	Fructose, mannose, galactose, starch, and sucrose metabolism
maltopentaose	35163	LC/MS Neg	1100	827.1	34620-76-3;	C06218	HMDB12254	3710145	Carbohydrate	Fructose, mannose, galactose, starch, and sucrose metabolism
maltose	15806	GC/MS	2142.1	204.1	6363-53-7;	C00208	HMDB00163	439341	Carbohydrate	Fructose, mannose, galactose, starch, and sucrose metabolism
maltotetraose	15910	LC/MS Neg	965	665.1	34612-38-9;	C02052	HMDB01296	446495	Carbohydrate	Fructose, mannose, galactose, starch, and sucrose metabolism
maltotriose	27723	GC/MS	2368.3	361.2	1109-28-0;	C01835	HMDB01262	439586	Carbohydrate	Fructose, mannose, galactose, starch, and sucrose metabolism
mannitol	15335	GC/MS	1839	319.1	69-65-8;	C00392	HMDB00765	6251	Carbohydrate	Fructose, mannose, galactose, starch, and sucrose metabolism
mannose	584	GC/MS	1753.5	203.9	3458-28-4;	C00159	HMDB00169	161658	Carbohydrate	Fructose, mannose, galactose, starch, and sucrose metabolism
mannose-6-phosphate	1470	GC/MS	2035.9	387.2	70442-25-0;104872-94-8;	C00275	HMDB01078		Carbohydrate	Fructose, mannose, galactose, starch, and sucrose metabolism
margarate (17:0)	1121	LC/MS Neg	5733	269.3	506-12-7;		HMDB02259	10465	Lipid	Long chain fatty acid
mead acid (20:3n9)	35174	LC/MS Neg	5642	305.4	20590-32-3;		HMDB10378	5312531	Lipid	Long chain fatty acid
metformin	39972	LC/MS Pos	762	130.2	1115-70-4;	C07151	HMDB01921	4091	Xenobiotics	Drug
methionine	1302	LC/MS Pos	1252	150.1	63-68-3;	C00073	HMDB00696	69920876137	Amino acid	Cysteine, methionine, SAM, taurine metabolism
methyl-alpha-glucopyranoside	20714	GC/MS	1809	204	97-30-3;	C02603		64947	Xenobiotics	Chemical
methyl-beta-glucopyranoside	40480	GC/MS	1821.6	204	709-50-2;			2108	Carbohydrate	Fructose, mannose, galactose, starch, and sucrose metabolism
methylphosphate	37070	GC/MS	1221	240.9	7023-27-0;			13130	Nucleotide	Purine and pyrimidine metabolism
metoprolol	18037	LC/MS Pos	3205	268.2	56392-17-7;	D02358	HMDB01932	4171	Xenobiotics	Drug
metoprolol acid metabolite*	34109	LC/MS Pos	2535	268.2	56392-14-4;			62936	Xenobiotics	Drug
myo-inositol	19934	GC/MS	1924.9	217	87-89-8;	C00137	HMDB00211		Lipid	Inositol metabolism
myristate (14:0)	1365	LC/MS Neg	5439	227.3	544-63-8;	C06424	HMDB00806	11005	Lipid	Long chain fatty acid
myristoleate (14:1n5)	32418	LC/MS Neg	5338	225.3	544-64-9 ;	C08322	HMDB02000	5281119	Lipid	Long chain fatty acid
N-acetyl-aspartyl-glutamate (NAAG)	35665	LC/MS Pos	1563	305	3106-85-2;	C12270	HMDB01067	5255	Amino acid	Glutamate metabolism
N-acetylalanine	1585	LC/MS Neg	882	130.1	97-69-8;	C02847	HMDB00766	88064	Amino acid	Alanine and aspartate metabolism
N-acetylarginine	33953	LC/MS Neg	1149	215.2	155-84-0;	C02562	HMDB04620	674271615663	Amino acid	Urea cycle; arginine-, proline-, metabolism
N-acetylasparagine	33942	LC/MS Pos	974	175.1	4033-40-3;		HMDB06028	99715	Amino acid	Alanine and aspartate metabolism
N-acetylaspartate (NAA)	22185	LC/MS Neg	620	174.1	997-55-7;997-55-7 ;	C01042	HMDB00812	65065	Amino acid	Alanine and aspartate metabolism
N-acetylcarnosine	43488	LC/MS Pos	1145	269.2	56353-15-2;			9903482	Peptide	Dipeptide derivative
N-acetylglutamine	33943	LC/MS Neg	783	187.1	2490-97-3;	C02716	HMDB06029	182230	Amino acid	Glutamate metabolism
N-acetylglycine	27710	GC/MS	1396.4	143.9	543-24-8;		HMDB00532	10972	Amino acid	Glycine, serine and threonine metabolism
N-acetylleucine	1587	LC/MS Pos	3444	174.1	1188-21-2;	C02710	HMDB11756	70912	Amino acid	Valine, leucine and isoleucine metabolism
N-acetylmethionine	1589	LC/MS Neg	1805	190.1	65-82-7;	C02712	HMDB11745	448580	Amino acid	Cysteine, methionine, SAM, taurine metabolism
N-acetylneuraminate	32377	LC/MS Pos	787	310	131-48-6;	C00270	HMDB00230		Carbohydrate	Aminosugars metabolism
N-acetylphenylalanine	33950	LC/MS Neg	2590	206.2	2018-61-3;	C03519	HMDB00512	74839	Amino acid	Phenylalanine & tyrosine metabolism
N-acetylthreonine	33939	LC/MS Neg	846	160.1	17093-74-2;	C01118		4651717	Amino acid	Glycine, serine and threonine metabolism
N-acetyltyrosine	32390	LC/MS Neg	1677	222.2	537-55-3 ;		HMDB00866	68310	Amino acid	Phenylalanine & tyrosine metabolism
N-acetylvaline	1591	LC/MS Neg	1697	158.2	96-81-1;		HMDB11757	66789	Amino acid	Valine, leucine and isoleucine metabolism
N-delta-acetylornithine*	43249	LC/MS Pos	836.2	175.1				9920500	Amino acid	Urea cycle; arginine-, proline-, metabolism
N-ethylglycinexylidide*	33080	LC/MS Pos	2584	207.2	7728-40-7;	C16561		24415	Xenobiotics	Drug
N1-methyladenosine	15650	LC/MS Pos	1356	282.1	15763-06-1;	C02494	HMDB03331	5460178	Nucleotide	Purine metabolism, adenine containing
N1-methylguanosine	31609	LC/MS Pos	1850	298.1	2140-65-0;		HMDB01563	96373	Nucleotide	Purine metabolism, guanine containing
N2,N2-dimethylguanosine	35137	LC/MS Pos	2157	312.1	2140-67-2;		HMDB04824	92919	Nucleotide	Purine metabolism, guanine containing
N2-(3-cyclopentylpropanoyl)glutamine	44583	LC/MS Neg	3600	269.2					Xenobiotics	Chemical
N2-acetyllysine	36751	LC/MS Pos	853	189.1	1946-82-3;	C12989	HMDB00446	699269792907	Amino acid	Lysine metabolism
N2-methylguanosine	35133	LC/MS Pos	1950	298.1	2140-77-4;		HMDB05862	3035422	Nucleotide	Purine metabolism, guanine containing
N6-acetyllysine	36752	LC/MS Neg	1056	187.1	692-04-6;	C02727	HMDB00206	699197892832	Amino acid	Lysine metabolism
N6-carbamoylthreonyladenosine	35157	LC/MS Pos	2656	413	24719-82-2;				Nucleotide	Purine metabolism, guanine containing
nicotinamide	594	LC/MS Pos	1267	123.1	98-92-0;	C00153	HMDB01406	936	Cofactors and vitamins	Nicotinate and nicotinamide metabolism
nicotinamide adenine dinucleotide (NAD+)	5278	LC/MS Neg	1411	661.8	53-84-9;	C00003	HMDB00902	1.08977e+18	Cofactors and vitamins	Nicotinate and nicotinamide metabolism
nicotinamide adenine dinucleotide reduced (NADH)	31475	LC/MS Neg	1554	664.1	58-68-4 ;606-68-8;	C00004	HMDB01487	439153	Cofactors and vitamins	Nicotinate and nicotinamide metabolism
nicotinamide ribonucleotide (NMN)	22152	LC/MS Pos	886	335.1	1094-61-7;	C00455	HMDB00229	14180	Cofactors and vitamins	Nicotinate and nicotinamide metabolism
nonadecanoate (19:0)	1356	LC/MS Neg	6073	297.3	646-30-0;	C16535	HMDB00772	12591	Lipid	Long chain fatty acid
octaethylene glycol	42361	LC/MS Pos	3054	388.2	5117-19-1;			78798	Xenobiotics	Chemical
octanoylcarnitine	33936	LC/MS Pos	4100	288.3	3671-77-0;	C02838	HMDB00791	123701	Lipid	Carnitine metabolism
olanzapine	35971	LC/MS Pos	2278	313.2	132539-06-1;	C07322	HMDB05012		Xenobiotics	Drug
oleate (18:1n9)	1359	GC/MS	1984.4	339.2	112-80-1;	C00712	HMDB00207	445639	Lipid	Long chain fatty acid
oleate, methyl ester	36796	GC/MS	1934	264.3	112-62-9;	C03425		5364509	Lipid	Fatty acid, methyl ester
oleic ethanolamide	38102	LC/MS Neg	6553	324.5	11-58-0;111-58-0;		HMDB02088	5283454	Lipid	Endocannabinoid
oleoylcarnitine	35160	LC/MS Pos	5202	426.4	38677-66-6;		HMDB05065		Lipid	Carnitine metabolism
ophthalmate	34592	LC/MS Pos	1457	290.1	495-27-2;		HMDB05765	9817431	Amino acid	Glutathione metabolism
ornithine	1493	GC/MS	1763.8	141.9	3184-13-2;	C00077	HMDB03374	6262	Amino acid	Urea cycle; arginine-, proline-, metabolism
oxalate (ethanedioate)	20694	LC/MS Neg	601.8	89.1	144-62-7;	C00209	HMDB02329	3819775971	Carbohydrate	Glyoxylate and dicarboxylate metabolism
oxypurinol	41725	GC/MS	1781.9	353.1	2465-59-0;	D02365	HMDB00786	4644	Xenobiotics	Drug
p-cresol sulfate	36103	LC/MS Neg	2896	187.1	3233-57-7;	C01468	HMDB11635	4615422	Amino acid	Phenylalanine & tyrosine metabolism
palatinitol	37469	GC/MS	2233	204	64519-82-0;			3034828	Carbohydrate	Fructose, mannose, galactose, starch, and sucrose metabolism
palmitate (16:0)	1336	LC/MS Neg	5619	255.3	57-10-3;	C00249	HMDB00220	985	Lipid	Long chain fatty acid
palmitate, methyl ester	12091	GC/MS	1843.8	86.9	112-39-0;	C16995		8181	Lipid	Fatty acid, methyl ester
palmitoleate (16:1n7)	33447	LC/MS Neg	5477	253.3	373-49-9;	C08362	HMDB03229	445638	Lipid	Long chain fatty acid
palmitoyl sphingomyelin	37506	GC/MS	2524	311.3	6254-89-3;			9939941	Lipid	Sphingolipid
palmitoylcarnitine	22189	LC/MS Pos	5179	400.4	6865-14-1;	C02990	HMDB00222	461	Lipid	Carnitine metabolism
pantothenate	1508	LC/MS Pos	2218	220.1	137-08-6;	C00864	HMDB00210	6613	Cofactors and vitamins	Pantothenate and CoA metabolism
paraxanthine	18254	LC/MS Pos	2444	181.2	611-59-6;	C13747	HMDB01860	4687	Xenobiotics	Xanthine metabolism
pelargonate (9:0)	12035	LC/MS Neg	4847	157.2	112-05-0;	C01601	HMDB00847	5461016	Lipid	Medium chain fatty acid
pentadecanoate (15:0)	1361	GC/MS	1853.5	299.2	1002-84-2;10002-84-2;	C16537	HMDB00826	13849	Lipid	Long chain fatty acid
pentaethylene glycol	38158	LC/MS Pos	2471	239.2	4792-15-8;			62551	Xenobiotics	Chemical
phenol sulfate	32553	LC/MS Neg	2150	173.1	937-34-8;	C02180		74426	Amino acid	Phenylalanine & tyrosine metabolism
phenylacetylglutamine	35126	LC/MS Neg	2314	263.2	28047-15-6;	C04148	HMDB06344	306137	Amino acid	Phenylalanine & tyrosine metabolism
phenylalanine	64	LC/MS Pos	2056	166.1	63-91-2;	C00079	HMDB00159	69256656140	Amino acid	Phenylalanine & tyrosine metabolism
phenylalanylalanine	41374	LC/MS Pos	2047.6	237.1	3918-87-4;			69931235488196	Peptide	Dipeptide
phenylalanylaspartate	41419	LC/MS Pos	1901	281.1	22828-05-3;			335051	Peptide	Dipeptide
phenylalanylglutamate	41432	LC/MS Pos	2005	295.2	3617-45-6;			4422358	Peptide	Dipeptide
phenylalanylglycine	41370	LC/MS Neg	2460.8	221.1	721-90-4;			98207	Peptide	Dipeptide
phenylalanylisoleucine	40069	LC/MS Pos	3050	279.2	22951-94-6;				Peptide	Dipeptide
phenylalanylleucine	40192	LC/MS Pos	3252	279.2	3303-55-7;			4078229	Peptide	Dipeptide
phenylalanylserine	40016	LC/MS Pos	1808	253.1	16053-39-7;			9859812	Peptide	Dipeptide
phenylalanyltyrosine	41527	LC/MS Pos	2630	329.2	17355-18-9;				Peptide	Dipeptide
phenylalanylvaline	41393	LC/MS Neg	3650	263.2	3918-90-9;			4096934	Peptide	Dipeptide
phenylcarnitine*	43265	LC/MS Pos	2595	266.2	105450-08-6;				Xenobiotics	Chemical
phosphate	11438	GC/MS	1307.7	298.9	7664-38-2 ;	C00009	HMDB01429	1061	Energy	Oxidative phosphorylation
phosphoenolpyruvate (PEP)	597	GC/MS	1595.4	369	10526-80-4;	C00074	HMDB00263	1005	Carbohydrate	Glycolysis, gluconeogenesis, pyruvate metabolism
phosphoethanolamine	1600	LC/MS Neg	644	140.1	1071-23-4;	C00346	HMDB00224	52323241015	Lipid	Glycerolipid metabolism
phytosphingosine	1510	LC/MS Pos	5189	318.4	554-62-1;	C12144	HMDB04610		Lipid	Sphingolipid
pipecolate	1444	LC/MS Pos	1120	130.1	4043-87-2;	C00408	HMDB00070	849	Amino acid	Lysine metabolism
piperine	33935	LC/MS Pos	5136	286.2	94-62-2;	C03882		638024	Xenobiotics	Food component/Plant
pivaloylcarnitine	35432	LC/MS Pos	2370	246.2			HDMB41993	126894	Xenobiotics	Drug
pro-hydroxy-pro	35127	LC/MS Pos	960	229.2	18684-24-7;		HMDB06695	11673055	Peptide	Dipeptide
proline	1898	LC/MS Pos	796	116.1	147-85-3;	C00148	HMDB00162	1457426971047	Amino acid	Urea cycle; arginine-, proline-, metabolism
prolylglycine	40703	LC/MS Pos	875	173.1	2578-57-6;			74080766426709	Peptide	Dipeptide
propionylcarnitine	32452	LC/MS Pos	1589	218.2	17298-37-2 ;	C03017	HMDB00824	107738	Lipid	Fatty acid metabolism (also BCAA metabolism)
prostaglandin A2	19761	LC/MS Neg	4875	333.3	13345-50-1;	C05953	HMDB02752	5280880	Lipid	Eicosanoid
prostaglandin B2	19499	LC/MS Neg	4943	333.4	13367-85-6;	C05954	HMDB04236	5280881	Lipid	Eicosanoid
prostaglandin E2	7746	LC/MS Neg	4562	351.3	363-24-6;	C00584	HMDB01220	5280360	Lipid	Eicosanoid
pseudoephedrine	39586	LC/MS Pos	2328.5	166.1	90-82-4;	C02765	HMDB01943	7028	Xenobiotics	Drug
pseudouridine	33442	LC/MS Neg	1104	243.1	1445-07-4;	C02067	HMDB00767		Nucleotide	Pyrimidine metabolism, uracil containing
putrescine	1408	GC/MS	1705.8	174	110-60-1;	C00134	HMDB01414		Amino acid	Polyamine metabolism
pyridoxate	31555	LC/MS Neg	2210	182.1	82-82-6 ;	C00847	HMDB00017	6723	Cofactors and vitamins	Pyridoxal metabolism
pyroglutamine*	32672	LC/MS Pos	764	129.2	2353-44-8;			134508	Amino acid	Glutamate metabolism
pyrophosphate (PPi)	2078	GC/MS	1642.3	451	1466-09-3;2466-09-3;	C00013	HMDB00250	644102	Energy	Oxidative phosphorylation
quinolinate	1899	GC/MS	1697.7	296.1	89-00-9;	C03722	HMDB00232	1066	Cofactors and vitamins	Nicotinate and nicotinamide metabolism
ribitol	15772	GC/MS	1692.4	217	488-81-3;	C00474	HMDB00508		Carbohydrate	Nucleotide sugars, pentose metabolism
riboflavin (Vitamin B2)	1827	LC/MS Pos	3111	377.2	83-88-5;	C00255	HMDB00244	493570	Cofactors and vitamins	Riboflavin metabolism
ribose	12080	GC/MS	1639.2	204	50-69-1;	C00121	HMDB00283	5311110	Carbohydrate	Nucleotide sugars, pentose metabolism
ribulose	35855	GC/MS	1662	306.1	488-84-6;	C00309	HMDB00621	79021	Carbohydrate	Nucleotide sugars, pentose metabolism
S-adenosylhomocysteine (SAH)	15948	LC/MS Neg	1821	383.1	979-92-0;	C00021	HMDB00939		Amino acid	Cysteine, methionine, SAM, taurine metabolism
S-methylcysteine	40262	GC/MS	1447.8	162.1	1187-84-4;		HMDB02108	705817424417	Amino acid	Cysteine, methionine, SAM, taurine metabolism
sarcosine (N-Methylglycine)	1516	GC/MS	1182.9	116	107-97-1;	C00213	HMDB00271	10887311726	Amino acid	Glycine, serine and threonine metabolism
scyllo-inositol	32379	GC/MS	1893.8	318.2	488-59-5;	C06153	HMDB06088		Lipid	Inositol metabolism
sedoheptulose-7-phosphate	35649	GC/MS	2070	691.35	2646-35-7;	C05382	HMDB01068	616	Carbohydrate	Nucleotide sugars, pentose metabolism
serine	1648	GC/MS	1389.1	204	56-45-1;	C00065	HMDB00187	59516857581	Amino acid	Glycine, serine and threonine metabolism
serylleucine	40066	LC/MS Pos	2106	219.2	6665-16-3;				Peptide	Dipeptide
serylmethionine	42043	LC/MS Pos	1545.9	237.1	3227-09-6;				Peptide	Dipeptide
serylphenyalanine	40054	LC/MS Pos	2348	253.2					Peptide	Dipeptide
seryltyrosine	42077	LC/MS Pos	1714	269.2	21435-27-8;			4575735	Peptide	Dipeptide
serylvaline	42058	LC/MS Pos	1501	205.1	51782-06-0;				Peptide	Dipeptide
sorbitol	15053	GC/MS	1843	319.1	6706-59-8;	C00794	HMDB00247	107428	Carbohydrate	Fructose, mannose, galactose, starch, and sucrose metabolism
sorbitol 6-phosphate	15699	LC/MS Neg	613	261.1	108392-12-7;				Carbohydrate	Fructose, mannose, galactose, starch, and sucrose metabolism
spermidine	485	LC/MS Pos	533	146.2	124-20-9;	C00315	HMDB01257	1102	Amino acid	Polyamine metabolism
spermine	603	LC/MS Pos	506	203.2	71-44-3;	C00750	HMDB01256	1103	Amino acid	Polyamine metabolism
sphingosine	17747	LC/MS Pos	5197	300.2	123-78-4;	C00319	HMDB00252	5353955	Lipid	Sphingolipid
squalene	1518	GC/MS	2205	69	111-02-4;	C00751	HMDB00256	638072	Lipid	Sterol/Steroid
stachydrine	34384	LC/MS Pos	860	144.1	4136-37-2;	C10172	HMDB04827	115244	Xenobiotics	Food component/Plant
stearate (18:0)	1358	LC/MS Neg	5886	283.4	57-11-4;	C01530	HMDB00827	5281	Lipid	Long chain fatty acid
stearate, methyl ester	6097	GC/MS	1946.4	73.9	112-61-8;			8201	Lipid	Fatty acid, methyl ester
stearidonate (18:4n3)	33969	LC/MS Neg	5381	275.3	111174-40-4 ;	C16300	HMDB06547	5312508	Lipid	Long chain fatty acid
stearoyl sphingomyelin	19503	GC/MS	2645	311.3	85187-10-6;85187-10-6 ;	C00550	HMDB01348	6453725	Lipid	Sphingolipid
stearoylcarnitine	34409	LC/MS Pos	5300	428.4	18822-91-8;		HMDB00848		Lipid	Carnitine metabolism
succinate	1437	GC/MS	1348	247	110-15-6;	C00042	HMDB00254	1110	Energy	Krebs cycle
succinylcarnitine	37058	LC/MS Pos	1401	262.1					Energy	Krebs cycle
taurine	2125	GC/MS	1616.4	254.1	107-35-7;	C00245	HMDB00251	11234068592	Amino acid	Cysteine, methionine, SAM, taurine metabolism
taurochenodeoxycholate	18494	LC/MS Neg	5218	498.3	6009-98-9;	C05465	HMDB00951	387316	Lipid	Bile acid metabolism
taurocholate	18497	LC/MS Neg	5122	514.3	145-42-6;	C05122	HMDB00036		Lipid	Bile acid metabolism
tetraethylene glycol	38101	LC/MS Pos	2192	195.1	112-60-7;			8200	Xenobiotics	Chemical
theobromine	18392	LC/MS Pos	2136	181.1	83-67-0;	C07480	HMDB02825	5429	Xenobiotics	Xanthine metabolism
threitol	35854	GC/MS	1513	217.1	2418-52-2;	C16884	HMDB04136	169019	Carbohydrate	Nucleotide sugars, pentose metabolism
threonate	27738	GC/MS	1560.7	292.1	70753-61-6;	C01620	HMDB00943	151152	Cofactors and vitamins	Ascorbate and aldarate metabolism
threonine	1284	GC/MS	1412.3	218.1	72-19-5;	C00188	HMDB00167	69710196288	Amino acid	Glycine, serine and threonine metabolism
threonylphenylalanine	31530	LC/MS Pos	2500	267.2	16875-27-7;			40997994099798	Peptide	Dipeptide
thymine	604	GC/MS	1429.1	255	65-71-4;	C00178	HMDB00262	1135	Nucleotide	Pyrimidine metabolism, thymine containing
trans-4-hydroxyproline	1366	GC/MS	1537	140	51-35-4;	C01157	HMDB00725	58106971053	Amino acid	Urea cycle; arginine-, proline-, metabolism
triethyleneglycol	27743	LC/MS Pos	1824	168.1	112-27-6;				Xenobiotics	Chemical
trigonelline (N'-methylnicotinate)	32401	LC/MS Pos	757	138.1	6138-41-6 ;	C01004	HMDB00875	5570	Cofactors and vitamins	Nicotinate and nicotinamide metabolism
tryptophan	54	LC/MS Pos	2445	205.1	73-22-3;	C00078	HMDB00929	69235166305	Amino acid	Tryptophan metabolism
tryptophan betaine	37097	LC/MS Pos	2464	247.1	20671-76-5;	C09213		442106	Amino acid	Tryptophan metabolism
tryptophylglycine	43028	LC/MS Pos	2351	262.2	7360-09-0;			263471	Peptide	Dipeptide
tyrosine	1299	LC/MS Pos	1516	182.1	60-18-4;	C00082	HMDB00158	60576942100	Amino acid	Phenylalanine & tyrosine metabolism
tyrosylarginine	42955	LC/MS Neg	1862	336.3				2932	Peptide	Dipeptide
tyrosylglutamate	42953	LC/MS Pos	1558	311.2					Peptide	Dipeptide
tyrosylglutamine	41459	LC/MS Pos	1437	310.2	28252-40-6;				Peptide	Dipeptide
tyrosylglycine	41375	LC/MS Pos	1596.8	239.1	673-05-5;			259323	Peptide	Dipeptide
tyrosylhistidine	41464	LC/MS Pos	903	319.2	3788-44-1;				Peptide	Dipeptide
tyrosylleucine	40031	LC/MS Pos	2656	295.2	17355-10-1;			870717009561	Peptide	Dipeptide
tyrosylvaline	41424	LC/MS Pos	2041	281.2	17355-09-8;			70095607009559	Peptide	Dipeptide
uracil	605	GC/MS	1370.4	241	66-22-8;	C00106	HMDB00300	1174	Nucleotide	Pyrimidine metabolism, uracil containing
urate	1604	LC/MS Neg	769	167.1	69-93-2;120K5305;	C00366	HMDB00289		Nucleotide	Purine metabolism, urate metabolism
urea	1670	GC/MS	1223.9	171	57-13-6;	C00086	HMDB00294	117616150869	Amino acid	Urea cycle; arginine-, proline-, metabolism
uridine	606	LC/MS Neg	1430	243.1	58-96-8;	C00299	HMDB00296	6029	Nucleotide	Pyrimidine metabolism, uracil containing
uridine monophosphate (5' or 3')	39879	LC/MS Pos	1079	325	58-97-9;		HMDB00288		Nucleotide	Pyrimidine metabolism, uracil containing
valerylcarnitine	34406	LC/MS Pos	2584	246.2			HMDB13128	6426903	Lipid	Fatty acid metabolism
valine	1649	LC/MS Pos	1040	118.1	72-18-4;	C00183	HMDB00883	69710186287	Amino acid	Valine, leucine and isoleucine metabolism
valylalanine	41518	LC/MS Pos	1278.6	189.1	27493-61-4;			334517	Peptide	Dipeptide
valylarginine	42072	LC/MS Neg	1805	272.2	37682-75-0;			4266827	Peptide	Dipeptide
valylasparagine	40727	LC/MS Neg	1334	230.2	66170-00-1;			70202007020201	Peptide	Dipeptide
valylaspartate	40650	LC/MS Pos	1073.3	233.1	20556-16-5;			9964657	Peptide	Dipeptide
valylglutamate	32454	LC/MS Pos	1346	247.1	3062-07-5;			7009623	Peptide	Dipeptide
valylglutamine	42079	LC/MS Pos	1102	246.2	42854-54-6;			5253209	Peptide	Dipeptide
valylglycine	40475	LC/MS Pos	1330	175.1	686-43-1;			136487	Peptide	Dipeptide
valylhistidine	40680	LC/MS Neg	1629.1	253.2	13589-07-6;				Peptide	Dipeptide
valylleucine	39994	LC/MS Pos	2503.3	231.2	22906-55-4;			352039	Peptide	Dipeptide
valyllysine	41384	LC/MS Neg	1601.8	244.2	22677-62-9;			5253210	Peptide	Dipeptide
valylmethionine	40674	LC/MS Pos	2000	249.1	14486-09-0;			292427	Peptide	Dipeptide
valylphenylalanine	40688	LC/MS Neg	3560	263.2	3918-92-1;			69931196993120	Peptide	Dipeptide
valylserine	40716	LC/MS Neg	1332	203.2	15388-94-8;			139506	Peptide	Dipeptide
valylthreonine	44543	LC/MS Pos	1094	219.1	72636-02-3 ;			4046492	Peptide	Dipeptide
valyltryptophan	40649	LC/MS Pos	2830	304.2	24587-37-9;			3360287	Peptide	Dipeptide
valyltyrosine	40697	LC/MS Pos	2000	281.2	3061-91-4;			4065033	Peptide	Dipeptide
valylvaline	40728	LC/MS Neg	2684	215.2	3918-94-3;			4096824280382	Peptide	Dipeptide
vecuronium	42591	LC/MS Pos	2963	279.4	50700-72-6;				Xenobiotics	Drug
VGAHAGEYGAEALER*	41219	LC/MS Neg	2687	763.8					Peptide	Polypeptide
warfarin	43335	LC/MS Neg	3779	307.2	5543-57-7;				Xenobiotics	Drug
xanthine	3147	LC/MS Pos	1430	153.1	69-89-6;	C00385	HMDB00292	1188	Nucleotide	Purine metabolism, (hypo)xanthine/inosine containing
xanthosine	15136	LC/MS Neg	1075	283.1	146-80-5;	C01762	HMDB00299	64959	Nucleotide	Purine metabolism, (hypo)xanthine/inosine containing
xylitol	41319	GC/MS	1677.6	217	87-99-0;	C00379	HMDB02917	6912	Carbohydrate	Nucleotide sugars, pentose metabolism
xylonate	35638	GC/MS	1722	292	73686-31-7;	C05411		6602431	Carbohydrate	Nucleotide sugars, pentose metabolism
xylulose	18344	GC/MS	1668	306.1	551-84-8;	C00310	HMDB00654	5289590	Carbohydrate	Nucleotide sugars, pentose metabolism
X - 02249	32587	LC/MS Neg	4025	267.2						.
X - 02269	32549	LC/MS Neg	1551	255.1						.
X - 10346	33782	LC/MS Neg	3989	259.1						.
X - 10445	32894	LC/MS Pos	1939	250.1						.
X - 11261	32578	LC/MS Pos	3600	286.2						.
X - 11315	32632	LC/MS Pos	1210	130.2						.
X - 11372	32689	LC/MS Neg	5303	467.4						.
X - 11381	32698	LC/MS Pos	1126	186.2						.
X - 11400	32717	LC/MS Pos	2855	828.2						.
X - 11429	32746	LC/MS Neg	1151	245.1						.
X - 11437	32754	LC/MS Neg	2888	231						.
X - 11444	32761	LC/MS Neg	3983	541.2						.
X - 11521	32838	LC/MS Pos	3650	286.2						.
X - 11537	32854	LC/MS Pos	5200	366.3						.
X - 11538	32855	LC/MS Neg	4920	311.3						.
X - 11570	32887	LC/MS Pos	1417	470.1						.
X - 11575	32892	LC/MS Pos	1799	264.1						.
X - 11578	32895	LC/MS Pos	2146	298.1						.
X - 11583	32900	LC/MS Pos	2793	457.1						.
X - 11585	32902	LC/MS Pos	2987	332						.
X - 11591	32908	LC/MS Neg	767	472.1						.
X - 11593	32910	LC/MS Neg	790	189.2						.
X - 11596	32913	LC/MS Neg	936	178.1						.
X - 11611	32928	LC/MS Neg	1632	429.1						.
X - 11612	32974	LC/MS Pos	1835	285						.
X - 11613	32930	LC/MS Neg	1658	369.1						.
X - 11615	32932	LC/MS Neg	1604	228.2						.
X - 11616	32933	LC/MS Neg	1738	309.1						.
X - 11621	32938	LC/MS Neg	2566	394.1						.
X - 11641	32958	LC/MS Neg	3950	325.3						.
X - 11662	32990	LC/MS Neg	2385	249.1						.
X - 11687	33031	LC/MS Pos	2182	384.1						.
X - 11715	33060	LC/MS Pos	1055	946						.
X - 11787	33132	LC/MS Pos	1126	148.1						.
X - 11827	33172	LC/MS Neg	1575	312.1						.
X - 11837	33248	LC/MS Neg	2484	283.1						.
X - 11851	33196	LC/MS Neg	3329	423						.
X - 11852	33197	LC/MS Neg	3324	233.1						.
X - 11880	33225	LC/MS Neg	5378	537.4						.
X - 12014	33360	LC/MS Neg	1998	249.1						.
X - 12092	33507	LC/MS Pos	1142	144.2						.
X - 12093	33508	LC/MS Pos	1063	203.2						.
X - 12100	33515	LC/MS Pos	1793	221.1						.
X - 12104	33519	LC/MS Pos	1755	271.1						.
X - 12216	33637	LC/MS Neg	1701	228.1						.
X - 12257	33679	LC/MS Neg	1791	269.1						.
X - 12423	33851	LC/MS Pos	6342	338.4						.
X - 12462	33907	LC/MS Pos	1269	148.2						.
X - 12524	34062	LC/MS Neg	5567	205.2						.
X - 12609	34203	LC/MS Neg	2218	485.3						.
X - 12627	34221	LC/MS Neg	5732	357.4						.
X - 12734	34344	LC/MS Neg	2214	219.1						.
X - 12739	34349	LC/MS Neg	2414	241.2						.
X - 12740	34350	LC/MS Neg	2499	287.1						.
X - 12741	34351	LC/MS Neg	2485	294.1						.
X - 12742	34352	LC/MS Neg	2534	241.2						.
X - 12748	37939	LC/MS Neg	558	320.1						.
X - 12760	34370	LC/MS Pos	2001	302.2						.
X - 12776	34453	LC/MS Neg	665	119.1						.
X - 12792	34475	LC/MS Pos	812	134						.
X - 12798	34481	LC/MS Pos	1860	240.1						.
X - 12799	34482	LC/MS Pos	2050	415.8						.
X - 12800	34483	LC/MS Pos	2263	417.3						.
X - 12802	34485	LC/MS Pos	2731	318.2						.
X - 12804	34487	LC/MS Pos	2858	300.2						.
X - 12805	34488	LC/MS Pos	3259	358.2						.
X - 12824	34507	LC/MS Neg	2803	243.2						.
X - 12844	34527	LC/MS Neg	4168	539.3						.
X - 12854	34538	LC/MS Pos	1380	405.2						.
X - 12855	34539	LC/MS Pos	1404	248.2						.
X - 12860	34544	LC/MS Pos	2264	276.2						.
X - 12866	34550	LC/MS Neg	1257	190.1						.
X - 12869	34553	LC/MS Neg	1385	192.1						.
X - 13002	34686	LC/MS Neg	1388	572.2						.
X - 13005	34690	LC/MS Neg	3519	197.1						.
X - 13006	34691	LC/MS Neg	3922	313.1						.
X - 13019	34704	LC/MS Pos	2782	184.4						.
X - 13093	34785	LC/MS Pos	5164	332.4						.
X - 13230	34927	LC/MS Neg	674	161						.
X - 13372	35072	LC/MS Neg	5030	277.1						.
X - 13391	35091	LC/MS Pos	3975	204.1						.
X - 13396	35099	LC/MS Pos	5153	246.2						.
X - 13409	35124	LC/MS Pos	2897	792.3						.
X - 13417	35146	LC/MS Pos	3140	617.4						.
X - 13418	35148	LC/MS Pos	3181	759.2						.
X - 13421	35154	LC/MS Pos	2381	597.4						.
X - 13422	35155	LC/MS Pos	2624	664.1						.
X - 13445	35208	LC/MS Pos	2088	729.6						.
X - 13446	35209	LC/MS Pos	2145	477.1						.
X - 13447	35210	LC/MS Pos	2381	179.2						.
X - 13458	35221	LC/MS Neg	4532	915.9						.
X - 13481	35245	LC/MS Pos	1469	200.2						.
X - 13483	35247	LC/MS Pos	1982	237.1						.
X - 13504	35278	LC/MS Pos	948	228.1						.
X - 13512	35286	LC/MS Pos	2176	247.1						.
X - 13528	35302	LC/MS Neg	875	217						.
X - 13529	35303	LC/MS Neg	2014	188.1						.
X - 13530	35304	LC/MS Neg	4920	524						.
X - 13543	35321	LC/MS Pos	1096	484.1						.
X - 13557	35335	LC/MS Neg	3611	252						.
X - 13647	35430	LC/MS Neg	2821	345.2						.
X - 13671	35464	LC/MS Neg	5226	315.3						.
X - 13698	35507	LC/MS Pos	1900	413						.
X - 13709	35518	LC/MS Pos	1938	302.1						.
X - 13722	35532	LC/MS Neg	893	160.1						.
X - 13726	35536	LC/MS Neg	1523	379						.
X - 13729	35539	LC/MS Neg	1754	242						.
X - 13737	35547	LC/MS Pos	923	129.1						.
X - 13859	35754	LC/MS Neg	721	286.1						.
X - 13891	35786	LC/MS Neg	2716	227.1						.
X - 14141	36067	LC/MS Neg	1337	259.1						.
X - 14192	36118	LC/MS Pos	1582	260.2						.
X - 14264	36190	LC/MS Neg	2086	258.2						.
X - 14272	36198	LC/MS Pos	2265	261.1						.
X - 14320	36246	LC/MS Pos	2501	295.1						.
X - 14331	36257	LC/MS Pos	2560	393.1						.
X - 14347	36273	LC/MS Neg	2509	292.2						.
X - 14384	36310	LC/MS Neg	2732	265.2						.
X - 14429	36355	LC/MS Pos	3089	407.2						.
X - 14590	36517	LC/MS Pos	1192	361.2						.
X - 14594	36521	LC/MS Pos	5267	260.2						.
X - 14596	36523	LC/MS Pos	2510	176.1						.
X - 14606	36533	LC/MS Pos	3091	637.7						.
X - 14634	36561	LC/MS Pos	652	222.1						.
X - 14837	36854	LC/MS Pos	1497	233.1						.
X - 14900	36927	LC/MS Neg	2117	258.2						.
X - 15150	37291	LC/MS Neg	1534	294.1						.
X - 15160	37301	LC/MS Pos	1468	283.1						.
X - 15161	37302	LC/MS Pos	1515	206						.
X - 15163	37304	LC/MS Pos	1533	502.8						.
X - 15168	37309	LC/MS Pos	1850	294.1						.
X - 15172	37313	LC/MS Pos	2255	494.3						.
X - 15174	37315	LC/MS Pos	2333	525.2						.
X - 15220	37362	LC/MS Neg	2632	274.1						.
X - 15303	37550	LC/MS Pos	1450	278.7						.
X - 15306	37553	LC/MS Pos	2994	275.2						.
X - 15312	37559	LC/MS Pos	3079	331.9						.
X - 15317	37564	LC/MS Pos	1595	314						.
X - 15324	37571	LC/MS Neg	1167	249						.
X - 15337	37584	LC/MS Pos	3702	272						.
X - 15363	37610	LC/MS Pos	3208	190.1						.
X - 15371	37618	LC/MS Neg	4060	557.2						.
X - 15375	37622	LC/MS Pos	2502	328						.
X - 15382	37629	LC/MS Pos	2540	271						.
X - 15386	37633	LC/MS Pos	2518	692.2						.
X - 15388	37635	LC/MS Neg	4225	711.3						.
X - 15408	37656	LC/MS Neg	2910	174.1						.
X - 15420	37668	LC/MS Neg	889	192						.
X - 15422	37670	LC/MS Neg	922	199						.
X - 15464	37712	LC/MS Pos	2999	489.9						.
X - 15472	37720	LC/MS Pos	3653	204.1						.
X - 15482	37730	LC/MS Pos	3635	272.1						.
X - 15484	37732	LC/MS Pos	2506	271						.
X - 15494	37742	LC/MS Neg	2038	572.2						.
X - 15503	37751	LC/MS Neg	1882	193.1						.
X - 15520	37881	LC/MS Neg	1372	476.1						.
X - 15528	37776	LC/MS Pos	2175	170.1						.
X - 15534	37782	LC/MS Pos	2372	551.6						.
X - 15543	37792	LC/MS Pos	1593	430.1						.
X - 15546	37795	LC/MS Pos	1861	271.1						.
X - 15564	37837	LC/MS Neg	1330	189.1						.
X - 15567	37816	LC/MS Pos	1922	397.2						.
X - 15569	37818	LC/MS Pos	2101	430.9						.
X - 15571	37820	LC/MS Pos	2175	589						.
X - 15572	37821	LC/MS Pos	2475	296.3						.
X - 15573	37822	LC/MS Pos	2476	437.4						.
X - 15576	37825	LC/MS Pos	3108	454.9						.
X - 15577	37826	LC/MS Pos	3298	416.2						.
X - 15578	37827	LC/MS Pos	3334	652.2						.
X - 15581	37830	LC/MS Pos	3527	446.2						.
X - 15591	37840	LC/MS Neg	1790	203.1						.
X - 15592	37841	LC/MS Neg	1819	360.1						.
X - 15595	37844	LC/MS Neg	2124	343						.
X - 15601	37850	LC/MS Neg	2711	320.9						.
X - 15602	37851	LC/MS Neg	2803	317.2						.
X - 15603	37852	LC/MS Neg	2879	458.3						.
X - 15605	37854	LC/MS Neg	3119	270						.
X - 15606	37855	LC/MS Neg	3196	247						.
X - 15608	37857	LC/MS Neg	3605	330.2						.
X - 15609	37858	LC/MS Neg	3664	273.1						.
X - 15612	37861	LC/MS Neg	3908	303.2						.
X - 15678	37927	LC/MS Pos	1742	249.1						.
X - 15680	37929	LC/MS Pos	1835	297.1						.
X - 15689	37938	LC/MS Pos	4467	523.6						.
X - 15694	37943	LC/MS Pos	1180	109						.
X - 15735	37984	LC/MS Pos	3092	314.2						.
X - 15798	38053	LC/MS Pos	1079	442						.
X - 15807	38062	LC/MS Neg	3366	337.2						.
X - 15808	38063	LC/MS Neg	3534	240.2						.
X - 15824	38081	LC/MS Pos	3114	254.1						.
X - 15842	38191	LC/MS Neg	1616	170.1						.
X - 15925	38355	LC/MS Neg	2215	227						.
X - 16060	38502	LC/MS Neg	3952	241						.
X - 16065	38508	LC/MS Neg	1364	442.2						.
X - 16094	38537	LC/MS Pos	3691	276.2						.
X - 16103	38546	LC/MS Neg	659.1	99.3						.
X - 16121	38568	LC/MS Neg	2152.3	807						.
X - 16186	38744	LC/MS Pos	2264.8	549.3						.
X - 16212	38778	LC/MS Neg	5329.8	385.2						.
X - 16252	38821	LC/MS Neg	1534.6	174.1						.
X - 16255	38824	LC/MS Pos	1717.9	328.9						.
X - 16343	38912	LC/MS Neg	2090.5	278.1						.
X - 16368	38937	LC/MS Neg	2790.8	331.2						.
X - 16369	38938	LC/MS Neg	2840	460.2						.
X - 16379	38948	LC/MS Neg	3159.6	231.1						.
X - 16380	38949	LC/MS Neg	3194	838.3						.
X - 16538	39111	LC/MS Pos	1244.9	515.6						.
X - 16614	39187	LC/MS Neg	1985.1	202.1						.
X - 16617	39190	LC/MS Neg	2805.1	218.1						.
X - 16626	39199	LC/MS Pos	4348.4	464.4						.
X - 16627	39200	LC/MS Pos	4594.7	655.2						.
X - 16693	39272	LC/MS Pos	1628.4	176						.
X - 16940	39523	LC/MS Neg	1694.1	204.9						.
X - 16958	39544	LC/MS Pos	1715	444						.
X - 16964	39550	LC/MS Neg	2988	174.2						.
X - 16965	39551	LC/MS Neg	1602	126.2						.
X - 17010	39641	LC/MS Neg	3169.5	189						.
X - 17011	39642	LC/MS Neg	1070.5	142						.
X - 17115	39752	LC/MS Neg	1308.7	316						.
X - 17246	39949	LC/MS Neg	1223.1	362.1						.
X - 17327	40188	LC/MS Neg	3037.5	255.3						.
X - 17347	40154	LC/MS Neg	1851.9	219.1						.
X - 17501	40331	LC/MS Neg	5051.6	287.3						.
X - 17852	40954	LC/MS Neg	1960.3	330.2						.
X - 18111	41213	LC/MS Pos	4250	577.4						.
X - 18113	41215	LC/MS Pos	4290.6	599.5						.
X - 18162	41265	LC/MS Neg	2250.1	278.2						.
X - 18254	41358	LC/MS Pos	2159.5	253.9						.
X - 18301	41462	LC/MS Pos	2489.2	708.4						.
X - 18307	41484	LC/MS Pos	3525.1	578.2						.
X - 18309	41491	LC/MS Pos	4323.5	621.4						.
X - 18341	41559	LC/MS Neg	1038.9	190.1						.
X - 18354	41572	LC/MS Neg	2791.5	275.1						.
X - 18472	41699	LC/MS Neg	1231.1	827.1						.
X - 18485	41712	LC/MS Pos	997.5	132.1						.
X - 18524	41753	LC/MS Neg	2051.4	295.1						.
X - 18557	41786	LC/MS Neg	1634.4	138						.
X - 18568	41797	LC/MS Neg	2940.3	599.3						.
X - 18739	42076	LC/MS Pos	5076.6	370.4						.
X - 18800	42175	LC/MS Pos	2163.5	332.1						.
X - 18808	42193	LC/MS Pos	2446.8	256.1						.
X - 18889	42274	LC/MS Neg	2662.5	202.1						.
X - 18935	42322	LC/MS Neg	1932.1	228.1						.
X - 19316	42792	LC/MS Pos	1206.5	186.1						.
X - 19325	42801	LC/MS Pos	1807	220.1						.
X - 19350	42826	LC/MS Neg	1149	394.3						.
X - 19364	42840	LC/MS Neg	1694	549.2						.
X - 19371	42847	LC/MS Neg	1874	572.3						.
X - 19373	42849	LC/MS Neg	1938	571.3						.
X - 19375	42851	LC/MS Neg	1983	414.3						.
X - 19378	42854	LC/MS Neg	2206	595.3						.
X - 19380	42856	LC/MS Neg	2287	412.4						.
X - 19437	42913	LC/MS Neg	1150.1	397.1						.
X - 19516	43069	LC/MS Pos	2735.1	227.2						.
X - 19550	43106	LC/MS Pos	2894	484.4						.
X - 19551	43107	LC/MS Pos	3019.7	815.2						.
X - 19552	43108	LC/MS Pos	3280.6	469.8						.
X - 19553	43109	LC/MS Pos	3501.2	459.7						.
X - 19554	43110	LC/MS Pos	3618.7	471						.
X - 19555	43111	LC/MS Pos	3781.7	357.3						.
X - 19557	43113	LC/MS Pos	1804.4	195.8						.
X - 19560	43116	LC/MS Neg	1682.2	459.4						.
X - 19561	43117	LC/MS Neg	1849.4	252.2						.
X - 19564	43120	LC/MS Neg	2845.3	530.4						.
X - 19568	43124	LC/MS Neg	3221.8	727.5						.
X - 19581	43137	LC/MS Neg	4949.6	938.5						.
X - 19703	43292	LC/MS Pos	3975.2	406.5						.
X - 19751	43352	LC/MS Neg	2346.3	363.3						.
X - 19778	43438	LC/MS Neg	2500	731.6						.
X - 19944	43718	LC/MS Pos	1963.9	288.3						.
X - 19959	43734	LC/MS Neg	1583	548.1						.
X - 19960	43735	LC/MS Neg	1644.3	548.1						.
X - 20061	44600	LC/MS Pos	2487.7	234.1						.
X - 20123	44702	LC/MS Pos	1639.2	536.9						.
X - 20163	44746	LC/MS Pos	2380.1	280.1						.
X - 20197	44780	LC/MS Neg	2695.6	286.3						.
X - 20712	45313	LC/MS Neg	2331.2	217.1						.
X - 20764	45365	LC/MS Neg	3644.2	302.2						.
