# Supplementary material for: Abnormal oxidative metabolism in a quiet genomic background underlies clear cell papillary renal cell carcinoma
Source: eLife. 2019 Apr 1;8:e38986. doi: 10.7554/eLife.38986 (PMC6459676; doi:10.7554/eLife.38986)
Supplement: Figure 3—source data 1. [file elife-38986-fig3-data1.xlsx]

## Sheet: RNA_CCPAPvsNormal
	logFC	AveExpr	t	P.Value	adj.P.Val	B
MYEOV	9.70648	-3.21357	35.1263	2.22007e-49	3.62115e-45	101.05
LECT1	11.7171	-4.51982	32.8913	2.64828e-47	2.1598e-43	96.1817
B4GALNT1	8.48864	-0.075608	31.9949	1.95214e-46	1.06138e-42	95.0781
CA9	10.3601	-1.91242	28.3948	9.95489e-43	4.05936e-39	86.5958
INHA	7.27543	-0.267297	27.3994	1.23693e-41	3.3626e-38	84.3625
KISS1R	8.51735	-4.40969	27.425	1.15836e-41	3.3626e-38	83.5609
SLC30A10	8.21533	-4.66417	27.3346	1.46134e-41	3.40514e-38	83.0374
NMB	4.31728	2.46909	26.5801	1.04147e-40	1.69874e-37	82.4119
SLC26A10	7.3402	-2.74887	26.7633	6.43768e-41	1.31256e-37	82.345
GABRD	7.65984	-2.18566	26.6188	9.40547e-41	1.69874e-37	82.1686
TMEM91	4.17308	2.29925	26.4028	1.66301e-40	2.26044e-37	81.9471
COX4I2	6.08971	0.800094	26.4269	1.5605e-40	2.26044e-37	81.9457
NXPH4	6.37142	0.234773	26.1968	2.87384e-40	3.60579e-37	81.318
KRT81	6.66037	-2.71051	25.0918	5.73623e-39	6.68311e-36	77.8872
TGM5	8.33472	-5.16005	24.6781	1.80743e-38	1.9654e-35	76.0576
DNAH11	7.22216	-0.364184	24.1596	7.77952e-38	7.46422e-35	75.774
GPR87	8.29885	-3.19672	24.1725	7.50046e-38	7.46422e-35	75.5437
CDH23	4.85019	0.457138	23.8073	2.12657e-37	1.92703e-34	74.7974
C6orf223	5.86414	2.3866	23.6456	3.386e-37	2.90679e-34	74.3881
MCHR1	7.31831	-2.32098	23.3955	6.98827e-37	5.69928e-34	73.4468
B4GALNT4	7.63372	-2.66243	23.1721	1.34146e-36	1.04193e-33	72.7776
CASP14	11.0008	-3.66174	22.403	1.31368e-35	9.31629e-33	70.5179
SYT8	8.6894	-3.37867	22.2585	2.03026e-35	1.37982e-32	70.0903
FABP7	9.06999	-3.65866	22.1382	2.92074e-35	1.90561e-32	69.7152
FKBP9P1	2.85617	1.77595	21.7534	9.44439e-35	5.70546e-32	68.7866
DAPK2	3.86799	2.30976	21.661	1.25469e-34	7.30902e-32	68.5308
HTR6	6.67813	-5.72705	22.435	1.19342e-35	8.84813e-33	68.5305
SLC1A6	9.04324	-4.26245	21.7557	9.37708e-35	5.70546e-32	68.4763
MTCP1	2.71025	0.262182	20.5193	4.51435e-33	2.53909e-30	64.7122
TGM1	4.92553	1.29818	20.4094	6.42103e-33	3.49112e-30	64.6138
CRHR1	7.33238	-2.95611	20.1169	1.64997e-32	8.68149e-30	63.4941
HILPDA	5.40882	2.92752	19.9246	3.08462e-32	1.57229e-29	63.054
ST8SIA4	5.10201	2.55198	19.9079	3.25765e-32	1.61017e-29	62.9994
PADI1	7.97638	-3.0658	19.416	1.64619e-31	7.89735e-29	61.2741
SPAG4	3.84134	1.09273	19.0771	5.10648e-31	2.37977e-28	60.26
KRT17	7.82117	1.55147	18.7379	1.60675e-30	7.27994e-28	59.121
GRIK3	7.31542	-0.968688	18.6451	2.20397e-30	9.71591e-28	58.7996
PTHLH	4.97533	-1.09571	18.5862	2.69453e-30	1.15659e-27	58.5306
LGI4	4.45477	2.07729	18.5431	3.12291e-30	1.3061e-27	58.4533
CACNB1	2.52166	0.984566	18.0649	1.62606e-29	6.63065e-27	56.784
PNCK	7.08634	-1.72207	17.97	2.26308e-29	9.00321e-27	56.4756
RAB42	4.04653	-1.00257	17.7572	4.76944e-29	1.85225e-26	55.6048
GJC1	3.64381	2.79265	17.6255	7.58792e-29	2.87829e-26	55.2626
FOXJ3	2.42965	6.15335	17.5445	1.01057e-28	3.74624e-26	54.9815
ATP13A4	4.50075	0.1989	17.2229	3.17609e-28	1.15123e-25	53.8674
DUOX1	4.1522	0.756897	17.1998	3.45062e-28	1.22355e-25	53.7834
PDLIM4	3.53018	3.03125	17.1774	3.7389e-28	1.29756e-25	53.6673
RIMKLA	2.95974	3.08029	17.1371	4.32087e-28	1.46829e-25	53.5225
CD300A	4.36917	1.50724	17.0379	6.17379e-28	2.05512e-25	53.1895
SYTL1	3.50924	0.939247	17.02	6.58609e-28	2.14851e-25	53.1428
LEFTY1	6.43606	-0.0399851	16.9073	9.89695e-28	3.16528e-25	52.7342
VNN2	4.29929	1.66032	16.6358	2.65702e-27	8.33434e-25	51.731
NTSR1	6.20988	-0.898539	16.5209	4.04613e-27	1.22216e-24	51.3402
NR0B1	6.6855	-4.98843	16.6214	2.80013e-27	8.61754e-25	51.0922
SEMA5B	4.38824	3.5498	16.3529	7.50547e-27	2.22585e-24	50.6788
HLA-G	4.12667	1.58285	16.2825	9.73756e-27	2.83624e-24	50.4385
COL21A1	4.19287	1.20998	16.1717	1.46794e-26	4.20062e-24	50.0392
ATP2B2	5.11402	0.239963	15.959	3.24237e-26	9.11834e-24	49.2625
NMU	6.53066	-5.13773	15.9046	3.97507e-26	1.09894e-23	48.4646
TGFA	3.46843	5.99215	15.6541	1.01974e-25	2.77215e-23	48.0901
HEY2	2.61855	2.69111	15.6315	1.11081e-25	2.97024e-23	47.9961
FXYD3	6.11742	2.40846	15.3966	2.70965e-25	7.01542e-23	47.1218
SCN5A	3.93924	-1.60367	15.4141	2.53462e-25	6.66809e-23	47.0883
PLXDC1	3.39134	3.00996	15.3889	2.79037e-25	7.11152e-23	47.0564
FLJ23867	2.98285	3.37457	15.2844	4.15874e-25	1.04359e-22	46.6512
CCL18	8.00084	-2.88951	15.2567	4.62286e-25	1.14248e-22	46.6369
MESP1	3.16632	-0.302268	15.2094	5.54182e-25	1.34914e-22	46.4239
TMPRSS3	4.13546	3.46302	15.1277	7.58319e-25	1.81896e-22	46.0634
DLX5	4.82438	-2.24035	14.5876	6.16459e-24	1.45726e-21	43.9927
COL5A3	3.99417	1.14693	14.5213	7.99263e-24	1.8624e-21	43.7624
BRCC3	-1.74225	4.88646	-14.4255	1.16457e-23	2.67538e-21	43.4312
CCDC183	3.99457	-1.61324	14.2908	1.98132e-23	4.42702e-21	42.8402
COL17A1	6.34105	-1.15655	14.2718	2.13516e-23	4.70629e-21	42.8237
PRELID2	2.16471	1.14589	14.2416	2.40685e-23	5.23441e-21	42.7208
KRT15	5.65025	-3.43841	14.1961	2.88207e-23	6.18546e-21	42.3991
CDKN2A	5.49534	-3.15359	14.1814	3.05448e-23	6.47035e-21	42.3662
CD47	1.50963	6.668	14.1772	3.10584e-23	6.49479e-21	42.35
CFAP74	5.01045	-5.23709	14.331	1.69026e-23	3.82914e-21	42.2207
NPTX2	5.10193	-0.688224	14.0615	4.91804e-23	1.01542e-20	42.0019
TFR2	5.50713	-3.21867	14.0434	5.28687e-23	1.07793e-20	41.8285
LPCAT1	3.19954	5.81741	13.8559	1.11784e-22	2.22354e-20	41.089
MAP2	2.6674	4.49436	13.864	1.08224e-22	2.17931e-20	41.0846
GRM8	3.00097	0.993794	13.7664	1.60106e-22	3.14636e-20	40.8188
TMEM74B	2.84653	-1.04009	13.7553	1.67395e-22	3.25045e-20	40.698
NDUFA4L2	6.07311	3.80365	13.73	1.85372e-22	3.55718e-20	40.6111
FGF11	4.15641	3.06388	13.6528	2.52878e-22	4.79616e-20	40.2564
CDK19	1.92705	5.36969	13.6442	2.61851e-22	4.90926e-20	40.1994
PVT1	4.19001	-1.84113	13.6002	3.12755e-22	5.79698e-20	40.1271
ECE1	1.96751	7.47873	13.4791	5.1038e-22	9.35372e-20	39.585
EGLN3	5.17954	5.06144	13.4457	5.84484e-22	1.04764e-19	39.4665
KCTD11	1.83302	4.3888	13.4522	5.69284e-22	1.03173e-19	39.4139
LZTS1	3.24901	3.27679	13.4416	5.94235e-22	1.05354e-19	39.3877
ZNF350	1.50664	3.68296	13.4139	6.65139e-22	1.16657e-19	39.2898
DNAJB13	4.0597	-1.62948	13.3614	8.23178e-22	1.42839e-19	39.1903
PGF	3.80203	2.75719	13.3122	1.00604e-21	1.72732e-19	38.873
PDE4C	2.64204	1.60264	13.2711	1.18936e-21	1.99996e-19	38.8008
HK2	4.15908	3.06251	13.2849	1.12418e-21	1.91005e-19	38.7642
SGPP1	-2.6884	6.30887	-13.2634	1.22714e-21	2.04243e-19	38.7566
PFKFB4	3.16103	2.48573	13.2147	1.49733e-21	2.46697e-19	38.489
CDSN	4.45368	-1.57956	13.1509	1.94374e-21	3.17044e-19	38.3695
CHST14	2.08755	4.60884	13.0985	2.40907e-21	3.85239e-19	37.9721
BARX2	3.23602	3.06841	13.049	2.95166e-21	4.67423e-19	37.7885
DDB2	1.9813	3.53914	13.0153	3.39033e-21	5.31728e-19	37.6518
SNX33	1.60011	5.21329	12.9312	4.79338e-21	7.44618e-19	37.2824
SOX11	5.24978	-3.05936	12.8792	5.93827e-21	9.05225e-19	37.2047
MAN1A1	-2.35635	7.75993	-12.9048	5.34436e-21	8.22375e-19	37.1768
RTP4	2.30096	2.43249	12.7772	9.05179e-21	1.36707e-18	36.7264
SAP30	2.10463	1.92278	12.6988	1.2527e-20	1.87457e-18	36.4599
S1PR5	3.42405	-0.294659	12.6744	1.38599e-20	2.05517e-18	36.4326
CDH8	4.91249	-3.44552	12.6439	1.5734e-20	2.31205e-18	36.1747
NT5DC3	3.22134	3.36052	12.6168	1.7611e-20	2.56476e-18	35.9967
RASD2	3.59489	0.691938	12.5279	2.54963e-20	3.64798e-18	35.7654
AMZ1	3.84416	-3.05291	12.5451	2.37391e-20	3.42662e-18	35.6877
RSPH9	3.01225	-1.48701	12.4358	3.74467e-20	5.31125e-18	35.3822
TNFRSF4	3.78741	-0.603175	12.4146	4.09196e-20	5.75379e-18	35.3608
ABCB1	-4.01857	6.89744	-12.4083	4.20179e-20	5.85772e-18	35.2985
ELOVL2	3.87535	-1.11582	12.215	9.45189e-20	1.28475e-17	34.5388
POLR1E	1.24314	3.80903	12.2588	7.86004e-20	1.08648e-17	34.5227
RIN1	2.73665	1.225	12.2238	9.10651e-20	1.2482e-17	34.5025
ANO1	3.35094	4.18239	12.1806	1.09222e-19	1.47232e-17	34.1757
AGAP2-AS1	2.19369	1.66346	12.1156	1.43586e-19	1.90409e-17	34.0475
GRHL3	4.76757	-0.848603	12.0675	1.75914e-19	2.31398e-17	33.8891
AMD1	1.79983	7.26177	12.0271	2.08635e-19	2.72244e-17	33.5663
CDH16	-3.00491	10.1169	-12.008	2.26198e-19	2.92819e-17	33.4455
CTHRC1	4.22855	1.28726	11.9215	3.26172e-19	4.18913e-17	33.1507
CCND1	2.5539	7.74761	11.8599	4.23637e-19	5.39839e-17	32.8957
RNF39	2.52474	-0.520116	11.7529	6.67522e-19	8.44027e-17	32.6042
MARCH4	4.0839	-2.25776	11.6775	9.20048e-19	1.15438e-16	32.264
TRIM17	2.89766	-1.09089	11.6739	9.34531e-19	1.15478e-16	32.2618
ADRA1B	2.8024	2.02086	11.6753	9.29007e-19	1.15478e-16	32.1136
PPP1R3G	2.04414	0.500463	11.5377	1.6717e-18	2.0018e-16	31.7019
YPEL4	2.98457	-1.49659	11.5363	1.68136e-18	2.0018e-16	31.6645
EPN2	1.09342	5.47116	11.5916	1.32789e-18	1.62852e-16	31.6518
LRRC17	2.23642	1.68836	11.5427	1.63631e-18	1.98653e-16	31.6191
PLEKHN1	3.83939	-1.6903	11.5113	1.87186e-18	2.21246e-16	31.5891
CTSH	-2.74429	8.26925	-11.5416	1.64418e-18	1.98653e-16	31.4435
LHX9	4.25102	-4.68136	11.4724	2.21049e-18	2.59391e-16	31.0779
ALDH1A2	2.20017	6.01382	11.4019	2.9907e-18	3.45967e-16	30.8771
SLC15A4	1.33925	4.89311	11.4057	2.94242e-18	3.42812e-16	30.8563
C3orf67	2.05546	0.29856	11.2336	6.16919e-18	6.93971e-16	30.4174
NOL3	2.25421	3.39891	11.2878	4.8835e-18	5.57026e-16	30.3809
OAZ2	0.864629	6.85241	11.2891	4.85702e-18	5.57026e-16	30.3803
THG1L	1.13151	2.80838	11.2514	5.71178e-18	6.46978e-16	30.3457
FCHO1	3.42172	-0.637992	11.1775	7.85678e-18	8.71782e-16	30.1712
LURAP1L	2.53715	3.37584	11.1918	7.38701e-18	8.25271e-16	29.9604
BMP8A	2.48033	1.73462	11.1584	8.53196e-18	9.30889e-16	29.9496
SH3RF2	2.813	1.5243	11.1545	8.67483e-18	9.30889e-16	29.9313
FBXO41	2.58053	1.16707	11.1407	9.20842e-18	9.77751e-16	29.9258
KIAA1211L	1.6572	3.54651	11.1753	7.93172e-18	8.7415e-16	29.909
PODNL1	3.4818	-1.37763	11.0996	1.09968e-17	1.14371e-15	29.8494
FAM57A	2.51288	3.34968	11.1567	8.59252e-18	9.30889e-16	29.8101
ZNF248	1.3028	4.0777	11.1556	8.6338e-18	9.30889e-16	29.8071
TNFRSF10C	2.42998	2.43402	11.1401	9.23142e-18	9.77751e-16	29.8022
GDF6	4.38574	-0.132183	11.1022	1.08722e-17	1.14371e-15	29.7651
KCNK15	3.7671	-0.0659145	11.0841	1.17594e-17	1.21398e-15	29.7126
PTGER3	-4.59326	8.19879	-11.0993	1.10087e-17	1.14371e-15	29.671
ADAMTS7	2.84079	1.11004	11.0451	1.39205e-17	1.41911e-15	29.5031
GPR176	1.83892	2.72354	11.0546	1.3358e-17	1.37033e-15	29.4472
STC2	4.93226	2.5073	11.0347	1.45592e-17	1.4659e-15	29.316
C5orf46	5.39374	-5.66779	11.0395	1.42633e-17	1.44502e-15	29.291
ADGRG2	5.45325	0.353681	10.9924	1.74835e-17	1.73886e-15	29.204
EPHA3	2.58067	2.5023	10.9987	1.70133e-17	1.70247e-15	29.1803
EDA2R	2.27009	1.95781	10.9449	2.14787e-17	2.08535e-15	29.0194
LRRC14B	4.35825	-3.58361	10.9261	2.3309e-17	2.23643e-15	29.0185
PDGFD	2.52915	4.9893	10.9718	1.91187e-17	1.88997e-15	29.0059
COL23A1	4.22826	1.53158	10.9501	2.10045e-17	2.05153e-15	28.9805
MBD1	0.793911	5.63324	10.9562	2.04549e-17	2.00988e-15	28.9156
ANKS1A	2.22809	6.20579	10.9382	2.21168e-17	2.1346e-15	28.8845
TRIM9	2.29937	1.15376	10.8452	3.3106e-17	3.08567e-15	28.6818
AHNAK2	4.04568	3.22633	10.89	2.72558e-17	2.59661e-15	28.6688
DGKD	2.12019	3.65885	10.889	2.73814e-17	2.59661e-15	28.6484
DGCR5	4.59497	0.61731	10.8369	3.43318e-17	3.18174e-15	28.5435
ALDH1A1	-1.65301	8.91757	-10.8644	3.04583e-17	2.87171e-15	28.5427
HPCAL1	2.13409	6.26507	10.851	3.22836e-17	3.02631e-15	28.5061
DYRK3	1.30156	3.03445	10.7894	4.22013e-17	3.88896e-15	28.3113
RDH10	-3.78299	6.82567	-10.7593	4.81145e-17	4.33589e-15	28.2761
ZNF395	2.4351	6.55536	10.7848	4.30543e-17	3.9406e-15	28.2384
KRBA1	1.65839	3.28432	10.783	4.33955e-17	3.9406e-15	28.2315
IRS2	1.95977	4.95904	10.7825	4.34865e-17	3.9406e-15	28.1715
CDCA7L	2.22485	3.15764	10.7429	5.16728e-17	4.63096e-15	28.0372
DUOX2	3.58337	0.151171	10.6835	6.69174e-17	5.96442e-15	27.9787
SLC25A30	-1.61522	6.66964	-10.6744	6.96329e-17	6.17273e-15	27.7176
MAP3K7CL	2.55652	2.93135	10.6558	7.55182e-17	6.65825e-15	27.6621
EPB41L4A-AS1	1.86486	4.03726	10.6308	8.42202e-17	7.38557e-15	27.5156
ARTN	2.29861	-0.0462407	10.5419	1.24183e-16	1.06608e-14	27.4607
NCKIPSD	1.48979	4.9689	10.6143	9.05049e-17	7.89425e-15	27.4318
HLX	2.32956	2.03964	10.5624	1.13525e-16	9.79742e-15	27.3513
ADGRE2	3.47243	1.86789	10.5646	1.12454e-16	9.75659e-15	27.3048
GPR37	2.91858	0.50462	10.517	1.38417e-16	1.18205e-14	27.2789
EFNA3	2.1155	0.661388	10.4673	1.7206e-16	1.45413e-14	27.1044
PTP4A3	2.40386	3.93549	10.4933	1.53547e-16	1.30443e-14	26.9139
LOC284023	1.34124	2.32421	10.4215	2.10246e-16	1.76769e-14	26.7936
KCNS1	4.01238	0.430162	10.4077	2.23349e-16	1.86823e-14	26.7141
CHST9	2.53301	3.38709	10.403	2.28e-16	1.8974e-14	26.5332
REM1	2.60432	0.47639	10.3288	3.15689e-16	2.56179e-14	26.4865
MALL	3.34279	4.30765	10.3846	2.4712e-16	2.04608e-14	26.4568
AQP3	-5.43318	8.53038	-10.3381	3.03087e-16	2.48425e-14	26.4265
FJX1	2.3133	2.44942	10.3516	2.85612e-16	2.35284e-14	26.3835
ESPNP	3.068	-1.40157	10.2759	3.98154e-16	3.15257e-14	26.3218
CSPG4	3.86209	4.79052	10.3333	3.09467e-16	2.52386e-14	26.2582
CRIP1	2.81174	4.56835	10.3196	3.28639e-16	2.6406e-14	26.1637
RBM47	-1.47827	8.11425	-10.3227	3.24279e-16	2.61847e-14	26.1622
ANK3	-2.18082	7.53713	-10.2913	3.72123e-16	2.97535e-14	26.029
IER5	1.82705	4.01546	10.2762	3.97592e-16	3.15257e-14	25.9667
PTPRU	2.71403	4.7549	10.2607	4.25568e-16	3.35335e-14	25.9071
FHOD3	-2.29973	6.12135	-10.2271	4.93327e-16	3.79559e-14	25.8688
PLEKHG2	1.97325	4.11884	10.2541	4.38209e-16	3.43636e-14	25.8642
OLFML2A	3.46772	4.87471	10.2449	4.56296e-16	3.54411e-14	25.8603
PSORS1C1	3.84034	-2.5065	10.1694	6.3569e-16	4.82267e-14	25.853
PPARD	1.57429	5.36066	10.2497	4.46759e-16	3.48665e-14	25.843
LAMA3	3.1732	3.9826	10.2358	4.74934e-16	3.6714e-14	25.7986
MREG	2.01712	2.81278	10.1859	5.91196e-16	4.50607e-14	25.6424
GPR4	2.37077	4.09091	10.2001	5.55609e-16	4.25471e-14	25.6275
POU5F1	2.77622	0.695293	10.0908	8.98389e-16	6.72185e-14	25.4143
CXXC1	1.44363	5.17906	10.151	6.89456e-16	5.20635e-14	25.4044
NGF	2.25181	0.787916	10.0722	9.75105e-16	7.22952e-14	25.3675
DGKA	2.05867	3.0555	10.1263	7.68418e-16	5.77588e-14	25.3581
HS3ST2	4.33681	-2.69057	10.0473	1.08837e-15	7.99659e-14	25.3334
EPHX4	3.333	-0.534916	10.0474	1.08783e-15	7.99659e-14	25.2994
FAM212A	1.89861	1.12265	10.0145	1.25789e-15	9.09807e-14	25.1081
PLAC9	2.6311	1.56822	10.0322	1.16329e-15	8.50874e-14	25.0584
SLC10A6	3.7892	-2.90764	9.96571	1.55954e-15	1.10599e-13	24.9538
PGBD5	1.87237	2.95596	10.0115	1.27444e-15	9.15747e-14	24.8736
FUT11	1.39829	3.83912	10.0186	1.23506e-15	8.99334e-14	24.8593
TBC1D2	1.36264	3.77373	10.014	1.2606e-15	9.09807e-14	24.8459
NOVA2	1.92428	1.25124	9.9535	1.64587e-15	1.16215e-13	24.8272
CTNND2	3.07856	-0.989397	9.92856	1.83741e-15	1.28077e-13	24.8177
STAC2	6.02826	4.11061	9.99173	1.39044e-15	9.90371e-14	24.8149
C19orf33	2.83798	2.75488	9.99506	1.37018e-15	9.80222e-14	24.7693
IDO1	3.78954	0.857113	9.95011	1.67071e-15	1.17162e-13	24.6905
RASSF8	-1.81337	6.41206	-9.94971	1.67364e-15	1.17162e-13	24.5724
KRTCAP3	2.28857	2.41637	9.91875	1.91869e-15	1.32609e-13	24.488
GIPC3	1.6598	3.38331	9.92616	1.85694e-15	1.28887e-13	24.475
SMYD2	1.17198	5.15114	9.89381	2.14209e-15	1.47425e-13	24.2693
OR51E1	3.90777	0.311713	9.83147	2.82134e-15	1.90949e-13	24.2219
LAMB2	1.58522	8.56096	9.85237	2.57239e-15	1.75557e-13	24.2033
SLC1A4	1.94684	3.47919	9.86813	2.39934e-15	1.64435e-13	24.1974
TTYH2	1.74049	2.5235	9.84092	2.70582e-15	1.83894e-13	24.1851
DIRC3	2.20199	-0.973093	9.7499	4.04672e-15	2.67231e-13	24.0479
SFTA1P	4.23493	-5.6188	9.79295	3.34501e-15	2.24214e-13	23.9451
GXYLT2	2.95021	0.0108024	9.73544	4.31414e-15	2.83742e-13	23.9187
PCCB	-1.78459	6.76412	-9.80049	3.23543e-15	2.1807e-13	23.8882
FBXL21	-6.89664	-0.28558	-10.0754	9.61513e-16	7.1613e-14	23.8419
PLSCR3	1.30494	4.58926	9.79234	3.35406e-15	2.24214e-13	23.8286
HSD11B2	-3.6972	8.84179	-9.7812	3.52352e-15	2.3458e-13	23.793
C15orf39	2.1079	4.88792	9.76355	3.80965e-15	2.52598e-13	23.7067
WDR86	3.14108	-0.212952	9.68402	5.4169e-15	3.49229e-13	23.694
NWD1	3.17534	0.96355	9.70898	4.8501e-15	3.15179e-13	23.6664
KRT86	3.06045	-2.01701	9.65986	6.02868e-15	3.81139e-13	23.6525
MAOA	-2.2182	7.58497	-9.71793	4.66183e-15	3.04156e-13	23.5046
TSPAN33	-3.39014	7.53993	-9.68969	5.28247e-15	3.41914e-13	23.4598
ABHD11-AS1	4.11043	-2.80798	9.59903	7.89344e-15	4.93294e-13	23.3913
THEMIS2	3.15423	3.1608	9.67921	5.53339e-15	3.52559e-13	23.3521
HSD17B4	-1.14405	7.62512	-9.68213	5.46236e-15	3.49531e-13	23.3375
FRMD8	1.06127	4.92499	9.68205	5.46444e-15	3.49531e-13	23.337
RFC2	0.993399	3.91774	9.66523	5.88688e-15	3.73622e-13	23.3191
OPN4	2.73113	-6.23021	9.72733	4.47184e-15	2.92933e-13	23.2809
FXYD1	2.89012	2.21664	9.62586	7.00852e-15	4.41374e-13	23.1867
RFX2	1.70108	2.13518	9.58275	8.48431e-15	5.28197e-13	23.1045
DARS	1.14136	6.79144	9.60098	7.82547e-15	4.90928e-13	23.0111
CDT1	2.80747	-0.170899	9.52067	1.1173e-14	6.8001e-13	23.0021
GAS5	1.9367	5.15421	9.58046	8.57092e-15	5.3156e-13	22.8977
CD276	1.67529	5.39148	9.57943	8.61021e-15	5.31974e-13	22.8922
PDE1B	2.15857	2.71558	9.55601	9.55223e-15	5.87949e-13	22.8692
INPP5D	2.02943	4.12881	9.52879	1.07776e-14	6.60878e-13	22.6664
CCND3	1.50038	5.9348	9.52076	1.11687e-14	6.8001e-13	22.6408
IBSP	4.57345	-5.40824	9.46358	1.43947e-14	8.53789e-13	22.6369
SLC2A1	4.11291	6.49744	9.4943	1.25601e-14	7.50431e-13	22.6312
LIG1	1.30664	3.86344	9.50876	1.17791e-14	7.14236e-13	22.6125
KCNE4	2.58794	3.31988	9.5044	1.20093e-14	7.20159e-13	22.578
TAX1BP1	-0.725303	7.72628	-9.50503	1.19756e-14	7.20159e-13	22.5655
RFLNB	1.9585	4.59409	9.50588	1.19311e-14	7.20159e-13	22.5608
HLA-F-AS1	1.64125	0.650944	9.41311	1.80099e-14	1.03436e-12	22.5432
FOXS1	2.41917	1.41904	9.44618	1.555e-14	9.12359e-13	22.518
RGS5	3.86512	8.90501	9.45028	1.52698e-14	8.99155e-13	22.5124
ANKRD37	2.08252	2.75503	9.47208	1.38613e-14	8.25153e-13	22.5001
ACSL1	-2.29294	8.78787	-9.46027	1.46076e-14	8.63277e-13	22.3611
LINGO1	2.59591	2.35307	9.43756	1.6157e-14	9.41205e-13	22.358
MAGED4B	2.14821	2.46134	9.4248	1.70989e-14	9.89008e-13	22.3153
CGNL1	-2.38919	8.71392	-9.43815	1.61146e-14	9.41205e-13	22.2602
VASH1	2.40213	4.18926	9.42932	1.67587e-14	9.72781e-13	22.227
C4orf47	2.14762	-0.572449	9.32756	2.63368e-14	1.46116e-12	22.2106
LOXL2	4.33239	4.04684	9.4138	1.7955e-14	1.03436e-12	22.2064
HR	2.27562	0.953151	9.35131	2.3699e-14	1.32382e-12	22.1794
FAM110A	1.50248	2.53476	9.37867	2.09868e-14	1.1886e-12	22.1668
ATP6V1A	-1.42836	8.6304	-9.41053	1.82174e-14	1.04261e-12	22.1559
TUBB4B	1.66507	7.69037	9.38374	2.05192e-14	1.16617e-12	22.1031
LGALS3	1.91271	6.78837	9.38587	2.03259e-14	1.15922e-12	22.0855
CHPT1	-2.09741	6.15592	-9.35466	2.33484e-14	1.31322e-12	21.996
NOTCH3	2.6263	7.2322	9.35351	2.34682e-14	1.31543e-12	21.9849
ERO1A	1.98445	5.17067	9.37181	2.16362e-14	1.22114e-12	21.9758
ASAP3	-1.56742	5.22537	-9.32099	2.71167e-14	1.49932e-12	21.9082
DLX6	3.66236	-3.79771	9.26446	3.4864e-14	1.89556e-12	21.8808
P4HA1	1.92517	5.83051	9.34649	2.42116e-14	1.34783e-12	21.8776
WHRN	1.42123	3.02401	9.30911	2.8587e-14	1.57528e-12	21.8034
ECSCR	1.62141	2.68014	9.29536	3.03893e-14	1.66793e-12	21.7652
FLNB	2.0994	9.13044	9.2808	3.24219e-14	1.76867e-12	21.7176
RSL1D1	0.773345	7.02936	9.29474	3.04728e-14	1.66793e-12	21.6522
ZNF577	1.44101	3.07929	9.26319	3.50616e-14	1.89997e-12	21.5912
F2RL3	3.67984	2.31077	9.25616	3.61749e-14	1.9538e-12	21.5128
VEGFA	3.66441	7.45808	9.23586	3.95932e-14	2.12436e-12	21.5087
DTWD2	-1.70518	4.43599	-9.18483	4.96821e-14	2.62254e-12	21.4418
DLD	-1.29173	7.58245	-9.23726	3.93472e-14	2.11813e-12	21.3648
RASL12	2.3244	3.05148	9.22117	4.22666e-14	2.26036e-12	21.3498
EHD2	3.12234	6.31073	9.21241	4.39448e-14	2.34243e-12	21.3422
PIEZO2	3.09285	2.19204	9.19223	4.80724e-14	2.5541e-12	21.2583
EBF2	3.38317	-1.01479	9.11328	6.83083e-14	3.5037e-12	21.2417
MACC1	2.02221	6.3604	9.17978	5.08106e-14	2.66486e-12	21.1595
LRRC41	0.684248	6.49986	9.18757	4.9079e-14	2.59912e-12	21.1588
SLC27A3	1.71163	3.78542	9.18156	5.04088e-14	2.65231e-12	21.1502
BICD1	1.67709	3.4902	9.17021	5.30201e-14	2.76297e-12	21.1207
TGFB1I1	1.93841	4.39782	9.17496	5.19115e-14	2.71387e-12	21.0944
GLS	-2.23857	8.75502	-9.16675	5.38432e-14	2.79693e-12	21.0603
PHYHIPL	-5.31932	5.24445	-9.05163	8.98825e-14	4.48735e-12	21.0147
TRPV2	2.21626	2.71231	9.12925	6.36211e-14	3.29436e-12	20.9796
QSOX1	1.97803	7.04259	9.11605	6.74711e-14	3.48266e-12	20.902
DPCD	1.13775	4.1542	9.11146	6.88649e-14	3.52118e-12	20.841
CD40	1.77747	4.10215	9.11479	6.78522e-14	3.49128e-12	20.8352
CP	5.66776	4.2062	9.08772	7.65407e-14	3.88927e-12	20.8116
NDUFS1	-1.6359	7.39061	-9.10609	7.05298e-14	3.59503e-12	20.7838
SEPT5	2.15391	2.9434	9.08659	7.69253e-14	3.89667e-12	20.7735
TTC39C	1.57989	2.62683	9.06587	8.43613e-14	4.24697e-12	20.7613
UBXN10	1.50981	3.69657	9.07829	7.98215e-14	4.03086e-12	20.706
SLC7A1	2.92435	6.4016	9.06163	8.59675e-14	4.31451e-12	20.6698
IL1RAP	2.496	3.26411	9.05143	8.99615e-14	4.48735e-12	20.5772
TMEM155	3.98915	-4.69255	8.97303	1.27555e-13	6.21061e-12	20.5768
PRKCDBP	2.20969	3.38226	9.04816	9.12835e-14	4.53941e-12	20.5638
ATP11A	1.93686	6.97871	9.03419	9.71426e-14	4.81609e-12	20.5351
KDM4B	1.33954	5.22922	9.02596	1.0077e-13	4.98077e-12	20.4289
MAN1B1	1.1119	6.20659	8.99847	1.13892e-13	5.61238e-12	20.3224
FRAS1	-2.29328	6.86841	-8.98751	1.19589e-13	5.87535e-12	20.3171
PKP1	3.52751	0.908381	8.94753	1.42901e-13	6.87569e-12	20.2811
TMCO4	1.87547	5.42651	8.98229	1.22405e-13	5.99562e-12	20.2506
ALPK3	2.05973	5.83703	8.97703	1.25304e-13	6.11925e-12	20.2431
FAM163A	3.68395	-2.72972	8.87347	1.98773e-13	9.3705e-12	20.2412
CCDC102B	1.32168	2.31562	8.92028	1.6135e-13	7.67283e-12	20.1926
DLL4	2.37875	4.25925	8.96939	1.29642e-13	6.29344e-12	20.1866
FHL3	1.73089	3.46746	8.95791	1.36447e-13	6.60411e-12	20.1786
C3orf70	2.70599	2.05851	8.92768	1.56114e-13	7.44553e-12	20.1234
DLX1	4.36777	-4.11377	8.84977	2.20911e-13	1.02951e-11	20.1138
PLEKHB2	-1.34244	8.53464	-8.95015	1.41242e-13	6.81599e-12	20.1132
CD200	1.81038	3.62148	8.94312	1.45735e-13	6.99143e-12	20.0986
CLCN5	-3.11782	7.66891	-8.92915	1.55095e-13	7.41862e-12	20.0562
CAMK1D	1.6557	1.30402	8.85759	2.13346e-13	9.971e-12	20.0238
TGFB1	2.35307	5.69726	8.87699	1.95676e-13	9.25124e-12	19.8039
ZFAS1	1.62871	5.20129	8.88398	1.89672e-13	8.99343e-12	19.8033
SCARF1	1.67138	3.61445	8.86103	2.10096e-13	9.87575e-12	19.7418
ACAN	4.14182	2.60504	8.85981	2.11245e-13	9.90122e-12	19.7407
GRID1	2.37053	0.0561075	8.73972	3.60786e-13	1.62563e-11	19.5817
PAPSS2	-1.86225	6.13323	-8.81331	2.59892e-13	1.20772e-11	19.5734
IGFBP3	4.50053	7.91759	8.78834	2.90483e-13	1.33467e-11	19.5726
PCDHB10	1.73773	1.59462	8.75538	3.36457e-13	1.52868e-11	19.526
ZNF532	1.4906	5.49295	8.80851	2.65509e-13	1.23032e-11	19.4709
MAGED4	2.37861	0.539167	8.72386	3.8723e-13	1.7352e-11	19.4542
PTAFR	2.62463	1.81635	8.76881	3.16915e-13	1.44391e-11	19.4512
SLC29A4	2.59421	3.35694	8.79804	2.782e-13	1.28547e-11	19.4429
SCN4B	2.30668	3.41524	8.79593	2.80823e-13	1.29393e-11	19.4378
INHBB	3.16714	2.09648	8.78078	3.00445e-13	1.37656e-11	19.4352
GJC2	2.05968	0.478471	8.70599	4.1934e-13	1.86372e-11	19.4149
CCR10	2.32372	-1.01096	8.67817	4.74712e-13	2.05386e-11	19.3851
SLCO4C1	-3.41855	6.55561	-8.7307	3.75602e-13	1.68773e-11	19.365
SYT12	3.33513	0.180194	8.70371	4.23623e-13	1.87764e-11	19.3081
PRKACB	-0.916328	6.67742	-8.77184	3.12659e-13	1.42851e-11	19.2989
FDXR	1.26795	3.53904	8.75302	3.40029e-13	1.54062e-11	19.2927
CHRNA1	3.68301	-5.27933	8.68952	4.5128e-13	1.96814e-11	19.2836
NLE1	0.808125	3.60667	8.74024	3.59956e-13	1.62563e-11	19.2693
STMN2	5.08377	-4.77929	8.63439	5.77029e-13	2.45742e-11	19.1824
LDLRAD2	1.75852	2.67581	8.71262	4.07124e-13	1.81437e-11	19.172
COL8A2	2.73864	2.30989	8.71476	4.03255e-13	1.80205e-11	19.1431
JPH2	2.80739	2.22595	8.69915	4.32321e-13	1.90583e-11	19.0841
PCDH10	3.13507	2.63994	8.70133	4.28135e-13	1.8925e-11	19.0445
NRM	1.52878	3.48162	8.69649	4.37469e-13	1.92333e-11	19.0275
SFN	3.61586	1.44715	8.67891	4.73146e-13	2.05252e-11	19.0175
DDOST	0.764975	7.72687	8.69346	4.43435e-13	1.93911e-11	19.0104
MT3	3.41933	0.460192	8.64381	5.53282e-13	2.37489e-11	19.0056
SDHAP3	1.26784	2.35659	8.64637	5.47005e-13	2.35414e-11	18.9817
SEPHS2	-1.83175	7.72165	-8.69349	4.43374e-13	1.93911e-11	18.9502
A1BG	1.62556	0.591245	8.58813	7.09213e-13	2.96937e-11	18.9271
ZNF614	1.10388	3.96614	8.67435	4.82863e-13	2.08359e-11	18.9169
FAM127C	0.876553	4.47477	8.67959	4.71707e-13	2.05174e-11	18.9158
PRG2	3.73581	-3.83796	8.56148	7.98693e-13	3.30647e-11	18.8622
PTPRR	2.34498	-0.538019	8.55069	8.3805e-13	3.45188e-11	18.8047
SSX2IP	-1.72944	5.43055	-8.62264	6.08059e-13	2.57612e-11	18.8045
RHBDF2	1.5578	3.8839	8.63736	5.6943e-13	2.43141e-11	18.7337
CYGB	2.06902	3.70336	8.63806	5.67673e-13	2.43027e-11	18.7292
PKP3	3.02319	2.07613	8.61855	6.19243e-13	2.6167e-11	18.7193
SSC5D	2.86589	3.32012	8.62665	5.97288e-13	2.53708e-11	18.681
CCNI	0.830889	8.43388	8.60436	6.59697e-13	2.78044e-11	18.6472
JAG2	2.35193	3.96012	8.59951	6.74105e-13	2.83385e-11	18.5457
NOS2	2.32096	1.13344	8.53279	9.07657e-13	3.7198e-11	18.535
CCDC127	0.998292	4.07235	8.58788	7.09984e-13	2.96937e-11	18.5301
MIR4435-2HG	2.11501	2.37663	8.56275	7.9416e-13	3.29607e-11	18.5091
GPR20	2.7087	-1.58845	8.47536	1.17251e-12	4.65323e-11	18.5078
ARHGEF25	1.73461	3.29835	8.57717	7.44707e-13	3.10663e-11	18.503
ODF3B	2.96766	0.0867896	8.49272	1.0852e-12	4.34907e-11	18.4372
SCPEP1	-1.48086	7.20438	-8.56741	7.77858e-13	3.23664e-11	18.3919
TMEM44	1.65605	2.72701	8.53481	8.99511e-13	3.6957e-11	18.3824
RAP2B	2.16143	4.55506	8.56002	8.03892e-13	3.31956e-11	18.3665
ZNF90	1.35107	2.28661	8.50706	1.01798e-12	4.13042e-11	18.3637
RPL4	0.877101	9.97468	8.52235	9.50903e-13	3.87754e-11	18.3481
PCDHB9	1.4687	1.27743	8.46887	1.20694e-12	4.77825e-11	18.3376
TMEM130	3.90028	3.73794	8.52737	9.29865e-13	3.80126e-11	18.2536
NRXN3	2.59576	2.1343	8.50306	1.03633e-12	4.18403e-11	18.2406
PTCHD4	1.9782	1.14593	8.45356	1.2922e-12	5.0788e-11	18.2222
PYGL	2.28933	4.37081	8.51722	9.72894e-13	3.95732e-11	18.1772
GEMIN8P4	-2.22546	0.242634	-8.40898	1.57631e-12	6.04969e-11	18.1382
RDH11	-1.15515	7.6364	-8.50426	1.03076e-12	4.17189e-11	18.1129
CPEB4	-1.82092	7.45821	-8.50011	1.05003e-12	4.2289e-11	18.095
HIBADH	-1.83571	7.60445	-8.49645	1.06731e-12	4.28791e-11	18.0765
UNC93B1	1.40948	4.43077	8.49004	1.09824e-12	4.39053e-11	18.0571
COL11A1	3.86912	-1.6212	8.38261	1.77291e-12	6.74076e-11	18.0556
ACAT1	-2.73189	8.4031	-8.48218	1.13739e-12	4.53594e-11	18.0162
PCDH17	2.58457	3.64053	8.4759	1.16969e-12	4.65323e-11	18.0036
PRR16	2.13394	0.0358235	8.37478	1.8359e-12	6.96404e-11	18.0017
EDN1	2.86487	4.38625	8.46313	1.23821e-12	4.89017e-11	17.9512
LAMB3	3.97023	4.72375	8.44968	1.31477e-12	5.14274e-11	17.9343
MKL1	1.01201	5.23202	8.46182	1.24546e-12	4.90693e-11	17.9208
VWA1	2.14078	6.21777	8.44454	1.34523e-12	5.24928e-11	17.8952
COLGALT1	1.62149	5.62496	8.45106	1.30671e-12	5.1235e-11	17.8899
GLYR1	-0.77264	7.42219	-8.44394	1.34883e-12	5.25076e-11	17.8475
MOB1B	-1.63293	6.97683	-8.43973	1.3744e-12	5.32489e-11	17.837
NKIRAS2	0.643815	5.3828	8.44279	1.35578e-12	5.26527e-11	17.8364
KCNIP1	3.28208	1.58481	8.40231	1.62385e-12	6.21752e-11	17.8046
ADGRA2	2.27536	5.33136	8.42639	1.45856e-12	5.62425e-11	17.7906
MARVELD1	2.03645	4.24697	8.42687	1.45547e-12	5.62425e-11	17.7745
H19	5.74136	6.99038	8.36949	1.87968e-12	7.11357e-11	17.7246
LAYN	1.86807	2.81349	8.38956	1.71883e-12	6.55042e-11	17.7081
DOCK6	1.49798	5.54762	8.40928	1.57419e-12	6.04969e-11	17.6996
SLC17A9	2.41789	-0.392966	8.28615	2.72513e-12	9.98868e-11	17.6328
FILIP1	1.79584	2.70028	8.36527	1.91541e-12	7.21529e-11	17.6242
CYSTM1	-1.69181	7.8316	-8.39022	1.71381e-12	6.54658e-11	17.6036
SLC22A2	-6.81491	7.49256	-8.25793	3.09019e-12	1.11513e-10	17.5409
RLF	1.03288	4.73749	8.36737	1.8975e-12	7.1644e-11	17.5112
C8orf58	1.03096	3.3735	8.34002	2.14348e-12	8.00054e-11	17.5014
ANXA2P1	1.59179	0.711871	8.26395	3.00849e-12	1.09291e-10	17.4909
TMEM45A	2.73844	2.12663	8.33551	2.18705e-12	8.1445e-11	17.479
ATP6V1H	-1.09992	6.88521	-8.35973	1.96323e-12	7.3784e-11	17.4687
GUCY1B3	1.65525	5.20365	8.35707	1.98664e-12	7.4492e-11	17.4644
EPB41L5	-1.54531	6.5178	-8.34772	2.07116e-12	7.74833e-11	17.4492
EIF3D	0.696957	7.48652	8.32847	2.25674e-12	8.38488e-11	17.3786
POLR3C	0.5881	4.39271	8.32466	2.29536e-12	8.509e-11	17.3629
ADAM18	3.24045	-6.36825	8.26989	2.92988e-12	1.06672e-10	17.3342
SFRP2	4.52057	3.03821	8.30153	2.54462e-12	9.34804e-11	17.2697
MEIS3	2.32932	0.932939	8.23948	3.35493e-12	1.19742e-10	17.2656
GFM1	-1.20276	6.48663	-8.30613	2.49297e-12	9.19975e-11	17.2478
MED6	0.67797	3.51313	8.27609	2.85001e-12	1.0423e-10	17.2369
ADCY3	2.04878	4.87508	8.3039	2.51784e-12	9.27055e-11	17.232
ISCU	-1.11917	7.40434	-8.30632	2.49088e-12	9.19975e-11	17.2311
IL3RA	1.891	2.8009	8.27339	2.88457e-12	1.05258e-10	17.1944
RPL10A	1.21315	8.49701	8.25237	3.16766e-12	1.13806e-10	17.1034
ESRRG	-3.63263	6.5395	-8.21617	3.72203e-12	1.30965e-10	17.1031
HAPLN1	4.60552	-0.77443	8.20246	3.95638e-12	1.38482e-10	17.0965
CHUK	-1.0955	5.54438	-8.25305	3.1582e-12	1.13716e-10	17.076
TMEM107	0.792156	3.75253	8.24828	3.22604e-12	1.15648e-10	17.0713
GLI2	2.30572	1.095	8.19552	4.08067e-12	1.41918e-10	17.054
FSCN1	1.89451	5.29197	8.26027	3.05818e-12	1.10603e-10	17.0428
AAED1	1.03708	3.03919	8.22476	3.58231e-12	1.26748e-10	17.0357
KSR1	1.36664	5.28721	8.26033	3.05729e-12	1.10603e-10	17.0311
ZNF615	1.01831	4.04751	8.24075	3.33601e-12	1.19328e-10	16.9914
KLHL13	-2.44115	5.72167	-8.19876	4.02214e-12	1.40182e-10	16.9885
LAMA4	3.37609	4.84276	8.23121	3.48088e-12	1.23966e-10	16.9465
RAB38	0.951359	2.47972	8.17729	4.42585e-12	1.5327e-10	16.9293
OLFML2B	2.82864	3.38125	8.22699	3.54697e-12	1.25771e-10	16.9059
SAP30BP	0.717264	5.35077	8.22861	3.52136e-12	1.25135e-10	16.8862
TMEM185A	0.76664	4.69535	8.22233	3.62128e-12	1.2785e-10	16.8792
GALNT12	1.23588	3.6518	8.20633	3.88879e-12	1.36409e-10	16.8581
NPDC1	2.01672	4.46108	8.21596	3.72557e-12	1.30965e-10	16.8374
CHSY3	2.56761	0.185044	8.12256	5.64699e-12	1.91892e-10	16.8334
AAGAB	-0.914094	5.88828	-8.20036	3.99352e-12	1.39483e-10	16.7988
KCNJ15	-5.45966	7.48677	-8.1053	6.09811e-12	2.06361e-10	16.7453
TMEM255B	1.94012	1.62028	8.13182	5.41911e-12	1.85306e-10	16.7353
NR2C2AP	0.942097	3.2112	8.15923	4.79645e-12	1.64359e-10	16.7326
COPZ2	1.07163	3.22763	8.16259	4.72512e-12	1.62306e-10	16.7318
AP5M1	-0.972024	6.15172	-8.1791	4.39018e-12	1.52358e-10	16.6911
C14orf105	-1.64771	6.34243	-8.16647	4.64425e-12	1.60153e-10	16.6659
SFXN3	2.06838	5.41962	8.17363	4.49849e-12	1.55455e-10	16.6659
PI4K2A	-0.796663	5.87141	-8.16252	4.7266e-12	1.62306e-10	16.6251
ANGPTL4	5.11111	3.98761	8.12869	5.49513e-12	1.87513e-10	16.5338
CCDC141	2.35375	-1.26326	8.01385	9.1609e-12	2.99446e-10	16.4982
NRARP	2.04268	3.20812	8.12568	5.56929e-12	1.89646e-10	16.4906
SLCO1C1	2.83474	-2.68166	8.00249	9.63533e-12	3.11829e-10	16.4655
CYP4V2	-1.76186	6.6915	-8.11971	5.7193e-12	1.93945e-10	16.4409
FAM19A5	3.0043	0.691799	8.05513	7.62358e-12	2.53772e-10	16.4208
KRBOX4	0.720886	3.31767	8.08561	6.6567e-12	2.23699e-10	16.4193
RPS8	1.36392	9.05892	8.08423	6.69768e-12	2.24324e-10	16.3883
RPL10	1.25206	8.87624	8.08532	6.6653e-12	2.23699e-10	16.3814
HSPA6	2.69472	1.0766	8.04054	8.13514e-12	2.68608e-10	16.329
AFAP1L1	1.57575	4.18366	8.09804	6.29848e-12	2.12261e-10	16.325
EFHD1	-2.28983	8.16734	-8.10139	6.20525e-12	2.09552e-10	16.3246
EXOC3L1	1.75851	2.48759	8.05955	7.47522e-12	2.49342e-10	16.3084
P3H3	1.66817	3.68527	8.07656	6.93013e-12	2.31634e-10	16.2554
BTF3	0.850323	8.23078	8.05157	7.74556e-12	2.56784e-10	16.1898
SNHG1	1.5476	3.31564	8.04198	8.08319e-12	2.67434e-10	16.1431
WWP1	-0.797689	6.80397	-8.05441	7.64814e-12	2.54071e-10	16.113
SYTL2	2.29078	6.29641	8.019	8.9531e-12	2.93831e-10	16.0188
LDLRAD3	1.66192	2.6519	7.99687	9.87932e-12	3.17834e-10	16.0124
ACBD5	-1.35291	6.58749	-8.02494	8.71972e-12	2.87328e-10	16.0045
SFTA2	3.57045	0.10811	7.95903	1.169e-11	3.70244e-10	16.0018
NETO2	1.90998	2.85099	8.00469	9.54176e-12	3.10031e-10	15.9979
ZMPSTE24	-0.754662	7.03728	-8.02428	8.74539e-12	2.87593e-10	15.9804
RPL23A	1.0868	7.16086	8.00971	9.3308e-12	3.04389e-10	15.968
SKI	1.13846	6.30936	8.01543	9.09667e-12	2.97943e-10	15.9649
DIRAS2	1.94242	1.96121	7.968	1.12329e-11	3.57851e-10	15.9539
APBB2	1.14035	6.643	8.0028	9.6224e-12	3.11829e-10	15.9196
SARM1	0.930782	4.82378	8.0082	9.39386e-12	3.05835e-10	15.9194
FXYD5	2.72149	4.65968	7.99918	9.77843e-12	3.15834e-10	15.8954
FAM102A	-2.08565	6.79243	-7.99251	1.0073e-11	3.2279e-10	15.8931
TMEM173	1.82135	4.84358	7.99772	9.84216e-12	3.17264e-10	15.8703
FAM107B	-1.3033	8.27417	-7.99507	9.95879e-12	3.19759e-10	15.8697
ECEL1	4.25766	-0.469714	7.91494	1.42208e-11	4.46067e-10	15.8363
PPM1B	-0.5952	6.08122	-7.97691	1.07967e-11	3.45304e-10	15.7821
KCNH8	2.97796	-3.10706	7.84166	1.96934e-11	5.9375e-10	15.7707
ZBTB42	1.08526	3.81535	7.95919	1.16814e-11	3.70244e-10	15.7609
HSDL2	-1.30243	7.20834	-7.97324	1.09742e-11	3.50294e-10	15.7552
EFEMP2	1.54816	6.01342	7.96487	1.13905e-11	3.62164e-10	15.7441
SLC16A12	-3.9506	7.56473	-7.9221	1.37759e-11	4.32946e-10	15.7115
CPNE2	1.31231	5.0903	7.95467	1.19188e-11	3.76758e-10	15.675
RASGRF1	3.6581	-0.184987	7.87167	1.72358e-11	5.25483e-10	15.6721
KIF21A	-2.4814	5.8225	-7.90189	1.50703e-11	4.67454e-10	15.6666
SOWAHA	-5.19199	3.88901	-7.81177	2.24885e-11	6.74284e-10	15.6388
HNRNPA1L2	0.730809	6.63031	7.94003	1.27204e-11	4.0132e-10	15.6299
CARD16	1.73199	1.9514	7.8841	1.631e-11	5.01948e-10	15.6161
C10orf105	2.7138	-1.83145	7.80022	2.36722e-11	7.04594e-10	15.583
MYCT1	1.24978	4.48855	7.92996	1.33024e-11	4.18872e-10	15.5777
VSIG1	3.4603	-2.3929	7.79747	2.39624e-11	7.10638e-10	15.5683
ABCC4	-2.05542	6.20257	-7.90338	1.49709e-11	4.66013e-10	15.5576
SEPT9	1.24582	7.68342	7.90183	1.50745e-11	4.67454e-10	15.5197
SNHG7	1.56909	4.17971	7.91198	1.44095e-11	4.5112e-10	15.5023
CRYZ	-1.30685	8.24594	-7.91042	1.45097e-11	4.53387e-10	15.4947
GOT2	-1.18786	7.78952	-7.90785	1.46763e-11	4.57714e-10	15.4733
NR2F1-AS1	1.53579	3.19153	7.88171	1.64838e-11	5.06341e-10	15.4477
GJA1	3.1152	5.86106	7.88525	1.62266e-11	5.00326e-10	15.4422
PPP1R13L	1.94442	4.14411	7.89906	1.52611e-11	4.72342e-10	15.4391
CLEC14A	1.98284	5.31339	7.89126	1.57988e-11	4.88058e-10	15.4127
CDR2	-1.12765	5.48759	-7.87442	1.70262e-11	5.21041e-10	15.4114
TPSB2	4.55111	1.22836	7.86169	1.80175e-11	5.4727e-10	15.3847
CRYL1	-2.72614	7.98363	-7.87708	1.68266e-11	5.15901e-10	15.3482
SHF	1.02597	2.06183	7.79791	2.39154e-11	7.10535e-10	15.3196
POLE3	0.652806	5.64013	7.87269	1.71581e-11	5.24094e-10	15.3099
ULK1	1.3384	5.60844	7.86916	1.74291e-11	5.30385e-10	15.3053
PLP2	2.28049	5.43293	7.85919	1.82187e-11	5.5165e-10	15.2825
RAB3IP	-1.30951	6.59618	-7.85905	1.82294e-11	5.5165e-10	15.2689
SCG2	2.64796	-0.82803	7.74021	3.08943e-11	8.99851e-10	15.2689
PLA2G7	3.74994	-1.55177	7.73961	3.09773e-11	9.00661e-10	15.2456
GJA4	1.84936	4.697	7.84683	1.92463e-11	5.81346e-10	15.2032
OS9	0.742059	8.66332	7.81589	2.2081e-11	6.64508e-10	15.1638
SLC16A3	3.13453	4.93584	7.81043	2.26226e-11	6.7582e-10	15.0807
TRIM21	0.896169	4.41394	7.81097	2.25686e-11	6.75442e-10	15.0708
PML	1.17007	5.88336	7.81424	2.22434e-11	6.68163e-10	15.0654
IPO13	-1.64664	6.2231	-7.80099	2.3591e-11	7.03461e-10	15.0613
LRRC4C	2.70212	-0.448676	7.69532	3.76998e-11	1.07316e-09	15.0228
CDKN2B	2.50879	1.94712	7.75053	2.95121e-11	8.65776e-10	14.9317
TREM2	3.01469	-0.0757891	7.691	3.84288e-11	1.08633e-09	14.9283
PTPRM	1.22127	6.87494	7.77322	2.66849e-11	7.8851e-10	14.9174
PTK2B	-1.08243	5.55661	-7.76498	2.76789e-11	8.16302e-10	14.9166
RPL15	0.938549	9.65417	7.74838	2.97946e-11	8.72495e-10	14.9162
SGCE	1.00487	5.20626	7.78212	2.56515e-11	7.5935e-10	14.9116
ARHGDIB	2.05228	6.64607	7.7646	2.77255e-11	8.16302e-10	14.9011
GAL3ST4	2.06881	1.24012	7.70199	3.66007e-11	1.04552e-09	14.8936
ZNF581	0.926635	3.50196	7.74039	3.08703e-11	8.99851e-10	14.8464
TFDP2	-1.27677	4.59364	-7.70282	3.64669e-11	1.04353e-09	14.8118
BCL6B	1.77734	4.44217	7.75606	2.87969e-11	8.46318e-10	14.8032
SLC27A4	-1.31709	5.61216	-7.73415	3.17362e-11	9.21083e-10	14.7985
VILL	1.27784	2.64558	7.705	3.61158e-11	1.0353e-09	14.7743
DEFB1	-3.27723	8.39311	-7.7431	3.05004e-11	8.91564e-10	14.7634
NCSTN	0.606919	7.54215	7.73177	3.20722e-11	9.27534e-10	14.7395
NMUR1	2.05638	0.927455	7.64976	4.6134e-11	1.27325e-09	14.722
HIP1R	-1.25579	6.63139	-7.73344	3.18356e-11	9.22329e-10	14.7108
TCAF2	1.15185	3.44481	7.71161	3.5073e-11	1.00895e-09	14.7008
SNHG12	1.7332	1.02078	7.63472	4.93128e-11	1.35411e-09	14.6803
ABT1	0.739449	4.39975	7.71986	3.38128e-11	9.74419e-10	14.6791
FBLN7	2.17115	0.958754	7.64252	4.76371e-11	1.31251e-09	14.6685
ARHGAP24	-1.54423	7.69947	-7.72571	3.29463e-11	9.51126e-10	14.6632
HN1L	1.57294	7.1174	7.70601	3.5954e-11	1.03248e-09	14.6445
NPM1	0.887227	8.49616	7.69404	3.79133e-11	1.0767e-09	14.6255
LOC143666	1.97478	0.689166	7.61224	5.44736e-11	1.4784e-09	14.5964
DGCR2	0.848397	7.26189	7.69904	3.70829e-11	1.05745e-09	14.5926
AIFM1	-2.82447	7.01742	-7.6826	3.9885e-11	1.12554e-09	14.5727
GPNMB	2.79268	6.9117	7.68053	4.02527e-11	1.13396e-09	14.5713
RPS24	1.10866	8.98496	7.67399	4.1437e-11	1.1633e-09	14.5667
MICALL2	1.55843	2.60579	7.66243	4.36145e-11	1.20986e-09	14.5579
HEYL	2.87248	4.92544	7.69379	3.7956e-11	1.0767e-09	14.5571
GDF11	1.2045	3.08801	7.66694	4.27524e-11	1.19202e-09	14.5503
PRR13	-1.1313	7.75645	-7.69175	3.82997e-11	1.08456e-09	14.5205
CLEC1A	1.52328	2.08457	7.62883	5.06166e-11	1.38525e-09	14.5016
CEP85	-1.51723	3.43233	-7.57799	6.33927e-11	1.68954e-09	14.4891
CALCRL	1.67686	6.08765	7.67881	4.05609e-11	1.14067e-09	14.4882
PLBD1	-1.0133	5.53616	-7.66822	4.25105e-11	1.18731e-09	14.4868
PPM1F	1.23539	5.37539	7.67217	4.17728e-11	1.17072e-09	14.4301
MRPS35	-1.06473	6.6725	-7.67035	4.21102e-11	1.17815e-09	14.4243
E2F1	2.31464	0.262252	7.56541	6.70222e-11	1.78045e-09	14.4111
RFX5	-0.8356	5.60763	-7.65297	4.54828e-11	1.25741e-09	14.3972
RNF149	1.12703	5.42663	7.66352	4.34054e-11	1.20817e-09	14.391
GOT1	-1.79611	7.72084	-7.66305	4.34962e-11	1.20863e-09	14.3875
DUSP7	1.42274	4.3494	7.65939	4.42075e-11	1.22422e-09	14.386
TCN1	4.57231	-4.96742	7.51818	8.25915e-11	2.13494e-09	14.3801
C9	-4.10684	-0.10514	-7.55407	7.04709e-11	1.86206e-09	14.3517
C4orf3	0.764786	7.73993	7.64015	4.814e-11	1.32413e-09	14.3506
SHC2	1.5594	3.25364	7.63291	4.97095e-11	1.36271e-09	14.3441
B9D2	0.989094	2.67852	7.59891	5.77862e-11	1.5528e-09	14.3436
TPSAB1	4.18802	0.76428	7.60543	5.61429e-11	1.51865e-09	14.3163
SIX1	2.4472	-1.59419	7.50047	8.93168e-11	2.29424e-09	14.2869
SLITRK2	2.836	0.946522	7.56387	6.74807e-11	1.78972e-09	14.2414
TTYH1	2.974	-2.11992	7.48851	9.41665e-11	2.39992e-09	14.2399
CXorf36	2.23472	4.41378	7.62679	5.10751e-11	1.39312e-09	14.2383
C1orf115	-1.36693	6.90527	-7.62757	5.08997e-11	1.39066e-09	14.238
DYSF	1.84612	5.93733	7.61589	5.36e-11	1.45889e-09	14.212
BHLHE41	2.99576	4.40491	7.61562	5.36651e-11	1.45889e-09	14.2077
PREX2	2.30076	2.44088	7.58953	6.02357e-11	1.61596e-09	14.1908
NFATC4	1.83651	3.74743	7.60828	5.54389e-11	1.5021e-09	14.1776
TBX15	3.39598	-1.1185	7.49556	9.12788e-11	2.33362e-09	14.1687
ELMO1	1.66011	3.75105	7.60384	5.65379e-11	1.52604e-09	14.1674
KRT23	3.4484	-0.20232	7.52281	8.09167e-11	2.0983e-09	14.1617
ALDOC	3.07408	4.26799	7.60358	5.66032e-11	1.52604e-09	14.1551
BAMBI	-1.78333	4.87125	-7.54057	7.48073e-11	1.95856e-09	14.1343
FXYD2	-2.51573	9.28935	-7.60132	5.71722e-11	1.53884e-09	14.1341
DGCR9	3.02498	-0.861568	7.47397	1.00414e-10	2.53538e-09	14.091
FATE1	3.60351	-3.1839	7.44954	1.11855e-10	2.80255e-09	14.0894
WDR54	1.11142	3.75908	7.57728	6.3591e-11	1.69206e-09	14.0814
NEURL1B	2.03896	5.18763	7.58622	6.11262e-11	1.63716e-09	14.0672
RDH13	1.45291	3.91359	7.58129	6.24734e-11	1.66894e-09	14.0654
MARCH3	1.73024	0.650738	7.48168	9.70519e-11	2.45809e-09	14.0622
HIGD1B	3.24347	-0.0496137	7.49986	8.95601e-11	2.29688e-09	14.0511
PTGR1	-1.9564	7.38139	-7.58113	6.25173e-11	1.66894e-09	14.0379
C10orf25	0.956223	1.93617	7.49814	9.02436e-11	2.31078e-09	14.0354
CORO2A	2.16826	2.03538	7.53484	7.67259e-11	2.00236e-09	14.0177
ENO2	3.09374	4.41883	7.56143	6.82108e-11	1.80615e-09	13.9726
RPL38	1.17777	7.38712	7.55177	7.11892e-11	1.87493e-09	13.963
PLXND1	1.87141	6.59712	7.55152	7.12684e-11	1.87493e-09	13.955
DHX29	-0.820942	5.93878	-7.54944	7.19288e-11	1.88926e-09	13.9168
NOB1	0.642643	5.35783	7.55381	7.05506e-11	1.86206e-09	13.9071
TMEM233	2.29545	-0.421566	7.42784	1.23106e-10	3.06094e-09	13.9025
ANXA7	-0.705095	7.74489	-7.54844	7.22456e-11	1.89453e-09	13.9002
HOXD13	3.60878	-4.66439	7.39757	1.40697e-10	3.45098e-09	13.8535
FIGNL2	-2.62161	3.24777	-7.40365	1.36971e-10	3.37483e-09	13.8469
CSGALNACT1	1.60444	4.92412	7.53918	7.52666e-11	1.96743e-09	13.8466
TRAF3IP2	1.05721	4.55657	7.53094	7.80601e-11	2.02745e-09	13.8224
ARHGEF10	1.24769	5.15362	7.53325	7.72674e-11	2.01327e-09	13.8176
SETD3	-1.03957	7.31916	-7.53156	7.78473e-11	2.02515e-09	13.8089
RPL12	1.20771	8.12985	7.50134	8.89766e-11	2.28911e-09	13.7755
HTRA4	3.23134	-4.87804	7.38372	1.49565e-10	3.63028e-09	13.7705
RAMP2	1.46724	5.13117	7.52112	8.15253e-11	2.11073e-09	13.767
TREX1	0.879	3.4992	7.47717	9.90061e-11	2.5037e-09	13.6956
SC5D	-0.949405	6.44095	-7.50355	8.81116e-11	2.27403e-09	13.6953
SLC27A1	1.11858	4.73756	7.5022	8.86365e-11	2.28396e-09	13.6879
ABTB2	-3.05855	5.22979	-7.40489	1.36228e-10	3.36158e-09	13.6788
LINC01559	4.46387	-1.35853	7.40292	1.37416e-10	3.38068e-09	13.673
SACM1L	-0.963974	6.49404	-7.49426	9.18026e-11	2.34334e-09	13.6531
ACADL	-2.74023	4.65001	-7.38927	1.45947e-10	3.55305e-09	13.651
FHOD1	1.22879	4.14897	7.48257	9.66691e-11	2.45221e-09	13.6274
EDNRA	1.98761	4.08553	7.48486	9.56989e-11	2.43425e-09	13.617
PER2	1.74807	4.61162	7.48459	9.5812e-11	2.43425e-09	13.6079
TRPC4	2.05577	0.90909	7.39396	1.42959e-10	3.5012e-09	13.5982
EXOSC2	0.599506	4.0118	7.46138	1.0616e-10	2.66806e-09	13.5898
KHNYN	0.815795	5.73633	7.47225	1.01182e-10	2.55081e-09	13.5499
MCF2L	1.16099	4.89706	7.47119	1.01657e-10	2.55883e-09	13.5471
PHEX	2.80758	-2.48963	7.32295	1.95505e-10	4.64852e-09	13.5468
RPL6	0.877909	8.22559	7.44342	1.14922e-10	2.87058e-09	13.5132
DTL	2.49922	0.0602967	7.35661	1.68553e-10	4.06095e-09	13.5095
CACNB3	1.23979	3.34344	7.43824	1.1758e-10	2.93248e-09	13.5054
HVCN1	1.47816	2.34134	7.40824	1.34225e-10	3.32223e-09	13.4995
ACSL3	-1.0012	6.88391	-7.45935	1.07114e-10	2.68791e-09	13.4916
SMIM10	1.52636	2.8035	7.42079	1.26993e-10	3.14799e-09	13.4702
CACNA1F	2.74598	-2.60193	7.30265	2.13789e-10	5.01743e-09	13.4632
PTGFRN	2.03224	5.60012	7.44597	1.13635e-10	2.84278e-09	13.4621
LRRC75A	1.20411	1.26821	7.346	1.76625e-10	4.23666e-09	13.4488
TMEM38B	-2.05234	5.55584	-7.38844	1.46482e-10	3.56076e-09	13.3912
DECR1	-1.28568	7.00944	-7.43404	1.19782e-10	2.98284e-09	13.3834
PTCD3	-0.758106	5.92267	-7.421	1.26878e-10	3.14799e-09	13.351
LHX2	4.82387	-5.65531	7.27648	2.39896e-10	5.55027e-09	13.3449
SDHAF3	-1.74109	3.87992	-7.31831	1.99542e-10	4.717e-09	13.3245
C18orf54	1.45934	1.9668	7.35143	1.72446e-10	4.14862e-09	13.3118
MRPL19	-0.807638	6.50118	-7.40678	1.35092e-10	3.33862e-09	13.2648
C20orf202	1.74175	-1.11189	7.25535	2.63278e-10	6.02289e-09	13.241
ASAH1	-1.44414	8.87535	-7.39345	1.43279e-10	3.50379e-09	13.2369
PLEKHA6	-1.34287	6.79383	-7.39769	1.40625e-10	3.45098e-09	13.2325
DEPTOR	-1.3807	6.34423	-7.39042	1.45207e-10	3.54032e-09	13.2274
PRDM1	2.01229	3.01755	7.37566	1.54973e-10	3.7504e-09	13.2111
FKBP9	1.17825	7.48298	7.37864	1.52951e-10	3.70696e-09	13.2086
IL4R	1.54755	4.97956	7.39101	1.44832e-10	3.53646e-09	13.1964
VEPH1	-3.73539	5.52262	-7.28001	2.36198e-10	5.48026e-09	13.1946
BCL2L10	-5.48656	0.39181	-7.28583	2.30228e-10	5.36464e-09	13.1593
RPL22	0.656205	8.49758	7.35764	1.67788e-10	4.04851e-09	13.1413
CDCA7	2.31868	-0.439514	7.25154	2.67719e-10	6.11591e-09	13.1394
CAMSAP1	0.921611	5.12928	7.37313	1.56711e-10	3.78683e-09	13.1159
SFXN5	-1.77189	5.18916	-7.32073	1.97428e-10	4.6738e-09	13.1139
GCNT1	1.52871	2.51835	7.32688	1.92155e-10	4.57553e-09	13.1029
CBR3	1.59656	1.15028	7.27293	2.43673e-10	5.61376e-09	13.0952
ABHD3	-1.17638	4.24621	-7.2917	2.2435e-10	5.24264e-09	13.0596
VIM	2.60931	9.4961	7.31023	2.06773e-10	4.87382e-09	13.0531
KCNAB1	2.02837	2.21591	7.31498	2.02496e-10	4.77991e-09	13.0477
LINC00092	1.96233	-0.317378	7.22251	3.04178e-10	6.85282e-09	13.0329
SYDE1	1.22484	4.81542	7.34968	1.7378e-10	4.17456e-09	13.0158
SLC25A5	-1.56266	8.9712	-7.3422	1.79611e-10	4.29939e-09	13.0129
SELENOI	-1.04228	5.82207	-7.33683	1.83907e-10	4.39196e-09	13.0088
PDZK1	-3.65474	7.72492	-7.32158	1.96687e-10	4.66981e-09	13.0014
PAQR5	-1.67521	7.28334	-7.342	1.79767e-10	4.29939e-09	12.9836
RPL39L	1.38289	1.40369	7.24931	2.70365e-10	6.1591e-09	12.9829
ARHGEF39	1.32914	0.214937	7.20838	3.2367e-10	7.23202e-09	12.9722
SLC43A3	2.5038	4.46998	7.3363	1.84341e-10	4.39588e-09	12.9711
CD1D	2.22074	0.798644	7.23646	2.86084e-10	6.47201e-09	12.9099
STAU2	-0.520584	5.86108	-7.32092	1.97265e-10	4.6738e-09	12.9041
TESC	2.69218	3.52794	7.30813	2.08691e-10	4.91193e-09	12.854
TMEM43	1.08243	6.72511	7.30339	2.13096e-10	5.00836e-09	12.8449
PEX1	-0.929461	5.28539	-7.28495	2.31121e-10	5.37776e-09	12.8258
HRH1	1.91185	3.21457	7.28845	2.27582e-10	5.31057e-09	12.8142
NUDT1	1.12309	1.86143	7.21728	3.11255e-10	7.0026e-09	12.8036
PLEKHA4	2.05269	4.41948	7.29915	2.17114e-10	5.08815e-09	12.7992
A1BG-AS1	1.16199	1.06363	7.18231	3.6295e-10	8.02178e-09	12.7761
TBC1D4	-1.84546	7.2239	-7.29232	2.23744e-10	5.236e-09	12.7747
ZBTB18	-0.771011	5.28468	-7.26818	2.48826e-10	5.72046e-09	12.7368
SCML2	-2.29472	0.322956	-7.13209	4.52463e-10	9.82705e-09	12.7341
EBF1	1.64488	4.10481	7.27954	2.36687e-10	5.48382e-09	12.7255
MXI1	1.0217	6.0589	7.28098	2.35192e-10	5.4647e-09	12.7249
ALOX5	3.02713	3.07434	7.27327	2.43315e-10	5.61344e-09	12.7163
UNC5B	2.93109	5.21254	7.26801	2.49005e-10	5.72046e-09	12.7006
ADGRA3	1.19874	5.47842	7.27446	2.42036e-10	5.59186e-09	12.6875
PHLDB3	1.07016	2.43791	7.21178	3.18873e-10	7.14442e-09	12.6855
RPL14	0.967807	8.07629	7.25039	2.69079e-10	6.13838e-09	12.6668
LSR	1.53783	5.77924	7.26185	2.55855e-10	5.86956e-09	12.6477
FKBP10	2.50551	4.95242	7.25873	2.59386e-10	5.94219e-09	12.6402
SGK2	-3.43916	5.53477	-7.15326	4.12318e-10	9.00311e-09	12.5992
BST2	2.17372	5.93539	7.24511	2.75401e-10	6.26509e-09	12.5991
RTN4	-0.9574	9.18183	-7.23945	2.82345e-10	6.40518e-09	12.5931
EFS	1.48709	2.85588	7.21546	3.13758e-10	7.04919e-09	12.5756
MCOLN3	-4.55179	2.801	-7.09143	5.40766e-10	1.14849e-08	12.5725
RAB17	-1.9955	6.34328	-7.22828	2.96559e-10	6.69969e-09	12.5714
YBX3P1	1.35331	0.699485	7.12489	4.66966e-10	1.01151e-08	12.5543
UNC13B	-1.10149	6.78952	-7.24131	2.80049e-10	6.36194e-09	12.5416
GLTSCR2	1.1805	7.59792	7.22323	3.03219e-10	6.84067e-09	12.5354
PNMA3	2.36869	1.71149	7.1868	3.55851e-10	7.897e-09	12.5267
DENND3	1.07669	4.88565	7.23689	2.85547e-10	6.46882e-09	12.5236
GRK5	1.5309	3.52467	7.21053	3.20619e-10	7.17368e-09	12.4717
MGC16275	0.945047	0.622181	7.09157	5.40413e-10	1.14849e-08	12.462
TMEM204	1.76649	4.92761	7.21435	3.15293e-10	7.07393e-09	12.4278
MPP6	-2.56872	2.87997	-7.05772	6.26808e-10	1.29909e-08	12.385
NARS2	-0.967448	4.74608	-7.16214	3.96555e-10	8.71726e-09	12.3729
LSM11	0.812299	3.22911	7.16163	3.97445e-10	8.72506e-09	12.364
FH	-1.32448	6.78931	-7.1984	3.38171e-10	7.5457e-09	12.3617
MYO6	-1.05545	7.94069	-7.19594	3.4185e-10	7.61737e-09	12.3553
AREL1	-1.044	6.26508	-7.19219	3.47526e-10	7.72275e-09	12.3472
PCDH12	1.74718	5.22868	7.19243	3.47169e-10	7.72275e-09	12.3372
CBR4	-1.3087	5.6502	-7.17076	3.81834e-10	8.42773e-09	12.3273
ARHGAP22	2.38411	-0.29137	7.06664	6.02796e-10	1.25809e-08	12.3181
PYGM	2.01204	1.53392	7.11659	4.84278e-10	1.04072e-08	12.3021
ACVRL1	1.34768	5.60765	7.18434	3.59726e-10	7.96255e-09	12.3006
INSIG2	1.17014	5.61553	7.1843	3.59782e-10	7.96255e-09	12.2964
P3H1	1.04013	4.33058	7.16866	3.8536e-10	8.4826e-09	12.2529
ANLN	2.44525	0.830837	7.0917	5.40128e-10	1.14849e-08	12.2468
TMEM19	-1.48294	5.97223	-7.1558	4.07751e-10	8.91531e-09	12.2441
UHRF1	3.08551	-1.1895	7.04035	6.76317e-10	1.38852e-08	12.2413
CYTOR	2.05302	2.04261	7.12449	4.67788e-10	1.01195e-08	12.2346
AFAP1	1.25977	5.46018	7.16936	3.84179e-10	8.46804e-09	12.2303
SORBS3	1.19533	6.62964	7.16069	3.99089e-10	8.74938e-09	12.2233
CLEC2D	0.857606	3.46763	7.13777	4.41313e-10	9.61048e-09	12.221
MMP9	3.62474	0.31207	7.1009	5.18777e-10	1.10611e-08	12.2169
SCO1	-0.946999	5.05569	-7.13404	4.48602e-10	9.7562e-09	12.202
PHLDA3	1.97107	4.21376	7.1572	4.05252e-10	8.87258e-09	12.1823
KIF4A	2.61411	-0.700327	7.02612	7.19783e-10	1.46755e-08	12.1707
C1QTNF2	2.5788	-0.0853278	7.0402	6.76767e-10	1.38852e-08	12.1597
DISC1	1.57559	2.38307	7.10494	5.09655e-10	1.09094e-08	12.1594
MCM7	0.986532	5.35597	7.13931	4.38352e-10	9.55877e-09	12.0944
PALD1	1.61813	3.24389	7.11722	4.82958e-10	1.03925e-08	12.0875
DNAJC17	0.653973	3.12359	7.08361	5.596e-10	1.18234e-08	12.0674
CACNA1C	1.87482	3.44856	7.12041	4.7624e-10	1.02751e-08	12.066
DBNDD1	1.36477	4.41738	7.12639	4.63912e-10	1.00623e-08	12.0518
SLC6A1	2.31702	0.629125	7.03395	6.95543e-10	1.42346e-08	12.0467
DBT	-1.40569	6.59563	-7.12208	4.72756e-10	1.02134e-08	12.0429
PLA2G4D	3.10993	-5.64182	6.9771	8.91821e-10	1.7783e-08	12.0331
ZNF394	0.601791	4.16918	7.10775	5.03431e-10	1.07904e-08	12.031
FAM127B	0.956042	5.36877	7.1181	4.81081e-10	1.03658e-08	12.002
ALDH5A1	-2.00034	6.17911	-7.08942	5.45545e-10	1.15714e-08	11.9886
SSPN	1.58587	4.72603	7.11396	4.89904e-10	1.05143e-08	11.9881
SPINK13	4.24638	-4.19628	6.95207	9.94867e-10	1.95509e-08	11.9835
PANX1	0.939907	4.23818	7.10301	5.14e-10	1.0988e-08	11.9793
RNF145	1.23473	6.16134	7.10204	5.16196e-10	1.10205e-08	11.9543
EPDR1	-1.4117	5.27762	-7.06579	6.05037e-10	1.25877e-08	11.9367
THEM4	-1.24116	4.78655	-7.05158	6.43879e-10	1.33109e-08	11.9283
FAM171A1	-2.44735	6.94857	-7.08182	5.64016e-10	1.19013e-08	11.916
ZNF628	1.26386	2.50482	7.04344	6.67251e-10	1.37592e-08	11.9111
ATP1B1	-1.75645	11.21	-7.06601	6.04472e-10	1.25877e-08	11.8991
DMD	1.31349	4.68108	7.08907	5.46369e-10	1.15738e-08	11.882
ESM1	4.05164	4.2955	7.07432	5.82853e-10	1.22828e-08	11.8688
NRIP2	1.63951	4.44057	7.0846	5.57188e-10	1.17877e-08	11.8647
NUDT9	-0.816627	5.54059	-7.06906	5.96448e-10	1.24887e-08	11.8495
CXCL5	3.28489	-1.78983	6.93697	1.06265e-09	2.06591e-08	11.8398
ANGPT2	3.16409	3.71806	7.07161	5.89809e-10	1.23989e-08	11.8287
NDN	1.2666	4.52405	7.07155	5.8997e-10	1.23989e-08	11.8121
PDK1	1.79464	4.35393	7.06976	5.9461e-10	1.24662e-08	11.8005
GIMAP5	1.257	4.99235	7.07129	5.90643e-10	1.23989e-08	11.8004
ATP5G3	-1.34315	8.2422	-7.06741	6.00773e-10	1.25631e-08	11.7984
CELF2	1.49469	4.24235	7.0665	6.03167e-10	1.25809e-08	11.7957
TRIB2	1.45934	6.5815	7.05928	6.22535e-10	1.29353e-08	11.7899
C12orf43	0.607609	3.80258	7.04114	6.73986e-10	1.3863e-08	11.7833
MID1	1.73432	5.35328	7.0587	6.2412e-10	1.29517e-08	11.7587
CNTROB	0.801344	4.57614	7.05265	6.40875e-10	1.32656e-08	11.7457
GNAI2	1.0492	7.94806	7.03809	6.83062e-10	1.39968e-08	11.7415
FIBCD1	4.02898	-3.6136	6.89541	1.27381e-09	2.42722e-08	11.7336
MIA2	-1.26946	6.5892	-7.05115	6.45103e-10	1.33193e-08	11.7282
EBF4	1.29881	3.25766	7.02577	7.20873e-10	1.46794e-08	11.7142
C3orf36	3.34042	-1.0393	6.91979	1.14534e-09	2.21346e-08	11.6935
MUT	-1.18316	6.6047	-7.0413	6.73531e-10	1.3863e-08	11.6811
VPS50	-0.757571	5.05741	-7.01773	7.467e-10	1.51485e-08	11.6737
FOXD2-AS1	1.61834	0.449951	6.91654	1.16169e-09	2.23863e-08	11.668
PRDX3	-1.15865	8.40207	-7.03361	6.96579e-10	1.4238e-08	11.6618
OTUD3	1.13381	3.79311	7.02343	7.28287e-10	1.48118e-08	11.6615
ZNF613	0.722473	2.96073	6.98015	8.8001e-10	1.7569e-08	11.6375
FGL2	-1.76963	7.65488	-7.03172	7.02356e-10	1.43381e-08	11.6281
EN1	3.78027	-5.06726	6.86753	1.43839e-09	2.69984e-08	11.6256
SLC2A14	2.44602	-0.507418	6.89311	1.28669e-09	2.44606e-08	11.5989
ITGB4	1.97199	5.4218	7.01928	7.41631e-10	1.50644e-08	11.596
MCAM	2.77952	6.79157	7	8.069e-10	1.62086e-08	11.5942
TRAPPC8	-0.664201	6.18999	-7.01741	7.47725e-10	1.51505e-08	11.5741
MSS51	1.17902	1.28457	6.91077	1.19131e-09	2.28068e-08	11.5703
NNT	-1.46896	7.89317	-7.01539	7.54373e-10	1.52662e-08	11.5605
MYO15A	1.96568	-1.14269	6.86056	1.48267e-09	2.77656e-08	11.5501
C1orf168	-6.04613	2.86055	-6.85348	1.52913e-09	2.84721e-08	11.5495
GMFG	1.66156	3.37253	6.99631	8.20022e-10	1.64317e-08	11.5493
ARHGEF17	1.12686	6.84333	7.00157	8.01353e-10	1.61369e-08	11.5384
RIT1	0.781846	5.47861	7.00988	7.72769e-10	1.56191e-08	11.5316
CAT	-1.68244	8.6637	-7.00487	7.89874e-10	1.59445e-08	11.5315
MATK	2.93813	-0.283554	6.89501	1.27603e-09	2.42863e-08	11.5279
JAK3	2.01128	2.44864	6.9737	9.05175e-10	1.80272e-08	11.5265
FAM35A	-1.16312	5.84569	-6.99317	8.31328e-10	1.66378e-08	11.5219
CNTNAP3	-3.0574	2.17544	-6.84075	1.61622e-09	2.9957e-08	11.5145
UQCRFS1	-1.34347	7.38826	-7.0046	7.90822e-10	1.59445e-08	11.5089
PAK1	-0.724793	5.97235	-6.99802	8.13901e-10	1.63291e-08	11.5038
CAB39	-0.665397	7.4213	-7.00107	8.03109e-10	1.61523e-08	11.5035
GABRG1	3.89208	-2.11426	6.85811	1.49859e-09	2.80315e-08	11.4935
CCDC88C	-1.79389	4.7789	-6.92495	1.11987e-09	2.16938e-08	11.4794
PFKP	2.76516	7.04674	6.96248	9.50653e-10	1.87953e-08	11.4424
PLPP1	1.30581	7.10243	6.97267	9.09245e-10	1.80642e-08	11.4308
NT5C2	-0.695252	6.42465	-6.98198	8.73014e-10	1.74507e-08	11.4141
TMEM47	1.25954	6.849	6.96979	9.20763e-10	1.82708e-08	11.4058
MMP11	2.39077	2.41325	6.95015	1.00321e-09	1.96675e-08	11.3983
ASRGL1	-2.64491	5.8926	-6.91639	1.16248e-09	2.23863e-08	11.3831
ATP6V0D1	-0.933096	7.09685	-6.97324	9.06989e-10	1.80413e-08	11.3727
RPL11	0.937853	8.91809	6.94276	1.03613e-09	2.02643e-08	11.3682
RPL7A	0.881313	9.12387	6.94001	1.04861e-09	2.04593e-08	11.3633
PTPRE	1.74901	3.67145	6.95732	9.72312e-10	1.92002e-08	11.3469
ZNRF3	-1.11059	5.99839	-6.95639	9.76275e-10	1.92319e-08	11.3461
PECAM1	1.63587	6.5421	6.95516	9.81533e-10	1.93122e-08	11.344
SLC30A9	-0.888845	7.28923	-6.96352	9.46317e-10	1.87323e-08	11.3334
SNX19	-0.898387	7.07444	-6.96399	9.4438e-10	1.87166e-08	11.3327
IMPDH2	0.808946	6.50364	6.95704	9.73499e-10	1.92004e-08	11.3242
DPP7	1.34402	6.264	6.95123	9.9851e-10	1.95989e-08	11.307
GRIN2D	1.91989	-1.18463	6.79798	1.94668e-09	3.56367e-08	11.2901
NACA	0.68436	8.95655	6.92415	1.12378e-09	2.17437e-08	11.2797
TRAF5	0.931818	3.58079	6.92512	1.11902e-09	2.16938e-08	11.2754
RNF113A	0.764247	3.35418	6.91218	1.184e-09	2.26936e-08	11.2741
CISD1	-1.1315	5.6636	-6.93078	1.09172e-09	2.11989e-08	11.2673
ANXA2	1.95215	8.29937	6.91428	1.17319e-09	2.25394e-08	11.2573
KDELC2	1.12644	5.91388	6.94291	1.03544e-09	2.02643e-08	11.255
BICDL1	-6.57981	6.73344	-6.79333	1.98637e-09	3.62007e-08	11.2539
ANP32B	0.709918	6.73415	6.93838	1.05612e-09	2.0581e-08	11.2479
ITPR2	-1.41727	7.06901	-6.94135	1.04252e-09	2.03648e-08	11.2402
TMED10	0.644888	8.55159	6.91689	1.15996e-09	2.23863e-08	11.2285
KANK1	-0.994259	6.8188	-6.9376	1.05973e-09	2.06269e-08	11.2203
GRAP	1.18224	3.47318	6.91257	1.182e-09	2.26819e-08	11.2121
RPL5	0.900538	9.50655	6.89912	1.2534e-09	2.39114e-08	11.2047
P2RY8	1.89134	3.25351	6.91584	1.16528e-09	2.24139e-08	11.1977
ITGA4	2.10011	3.6998	6.91041	1.19316e-09	2.28156e-08	11.1298
RPL36AL	0.864815	7.02847	6.90392	1.22742e-09	2.34432e-08	11.1143
DARS2	-1.15265	5.395	-6.87748	1.37735e-09	2.59721e-08	11.071
ANAPC13	-1.0717	6.65686	-6.88981	1.30532e-09	2.4786e-08	11.0197
PAM	0.938629	8.21464	6.86879	1.43051e-09	2.68813e-08	11.0176
PLEKHG6	1.49354	1.5284	6.80318	1.90318e-09	3.49133e-08	11.0166
SH3BGRL2	-1.30407	6.11316	-6.87885	1.36913e-09	2.58472e-08	11.016
GRAMD1A	1.0601	4.93821	6.88937	1.3078e-09	2.48041e-08	11.0151
PLCD1	0.929611	4.60584	6.8849	1.33351e-09	2.5233e-08	11.0124
FKBP1B	1.40579	2.52219	6.84083	1.61569e-09	2.9957e-08	11.0122
MICU2	-0.996332	6.41457	-6.88583	1.32816e-09	2.51609e-08	11.0091
MRTO4	0.643724	4.60596	6.879	1.36827e-09	2.58472e-08	11.0006
FAM35DP	-1.4852	2.44797	-6.73814	2.52426e-09	4.46564e-08	10.9832
ANK2	-2.5939	8.10027	-6.87467	1.39431e-09	2.62616e-08	10.9572
TRAPPC10	-0.904509	6.3607	-6.87075	1.41833e-09	2.66833e-08	10.9427
PGM2L1	1.70337	3.95606	6.86555	1.45084e-09	2.72007e-08	10.9334
GHITM	-1.13208	8.78812	-6.85674	1.50758e-09	2.81675e-08	10.9118
ANO5	-2.84871	4.18292	-6.72987	2.61643e-09	4.6087e-08	10.8979
SNX29	-1.55062	6.72251	-6.85602	1.51229e-09	2.8223e-08	10.8921
PFKFB2	-2.88474	6.21318	-6.80295	1.90503e-09	3.49133e-08	10.8759
CASP4	1.23971	4.69194	6.85478	1.52046e-09	2.83431e-08	10.8692
SH3PXD2B	1.55679	3.77748	6.84435	1.59109e-09	2.95584e-08	10.8609
RPL19	0.90463	9.37557	6.81856	1.78006e-09	3.28818e-08	10.8523
PIP4K2C	-0.938619	6.85979	-6.84597	1.57993e-09	2.93845e-08	10.8236
DNER	-6.07495	4.83595	-6.67503	3.31817e-09	5.69712e-08	10.8234
SLC38A7	-0.849581	3.72658	-6.75656	2.33035e-09	4.17238e-08	10.7917
FGD5	2.11565	5.98114	6.82733	1.71339e-09	3.1722e-08	10.7884
CPA3	4.00957	0.81563	6.78604	2.05033e-09	3.72002e-08	10.7612
GPSM3	1.65008	3.19669	6.80877	1.85746e-09	3.4153e-08	10.7571
ADCY8	4.25253	-2.26366	6.68649	3.1576e-09	5.46167e-08	10.7499
CDH5	1.62087	6.37555	6.81739	1.7891e-09	3.30113e-08	10.7429
RUFY3	-0.85423	5.1395	-6.79698	1.95513e-09	3.57512e-08	10.7229
ZNF416	0.80127	2.56556	6.75297	2.36697e-09	4.21947e-08	10.7219
SH2D3C	1.37662	4.63557	6.82004	1.7686e-09	3.27071e-08	10.7191
COL5A2	2.29091	4.80365	6.81563	1.80289e-09	3.32283e-08	10.7111
RP9P	0.953363	2.55058	6.75296	2.36707e-09	4.21947e-08	10.7032
LYPLAL1	-1.57946	5.71486	-6.78904	2.02376e-09	3.67589e-08	10.7002
KLHDC7A	-2.14209	6.57599	-6.79624	1.9614e-09	3.57857e-08	10.6926
B3GALNT1	-0.926253	5.52399	-6.79634	1.96057e-09	3.57857e-08	10.683
SDK1	1.49287	4.24518	6.80899	1.85567e-09	3.4153e-08	10.6827
TLN2	-1.98621	7.50726	-6.80854	1.85935e-09	3.4153e-08	10.6716
IFNAR2	1.34489	4.06386	6.79302	1.9891e-09	3.621e-08	10.6298
CAV2	1.65796	5.60094	6.7927	1.9918e-09	3.62188e-08	10.6136
ZNF256	0.771639	2.2591	6.70915	2.86235e-09	5.00406e-08	10.5987
RPL35A	1.10741	8.12508	6.77045	2.194e-09	3.95429e-08	10.5974
ZNF85	0.866482	2.27333	6.71292	2.81589e-09	4.93339e-08	10.5942
PDLIM1	2.0071	6.1177	6.77991	2.10561e-09	3.81183e-08	10.5858
STK33	-2.784	3.4059	-6.63736	3.90531e-09	6.60784e-08	10.5795
AK3	-1.16112	7.6298	-6.78151	2.09107e-09	3.78972e-08	10.5508
PLCD3	1.32766	4.59239	6.77786	2.12447e-09	3.8417e-08	10.5395
ACLY	1.38422	7.60994	6.75656	2.33033e-09	4.17238e-08	10.5258
RCBTB2	0.990035	5.57747	6.77465	2.1543e-09	3.89133e-08	10.5196
MCCC1	-1.69011	6.12885	-6.75573	2.33877e-09	4.18286e-08	10.5195
RUNX1	2.79073	4.08527	6.76931	2.20487e-09	3.9695e-08	10.5154
VAMP7	-0.619155	6.32624	-6.77281	2.17156e-09	3.91817e-08	10.5127
APEH	-1.0555	7.33521	-6.76761	2.22117e-09	3.99444e-08	10.4875
MEF2C	1.6321	5.45301	6.7608	2.28789e-09	4.10988e-08	10.4719
ABCB8	-1.1281	5.02214	-6.72523	2.66955e-09	4.69719e-08	10.4684
MDK	2.1087	4.09115	6.75988	2.29704e-09	4.12179e-08	10.4664
MED10	0.722487	4.01736	6.73919	2.51278e-09	4.45016e-08	10.4457
RASGRP3	1.22486	4.63331	6.75368	2.35964e-09	4.21557e-08	10.4368
MAP1S	1.121	4.73835	6.75271	2.36959e-09	4.21947e-08	10.4312
FAM45A	-0.835037	4.94775	-6.72187	2.70873e-09	4.75587e-08	10.4231
HADHB	-1.05282	8.28814	-6.74333	2.46805e-09	4.38523e-08	10.4087
METTL7A	-1.50666	8.29824	-6.74369	2.46416e-09	4.38308e-08	10.399
PABPC4L	1.39913	2.23343	6.68527	3.1742e-09	5.48457e-08	10.3988
WASF2	0.693353	7.64521	6.73291	2.58213e-09	4.56306e-08	10.3979
NRGN	1.54088	3.3031	6.72367	2.68774e-09	4.72411e-08	10.3924
TAF1D	1.12501	3.98282	6.7319	2.59354e-09	4.57826e-08	10.3886
SPX	-2.79371	2.51584	-6.57673	5.07409e-09	8.41092e-08	10.3848
AQP2	-10.6769	10.7103	-6.58909	4.8106e-09	8.00671e-08	10.383
PAQR4	1.83239	1.86083	6.67818	3.27318e-09	5.63173e-08	10.3816
KLHL23	1.45732	2.62614	6.69463	3.04816e-09	5.28921e-08	10.3725
KXD1	0.623649	5.39609	6.74065	2.49691e-09	4.43167e-08	10.3719
USP45	-1.04346	3.60053	-6.64485	3.78089e-09	6.43066e-08	10.3685
GAB3	1.47016	1.62957	6.65139	3.67555e-09	6.25803e-08	10.3641
ATP6V1D	-0.785836	6.8235	-6.73931	2.51149e-09	4.45016e-08	10.364
PTPRK	1.06607	6.45112	6.7302	2.61266e-09	4.60704e-08	10.3529
SGCA	2.41981	0.212079	6.61998	4.21001e-09	7.08664e-08	10.3394
PRR3	0.732138	3.05001	6.68014	3.24561e-09	5.5961e-08	10.331
ACD	0.740765	3.60968	6.6967	3.02094e-09	5.25314e-08	10.3133
SYN1	1.63496	0.000416053	6.57758	5.05555e-09	8.38872e-08	10.2772
IKBIP	1.44535	4.22219	6.71238	2.82254e-09	4.93974e-08	10.2707
SNRPA	0.811278	4.97231	6.71432	2.79894e-09	4.90898e-08	10.2661
FAIM	0.990652	3.81803	6.69723	3.01397e-09	5.24663e-08	10.2616
ANKRD7	-2.56402	-1.13128	-6.54225	5.88741e-09	9.63184e-08	10.2388
EFNA5	1.42374	4.88092	6.70765	2.88095e-09	5.03117e-08	10.2328
B4GALT6	-2.00086	3.53387	-6.57321	5.15182e-09	8.51382e-08	10.2142
FOXC2	1.51607	1.39156	6.60785	4.43639e-09	7.437e-08	10.2124
U2AF1	0.727655	5.7202	6.70291	2.94071e-09	5.13004e-08	10.2097
GSR	-0.838852	6.60606	-6.69832	2.99984e-09	5.22761e-08	10.1915
PNPLA8	-0.788375	6.109	-6.69202	3.08278e-09	5.34359e-08	10.1814
ELP2	0.537691	5.74652	6.69579	3.03285e-09	5.26824e-08	10.1777
RPS6KA2	0.920668	6.43941	6.69027	3.10628e-09	5.3786e-08	10.1772
PGGHG	1.82941	3.21889	6.67724	3.28652e-09	5.64872e-08	10.1758
RPS25	0.922909	8.33359	6.67046	3.3845e-09	5.79272e-08	10.1711
SMTNL2	-4.00335	5.03053	-6.54763	5.75249e-09	9.42056e-08	10.1529
CENPH	1.61008	0.768434	6.57059	5.2104e-09	8.6019e-08	10.1408
PA2G4	0.436726	6.8578	6.67862	3.26702e-09	5.62707e-08	10.1268
NT5DC2	1.38501	4.66589	6.68119	3.2309e-09	5.57663e-08	10.1221
FBXL17	-0.731928	5.91037	-6.6736	3.33881e-09	5.72654e-08	10.1112
TAF11	0.621431	4.43766	6.66735	3.43032e-09	5.85885e-08	10.1058
CMC2	-1.22001	4.43264	-6.61114	4.3738e-09	7.34717e-08	10.1003
GABARAPL1	-1.23206	8.52043	-6.67062	3.38215e-09	5.79272e-08	10.1
RPL32	1.07852	8.86484	6.64298	3.8117e-09	6.47632e-08	10.084
TEX2	0.900849	6.4277	6.66745	3.42888e-09	5.85885e-08	10.0787
NOA1	0.527921	4.65693	6.65984	3.54355e-09	6.03958e-08	10.0626
PFN2	-0.900108	7.56623	-6.66225	3.50689e-09	5.98336e-08	10.0433
ETS1	1.59847	7.37369	6.63484	3.94818e-09	6.67344e-08	10.0026
BTNL9	1.86509	3.64138	6.64199	3.82793e-09	6.49713e-08	9.98862
CORO2B	-1.85951	4.35459	-6.55421	5.59171e-09	9.1757e-08	9.9877
SFRP1	-3.82086	8.64147	-6.63871	3.88261e-09	6.57624e-08	9.97875
POU5F1B	1.51111	0.106092	6.506	6.88163e-09	1.10918e-07	9.97705
UBA2	0.63073	6.45835	6.64139	3.83796e-09	6.50737e-08	9.9608
NAP1L1	1.01468	8.08667	6.62177	4.17766e-09	7.04672e-08	9.95537
ANXA9	-2.83924	4.80649	-6.5243	6.36057e-09	1.03334e-07	9.93289
SCNM1	0.660608	3.784	6.60927	4.40941e-09	7.39937e-08	9.9246
LHFPL3-AS2	-3.91422	3.24047	-6.45775	8.46748e-09	1.33057e-07	9.90649
DOCK9	1.37124	6.4209	6.62046	4.20129e-09	7.07927e-08	9.89181
NDUFA4	-1.2205	7.87805	-6.62207	4.17216e-09	7.04474e-08	9.8728
THBS3	0.989517	3.83929	6.60345	4.52164e-09	7.56436e-08	9.86143
MST1R	1.84762	0.926475	6.51775	6.54244e-09	1.05972e-07	9.85596
LRP2BP	0.848583	1.72981	6.51196	6.70734e-09	1.08428e-07	9.8451
APEX1	0.589118	6.73089	6.61182	4.36114e-09	7.33346e-08	9.84154
SIGLEC8	3.88297	-3.0769	6.44696	8.86883e-09	1.38696e-07	9.83762
IL15	-1.27225	2.06486	-6.46028	8.37599e-09	1.32001e-07	9.83241
ARMC3	-4.92994	-0.676509	-6.47026	8.02459e-09	1.27077e-07	9.83097
HNRNPUL1	0.605175	7.72149	6.59749	4.63941e-09	7.74548e-08	9.81873
LGALS9	1.87235	3.80544	6.60497	4.49201e-09	7.52251e-08	9.81843
ALKBH2	0.706313	3.1371	6.55453	5.58399e-09	9.17225e-08	9.7866
CDH13	2.27774	4.91154	6.59815	4.6263e-09	7.73152e-08	9.78162
PLK2	1.74368	4.77237	6.59715	4.64613e-09	7.74877e-08	9.76301
BMP1	1.57137	4.00968	6.59172	4.75649e-09	7.92474e-08	9.76243
SCYL2	-0.869982	5.91837	-6.58736	4.8468e-09	8.05874e-08	9.75082
TMOD2	0.952442	4.70322	6.58442	4.90872e-09	8.15337e-08	9.71737
ZCCHC7	0.61419	3.92227	6.56254	5.39443e-09	8.88774e-08	9.71125
DZIP1	-1.24898	5.88866	-6.56825	5.26324e-09	8.68036e-08	9.70127
POPDC2	1.39489	1.53372	6.48955	7.38594e-09	1.18226e-07	9.69855
RPL3	0.824485	10.5915	6.53364	6.10965e-09	9.96545e-08	9.68605
RGCC	2.31093	4.92351	6.57402	5.13375e-09	8.50117e-08	9.67954
KRT19	3.78066	7.33663	6.5387	5.97809e-09	9.7704e-08	9.67867
TNFRSF21	-1.53856	6.92908	-6.57343	5.14695e-09	8.51382e-08	9.66965
ANXA2P2	1.82544	6.80217	6.55747	5.51359e-09	9.07489e-08	9.65597
CALHM2	1.3057	3.57736	6.55084	5.67345e-09	9.30047e-08	9.63787
PARP3	-0.940364	4.89857	-6.52757	6.27164e-09	1.02093e-07	9.61829
STARD7	-0.689721	7.92913	-6.55654	5.53574e-09	9.10216e-08	9.60852
TPI1	1.11518	9.05709	6.52886	6.23675e-09	1.01626e-07	9.60786
RPL30	1.0071	8.35959	6.53386	6.10392e-09	9.96545e-08	9.59329
TOX2	1.84474	1.50788	6.47206	7.96246e-09	1.26338e-07	9.57106
C4orf46	0.820414	2.6847	6.48621	7.49278e-09	1.19584e-07	9.55878
LHFPL3	-2.7653	0.247176	-6.36402	1.26531e-08	1.90042e-07	9.55167
ZNF296	1.36097	-0.910643	6.37825	1.19057e-08	1.8031e-07	9.54719
GINS2	1.79658	0.653836	6.42428	9.77498e-09	1.51415e-07	9.51713
SLC35G2	1.16817	2.17442	6.46157	8.32969e-09	1.31398e-07	9.49432
COQ10B	-0.690008	5.48294	-6.52019	6.47387e-09	1.04965e-07	9.48602
GOLGA2P10	1.15432	3.33132	6.50497	6.91221e-09	1.11188e-07	9.48567
ATG9B	2.05291	-2.08237	6.35254	1.32899e-08	1.97964e-07	9.47308
CMTM3	1.74657	4.14557	6.52614	6.31018e-09	1.02617e-07	9.47062
FAM111B	2.4977	-0.555283	6.3891	1.13653e-08	1.72768e-07	9.46397
SYDE2	-1.59337	3.16938	-6.39391	1.11337e-08	1.6964e-07	9.46156
PLVAP	2.07999	7.84963	6.49817	7.11723e-09	1.14261e-07	9.46141
NAPEPLD	-1.49158	6.00169	-6.50593	6.88375e-09	1.10918e-07	9.44612
FAM199X	-0.930517	5.49942	-6.50576	6.88863e-09	1.10918e-07	9.44364
TSR1	0.537316	5.61689	6.52362	6.37911e-09	1.03532e-07	9.44272
RFX8	2.90153	-4.32113	6.33585	1.42721e-08	2.10292e-07	9.4393
ETFDH	-1.41249	5.79925	-6.49893	7.09406e-09	1.14001e-07	9.43119
CA2	-1.84604	8.32258	-6.51626	6.58436e-09	1.06545e-07	9.42025
SAMD14	1.64063	0.645346	6.38883	1.13786e-08	1.72809e-07	9.39878
AATF	0.641849	5.60842	6.509	6.79338e-09	1.0971e-07	9.38073
AACSP1	-3.80013	-1.52226	-6.35082	1.33879e-08	1.9888e-07	9.37083
PIAS2	0.661121	4.28653	6.48697	7.46829e-09	1.1931e-07	9.34786
EMX1	-5.61214	5.01969	-6.32438	1.49887e-08	2.18873e-07	9.33938
FAM124A	-2.06438	2.62863	-6.33478	1.43377e-08	2.10877e-07	9.32459
MMP15	0.970497	5.58758	6.49287	7.28132e-09	1.1678e-07	9.31547
PCDHB12	1.22198	1.27072	6.38042	1.17955e-08	1.78807e-07	9.31468
FAM46A	1.74697	4.64529	6.48976	7.37946e-09	1.18226e-07	9.30552
CAMLG	0.85537	5.21246	6.48714	7.46307e-09	1.1931e-07	9.29017
CEACAM21	2.61072	-1.32804	6.32606	1.48816e-08	2.17504e-07	9.27856
FAM198B	1.82433	5.83987	6.47588	7.83304e-09	1.24648e-07	9.27148
CD248	2.3513	4.50472	6.47776	7.76986e-09	1.23764e-07	9.26298
HNRNPA1	0.702667	7.97273	6.46256	8.29416e-09	1.30964e-07	9.26032
COL4A1	2.4505	8.58411	6.43906	9.17477e-09	1.42795e-07	9.25887
IGBP1	0.794695	6.37445	6.47518	7.85652e-09	1.249e-07	9.25491
CSNK1E	0.919596	5.63434	6.47825	7.75373e-09	1.23628e-07	9.25314
DUSP12	0.614588	3.03996	6.42174	9.88188e-09	1.52925e-07	9.25244
UQCC1	-0.75833	5.66406	-6.46546	8.19174e-09	1.29472e-07	9.24403
ZNF608	1.17318	4.42989	6.47171	7.97465e-09	1.26409e-07	9.24343
TNNI2	2.95299	-3.88934	6.2868	1.7595e-08	2.51968e-07	9.23648
CPA6	3.39877	-3.75914	6.28951	1.73928e-08	2.50171e-07	9.23447
EPHA7	-5.93092	4.49618	-6.28847	1.74705e-08	2.50716e-07	9.2323
WWC3	0.99167	5.65126	6.47233	7.95344e-09	1.26318e-07	9.22969
RPL13P5	-1.05509	0.330874	-6.2885	1.74678e-08	2.50716e-07	9.22221
ACAD8	-1.46244	5.68092	-6.44412	8.97739e-09	1.40164e-07	9.2195
SCD5	1.75279	7.19474	6.45113	8.71161e-09	1.3663e-07	9.21924
CYCS	-1.30333	7.77037	-6.46628	8.16269e-09	1.29138e-07	9.20514
SELENBP1	-2.17019	6.73519	-6.44891	8.79479e-09	1.3767e-07	9.19535
FMNL3	1.18165	5.56543	6.45932	8.41048e-09	1.32289e-07	9.17686
DYNLL2	-0.874153	7.10564	-6.45999	8.38625e-09	1.32035e-07	9.17316
HEATR5A	-0.937162	5.38069	-6.43684	9.26255e-09	1.44024e-07	9.16548
ZNF649	0.714954	4.08286	6.44007	9.1348e-09	1.42309e-07	9.16344
ARG2	-3.7135	6.91501	-6.39573	1.10472e-08	1.69035e-07	9.15707
ABCD3	-0.970831	7.19081	-6.45234	8.66615e-09	1.36048e-07	9.14089
RBM22	0.421346	5.65359	6.4507	8.72749e-09	1.36747e-07	9.13342
RAB15	-1.75264	4.6039	-6.36934	1.23682e-08	1.86622e-07	9.13036
FAM98A	-0.682455	5.81485	-6.44222	9.05085e-09	1.41136e-07	9.12914
B3GNT4	3.06727	0.351272	6.35804	1.29806e-08	1.94244e-07	9.1281
MDH1	-1.12303	7.90836	-6.44406	8.97991e-09	1.40164e-07	9.11874
C17orf53	1.42104	-0.51656	6.28017	1.80991e-08	2.5783e-07	9.1051
FBL	0.966368	6.12427	6.43434	9.36224e-09	1.45436e-07	9.07928
RANGAP1	-0.835627	6.20771	-6.43321	9.40759e-09	1.46001e-07	9.07624
WDR77	-0.553791	4.92102	-6.41242	1.02848e-08	1.5826e-07	9.07608
SYT10	-6.46398	0.531647	-6.2816	1.79895e-08	2.56941e-07	9.07305
PARD6B	-1.40354	6.05303	-6.4191	9.99463e-09	1.54377e-07	9.06443
RPS19	1.30831	8.12338	6.4069	1.05311e-08	1.61872e-07	9.05637
AEN	1.21229	3.98126	6.4197	9.96892e-09	1.54126e-07	9.05131
AGAP2	2.2841	-0.173749	6.29483	1.70027e-08	2.45425e-07	9.04744
SLFN11	1.39007	4.52982	6.42775	9.63043e-09	1.49317e-07	9.04667
NECTIN4	2.00351	2.88416	6.40459	1.06357e-08	1.63198e-07	9.03692
FAM104A	0.605969	4.60486	6.416	1.01284e-08	1.56296e-07	9.02416
CHL1	-2.7641	6.09999	-6.36543	1.25771e-08	1.8922e-07	9.02235
C2orf27A	1.9083	-1.17314	6.25436	2.02023e-08	2.85051e-07	9.02004
COMMD8	-1.49148	4.97256	-6.36643	1.25234e-08	1.88615e-07	9.00856
CHSY1	1.5539	5.85023	6.41424	1.02047e-08	1.57176e-07	9.00276
NDUFA9	-0.981552	6.65431	-6.41564	1.01438e-08	1.56385e-07	8.98982
COL4A2	2.08419	8.75236	6.37551	1.2046e-08	1.82266e-07	8.98341
MTUS2	2.71978	-1.69814	6.24607	2.09276e-08	2.93761e-07	8.97147
AP1G1	-0.647944	7.60845	-6.40671	1.05394e-08	1.61872e-07	8.96366
SERPINH1	1.63894	6.59322	6.39804	1.09384e-08	1.67685e-07	8.96312
LINC01011	0.865698	1.18607	6.27972	1.81345e-08	2.58108e-07	8.96047
KCNJ16	-0.924577	9.10509	-6.3946	1.11008e-08	1.6964e-07	8.9596
OBSL1	1.49823	6.94786	6.39419	1.11201e-08	1.6964e-07	8.95669
ADM	3.17219	4.94656	6.39624	1.10233e-08	1.68827e-07	8.9508
CITED4	2.03052	3.38908	6.39421	1.11194e-08	1.6964e-07	8.94735
C11orf52	-1.49161	4.99082	-6.34882	1.35024e-08	2.00174e-07	8.931
AATK	1.64926	0.951522	6.28838	1.74768e-08	2.50716e-07	8.92891
TPM1	1.78966	8.13886	6.36997	1.23348e-08	1.8629e-07	8.92022
TCF4	1.59002	5.93085	6.3938	1.11387e-08	1.6964e-07	8.91971
RASSF2	1.93066	3.6386	6.38728	1.14544e-08	1.73798e-07	8.90237
LIG4	-1.17905	4.66981	-6.33814	1.41334e-08	2.08435e-07	8.89199
EVA1C	1.46581	3.42013	6.37339	1.2156e-08	1.8376e-07	8.88809
TM2D3	0.614262	5.29358	6.39135	1.12565e-08	1.71273e-07	8.88587
NMNAT3	-1.4787	3.58951	-6.27505	1.84984e-08	2.63057e-07	8.88373
ANXA4	1.18407	7.89072	6.36156	1.27871e-08	1.91876e-07	8.84907
HAPLN3	2.13242	0.814867	6.28073	1.80562e-08	2.57443e-07	8.8426
SLC25A35	-1.91402	3.18131	-6.23278	2.21449e-08	3.07933e-07	8.82663
PLCL1	-2.62194	6.88623	-6.35355	1.32323e-08	1.97287e-07	8.82082
LETM1	-1.2616	6.17116	-6.36525	1.25868e-08	1.8922e-07	8.81624
PRAF2	0.838241	4.58581	6.36809	1.24344e-08	1.87448e-07	8.81051
FOXF2	2.8232	-2.38523	6.19185	2.63508e-08	3.60274e-07	8.79333
CLIC3	2.51743	-1.43257	6.20399	2.50273e-08	3.45072e-07	8.792
RPL17	0.966755	7.75319	6.35096	1.33798e-08	1.9888e-07	8.78919
THSD1	1.24421	2.23413	6.2927	1.7158e-08	2.47229e-07	8.76344
ALDH9A1	-1.1617	7.70802	-6.3597	1.28887e-08	1.93223e-07	8.75564
RPL18	1.13745	8.33501	6.33413	1.43775e-08	2.11271e-07	8.75213
UBE2I	0.559608	5.76436	6.35836	1.29632e-08	1.94162e-07	8.74266
PRDX4	1.24856	5.38874	6.35692	1.3043e-08	1.95e-07	8.74182
SH3PXD2A	1.63051	5.37453	6.35368	1.32249e-08	1.97287e-07	8.73658
ISOC1	-1.10512	5.51705	-6.33314	1.4438e-08	2.1197e-07	8.73028
TNFSF12	0.74557	5.25178	6.35467	1.31691e-08	1.96705e-07	8.72986
HSPH1	-0.997368	6.51801	-6.35098	1.33787e-08	1.9888e-07	8.72156
CCDC184	1.53431	0.468858	6.21639	2.37426e-08	3.29587e-07	8.7183
RPA1	0.650016	6.39426	6.34903	1.34904e-08	2.00174e-07	8.7179
MORN2	-1.1348	4.63073	-6.29538	1.69629e-08	2.45286e-07	8.71416
ADPRHL2	0.764255	4.93002	6.34866	1.35118e-08	2.00174e-07	8.71398
ACADM	-1.95657	7.73574	-6.3472	1.35965e-08	2.01246e-07	8.69924
HSPA9	-0.869575	8.81004	-6.33478	1.43374e-08	2.10877e-07	8.69636
TTL	-0.73323	5.28289	-6.32725	1.4806e-08	2.16593e-07	8.69219
HSPA4	-0.641921	7.12644	-6.34293	1.3847e-08	2.04767e-07	8.68126
SEPHS1	-0.725527	6.16615	-6.33908	1.40765e-08	2.07784e-07	8.67565
MCCC2	-1.2521	7.354	-6.34212	1.38951e-08	2.05293e-07	8.67476
PEBP1	-1.51633	10.1692	-6.31932	1.53162e-08	2.23255e-07	8.66766
CCDC91	-0.754665	4.80144	-6.30523	1.62651e-08	2.36001e-07	8.6647
NDRG1	1.83096	10.044	6.28808	1.74996e-08	2.50822e-07	8.66464
SLC12A1	-8.22701	10.5316	-6.24156	2.1333e-08	2.98064e-07	8.6621
MCUB	1.60432	1.44604	6.24454	2.10645e-08	2.95174e-07	8.65632
MSX1	1.37532	0.864713	6.21138	2.42538e-08	3.35257e-07	8.65141
TGFB2	1.78969	3.9547	6.33107	1.45663e-08	2.13661e-07	8.65102
SF3A2	1.03167	4.81557	6.33075	1.45863e-08	2.13762e-07	8.63535
C2CD4C	2.14211	-0.31071	6.18594	2.70202e-08	3.68192e-07	8.62938
RILPL2	0.703157	5.0458	6.328	1.47585e-08	2.16092e-07	8.62399
TRIOBP	0.933855	6.36348	6.32085	1.52162e-08	2.21996e-07	8.606
DLK2	3.02298	-3.99675	6.12919	3.4365e-08	4.54973e-07	8.59644
EIF3E	0.842357	7.76779	6.30515	1.62709e-08	2.36001e-07	8.59188
OVCH2	-5.00107	2.14358	-6.12207	3.54152e-08	4.66606e-07	8.57401
NPM2	-1.92799	1.55811	-6.13462	3.35838e-08	4.45979e-07	8.56826
SIPA1L2	1.67709	4.73203	6.3147	1.56209e-08	2.27493e-07	8.56453
LDB2	1.25334	5.5078	6.314	1.56679e-08	2.27975e-07	8.56306
PMEPA1	2.99456	5.58174	6.30007	1.66272e-08	2.40644e-07	8.56141
CHRNB1	0.994974	3.72981	6.29314	1.71257e-08	2.46983e-07	8.55562
PTPN3	-1.20938	7.12597	-6.3109	1.58763e-08	2.30801e-07	8.5436
SPRY4	1.59824	5.82377	6.30272	1.64404e-08	2.38153e-07	8.53264
PDHA1	-1.15178	7.5957	-6.30505	1.62774e-08	2.36001e-07	8.52268
DCLK3	2.69833	-3.2602	6.11335	3.67455e-08	4.82185e-07	8.51987
CIT	-2.2561	5.67729	-6.24766	2.07871e-08	2.92292e-07	8.51422
RAPGEF4	1.80012	3.69761	6.29225	1.71914e-08	2.47492e-07	8.50659
ATP5A1	-1.21001	10.1016	-6.27468	1.85277e-08	2.63245e-07	8.48927
LZTS3	-2.15546	6.19759	-6.26534	1.92795e-08	2.72976e-07	8.48264
STRAP	-0.508242	7.02887	-6.29504	1.6988e-08	2.45425e-07	8.47993
HAPLN2	2.3543	-2.67982	6.10573	3.79495e-08	4.96387e-07	8.47762
AQP1	-1.95408	10.5363	-6.27197	1.87427e-08	2.66068e-07	8.46845
CHRNA5	2.20007	-1.30695	6.12344	3.52107e-08	4.64286e-07	8.46755
NAT14	1.8326	3.97261	6.28364	1.78336e-08	2.55162e-07	8.44922
ACTR3C	-2.21235	2.46055	-6.11523	3.64553e-08	4.78761e-07	8.44155
C3orf33	-0.920375	3.22238	-6.17401	2.8422e-08	3.85042e-07	8.43887
MCM5	1.07965	4.70383	6.28297	1.78846e-08	2.55667e-07	8.43653
PPID	-0.689657	5.16959	-6.2624	1.95229e-08	2.76182e-07	8.42902
TMEM100	1.99243	1.25615	6.19706	2.57743e-08	3.53877e-07	8.42796
CRTC3	0.67798	5.9287	6.28108	1.80296e-08	2.57289e-07	8.42084
ADCK1	-1.46829	3.21543	-6.14727	3.18323e-08	4.26636e-07	8.41105
NARS	-0.739764	7.9927	-6.26913	1.89709e-08	2.68839e-07	8.39342
PPIF	-1.14118	6.62723	-6.27158	1.87742e-08	2.66284e-07	8.38847
TMEM92	3.50475	-1.21425	6.13578	3.34194e-08	4.4462e-07	8.37699
STAC	1.88424	2.33314	6.22007	2.33742e-08	3.2475e-07	8.36101
PARP8	0.955175	3.86897	6.24722	2.08255e-08	2.92579e-07	8.35225
HES4	2.06138	0.289154	6.1371	3.3233e-08	4.42933e-07	8.3429
RASGRP2	1.44857	2.26125	6.19802	2.56699e-08	3.52739e-07	8.335
NME5	-1.19649	3.69002	-6.15778	3.04473e-08	4.09757e-07	8.33358
SDHD	-1.09116	7.77624	-6.25766	1.99203e-08	2.8156e-07	8.3294
PRMT2	0.720587	6.52716	6.25518	2.01323e-08	2.8431e-07	8.32881
RCBTB1	-1.02903	5.38231	-6.23553	2.18873e-08	3.04611e-07	8.32756
HECW2	2.72957	3.53495	6.25045	2.05418e-08	2.89591e-07	8.31482
RACK1	0.943901	9.67308	6.21552	2.38313e-08	3.30256e-07	8.30765
PXDN	2.6014	5.46553	6.24117	2.13689e-08	2.9816e-07	8.2953
SCP2	-0.827846	8.06267	-6.24504	2.10194e-08	2.94796e-07	8.29224
TMED5	-1.09178	7.43939	-6.25011	2.05714e-08	2.89758e-07	8.28972
RAB29	-2.55586	6.47225	-6.21515	2.38683e-08	3.30489e-07	8.28573
SEC23B	-0.755793	6.82088	-6.24842	2.07199e-08	2.91598e-07	8.27944
MAPK8IP3	1.61481	4.07712	6.24144	2.13438e-08	2.98064e-07	8.27499
TMEM184B	1.02869	6.21205	6.24233	2.12638e-08	2.97711e-07	8.27411
CHN1	1.14438	2.7057	6.19285	2.62393e-08	3.59052e-07	8.27012
FAP	3.34134	0.40658	6.16881	2.90559e-08	3.92326e-07	8.2652
UBE2D4	-0.937303	4.22467	-6.17742	2.80147e-08	3.80446e-07	8.26442
ENTPD1	1.02594	5.96916	6.24158	2.13312e-08	2.98064e-07	8.26404
TIMMDC1	-0.68795	6.06994	-6.24047	2.14329e-08	2.98797e-07	8.26385
HEY1	1.61342	2.94233	6.21281	2.41067e-08	3.33506e-07	8.25733
SLC12A5	3.00952	-4.1257	6.04411	4.92181e-08	6.23773e-07	8.25672
PCGF3	0.650145	4.96709	6.2376	2.16959e-08	3.02204e-07	8.24883
FGF13	1.61969	3.17367	6.21577	2.38054e-08	3.30179e-07	8.24777
EXOSC5	0.823687	3.24066	6.19437	2.60702e-08	3.57337e-07	8.23294
RPL27A	1.04541	8.47186	6.20938	2.4461e-08	3.3755e-07	8.23097
WASF3	-1.28358	4.7894	-6.18173	2.75063e-08	3.74191e-07	8.2305
ZNF662	1.08933	2.54229	6.17044	2.88557e-08	3.89946e-07	8.21266
PLAG1	-2.8291	2.50361	-6.04884	4.82474e-08	6.13856e-07	8.20985
WDR17	-3.31322	2.9769	-6.04893	4.82302e-08	6.13856e-07	8.20842
PRSS53	1.70656	-0.714178	6.04992	4.80278e-08	6.12017e-07	8.15626
SLC35F1	1.66373	1.04282	6.10707	3.77351e-08	4.93978e-07	8.15058
H2AFY2	-1.52248	4.50529	-6.1386	3.30231e-08	4.41146e-07	8.14782
TAT	-3.27936	-3.66846	-6.06913	4.42917e-08	5.67957e-07	8.13226
PBLD	-4.04717	7.14244	-6.14763	3.17839e-08	4.26338e-07	8.13041
VLDLR	1.34888	5.55831	6.20978	2.44193e-08	3.37259e-07	8.12915
CCDC59	0.594728	3.98817	6.18752	2.68389e-08	3.66335e-07	8.1231
CPT2	-1.35405	6.15419	-6.19555	2.59397e-08	3.55847e-07	8.11172
NSUN7	-1.40974	3.43733	-6.08394	4.16084e-08	5.36533e-07	8.10532
ELMO2	-0.581942	5.82867	-6.19971	2.54861e-08	3.5051e-07	8.10115
ARL6IP6	0.877833	3.47373	6.17359	2.84728e-08	3.85411e-07	8.10096
CHPF	1.80076	6.32182	6.19299	2.62238e-08	3.59052e-07	8.09605
PLPP6	-0.756127	3.87108	-6.1284	3.448e-08	4.56126e-07	8.09344
PHKB	-0.622147	7.23748	-6.20069	2.53806e-08	3.49648e-07	8.08664
SERPINA5	-2.67817	8.27931	-6.20017	2.5436e-08	3.50115e-07	8.08583
TNFSF11	2.69722	-3.07995	6.00623	5.77266e-08	7.20964e-07	8.07962
QPRT	-4.28551	6.30718	-6.08518	4.13913e-08	5.34971e-07	8.07331
GEMIN4	0.74251	4.44936	6.1887	2.67059e-08	3.64823e-07	8.07086
CCDC85A	1.28593	2.19924	6.12714	3.4664e-08	4.58189e-07	8.07076
RPS4X	1.06019	9.76539	6.15606	3.06689e-08	4.12399e-07	8.06821
TBCC	0.650897	4.06768	6.17724	2.80361e-08	3.80446e-07	8.06539
TMEM251	-0.946386	4.40806	-6.13695	3.3254e-08	4.42933e-07	8.05919
PAFAH2	-0.967536	5.81468	-6.18287	2.73743e-08	3.72707e-07	8.05685
SCGB3A1	2.43993	-2.83513	6.00002	5.92542e-08	7.36098e-07	8.05215
HOXA9	-1.62116	4.73636	-6.1189	3.58941e-08	4.72152e-07	8.04505
PLCL2	-1.49978	5.27246	-6.14808	3.17242e-08	4.25888e-07	8.04348
ETV6	1.06196	4.94443	6.18673	2.69299e-08	3.67268e-07	8.02632
GPC3	-4.06647	6.32904	-6.08198	4.19545e-08	5.40537e-07	8.02572
ZNF697	-1.88887	4.79319	-6.10347	3.83137e-08	4.99947e-07	8.01534
ARHGAP1	0.821555	7.10883	6.17279	2.857e-08	3.86406e-07	8.00718
CDH2	-3.68695	5.20966	-6.04716	4.85909e-08	6.16304e-07	8.00665
PGD	-0.883068	6.76718	-6.1802	2.76856e-08	3.76316e-07	7.99506
PCED1B	1.31686	1.64764	6.0794	4.24135e-08	5.4602e-07	7.98176
FAM172A	0.732343	5.33437	6.17637	2.81395e-08	3.81532e-07	7.97982
HOMER2	1.45221	2.96435	6.13774	3.31432e-08	4.42389e-07	7.95954
MEF2B	2.75644	-1.52306	6.00104	5.90008e-08	7.33508e-07	7.94851
KBTBD11	-1.4936	6.55233	-6.15975	3.01929e-08	4.07006e-07	7.943
SPR	-1.15239	5.92089	-6.15164	3.12485e-08	4.19847e-07	7.93127
LRRC75A-AS1	1.16712	8.39641	6.13687	3.32655e-08	4.42933e-07	7.92966
STAM2	-0.628109	6.21723	-6.16137	2.99865e-08	4.04558e-07	7.92385
ENO3	-2.82727	1.45729	-5.96403	6.89217e-08	8.43347e-07	7.92139
RPS3	1.1028	9.0997	6.12597	3.48368e-08	4.59728e-07	7.91394
SUCLA2	-0.973758	6.55703	-6.15844	3.03621e-08	4.08948e-07	7.91122
CILP2	2.50947	-2.39242	5.96626	6.82806e-08	8.36758e-07	7.88837
CLEC2B	1.45017	2.1523	6.08486	4.14474e-08	5.35272e-07	7.8844
CXCR4	2.913	4.9174	6.13981	3.28546e-08	4.39255e-07	7.86437
MRPS17	0.564088	3.28574	6.09883	3.90716e-08	5.08211e-07	7.86242
SH3GL1	0.976298	5.66898	6.14691	3.18811e-08	4.2694e-07	7.85971
YEATS2	0.910859	5.09929	6.14599	3.20061e-08	4.28262e-07	7.85479
OMA1	-1.21253	4.72163	-6.08993	4.05687e-08	5.26006e-07	7.85092
TPMT	-1.84865	6.6949	-6.13448	3.36036e-08	4.45979e-07	7.85021
CTAGE1	-1.90511	-1.27573	-5.94155	7.57334e-08	9.12325e-07	7.84976
GDPD5	1.36525	2.17794	6.07494	4.32183e-08	5.55066e-07	7.84667
OXCT1	-2.54605	6.85007	-6.11956	3.57939e-08	4.71214e-07	7.83811
EMILIN2	1.62423	2.62574	6.1007	3.87643e-08	5.05019e-07	7.83481
CREG2	3.53181	-2.71483	5.96122	6.97384e-08	8.52701e-07	7.82817
FAM219A	0.801189	4.30664	6.12601	3.48301e-08	4.59728e-07	7.81799
CXCL16	1.46799	5.70984	6.13371	3.37143e-08	4.47085e-07	7.81794
ADI1	-1.84834	7.76022	-6.13508	3.35193e-08	4.45585e-07	7.80797
ARHGEF7	0.709857	6.0035	6.1334	3.37577e-08	4.47297e-07	7.80465
PLEKHH3	0.968722	3.76374	6.1115	3.70348e-08	4.85591e-07	7.79629
FEZ1	1.31825	2.86796	6.08832	4.08455e-08	5.28755e-07	7.79076
PLOD1	1.34614	7.05707	6.1156	3.63987e-08	4.78404e-07	7.78664
TUBD1	0.766073	2.85769	6.06509	4.50538e-08	5.77276e-07	7.77254
EVA1B	1.32785	3.33928	6.10178	3.85886e-08	5.03132e-07	7.77253
HOXC10	-1.15697	5.52959	-6.09938	3.89814e-08	5.07442e-07	7.75463
MS4A2	3.84971	-1.36955	5.98128	6.41077e-08	7.89774e-07	7.73881
GAPDH	1.1752	11.0417	6.06083	4.58706e-08	5.8728e-07	7.73586
C1QTNF6	1.29649	2.32335	6.04863	4.82906e-08	6.13927e-07	7.72397
ST3GAL6	-2.11478	4.21484	-5.99705	5.99973e-08	7.44676e-07	7.72345
HLTF	-0.866357	5.90445	-6.10489	3.80834e-08	4.97738e-07	7.71743
CHIT1	4.08609	-2.20031	5.95436	7.17758e-08	8.74336e-07	7.70998
GM2A	0.830205	5.94968	6.10848	3.751e-08	4.91427e-07	7.70237
STS	1.45137	4.98072	6.10461	3.8129e-08	4.97936e-07	7.68303
PABPC4	0.693081	6.50271	6.09647	3.94639e-08	5.12905e-07	7.66393
COL8A1	2.69134	3.28002	6.09094	4.03969e-08	5.24196e-07	7.65949
NLGN4X	1.73097	1.8117	6.02454	5.34471e-08	6.74227e-07	7.65807
TAPBP	1.18682	7.22549	6.08392	4.16108e-08	5.36533e-07	7.65591
RAPGEF3	-1.5066	6.46705	-6.08946	4.06494e-08	5.26634e-07	7.65588
OR51E2	3.23001	-0.993337	5.95616	7.12353e-08	8.68912e-07	7.65575
SH3BP2	1.64145	5.93656	6.0911	4.03695e-08	5.24196e-07	7.65157
PPP1R21	-1.03223	5.90008	-6.08571	4.12986e-08	5.34196e-07	7.64994
RASEF	1.04803	3.0908	6.05538	4.69351e-08	5.99968e-07	7.64389
TRPM8	3.76119	-3.38057	5.90266	8.91243e-08	1.05412e-06	7.63021
BCL7A	-1.32593	5.45877	-6.06054	4.5925e-08	5.87516e-07	7.6263
FAM35BP	-1.21397	4.13112	-6.00741	5.74402e-08	7.18487e-07	7.62381
IL20RA	-3.87594	-0.399189	-5.88775	9.48523e-08	1.11305e-06	7.61913
NOVA1	-2.01804	3.0256	-5.92644	8.0682e-08	9.634e-07	7.60001
MPZL2	2.25375	5.42223	6.0775	4.2754e-08	5.49969e-07	7.59901
NXN	1.32617	4.47312	6.07684	4.28741e-08	5.5108e-07	7.57682
DTX2	0.903469	2.91008	6.02358	5.36645e-08	6.76447e-07	7.57078
GPR161	1.36909	1.53775	5.9762	6.54886e-08	8.04962e-07	7.5639
ARRDC2	1.8721	4.57589	6.07125	4.3897e-08	5.63339e-07	7.54764
TSHR	1.92647	-2.2607	5.87191	1.01341e-07	1.18154e-06	7.5322
NLK	-0.741921	5.32411	-6.04798	4.84222e-08	6.14817e-07	7.5218
CD81	0.898267	9.28299	6.0295	5.23419e-08	6.6182e-07	7.51346
DLX4	2.57966	-3.16685	5.8599	1.06549e-07	1.23277e-06	7.50005
QPCTL	0.958043	2.81316	6.00378	5.8325e-08	7.26214e-07	7.49833
ZNF667	1.1	2.52926	5.9969	6.00361e-08	7.44676e-07	7.49669
NGFR	2.78977	3.06228	6.04792	4.8436e-08	6.14817e-07	7.49204
EBPL	0.913815	3.72698	6.03529	5.10817e-08	6.46889e-07	7.48887
ENC1	1.74823	5.23619	6.05455	4.71008e-08	6.01614e-07	7.485
CYTH1	0.688807	5.12127	6.05265	4.74792e-08	6.05973e-07	7.46992
ASAP1	1.25598	5.22574	6.05204	4.76011e-08	6.07054e-07	7.4636
EPHX3	1.96318	1.82002	5.9875	6.24543e-08	7.71736e-07	7.45256
S100A3	2.31693	-0.255761	5.907	8.75198e-08	1.03745e-06	7.44903
PABPC1	0.895518	9.0173	6.01686	5.52033e-08	6.93165e-07	7.44894
EIF3L	0.497642	8.55365	6.02309	5.3775e-08	6.77316e-07	7.43688
FXN	-0.986677	3.71118	-5.95168	7.25854e-08	8.79599e-07	7.4367
HPS5	-0.567943	5.2607	-6.02706	5.28826e-08	6.68139e-07	7.42592
RAD51	1.79758	-0.60421	5.87654	9.94002e-08	1.16223e-06	7.42569
DZIP3	-1.08689	5.46824	-6.01372	5.59357e-08	7.01821e-07	7.39975
CAV1	2.25536	5.96558	6.02501	5.33418e-08	6.73419e-07	7.39967
NANP	-0.901276	3.42476	-5.92923	7.97469e-08	9.5363e-07	7.3857
SSR2	0.720871	7.4971	6.0197	5.45461e-08	6.85441e-07	7.38293
TCP11L1	0.975025	3.54913	6.00485	5.80621e-08	7.24045e-07	7.38093
GMFB	-0.787263	6.6598	-6.03243	5.17002e-08	6.54214e-07	7.37984
BBC3	1.47044	1.62787	5.93914	7.65034e-08	9.2092e-07	7.37551
CSNK2A2	0.536518	4.72835	6.02041	5.43842e-08	6.83933e-07	7.36347
MCUR1	-1.22098	4.44754	-5.95809	7.06617e-08	8.63343e-07	7.36165
DAPP1	2.3025	1.1902	5.94766	7.38205e-08	8.92577e-07	7.35603
TOMM20	0.66745	8.2023	6.00253	5.86331e-08	7.29492e-07	7.34226
XYLT2	0.864265	5.18618	6.02288	5.38217e-08	6.77381e-07	7.34184
TRIM46	1.86393	-1.33605	5.83771	1.16874e-07	1.34154e-06	7.33433
ACOT11	-2.2849	5.52052	-5.95289	7.22171e-08	8.7709e-07	7.32182
ERO1B	-0.841142	4.99131	-5.9853	6.30347e-08	7.7773e-07	7.31497
ISG20	1.82065	1.29105	5.92001	8.28824e-08	9.86065e-07	7.31236
P2RY1	2.21432	-0.00811354	5.87397	1.00473e-07	1.17394e-06	7.30034
MEF2D	0.974463	6.29638	6.00785	5.73349e-08	7.18272e-07	7.29774
DOK1	1.10318	2.78958	5.95653	7.11234e-08	8.68333e-07	7.28322
TP53	0.994916	5.35642	6.0085	5.71782e-08	7.16859e-07	7.2812
TMEM50B	-0.806315	6.45831	-6.00665	5.76259e-08	7.20258e-07	7.27801
PCMTD1	-0.639148	6.96747	-6.00747	5.74261e-08	7.18487e-07	7.27644
EML3	0.78352	4.99518	6.00508	5.80062e-08	7.23901e-07	7.27441
ACKR3	1.68457	4.41631	6.00397	5.82787e-08	7.2619e-07	7.27036
MMP16	3.21948	-1.47063	5.84481	1.13469e-07	1.30798e-06	7.26855
LSP1	2.49229	3.19618	5.9932	6.09772e-08	7.55774e-07	7.2646
PCNX4	-0.804605	5.86125	-5.99158	6.13923e-08	7.59764e-07	7.24661
RSL24D1	0.902353	6.4576	5.99203	6.12771e-08	7.58914e-07	7.23508
LRRC75B	2.10615	3.4925	5.98638	6.27485e-08	7.74785e-07	7.23364
YIPF4	-0.634313	5.20376	-5.97713	6.52339e-08	8.02436e-07	7.23057
CEP131	0.975433	2.92932	5.94441	7.48308e-08	9.03453e-07	7.22772
WWP2	0.786253	6.64349	5.98852	6.21873e-08	7.6902e-07	7.22324
SH3D21	1.269	2.36564	5.92592	8.08576e-08	9.6479e-07	7.21646
DUSP14	0.937575	3.85445	5.96863	6.76046e-08	8.29434e-07	7.19899
PPFIA1	-0.654774	6.11667	-5.98411	6.33501e-08	7.8103e-07	7.19241
TFAP2A	1.33496	4.4549	5.97985	6.44929e-08	7.93919e-07	7.17558
ZNF830	0.486299	3.90067	5.95325	7.21105e-08	8.76491e-07	7.17312
IMPDH1	0.919731	4.01776	5.96601	6.83513e-08	8.36996e-07	7.17096
GSTZ1	-1.50889	4.31149	-5.89003	9.39539e-08	1.10489e-06	7.16344
ABHD16A	-0.573673	5.58618	-5.96853	6.76321e-08	8.29434e-07	7.15605
BLOC1S3	0.671778	3.45653	5.93735	7.70776e-08	9.26331e-07	7.15205
NNMT	4.67917	4.93504	5.94609	7.43053e-08	8.97773e-07	7.1326
TMEM87A	0.894691	6.20618	5.96868	6.75893e-08	8.29434e-07	7.13099
CENPJ	0.985963	2.02675	5.87784	9.8864e-08	1.15679e-06	7.12695
ITGB1	1.17757	9.18409	5.93312	7.8456e-08	9.40261e-07	7.1221
TMEM56	-1.40919	5.01354	-5.91771	8.36844e-08	9.94156e-07	7.11696
EIF3H	0.504908	7.44848	5.954	7.18836e-08	8.74995e-07	7.10102
SEMA4B	1.81241	6.16482	5.95324	7.2114e-08	8.76491e-07	7.0941
NONO	0.384074	8.2179	5.94237	7.54756e-08	9.09891e-07	7.08283
GABRB3	-3.7562	4.35117	-5.78785	1.4381e-07	1.61215e-06	7.06774
SMPD1	-1.11252	6.42752	-5.95236	7.23788e-08	8.78401e-07	7.06702
PRKAA2	-1.05444	6.79713	-5.95602	7.12773e-08	8.68912e-07	7.06621
UBC	1.18866	10.5663	5.9025	8.91845e-08	1.05412e-06	7.06093
LRRC19	-4.35594	5.73121	-5.81093	1.30658e-07	1.47997e-06	7.05574
AKAP7	-0.986699	3.61484	-5.8515	1.10345e-07	1.27287e-06	7.05092
TAL1	1.23274	2.45	5.88894	9.43845e-08	1.10889e-06	7.05088
FLT1	2.25595	7.34189	5.92559	8.09691e-08	9.65414e-07	7.05085
DCHS1	1.64677	5.17974	5.95025	7.30236e-08	8.84253e-07	7.04908
TMEM33	-0.673658	6.68791	-5.95185	7.25343e-08	8.79599e-07	7.04517
HRC	1.46939	2.5012	5.89705	9.12394e-08	1.07607e-06	7.04443
PAX8	-1.45485	7.88716	-5.94976	7.31736e-08	8.85411e-07	7.0426
RBMX2	0.555523	3.94376	5.9237	8.16116e-08	9.71654e-07	7.03886
GRM5	-3.54208	-0.290983	-5.73591	1.78381e-07	1.94231e-06	7.03859
LBH	1.39408	6.80594	5.93721	7.71232e-08	9.26331e-07	7.03838
MOB1A	-0.785416	5.7698	-5.93772	7.69603e-08	9.25737e-07	7.02939
C10orf10	2.76277	6.36286	5.9247	8.1273e-08	9.68331e-07	7.02307
TMEM192	-1.32205	6.03493	-5.93066	7.92706e-08	9.4863e-07	7.01956
AAK1	-0.863647	6.49932	-5.94357	7.50969e-08	9.05996e-07	7.01785
NLGN2	1.12086	4.13104	5.93407	7.81466e-08	9.37242e-07	7.01637
PSORS1C2	2.72992	-4.81702	5.7279	1.84391e-07	2.00043e-06	7.01241
BHMT2	-2.76283	7.82518	-5.93511	7.7804e-08	9.33819e-07	7.00698
DHTKD1	-2.1549	6.54367	-5.91895	8.32505e-08	9.89722e-07	6.99926
RBMX	0.553189	7.0738	5.93085	7.92066e-08	9.4856e-07	6.99274
YBX3	1.45347	6.66595	5.92677	8.05696e-08	9.62762e-07	6.99158
PEX26	-0.686202	5.18787	-5.90785	8.72101e-08	1.03453e-06	6.95312
TOB2P1	1.52083	0.0724206	5.77118	1.5412e-07	1.71711e-06	6.9492
MORN5	-3.07995	-0.920901	-5.71367	1.95574e-07	2.107e-06	6.9482
LRRC43	-2.75571	1.06962	-5.7161	1.93616e-07	2.08867e-06	6.94586
NUDT12	-1.29114	5.68298	-5.90432	8.85056e-08	1.04762e-06	6.94473
TNNT1	3.93131	-5.08043	5.71011	1.98473e-07	2.1326e-06	6.93201
CHAF1A	0.99257	2.76155	5.86499	1.04311e-07	1.21011e-06	6.92945
ZNF226	0.530126	3.73145	5.88882	9.44302e-08	1.10889e-06	6.92803
VWA2	2.32294	1.61297	5.86169	1.05754e-07	1.22511e-06	6.9199
ACBD7	-2.36244	0.412544	-5.70747	2.00648e-07	2.15031e-06	6.91985
PTPRF	0.953438	8.16116	5.89765	9.10089e-08	1.07413e-06	6.91959
MOB3A	0.853077	5.44136	5.91444	8.4839e-08	1.00714e-06	6.89215
GNB1	0.351401	8.77485	5.88752	9.49458e-08	1.11334e-06	6.88209
RPL37	0.943029	8.31288	5.88511	9.59038e-08	1.12377e-06	6.875
MRPL23-AS1	2.75304	-2.21936	5.72024	1.90331e-07	2.05732e-06	6.87241
SDC1	1.86685	8.68361	5.87091	1.01763e-07	1.18561e-06	6.87179
C15orf48	2.1977	0.600426	5.79252	1.41051e-07	1.58667e-06	6.86304
THSD7A	-2.29764	5.77847	-5.85153	1.10334e-07	1.27287e-06	6.86041
BTBD3	0.770341	5.86296	5.90502	8.82462e-08	1.0453e-06	6.85684
P4HA3	2.25046	-0.29446	5.75802	1.62764e-07	1.80234e-06	6.85623
LINC00341	1.74183	1.20271	5.79947	1.37035e-07	1.54683e-06	6.85159
TSG1	-3.89831	-2.63551	-5.71797	1.92124e-07	2.07532e-06	6.8452
NIFK	0.713399	4.57258	5.8934	9.26387e-08	1.09178e-06	6.83963
ACOT12	-6.01511	0.562672	-5.6952	2.1109e-07	2.25039e-06	6.83722
ATF7IP2	-1.26516	2.34826	-5.73856	1.76432e-07	1.92623e-06	6.83618
MPC2	-1.08837	6.58874	-5.89785	9.09334e-08	1.07402e-06	6.83399
SLC46A3	-0.946295	5.26298	-5.87244	1.01118e-07	1.17978e-06	6.82887
ETFA	-1.51483	6.71597	-5.89289	9.28373e-08	1.09334e-06	6.82735
NFKBIL1	0.837946	3.94096	5.87315	1.00818e-07	1.17712e-06	6.80467
ATPAF1	-1.02981	6.91332	-5.89155	9.3361e-08	1.09871e-06	6.79818
BHLHB9	-0.999214	3.75562	-5.7946	1.39834e-07	1.57516e-06	6.78904
ALAS1	-1.0656	6.22451	-5.87978	9.80633e-08	1.14825e-06	6.77771
CAPRIN2	-0.895224	3.8967	-5.8004	1.36503e-07	1.5419e-06	6.76761
EFEMP1	1.71482	7.13901	5.86281	1.05263e-07	1.22029e-06	6.76074
B3GNT7	1.20416	2.34297	5.80838	1.32048e-07	1.49365e-06	6.75384
SERPINA3	4.0257	3.80717	5.86755	1.03201e-07	1.19809e-06	6.75272
ITGA5	2.13069	5.89345	5.86931	1.02446e-07	1.19186e-06	6.75034
FCHSD1	1.01857	2.84485	5.82304	1.24236e-07	1.4141e-06	6.73663
TSNARE1	0.824801	3.28659	5.8338	1.18794e-07	1.35976e-06	6.73289
DUSP3	-0.654676	7.66125	-5.86995	1.02171e-07	1.18951e-06	6.72702
MEGF11	3.73888	-0.332601	5.76997	1.5489e-07	1.72452e-06	6.71231
PTRF	1.59528	8.1067	5.84124	1.15167e-07	1.32662e-06	6.71218
GSN	1.4166	8.8382	5.83356	1.18912e-07	1.36014e-06	6.70723
NCK2	0.675674	5.56253	5.86856	1.02767e-07	1.19475e-06	6.70292
NUP62	0.559746	5.51337	5.86762	1.0317e-07	1.19809e-06	6.69965
MAP4K4	1.30644	6.25816	5.85986	1.06567e-07	1.23277e-06	6.69644
LGALS1	2.04531	5.94152	5.85386	1.09266e-07	1.2631e-06	6.68537
CABYR	1.54035	-0.871276	5.67879	2.25877e-07	2.39084e-06	6.68087
LGALS3BP	1.05723	8.77305	5.82796	1.21716e-07	1.38833e-06	6.66678
FES	1.1675	3.72433	5.83861	1.16437e-07	1.33746e-06	6.65584
HADH	-1.85972	7.25278	-5.85191	1.1016e-07	1.27253e-06	6.6489
RGMB	0.800077	4.16242	5.83682	1.1731e-07	1.3456e-06	6.63475
IDE	-0.887457	4.9651	-5.81702	1.27386e-07	1.44693e-06	6.63435
DNAAF1	-2.07244	-0.286151	-5.63128	2.74715e-07	2.83779e-06	6.63084
KANSL1L	-0.717507	5.90047	-5.83996	1.15786e-07	1.3328e-06	6.61446
RAP1GAP	-2.89464	7.77693	-5.83615	1.17635e-07	1.34838e-06	6.61324
RPL31	1.23378	8.69962	5.81243	1.29845e-07	1.47179e-06	6.60714
S1PR1	1.36585	5.98649	5.83964	1.15936e-07	1.33359e-06	6.607
FRZB	2.58499	5.25062	5.83496	1.18222e-07	1.35416e-06	6.60283
MIR9-3HG	1.85053	1.6246	5.76492	1.58174e-07	1.75868e-06	6.60188
WISP2	3.7605	-2.07818	5.67161	2.32673e-07	2.45163e-06	6.58667
CAPN11	3.03028	-3.43972	5.63054	2.75548e-07	2.841e-06	6.58567
MRPS10	-0.653667	5.65975	-5.8297	1.20837e-07	1.37926e-06	6.58517
SLC25A39	-1.03776	7.33421	-5.83873	1.1638e-07	1.33746e-06	6.58226
TGFB3	1.65037	3.48477	5.82251	1.24511e-07	1.41625e-06	6.58096
CNRIP1	1.05638	3.32336	5.8035	1.34757e-07	1.52323e-06	6.57431
F8	1.44675	5.81116	5.83191	1.1973e-07	1.36855e-06	6.57269
GPRC5A	1.94698	5.10391	5.83108	1.20146e-07	1.37234e-06	6.56553
KCTD10	0.788138	6.67199	5.82643	1.22496e-07	1.39625e-06	6.55738
C9orf172	1.86759	-1.87539	5.63039	2.75722e-07	2.841e-06	6.5505
INAFM1	1.08843	2.28664	5.75239	1.6661e-07	1.8362e-06	6.55005
HIVEP3	0.918112	2.59373	5.7599	1.61503e-07	1.79202e-06	6.54903
MRPS16	-0.520057	6.48275	-5.8254	1.23021e-07	1.40126e-06	6.52578
NOTCH4	1.60812	5.48842	5.82045	1.25582e-07	1.42743e-06	6.52193
HOGA1	-3.36283	6.29129	-5.74299	1.73226e-07	1.89934e-06	6.51328
LOC100126784	1.6765	-0.229699	5.65622	2.47905e-07	2.5821e-06	6.5102
BEST4	1.76097	-1.65958	5.62249	2.84829e-07	2.92008e-06	6.50678
MAZ	0.772215	6.30456	5.81396	1.29019e-07	1.46446e-06	6.49462
CDC45	3.03128	-2.82177	5.61621	2.92274e-07	2.98702e-06	6.48951
MLIP	2.48719	-2.45831	5.61268	2.9655e-07	3.02125e-06	6.48321
CYB5R3	0.924675	8.18225	5.79058	1.42188e-07	1.59837e-06	6.48131
BCL2L13	-0.593812	6.70575	-5.81317	1.29443e-07	1.46826e-06	6.47509
ZNF337	0.799919	3.82962	5.78894	1.43162e-07	1.60709e-06	6.47471
EXOC3	0.676572	6.09784	5.81043	1.30926e-07	1.48198e-06	6.47211
TMEM86A	-1.59834	5.22631	-5.75884	1.62214e-07	1.79869e-06	6.46524
KCNMB1	2.01053	1.69338	5.73835	1.76585e-07	1.92661e-06	6.46202
RPL41	0.944038	9.08394	5.77461	1.51938e-07	1.69511e-06	6.459
NAT2	-2.8999	-0.00474162	-5.58548	3.31576e-07	3.34674e-06	6.45894
KLHDC9	-1.51391	3.28017	-5.6678	2.36354e-07	2.48401e-06	6.45357
GPR155	-2.41695	5.49344	-5.73095	1.8208e-07	1.9773e-06	6.44281
DVL2	0.519392	4.60204	5.7875	1.44023e-07	1.61344e-06	6.41597
BPNT1	-0.738784	5.38196	-5.7805	1.48271e-07	1.65761e-06	6.41567
PRKD2	0.805586	5.42741	5.79819	1.37763e-07	1.55397e-06	6.41529
GPD1L	-1.16513	6.61357	-5.79399	1.40191e-07	1.57809e-06	6.41049
CTDNEP1	0.486143	6.26548	5.79524	1.39463e-07	1.57207e-06	6.40967
DNAJA4	-1.2329	5.0761	-5.75183	1.66996e-07	1.83922e-06	6.40053
RGS10	1.39596	3.01511	5.75658	1.6374e-07	1.80946e-06	6.39456
SMPDL3B	1.48832	3.15537	5.76446	1.58472e-07	1.76079e-06	6.39378
APOBEC3C	1.31491	2.75477	5.74362	1.72773e-07	1.89643e-06	6.39131
GDAP2	-0.692126	4.48026	-5.74509	1.71721e-07	1.88681e-06	6.39105
MYBL2	3.19192	-1.88155	5.6147	2.94098e-07	3.0019e-06	6.38906
LNX2	-0.540855	5.01433	-5.76902	1.55507e-07	1.73021e-06	6.389
GIMAP4	1.35645	5.36817	5.78943	1.42868e-07	1.60491e-06	6.38592
SLC25A20	-1.39221	4.97032	-5.73703	1.77551e-07	1.93456e-06	6.3852
DNM1L	-0.604186	6.59225	-5.78823	1.43584e-07	1.61073e-06	6.37369
PMP22	1.37641	5.62439	5.78403	1.46113e-07	1.63572e-06	6.37029
ROR2	1.2035	2.68022	5.73196	1.81319e-07	1.9716e-06	6.36308
WDR63	-2.56302	0.190437	-5.56251	3.64303e-07	3.63879e-06	6.362
RBM15B	0.651415	6.03704	5.78068	1.4816e-07	1.6575e-06	6.34862
EPM2A	-1.60167	4.28983	-5.68458	2.20546e-07	2.33744e-06	6.34799
SLC48A1	-1.19564	6.49428	-5.77569	1.51257e-07	1.68868e-06	6.3431
SETDB1	0.50059	5.13367	5.77636	1.5084e-07	1.68517e-06	6.33797
SEMA3F	1.43375	5.8357	5.77136	1.54002e-07	1.71697e-06	6.32586
ZNF280B	-2.21927	0.268076	-5.55322	3.78418e-07	3.74993e-06	6.31748
ROPN1L	1.67452	-1.31603	5.57839	3.41353e-07	3.43268e-06	6.31334
PLD2	0.907483	4.31411	5.76275	1.596e-07	1.77211e-06	6.31288
FAM118A	0.737067	2.9539	5.71156	1.97286e-07	2.12265e-06	6.31007
PRKAG2	-0.950146	5.76446	-5.75838	1.62519e-07	1.80085e-06	6.30709
GP6	2.39631	-2.96877	5.55777	3.71433e-07	3.69643e-06	6.30445
STRBP	-0.844878	5.08244	-5.74165	1.7419e-07	1.90686e-06	6.30391
ARHGAP25	1.13372	3.44278	5.74276	1.73387e-07	1.89934e-06	6.30385
ARID5A	1.58233	3.65735	5.75252	1.66519e-07	1.8362e-06	6.28548
NACAP1	0.740465	1.87928	5.64842	2.56001e-07	2.66303e-06	6.2701
DDX42	0.519275	6.92578	5.75473	1.65002e-07	1.82218e-06	6.2651
TRPV4	-1.77299	5.1025	-5.69549	2.10832e-07	2.2491e-06	6.26364
NRL	-1.39883	1.6079	-5.57161	3.50965e-07	3.52066e-06	6.2627
BCKDK	0.959412	6.10188	5.75724	1.63294e-07	1.80575e-06	6.26237
JAM3	1.08606	5.45454	5.75749	1.63123e-07	1.80509e-06	6.252
PPM1H	-1.47864	6.08371	-5.74039	1.75097e-07	1.91422e-06	6.25038
PLEC	1.35507	7.89912	5.73181	1.81434e-07	1.9716e-06	6.24644
CYFIP2	-2.25689	9.58638	-5.74751	1.70009e-07	1.86987e-06	6.24606
FLI1	1.25403	4.48737	5.75291	1.66252e-07	1.83473e-06	6.246
XRCC1	0.603349	4.92252	5.75143	1.67269e-07	1.84098e-06	6.24281
ABHD10	-1.29027	6.24552	-5.74501	1.71781e-07	1.88681e-06	6.23978
RABL3	-0.473593	5.47215	-5.74278	1.73376e-07	1.89934e-06	6.23229
TDP1	0.577124	3.86851	5.72376	1.87579e-07	2.03026e-06	6.2277
C17orf107	1.20115	1.98202	5.6612	2.42872e-07	2.54105e-06	6.22492
MAN1C1	-1.78535	5.82765	-5.71765	1.92385e-07	2.07676e-06	6.22314
TBC1D22A	0.597659	4.40529	5.73367	1.80043e-07	1.95909e-06	6.2079
RPS2	1.09806	7.89434	5.72235	1.88677e-07	2.04079e-06	6.19705
PEAK1	1.10698	5.98639	5.74073	1.74852e-07	1.91281e-06	6.1961
OGDHL	-2.90271	8.17717	-5.73948	1.75761e-07	1.92019e-06	6.19542
SUV39H1	0.634065	2.85409	5.66919	2.35003e-07	2.47139e-06	6.17544
FAM49A	1.71631	1.00474	5.6218	2.85635e-07	2.92651e-06	6.17027
ABLIM1	-0.76131	8.40509	-5.72782	1.84455e-07	2.00043e-06	6.1689
MESDC2	0.505152	6.04256	5.73707	1.77525e-07	1.93456e-06	6.16809
GRIA2	3.67642	-1.75684	5.57118	3.5159e-07	3.52476e-06	6.16394
TAGLN2	1.31638	8.19537	5.70773	2.00439e-07	2.14948e-06	6.16069
MPP7	-3.18575	5.736	-5.63554	2.69943e-07	2.79558e-06	6.15635
PARK2	-2.52441	4.81778	-5.6194	2.88472e-07	2.95186e-06	6.14962
CRABP2	1.68307	2.7122	5.69233	2.13607e-07	2.27244e-06	6.13978
KTN1-AS1	-1.39629	1.38012	-5.53501	4.07673e-07	4.01785e-06	6.13917
CENPK	2.05959	-1.22671	5.54371	3.93435e-07	3.88693e-06	6.13638
LRRC70	1.06531	2.21147	5.64609	2.58471e-07	2.6853e-06	6.13473
SDHC	-1.05745	7.65202	-5.72719	1.84938e-07	2.00433e-06	6.13348
RPL28	1.22236	8.0736	5.7011	2.06002e-07	2.20479e-06	6.12457
WNT9A	1.9008	-2.07692	5.51903	4.35184e-07	4.26836e-06	6.1219
PLOD3	0.912906	5.66997	5.7243	1.87158e-07	2.02704e-06	6.11708
PXK	-1.41352	4.78082	-5.6592	2.44887e-07	2.55885e-06	6.10761
CTXN1	1.56455	2.21216	5.65664	2.47481e-07	2.57934e-06	6.09571
RARG	1.09676	4.1748	5.70953	1.98952e-07	2.13634e-06	6.09457
YWHAEP7	-2.05061	-0.391766	-5.49208	4.85741e-07	4.70203e-06	6.09305
DIEXF	0.65573	4.70922	5.71161	1.97243e-07	2.12265e-06	6.09054
AGL	-0.856776	6.31594	-5.7147	1.94739e-07	2.0994e-06	6.08782
CROT	-0.934406	5.49515	-5.69724	2.09314e-07	2.23583e-06	6.08298
TP53AIP1	1.86017	-1.00546	5.53117	4.14131e-07	4.07412e-06	6.08168
TPI1P2	-2.20945	0.717908	-5.49688	4.76334e-07	4.62744e-06	6.08027
JAG1	1.3505	7.46	5.69258	2.13383e-07	2.27186e-06	6.06621
SCMH1	0.496735	5.55548	5.71057	1.98096e-07	2.12996e-06	6.0585
C3orf58	0.974911	4.52195	5.70442	2.03193e-07	2.17615e-06	6.0578
PLEKHG1	1.06954	4.98384	5.70878	1.99566e-07	2.14153e-06	6.0546
ZNF423	1.21612	2.55125	5.64626	2.5829e-07	2.68513e-06	6.05066
CCDC85B	1.73332	2.90998	5.67917	2.25529e-07	2.38871e-06	6.0494
VKORC1	1.03964	6.25349	5.69971	2.07191e-07	2.21606e-06	6.03514
DACT3	1.59392	3.00453	5.67257	2.31756e-07	2.44513e-06	6.0322
NCAPH2	0.657845	4.75873	5.69595	2.10431e-07	2.24629e-06	6.02418
ANO3	2.11759	1.59746	5.62631	2.80386e-07	2.87815e-06	6.02406
COL4A3	-2.35217	6.12589	-5.65884	2.45249e-07	2.56098e-06	6.02134
CASP2	0.707348	5.02945	5.69777	2.08861e-07	2.23246e-06	6.01566
ROBO4	1.2493	5.92661	5.69384	2.12272e-07	2.26151e-06	6.00781
PHLDB2	-0.680908	7.16302	-5.6922	2.13716e-07	2.27244e-06	5.98717
SSC4D	-2.85525	2.89862	-5.49996	4.70388e-07	4.57296e-06	5.97861
ERG	1.1046	5.21122	5.69017	2.15519e-07	2.29011e-06	5.97703
DENND5A	0.678826	6.31608	5.68718	2.18191e-07	2.31701e-06	5.97632
EIF4B	0.72434	8.97033	5.65835	2.45741e-07	2.56448e-06	5.97309
CDKN2B-AS1	2.2788	-5.06837	5.45775	5.5857e-07	5.32933e-06	5.97103
CDCP1	2.12411	4.83193	5.68487	2.20286e-07	2.3362e-06	5.96942
ZNF473	0.629161	3.20666	5.63505	2.7049e-07	2.79769e-06	5.96906
NLRP11	-3.05974	-0.983584	-5.45769	5.58712e-07	5.32933e-06	5.968
RPL37A	0.867417	8.67564	5.65772	2.46378e-07	2.56948e-06	5.9625
KDM3A	0.76441	5.73781	5.6855	2.19716e-07	2.33167e-06	5.95825
LHFP	1.7594	5.66084	5.67857	2.26083e-07	2.39146e-06	5.95289
VPS13A	-0.996002	5.86711	-5.67093	2.33326e-07	2.45693e-06	5.94745
CDK2	0.756062	4.32796	5.67037	2.33865e-07	2.46102e-06	5.94566
NDUFAF6	-0.838456	2.99132	-5.55445	3.76525e-07	3.73571e-06	5.94245
TAL2	-3.41335	-0.574714	-5.45002	5.76398e-07	5.4788e-06	5.93976
RELA	0.58036	6.41202	5.67763	2.26967e-07	2.39926e-06	5.93772
AHCYL2	-1.54922	6.23298	-5.66442	2.39674e-07	2.51081e-06	5.93387
PTPN12	0.843253	6.08533	5.6767	2.27835e-07	2.40688e-06	5.93175
ICMT	-0.590717	7.2944	-5.67555	2.28921e-07	2.41679e-06	5.92485
KIT	-1.91019	5.89861	-5.64131	2.63603e-07	2.73513e-06	5.92063
TBXA2R	1.77292	2.53153	5.63064	2.75441e-07	2.841e-06	5.91828
CHML	0.944398	4.36204	5.66467	2.39429e-07	2.50985e-06	5.90876
TUBGCP5	-0.888665	4.08336	-5.59679	3.16543e-07	3.2089e-06	5.90472
PNP	-1.56387	7.52985	-5.67201	2.32285e-07	2.44913e-06	5.90284
RAPGEF5	1.44059	5.49399	5.66723	2.36915e-07	2.48829e-06	5.89388
WWC1	-0.884716	7.84884	-5.66531	2.38799e-07	2.50485e-06	5.89254
P4HB	0.827942	9.03452	5.636	2.69435e-07	2.79209e-06	5.88995
FLT4	1.60993	5.34827	5.66574	2.38368e-07	2.50194e-06	5.8888
SYT9	-3.80174	2.45022	-5.44847	5.80056e-07	5.50716e-06	5.87873
ARFGEF2	-0.766674	7.04265	-5.66377	2.40318e-07	2.51593e-06	5.86874
PTTG1IP	1.08802	8.95927	5.62813	2.78295e-07	2.86379e-06	5.86495
C20orf27	0.728579	4.10252	5.64254	2.62279e-07	2.72313e-06	5.85704
FUCA2	-0.558887	6.51532	-5.66103	2.4304e-07	2.54117e-06	5.85697
PLEKHS1	3.76673	-0.380944	5.56133	3.66067e-07	3.65417e-06	5.85118
DUSP5P1	3.07169	-4.31585	5.43177	6.20737e-07	5.82557e-06	5.84694
RAG1	-1.27944	2.83083	-5.50648	4.58039e-07	4.46835e-06	5.8461
POF1B	2.37968	2.7944	5.63812	2.67092e-07	2.76957e-06	5.84579
SEPSECS	-1.10957	5.04174	-5.61743	2.90812e-07	2.97394e-06	5.84532
TMEM232	-1.49233	2.20584	-5.47586	5.18909e-07	4.99936e-06	5.83192
RNF14	-0.653302	6.50781	-5.65077	2.53536e-07	2.63908e-06	5.81685
ANXA1	1.94434	6.32775	5.63422	2.71417e-07	2.8055e-06	5.80347
CLCN4	-1.31823	4.44558	-5.56912	3.54565e-07	3.5524e-06	5.7963
SPOCK1	-2.98287	6.47981	-5.58649	3.30207e-07	3.33499e-06	5.76799
CELF5	2.20997	-1.5038	5.44543	5.87262e-07	5.56262e-06	5.76233
LOC653786	2.34549	-4.28646	5.40525	6.91197e-07	6.42034e-06	5.76116
MEGF9	-0.820033	6.44688	-5.63525	2.70269e-07	2.79718e-06	5.75969
GUCY1A3	1.27039	6.71177	5.62465	2.82303e-07	2.896e-06	5.75489
ACTN2	-2.73247	-0.870826	-5.40025	7.05332e-07	6.53303e-06	5.75251
LGALSL	0.736882	4.69139	5.62831	2.78094e-07	2.86363e-06	5.75094
FAM184B	-6.353	0.238687	-5.41254	6.71069e-07	6.24761e-06	5.75069
RPS23	0.82017	8.97651	5.60164	3.10302e-07	3.15152e-06	5.74856
CDCA4	0.832735	2.4495	5.55215	3.80087e-07	3.76418e-06	5.74828
HERC5	-0.772174	3.91075	-5.55344	3.78083e-07	3.74889e-06	5.74511
KCNS3	1.5621	3.7654	5.62022	2.87499e-07	2.94375e-06	5.73721
C11orf57	0.480914	5.46399	5.63052	2.75574e-07	2.841e-06	5.73607
ACKR2	1.62557	2.45701	5.58096	3.37781e-07	3.40305e-06	5.73035
TBC1D2B	1.12922	5.55031	5.6271	2.79479e-07	2.87064e-06	5.7256
MANBA	0.635492	5.49199	5.62799	2.78461e-07	2.86379e-06	5.72396
DLG1	-0.532666	6.51227	-5.62778	2.78704e-07	2.86449e-06	5.72238
GJB5	2.83605	-2.8719	5.41572	6.62496e-07	6.18899e-06	5.71699
PRKCSH	0.779026	7.69764	5.60704	3.03491e-07	3.08811e-06	5.70816
APOC1	2.57343	0.902243	5.53161	4.13383e-07	4.06922e-06	5.70256
TUBA1A	1.60817	6.80496	5.60733	3.03138e-07	3.08644e-06	5.7024
SEPT4	1.71071	4.16037	5.61595	2.92586e-07	2.98833e-06	5.69366
UGT3A1	-7.91905	6.07966	-5.39809	7.11536e-07	6.58302e-06	5.69245
SLC6A4	-4.18716	0.124247	-5.38389	7.53602e-07	6.91339e-06	5.68946
PRKCH	0.864668	5.02675	5.61453	2.94301e-07	3.00209e-06	5.67536
NAV2	-1.7559	6.47701	-5.59968	3.12808e-07	3.175e-06	5.66827
TXNRD1	-0.59659	6.689	-5.61289	2.96284e-07	3.02043e-06	5.6618
TCHP	-0.7284	4.04608	-5.53975	3.99854e-07	3.94318e-06	5.65247
EEF1G	0.62257	9.56661	5.57248	3.49718e-07	3.51247e-06	5.65077
PAQR7	-1.16594	6.55411	-5.60442	3.06783e-07	3.11966e-06	5.64421
DENND2C	0.912551	1.21693	5.46833	5.3506e-07	5.1217e-06	5.64175
ITGA7	1.97534	4.50326	5.6033	3.08189e-07	3.132e-06	5.63269
SEZ6L2	3.02295	3.58294	5.59697	3.16307e-07	3.20851e-06	5.62445
MYO1E	0.966051	6.72201	5.59328	3.21134e-07	3.24924e-06	5.61832
ZNF664	-0.613022	7.78624	-5.59467	3.19307e-07	3.23291e-06	5.61287
HMCN1	1.77354	3.87726	5.59067	3.24582e-07	3.28021e-06	5.60249
TGFBI	3.98642	6.65772	5.5587	3.70021e-07	3.68462e-06	5.59972
LINC00094	0.520811	5.43214	5.59557	3.18125e-07	3.22295e-06	5.59515
SATB2	-1.87673	4.01157	-5.4711	5.29056e-07	5.07912e-06	5.59452
IFNGR2	0.787274	5.96014	5.59314	3.21318e-07	3.24924e-06	5.58976
CD34	1.21528	7.39648	5.57499	3.46136e-07	3.47863e-06	5.5832
FAM92A1	-1.24982	3.54289	-5.47083	5.29633e-07	5.08167e-06	5.57691
LINC01018	-5.33918	1.59466	-5.35319	8.53076e-07	7.66218e-06	5.57407
TNPO3	-0.498481	5.774	-5.58061	3.38262e-07	3.4058e-06	5.55713
TRAPPC13	-0.763996	5.02888	-5.55719	3.72322e-07	3.69794e-06	5.55701
SLC4A3	1.45515	2.95162	5.54913	3.84798e-07	3.80852e-06	5.55187
CDR2L	1.0347	4.70702	5.58166	3.368e-07	3.39527e-06	5.54971
C1orf122	-1.06253	4.55511	-5.52365	4.27039e-07	4.19352e-06	5.54658
HOXD11	1.50716	2.88028	5.54659	3.8883e-07	3.84609e-06	5.5432
PRKD1	-1.01781	5.46846	-5.56018	3.67786e-07	3.66684e-06	5.54277
EPAS1	1.34771	9.30362	5.54069	3.9832e-07	3.93043e-06	5.54114
DNAH2	2.25738	-1.73955	5.38349	7.54814e-07	6.92056e-06	5.53584
TM7SF3	-1.52301	7.40806	-5.58019	3.38846e-07	3.40957e-06	5.53266
LIPC	-2.11698	3.88262	-5.4341	6.14888e-07	5.77732e-06	5.50783
KHDRBS1	0.474058	7.39444	5.56304	3.63502e-07	3.63301e-06	5.50569
BAIAP2-AS1	0.77941	5.15651	5.57216	3.50173e-07	3.51488e-06	5.50299
RRAGD	-1.93388	6.64897	-5.5573	3.72146e-07	3.69794e-06	5.49869
MAP3K6	1.29673	4.42564	5.56732	3.57185e-07	3.57646e-06	5.49704
OXNAD1	-1.35444	4.32747	-5.48531	4.99315e-07	4.82198e-06	5.49652
PLXNA3	1.23986	3.99217	5.55724	3.72246e-07	3.69794e-06	5.48711
FUNDC2	0.859451	6.65614	5.56036	3.67514e-07	3.66638e-06	5.4803
LPCAT3	-0.795359	6.47877	-5.56563	3.59669e-07	3.59912e-06	5.47741
TUBB6	1.44718	5.51306	5.56333	3.63083e-07	3.63105e-06	5.4758
TNFRSF10D	1.39959	4.0502	5.55708	3.72492e-07	3.69794e-06	5.47334
CTSC	-1.23673	8.02837	-5.55999	3.68076e-07	3.6675e-06	5.46458
PPM1K	-1.91326	5.06805	-5.48739	4.95102e-07	4.78696e-06	5.45711
ZNF525	0.645789	3.27185	5.50653	4.57942e-07	4.46835e-06	5.43744
FNTB	0.383078	4.93942	5.54533	3.90826e-07	3.86349e-06	5.41962
KIAA0895	-0.805877	4.67907	-5.50662	4.57789e-07	4.46835e-06	5.41546
LASP1	0.765628	8.17274	5.52777	4.19915e-07	4.12604e-06	5.41168
COL6A2	2.56758	6.80748	5.52192	4.30074e-07	4.22078e-06	5.40005
PITX2	-3.60854	-0.884676	-5.30801	1.02329e-06	9.01877e-06	5.39961
CEP78	-0.839602	3.43969	-5.43694	6.07844e-07	5.72103e-06	5.38594
TM7SF2	-1.34077	5.2217	-5.49993	4.70445e-07	4.57296e-06	5.38029
MEX3C	0.88113	5.28358	5.54194	3.96281e-07	3.91268e-06	5.37871
TRMT1	0.553754	3.82008	5.50956	4.52315e-07	4.42574e-06	5.37592
PPA2	-0.98883	6.14892	-5.53209	4.12564e-07	4.06361e-06	5.36703
BAX	0.935567	4.31079	5.52811	4.19332e-07	4.1228e-06	5.36398
ABCC5	-1.2113	5.53851	-5.51172	4.48361e-07	4.38969e-06	5.36111
SPARC	2.43384	9.6613	5.47977	5.10712e-07	4.9233e-06	5.36034
SLC25A15	-1.33774	4.2337	-5.44724	5.82955e-07	5.52824e-06	5.35799
HSPG2	1.83544	8.71371	5.49452	4.80934e-07	4.66403e-06	5.3486
PCDHGB4	-1.30585	2.48864	-5.36579	8.10779e-07	7.33433e-06	5.347
FSD1L	-1.27218	2.5197	-5.36858	8.01675e-07	7.26855e-06	5.34278
CTNS	-0.925044	4.96533	-5.49451	4.80957e-07	4.66403e-06	5.33667
KIAA0319	1.97321	-1.83627	5.32181	9.68072e-07	8.58165e-06	5.33534
PCDHAC2	1.7775	1.22985	5.42214	6.45463e-07	6.04024e-06	5.32591
TMSB15B	1.29567	-0.331821	5.34262	8.90228e-07	7.9783e-06	5.32272
LINC00240	1.43468	-1.19419	5.32342	9.61805e-07	8.53537e-06	5.32206
RHBDF1	1.06277	4.11142	5.51495	4.42486e-07	4.33737e-06	5.31727
ALOX15B	3.18105	-3.47147	5.30462	1.03734e-06	9.1153e-06	5.31088
DERL3	1.96926	0.897772	5.40878	6.8139e-07	6.33646e-06	5.3058
ANKRD22	-4.01199	2.53496	-5.29457	1.0801e-06	9.4233e-06	5.28919
B3GAT3	0.774143	4.85322	5.51292	4.46161e-07	4.37077e-06	5.2765
PIK3R6	2.33014	-1.88669	5.31071	1.01227e-06	8.93942e-06	5.26718
AP1M2	-1.33046	6.31259	-5.50283	4.64907e-07	4.53264e-06	5.26078
RPS18	1.1383	9.4133	5.47053	5.30292e-07	5.08288e-06	5.25712
PSMC3IP	1.01777	1.04062	5.36567	8.11179e-07	7.33433e-06	5.25488
APPL2	-0.505498	5.60419	-5.50213	4.66246e-07	4.54297e-06	5.25409
TBL2	0.450073	5.11448	5.50678	4.5749e-07	4.46835e-06	5.2518
MPP5	-1.11454	6.79962	-5.50937	4.52682e-07	4.42668e-06	5.25161
PALM	-1.88533	6.06223	-5.48023	5.09765e-07	4.91708e-06	5.24891
MAML3	0.799128	4.15073	5.4902	4.89473e-07	4.73534e-06	5.23504
SHC1	0.786578	6.56441	5.50037	4.69601e-07	4.5702e-06	5.23488
GDAP1	-0.965379	3.8713	-5.41357	6.68297e-07	6.22535e-06	5.23067
CERCAM	1.50653	4.96345	5.5004	4.69546e-07	4.5702e-06	5.21617
RPL13	1.03928	9.01843	5.46243	5.48046e-07	5.23677e-06	5.20225
APLN	2.54411	4.19274	5.49267	4.84565e-07	4.69622e-06	5.19615
HOXC6	-1.16599	3.66379	-5.3846	7.51439e-07	6.90131e-06	5.19594
RPL18A	1.01215	5.65792	5.49467	4.80635e-07	4.66403e-06	5.19332
MEX3D	1.00957	3.19469	5.45325	5.68899e-07	5.417e-06	5.18846
EIF2B1	0.393404	5.37498	5.49219	4.85529e-07	4.70203e-06	5.18465
TMEM2	1.35914	5.94816	5.48672	4.96468e-07	4.79733e-06	5.17809
PEX3	-0.72466	4.90226	-5.45902	5.55714e-07	5.30694e-06	5.17737
LARS2	-0.99991	5.58968	-5.47049	5.30382e-07	5.08288e-06	5.16873
MYL4	2.30873	-3.0799	5.2602	1.23975e-06	1.06373e-05	5.16336
MFSD4B	-0.73784	3.06282	-5.36298	8.20029e-07	7.39795e-06	5.15261
PCDHB2	1.24112	1.70493	5.37922	7.67967e-07	7.00185e-06	5.1514
RNF122	0.978569	3.18593	5.44206	5.95352e-07	5.62293e-06	5.1489
ITPR3	2.02949	6.16947	5.47164	5.27894e-07	5.07096e-06	5.14834
TLE1	1.07246	4.83841	5.48271	5.04641e-07	4.87053e-06	5.14776
KTN1	-0.746407	8.28452	-5.47251	5.2604e-07	5.0591e-06	5.13682
AMACR	-2.55421	6.66541	-5.44954	5.77544e-07	5.4865e-06	5.13036
DDX25	-2.91385	0.980179	-5.24404	1.3226e-06	1.12535e-05	5.12575
UBE2J1	0.570742	6.55397	5.47451	5.21771e-07	5.02101e-06	5.12519
MEX3B	1.41006	0.567357	5.32572	9.52936e-07	8.46126e-06	5.12413
KLHL2	-0.650437	5.21752	-5.45689	5.60526e-07	5.34351e-06	5.11913
ECI2	-1.57474	7.11507	-5.47471	5.21341e-07	5.01983e-06	5.11759
C16orf71	-1.768	-0.00294124	-5.24143	1.33649e-06	1.13598e-05	5.11402
HMGN5	-0.897166	3.71387	-5.37935	7.67564e-07	7.00185e-06	5.11299
CNTNAP1	1.60275	2.05469	5.40084	7.03654e-07	6.52119e-06	5.10764
AGRN	1.4313	8.85845	5.43532	6.11853e-07	5.75213e-06	5.10294
MTMR10	-0.931114	7.32041	-5.47224	5.26609e-07	5.06159e-06	5.10158
PNPT1	-0.531621	4.83628	-5.44291	5.93287e-07	5.60883e-06	5.0987
PTEN	0.76103	6.83844	5.46267	5.47527e-07	5.23488e-06	5.09284
GALM	-2.3373	6.63261	-5.44584	5.86285e-07	5.5566e-06	5.09249
PRKAB1	-1.07997	7.06325	-5.46853	5.34621e-07	5.1205e-06	5.0842
EYA1	-4.1814	-1.54651	-5.22893	1.40494e-06	1.18797e-05	5.07998
PABPC3	0.789906	2.37952	5.37614	7.77586e-07	7.07374e-06	5.07744
CASK	0.576017	5.70018	5.46669	5.38629e-07	5.15283e-06	5.07641
CDH24	1.05166	1.85667	5.35938	8.32028e-07	7.49791e-06	5.06864
CCDC178	-2.62298	1.9158	-5.24653	1.30946e-06	1.11553e-05	5.0671
B3GALT6	0.674136	4.21776	5.44398	5.90732e-07	5.58899e-06	5.0529
MTRR	-0.626736	5.54635	-5.44826	5.80554e-07	5.50868e-06	5.05233
LDHA	1.65134	9.31583	5.41464	6.65394e-07	6.20895e-06	5.05134
LARP4	-1.09515	6.23696	-5.45188	5.72061e-07	5.44392e-06	5.04749
SLC25A51	-0.913806	3.64775	-5.35734	8.38901e-07	7.5515e-06	5.04596
HMGCS2	-6.21338	7.29747	-5.29859	1.06278e-06	9.29992e-06	5.04242
MRPL3	-0.521379	6.3366	-5.45646	5.61528e-07	5.34994e-06	5.03787
DPY19L2P4	-2.89846	-0.148225	-5.21211	1.50256e-06	1.25748e-05	5.03774
SAMD5	-2.79263	4.58742	-5.31519	9.94176e-07	8.79393e-06	5.0315
ZSCAN9	0.516766	2.61601	5.36521	8.1266e-07	7.34366e-06	5.03025
RPL29	0.966994	8.0974	5.43073	6.23377e-07	5.84698e-06	5.02978
JPH1	-2.22829	1.25409	-5.23039	1.39678e-06	1.18353e-05	5.02661
RALGDS	0.782748	5.02359	5.45145	5.73074e-07	5.45038e-06	5.02396
NUDT16P1	-1.01014	3.28542	-5.32775	9.45184e-07	8.40158e-06	5.02054
SLC17A5	-1.33024	6.00378	-5.43612	6.09887e-07	5.73695e-06	5.01958
ZNF230	0.684829	2.58344	5.36838	8.0235e-07	7.27063e-06	5.01717
RPL23	1.05616	8.5557	5.42034	6.50203e-07	6.08112e-06	5.01396
SCLY	-1.56912	4.14617	-5.34217	8.91842e-07	7.98837e-06	5.01079
PANK1	-2.26665	5.73887	-5.39078	7.32875e-07	6.75363e-06	5.00775
LINC00176	1.60839	-2.10974	5.22502	1.42705e-06	1.20354e-05	5.00446
LDHB	-1.09523	10.3927	-5.41787	6.56747e-07	6.13879e-06	5.00236
MAP4K3	-0.78901	6.01652	-5.44047	5.99202e-07	5.65274e-06	4.99804
MIPEP	-0.808758	5.40901	-5.42736	6.3194e-07	5.92049e-06	4.99731
SYPL2	-1.84026	4.534	-5.34628	8.77179e-07	7.87e-06	4.99651
ATG16L1	0.767796	4.72646	5.44086	5.98254e-07	5.64706e-06	4.99612
TYW5	-0.692519	3.35107	-5.33937	9.0197e-07	8.06581e-06	4.993
NELFA	0.726102	4.66066	5.43848	6.04076e-07	5.69214e-06	4.99243
SLC16A1	2.69859	4.40873	5.44002	6.00305e-07	5.65987e-06	4.9921
NAA60	-0.699181	6.42053	-5.44427	5.90029e-07	5.58558e-06	4.99128
ZNF408	0.548975	3.13458	5.38335	7.55233e-07	6.92056e-06	4.99126
ABHD18	-0.944387	2.88958	-5.30354	1.04187e-06	9.1448e-06	4.98992
COL4A4	-1.11007	6.73564	-5.44282	5.93516e-07	5.60883e-06	4.98815
SRPRB	-0.589763	5.92251	-5.43773	6.05911e-07	5.70613e-06	4.98176
ZNF25	0.577996	4.31041	5.42389	6.40911e-07	6.00109e-06	4.97289
DMGDH	-2.89406	6.89261	-5.40577	6.89752e-07	6.41056e-06	4.97157
GEMIN7	0.599356	3.19295	5.3826	7.57543e-07	6.93751e-06	4.97009
CSPG5	1.44056	-1.70868	5.22007	1.45555e-06	1.22394e-05	4.96806
TBC1D7	-1.42671	3.97382	-5.33007	9.36405e-07	8.34173e-06	4.96591
COL5A1	2.56096	4.70743	5.43196	6.20274e-07	5.82457e-06	4.96354
APOO	-1.33209	4.62181	-5.36403	8.1657e-07	7.37082e-06	4.95029
CACNA1E	-4.3053	0.272531	-5.18502	1.67387e-06	1.38521e-05	4.94548
PKMYT1	2.68513	-2.38909	5.22177	1.44572e-06	1.2174e-05	4.94271
FBXL16	1.98211	4.0563	5.42784	6.30706e-07	5.91232e-06	4.93756
RAB26	-2.58477	-1.04972	-5.18291	1.68802e-06	1.3948e-05	4.9365
BDKRB1	1.5854	1.16981	5.3077	1.02458e-06	9.02372e-06	4.90703
FAM71D	0.833101	-0.647498	5.21626	1.47787e-06	1.24063e-05	4.90669
MTA1	0.804775	4.50563	5.41502	6.64357e-07	6.20282e-06	4.90664
RPL36	1.09332	7.4701	5.40402	6.94635e-07	6.44493e-06	4.89926
FKBP1A	0.795853	7.57133	5.40423	6.94043e-07	6.4431e-06	4.89228
SCNN1G	-9.33994	7.05565	-5.18401	1.68059e-06	1.39007e-05	4.89184
RASL10A	2.21928	-2.72779	5.1928	1.62278e-06	1.34566e-05	4.88924
RPS11	0.863476	9.50395	5.37648	7.76498e-07	7.06778e-06	4.877
C1QTNF1	1.8944	4.84405	5.41374	6.67812e-07	6.22439e-06	4.87584
CDC42EP1	1.48275	5.66344	5.41101	6.75239e-07	6.28284e-06	4.8724
DBNDD2	1.38313	4.91878	5.41412	6.66801e-07	6.21852e-06	4.8714
PLA2G5	3.14979	-3.9296	5.18086	1.70181e-06	1.40477e-05	4.86844
RPL34	0.961766	8.12681	5.38897	7.38255e-07	6.79169e-06	4.86527
SULT1C2	-2.51946	5.75147	-5.34109	8.9572e-07	8.01871e-06	4.86144
AP1AR	-0.927105	5.03176	-5.37527	7.80309e-07	7.09455e-06	4.85423
ATE1	-0.938471	4.59484	-5.35601	8.4342e-07	7.58381e-06	4.85403
CPXM2	3.06947	5.26241	5.39627	7.16796e-07	6.61667e-06	4.85329
SLC35D1	-0.941448	5.3465	-5.38234	7.58337e-07	6.93751e-06	4.84021
MED21	-0.710792	5.44067	-5.38911	7.37862e-07	6.79169e-06	4.83349
ELK3	1.09111	4.76822	5.40273	6.98273e-07	6.475e-06	4.83165
GFM2	-0.903793	5.42057	-5.38233	7.58358e-07	6.93751e-06	4.82728
C2CD5	-0.623698	5.89073	-5.39731	7.13758e-07	6.59983e-06	4.82523
NME1-NME2	1.50471	0.645956	5.2562	1.25974e-06	1.07862e-05	4.82456
WSCD1	2.29195	5.14554	5.3952	7.19905e-07	6.64161e-06	4.82001
SUOX	-1.04111	6.32909	-5.39632	7.16643e-07	6.61667e-06	4.81831
PRPF38A	0.489542	5.36069	5.39996	7.06164e-07	6.53702e-06	4.81599
MTCH2	-1.14115	7.12699	-5.39682	7.15184e-07	6.60927e-06	4.79924
BRINP3	-6.7566	0.822387	-5.15095	1.91672e-06	1.55541e-05	4.7974
RPLP2	1.00746	8.22893	5.36929	7.99407e-07	7.25201e-06	4.79431
IFT88	-0.772475	5.03778	-5.36505	8.13215e-07	7.3446e-06	4.7923
TCF7L1	0.882717	4.53635	5.38703	7.44076e-07	6.84139e-06	4.78889
LRRC8C	1.06007	4.53148	5.38902	7.38109e-07	6.79169e-06	4.78879
DPY19L1	0.844623	4.93845	5.39145	7.30895e-07	6.73919e-06	4.78688
ERGIC1	0.844074	7.94775	5.37246	7.8924e-07	7.16377e-06	4.78649
FOXRED1	-1.20951	4.67516	-5.33069	9.34047e-07	8.32527e-06	4.78617
EPHX2	-2.15777	7.16054	-5.38441	7.52022e-07	6.90277e-06	4.78527
TATDN3	-0.90732	4.73814	-5.34501	8.81696e-07	7.90618e-06	4.78005
CPT1C	1.61381	0.807292	5.25767	1.25235e-06	1.07319e-05	4.77762
CNBP	0.423852	8.42208	5.36598	8.10153e-07	7.33318e-06	4.76583
SDS	2.92572	-1.81805	5.19442	1.61238e-06	1.33887e-05	4.76482
PELO	0.573386	5.23162	5.38614	7.46764e-07	6.86223e-06	4.76303
EIF2A	0.643207	6.60437	5.38202	7.59312e-07	6.93845e-06	4.76138
HACD3	-0.996439	7.95631	-5.38188	7.59747e-07	6.93854e-06	4.75831
ATP5B	-0.973388	10.3516	-5.35438	8.49003e-07	7.6298e-06	4.75423
RELL1	0.955459	4.44587	5.37668	7.75895e-07	7.06623e-06	4.75013
ZNF630	0.56221	1.55116	5.24039	1.34202e-06	1.14009e-05	4.74426
SHTN1	-0.68012	5.8019	-5.37387	7.84749e-07	7.13094e-06	4.74149
BLCAP	-0.691578	6.77084	-5.38218	7.58819e-07	6.93784e-06	4.74018
MGAT4A	-0.806847	7.21852	-5.38095	7.62614e-07	6.96083e-06	4.73892
CAPN13	-2.12266	1.66848	-5.16457	1.81573e-06	1.48751e-05	4.73677
ABCA17P	1.7575	-1.74369	5.16462	1.81538e-06	1.48751e-05	4.73493
SERAC1	-0.97778	3.91034	-5.289	1.10454e-06	9.62398e-06	4.73352
PRDX1	-0.73721	8.64068	-5.3662	8.09419e-07	7.33062e-06	4.72967
WDFY1	0.561425	6.08068	5.3773	7.73943e-07	7.05239e-06	4.72603
RNASEH2A	0.834733	2.9862	5.31914	9.785e-07	8.66467e-06	4.71682
ALOX12B	2.11341	-2.83836	5.14317	1.97681e-06	1.59623e-05	4.71345
DCAF17	-0.897842	4.75308	-5.3297	9.37785e-07	8.34722e-06	4.71314
ADORA3	2.01761	0.802925	5.25479	1.26688e-06	1.08416e-05	4.71297
GBA2	-1.0523	6.71515	-5.37366	7.85414e-07	7.13301e-06	4.71266
FASTKD1	-0.798296	4.25161	-5.30867	1.0206e-06	9.00323e-06	4.70799
BDH1	-1.97651	4.88359	-5.2781	1.15392e-06	9.9955e-06	4.68604
CPNE5	1.9864	1.16045	5.26115	1.23505e-06	1.06026e-05	4.68349
GTF2IP1	-0.690618	8.42122	-5.3562	8.42775e-07	7.58219e-06	4.6826
PCDHB16	1.23857	3.44922	5.3394	9.0186e-07	8.06581e-06	4.67768
KCNH3	-2.37166	1.25928	-5.13629	2.03152e-06	1.63152e-05	4.67705
ADAMDEC1	3.75435	-3.59105	5.14417	1.96898e-06	1.59147e-05	4.67554
CLDND1	0.717213	5.67478	5.36238	8.22e-07	7.41164e-06	4.66329
TDRD9	-4.84717	2.38342	-5.11756	2.18796e-06	1.73917e-05	4.66113
ASPA	-4.06886	3.96618	-5.15538	1.88326e-06	1.5338e-05	4.65426
LAMC1	1.21174	8.02185	5.33404	9.21531e-07	8.2227e-06	4.6536
LMNA	1.28079	7.83728	5.33514	9.17479e-07	8.19102e-06	4.65241
CUL4A	-0.385049	6.58612	-5.35904	8.33173e-07	7.50408e-06	4.64861
CTNNB1	0.415724	8.70992	5.33183	9.29798e-07	8.29193e-06	4.64459
KPTN	-1.21869	2.73512	-5.19696	1.5961e-06	1.32691e-05	4.63956
PTGIR	1.53729	1.95948	5.27276	1.17888e-06	1.0174e-05	4.62837
NDUFB3	-0.891782	5.70879	-5.33901	9.03285e-07	8.07314e-06	4.6261
ZNF654	0.672171	4.38658	5.33806	9.06725e-07	8.09945e-06	4.61863
FOXP2	-3.91301	1.85874	-5.1099	2.25534e-06	1.78664e-05	4.61843
COQ2	-0.791638	3.21147	-5.23018	1.39793e-06	1.18389e-05	4.61336
EVL	1.10961	4.787	5.34725	8.73757e-07	7.84362e-06	4.61155
C7orf25	-0.603437	4.22652	-5.28641	1.11609e-06	9.71942e-06	4.59253
RPL24	0.877076	8.31236	5.31831	9.81805e-07	8.68922e-06	4.59184
PRC1	1.24034	2.49518	5.2771	1.15853e-06	1.00302e-05	4.58025
SMYD4	0.445661	3.63541	5.29622	1.07295e-06	9.3742e-06	4.57185
PAIP2B	-1.3502	4.96777	-5.28187	1.13661e-06	9.87703e-06	4.56313
NINJ2	1.62621	-0.610091	5.14502	1.96231e-06	1.58766e-05	4.56045
GOLGA2P7	1.0598	3.24378	5.29621	1.073e-06	9.3742e-06	4.55022
TASP1	0.535313	3.20907	5.27398	1.17315e-06	1.01352e-05	4.54715
PLAUR	1.86378	2.79925	5.30105	1.05235e-06	9.21853e-06	4.54678
N6AMT1	-0.8425	3.86541	-5.24282	1.32907e-06	1.13027e-05	4.53994
TRHDE-AS1	-3.03479	2.73041	-5.11769	2.18683e-06	1.73912e-05	4.53649
SNIP1	0.594388	3.88955	5.30179	1.0492e-06	9.19587e-06	4.53623
ARHGAP17	0.629618	5.44687	5.32963	9.38045e-07	8.34722e-06	4.53435
IMMT	-0.86989	7.39191	-5.32821	9.43436e-07	8.39062e-06	4.53324
MED20	-0.586207	4.78245	-5.29534	1.07674e-06	9.4019e-06	4.53028
GIMAP6	0.960902	5.75231	5.32636	9.50476e-07	8.44401e-06	4.52653
ELMOD1	-4.28006	0.940241	-5.07415	2.59743e-06	2.01554e-05	4.52646
DDIT4	2.30489	6.77852	5.30345	1.04225e-06	9.1448e-06	4.52091
GGA2	-0.850574	7.11486	-5.32273	9.64483e-07	8.55448e-06	4.50691
VHL	-1.22567	4.787	-5.26277	1.22705e-06	1.05404e-05	4.50521
INPP5A	0.703058	5.12079	5.31978	9.75982e-07	8.64706e-06	4.50153
ANG	1.48754	3.42824	5.29764	1.06688e-06	9.33073e-06	4.49623
OSCAR	1.87608	-0.399316	5.14084	1.99518e-06	1.60708e-05	4.49157
HMGN3	-0.689118	6.1324	-5.31277	1.00393e-06	8.8754e-06	4.48142
RAB19	-2.41391	0.650891	-5.07517	2.58703e-06	2.00939e-05	4.48089
ZNF713	1.20942	1.46337	5.19433	1.61294e-06	1.33887e-05	4.4804
ALDH4A1	-4.14536	7.82175	-5.27176	1.18364e-06	1.02042e-05	4.47987
PIGT	0.502353	7.02746	5.30697	1.02761e-06	9.04067e-06	4.47517
ZBTB22	0.598178	4.94021	5.30941	1.01758e-06	8.98147e-06	4.47187
ZNF71	0.790689	2.72069	5.23987	1.34484e-06	1.14189e-05	4.47141
RNF26	0.553642	5.67766	5.31236	1.00557e-06	8.88508e-06	4.46508
NR5A2	1.67805	1.73656	5.22833	1.40833e-06	1.19022e-05	4.46506
LIX1	3.0822	3.91626	5.30186	1.04893e-06	9.19587e-06	4.45547
SPRED1	1.16641	5.85648	5.30547	1.03382e-06	9.09039e-06	4.45193
NDUFB2	-0.89686	6.62699	-5.30797	1.02347e-06	9.01877e-06	4.45179
SYCE2	1.85472	-3.17839	5.0618	2.72713e-06	2.10218e-05	4.43941
GPR21	1.91953	-1.7312	5.08964	2.44346e-06	1.91704e-05	4.43911
LYPLA1	-0.861943	6.66726	-5.30452	1.03777e-06	9.1153e-06	4.4367
OBSCN	1.40724	4.64121	5.2988	1.06192e-06	9.29734e-06	4.41946
NUDT5	-0.503507	4.96834	-5.27574	1.16489e-06	1.00745e-05	4.41795
TMEM133	1.24259	2.88294	5.25038	1.28947e-06	1.10003e-05	4.41506
ARAP3	1.0925	4.58571	5.29451	1.08035e-06	9.4233e-06	4.41225
EIF2AK1	-0.410525	7.51123	-5.29139	1.09398e-06	9.53706e-06	4.40349
ACSM3	-2.37	6.16058	-5.25187	1.28179e-06	1.09462e-05	4.40226
SALL3	3.6985	0.258483	5.20806	1.52704e-06	1.2756e-05	4.40171
IFI44	1.10524	3.45566	5.26608	1.2109e-06	1.04227e-05	4.39863
LCP2	1.38801	3.16613	5.26275	1.22716e-06	1.05404e-05	4.39855
RBM43	0.787903	4.36883	5.28133	1.13904e-06	9.8876e-06	4.38947
TMEM138	-0.688817	4.20157	-5.22755	1.41271e-06	1.1933e-05	4.38303
FER1L4	2.59268	-2.50143	5.06868	2.65413e-06	2.05173e-05	4.38029
IDS	0.749039	7.59822	5.27413	1.17242e-06	1.01343e-05	4.37893
GBP2	1.55092	5.41372	5.28572	1.11918e-06	9.73654e-06	4.37384
VWA8	-1.22711	6.11881	-5.2764	1.1618e-06	1.00531e-05	4.37198
PCSK6	1.88319	4.06367	5.28161	1.13777e-06	9.88188e-06	4.36199
RBMS2	0.834333	6.41149	5.28074	1.14175e-06	9.90586e-06	4.36177
AFTPH	-0.775857	6.86093	-5.2857	1.11925e-06	9.73654e-06	4.36003
GGN	1.49146	-1.7778	5.05972	2.74954e-06	2.11546e-05	4.35952
RAB31	1.37868	5.76267	5.27931	1.14831e-06	9.95218e-06	4.35258
UMOD	-13.4679	11.6152	-5.05059	2.85015e-06	2.18155e-05	4.35206
GIT1	0.744848	5.66466	5.2831	1.13097e-06	9.83333e-06	4.35135
ERC2	-2.02019	0.0766064	-5.03665	3.01084e-06	2.28524e-05	4.34905
TYMS	1.83556	3.00735	5.2532	1.27499e-06	1.08996e-05	4.34359
POLR1D	0.625352	5.78009	5.28004	1.14494e-06	9.92833e-06	4.33903
RASAL3	1.85569	1.11832	5.16767	1.79349e-06	1.47151e-05	4.33665
PIGH	-1.1273	5.10502	-5.23782	1.35593e-06	1.15011e-05	4.33106
SPRY1	1.61255	5.51576	5.27365	1.17467e-06	1.0143e-05	4.33048
MSL3P1	-2.00481	1.01009	-5.04424	2.92225e-06	2.22733e-05	4.32148
TBC1D24	-2.08994	4.83433	-5.17676	1.72979e-06	1.42355e-05	4.31888
ZNF622	0.533769	4.72338	5.26511	1.21558e-06	1.04575e-05	4.31504
GOLT1A	-1.82613	2.62033	-5.08831	2.45631e-06	1.92527e-05	4.3149
RFTN1	1.28203	5.22271	5.27185	1.18319e-06	1.02042e-05	4.30997
MBD2	0.483641	6.10736	5.27154	1.18465e-06	1.02075e-05	4.3085
H6PD	0.909457	6.61819	5.26365	1.22275e-06	1.05136e-05	4.30362
EFHC2	1.20156	2.09143	5.18328	1.68548e-06	1.3934e-05	4.30018
TMSB10	1.77535	8.15825	5.23481	1.37232e-06	1.1634e-05	4.29475
POLR3B	-1.06923	4.5008	-5.20338	1.5558e-06	1.29671e-05	4.29357
NUAK2	-2.67038	6.39391	-5.22141	1.44778e-06	1.21851e-05	4.2926
REXO4	0.59778	4.43018	5.25431	1.26935e-06	1.08571e-05	4.29192
PRIMA1	2.17954	1.98753	5.21447	1.48848e-06	1.2489e-05	4.29035
PHLPP2	-0.909131	4.21314	-5.19396	1.61535e-06	1.34018e-05	4.28801
APOL2	0.85631	5.46588	5.26639	1.20936e-06	1.04149e-05	4.28573
CLSPN	1.92277	-1.3006	5.05997	2.74681e-06	2.11436e-05	4.28539
LINC00908	1.67507	-0.302422	5.08321	2.50626e-06	1.95878e-05	4.28262
GRIN2C	1.6691	-1.28628	5.0527	2.82659e-06	2.16759e-05	4.27728
IFI44L	1.65377	4.19694	5.2576	1.25274e-06	1.07319e-05	4.26774
F7	-4.12302	-1.36237	-5.0022	3.44693e-06	2.5696e-05	4.26495
CFAP70	-2.63595	2.34029	-5.04476	2.91636e-06	2.22492e-05	4.26136
CPPED1	-0.629443	6.29934	-5.25875	1.24694e-06	1.06934e-05	4.26066
CHAC2	-1.41596	1.12731	-5.03928	2.97994e-06	2.2639e-05	4.25182
SPA17	-0.889421	3.28077	-5.13424	2.04809e-06	1.64402e-05	4.24561
TPBG	1.58293	4.13336	5.25066	1.28804e-06	1.09938e-05	4.24428
AUH	-1.25935	5.62296	-5.22985	1.39978e-06	1.18454e-05	4.24248
CD44	2.21909	6.23662	5.23828	1.35341e-06	1.14857e-05	4.23722
KLHDC8B	0.605811	4.78215	5.24649	1.3097e-06	1.11553e-05	4.23375
ETNK1	-0.739805	6.71971	-5.253	1.27601e-06	1.09026e-05	4.23225
IMPA1	-0.683106	4.77312	-5.21378	1.4926e-06	1.25171e-05	4.2255
WBP1L	0.572286	6.30493	5.24694	1.30735e-06	1.1147e-05	4.21906
ZNF773	0.710857	2.45836	5.15535	1.88351e-06	1.5338e-05	4.21067
NDUFS2	-0.856009	7.44295	-5.24521	1.31642e-06	1.12068e-05	4.20906
FRMPD1	-2.35542	0.498605	-4.9997	3.48082e-06	2.59131e-05	4.20752
CD83	-1.75668	5.11765	-5.17785	1.72235e-06	1.41957e-05	4.20306
CD180	2.13271	0.337869	5.10121	2.33421e-06	1.84018e-05	4.18536
SMIM11A	-0.663909	4.1749	-5.17585	1.73612e-06	1.42803e-05	4.18341
EPB41	-0.565276	5.62483	-5.22979	1.40016e-06	1.18454e-05	4.18067
FDX1	-1.03968	5.88234	-5.2245	1.43006e-06	1.20484e-05	4.17402
PHKG2	-0.736891	4.3564	-5.17839	1.71867e-06	1.41725e-05	4.17018
EXOSC9	0.48848	4.0265	5.20927	1.51967e-06	1.27049e-05	4.16823
GRK6	0.573422	3.93995	5.2074	1.53106e-06	1.2774e-05	4.1638
XPNPEP3	-1.14293	3.63302	-5.118	2.1842e-06	1.73788e-05	4.16334
PRRX2	2.42344	-1.26647	5.03935	2.97906e-06	2.2639e-05	4.1596
PAPPA	-2.86511	5.95571	-5.15659	1.87423e-06	1.52996e-05	4.15737
LRRC15	3.3114	-1.10355	5.07112	2.62867e-06	2.03688e-05	4.15261
MOCOS	-2.602	2.24418	-5.01516	3.27606e-06	2.46021e-05	4.15073
LOC644172	-1.54551	-0.0378618	-4.98647	3.66596e-06	2.71673e-05	4.14925
MICAL2	2.1159	4.9498	5.22622	1.42027e-06	1.19886e-05	4.14504
CCDC186	-1.1051	5.76661	-5.21257	1.49978e-06	1.25579e-05	4.14324
FKBP4	-0.731575	7.58939	-5.22613	1.42076e-06	1.19886e-05	4.14171
SCNN1B	-7.38162	6.16787	-4.99899	3.49058e-06	2.59621e-05	4.13892
SFTPD	1.38704	0.696225	5.07756	2.5628e-06	1.99246e-05	4.13776
LOC90768	-2.53286	0.0179214	-4.97239	3.8735e-06	2.85563e-05	4.13339
[truncated: 14,251 more rows]

## Sheet: RNA_CCPAPvsCCRCC
	logFC	AveExpr	t	P.Value	adj.P.Val	B
CASP14	12.8218	-6.0791	65.8546	1.07545e-258	1.75417e-254	575.166
LECT1	11.8076	-5.31907	56.8581	7.52549e-229	6.13741e-225	508.857
SALL3	9.15216	-5.54598	35.7476	7.40453e-144	4.02584e-140	315.802
GPR87	9.54367	-4.89443	35.0037	1.96433e-140	8.01004e-137	308.94
SLC1A6	9.3478	-5.09078	34.1792	1.32432e-136	4.32021e-133	300.064
SFTA2	8.359	-4.79397	31.1711	2.38227e-122	6.47619e-119	267.212
VGLL1	7.95316	-5.75424	29.8984	3.42161e-116	7.97284e-113	251.665
VWA2	6.32708	-2.4546	26.5331	1.30675e-99	2.66431e-96	215.918
MUC15	8.58045	-4.41045	25.7159	1.56678e-95	2.83952e-92	206.687
LINC00284	7.17024	-2.38645	24.0495	3.5594e-87	5.80574e-84	187.815
TFAP2B	8.12612	-3.98019	24.0021	6.16494e-87	9.14148e-84	187.112
SYT8	8.74608	-3.9137	23.847	3.71083e-86	5.04394e-83	185.468
SLC12A3	10.1836	-1.41455	23.0547	3.58454e-82	4.49749e-79	176.351
GABRA2	8.04714	-5.10515	23.014	5.73988e-82	6.68736e-79	175.229
TMPRSS4	8.40399	-2.6528	22.2701	3.16491e-78	3.44153e-75	167.431
VTCN1	8.61748	-1.16669	21.789	8.28406e-76	8.44508e-73	161.894
CRHR1	8.17868	-4.23837	21.4156	6.20635e-74	5.95481e-71	157.428
FXYD3	9.52076	-1.21667	20.9383	1.53271e-71	1.38889e-68	152.115
ABCA4	5.70513	-1.55513	20.9181	1.93454e-71	1.66075e-68	151.835
AGR2	8.81614	-4.30851	20.8024	7.34283e-71	5.98845e-68	150.521
NTSR1	6.54456	-1.65428	20.6592	3.8204e-70	2.96736e-67	148.944
INHA	7.66969	-1.08323	20.2335	5.11103e-68	3.78937e-65	144.113
GRHL2	7.69349	-2.79909	19.6799	2.91675e-65	2.06848e-62	137.779
KCNIP1	7.30371	-2.68396	19.2312	4.9028e-63	3.33207e-60	132.684
EHF	7.37893	-1.39086	19.1898	7.85814e-63	5.12696e-60	132.258
GRHL3	6.43621	-2.75645	18.9775	8.80628e-62	5.52459e-59	129.711
DUOX2	6.02917	-2.55918	18.7979	6.78198e-61	4.09707e-58	127.662
RAB25	8.33575	-2.3712	18.7155	1.72574e-60	1.0053e-57	126.902
ACKR2	4.27247	-0.25397	18.6427	3.93981e-60	2.21594e-57	126.02
TGM5	7.11586	-4.41348	18.5914	7.04103e-60	3.82821e-57	125.06
MYO3B	6.70066	-1.30663	18.5127	1.7165e-59	9.03155e-57	124.621
LHX1	7.56807	-4.21469	18.414	5.24055e-59	2.67121e-56	123.305
SLC30A10	7.54279	-4.4912	18.2411	3.69196e-58	1.82483e-55	121.293
PRSS22	7.11643	-4.5798	18.1286	1.3113e-57	6.29076e-55	119.853
LEFTY1	6.86029	-0.920059	17.9692	7.87681e-57	3.67082e-54	118.542
KCNJ1	7.58136	-0.338778	17.5106	1.3411e-54	5.91206e-52	113.438
KRT17	8.62324	0.293929	17.5108	1.33803e-54	5.91206e-52	113.42
KRT23	6.54934	-3.54846	17.4405	2.93445e-54	1.25957e-51	112.435
GPM6B	4.33671	0.910342	17.3432	8.67547e-54	3.62835e-51	111.588
COL17A1	6.17919	-1.34665	17.2786	1.77952e-53	7.25646e-51	110.866
NECTIN4	5.87896	-1.04098	16.972	5.3442e-52	2.12608e-49	107.491
ADGRF1	7.76214	-2.29625	16.7182	8.81874e-51	3.42482e-48	104.714
GGT6	6.94138	-1.78309	16.7155	9.07937e-51	3.44404e-48	104.684
CDH3	6.10624	0.407078	16.4734	1.29944e-49	4.81708e-47	102.046
TGM1	6.18298	-0.282457	16.0817	9.38228e-48	3.40076e-45	97.7986
GABRP	6.06043	-1.04941	16.0166	1.90383e-47	6.75075e-45	97.0961
NR0B1	6.76224	-5.49093	15.9118	5.93704e-47	2.0604e-44	95.3002
ESRP1	7.7904	-1.9208	15.8423	1.26059e-46	4.28364e-44	95.2209
SERPINA4	7.00247	-2.98837	15.4762	6.52515e-45	2.17208e-42	91.2917
OVOL2	6.5171	-4.62112	15.2377	8.36898e-44	2.73013e-41	88.416
DUOX1	4.57359	0.0695891	15.0423	6.70072e-43	2.14305e-40	86.7135
KRT81	4.83256	-1.29301	15.0336	7.34318e-43	2.30336e-40	86.5978
UCA1	6.34807	-5.07724	14.9751	1.36543e-42	4.20218e-40	85.4863
MFSD6L	5.57259	-2.87712	14.9309	2.1826e-42	6.59266e-40	85.4131
GRIA2	6.50042	-4.87779	14.6813	3.03368e-41	8.9968e-39	82.5551
CLDN16	5.85565	-2.68695	14.3415	1.0609e-39	3.09005e-37	79.3734
ECEL1	6.14734	-2.71489	14.0803	1.58984e-38	4.54944e-36	76.7181
TMEM52B	5.35639	0.698099	13.9477	6.23362e-38	1.75305e-35	75.3573
STAC2	10.1116	-0.266011	13.8748	1.31729e-37	3.64174e-35	74.6399
KCNK15	5.96089	-2.45868	13.8495	1.70732e-37	4.64136e-35	74.3759
PROM2	7.23857	0.988388	13.8156	2.4171e-37	6.46317e-35	74.0291
TMEM61	6.44214	-3.11907	13.803	2.74794e-37	7.2293e-35	73.8943
SUSD4	5.09798	0.368064	13.6241	1.70356e-36	4.41059e-34	72.0809
C1orf116	6.18114	0.226958	13.4986	6.08613e-36	1.55111e-33	70.8163
PLEKHS1	5.7489	-2.46252	13.3415	2.97147e-35	7.45657e-33	69.272
TFAP2A	5.5671	0.205039	13.2413	8.1302e-35	2.00927e-32	68.2467
RASGRF1	4.05234	-0.916642	13.0141	7.85703e-34	1.91278e-31	66.0341
PKP3	6.22287	-1.16082	12.9011	2.41139e-33	5.78414e-31	64.9012
RNF39	3.36875	-1.56977	12.8902	2.68466e-33	6.3463e-31	64.6964
FAM167A	4.22214	0.708648	12.686	2.00849e-32	4.68008e-30	62.7976
PRR15L	6.52314	0.319998	12.6276	3.55947e-32	8.17727e-30	62.2223
GALNT3	4.35981	1.86838	12.6153	4.01499e-32	9.09562e-30	62.0946
ATP6V0A4	7.03831	-2.43732	12.5556	7.19204e-32	1.60698e-29	61.5534
FOXA3	5.71369	-3.33	12.5171	1.04711e-31	2.30802e-29	61.1601
ERBB4	5.53991	-0.551701	12.4409	2.19579e-31	4.7754e-29	60.4311
KCNS1	6.48273	-2.186	12.394	3.46095e-31	7.42784e-29	60.0072
LIX1	7.07765	-0.167734	12.1811	2.69612e-30	5.71122e-28	57.9382
SCN5A	4.2405	-2.20115	12.1475	3.7238e-30	7.78703e-28	57.6208
FAM83B	6.36727	-3.96355	12.0825	6.93135e-30	1.4311e-27	57.0362
BCL2L15	4.06287	-0.627195	12.0318	1.12493e-29	2.2936e-27	56.5896
FUT2	3.4708	-1.23562	11.9528	2.38548e-29	4.80366e-27	55.8172
TMEM30B	4.7319	1.90426	11.912	3.51287e-29	6.98762e-27	55.3865
CST6	4.88498	-2.7886	11.8951	4.12375e-29	8.10392e-27	55.2638
SLC26A10	4.44639	-0.393216	11.8376	7.10144e-29	1.37895e-26	54.7456
IL17RE	3.22416	1.51094	11.8272	7.83797e-29	1.50406e-26	54.6132
GRIK5	5.16936	-1.2944	11.82	8.38362e-29	1.59006e-26	54.5911
B4GALNT1	6.08721	1.76948	11.8082	9.37269e-29	1.75722e-26	54.4361
NUPR2	6.20811	-5.2174	11.755	1.54749e-28	2.86831e-26	53.8146
FAM3B	5.17239	-1.94903	11.6336	4.83047e-28	8.85278e-26	52.8851
CNGA1	4.24562	-0.219811	11.5999	6.61903e-28	1.19959e-25	52.539
TCEAL2	5.48176	-2.12888	11.5223	1.36378e-27	2.44446e-25	51.8586
MAP3K15	5.68699	-2.69676	11.5065	1.57982e-27	2.80091e-25	51.7187
B4GALNT4	5.87199	-1.34423	11.4361	3.03503e-27	5.32305e-25	51.0155
TRIM29	5.15925	-0.501487	11.3662	5.79019e-27	1.00472e-24	50.3693
LYPD6B	5.61228	-3.06569	11.2983	1.08168e-26	1.85718e-24	49.8182
S100A2	4.06078	1.24505	11.2268	2.08498e-26	3.54251e-24	49.0724
TMEM213	6.34906	-2.30821	11.2039	2.57137e-26	4.32388e-24	48.9306
AGR3	5.72852	-5.37727	11.069	8.78888e-26	1.46281e-23	47.5324
DAPK2	3.75219	2.16946	11.0555	9.93645e-26	1.63711e-23	47.515
SVOPL	5.87894	-4.42646	11.0406	1.13653e-25	1.8538e-23	47.4348
PRRG2	3.60781	-0.550599	11.0323	1.22545e-25	1.97904e-23	47.4307
HOXB9	4.70152	1.23442	10.9835	1.90671e-25	3.04905e-23	46.8731
CTNND2	4.85703	-2.98001	10.9315	3.04637e-25	4.8242e-23	46.5082
L1CAM	5.85233	0.996359	10.8968	4.16257e-25	6.52843e-23	46.1084
NWD1	4.42882	-0.548577	10.8189	8.37731e-25	1.30136e-22	45.4925
SCEL	5.70473	-4.91699	10.7837	1.14681e-24	1.76469e-22	45.1013
POU2F3	4.31754	-2.43346	10.6765	2.97992e-24	4.54256e-22	44.2784
TMPRSS3	5.91101	1.44246	10.6378	4.1989e-24	6.3415e-22	43.8315
ALDH1A2	5.86395	2.20065	10.6274	4.60465e-24	6.8905e-22	43.7559
ATP13A4	4.80052	-0.41756	10.6022	5.75465e-24	8.53311e-22	43.5551
KLHL14	3.65292	0.00762867	10.5695	7.68009e-24	1.12856e-21	43.3192
SLC15A2	3.38533	1.27706	10.5029	1.37993e-23	2.00964e-21	42.6714
GPRC5A	5.46922	1.50884	10.4544	2.1121e-23	3.04872e-21	42.2255
FKBP1B	2.59981	1.22336	10.3961	3.51454e-23	5.02857e-21	41.8034
PPP1R1B	5.46156	-3.84368	10.2701	1.05111e-22	1.49083e-20	40.7759
MAPK4	5.61072	-3.09146	10.2648	1.10072e-22	1.54774e-20	40.7522
TMEM45B	4.33798	0.328702	10.2554	1.19402e-22	1.66459e-20	40.5434
EPN3	5.47856	-2.79589	10.213	1.72114e-22	2.37911e-20	40.3113
PAK6	3.9983	-0.831935	10.1995	1.93382e-22	2.65063e-20	40.1749
LRP1B	5.10887	-3.30064	10.1829	2.23177e-22	3.03353e-20	40.0483
HOMER2	3.63504	0.657832	10.1186	3.87631e-22	5.22533e-20	39.401
ETV4	4.13112	-1.38902	9.97361	1.33596e-21	1.7728e-19	38.294
TSPAN8	5.35292	-1.03777	9.97353	1.33686e-21	1.7728e-19	38.1864
TMPRSS13	3.46641	-1.14614	9.94999	1.63239e-21	2.13007e-19	38.1068
SHISA3	5.14721	2.00692	9.96303	1.46153e-21	1.9225e-19	38.0424
PPP1R36	4.53235	-2.4538	9.71712	1.1575e-20	1.49842e-18	36.1881
NIPAL1	3.89052	-1.25315	9.67718	1.61451e-20	2.04142e-18	35.8476
NDNF	6.42838	0.343993	9.69314	1.41363e-20	1.81556e-18	35.8005
EPS8L1	4.36614	1.34511	9.68354	1.53132e-20	1.95135e-18	35.7128
TDGF1	5.39279	-3.1803	9.65528	1.93692e-20	2.43024e-18	35.6836
COL26A1	4.92215	-3.43896	9.62277	2.53689e-20	3.13479e-18	35.4072
KCTD1	2.74537	3.46538	9.6396	2.20628e-20	2.74707e-18	35.3435
SLC16A5	2.86011	2.20802	9.59973	3.07022e-20	3.76529e-18	35.039
TP53AIP1	4.28433	-3.552	9.54282	4.91225e-20	5.97938e-18	34.7261
PLCD1	1.8383	3.57642	9.53684	5.15999e-20	6.23441e-18	34.5109
BCAS1	4.99165	-2.04098	9.48163	8.12443e-20	9.74394e-18	34.2535
HOXB8	3.89064	2.00224	9.4709	8.8718e-20	1.05626e-17	33.9742
OLFM4	5.13424	-3.6826	9.44051	1.13789e-19	1.34494e-17	33.9445
WDR86	3.96544	-1.23842	9.37382	1.96083e-19	2.30094e-17	33.3956
TACSTD2	6.27454	3.37561	9.36445	2.11614e-19	2.46546e-17	33.1978
KRT7	6.81956	2.53719	9.33804	2.62287e-19	3.03416e-17	32.9802
TRPV6	4.0617	-3.08228	9.3169	3.11342e-19	3.55126e-17	32.945
PITPNM3	2.4858	1.20361	9.32114	3.00823e-19	3.45544e-17	32.8885
GJB3	4.53893	-2.52318	9.23425	6.07132e-19	6.87704e-17	32.313
CAPN8	4.83365	-4.48211	9.16919	1.02407e-18	1.15197e-16	31.7461
LYPD6	3.78666	-1.81038	9.09695	1.82425e-18	2.03804e-16	31.2376
KLF5	3.45841	3.36282	9.01158	3.5942e-18	3.98809e-16	30.3273
PDE8B	3.0549	1.76905	8.99389	4.13404e-18	4.5561e-16	30.2149
POF1B	4.97824	0.0846235	8.88893	9.44646e-18	1.0341e-15	29.3969
HOXB6	2.84156	3.11819	8.87656	1.04079e-17	1.13176e-15	29.2709
ADGRG2	4.36675	1.05419	8.84835	1.29772e-17	1.40179e-15	29.0678
EPHX3	3.07137	0.619346	8.78159	2.1834e-17	2.34299e-15	28.6766
CKMT1A	5.88169	-3.19812	8.74271	2.95216e-17	3.14723e-15	28.4883
STAC	3.28511	0.688244	8.73765	3.07009e-17	3.25171e-15	28.3107
SRGAP3	2.31815	2.02077	8.72194	3.46697e-17	3.64837e-15	28.1551
SERPINA5	4.79488	1.04502	8.69891	4.14236e-17	4.33116e-15	27.9191
RIMS4	4.54608	-3.55877	8.62333	7.40953e-17	7.55356e-15	27.6223
PTGFR	3.83742	1.01299	8.63621	6.71202e-17	6.97324e-15	27.4725
NR2F1-AS1	2.5635	2.01671	8.63338	6.85942e-17	7.08127e-15	27.4633
PROSER2	2.73728	3.03524	8.63197	6.93399e-17	7.11323e-15	27.4039
LRRN2	3.77635	1.11523	8.60792	8.33834e-17	8.44762e-15	27.259
TJP3	4.58083	-1.44931	8.58171	1.01899e-16	1.02597e-14	27.2335
LMTK3	3.7958	-0.0459835	8.57759	1.05151e-16	1.05222e-14	27.1325
ANKS1A	2.68913	5.5508	8.55855	1.21601e-16	1.20941e-14	26.8992
SLC6A20	5.26993	-0.399261	8.52733	1.54249e-16	1.52483e-14	26.6626
KLK6	5.15938	-4.61745	8.49493	1.97294e-16	1.93859e-14	26.6601
SOSTDC1	4.58758	-0.274322	8.47687	2.26227e-16	2.20957e-14	26.3202
COL4A6	3.89899	-2.12817	8.4454	2.87035e-16	2.75401e-14	26.3036
ODAM	4.28308	-6.05896	8.45658	2.63779e-16	2.54585e-14	26.1621
GATA3	3.15739	2.11152	8.46117	2.54778e-16	2.47362e-14	26.1389
CKMT1B	5.27718	-1.65265	8.42943	3.23801e-16	3.0886e-14	26.0496
TPTEP1	3.17948	0.7671	8.38615	4.48495e-16	4.25314e-14	25.6783
LIPH	4.67415	-1.39305	8.36277	5.34534e-16	5.01079e-14	25.5913
PDLIM4	3.86404	2.4847	8.36891	5.10493e-16	4.81309e-14	25.4404
CNTN1	5.21315	-2.1651	8.31129	7.85641e-16	7.32262e-14	25.2402
KLC3	3.67011	-1.05131	8.29464	8.89508e-16	8.24361e-14	25.1545
RNF182	3.58967	0.116041	8.27853	1.00295e-15	9.24242e-14	24.9169
SCD	-4.26808	8.71084	-8.26915	1.07536e-15	9.79904e-14	24.7565
VNN2	3.01567	2.61777	8.27378	1.039e-15	9.52083e-14	24.7423
LHX9	4.79276	-5.49482	8.24114	1.32406e-15	1.19319e-13	24.7391
HOXD11	3.17941	1.13125	8.25945	1.15583e-15	1.04737e-13	24.7117
MRAP2	3.878	-2.03478	8.20614	1.71581e-15	1.52932e-13	24.5577
SLPI	6.62265	0.976254	8.23342	1.40205e-15	1.25653e-13	24.4783
RNF150	3.05433	0.824442	8.19844	1.81619e-15	1.60999e-13	24.3086
EWSAT1	3.62722	-1.95199	8.13541	2.88946e-15	2.54757e-13	24.055
GMPR	2.75911	2.37895	8.09141	3.98929e-15	3.49835e-13	23.4353
SLC4A3	4.21463	0.128613	8.07853	4.38327e-15	3.82329e-13	23.4062
MREG	2.11792	2.57677	8.07605	4.46332e-15	3.8724e-13	23.3487
SFN	3.97816	0.930225	8.04206	5.71894e-15	4.93553e-13	23.1021
TFCP2L1	5.28065	2.44006	8.01099	7.16851e-15	6.15397e-13	22.8745
LINC00092	2.867	-1.39044	7.92675	1.31823e-14	1.12574e-12	22.5837
ESPNP	4.10652	-2.67224	7.91197	1.46617e-14	1.23911e-12	22.482
TMCO4	2.16788	4.98332	7.91871	1.3968e-14	1.18662e-12	22.1982
SLC9A3R1	-2.63358	7.57274	-7.89662	1.63724e-14	1.37654e-12	22.0485
TYRP1	4.64356	-4.45518	7.84556	2.36035e-14	1.97434e-12	22.0205
KRT15	4.91496	-2.98173	7.83701	2.50897e-14	2.08795e-12	21.9434
TFAP2C	4.54031	-2.56584	7.82872	2.66191e-14	2.20398e-12	21.8802
BDKRB1	3.75287	-1.0519	7.82767	2.6818e-14	2.20924e-12	21.8157
LRRC2	3.80645	-0.738982	7.81784	2.87667e-14	2.35785e-12	21.705
TRIM17	3.55504	-1.9537	7.79248	3.4456e-14	2.81006e-12	21.6451
SLC29A2	3.33872	0.544883	7.78559	3.61866e-14	2.93652e-12	21.3769
HOXB5	2.36578	1.51336	7.75847	4.38638e-14	3.54189e-12	21.1877
MST1R	2.72801	-0.0813651	7.7275	5.46072e-14	4.34487e-12	21.1189
KLK7	4.52457	-5.12102	7.71082	6.14276e-14	4.86381e-12	21.0675
OVOL1	3.60671	0.360226	7.73963	5.01201e-14	4.02714e-12	21.0482
NAALADL2	2.10994	1.52738	7.72801	5.44103e-14	4.34487e-12	20.9976
VWA5B1	4.5778	-4.46947	7.6623	8.64182e-14	6.77677e-12	20.7679
ARTN	3.26565	-1.14889	7.65672	8.98715e-14	7.01385e-12	20.6855
ARL4D	2.83331	2.21721	7.66357	8.56556e-14	6.74941e-12	20.4286
PRDM16	3.068	0.712252	7.64397	9.82729e-14	7.633e-12	20.4079
CRABP2	3.74254	0.583407	7.56907	1.65741e-13	1.27519e-11	19.8428
TNFRSF10C	2.26851	2.44357	7.5699	1.64781e-13	1.27381e-11	19.8046
TOX3	4.67721	0.942932	7.55854	1.78319e-13	1.36552e-11	19.6939
TMEM178A	2.84248	0.695914	7.50401	2.60129e-13	1.98269e-11	19.4926
COX4I2	3.57138	2.9452	7.46594	3.38163e-13	2.56548e-11	19.0583
PRKCQ	2.48642	2.64341	7.43844	4.08458e-13	3.08443e-11	18.8878
SMIM10L2B	2.28942	1.12398	7.39707	5.42118e-13	4.03767e-11	18.7834
TESC	3.25469	2.79573	7.4176	4.71142e-13	3.54138e-11	18.7296
XK	3.61349	-0.754203	7.37761	6.19076e-13	4.58989e-11	18.7281
SCARA3	3.96767	3.89589	7.40108	5.27495e-13	3.94678e-11	18.6602
PCP4	5.188	-3.23423	7.32245	9.006e-13	6.64691e-11	18.4577
WNK2	4.07229	-1.34002	7.30358	1.02326e-12	7.51823e-11	18.2609
FREM1	4.05167	-0.00277055	7.23029	1.67621e-12	1.22604e-10	17.5974
FLNB	2.81682	8.23343	7.18389	2.28638e-12	1.66487e-10	17.335
GABRG1	4.51967	-3.10629	7.14234	3.01503e-12	2.15694e-10	17.3114
DIRAS3	2.66451	0.552352	7.1614	2.65615e-12	1.91701e-10	17.2598
CLDN19	4.34141	-1.09966	7.15444	2.78212e-12	1.99908e-10	17.2173
LAMC2	4.81492	2.83635	7.17635	2.40437e-12	1.743e-10	17.1682
HRG	4.71288	-4.27442	7.10875	3.76729e-12	2.67166e-10	17.1303
CTXN1	3.03096	0.677027	7.12839	3.30773e-12	2.356e-10	16.983
EPHX4	2.65206	-0.147958	7.06027	5.18811e-12	3.63875e-10	16.6926
CDH23	2.99325	1.91795	7.09957	4.00321e-12	2.82668e-10	16.6665
LCN12	2.92177	0.233425	7.05635	5.32363e-12	3.71085e-10	16.5943
FMN1	2.82503	0.540458	7.05998	5.19789e-12	3.63875e-10	16.5702
TMC4	4.00281	2.87258	7.04484	5.74222e-12	3.98559e-10	16.2902
C14orf132	3.40133	2.66125	7.03987	5.93277e-12	4.1004e-10	16.2481
MIR31HG	4.24658	-2.03101	6.98352	8.57959e-12	5.8553e-10	16.2399
KDF1	2.85073	1.17511	7.00071	7.66827e-12	5.25534e-10	16.1128
HSPA2	2.74934	3.92149	7.01646	6.91745e-12	4.76078e-10	16.101
RBM11	4.01685	-2.72861	6.93738	1.15848e-11	7.87331e-10	16.0174
GATA3-AS1	3.7666	-4.61281	6.8718	1.77043e-11	1.1835e-09	15.6353
FGF9	4.66884	-2.89239	6.88066	1.67214e-11	1.1224e-09	15.6332
PDE4C	3.01085	1.01651	6.92358	1.26693e-11	8.57464e-10	15.6228
MAGED4B	3.85505	0.615104	6.91205	1.36522e-11	9.20168e-10	15.5062
C15orf56	3.87297	-3.76553	6.81394	2.5669e-11	1.68825e-09	15.2869
ZNF853	2.1764	2.20976	6.86006	1.90932e-11	1.27114e-09	15.1758
LAD1	4.12096	2.07777	6.84862	2.05515e-11	1.36267e-09	15.0352
LIPG	2.949	2.34477	6.84137	2.15302e-11	1.42178e-09	14.9998
FOLR3	3.99975	-3.70724	6.75471	3.74475e-11	2.42383e-09	14.9216
SLC7A1	3.2018	5.89566	6.80968	2.63773e-11	1.72787e-09	14.8757
SYT1	2.96634	-1.02123	6.74116	4.08115e-11	2.62078e-09	14.7501
FKBP9P1	2.3677	2.03752	6.75497	3.73874e-11	2.42383e-09	14.5183
TGFB2	2.26724	3.32876	6.76266	3.56017e-11	2.3228e-09	14.4967
SH2D3A	1.96968	2.50035	6.75147	3.82277e-11	2.46455e-09	14.4923
FAM198A	2.50008	-0.605477	6.66945	6.41989e-11	4.0275e-09	14.3139
LAMB3	4.75632	3.71295	6.71047	4.95679e-11	3.1706e-09	14.2372
RHOV	3.33197	-0.000323978	6.68475	5.83018e-11	3.71469e-09	14.2336
LETM2	1.74751	1.34502	6.67408	6.23527e-11	3.92678e-09	14.193
ZNF613	1.01509	2.56184	6.67971	6.01817e-11	3.81955e-09	14.1534
CHD5	3.85136	-3.34063	6.62263	8.61104e-11	5.30018e-09	14.1154
TRNP1	3.0961	1.09521	6.67847	6.06558e-11	3.83471e-09	14.0787
FGF1	2.48175	2.32146	6.66336	6.67026e-11	4.16853e-09	13.9205
B4GALNT3	2.93109	0.414055	6.63443	7.99793e-11	4.96024e-09	13.9182
ANXA3	3.8362	2.04271	6.64787	7.35188e-11	4.57696e-09	13.7896
BSPRY	3.29096	1.50183	6.62789	8.33228e-11	5.14802e-09	13.7084
CD47	1.49909	6.52622	6.58699	1.07554e-10	6.59514e-09	13.4636
PRKX	2.12703	5.16913	6.54577	1.38935e-10	8.48754e-09	13.1861
MAGEL2	3.81489	-3.40792	6.46473	2.28957e-10	1.36296e-08	13.1776
NMU	4.71609	-3.74362	6.46114	2.3406e-10	1.38827e-08	13.1326
RNF43	2.54407	1.67178	6.51759	1.65394e-10	1.00662e-08	13.0879
ITM2C	2.83816	6.95499	6.51158	1.71641e-10	1.04075e-08	13.0737
LCN2	4.49658	-2.3438	6.45944	2.36509e-10	1.39772e-08	13.033
LRRN4	3.62376	0.979906	6.50357	1.8033e-10	1.08939e-08	12.9742
SYTL1	2.55142	1.62866	6.49703	1.87739e-10	1.12997e-08	12.9728
SERPINA3	5.17347	2.51558	6.48698	1.99725e-10	1.19769e-08	12.8459
BDKRB2	3.95905	3.75294	6.48156	2.0648e-10	1.23366e-08	12.815
SLC9A2	4.33993	-2.18523	6.38592	3.70365e-10	2.14983e-08	12.594
SYNE4	3.74341	-2.4027	6.36422	4.22455e-10	2.4435e-08	12.5404
ATP8B1	2.26625	4.6344	6.43917	2.67751e-10	1.57664e-08	12.5341
SCNN1A	5.03217	3.65637	6.41679	3.06948e-10	1.80095e-08	12.466
ZNF350	1.40861	3.62335	6.4144	3.11447e-10	1.82079e-08	12.3988
POMGNT2	1.2086	3.99775	6.40457	3.30667e-10	1.92625e-08	12.3316
ZNF713	1.69291	0.823147	6.33398	5.07171e-10	2.92313e-08	12.2357
FAM83G	2.80265	0.315938	6.3275	5.2736e-10	3.01817e-08	12.1121
SIM1	4.39905	-0.173588	6.33079	5.17013e-10	2.96937e-08	11.9824
C6orf132	2.61313	0.391305	6.29339	6.47423e-10	3.66671e-08	11.9372
SPTBN2	3.84527	1.06169	6.31725	5.60952e-10	3.19919e-08	11.8483
MBOAT2	1.70405	3.22525	6.30343	6.09561e-10	3.4643e-08	11.7506
SPTSSB	3.24801	-3.29496	6.21106	1.05822e-09	5.85105e-08	11.7258
HR	2.96352	0.081051	6.24857	8.46566e-10	4.74513e-08	11.6685
ZNF98	3.10893	-2.88055	6.19929	1.13479e-09	6.25321e-08	11.6469
CAPS	2.26002	2.19663	6.26612	7.62326e-10	4.28769e-08	11.5783
ARHGEF38	3.60721	-3.08233	6.18905	1.20571e-09	6.62168e-08	11.5752
B3GNT8	2.13186	0.814524	6.22784	9.57789e-10	5.33191e-08	11.5623
LAMA3	2.70507	4.22576	6.27032	7.43386e-10	4.19563e-08	11.54
NAP1L6	4.07388	-4.15802	6.16835	1.36263e-09	7.43337e-08	11.4856
RASSF9	2.45588	0.322067	6.18271	1.25178e-09	6.85159e-08	11.3237
HOXD10	2.42544	2.89424	6.23033	9.43754e-10	5.27177e-08	11.3085
SCD5	4.43012	4.33298	6.21774	1.01707e-09	5.64267e-08	11.3043
MESP1	2.10936	0.546586	6.16287	1.40742e-09	7.65214e-08	11.2346
PVALB	4.9386	-3.03516	6.14029	1.6076e-09	8.65399e-08	11.2125
MATN3	2.61762	0.428901	6.15016	1.51683e-09	8.19241e-08	11.1062
HIGD1A	2.57403	5.83463	6.15143	1.50559e-09	8.1587e-08	10.9067
LINC00473	4.04187	-2.72199	6.05779	2.60439e-09	1.39279e-07	10.7894
SCN2B	3.74029	-2.94991	6.00881	3.45918e-09	1.83787e-07	10.5505
ZNF649	1.5094	3.16069	6.0801	2.28695e-09	1.22706e-07	10.4803
BIK	2.88875	-2.12731	5.97018	4.32161e-09	2.26655e-07	10.3395
ABCA13	3.58895	-3.749	5.95573	4.69528e-09	2.44679e-07	10.3062
FAM131B	1.72776	0.963386	5.99685	3.7065e-09	1.95653e-07	10.2845
ANKRD34B	3.41091	-4.75321	5.94743	4.92407e-09	2.52647e-07	10.2787
NTNG1	4.09715	-3.4552	5.95445	4.72991e-09	2.45699e-07	10.263
TMEM207	3.0764	-5.98598	5.94737	4.92562e-09	2.52647e-07	10.2414
SLC7A10	3.68063	-4.26198	5.93167	5.38852e-09	2.74663e-07	10.1863
ATP1A1	2.00989	9.44525	6.00271	3.58325e-09	1.89761e-07	10.1816
IGSF9	3.31834	-2.35102	5.9384	5.18517e-09	2.65127e-07	10.1521
FAM110B	1.94588	3.425	6.01859	3.26907e-09	1.74254e-07	10.0957
GRID2IP	2.42319	-2.4208	5.89946	6.47509e-09	3.25973e-07	9.98991
ROBO2	2.81131	0.435465	5.95122	4.81824e-09	2.49493e-07	9.94456
GALNT6	1.49358	2.63778	5.97135	4.29254e-09	2.25857e-07	9.9236
FLJ23867	2.40706	3.77415	5.96277	4.5093e-09	2.35741e-07	9.77144
TPBG	1.7858	3.81626	5.95039	4.84111e-09	2.49884e-07	9.70613
EPB41L4B	3.28637	-1.13762	5.86125	8.0427e-09	4.03644e-07	9.62116
SLC9A4	4.11338	-4.77591	5.8237	9.9415e-09	4.92875e-07	9.60594
CCDC71	0.952926	3.82788	5.92286	5.66665e-09	2.86575e-07	9.59086
PDE1A	2.87183	3.33394	5.92261	5.67492e-09	2.86575e-07	9.54977
IL13RA2	3.07813	-0.282089	5.83875	9.13301e-09	4.54173e-07	9.40224
EFNB3	2.28222	0.906658	5.84287	8.92311e-09	4.45092e-07	9.35223
IRS1	2.43102	4.12101	5.85908	8.14201e-09	4.07375e-07	9.202
TSPY26P	2.31918	-0.353731	5.77262	1.32395e-08	6.42708e-07	9.14945
SUSD5	2.64226	0.929363	5.81043	1.07116e-08	5.27846e-07	9.11902
ZNF667	2.50644	1.00016	5.80258	1.11944e-08	5.49975e-07	9.08811
HOXD1	2.3736	0.850001	5.7925	1.18454e-08	5.80213e-07	9.07787
PHYHD1	2.85081	1.75089	5.81146	1.06502e-08	5.26408e-07	9.00187
IGF2	6.23155	4.17215	5.79132	1.19238e-08	5.82304e-07	8.97344
C2orf15	1.80085	0.432448	5.74406	1.55254e-08	7.47006e-07	8.96815
PRRT3	1.53535	0.852252	5.72328	1.74251e-08	8.35943e-07	8.8373
AGBL4	2.27235	-1.96973	5.68428	2.16213e-08	1.02222e-06	8.82248
HSPB7	2.76999	0.968454	5.75263	1.48019e-08	7.14301e-07	8.78925
WWP2	1.2566	6.06318	5.77879	1.27905e-08	6.22766e-07	8.78451
ATP1A2	2.70947	2.08327	5.75267	1.47984e-08	7.14301e-07	8.66225
GLS2	2.25076	0.567524	5.68838	2.1138e-08	1.0052e-06	8.58682
ATP12A	3.09604	-5.6627	5.6207	3.06547e-08	1.42048e-06	8.54503
MST1L	3.36998	1.81946	5.70973	1.87839e-08	8.98486e-07	8.41109
PGM5	2.32917	4.08994	5.70623	1.91521e-08	9.13423e-07	8.36983
EPHA1	2.06111	1.19233	5.65065	2.60173e-08	1.22296e-06	8.31547
HMOX1	-2.75872	8.11532	-5.68519	2.15129e-08	1.02005e-06	8.26202
NSG1	2.68606	-0.562699	5.59859	3.45868e-08	1.59814e-06	8.20547
FRAT2	1.04324	2.65467	5.63586	2.82151e-08	1.31867e-06	8.16049
COL8A2	2.23897	2.63369	5.65642	2.52055e-08	1.18823e-06	8.14102
MTURN	2.223	5.00773	5.64752	2.64683e-08	1.24059e-06	8.07609
PEG3	1.82733	2.05749	5.62153	3.05166e-08	1.41811e-06	8.0569
ZNF676	3.65656	-2.47468	5.53957	4.76325e-08	2.17629e-06	8.01089
TNNC1	3.07541	-2.96148	5.52203	5.23586e-08	2.37228e-06	7.99507
SFRP1	3.05466	1.95994	5.62855	2.93667e-08	1.36857e-06	7.98647
CLCNKB	3.92612	-0.742226	5.56647	4.11814e-08	1.89214e-06	7.9022
USP44	2.42277	-2.42936	5.50256	5.81381e-08	2.60519e-06	7.89837
PGM5P2	2.17034	-2.48166	5.48698	6.32056e-08	2.81679e-06	7.83584
B3GNT7	1.66502	1.72075	5.55337	4.42089e-08	2.02554e-06	7.78179
SCN2A	3.07183	-1.30064	5.50483	5.74327e-08	2.58068e-06	7.76921
CORIN	1.67229	-0.359379	5.48152	6.50805e-08	2.89245e-06	7.6956
ABCA1	-2.16131	6.83206	-5.56661	4.11506e-08	1.89214e-06	7.67179
SLC44A2	1.62477	7.77072	5.53813	4.80062e-08	2.18723e-06	7.58659
ZFP28	1.55314	2.30189	5.52594	5.12666e-08	2.32927e-06	7.55815
PCDH20	3.23384	-1.05024	5.4724	6.83316e-08	3.02868e-06	7.55322
TLR5	1.55932	2.78939	5.519	5.32189e-08	2.40458e-06	7.45928
PRR15	2.47466	-0.335885	5.44965	7.71493e-08	3.39187e-06	7.44041
CA10	3.69973	-4.80093	5.3915	1.05013e-07	4.48395e-06	7.38739
ADGRA3	1.45904	5.08292	5.51103	5.55499e-08	2.50297e-06	7.33888
AMD1	1.96705	6.929	5.48877	6.26012e-08	2.7975e-06	7.30981
LGI2	2.02029	1.6168	5.4659	7.07471e-08	3.12725e-06	7.2832
CNKSR1	3.2129	-1.30937	5.41064	9.49105e-08	4.09547e-06	7.27583
ZNF44	1.09471	3.72079	5.45336	7.56389e-08	3.33445e-06	7.07674
FGF13	1.86826	2.71517	5.44661	7.84101e-08	3.42881e-06	7.06323
CGN	2.95283	3.30655	5.44899	7.74207e-08	3.39465e-06	7.01632
VWA7	1.95721	1.90704	5.41916	9.07214e-08	3.93552e-06	7.00437
PADI1	3.47448	0.920189	5.42107	8.98043e-08	3.90613e-06	6.96447
CRABP1	4.12153	-4.78038	5.30388	1.66239e-07	6.7619e-06	6.94084
GSTM3	2.73468	4.56859	5.4267	8.71642e-08	3.80143e-06	6.92419
KCNJ5	2.19666	1.98245	5.40765	9.64237e-08	4.14978e-06	6.9009
RIC3	3.28599	0.0606751	5.37613	1.1388e-07	4.81218e-06	6.88077
KIAA2022	3.31673	-1.52775	5.32424	1.49495e-07	6.17322e-06	6.8496
KIF9	1.11045	2.20228	5.36773	1.19026e-07	5.00369e-06	6.83545
PRTG	2.11715	0.341056	5.33848	1.38767e-07	5.77405e-06	6.82776
ITGB6	3.18949	3.3293	5.41081	9.48228e-08	4.09547e-06	6.82338
NLRP2	3.11176	-0.471893	5.34086	1.37046e-07	5.71702e-06	6.81201
IGFBP2	3.22729	4.17302	5.39519	1.02986e-07	4.42054e-06	6.76698
EPN2	0.996128	5.43483	5.39227	1.04588e-07	4.47754e-06	6.72441
RSPH1	2.22709	1.29899	5.34932	1.31108e-07	5.48336e-06	6.7084
ILDR1	2.23734	2.42865	5.37716	1.13262e-07	4.79848e-06	6.70311
DAB2	-1.85749	8.80214	-5.38395	1.09278e-07	4.64177e-06	6.69555
LZTFL1	1.04348	4.58691	5.38512	1.0861e-07	4.62544e-06	6.68823
PLA2G4A	1.73315	2.15373	5.35187	1.29366e-07	5.42437e-06	6.6564
MAGED4	3.35667	-0.580961	5.31157	1.59715e-07	6.52911e-06	6.65284
S100A14	2.31495	0.950102	5.32091	1.52117e-07	6.24984e-06	6.61663
IL32	-2.60374	8.48053	-5.36893	1.18272e-07	4.98485e-06	6.60227
PAPPA2	3.72276	-1.50516	5.28104	1.87193e-07	7.55768e-06	6.58707
COL4A5	2.42151	2.57817	5.3378	1.3926e-07	5.77981e-06	6.47873
TDGF1P3	3.43405	-4.92955	5.20167	2.81819e-07	1.11033e-05	6.46831
MNS1	1.542	2.85524	5.3231	1.50386e-07	6.19433e-06	6.4489
CHST14	1.19694	5.31783	5.33604	1.4055e-07	5.81854e-06	6.44027
CLDN8	4.5091	-4.14282	5.20384	2.78707e-07	1.1014e-05	6.39162
RANBP3L	3.12578	-1.93925	5.21639	2.61326e-07	1.03963e-05	6.38183
PPL	2.51466	4.9699	5.31346	1.58145e-07	6.48114e-06	6.35592
SEMA6D	2.11013	2.9282	5.30998	1.6104e-07	6.56683e-06	6.33204
SBK1	1.68918	1.02239	5.24396	2.26771e-07	9.08811e-06	6.31888
LRFN5	3.3736	-2.33413	5.18907	3.00591e-07	1.18143e-05	6.25898
SLC52A3	2.2558	0.830639	5.24033	2.31048e-07	9.23682e-06	6.23548
C11orf70	2.79898	-0.194035	5.21944	2.57269e-07	1.02599e-05	6.21899
ZDHHC13	0.898925	4.24071	5.28504	1.83345e-07	7.43917e-06	6.19942
ERMP1	1.74597	5.62912	5.2829	1.85393e-07	7.5036e-06	6.19805
SCN7A	3.41272	-4.59785	5.14481	3.76595e-07	1.45216e-05	6.18855
MAB21L3	3.25649	-0.835334	5.18372	3.08919e-07	1.20884e-05	6.06608
SH3GL3	2.98495	-4.91848	5.11283	4.42771e-07	1.69532e-05	6.05318
FZD7	1.74675	3.76966	5.25601	2.13089e-07	8.58196e-06	6.04151
SHISA2	2.68823	-0.273148	5.17135	3.29052e-07	1.27486e-05	6.01154
WEE1	1.83239	4.77148	5.24906	2.20879e-07	8.8738e-06	6.00598
CYP2C18	3.4805	-4.03058	5.09237	4.90856e-07	1.87064e-05	5.91095
DLX3	2.48141	-2.64112	5.07951	5.2362e-07	1.97246e-05	5.82462
LRRC4C	3.01506	-0.942568	5.12376	4.18984e-07	1.60801e-05	5.82292
PAPSS1	0.942288	5.60948	5.21114	2.68468e-07	1.06545e-05	5.81612
PLIN2	-3.00603	9.61462	-5.20372	2.78879e-07	1.1014e-05	5.78219
MARVELD2	2.03573	2.4619	5.18364	3.09048e-07	1.20884e-05	5.74733
GJB5	2.56632	-2.78344	5.04823	6.12413e-07	2.28061e-05	5.68009
KIF5A	2.89839	-3.69127	5.04078	6.3561e-07	2.35624e-05	5.67811
AMIGO2	1.70141	3.68997	5.18089	3.13413e-07	1.22007e-05	5.6731
NAT14	1.89802	3.82993	5.18183	3.11909e-07	1.21712e-05	5.67023
LMO4	1.30402	4.8928	5.17323	3.25898e-07	1.26565e-05	5.62407
TTC9	1.67418	2.78679	5.15051	3.65843e-07	1.41405e-05	5.58581
SMPDL3B	2.38957	2.1078	5.14199	3.82024e-07	1.46962e-05	5.54649
RASL11B	2.80775	-0.513486	5.05538	5.90923e-07	2.21576e-05	5.47021
SFTPD	1.96322	0.0216689	5.04726	6.15409e-07	2.28655e-05	5.46699
C1QTNF7	2.24715	1.04129	5.08994	4.96902e-07	1.88409e-05	5.46621
IGSF22	2.2819	-1.96577	5.00401	7.63157e-07	2.79727e-05	5.43372
HOXD3	1.79001	1.86564	5.08803	5.01694e-07	1.89424e-05	5.39407
SLC38A3	3.49707	-3.30319	4.99003	8.17869e-07	2.97111e-05	5.37874
GNPDA1	-1.32701	6.1252	-5.10777	4.54223e-07	1.73509e-05	5.3434
GNAL	1.63032	1.36139	5.04974	6.07822e-07	2.2739e-05	5.31898
DNAH2	2.71939	-2.36846	4.98089	8.55639e-07	3.08768e-05	5.31774
C1QTNF2	2.10679	0.139093	5.01652	7.17223e-07	2.63483e-05	5.28406
SCGB2A1	3.34838	-4.0163	4.94415	1.02527e-06	3.62758e-05	5.22213
RBM15B	0.806086	5.77987	5.08956	4.97851e-07	1.88409e-05	5.22134
SSC5D	2.62934	3.34124	5.09006	4.966e-07	1.88409e-05	5.22043
PIANP	2.49917	-1.42566	4.96692	9.16699e-07	3.27893e-05	5.19508
ZFHX4	2.3854	0.962304	5.03435	6.56349e-07	2.4276e-05	5.19131
SLC37A4	-1.8276	7.46994	-5.06525	5.62441e-07	2.11382e-05	5.09992
CBS	1.89818	2.6559	5.0486	6.11292e-07	2.28061e-05	5.08663
C11orf45	1.73987	1.25171	4.96602	9.20745e-07	3.2791e-05	4.92335
TMEM8B	1.4061	4.21714	5.02792	6.77682e-07	2.50083e-05	4.92272
LGR5	3.36224	-3.55642	4.88482	1.36978e-06	4.72356e-05	4.91764
ENC1	1.6387	5.18502	5.01743	7.13967e-07	2.62878e-05	4.88054
SDC1	3.17584	7.212	4.98684	8.30873e-07	3.01164e-05	4.87699
TNNI1	3.25803	-1.93449	4.90059	1.26866e-06	4.40278e-05	4.86202
C4orf36	1.62491	-2.03843	4.86921	1.47755e-06	5.05248e-05	4.85874
AIFM1	-2.00841	6.30385	-4.99169	8.1119e-07	2.95342e-05	4.83148
RALGPS1	1.5823	2.17982	4.97241	8.9222e-07	3.19846e-05	4.8219
H3F3C	0.932487	3.57054	4.99258	8.07591e-07	2.9469e-05	4.81744
RPS6KA6	3.57873	-1.24745	4.91843	1.16288e-06	4.07907e-05	4.80829
TTC38	-1.72947	6.04097	-4.98502	8.38378e-07	3.0321e-05	4.79826
H19	5.80354	6.53985	4.95287	9.82331e-07	3.48322e-05	4.7919
CBX1	0.750557	5.98347	4.99532	7.96719e-07	2.91374e-05	4.77226
GATA5	3.04665	-2.324	4.86859	1.48203e-06	5.05719e-05	4.77192
GRHL1	1.72138	1.14899	4.92357	1.13403e-06	3.98647e-05	4.74515
KRTCAP3	2.97857	1.65559	4.97641	8.74774e-07	3.14283e-05	4.74494
LINC01106	1.55143	1.10384	4.9129	1.19475e-06	4.16402e-05	4.73555
TMEM35A	2.8686	-1.80128	4.8667	1.49566e-06	5.07186e-05	4.73168
PPM1J	1.80632	-0.533026	4.86709	1.49278e-06	5.07186e-05	4.71035
FAIM	1.09305	3.62279	4.96648	9.18689e-07	3.27893e-05	4.67603
RNF144A	1.52833	4.37578	4.97664	8.73804e-07	3.14283e-05	4.67401
CACNG4	3.47134	-2.92227	4.84058	1.69681e-06	5.71831e-05	4.66324
CCDC183	2.43999	-0.33473	4.8764	1.42693e-06	4.90797e-05	4.65006
SLC24A3	2.41903	1.04581	4.91646	1.17414e-06	4.10975e-05	4.61682
MUSTN1	2.13831	1.31468	4.91585	1.17768e-06	4.11331e-05	4.61306
TM7SF3	-1.40054	7.30827	-4.9579	9.5833e-07	3.40552e-05	4.58419
CCNA1	3.36042	-3.27864	4.81384	1.92966e-06	6.37959e-05	4.57453
MTUS2	2.5476	-1.70483	4.81724	1.89848e-06	6.29394e-05	4.52818
STAMBPL1	-3.45501	3.92375	-4.80511	2.01212e-06	6.60357e-05	4.49092
SCARB1	-2.54167	7.69609	-4.93056	1.09591e-06	3.86913e-05	4.4738
APOE	-2.88892	8.52416	-4.92389	1.13226e-06	3.98647e-05	4.42699
CHAF1B	1.43558	1.75952	4.85643	1.57184e-06	5.30815e-05	4.37515
IGF2BP2	2.67995	0.888932	4.86409	1.51466e-06	5.12565e-05	4.355
VPS37B	1.22032	4.97988	4.90835	1.22159e-06	4.24846e-05	4.35179
STK24	0.738873	7.06895	4.8951	1.30303e-06	4.51245e-05	4.33833
TMEM107	0.809154	3.62032	4.88805	1.34846e-06	4.65989e-05	4.33302
RFFL	-1.06045	5.17214	-4.87606	1.42927e-06	4.90797e-05	4.31019
AQP11	-2.64121	0.799286	-4.73091	2.86433e-06	9.01933e-05	4.3063
FAM46B	2.24361	0.556506	4.81975	1.87566e-06	6.25642e-05	4.28373
REM1	1.93371	0.925822	4.82148	1.86021e-06	6.2176e-05	4.27467
CCDC13	1.93217	-0.927568	4.75523	2.55262e-06	8.17992e-05	4.22899
USP11	1.25182	6.34584	4.86998	1.47209e-06	5.04438e-05	4.21201
FSCN2	2.65691	-2.45167	4.73342	2.83057e-06	8.98236e-05	4.20331
MECOM	2.21837	4.97549	4.8675	1.48983e-06	5.07186e-05	4.18506
SLC2A12	1.51602	1.39594	4.79834	2.07849e-06	6.79404e-05	4.1638
CDC42BPG	1.85221	2.54623	4.83822	1.71622e-06	5.7718e-05	4.10616
CCDC151	2.04744	0.0798334	4.75719	2.52894e-06	8.12e-05	4.10258
TMCC1	-1.67611	6.60366	-4.83748	1.72237e-06	5.78057e-05	4.05222
ECE1	1.60119	7.66323	4.81863	1.88577e-06	6.27406e-05	4.0448
ZNF577	1.7019	2.65096	4.81357	1.93214e-06	6.37959e-05	3.99845
SLC44A4	3.19691	3.42592	4.82268	1.8495e-06	6.19449e-05	3.96372
C14orf93	0.747162	3.30557	4.79766	2.08524e-06	6.80246e-05	3.96228
OCIAD2	-1.64812	6.75406	-4.81832	1.88864e-06	6.27406e-05	3.95335
WISP3	3.39595	-3.72445	4.66315	3.93849e-06	0.000119852	3.93792
MYO1E	1.2221	6.34443	4.8067	1.9969e-06	6.56683e-05	3.91797
DOCK8	-1.81063	6.60082	-4.80388	2.02405e-06	6.62936e-05	3.9069
CLDN14	2.11089	-0.390257	4.70004	3.31316e-06	0.00010274	3.90381
MOXD1	2.83337	2.72929	4.80809	1.98362e-06	6.53634e-05	3.89663
C2orf40	2.6514	0.900284	4.75917	2.5053e-06	8.05995e-05	3.87372
EFS	2.07403	2.11534	4.78072	2.26098e-06	7.33177e-05	3.87062
TMEM150A	-1.50995	4.8643	-4.75391	2.56861e-06	8.19895e-05	3.86972
DOK5	2.04247	1.57506	4.74608	2.66588e-06	8.4928e-05	3.80437
NYNRIN	1.92225	4.54574	4.78586	2.20616e-06	7.17234e-05	3.78887
NCMAP	2.9137	-1.13169	4.67634	3.70293e-06	0.000113745	3.78761
KIAA1143	0.881445	4.8095	4.78574	2.20741e-06	7.17234e-05	3.78533
IGSF3	1.84928	5.43091	4.77547	2.31831e-06	7.50277e-05	3.76336
ADGRL1	1.62927	3.95961	4.77118	2.36621e-06	7.64263e-05	3.72279
CDR2L	1.41196	4.21108	4.76276	2.46286e-06	7.93908e-05	3.68259
ABLIM3	-3.15944	6.7451	-4.71824	3.04098e-06	9.53507e-05	3.66281
HUNK	2.20632	3.1228	4.75465	2.55967e-06	8.18643e-05	3.65532
NIT2	-1.88023	6.03432	-4.7312	2.86041e-06	9.01933e-05	3.6386
LEFTY2	2.98609	-3.21192	4.59446	5.41731e-06	0.000159786	3.63249
ZNF233	1.66585	0.0220165	4.63844	4.41917e-06	0.000133731	3.62974
EPB41L3	-2.01077	5.68774	-4.71079	3.14976e-06	9.82329e-05	3.61704
NMB	2.37385	4.12593	4.74268	2.70924e-06	8.61412e-05	3.59179
GLRX	-1.84274	6.66138	-4.73255	2.84231e-06	8.98467e-05	3.57916
MAP2	2.15014	4.78688	4.73297	2.83657e-06	8.98393e-05	3.55906
WFDC2	4.58074	4.48499	4.70768	3.19619e-06	9.94905e-05	3.52824
QRICH1	0.615783	5.59779	4.72512	2.94381e-06	9.25173e-05	3.50751
CLDN7	3.11829	4.37211	4.71449	3.09523e-06	9.67171e-05	3.49395
BTC	2.32179	-1.00714	4.5981	5.32728e-06	0.000157701	3.49098
PTK7	1.90306	4.90183	4.71792	3.04566e-06	9.53507e-05	3.4867
C16orf70	-0.654372	4.68936	-4.68649	3.53083e-06	0.000108663	3.45511
RIDA	-2.60123	6.03219	-4.6651	3.90267e-06	0.000118984	3.45239
DAG1	1.12541	6.76315	4.69284	3.42712e-06	0.000105671	3.41431
MEX3C	0.857588	5.18111	4.70378	3.25544e-06	0.000101142	3.41026
C8orf4	2.5471	5.20968	4.69331	3.41962e-06	0.000105639	3.40986
CDSN	2.05975	0.506209	4.61632	4.89693e-06	0.000146289	3.39991
P3H3	2.27537	2.95771	4.69605	3.3759e-06	0.000104486	3.39797
SOD2	-2.02646	9.97411	-4.67485	3.72882e-06	0.000114325	3.33877
STRADB	-1.88526	4.8069	-4.6113	5.01203e-06	0.000149181	3.30654
WSCD1	2.38496	4.87313	4.66623	3.88216e-06	0.00011858	3.26868
SHROOM3	2.4584	4.17599	4.66963	3.82093e-06	0.000116929	3.26577
PHACTR3	3.1762	-1.60617	4.54426	6.82166e-06	0.000196973	3.2395
CXADR	2.41807	2.66969	4.65369	4.11621e-06	0.000125027	3.21411
C22orf29	0.768976	3.91981	4.64345	4.31735e-06	0.000130893	3.19233
NAT8L	2.70252	-2.36303	4.50143	8.28975e-06	0.000233934	3.18073
CELSR2	2.04363	6.01358	4.63763	4.43582e-06	0.000133986	3.17446
BEST3	-4.57307	-0.936641	-4.45796	1.00873e-05	0.000279344	3.16764
MPZL3	1.62696	0.0282883	4.53375	7.15677e-06	0.000205157	3.1651
DACH1	1.88365	2.11706	4.6195	4.82517e-06	0.00014441	3.16312
ATP10B	2.73562	-3.44887	4.47591	9.30404e-06	0.000259416	3.15719
ROS1	3.08952	-5.33254	4.44472	1.07051e-05	0.000294951	3.10203
TNFRSF14	-1.86566	7.04433	-4.62916	4.61376e-06	0.000139104	3.09381
GRINA	-1.13967	8.06046	-4.62763	4.64676e-06	0.00013984	3.08634
ENTPD3	2.77208	-3.30329	4.46029	9.98224e-06	0.000276905	3.07968
LYNX1	1.63822	3.30518	4.62014	4.81087e-06	0.000144246	3.07464
VCAM1	-2.9184	8.90182	-4.62395	4.72661e-06	0.000141981	3.05374
ZBTB4	0.88074	7.01172	4.60887	5.06872e-06	0.000150594	3.04011
PKNOX1	0.627718	4.36788	4.61352	4.96072e-06	0.000147924	3.03626
WTIP	1.51321	2.95639	4.60213	5.22893e-06	0.000155071	3.03216
SLITRK2	3.11504	0.405128	4.56383	6.23692e-06	0.000181662	3.01303
ZNF578	1.39873	0.887356	4.51088	7.94207e-06	0.000224511	2.98647
AMACR	-2.43999	6.63027	-4.58601	5.63247e-06	0.000165833	2.98584
PROM1	6.34	3.37577	4.57199	6.00778e-06	0.000175614	2.95576
CHPT1	-1.46899	5.58446	-4.57623	5.89172e-06	0.000172531	2.95277
MLPH	2.23073	1.33724	4.55232	6.57464e-06	0.000190817	2.95049
HOXD8	1.56485	4.75324	4.59597	5.37976e-06	0.000158966	2.93178
FXYD1	2.96566	1.86878	4.57991	5.79293e-06	0.000169943	2.91124
SMARCC1	0.914225	6.11739	4.58093	5.76592e-06	0.000169456	2.8822
PRMT6	0.879603	4.02109	4.57022	6.05676e-06	0.000176729	2.85185
MUC1	3.69987	5.78722	4.54453	6.81307e-06	0.000196973	2.82334
CPXM2	3.25897	4.81338	4.55762	6.41714e-06	0.000186577	2.82227
ZBTB7C	2.40022	1.50803	4.53458	7.13e-06	0.00020511	2.81922
MYOCD	2.31161	0.848505	4.48963	8.7448e-06	0.000245925	2.73915
KIZ	0.994451	4.10553	4.54422	6.82298e-06	0.000196973	2.72622
REEP2	2.42073	-0.815468	4.41893	1.20146e-05	0.000326616	2.69787
PARP12	-0.981715	5.42715	-4.52627	7.40499e-06	0.000211529	2.69735
PLA2G4F	3.85315	-3.999	4.37217	1.4789e-05	0.000388443	2.69068
TCN1	3.49409	-4.19333	4.36384	1.53435e-05	0.000399259	2.68892
HN1L	1.16856	7.35926	4.52203	7.54941e-06	0.000215277	2.68727
GALNT7	1.24932	4.32559	4.539	6.98747e-06	0.000201365	2.68503
MYEOV	3.79368	2.07707	4.53309	7.17852e-06	0.000205419	2.6631
LURAP1L	1.61898	4.07913	4.53408	7.14608e-06	0.000205157	2.66174
CLUL1	2.17596	-1.96717	4.36881	1.501e-05	0.000393615	2.63531
C2orf50	1.82499	-2.16114	4.35635	1.58587e-05	0.000409019	2.62861
SPATA20	-1.30642	6.38023	-4.52108	7.58205e-06	0.00021583	2.62427
BACH2	1.46835	0.87249	4.42783	1.15462e-05	0.000314407	2.62136
LOC388242	1.62544	0.379989	4.41264	1.23566e-05	0.000335356	2.61188
IL15	-2.09371	2.9029	-4.37427	1.4652e-05	0.000385467	2.59038
HLA-DMA	-1.66188	7.01976	-4.51483	7.80076e-06	0.000221284	2.58453
UXS1	0.830227	5.69642	4.51513	7.79007e-06	0.000221284	2.58108
SLC12A7	-1.55538	7.63027	-4.51094	7.93971e-06	0.000224511	2.55741
HIST1H2BN	-2.05367	-1.10851	-4.29907	2.03865e-05	0.000510791	2.53215
ESYT3	2.56528	-1.3878	4.36748	1.5099e-05	0.000395312	2.52872
CDKL2	1.50047	2.85012	4.48103	9.09165e-06	0.000253928	2.51649
SETBP1	1.3434	4.93134	4.49952	8.36189e-06	0.000235563	2.50977
AKAP3	1.46132	-0.22923	4.3641	1.53255e-05	0.000399259	2.50343
DANCR	1.32657	3.64112	4.48501	8.92957e-06	0.000250689	2.48155
CDK5R1	-1.78153	1.9638	-4.33276	1.75928e-05	0.000450155	2.4773
IRF6	2.42152	2.44113	4.48204	9.05012e-06	0.00025358	2.4741
ABCG1	-1.49798	6.1358	-4.47407	9.38153e-06	0.00026113	2.45183
MFHAS1	1.67845	3.65228	4.48171	9.06365e-06	0.00025358	2.4431
SHF	1.26274	1.71263	4.40971	1.25188e-05	0.000338632	2.43803
PPP4R1	0.702144	6.08498	4.47249	9.44843e-06	0.000262544	2.40311
KCNA5	1.99483	1.00024	4.39961	1.30947e-05	0.000352455	2.38639
WFDC1	1.90999	2.34407	4.44475	1.07038e-05	0.000294951	2.37833
VANGL2	2.11537	2.51861	4.45318	1.03063e-05	0.000284926	2.3724
MAGEE1	0.854739	2.51447	4.40811	1.26083e-05	0.000339923	2.35346
SLC25A45	-2.02896	2.85685	-4.31514	1.90052e-05	0.000483609	2.34438
LINC00982	2.96385	-2.74764	4.29497	2.07543e-05	0.000519209	2.33332
MAMSTR	1.5473	-0.571779	4.31462	1.90486e-05	0.000483958	2.3313
SAMD12	1.79961	2.8487	4.43866	1.10004e-05	0.000301558	2.30795
ARRDC4	1.50881	5.80721	4.44213	1.08306e-05	0.000297907	2.29022
SQSTM1	-1.1699	9.16977	-4.43305	1.12797e-05	0.000308038	2.28301
APP	1.101	10.6247	4.39204	1.35423e-05	0.000363303	2.2659
MBD1	0.633708	5.67697	4.44027	1.09213e-05	0.000299894	2.25487
CDK19	1.4146	5.69799	4.43379	1.12427e-05	0.000307683	2.24754
ZNF662	1.81717	1.70216	4.38461	1.39963e-05	0.000371813	2.22846
GALNT16	2.0038	2.26598	4.40996	1.25051e-05	0.000338632	2.2247
WDR48	0.788267	5.25417	4.43278	1.12934e-05	0.000308038	2.221
MYO15B	-3.17832	6.59637	-4.37647	1.45099e-05	0.000382964	2.20582
CLDN9	2.10752	-1.61997	4.26971	2.31619e-05	0.000575029	2.20309
PLEKHG4B	2.2521	-0.381581	4.3071	1.96851e-05	0.000497033	2.19941
CACNB1	1.4704	1.82679	4.3576	1.57717e-05	0.000409019	2.16034
SH3RF2	2.62084	1.49203	4.38738	1.38255e-05	0.000369079	2.15681
NNAT	1.93469	-1.93212	4.24666	2.559e-05	0.000627668	2.15068
C15orf39	1.24863	5.56634	4.40821	1.26026e-05	0.000339923	2.12922
H3F3B	0.805169	8.83709	4.37833	1.43909e-05	0.000380438	2.11943
GALM	-1.2971	5.67247	-4.38126	1.42054e-05	0.000376143	2.0829
APH1B	0.984258	4.62927	4.39735	1.32265e-05	0.000355415	2.07501
PWWP2B	1.12573	2.74734	4.35745	1.57822e-05	0.000409019	2.06036
TLE2	1.6437	3.72223	4.39115	1.35958e-05	0.000363542	2.05796
DMRTC1B	2.74859	-2.93333	4.21746	2.90159e-05	0.000697022	2.05416
TMEM140	-1.21918	7.07096	-4.39152	1.35739e-05	0.000363542	2.04584
CLDN3	2.54804	3.95515	4.38587	1.39184e-05	0.000370347	2.02804
FAM46A	1.19994	5.0071	4.38681	1.38604e-05	0.000369407	2.0268
ENOSF1	-1.97861	5.39675	-4.33257	1.76077e-05	0.000450155	2.02381
CCDC8	2.70437	3.16957	4.38325	1.40807e-05	0.000373448	2.01525
DPP9	-1.24659	6.38256	-4.37457	1.46326e-05	0.000385467	1.99415
IL1R2	2.7539	2.12675	4.35684	1.5825e-05	0.000409019	1.94833
THSD4	1.87673	3.88809	4.36431	1.53113e-05	0.000399259	1.93458
CTSH	-1.41021	7.03049	-4.36378	1.53477e-05	0.000399259	1.93196
CAB39L	1.16071	3.78225	4.35614	1.58733e-05	0.000409019	1.93129
LOC100130238	2.87681	-0.948722	4.24496	2.57794e-05	0.000631363	1.92847
CASZ1	1.20194	2.64819	4.31629	1.89097e-05	0.000481931	1.8909
RASSF4	-1.6438	7.54807	-4.34892	1.63869e-05	0.000421588	1.86625
ZNF615	1.07431	3.84992	4.34024	1.70243e-05	0.000436609	1.86444
IL1RAP	1.46841	4.00114	4.34459	1.67022e-05	0.000429023	1.85666
RGS14	-2.43291	5.2066	-4.26307	2.38378e-05	0.00059091	1.85178
LAMB2	1.40912	8.58211	4.30996	1.94401e-05	0.000492371	1.84768
RGMB	0.935805	3.91042	4.3282	1.79485e-05	0.000458149	1.8199
ZBTB9	0.656552	3.4653	4.30862	1.95546e-05	0.000494505	1.81158
TUBB4B	1.6955	7.49729	4.30108	2.02093e-05	0.000507537	1.77724
ARSB	-1.63125	5.91308	-4.30287	2.00519e-05	0.000505511	1.76402
CRHBP	2.36916	-0.0594093	4.21148	2.977e-05	0.000713038	1.73396
AJAP1	2.08851	1.83769	4.28017	2.21344e-05	0.000551198	1.72479
AKR1A1	-1.20663	7.19875	-4.31091	1.93599e-05	0.000491103	1.70738
ADM2	-5.10709	4.95457	-4.13049	4.20017e-05	0.000970382	1.6939
IL11	2.62237	-3.89623	4.10431	4.68878e-05	0.00107113	1.69373
ASAP2	1.25892	5.93518	4.30155	2.01674e-05	0.000507537	1.69369
ACAD11	-2.40658	7.55188	-4.30089	2.02256e-05	0.000507537	1.68532
CAND2	1.45945	1.24096	4.21448	2.93896e-05	0.000704961	1.6749
STX1B	-3.6835	1.39174	-4.08565	5.06939e-05	0.0011296	1.66785
FBXO2	2.09449	1.08755	4.22929	2.75782e-05	0.00066826	1.66188
FAH	-1.57058	5.83521	-4.27506	2.26314e-05	0.000562715	1.65213
BTN3A1	-1.48921	6.30611	-4.28024	2.21277e-05	0.000551198	1.62046
CRYL1	-1.67283	7.0294	-4.28734	2.14556e-05	0.000535931	1.62027
SCRG1	3.02194	-2.61407	4.11682	4.44883e-05	0.0010206	1.59851
AP2B1	0.765652	8.13358	4.25517	2.46667e-05	0.00060868	1.57586
DAAM1	1.28547	3.17754	4.26143	2.40078e-05	0.000594221	1.57492
CNTN3	3.37601	-2.06494	4.13452	4.12938e-05	0.000958098	1.56772
SORL1	2.18591	7.093	4.24764	2.5482e-05	0.00062596	1.55987
ABCC6P2	-5.04391	1.99879	-4.04612	5.97541e-05	0.00128751	1.54736
KCNH8	2.69978	-3.05279	4.08017	5.18676e-05	0.00114947	1.52777
GDF7	2.18012	-2.71269	4.07751	5.24472e-05	0.00116074	1.52759
ELFN2	2.87572	0.97806	4.22404	2.8208e-05	0.000680623	1.51736
APBB2	1.222	6.43164	4.25348	2.48475e-05	0.000611295	1.51379
BCAM	1.94025	7.63939	4.23286	2.7158e-05	0.000660023	1.51238
GEMIN4	0.688493	4.38866	4.25364	2.48304e-05	0.000611295	1.49532
RNF135	-0.82194	5.40978	-4.24336	2.59572e-05	0.000634764	1.48918
LHX2	2.73986	-3.90336	4.05267	5.8153e-05	0.00126303	1.48545
NCKIPSD	1.02473	5.27163	4.25542	2.46407e-05	0.00060868	1.47998
TPCN2	-1.41918	4.95267	-4.20251	3.09353e-05	0.000737698	1.4671
GPC5	2.49656	-3.58225	4.03791	6.18196e-05	0.00132502	1.42708
CES2	-1.63577	7.95842	-4.24078	2.62478e-05	0.000640909	1.42087
AQP3	-3.10885	6.44982	-4.18155	3.38299e-05	0.000804373	1.41459
HSD17B14	-3.40788	4.96754	-4.10355	4.70374e-05	0.00107155	1.40355
FASTKD3	-0.988639	3.30691	-4.13081	4.19442e-05	0.000970382	1.39761
INPP5A	0.911834	4.80062	4.2342	2.70017e-05	0.000658334	1.39367
FAM43B	2.14126	-0.774407	4.09203	4.93605e-05	0.00111204	1.39248
CRLF1	2.80162	-0.493933	4.12503	4.29779e-05	0.000990131	1.39026
CRELD1	0.848224	5.07478	4.23343	2.70924e-05	0.000659559	1.3882
CD55	1.37922	5.00616	4.23257	2.71924e-05	0.000660023	1.38778
VWDE	3.19157	-3.08777	4.05315	5.8037e-05	0.00126219	1.38148
TPMT	-1.20725	6.09689	-4.22205	2.84499e-05	0.000685446	1.37655
GLT8D1	0.686109	5.21333	4.229	2.76137e-05	0.00066826	1.37011
ZNF229	1.63433	2.35467	4.19486	3.19631e-05	0.000761095	1.3692
LEPROTL1	-1.1278	6.78167	-4.2251	2.80801e-05	0.000678539	1.35665
TTYH1	2.24746	-1.59527	4.05877	5.66995e-05	0.00123971	1.3483
SOD3	1.94762	4.88528	4.21966	2.87432e-05	0.000691489	1.34513
CCDC184	1.41684	0.4301	4.09575	4.8598e-05	0.00110095	1.34089
STX3	-1.20788	6.01765	-4.21051	2.98939e-05	0.000714955	1.33557
SGPP1	-1.35387	5.06428	-4.17591	3.46515e-05	0.000822709	1.32744
ZNF620	0.81529	0.941151	4.08634	5.05487e-05	0.00112791	1.31308
TMEM130	3.92374	3.38722	4.20672	3.03829e-05	0.000725587	1.31081
ZNF681	0.996778	1.75175	4.12425	4.31191e-05	0.000991982	1.30099
HLA-B	-1.22114	11.6044	-4.16692	3.60023e-05	0.000846159	1.28216
TIMD4	-5.44951	1.92633	-3.96957	8.18403e-05	0.0016728	1.27674
LRRC15	3.01893	-1.05864	4.08163	5.15524e-05	0.00114404	1.27587
GSTO2	2.45434	1.17437	4.15467	3.79221e-05	0.000887441	1.27531
ZNF165	1.17271	1.13482	4.09009	4.97637e-05	0.00111804	1.24663
LRRC14B	3.03294	-2.5386	4.02401	6.54715e-05	0.00138869	1.23201
HOPX	1.3125	3.13708	4.17346	3.50153e-05	0.000829697	1.22538
PBXIP1	1.01166	7.55483	4.16928	3.56428e-05	0.000838917	1.21251
HCP5	-1.48458	6.09271	-4.1716	3.52925e-05	0.000831874	1.19476
NR1H3	-1.26003	5.21495	-4.15199	3.83549e-05	0.000896286	1.19424
RUFY3	-1.4401	5.70158	-4.16105	3.69094e-05	0.00086623	1.18915
MAST3	-1.22315	4.93626	-4.13529	4.11594e-05	0.00095634	1.16791
CCDC153	1.54863	-1.06374	4.00786	6.99707e-05	0.00147106	1.16624
KYAT3	0.814856	4.32814	4.17226	3.51946e-05	0.000830766	1.16138
CSGALNACT1	1.70441	4.6712	4.17293	3.50946e-05	0.000829697	1.14583
PATZ1	0.747008	5.52766	4.1729	3.50984e-05	0.000829697	1.14367
TACR1	2.18978	-0.140951	4.04935	5.89592e-05	0.00127375	1.12528
ABHD6	-2.01979	4.93034	-4.08666	5.04815e-05	0.00112791	1.11665
SLC18B1	0.989882	4.09515	4.15852	3.73079e-05	0.000874323	1.10938
WNT10A	2.15388	-0.2946	4.03254	6.32071e-05	0.00134592	1.09699
ZNF486	1.49962	2.01522	4.10798	4.61708e-05	0.00105623	1.09151
TDRD5	2.93321	-3.93334	3.94678	8.97869e-05	0.00181252	1.07542
CACNA1H	2.1023	4.54075	4.15134	3.84604e-05	0.000897465	1.06458
AQP2	3.85237	-3.15018	3.98464	7.69571e-05	0.00158691	1.06367
ARSD	1.10299	6.72692	4.14021	4.03128e-05	0.000938006	1.06257
MGST1	-4.29136	6.92453	-4.06146	5.6069e-05	0.00122922	1.06132
IL18RAP	-2.98101	0.314408	-3.91607	0.000101657	0.00200258	1.05069
ATOH7	-3.92218	-2.2605	-3.89705	0.000109734	0.00213081	1.04324
PLD6	-1.78313	2.53525	-3.98466	7.69523e-05	0.00158691	1.04113
OXSR1	0.655586	5.84872	4.14506	3.9496e-05	0.000920314	1.0355
RDH10	-2.01772	5.22393	-4.07253	5.35453e-05	0.00118184	1.00941
SLC2A1	2.20693	8.09337	4.09531	4.86886e-05	0.00110095	0.98992
CORO2A	1.49333	2.50532	4.09857	4.80278e-05	0.00108954	0.98491
SLC20A2	0.882533	4.71858	4.13183	4.1765e-05	0.000967655	0.9821
FAT3	1.86707	0.943231	4.04349	6.04095e-05	0.00129821	0.980444
MEIS3P1	1.11156	3.94737	4.12581	4.28375e-05	0.000988291	0.979518
RPL15	1.03069	9.43748	4.08843	5.01096e-05	0.00112272	0.97127
PUS10	-0.992128	2.97623	-4.00781	6.99859e-05	0.00147106	0.969361
HLA-DRB1	-1.78887	8.84108	-4.11724	4.44095e-05	0.00102023	0.940876
PKP1	2.78033	1.30983	4.08942	4.99037e-05	0.00111964	0.93889
RTCA	-0.590808	5.1037	-4.10394	4.69595e-05	0.00107127	0.93404
PADI2	1.82299	3.23431	4.10929	4.59183e-05	0.00105193	0.919271
MRPL23-AS1	2.27433	-1.95857	3.93871	9.27712e-05	0.0018544	0.918045
NACAD	1.83489	1.7542	4.06254	5.58188e-05	0.00122538	0.912614
CD74	-1.61721	11.9911	-4.07393	5.32339e-05	0.00117656	0.912122
IRF5	-1.72809	4.48175	-4.02566	6.50276e-05	0.00138229	0.910224
XDH	3.41655	-3.27961	3.9262	9.75854e-05	0.00193875	0.894499
CHL1	2.34201	1.12046	4.04965	5.88854e-05	0.00127375	0.891833
BMPR1A	0.74721	4.48418	4.10263	4.7218e-05	0.00107266	0.877779
PHLPP1	0.97434	3.79621	4.09419	4.89168e-05	0.00110357	0.874674
LTF	3.51566	3.10919	4.10295	4.71557e-05	0.00107266	0.874089
MSRB1	-1.96425	5.72569	-4.06281	5.57566e-05	0.00122538	0.870688
RERGL	2.41088	0.583461	4.02544	6.5085e-05	0.00138229	0.869688
LHX4	-2.87047	-1.72408	-3.84758	0.000133692	0.00249441	0.861801
EPCAM	2.90178	5.13282	4.08376	5.10962e-05	0.00113653	0.846292
IRF2BPL	0.998006	5.13932	4.09509	4.87331e-05	0.00110095	0.831522
ZBTB47	1.21432	4.17446	4.09105	4.95648e-05	0.00111511	0.827374
ADK	0.779719	3.36233	4.06027	5.63473e-05	0.00123367	0.809662
MALAT1	-2.40227	7.80689	-4.08689	5.0434e-05	0.00112791	0.80756
OBSL1	2.08662	6.21139	4.06817	5.45273e-05	0.00120026	0.79734
EML4	-0.897228	6.61747	-4.08354	5.11443e-05	0.00113653	0.786876
HSD3B7	-2.09413	6.7935	-4.07077	5.3939e-05	0.00118892	0.783786
GSAP	-1.5806	4.96084	-4.02264	6.58414e-05	0.00139473	0.780242
FKBP9	0.942942	7.58239	4.05369	5.79082e-05	0.00126107	0.751189
NOX5	2.41149	-2.42474	3.87989	0.000117543	0.00226358	0.732908
MYOZ1	1.74101	-0.0278855	3.92581	9.77383e-05	0.00193943	0.703941
CPXM1	2.40788	1.23806	4.00877	6.97087e-05	0.00147092	0.696554
MYO1D	1.33612	6.41815	4.04635	5.96969e-05	0.00128751	0.68755
SEC16B	-3.03091	4.59063	-3.91822	0.000100781	0.00199253	0.68542
ACRBP	-2.09273	1.54968	-3.85313	0.000130775	0.00245909	0.679226
LINC01559	3.67124	-0.764439	3.96902	8.20252e-05	0.00167449	0.678607
CXXC1	1.05682	5.41688	4.05467	5.76733e-05	0.00125932	0.676218
ARL14	2.96087	-4.4622	3.82676	0.000145186	0.00265783	0.671529
CADM4	2.02647	2.78448	4.0411	6.1009e-05	0.00130937	0.669696
SGMS1	0.856889	5.19556	4.05406	5.78185e-05	0.0012608	0.669307
LNPEP	1.57808	3.91755	4.05029	5.87298e-05	0.00127217	0.661555
NT5DC2	1.3546	4.5627	4.05097	5.85648e-05	0.00127028	0.657846
MFSD12	-1.278	6.04803	-4.03747	6.19314e-05	0.00132567	0.648497
DNMBP	0.84947	4.89838	4.04528	5.99618e-05	0.00129029	0.636669
CIDEB	-1.86748	5.73345	-4.00587	7.05468e-05	0.00147904	0.630743
EPDR1	-1.75403	5.63303	-4.00528	7.07158e-05	0.00148067	0.628365
OTULIN	-0.883868	5.09495	-4.0172	6.73335e-05	0.00142448	0.626206
TOB1	1.26059	6.03817	4.03537	6.24719e-05	0.00133374	0.624997
CASC3	0.560217	6.62775	4.03564	6.24025e-05	0.00133374	0.622199
COBLL1	1.50036	5.7891	4.03425	6.27629e-05	0.0013382	0.6204
SLC12A1	3.4031	-0.656755	3.93986	9.23408e-05	0.00184806	0.619459
MEGF10	2.23471	-2.88302	3.83151	0.000142484	0.00262606	0.613215
GSTT2	1.90654	1.5827	3.97618	7.96641e-05	0.00163241	0.592826
SORT1	1.42846	6.79412	4.00591	7.05341e-05	0.00147904	0.550867
ZNF285	1.44512	0.920853	3.91144	0.000103568	0.00203285	0.548439
LRRC49	0.879535	3.00443	3.98387	7.72012e-05	0.00158994	0.547574
TCF21	1.93293	2.09537	3.98624	7.64573e-05	0.00158462	0.543186
CNTN4	1.72011	2.70001	3.99847	7.27204e-05	0.00151487	0.534839
SLC22A5	-1.80324	6.29054	-3.99989	7.22971e-05	0.00150991	0.527095
SUSD3	-3.07136	2.38619	-3.80428	0.000158635	0.00286258	0.519398
UBAP1	0.683176	6.06826	4.01269	6.85967e-05	0.00144933	0.518707
CHODL	2.45919	-1.21716	3.85708	0.00012874	0.0024348	0.51663
OPHN1	0.911338	2.97957	3.97404	8.0364e-05	0.00164469	0.506017
DRAM1	-1.06203	6.74481	-4.0083	6.98451e-05	0.00147106	0.492647
SNIP1	0.6001	3.76398	3.9852	7.67817e-05	0.00158691	0.484654
KIAA1211L	1.39629	3.64636	3.9991	7.25329e-05	0.0015129	0.484131
TCN2	-1.82	7.55245	-4.00308	7.13577e-05	0.0014922	0.471873
REC8	1.63168	1.80934	3.94092	9.19445e-05	0.00184693	0.471279
SKAP1	1.6739	3.49739	3.99582	7.35161e-05	0.0015256	0.467163
GJA3	2.11874	-2.15372	3.80361	0.000159052	0.00286663	0.457278
GID8	0.521818	6.14031	3.99731	7.30688e-05	0.00152018	0.456667
PNPLA3	-4.22118	-0.917988	-3.72795	0.00021363	0.00365847	0.45399
GPR173	1.934	-0.660156	3.84289	0.000136203	0.00253319	0.453867
ESPN	2.50096	3.10016	3.99604	7.34501e-05	0.0015256	0.451706
RRN3P1	-2.48361	1.61647	-3.78144	0.000173503	0.00307382	0.448944
FBN3	3.1041	-4.93257	3.75879	0.000189539	0.00328192	0.447907
TASP1	0.616834	3.01659	3.9446	9.05832e-05	0.00182442	0.436347
FLVCR2	-2.18174	3.94385	-3.85843	0.000128048	0.00242577	0.432529
ULK3	-1.44146	5.2992	-3.95295	8.75662e-05	0.00177208	0.430037
ZC3HC1	-0.888869	5.1678	-3.9658	8.3109e-05	0.00169237	0.420142
SORCS2	2.77149	2.2826	3.98052	7.82637e-05	0.00160573	0.419824
ARHGEF26	1.64831	0.923813	3.88577	0.00011481	0.00221617	0.41819
ADSS	0.730712	5.42753	3.98589	7.65651e-05	0.00158484	0.404211
ICA1	1.13952	3.28801	3.96407	8.36945e-05	0.00170163	0.402781
PRICKLE1	1.44394	3.1304	3.96759	8.25039e-05	0.00168215	0.398017
IFT57	0.845489	5.35199	3.98276	7.75531e-05	0.00159517	0.39248
LPCAT3	-1.19937	6.85187	-3.9822	7.77297e-05	0.00159679	0.39211
NRGN	1.44746	3.19424	3.96229	8.43045e-05	0.00170819	0.374108
TSG1	-5.29863	-1.09684	-3.69806	0.000239702	0.00403069	0.360935
LACTB2	-2.10292	4.94393	-3.88405	0.000115606	0.0022289	0.35026
XYLB	-2.52093	2.52808	-3.77853	0.000175489	0.00309869	0.347541
AP1M2	2.08428	2.99647	3.96235	8.42818e-05	0.00170819	0.346453
TTC7A	-1.07088	5.53868	-3.95037	8.84895e-05	0.00178854	0.33956
DENND2A	1.60129	3.90358	3.96384	8.37722e-05	0.00170163	0.327366
SH2D5	-3.7292	0.629702	-3.70754	0.000231126	0.00391881	0.323696
GAL3ST1	-4.24961	6.80261	-3.86348	0.000125501	0.00239141	0.320995
RHOBTB1	-1.72594	6.23424	-3.94372	9.09074e-05	0.00182835	0.308933
SV2A	1.31552	2.19591	3.90048	0.000108235	0.00210671	0.295862
ARHGAP29	1.33201	7.32693	3.93434	9.44265e-05	0.00188287	0.294602
ZCWPW2	1.12207	-0.73809	3.7702	0.000181296	0.00317628	0.288446
KCND3	2.62839	-1.64143	3.78625	0.000170267	0.00303521	0.283831
ERBB2	1.42236	6.96345	3.93309	9.49056e-05	0.00189012	0.278118
TCF7L1	1.19545	4.08768	3.94456	9.06e-05	0.00182442	0.260191
TMEM59L	2.52147	-2.00361	3.76275	0.000186638	0.00324201	0.252754
MKRN2	0.62047	4.49087	3.94021	9.22095e-05	0.0018477	0.25162
ZNF416	0.720767	2.51592	3.87427	0.000120211	0.00230679	0.242768
PRDM2	0.72814	5.19113	3.94052	9.20951e-05	0.00184768	0.229436
DCAF12L1	3.49057	-0.364362	3.85662	0.000128972	0.0024348	0.218914
AZI2	0.688816	5.1185	3.9369	9.34529e-05	0.00186574	0.216598
BLVRA	-1.0427	5.69915	-3.91886	0.00010052	0.00198978	0.201431
ASB13	-1.34193	6.00405	-3.91669	0.000101401	0.00199995	0.191969
GLS	-1.18737	7.77415	-3.92852	9.6674e-05	0.00192299	0.191255
ANXA11	0.765986	7.60382	3.91011	0.000104125	0.00203908	0.190613
PARP6	-1.01127	5.3372	-3.90703	0.000105426	0.0020594	0.190609
LCMT2	0.716252	3.75187	3.91009	0.000104135	0.00203908	0.188248
ZC3H12D	-2.63719	-0.0279947	-3.66696	0.000269985	0.00439933	0.162117
WIPF1	-1.00813	6.75307	-3.92146	9.94708e-05	0.00197141	0.157922
UBL3	1.31037	6.10158	3.91254	0.000103113	0.00202635	0.156282
ZNF501	1.10065	1.26032	3.80776	0.000156482	0.00283913	0.155637
COL9A2	1.89279	1.52816	3.85677	0.000128896	0.0024348	0.150539
ZNF185	1.37654	4.78008	3.91763	0.000101019	0.00199481	0.14314
HSPB8	-1.87064	7.85803	-3.91527	0.000101986	0.00200662	0.133226
NLRC5	-1.67254	5.55394	-3.87512	0.000119805	0.00230169	0.128976
GAL3ST3	2.7524	-3.44981	3.6901	0.000247134	0.00411747	0.121287
CTNNBIP1	0.684242	4.42813	3.90507	0.000106259	0.00207072	0.118438
FRY	1.55502	5.2052	3.90792	0.000105047	0.00205447	0.117165
MAGI3	1.24133	3.29107	3.89199	0.000111988	0.00217054	0.113335
CYP1B1	2.72056	5.03159	3.89737	0.000109595	0.00213064	0.113305
MAL	3.35677	3.5618	3.9053	0.000106161	0.00207072	0.112799
DBIL5P	1.13549	-1.14805	3.70827	0.000230476	0.00391185	0.110969
RNF183	2.18227	0.94869	3.82921	0.000143785	0.00263679	0.100894
LRRTM1	2.7854	-5.35978	3.64462	0.000293931	0.00470265	0.0920109
PRKAR2B	1.14506	2.53425	3.85312	0.000130782	0.00245909	0.0889135
STAG3	-2.20364	0.320652	-3.6565	0.000280958	0.00455537	0.0840805
OMD	2.49784	-0.681802	3.76298	0.00018647	0.00324201	0.083272
CDK10	-1.49568	5.88184	-3.87804	0.000118418	0.00227774	0.0726509
PSMB9	-1.66607	5.87633	-3.86956	0.000122492	0.00234228	0.0617831
ITGA2	1.62144	5.3661	3.8914	0.00011225	0.0021719	0.0615881
HS6ST2	2.4413	-2.49103	3.69014	0.000247096	0.00411747	0.0539031
PSD3	1.49076	2.82245	3.8674	0.000123556	0.0023571	0.0475629
DEGS2	1.80946	0.764673	3.78445	0.000171475	0.00305009	0.0456184
ATXN2L	-0.774627	6.79686	-3.89185	0.000112047	0.00217054	0.0441981
RIMBP2	2.2374	-2.22368	3.68896	0.000248214	0.00413125	0.0392115
C5orf58	-3.27184	-1.77951	-3.60409	0.000342528	0.0052907	0.0357643
PTH1R	2.37221	3.59963	3.8882	0.000113701	0.00219736	0.0332617
PBLD	-2.8128	6.08322	-3.82063	0.000148743	0.00271989	0.0305057
HID1	1.32343	3.68601	3.87359	0.00012054	0.00231038	0.00734216
HEY2	1.53335	3.53211	3.87072	0.000121927	0.00233421	-0.00783755
NUDT10	1.91947	-1.53069	3.68393	0.000253041	0.00419447	-0.0146499
SIX4	2.26226	-1.72893	3.68307	0.000253872	0.00419971	-0.034165
CAPN1	0.816523	7.34839	3.85235	0.000131182	0.00245944	-0.0362763
FZD10	2.22001	-1.11686	3.7016	0.000236463	0.00398857	-0.0363479
ANXA2P1	1.07964	1.08857	3.74374	0.000200956	0.00345758	-0.0376735
DBNDD2	1.03834	5.13968	3.86883	0.000122851	0.0023464	-0.0416072
SYTL2	2.22549	6.16436	3.84777	0.000133591	0.00249441	-0.0440742
UBXN10	1.59848	3.44213	3.85998	0.00012726	0.00241646	-0.047057
FNDC4	1.85263	1.47864	3.7975	0.000162922	0.00292991	-0.0506466
LRCH2	1.40228	1.57459	3.77768	0.000176075	0.00310147	-0.0634418
ADAMTSL2	1.73338	3.78126	3.8605	0.000126999	0.0024143	-0.0653956
C11orf21	-2.65238	0.0652441	-3.60072	0.000346896	0.00533794	-0.0659986
C18orf8	-0.769787	4.52148	-3.816	0.00015148	0.00275758	-0.0677128
PJA1	0.799029	4.5372	3.85873	0.000127897	0.00242573	-0.0680062
PDE9A	1.4018	4.80272	3.86103	0.00012673	0.002412	-0.070311
MAP3K9	1.55689	0.286646	3.72108	0.000219373	0.00373507	-0.0721245
DACT3	1.5157	2.89379	3.83483	0.00014062	0.00260052	-0.0846778
RYBP	0.762662	5.86784	3.85259	0.000131058	0.00245944	-0.0952085
TBC1D9	1.17615	5.57849	3.85164	0.000131555	0.00246359	-0.0956177
NR2F1	2.13291	3.97898	3.85358	0.000130541	0.00245909	-0.0973257
GIT2	-1.03969	7.09716	-3.85297	0.000130862	0.00245909	-0.101905
ZNF268	0.790644	4.271	3.8453	0.000134909	0.00251198	-0.104446
MAN2B2	0.762775	6.08965	3.84735	0.000133812	0.00249441	-0.108768
PIAS2	0.951915	3.86445	3.83861	0.000138533	0.00257359	-0.113028
HLA-F	-1.48553	7.31398	-3.84981	0.000132513	0.0024787	-0.113153
TRMU	-1.10927	3.82936	-3.75064	0.000195642	0.00337328	-0.113162
MBOAT4	-2.01701	-1.6269	-3.57113	0.00038751	0.00584541	-0.115135
TMEM19	-1.16875	5.67745	-3.82915	0.000143819	0.00263679	-0.122032
ADARB2	2.36638	-3.41122	3.61199	0.000332503	0.00518991	-0.124213
ASUN	-0.740456	4.8771	-3.81668	0.000151079	0.00275335	-0.126484
DAPP1	1.41107	1.88532	3.77825	0.000175683	0.00309869	-0.12814
SCIN	3.19297	4.54568	3.83225	0.000142066	0.00262338	-0.130446
PTAFR	1.58468	2.54186	3.81474	0.000152239	0.00276522	-0.131757
RGS12	-1.0744	5.75002	-3.82987	0.000143408	0.00263679	-0.135365
ZNF488	1.87106	-2.91798	3.60716	0.0003386	0.0052549	-0.140758
RFT1	0.614117	4.22082	3.8303	0.000143169	0.00263569	-0.143992
ANXA2P2	1.26827	7.18086	3.82002	0.000149097	0.00272331	-0.144137
SMAD2	0.623527	6.30144	3.83668	0.000139598	0.00259042	-0.146342
ETFA	-0.921674	6.14732	-3.83509	0.000140478	0.00260052	-0.15231
NAP1L2	2.05232	1.22118	3.7662	0.000184146	0.00320899	-0.156736
KCTD10	0.650066	6.69613	3.82905	0.000143875	0.00263679	-0.159621
APBB1IP	-3.18157	5.61469	-3.72483	0.000216221	0.0036891	-0.160498
GORASP1	0.6018	5.13137	3.83486	0.000140608	0.00260052	-0.167485
DECR2	-1.93661	5.36733	-3.7715	0.000180377	0.00316833	-0.174968
IFI30	-1.70951	7.34397	-3.83205	0.000142178	0.00262338	-0.176809
CTSV	1.73431	-0.403431	3.67084	0.000266027	0.00434547	-0.176907
MELTF	2.33588	0.510767	3.73631	0.000206829	0.00355489	-0.178424
KCNMB4	1.29012	2.22762	3.77082	0.000180854	0.00317194	-0.184231
TSPAN2	1.61614	2.76609	3.80639	0.000157326	0.00284811	-0.189492
CAPN15	-1.25235	5.64604	-3.80448	0.000158512	0.00286258	-0.201781
CATSPER3	-2.12517	0.0791555	-3.56929	0.000390173	0.00587637	-0.202845
LSR	1.3414	5.83031	3.81906	0.000149666	0.00273064	-0.203937
PLEKHB1	1.75628	1.96995	3.77139	0.000180454	0.00316833	-0.213285
SGCA	1.92591	0.464348	3.70515	0.000233259	0.00394269	-0.214466
ESPL1	-2.70665	2.29651	-3.60513	0.000341197	0.00528014	-0.217523
BEGAIN	1.75196	-1.58937	3.61936	0.000323388	0.00509119	-0.219375
SLC46A2	-2.14255	-1.11787	-3.54459	0.000427687	0.00634759	-0.219721
CYB5R2	1.95777	0.394333	3.69633	0.000241294	0.00404497	-0.235275
IP6K1	0.624457	5.77171	3.81498	0.000152094	0.00276522	-0.240042
ALMS1P1	-2.8714	-1.7752	-3.5215	0.000465776	0.00683208	-0.245119
STMN2	3.18897	-3.23732	3.60254	0.000344523	0.00531145	-0.247301
RRAGB	0.638972	3.70026	3.78948	0.000168125	0.00301019	-0.248171
TEX30	-1.37585	3.73989	-3.69666	0.000240994	0.00404409	-0.248442
RHOBTB3	2.19913	4.90133	3.80747	0.000156659	0.00283918	-0.24891
SUSD1	1.26088	3.72759	3.80426	0.000158652	0.00286258	-0.251985
TSLP	1.91522	-1.45011	3.61335	0.0003308	0.00517324	-0.272367
ISLR2	2.05078	-1.52181	3.61473	0.000329089	0.00516115	-0.274878
MYCBP	0.723374	4.31553	3.79752	0.00016291	0.00292991	-0.279173
MACC1	2.67172	5.53222	3.7855	0.000170768	0.00304083	-0.283066
HOXB7	1.12772	4.05104	3.7946	0.000164787	0.00296017	-0.295745
AMPH	1.81191	-1.35306	3.60581	0.000340318	0.00527154	-0.296333
PVRIG	-2.26554	2.18732	-3.58901	0.000362456	0.00549955	-0.302159
CLIC6	2.82459	1.90418	3.78091	0.000173863	0.0030758	-0.304814
SPTB	1.22362	2.03431	3.7259	0.000215329	0.00367772	-0.304904
MED9	0.69639	4.5197	3.79188	0.000166551	0.00298529	-0.309952
NUPR1	-2.04409	6.92609	-3.78721	0.00016963	0.00302717	-0.310513
HLA-DMB	-1.5622	6.61211	-3.78844	0.000168816	0.00301925	-0.316081
DGCR2	0.77161	7.2209	3.77818	0.000175728	0.00309869	-0.318948
VWA5A	1.23066	4.56878	3.79333	0.000165608	0.00297165	-0.321656
EVPL	1.49695	3.72467	3.7879	0.000169173	0.00302232	-0.322652
TAC1	2.51041	-5.28337	3.51759	0.000472547	0.0068942	-0.328697
CYP39A1	1.97715	1.00693	3.70428	0.00023404	0.00395178	-0.331418
PTPRU	2.04367	5.22488	3.7829	0.000172513	0.00306188	-0.333541
CSRP1	1.23418	7.60934	3.76302	0.000186443	0.00324201	-0.336786
MCHR1	2.92028	1.53312	3.76744	0.00018326	0.00320381	-0.337708
HAS2	2.09487	-0.691551	3.62741	0.000313717	0.00496317	-0.338644
DMXL2	-1.16303	5.14944	-3.75305	0.00019382	0.00334539	-0.339814
VGLL4	0.770111	6.27759	3.78318	0.000172327	0.00306188	-0.340401
RBP5	-3.12402	7.24622	-3.75399	0.000193114	0.00333674	-0.353661
MANSC1	1.19599	4.48875	3.78135	0.000173563	0.00307382	-0.364324
RHBDL1	-4.26256	0.895555	-3.49673	0.000510164	0.00729937	-0.372887
SERPINF2	-4.15928	7.1171	-3.69113	0.000246155	0.00410956	-0.373601
DMKN	2.87666	2.59132	3.77425	0.000178453	0.00313996	-0.378596
AACSP1	-4.96264	-0.24523	-3.47444	0.000553454	0.00775548	-0.381869
SOX9	2.2226	5.7364	3.75907	0.000189335	0.00328187	-0.390871
ZBTB22	0.660281	4.77217	3.76798	0.000182871	0.00320043	-0.407283
RGL4	-2.1857	-0.551291	-3.49545	0.000512556	0.00730533	-0.408469
BTN3A2	-1.42133	7.0639	-3.7668	0.000183717	0.00320836	-0.417861
KCTD2	0.64669	5.72071	3.76633	0.00018405	0.00320899	-0.419736
BEND3	0.739019	1.77825	3.651	0.000286896	0.00462881	-0.433456
PATL2	-3.15525	0.111431	-3.48302	0.000536412	0.00758182	-0.434632
NXN	1.51938	4.15886	3.76183	0.000187309	0.00325021	-0.434818
CCDC173	1.15032	1.91752	3.67714	0.000259702	0.00427447	-0.439758
FAM84A	1.31903	3.89921	3.75606	0.000191561	0.00331341	-0.441176
FANCE	0.853435	1.61925	3.64449	0.000294078	0.00470265	-0.448462
NOS2	1.75339	1.44329	3.67937	0.000257497	0.00425105	-0.465911
MYH14	3.3366	3.48697	3.75024	0.000195949	0.003375	-0.467647
SGK3	-1.02187	4.52612	-3.69293	0.000244461	0.00409354	-0.474933
ABCC4	-1.79523	5.9801	-3.72287	0.000217861	0.0037132	-0.476631
FAM69C	2.4345	-3.2019	3.51593	0.00047544	0.00691168	-0.477497
CDR2	-1.04413	5.40099	-3.7278	0.000213753	0.00365847	-0.477988
CDH2	-4.72502	6.37073	-3.59917	0.000348917	0.00535082	-0.48321
ULBP3	1.34519	0.170043	3.59032	0.000360689	0.00549319	-0.487957
CACNA1D	1.62598	2.60501	3.71955	0.00022067	0.00375323	-0.490173
ROR2	2.40608	1.42812	3.69685	0.000240811	0.00404409	-0.499588
CEACAM4	-2.91884	-1.56711	-3.44086	0.000625209	0.00858624	-0.508735
LY75	1.69081	4.59522	3.73491	0.000207952	0.00357043	-0.534417
CECR7	2.01956	-1.70661	3.52898	0.000453113	0.00667032	-0.543481
LRFN3	1.05345	2.53799	3.67431	0.000262519	0.0043078	-0.548595
USP4	0.570774	5.73482	3.73098	0.000211141	0.00362136	-0.549589
PCDH7	1.91572	1.58239	3.66907	0.000267824	0.00436848	-0.549625
BAG5	0.786663	5.81533	3.726	0.000215238	0.00367772	-0.562113
SRRM2-AS1	-1.81333	-1.44765	-3.4377	0.000632378	0.00866554	-0.568937
XPNPEP3	-0.83876	3.30561	-3.61124	0.000333435	0.00519949	-0.569052
SDR42E1	1.87098	1.58303	3.66134	0.000275831	0.00448115	-0.570101
TEX2	1.20607	6.00333	3.71831	0.000221728	0.0037673	-0.571252
SLC14A1	1.7681	2.63547	3.69901	0.000238826	0.00402011	-0.582425
CCDC181	2.27288	-1.90232	3.51881	0.000470422	0.00688784	-0.584309
TMEM164	0.729641	4.04602	3.70592	0.000232568	0.00393508	-0.594682
KHK	-3.78176	6.83045	-3.63521	0.0003046	0.00484243	-0.598157
FLCN	-0.922951	5.21373	-3.69269	0.000244694	0.00409354	-0.598378
UBASH3B	1.14069	3.22672	3.68723	0.000249866	0.00415027	-0.624514
CUBN	-4.96923	7.90364	-3.62071	0.000321746	0.00507053	-0.624906
FAM181B	2.0201	-2.45305	3.48021	0.000541938	0.0076168	-0.626637
KIF21A	-2.00511	5.41336	-3.64458	0.000293973	0.00470265	-0.631835
SLC45A1	1.20379	1.71351	3.61448	0.000329394	0.00516115	-0.633715
ANKRD35	1.72491	-0.938192	3.51681	0.000473902	0.00689547	-0.639264
C3orf52	1.76425	1.08495	3.60797	0.00033757	0.00524391	-0.640019
MFAP1	0.60033	5.24403	3.70612	0.000232386	0.00393508	-0.640798
ARFGEF3	1.88216	2.88488	3.69204	0.000245301	0.0040995	-0.645102
TMIGD1	-4.29291	-2.58702	-3.38187	0.000772619	0.0101631	-0.648081
ALS2CL	1.61099	2.56945	3.67105	0.00026581	0.00434547	-0.649181
ABHD17C	0.96101	2.90323	3.65613	0.000281354	0.00455727	-0.656974
MAL2	3.43402	4.70175	3.68314	0.000253811	0.00419971	-0.658954
HLA-DQB1	-1.97223	7.79436	-3.69981	0.000238091	0.00401189	-0.663412
CCDC150	-4.91673	2.06416	-3.41566	0.000684644	0.00921389	-0.666499
CACNA1E	-4.71103	0.827498	-3.39886	0.000727148	0.00970362	-0.667264
SLC9A7	1.40837	1.17602	3.58942	0.000361906	0.00549788	-0.670581
CISH	-2.25902	5.07511	-3.59971	0.000348204	0.00534798	-0.676353
RAB29	-1.45187	5.45181	-3.66003	0.000277208	0.00449905	-0.677336
ZNF85	0.714734	2.31614	3.60616	0.000339873	0.00526964	-0.687485
C19orf12	-0.682404	5.08328	-3.67072	0.000266147	0.00434547	-0.687629
NECTIN1	1.00236	4.33006	3.68777	0.000249351	0.00414593	-0.694234
OGFRL1	-1.40178	4.34327	-3.60021	0.000347555	0.00534304	-0.700119
KIF26B	1.56493	1.23864	3.58934	0.000362008	0.00549788	-0.700318
CYP4V2	-1.24403	6.20589	-3.67986	0.000257015	0.0042474	-0.705248
TAP1	-1.11304	7.61179	-3.68533	0.000251685	0.00417623	-0.710424
NEK8	0.829446	2.45684	3.60983	0.000335212	0.00521722	-0.720281
HSPB6	2.09675	3.24734	3.67726	0.000259582	0.00427447	-0.727715
GLB1L	-2.06683	5.44315	-3.61451	0.000329357	0.00516115	-0.731447
BSND	3.07747	-5.15477	3.40521	0.0007108	0.00951876	-0.733229
USP46	0.716217	3.9968	3.66634	0.000270627	0.00440506	-0.733905
SUMF1	0.976466	5.44366	3.67835	0.000258501	0.0042633	-0.737616
SYTL5	2.2782	-1.3091	3.49316	0.000516874	0.00735025	-0.741125
KIAA0040	1.02524	5.95426	3.67306	0.000263773	0.00432403	-0.7421
C12orf43	0.458234	3.84761	3.65098	0.000286914	0.00462881	-0.745409
SEMA4F	0.748387	3.57051	3.65082	0.000287089	0.00462881	-0.745761
LDOC1	1.06421	5.03706	3.67579	0.000261043	0.00429221	-0.750075
GPR18	-2.40482	-0.256649	-3.39131	0.000747022	0.00989016	-0.751376
MCM3	0.644715	5.97011	3.67254	0.000264302	0.00432834	-0.754194
TRAP1	-0.884415	6.75503	-3.67452	0.000262308	0.0043078	-0.754863
SCLY	-1.47607	4.03691	-3.56252	0.000400131	0.00598764	-0.75853
ZFAND2B	-1.1215	5.0517	-3.63113	0.000309333	0.00490334	-0.764991
ADGRD1	1.67807	0.284847	3.52769	0.000455266	0.00669599	-0.765153
NLGN4X	1.50314	1.8226	3.59907	0.000349045	0.00535082	-0.7678
ZNF197	0.530879	3.7977	3.6449	0.000293617	0.00470265	-0.770117
IL7	-1.51724	2.06812	-3.47092	0.000560609	0.00783555	-0.778963
SLC41A3	0.865897	5.22382	3.6661	0.000270877	0.00440506	-0.78487
GOLGA2P7	1.029	3.192	3.6349	0.000304952	0.00484331	-0.787208
ABCC6P1	-7.32119	1.64954	-3.34058	0.000894418	0.0112655	-0.790066
ST3GAL5	-1.52357	3.92688	-3.54335	0.000429651	0.00635362	-0.790451
RNF24	0.989671	3.64457	3.64715	0.000291116	0.00468283	-0.794204
SIM2	1.24418	0.40637	3.50233	0.000499805	0.00717003	-0.80089
TPRN	1.30184	4.04304	3.65576	0.000281749	0.00455913	-0.807016
FGD5	1.85869	6.04099	3.64323	0.000295478	0.00471169	-0.810642
PTX3	1.84033	0.00520137	3.50933	0.00048711	0.00701187	-0.811226
OVCH2	2.61327	-5.16825	3.37117	0.000802606	0.0104147	-0.812365
CRYBG3	1.02705	3.89285	3.64775	0.000290461	0.00467691	-0.814961
FAM129B	1.03082	7.53923	3.63234	0.000307919	0.00488567	-0.818681
ST14	2.38616	5.30216	3.64295	0.000295798	0.00471169	-0.822313
OPTN	-0.683754	7.46139	-3.65073	0.00028719	0.00462881	-0.827192
FAIM2	1.88255	-0.714447	3.47231	0.00055776	0.00780912	-0.835906
GCNT3	-5.13734	3.17703	-3.37837	0.000782313	0.0102492	-0.838759
PCDH1	1.4955	5.71761	3.64298	0.000295764	0.00471169	-0.841159
SFRP2	3.98841	3.33934	3.6393	0.000299916	0.00477261	-0.848483
TPGS2	0.720464	5.58383	3.64602	0.000292366	0.0046983	-0.854618
CHI3L1	2.46714	3.4369	3.64457	0.000293985	0.00470265	-0.858048
PHKA2	-1.31562	6.9689	-3.64376	0.000294892	0.00471106	-0.861765
OXER1	-2.35808	2.35803	-3.42518	0.000661595	0.00897031	-0.861903
LINC00936	0.892733	0.646126	3.47996	0.000542422	0.0076168	-0.862684
BIN2	-1.85997	4.03812	-3.51138	0.000483463	0.00697855	-0.863944
ARRB2	-0.884928	5.87327	-3.63025	0.000310367	0.00491495	-0.882736
AK5	1.90287	-1.47204	3.4313	0.000647154	0.00882258	-0.886811
TRPM8	2.29551	-2.20264	3.41809	0.000678692	0.00914889	-0.88938
AGXT	-5.19437	-1.07546	-3.30212	0.00102367	0.0125354	-0.894099
HCN3	-1.91198	2.43922	-3.4325	0.000644368	0.00880258	-0.898836
SNX10	-1.52736	6.73539	-3.62713	0.000314047	0.00496359	-0.90672
ZNF614	1.0666	3.84161	3.61912	0.000323681	0.00509119	-0.915333
ARNT2	2.11843	4.74863	3.62428	0.000317446	0.00501245	-0.91844
PRUNE2	-2.78067	7.55348	-3.61304	0.000331189	0.00517435	-0.927938
DDX39A	-0.998289	5.31303	-3.59786	0.00035063	0.00537007	-0.935864
HMCES	0.58185	5.1572	3.62173	0.000320514	0.005056	-0.940654
TANC2	1.2612	5.45888	3.61815	0.000324872	0.005105	-0.944539
FGFR1OP	-1.62133	4.36861	-3.5178	0.000472169	0.0068942	-0.948053
CHD3	1.22491	6.54411	3.60436	0.000342185	0.0052904	-0.953803
GRIK1	2.0653	-4.60634	3.32705	0.000938043	0.0116797	-0.9554
SHMT2	-1.11455	7.70733	-3.61421	0.000329732	0.00516147	-0.961081
S100A6	1.83411	8.37519	3.56903	0.000390554	0.00587668	-0.96919
SNX29	-1.17074	6.36226	-3.6083	0.000337144	0.00524229	-0.971951
RAP2B	0.919814	5.59555	3.61024	0.000334693	0.00521412	-0.977433
PDIA5	-1.6572	5.92479	-3.58507	0.000367852	0.00557623	-0.977635
AXIN2	1.16401	1.41004	3.49531	0.00051282	0.00730533	-0.983203
MPPED2	1.59684	1.31611	3.51374	0.000479284	0.00693664	-0.983372
CPAMD8	1.30782	2.58178	3.5648	0.000396756	0.00594259	-0.986785
TMEM87A	0.643298	6.3386	3.60295	0.000344	0.0053084	-0.990352
QDPR	-1.09134	5.51769	-3.5839	0.000369464	0.00559547	-0.997811
TRIM2	1.70351	5.68231	3.59639	0.000352574	0.00538972	-0.998678
AGBL3	-2.54347	0.518244	-3.32546	0.000943325	0.0117276	-1.00049
MMP7	4.40556	5.14763	3.56781	0.000392334	0.00589259	-1.00497
MMP15	1.31502	5.1389	3.60129	0.000346155	0.00533157	-1.01014
CEP57L1	-0.824495	2.63781	-3.45048	0.000603808	0.00834637	-1.01044
F3	1.82322	2.27447	3.56509	0.000396329	0.00594166	-1.0117
NUDT11	1.76731	-1.47553	3.38566	0.000762242	0.0100509	-1.01867
ITPR1	1.47466	5.9126	3.58953	0.000361758	0.00549788	-1.02262
PSMB8	-0.962397	7.26611	-3.59734	0.000351321	0.0053756	-1.02604
KCTD11	0.867933	5.18578	3.59431	0.00035533	0.00542677	-1.03877
SEPSECS	-1.03476	4.94465	-3.55265	0.000415087	0.00618875	-1.03971
NXPH4	2.27614	3.90631	3.59265	0.000357549	0.00545555	-1.04234
DMD	1.25427	4.58315	3.59176	0.000358751	0.00546877	-1.04659
CNTNAP3	-2.38977	1.60816	-3.34162	0.000891142	0.0112503	-1.05429
WDR81	-1.06482	6.12567	-3.58255	0.000371332	0.00561855	-1.05518
FAM83F	3.27718	-1.54271	3.42978	0.000650723	0.00885232	-1.05559
SYT6	-2.52381	-0.0692993	-3.29383	0.00105373	0.0128299	-1.06315
SLC26A1	-2.74657	2.8301	-3.36775	0.000812418	0.0105003	-1.06386
ZNF660	1.18541	-0.290531	3.39557	0.000735738	0.00978844	-1.06556
WDYHV1	0.639491	2.96144	3.52545	0.000459041	0.00674542	-1.07201
ZNF627	0.675849	4.27406	3.57409	0.000383252	0.00578816	-1.07618
EMP1	1.89761	6.82284	3.55639	0.000409355	0.00611446	-1.07859
DSTYK	0.71259	5.14275	3.57524	0.000381611	0.00576873	-1.10499
RBSN	0.605852	4.68139	3.57095	0.000387759	0.00584541	-1.10605
LARGE1	0.885565	3.57047	3.55176	0.00041646	0.00619789	-1.10994
HMGN3	-1.25401	6.65991	-3.56869	0.000391042	0.0058786	-1.11929
HDAC11	1.03768	4.41426	3.5674	0.000392924	0.00589602	-1.12272
ACOT13	-0.799341	5.28018	-3.54813	0.000422115	0.0062706	-1.12686
NPY5R	1.91	-0.984034	3.37484	0.000792198	0.0103207	-1.12919
CCND3	1.06046	6.22104	3.5596	0.000404504	0.00604754	-1.1311
MAMDC2	1.73535	0.534859	3.43495	0.000638687	0.00873229	-1.13323
GLIS1	-6.34479	2.96794	-3.2529	0.00121444	0.0142817	-1.14806
TFEC	-3.91192	5.30665	-3.3927	0.000743326	0.00984922	-1.14847
PDZK1	-2.79878	7.02759	-3.53352	0.000445571	0.00656523	-1.1487
BRK1	0.606393	6.82045	3.55199	0.000416101	0.00619789	-1.15135
GPR63	1.40927	-2.11371	3.31117	0.000991788	0.0122118	-1.1528
RTEL1	-1.52548	4.47682	-3.4672	0.000568235	0.00791932	-1.15394
CAMK2A	1.9302	-2.95122	3.29959	0.00103278	0.0126279	-1.15456
MYL5	-1.56459	3.11492	-3.39446	0.000738673	0.00981148	-1.15522
KIAA1217	0.768868	6.40345	3.55286	0.000414766	0.00618875	-1.15844
PNPLA1	-3.85927	-1.41939	-3.22162	0.00135225	0.0154675	-1.15859
CYBRD1	1.5469	6.32592	3.54395	0.000428707	0.00635362	-1.15943
TBC1D1	1.07858	6.77085	3.54357	0.000429312	0.00635362	-1.16178
AMDHD1	-4.4467	1.63325	-3.25819	0.00119248	0.0140945	-1.16419
LMO7	1.36854	5.98538	3.54853	0.000421478	0.00626685	-1.16636
GK3P	-2.03618	0.811027	-3.29132	0.00106299	0.0129198	-1.17261
TNFSF9	-4.06905	2.79699	-3.28666	0.00108038	0.0130773	-1.18387
SPTAN1	0.815866	8.22952	3.518	0.000471834	0.0068942	-1.19604
TMEM150B	-2.5281	-0.222598	-3.24641	0.00124191	0.0144794	-1.20085
PWARSN	0.92228	2.61151	3.4834	0.000535655	0.00757769	-1.20397
FAXC	2.63281	-2.0538	3.3355	0.000910563	0.0114108	-1.20728
SEC22C	0.585248	4.46631	3.53781	0.000438552	0.00647351	-1.20743
CLPTM1L	-0.915003	7.46736	-3.54366	0.000429158	0.00635362	-1.20823
GDPD3	-2.97645	0.942397	-3.25672	0.00119852	0.0141455	-1.21605
TSPAN33	-1.66329	5.9545	-3.51539	0.00047638	0.00691918	-1.21946
IRS2	1.87894	4.87685	3.53904	0.000436558	0.00644991	-1.22018
MME	-4.51255	6.52247	-3.39869	0.000727578	0.00970362	-1.22085
SFXN1	-0.856823	6.05662	-3.53573	0.000441942	0.00651765	-1.22494
ST7	-0.960322	5.27504	-3.51438	0.000478149	0.00692637	-1.22544
DHTKD1	-1.44051	5.8873	-3.51689	0.000473756	0.00689547	-1.23214
GLRB	2.50642	0.328637	3.42871	0.00065323	0.00887164	-1.2379
FTL	-1.2019	11.4909	-3.48667	0.00052929	0.00750718	-1.24652
FBXL22	1.09659	-0.632616	3.32098	0.000958257	0.011868	-1.24704
BICDL1	-4.27981	4.75328	-3.32374	0.000949032	0.0117781	-1.24876
DPP6	2.39024	-2.28415	3.30611	0.00100952	0.0123993	-1.25057
VRK3	-0.664105	5.24425	-3.51476	0.000477492	0.00692531	-1.25247
LNX1	1.25283	3.48419	3.51694	0.000473676	0.00689547	-1.25579
ZIK1	1.16479	1.85216	3.44078	0.000625372	0.00858624	-1.25738
ZNF132	0.97114	2.0175	3.43754	0.000632743	0.00866554	-1.2576
CDH26	-1.72712	-1.12973	-3.22415	0.00134059	0.0153556	-1.26017
REEP1	1.38838	1.54537	3.43117	0.000647454	0.00882258	-1.26134
RAB39A	-2.85699	-0.675774	-3.21217	0.00139664	0.0158455	-1.26309
TMEM141	1.34385	5.71844	3.5232	0.000462875	0.00679564	-1.26534
DSTN	0.819044	8.33068	3.49589	0.000511737	0.00730533	-1.26695
BAIAP2L1	1.65899	3.5283	3.52022	0.000467991	0.0068584	-1.27122
TNFAIP2	-1.64837	6.39995	-3.51274	0.000481052	0.00694989	-1.27599
CHST13	-4.90324	2.92611	-3.23723	0.00128178	0.0148354	-1.28021
ANO3	1.89131	1.5074	3.4543	0.000595493	0.00825943	-1.28028
ACVR2B	0.846065	3.88561	3.50842	0.000488745	0.00702372	-1.28679
ADGRE2	1.27186	3.76879	3.51086	0.000484388	0.00698572	-1.30092
TMEM135	-1.04005	5.38738	-3.49337	0.000516489	0.00735025	-1.30203
WDR82	0.594312	6.72136	3.50912	0.000487491	0.00701187	-1.3034
FZD6	1.0453	5.17981	3.51763	0.000472461	0.0068942	-1.30356
HDGFRP3	1.13032	4.26609	3.51467	0.000477652	0.00692531	-1.30368
PRKG1	1.56221	2.48907	3.48173	0.00053894	0.00759588	-1.30464
STAC3	-1.68615	1.75936	-3.29029	0.00106682	0.0129471	-1.3083
TUBA8	-2.41374	2.07821	-3.27523	0.00112416	0.0134825	-1.31006
ANXA2	1.1792	8.87692	3.47141	0.00055961	0.0078283	-1.31063
PDE5A	1.42787	4.96966	3.51327	0.00048012	0.00694259	-1.31597
GPR39	1.32333	2.76627	3.47703	0.000548265	0.00768938	-1.31662
CTSC	-0.965406	7.76485	-3.51024	0.000485491	0.00699544	-1.31666
C21orf62	2.2466	1.31892	3.45092	0.000602854	0.00834486	-1.31719
APCDD1	1.38021	3.88467	3.50753	0.000490343	0.00704048	-1.3215
RAB11A	0.575915	7.21107	3.49612	0.000511317	0.00730533	-1.32717
ZNF670	0.748054	1.30206	3.36555	0.000818796	0.0105467	-1.32776
HLA-DRA	-1.47087	10.3848	-3.47986	0.000542623	0.0076168	-1.32999
PCDHA6	1.7989	0.815376	3.39399	0.000739911	0.00981992	-1.33176
RGS1	-2.19697	6.5133	-3.48382	0.000534841	0.00757274	-1.33398
PIK3C2G	2.44244	-5.20018	3.1992	0.00145977	0.0164096	-1.33595
LDB3	1.53026	1.26682	3.39997	0.000724271	0.00967534	-1.34193
SAMD3	-2.28976	1.51712	-3.24987	0.00122719	0.0143695	-1.3443
ATP6V1B1	2.58212	-0.211389	3.36641	0.000816297	0.0105259	-1.34868
TCHP	-0.749341	4.04369	-3.42871	0.000653225	0.00887164	-1.34895
DNAH9	2.10927	-0.443771	3.33604	0.00090884	0.0114031	-1.35179
SPINT1	1.67428	6.51718	3.48209	0.000538235	0.00759442	-1.3569
PREB	-0.718015	5.8183	-3.49538	0.000512691	0.00730533	-1.35776
LRRC37A4P	0.98014	2.99681	3.46108	0.000581017	0.00807238	-1.35882
PAK1	-0.708527	5.92595	-3.4969	0.000509849	0.00729937	-1.35889
THRB	1.39543	3.42814	3.48818	0.000526379	0.00747889	-1.36126
CEMP1	-1.61868	3.69425	-3.35519	0.000849409	0.0108579	-1.36169
C1QB	-1.8119	7.7404	-3.5004	0.000503344	0.00721445	-1.36366
DGKZ	-1.07201	5.63181	-3.48156	0.00053927	0.00759588	-1.36374
ZNF883	1.68847	1.14726	3.39306	0.000742385	0.00984474	-1.36939
C8orf46	-3.20558	1.76104	-3.2195	0.00136213	0.0155591	-1.373
PIK3AP1	-2.01394	5.77733	-3.44644	0.00061271	0.00845509	-1.37822
RFPL1S	-2.02891	-1.64126	-3.1694	0.00161495	0.0177264	-1.38037
C4orf3	0.727279	7.66791	3.46904	0.000564452	0.00787577	-1.39129
DCDC2	2.33283	4.62585	3.4856	0.000531378	0.00753023	-1.39485
FTH1	-0.835906	11.0025	-3.44309	0.000620177	0.00853647	-1.39957
DBNDD1	1.49715	4.14857	3.4875	0.0005277	0.00749114	-1.40269
RAB37	-1.93503	3.67899	-3.3277	0.000935916	0.0116621	-1.40302
CLEC12A	-2.87707	1.36195	-3.20699	0.00142158	0.0160801	-1.40882
SPDYE1	-1.66637	-1.00078	-3.17715	0.00157319	0.0173851	-1.41421
GGT8P	-4.37474	0.885839	-3.1597	0.00166868	0.0181695	-1.42204
HS6ST1	0.880315	5.2883	3.48213	0.000538146	0.00759442	-1.42542
DLEC1	1.71572	-2.10603	3.23329	0.00129921	0.0149552	-1.42662
DNAH14	-1.46416	1.21928	-3.24015	0.00126895	0.0147421	-1.42871
CCDC168	-2.51468	-2.01696	-3.13877	0.00179023	0.0191102	-1.42928
ZDHHC2	1.44542	4.58189	3.48008	0.000542183	0.0076168	-1.4323
LURAP1	1.46209	0.910962	3.34864	0.000869308	0.0110173	-1.43466
TRIM10	-6.10759	1.46691	-3.1339	0.00181963	0.0193432	-1.44405
IL22RA1	-5.55164	2.1864	-3.15091	0.00171877	0.0185566	-1.45373
LILRB2	-1.82661	3.71513	-3.31816	0.000967796	0.0119498	-1.45811
LBX2-AS1	-1.82637	4.2397	-3.34521	0.000879904	0.0111257	-1.45855
ADH1A	2.27325	-3.54043	3.19405	0.00148556	0.0166194	-1.45921
VILL	0.893014	2.88044	3.42064	0.000672486	0.00909529	-1.4594
TCEAL3	0.918289	4.12564	3.46312	0.000576732	0.00802651	-1.46107
CNTN6	2.67664	-2.80869	3.22798	0.00132313	0.0151876	-1.46411
TUBA4B	-4.84292	-0.655435	-3.11438	0.00194211	0.0201513	-1.46461
SLC23A1	-6.59855	2.56303	-3.13571	0.00180863	0.0192688	-1.46576
NCSTN	0.615763	7.43044	3.45092	0.000602843	0.00834486	-1.46828
BAHD1	0.643864	5.18881	3.46913	0.000564269	0.00787577	-1.46935
COL21A1	2.13865	2.89788	3.4591	0.000585219	0.00812384	-1.47294
PYGO1	1.88476	-2.33702	3.2167	0.00137522	0.0156534	-1.47605
ANKRD28	0.799395	5.17249	3.46705	0.000568544	0.00791932	-1.47708
CERS2	-0.835217	8.65395	-3.45076	0.000603187	0.00834486	-1.47826
CCDC174	0.500819	4.07104	3.44457	0.000616873	0.00850533	-1.48631
FBXO33	0.707589	3.83112	3.44352	0.000619219	0.00853048	-1.48662
AHCY	-0.906163	7.3581	-3.46212	0.000578826	0.0080488	-1.48913
COMP	3.04817	-0.622004	3.32941	0.000930308	0.0116011	-1.49452
PYGM	1.42965	1.87241	3.3803	0.000776943	0.0102003	-1.50591
C6orf223	2.96604	4.87556	3.44091	0.000625089	0.00858624	-1.51125
DNPH1	-1.43162	5.27025	-3.40918	0.000700754	0.00940253	-1.51166
ZNF180	0.541771	2.9237	3.38939	0.000752184	0.00994235	-1.51179
SP6	1.23721	1.07882	3.32268	0.00095257	0.0118065	-1.51192
TARP	-2.55241	-0.0420158	-3.14406	0.00175876	0.018898	-1.51737
LINC00426	-2.479	-1.16997	-3.12126	0.00189809	0.0199176	-1.52337
BAIAP2L2	-6.33179	3.88781	-3.1446	0.00175554	0.0188758	-1.53067
USP53	0.968749	4.96564	3.44976	0.000605387	0.00836111	-1.5353
AMDHD2	-1.39512	4.09993	-3.33629	0.00090803	0.0114018	-1.53952
MRGPRF	1.79826	0.932589	3.33359	0.00091671	0.0114754	-1.54192
RARRES3	-1.76065	6.3647	-3.42993	0.000650365	0.00885232	-1.54281
CORO1A	-1.82363	5.95246	-3.41334	0.000690365	0.00927558	-1.54317
C9orf66	-4.1525	2.76453	-3.16553	0.00163617	0.0179111	-1.54869
PLCXD2	-1.9019	1.14564	-3.18386	0.00153785	0.0171104	-1.54915
TMEM25	1.32605	3.87286	3.43768	0.000632428	0.00866554	-1.55563
TBC1D31	-0.94562	2.34537	-3.26229	0.00117569	0.0139568	-1.56082
ABCD1	-1.02101	4.77165	-3.38881	0.00075372	0.00995459	-1.56212
TEAD3	0.789778	4.18322	3.43164	0.000646357	0.00882237	-1.56329
CYP3A4	-3.50516	-2.46482	-3.07405	0.00221954	0.0221798	-1.56362
TMEM106A	-1.50631	4.18866	-3.32944	0.000930207	0.0116011	-1.56613
POM121L10P	-2.33336	-1.42259	-3.10338	0.00201441	0.0206778	-1.56809
GPR20	1.74929	-0.91826	3.23517	0.00129087	0.0148884	-1.56997
CYP2D7	-4.15355	-1.14372	-3.07854	0.00218697	0.0219653	-1.57145
CCL15	-7.38865	1.75389	-3.07525	0.00221079	0.0221636	-1.5723
CAMK1G	1.61356	1.03264	3.31953	0.000963166	0.0119067	-1.57608
BACE1	0.669684	5.88344	3.43555	0.000637303	0.00872069	-1.57685
FAM19A5	1.66982	1.68615	3.35968	0.000836	0.0107117	-1.58366
PIP5K1B	1.51095	1.54892	3.34114	0.000892648	0.0112519	-1.58423
LRRFIP1	0.691446	7.18444	3.41852	0.000677633	0.00914216	-1.58518
CDCA2	-4.96814	4.09164	-3.16881	0.00161818	0.0177499	-1.5891
SLC17A2	-7.66555	0.728544	-3.05884	0.00233329	0.0229947	-1.58916
CENPN	-1.14474	3.16771	-3.28298	0.00109429	0.0132116	-1.59003
CDC42EP2	0.97646	3.31713	3.40365	0.000714784	0.00956427	-1.59273
METTL7B	-3.66788	5.17505	-3.25847	0.0011913	0.0140908	-1.59444
WFDC5	2.86521	-4.78632	3.13015	0.00184257	0.0195283	-1.59602
UBA5	-1.00816	6.27075	-3.42685	0.000657618	0.00892381	-1.59782
DTX1	1.39011	1.41408	3.31941	0.000963571	0.0119067	-1.59949
CCDC68	-2.30642	2.60654	-3.2058	0.00142735	0.0161342	-1.6027
PCED1B-AS1	-2.30777	0.657108	-3.13642	0.00180437	0.0192486	-1.61089
ABCC6	-6.60016	4.69472	-3.13082	0.00183849	0.0195105	-1.61156
LOC284023	0.759506	2.7685	3.3594	0.00083683	0.0107139	-1.61644
LINC00094	0.628058	5.23184	3.42469	0.000662764	0.00897868	-1.61919
RAP1GAP2	1.37267	3.9147	3.41998	0.000674079	0.00910928	-1.61983
BHMT2	-2.10551	7.27047	-3.41759	0.000679911	0.00915775	-1.62428
SCARNA17	-2.55208	-0.21729	-3.10309	0.00201637	0.02068	-1.62861
IER5	0.827668	4.84121	3.42092	0.000671811	0.0090937	-1.62887
AGRN	1.21585	8.92137	3.37508	0.000791532	0.0103207	-1.62902
NRTN	-3.11242	0.477822	-3.1046	0.00200631	0.0206336	-1.63301
GPX4	-1.20335	7.57932	-3.41888	0.000676757	0.0091379	-1.63552
DDR1	1.3223	7.48494	3.39011	0.000750254	0.00992489	-1.63763
FOXE1	2.37976	-4.84251	3.10418	0.00200907	0.020636	-1.63798
ADGRE4P	-3.43553	-1.21207	-3.0649	0.00228736	0.0226664	-1.63866
USP31	-0.786789	4.69292	-3.37196	0.000800359	0.0103938	-1.64828
SAV1	0.798931	5.12617	3.41485	0.000686626	0.00923294	-1.65241
S100A4	1.44157	5.84833	3.40612	0.000708477	0.00949545	-1.65281
HLA-DQA1	-2.04492	7.29381	-3.40909	0.000700967	0.00940253	-1.6565
RASEF	1.66868	2.27772	3.37226	0.000799497	0.0103909	-1.65905
DES	2.77769	1.25943	3.36821	0.000811076	0.0104912	-1.65964
AKAP7	-0.937973	3.53293	-3.29293	0.00105704	0.0128571	-1.66004
PLEKHG7	1.66761	-2.28905	3.14853	0.00173254	0.0186655	-1.66183
GK	-1.98807	4.1148	-3.26599	0.00116072	0.0138194	-1.66582
HAVCR2	-2.91866	5.98195	-3.31981	0.000962213	0.0119067	-1.67023
LILRA6	-2.35029	2.06382	-3.16093	0.00166176	0.0181062	-1.67132
NUSAP1	-1.5481	4.23833	-3.2964	0.00104432	0.0127309	-1.6716
TMEM231	0.783603	3.54712	3.37994	0.000777952	0.0102003	-1.67466
PDE7A	-1.27237	5.28237	-3.36892	0.000809036	0.0104732	-1.67495
AP3B2	2.43439	-1.10642	3.21747	0.0013716	0.0156264	-1.67889
VAMP2	0.845086	6.57635	3.39621	0.000734072	0.00977538	-1.67989
SALL2	1.39188	3.54764	3.39618	0.000734158	0.00977538	-1.68171
LSM11	0.576902	3.33459	3.36155	0.000830493	0.0106579	-1.68207
NEURL3	-2.52797	1.252	-3.12273	0.00188884	0.019851	-1.68232
PCDHAC1	1.64213	-0.916776	3.19366	0.00148757	0.0166304	-1.68651
SEL1L3	-1.60423	7.22061	-3.40224	0.000718388	0.00960462	-1.69097
C16orf87	-0.861198	2.84494	-3.24856	0.00123276	0.0144243	-1.69678
CD244	-2.05301	1.2668	-3.13378	0.00182036	0.0193432	-1.69728
KRT19	5.58232	5.31357	3.3446	0.000881804	0.0111411	-1.69953
CYP3A7	-5.0145	-0.0248973	-3.03765	0.00250069	0.024164	-1.69967
SHC4	1.29282	-0.63438	3.18467	0.00153365	0.0170753	-1.70018
PCDHA12	2.29067	-1.0336	3.20832	0.00141511	0.0160179	-1.70066
BTN2A2	-0.992834	4.82455	-3.35195	0.000859216	0.0109319	-1.70302
HSD17B7	-1.7018	3.90094	-3.25619	0.00120072	0.0141612	-1.70462
TFR2	2.25394	-0.317976	3.23916	0.0012733	0.014782	-1.7054
CFTR	3.21524	-3.72662	3.13616	0.0018059	0.0192523	-1.70839
SLIT2	1.8323	2.04922	3.35061	0.000863287	0.0109666	-1.71394
SEPHS2	-1.05126	6.98608	-3.39453	0.000738481	0.00981148	-1.72032
DNA2	-2.00773	1.35999	-3.13047	0.00184059	0.0195201	-1.72179
PAK3	2.08467	-1.55491	3.17331	0.00159375	0.017541	-1.72372
ZNF287	0.669871	2.58655	3.31111	0.000992005	0.0122118	-1.72495
CSF3R	-2.25987	3.75308	-3.21377	0.00138905	0.0157777	-1.72786
NRXN3	1.57233	2.873	3.36539	0.000819245	0.0105467	-1.7327
CCNG2	0.988846	6.53186	3.37682	0.00078665	0.0102895	-1.7398
GLIS3	1.1761	5.23388	3.38729	0.000757833	0.0100008	-1.74016
PIGS	0.827216	6.2013	3.38083	0.000775489	0.0101926	-1.74559
ZNF503	0.998655	3.91603	3.37491	0.000792013	0.0103207	-1.74655
CHST3	1.37572	5.28892	3.38299	0.000769547	0.0101323	-1.74911
ZMYND10	1.6793	0.901668	3.25965	0.00118647	0.0140541	-1.74969
KIAA1522	1.04418	5.93707	3.38011	0.000777473	0.0102003	-1.74977
PHYKPL	-1.10002	5.801	-3.36984	0.000806419	0.0104559	-1.75111
BIN1	-1.28003	5.90209	-3.36639	0.000816335	0.0105259	-1.75469
LAPTM4B	1.19807	6.48625	3.36942	0.000807625	0.0104632	-1.75699
TSPYL4	0.822615	5.1254	3.38295	0.000769662	0.0101323	-1.75842
MPP6	-2.56954	2.87032	-3.15692	0.00168437	0.0182614	-1.76011
LINC00574	-2.6068	-2.22792	-3.01786	0.00266694	0.0253557	-1.76086
STRA6	2.20854	-1.8826	3.15076	0.00171963	0.0185566	-1.76176
RRN3P2	-2.25586	-0.437079	-3.05857	0.0023354	0.0229947	-1.76275
GCLC	-0.983779	5.23894	-3.3516	0.000860266	0.0109367	-1.76519
FCGR3A	-1.79883	7.21025	-3.37774	0.000784056	0.0102638	-1.76651
EZH2	-1.26387	2.69726	-3.1988	0.00146178	0.0164209	-1.76772
FAM127C	0.636096	4.61459	3.3741	0.000794288	0.0103337	-1.77031
SLC7A5	2.66005	5.36725	3.36047	0.000833667	0.0106902	-1.77168
PMM1	-1.10861	5.87062	-3.36499	0.000820415	0.0105493	-1.77201
HS1BP3	-0.974244	6.22003	-3.37404	0.000794464	0.0103337	-1.77229
PTEN	0.723414	6.76598	3.36675	0.0008153	0.0105259	-1.77422
GREM1	2.67683	-0.00599685	3.25524	0.00120468	0.0141874	-1.77507
NALCN	2.28707	-0.578159	3.20487	0.00143187	0.0161516	-1.77612
BRD3	0.657894	4.91224	3.37562	0.000790003	0.0103169	-1.77743
TNFSF14	-3.445	-0.449073	-3.02825	0.00257846	0.024722	-1.77847
SLC35F6	-0.968361	6.75428	-3.37653	0.00078746	0.0102919	-1.77888
RDH5	-3.24167	3.83971	-3.15825	0.00167681	0.0182215	-1.78038
RNF32	-1.29445	1.40441	-3.13878	0.00179016	0.0191102	-1.78232
ZNF542P	1.11641	3.41026	3.35009	0.000864867	0.0109781	-1.79502
SLC31A2	-1.26687	4.86017	-3.31057	0.000993863	0.0122254	-1.79599
SEMA4A	1.14927	4.03493	3.36488	0.000820736	0.0105493	-1.79688
RENBP	-2.36649	4.09984	-3.20179	0.00144697	0.0162881	-1.80015
HLA-DPA1	-1.46663	9.2814	-3.35197	0.000859131	0.0109319	-1.80622
ADORA2A-AS1	-4.18143	2.36175	-3.06584	0.00228031	0.0226242	-1.80735
GJB4	2.42096	-3.50065	3.08385	0.00214892	0.0216632	-1.80816
ZNF559	0.7259	3.7883	3.34578	0.000878149	0.0111121	-1.80914
SMARCD2	0.558852	5.65564	3.36442	0.000822085	0.0105583	-1.81876
PDZRN4	2.28093	-2.14322	3.12114	0.00189883	0.0199176	-1.82889
C20orf197	-1.98603	-1.45643	-3.01902	0.00265698	0.0252847	-1.82897
RAB11FIP1	1.26601	5.9503	3.35347	0.000854611	0.0109029	-1.82928
ICAM1	-1.40775	7.25014	-3.35809	0.000840723	0.0107553	-1.84003
AKR1C3	-1.73082	6.99785	-3.35349	0.000854546	0.0109029	-1.84126
CNOT10	0.440943	4.14948	3.33831	0.000901597	0.0113297	-1.84191
SATB2	-2.02345	4.16294	-3.21211	0.00139696	0.0158455	-1.84279
JAGN1	0.57427	4.85972	3.35241	0.000857818	0.0109312	-1.84936
ISLR	2.39056	3.34694	3.35336	0.000854934	0.0109029	-1.85025
NISCH	0.822766	6.00693	3.34962	0.00086632	0.010988	-1.85463
CISD2	-0.844825	5.59641	-3.33929	0.000898476	0.0112992	-1.85466
GLI2	1.40753	1.76554	3.26444	0.00116698	0.0138677	-1.85802
KCNH6	-5.42819	-0.495891	-2.96685	0.00314328	0.0286939	-1.86261
ZNF354B	-1.35965	2.82455	-3.1683	0.00162099	0.0177685	-1.86433
ATXN2	-0.636623	5.28322	-3.33318	0.000918025	0.0114831	-1.86563
NYX	-3.38482	-1.32308	-2.98185	0.0029957	0.0276061	-1.87016
WHRN	1.08821	3.20404	3.31767	0.000969446	0.0119611	-1.87243
ATP2A1	-3.24063	-0.784142	-2.99151	0.00290411	0.0270062	-1.87519
RYK	0.534681	5.61357	3.34731	0.000873404	0.0110606	-1.87539
NR3C2	1.42909	3.71244	3.33969	0.000897235	0.0112923	-1.87837
PDZD3	-6.16905	2.16615	-2.99067	0.00291193	0.0270481	-1.88072
ADCY3	1.02706	5.70724	3.34125	0.000892307	0.0112519	-1.88449
MCTP1	1.23167	2.46481	3.28941	0.00107009	0.0129771	-1.88838
GREM2	2.37097	-3.0921	3.06873	0.00225871	0.0224669	-1.88901
VPS13D	0.902689	6.03201	3.33541	0.000910851	0.0114108	-1.89769
UGT1A1	-5.84108	-0.406566	-2.95069	0.0033097	0.0298587	-1.89813
NECAB2	-5.27202	0.286841	-2.96652	0.00314657	0.0287045	-1.89911
C1RL-AS1	-2.64242	4.4919	-3.17608	0.0015789	0.0174363	-1.90073
ST6GALNAC6	0.797759	5.98645	3.33242	0.00092049	0.0115051	-1.91219
TPP1	-0.747221	8.73748	-3.31609	0.000974844	0.0120187	-1.91547
IFRD1	-0.969431	5.00429	-3.29375	0.00105402	0.0128299	-1.92052
MEGF11	2.10228	0.976628	3.23845	0.0012764	0.0147865	-1.92085
SLC9A6	0.512662	4.7276	3.32627	0.000940616	0.0117028	-1.92777
OSBPL10	0.756324	5.27785	3.33016	0.000927855	0.0115882	-1.93172
GPRIN1	-1.98762	2.30637	-3.0973	0.00205548	0.0209937	-1.93307
PHEX	1.8604	-1.81831	3.08448	0.00214452	0.0216465	-1.93452
PLCE1	1.43071	3.83782	3.32358	0.000949559	0.0117781	-1.93699
ZNF502	0.980278	1.6415	3.20446	0.00143387	0.0161518	-1.93898
ABI2	0.667365	6.10696	3.3238	0.000948809	0.0117781	-1.94033
VSIG2	2.1307	-1.00621	3.12356	0.00188358	0.0198342	-1.94169
TCEAL6	0.905501	-0.213071	3.1055	0.0020003	0.0206041	-1.9452
CD160	-1.40254	0.278196	-3.03723	0.00250415	0.0241831	-1.94682
C19orf71	-1.82529	-1.0302	-2.99076	0.00291108	0.0270481	-1.94734
COL7A1	2.35778	0.216742	3.19438	0.00148391	0.0166123	-1.94795
SLC25A34	-2.82725	2.19849	-3.05365	0.00237335	0.0232537	-1.95349
SLC45A2	-3.11644	-2.08102	-2.94111	0.00341201	0.030562	-1.95719
NAP1L3	1.36037	1.08954	3.18779	0.00151751	0.0169072	-1.95847
ACAP3	-1.39838	4.60472	-3.2348	0.0012925	0.0148884	-1.96175
SGK494	-2.83823	1.59572	-3.02915	0.00257097	0.0246916	-1.96208
ARHGAP9	-2.23585	3.44528	-3.12221	0.00189207	0.0198722	-1.96688
CALCA	2.43093	-5.36283	2.97708	0.00304195	0.0279376	-1.9708
VARS2	-0.8045	5.33217	-3.29693	0.0010424	0.012717	-1.97219
LINC00924	1.54568	1.82731	3.23886	0.00127461	0.0147844	-1.97288
SAMD13	1.21111	-0.909922	3.07938	0.00218088	0.0219312	-1.97742
HGD	-2.3937	5.53213	-3.22704	0.00132737	0.0152148	-1.97895
CD9	1.42193	7.65229	3.28133	0.00110058	0.013265	-1.98047
UNC45A	0.54576	6.46706	3.30828	0.00100189	0.0123148	-1.98331
EXOSC7	0.836559	3.97242	3.29964	0.0010326	0.0126279	-1.98373
KANK4	1.67592	0.319234	3.1546	0.00169757	0.0183614	-1.98406
OAS1	-1.29169	5.73786	-3.29072	0.00106521	0.0129372	-1.98444
SLC17A7	1.51638	-1.79777	3.05279	0.00238003	0.0232878	-1.9874
CDON	-2.55664	4.85814	-3.17296	0.00159563	0.0175498	-1.98849
CCDC18	-1.68943	0.798756	-3.03009	0.00256308	0.02465	-1.99092
MYO1F	-1.74417	4.99152	-3.22752	0.00132522	0.0152009	-1.99434
HAGH	-1.04966	5.33345	-3.28099	0.0011019	0.013265	-1.99488
RUNDC1	0.445836	4.65217	3.303	0.00102055	0.0125229	-1.99528
DGKA	1.05635	3.87756	3.29814	0.00103801	0.0126729	-1.99953
NCOA7	1.30719	6.06343	3.29907	0.00103465	0.0126414	-1.99983
LDLR	1.51901	3.71972	3.30284	0.00102112	0.0125229	-2.00108
ALPK2	-5.15811	6.32761	-3.1101	0.00196995	0.0203882	-2.0034
LOC441666	1.29371	0.896325	3.15798	0.00167837	0.0182263	-2.00436
SLC47A1	-5.7982	7.14117	-3.11706	0.00192487	0.0200315	-2.00564
HLA-A	-0.949926	11.2388	-3.25577	0.00120249	0.0141719	-2.00661
ELMOD3	-0.781175	3.77394	-3.20495	0.00143149	0.0161516	-2.01091
RAB3IL1	-1.47154	4.29061	-3.19513	0.00148014	0.0165815	-2.01165
BTN3A3	-1.17241	5.69406	-3.2836	0.00109193	0.0131929	-2.01517
GPR137B	-1.37456	5.47113	-3.26732	0.00115538	0.0137658	-2.01676
SFT2D2	-1.00332	2.35166	-3.11347	0.00194798	0.0201993	-2.01851
FBXO6	-1.38799	3.92682	-3.17446	0.00158759	0.0174875	-2.0186
NOV	1.64619	4.3495	3.30245	0.00102251	0.0125306	-2.02063
B3GALT4	0.794015	3.03036	3.24765	0.00123663	0.0144386	-2.02656
CCL13	2.05143	-1.86853	3.05694	0.00234785	0.0230559	-2.03059
PARP15	-2.66021	-0.1164	-2.96207	0.0031917	0.0290189	-2.03416
L3MBTL4	-1.53588	3.12488	-3.11978	0.0019075	0.0199492	-2.03617
TBX21	-1.92229	1.039	-3.01177	0.00272012	0.0256778	-2.04663
HARS2	-0.541659	5.31697	-3.27985	0.00110625	0.013297	-2.04877
LOC645166	-2.38338	3.12062	-3.07435	0.00221733	0.0221798	-2.04885
CD300LF	-1.91017	2.16468	-3.0548	0.00236443	0.0232047	-2.05191
TMEM185A	0.564592	4.78526	3.28884	0.00107221	0.0129931	-2.05308
UNC5CL	-2.69637	4.41245	-3.12058	0.00190243	0.0199425	-2.05422
NAIP	-1.76123	1.90765	-3.0488	0.00241127	0.0234528	-2.05803
TMEM97	0.960995	3.75119	3.27368	0.00113021	0.0135252	-2.06094
LEAP2	-3.10357	0.0852064	-2.94612	0.0033581	0.0301951	-2.062
EPB41	-1.14143	6.15562	-3.28097	0.00110196	0.013265	-2.06303
CLK4	-1.2967	5.18056	-3.2424	0.00125919	0.0146496	-2.06306
PACRG	2.04398	-0.645398	3.09567	0.00206656	0.0210753	-2.06322
ECH1	-1.02127	8.06686	-3.28188	0.00109847	0.0132524	-2.06625
CWH43	2.9492	-2.78606	3.0394	0.00248648	0.0240837	-2.07229
ATP6V0A1	-0.809015	6.66578	-3.28656	0.00108075	0.0130773	-2.07266
ANP32A-IT1	-2.0689	-2.03014	-2.91865	0.00366351	0.0320208	-2.07324
KAT7	0.55704	5.68302	3.28587	0.00108334	0.0130988	-2.07382
UQCC1	-0.614036	5.49739	-3.27452	0.00112692	0.0134957	-2.07389
PTPRC	-1.74819	6.15306	-3.25918	0.0011884	0.0140667	-2.08051
SFXN3	0.823575	6.45737	3.27298	0.00113296	0.0135466	-2.08728
NR2F2	0.895829	6.97545	3.26435	0.00116733	0.0138677	-2.08868
PLN	1.9545	4.3296	3.28029	0.00110457	0.0132867	-2.09006
NEIL3	-2.3161	-0.608085	-2.93648	0.00346261	0.0308458	-2.09616
LTB4R2	-1.63845	1.57189	-3.02692	0.00258965	0.0247886	-2.09621
MID1	1.32785	5.59493	3.2728	0.00113366	0.0135466	-2.10041
ADI1	-0.956223	6.91729	-3.27777	0.00111428	0.0133836	-2.10125
GNAI1	1.02259	5.43046	3.27577	0.00112203	0.0134668	-2.10296
CCL18	2.51805	1.9939	3.25183	0.00121892	0.0143098	-2.10589
PACSIN1	-2.64295	-0.0904963	-2.93621	0.00346557	0.0308553	-2.10757
DDIT4L	2.19466	3.85935	3.275	0.00112504	0.0134831	-2.10787
NIPAL3	0.996692	5.85315	3.27066	0.00114209	0.0136373	-2.10962
CALML4	-1.0709	5.13555	-3.23481	0.00129248	0.0148884	-2.11314
RSPH4A	1.2695	-1.33926	3.01714	0.00267318	0.0253945	-2.11478
KCNC4	0.931679	3.61532	3.2515	0.00122033	0.0143098	-2.11577
MPZL2	1.30242	6.17808	3.26136	0.00117947	0.0139814	-2.11631
MBIP	0.795472	3.74442	3.2516	0.0012199	0.0143098	-2.11631
ADH1B	2.56751	2.61494	3.26479	0.00116554	0.0138666	-2.11687
TRMT12	0.417007	3.46747	3.2234	0.00134405	0.0153844	-2.11742
GGT7	0.947497	4.361	3.26795	0.00115288	0.0137461	-2.11787
C19orf54	-0.75296	4.17561	-3.19622	0.00147465	0.0165427	-2.12034
KDM5B	0.623967	5.8751	3.26963	0.00114618	0.0136761	-2.12189
MBTPS1	0.482794	7.13134	3.25762	0.00119481	0.0141119	-2.12197
TARBP1	-0.876511	4.42522	-3.20465	0.00143294	0.0161518	-2.12257
SYP	0.943834	0.996866	3.10419	0.00200903	0.020636	-2.12481
CCDC171	0.872465	0.728298	3.08446	0.00214461	0.0216465	-2.13849
GFI1	-2.22125	1.0397	-2.96812	0.00313049	0.0286058	-2.14055
RAB32	-0.886813	5.07204	-3.23116	0.00130877	0.015044	-2.14218
MFAP2	2.09142	0.626263	3.14097	0.00177703	0.0190316	-2.14577
MXRA5	2.28325	5.23097	3.25028	0.00122547	0.0143596	-2.14957
CTIF	0.698289	5.12119	3.26168	0.00117815	0.0139759	-2.15154
ENPP3	-7.5656	7.48688	-3.00819	0.00275189	0.0258411	-2.15445
HNF1A	-2.57377	5.01658	-3.1266	0.0018646	0.0196597	-2.15549
ALPK3	2.17663	5.52625	3.24558	0.00124547	0.0145106	-2.15618
UGT1A3	-5.64141	-0.791997	-2.84687	0.00458484	0.037459	-2.1657
TMIGD2	-2.01023	-1.58734	-2.89325	0.0039683	0.0336944	-2.16757
ATP9A	1.60288	5.68212	3.24775	0.00123619	0.0144386	-2.16759
USH2A	-1.91438	-1.3917	-2.89904	0.00389678	0.0333301	-2.17273
IGSF8	0.767339	5.64155	3.25399	0.00120987	0.0142383	-2.17361
LIMK2	0.828232	5.59915	3.25249	0.00121615	0.0142916	-2.17796
RALBP1	0.661997	6.23797	3.24823	0.00123415	0.0144303	-2.17957
TMEM138	-0.824648	4.32408	-3.18155	0.00154996	0.0172099	-2.18116
LPXN	-1.15816	4.54612	-3.17547	0.00158217	0.0174607	-2.18203
ADRA1B	1.31413	3.23203	3.22989	0.0013145	0.0150991	-2.18314
ARHGEF25	1.18252	3.6847	3.2387	0.00127532	0.0147844	-2.1835
GBAS	1.09342	5.78988	3.24697	0.00123953	0.014462	-2.18444
YAP1	0.7033	6.96035	3.23667	0.00128426	0.0148354	-2.18642
GPR37	2.46812	0.726356	3.15522	0.00169402	0.0183352	-2.18696
FASLG	-2.944	0.897311	-2.9252	0.00358847	0.0315704	-2.18984
TRAF3IP3	-2.02268	2.82217	-3.02903	0.00257195	0.0246916	-2.19264
E2F3	-0.726784	4.27081	-3.18042	0.0015559	0.0172624	-2.19769
CCL15-CCL14	-7.33009	1.6863	-2.84435	0.0046207	0.0376653	-2.20118
CRIP3	-3.34767	-0.512487	-2.87472	0.0042049	0.0351724	-2.20436
KYNU	-2.21319	2.81413	-3.01656	0.00267829	0.0254281	-2.20981
PARP14	-0.870869	7.33907	-3.24212	0.00126038	0.014653	-2.20985
QSOX1	1.47251	7.35639	3.21174	0.0013987	0.0158542	-2.21203
C1QC	-1.65386	7.48237	-3.24249	0.00125879	0.0146496	-2.21303
NCKAP5	-1.78826	2.41305	-3.01598	0.00268328	0.0254607	-2.21383
NLRP11	-3.48006	-0.489126	-2.86943	0.00427482	0.0356111	-2.21565
PYHIN1	-2.7552	1.51918	-2.93953	0.00342919	0.0306989	-2.21826
LLGL1	0.650689	4.66419	3.23675	0.00128391	0.0148354	-2.21888
GAS6	1.40528	6.79586	3.21741	0.0013719	0.0156264	-2.22253
TAL2	-3.50348	-0.40086	-2.86807	0.00429292	0.0357254	-2.22327
CHD6	0.708264	5.76907	3.23574	0.00128835	0.0148722	-2.23012
EHD3	1.15227	4.79644	3.23666	0.00128426	0.0148354	-2.23171
NAIF1	0.37207	3.11769	3.1647	0.00164076	0.0179494	-2.23199
UBD	-4.20767	6.38691	-3.08414	0.0021469	0.0216562	-2.23662
RIMS2	2.51747	-3.4872	2.93742	0.00345221	0.0308036	-2.23981
ANKRD2	2.44997	-2.2269	2.98321	0.00298265	0.0275315	-2.24309
CAMSAP1	0.629667	5.2893	3.23261	0.00130228	0.0149799	-2.24492
SLC9A3	2.44869	1.01914	3.15736	0.00168186	0.0182521	-2.24537
LARP1	-0.618802	7.95932	-3.21876	0.00136555	0.0155868	-2.25625
SAR1B	-0.869253	4.97462	-3.1915	0.00149849	0.0167296	-2.25625
CEND1	1.79222	-2.09674	2.95595	0.00325465	0.0294761	-2.26014
SREBF2	0.765202	6.49112	3.21813	0.00136851	0.0156096	-2.26242
CCDC160	1.61037	-0.3945	3.02221	0.00262963	0.0250683	-2.26318
AP1AR	-0.813653	4.88534	-3.18798	0.0015165	0.0169072	-2.26378
SCN8A	-2.93162	0.170015	-2.87765	0.00416661	0.0349058	-2.2685
CARMIL1	0.797579	4.4284	3.21949	0.00136217	0.0155591	-2.26895
JAKMIP1	-3.41148	-0.0802551	-2.85954	0.00440823	0.0364058	-2.26991
PAQR9	-3.61742	-2.46092	-2.81018	0.00513274	0.0403276	-2.27105
ZNF503-AS2	0.988923	1.25404	3.07153	0.002238	0.0223266	-2.27117
USH1C	-6.86896	6.6335	-2.96062	0.00320645	0.0291043	-2.27339
SCARA5	2.42448	-2.65108	2.95336	0.00328164	0.0296427	-2.27541
DTHD1	-3.12159	-1.54556	-2.83061	0.00482079	0.0387731	-2.27926
TTC16	-2.14492	-1.02638	-2.86182	0.00437721	0.0362604	-2.28029
AICDA	-3.30143	-1.40315	-2.8286	0.00485071	0.0389178	-2.2808
MGP	1.86018	8.04256	3.17442	0.00158782	0.0174875	-2.28216
KCNMB3	-1.20433	1.19973	-2.9631	0.00318118	0.0289717	-2.28235
SAMD5	-1.96513	3.82924	-3.05067	0.00239656	0.0233654	-2.28594
RPL13P5	-1.04524	0.298246	-2.93298	0.00350121	0.0310749	-2.28628
PLAT	1.41835	5.45057	3.21405	0.00138771	0.0157735	-2.28869
IGFBP5	2.21555	9.92427	3.1396	0.00178525	0.0191071	-2.28881
SLC16A11	1.76346	-0.568733	3.00953	0.00273996	0.0257588	-2.29267
PLEKHA4	1.20637	5.08107	3.21521	0.00138221	0.0157219	-2.29792
UBIAD1	0.456444	4.49061	3.205	0.00143124	0.0161516	-2.29817
CIT	-2.47108	5.94529	-3.14299	0.00176508	0.018941	-2.29955
SLC25A16	-0.929283	3.91452	-3.11166	0.00195978	0.0203087	-2.30057
PIGL	-1.23647	1.81097	-2.98145	0.00299958	0.0276263	-2.30107
IL10RA	-1.71487	5.57496	-3.16447	0.00164207	0.0179516	-2.30253
TUBB2B	1.63134	0.0875743	3.03037	0.00256077	0.0246423	-2.30443
HMGXB3	-0.59863	6.19916	-3.21148	0.00139994	0.0158572	-2.3077
MTFR1	-1.03932	5.03388	-3.1681	0.00162205	0.0177685	-2.31434
LIMCH1	1.24833	6.38828	3.19567	0.0014774	0.0165621	-2.31711
CLMN	1.34926	5.71967	3.20144	0.00144872	0.0162966	-2.32184
FCRL6	-2.23456	0.964326	-2.90136	0.00386853	0.0331406	-2.32242
CDC25B	-1.20404	5.3625	-3.17215	0.00160003	0.0175863	-2.32341
FAM81A	1.12977	1.20746	3.06038	0.00232155	0.0229079	-2.32478
MAP6	1.30129	1.4779	3.08732	0.00212449	0.0215635	-2.32586
CASR	2.59733	-0.97468	3.01292	0.00271	0.0256285	-2.33592
LINC01587	-4.38486	0.360133	-2.82197	0.00495061	0.03939	-2.33743
ITGBL1	1.86064	2.69292	3.18025	0.0015568	0.0172624	-2.33755
SYNGR1	1.36788	3.95286	3.19779	0.00146678	0.0164657	-2.3385
GCNT1	1.23777	2.68535	3.15151	0.00171526	0.0185405	-2.34501
MT1M	1.94665	0.141266	3.03605	0.0025138	0.0242457	-2.3452
FXYD4	2.66994	-5.15775	2.85099	0.00452672	0.0370846	-2.34695
SLC7A7	-2.69597	5.73198	-3.10072	0.00203229	0.0207698	-2.34973
GPT	-5.19683	3.14721	-2.86712	0.00430567	0.0358132	-2.35167
AGAP7P	-2.38869	-1.5623	-2.81738	0.00502082	0.0396969	-2.35168
DENND4B	-0.766978	5.50497	-3.18242	0.00154539	0.0171776	-2.3541
TRIB2	1.38488	6.50418	3.17971	0.00155963	0.0172702	-2.35518
DLGAP1	1.99711	-2.56133	2.91267	0.00373331	0.0323897	-2.35549
TRIM15	-7.24677	2.62593	-2.80293	0.0052479	0.0409171	-2.35685
RAB11FIP4	1.00154	3.82214	3.1823	0.001546	0.0171776	-2.35885
SYT12	1.94023	1.35989	3.10837	0.00198134	0.0204672	-2.35889
CEP85	-1.06004	2.9904	-3.02811	0.00257966	0.024722	-2.35905
PCDH10	2.52905	2.89826	3.19151	0.00149848	0.0167296	-2.35981
PARVA	0.614728	6.48124	3.18816	0.00151559	0.0169072	-2.36229
FNIP1	-0.740273	5.49163	-3.17982	0.00155907	0.0172702	-2.36423
PGR	1.40781	1.83594	3.10464	0.00200604	0.0206336	-2.36433
CLCN4	-1.32347	4.44834	-3.10091	0.00203101	0.0207698	-2.36525
SOX15	1.06019	-1.29028	2.9235	0.00360779	0.031672	-2.36587
CAPRIN2	-0.99926	3.97307	-3.08906	0.0021123	0.0214532	-2.36742
PDGFRA	2.19379	2.71096	3.17869	0.00156505	0.0173185	-2.37266
WNT9A	1.72138	-2.08047	2.91465	0.00371003	0.0322915	-2.37616
NQO2	-1.19347	5.61933	-3.16405	0.00164438	0.0179648	-2.38125
HDAC10	-1.08761	4.61809	-3.11968	0.00190812	0.0199492	-2.38218
CST5	2.19407	-5.17099	2.82495	0.00490548	0.0392244	-2.3835
CPNE4	1.94025	-4.78424	2.8298	0.00483285	0.0388184	-2.38588
NBPF3	0.998675	2.35615	3.1089	0.00197782	0.0204567	-2.38593
DMBT1	-2.924	-2.01345	-2.78401	0.00555924	0.0425712	-2.38683
SLC22A18AS	-2.34829	1.12971	-2.87828	0.00415845	0.0348553	-2.38748
RAB24	-1.052	5.44401	-3.15885	0.00167344	0.0181987	-2.39289
LTA	-2.37201	-0.651124	-2.8209	0.00496692	0.0394236	-2.40168
APOC1	-3.02892	6.16561	-3.08926	0.00211087	0.0214519	-2.4079
XCL2	-2.50467	-0.0705444	-2.82975	0.00483356	0.0388184	-2.4089
FAM35DP	-0.893912	1.87583	-2.9616	0.00319642	0.0290456	-2.41151
ABHD11	1.02768	4.64368	3.17767	0.00157043	0.0173663	-2.41322
INTS8	-0.557552	4.80665	-3.14652	0.00174426	0.0187793	-2.4135
PPFIA2	1.44785	-1.26187	2.92371	0.00360549	0.0316689	-2.41536
MAP3K14	-1.34498	5.52054	-3.14239	0.00176862	0.018954	-2.41814
CDC42EP4	0.778122	5.85838	3.17463	0.00158667	0.0174875	-2.41855
D2HGDH	-1.78967	4.5517	-3.05831	0.00233739	0.0229947	-2.41922
LRP2	-7.7035	8.07381	-2.93294	0.00350166	0.0310749	-2.42014
MS4A6A	-1.50318	6.08427	-3.15665	0.00168589	0.0182614	-2.42089
CA5B	0.664129	3.61712	3.14385	0.00175995	0.0188983	-2.42368
IFFO1	-1.19614	4.42453	-3.08681	0.00212804	0.0215727	-2.42382
SMARCE1	0.401465	6.97083	3.1638	0.00164576	0.0179678	-2.42731
RAD18	0.612876	2.36042	3.06851	0.00226033	0.0224669	-2.42855
LOC606724	-1.97964	0.769453	-2.86193	0.0043757	0.0362604	-2.43098
ANKRD16	-0.736449	2.85927	-3.01361	0.00270402	0.0255979	-2.43122
HLA-L	-1.65912	1.71446	-2.91278	0.00373201	0.0323897	-2.43513
TC2N	1.31622	4.35733	3.16952	0.00161431	0.0177264	-2.43872
PTENP1	0.619851	3.7586	3.14243	0.00176839	0.018954	-2.44134
CSTA	-1.78778	1.63871	-2.90175	0.00386377	0.0331172	-2.44145
PAMR1	1.24014	3.7496	3.15882	0.0016736	0.0181987	-2.44416
CLSTN1	0.791163	8.16314	3.13418	0.00181792	0.0193425	-2.44722
SLC16A14	0.829153	2.70568	3.09556	0.00206734	0.0210753	-2.45357
BMP8A	1.27504	2.71707	3.11988	0.00190688	0.0199492	-2.45442
PODNL1	2.03973	-0.192648	2.98561	0.00295973	0.0273674	-2.45666
TMED10	0.715415	8.37832	3.12891	0.00185025	0.0195601	-2.45724
SERTAD4	1.28808	1.52832	3.05019	0.00240037	0.0233886	-2.45733
WHAMMP3	-1.17902	3.21182	-3.00005	0.00282524	0.0264234	-2.45913
SELPLG	-1.4151	4.96436	-3.09388	0.00207887	0.0211795	-2.46322
PDGFC	0.968797	5.36532	3.16204	0.00165554	0.0180625	-2.46343
C11orf54	-1.41204	7.11443	-3.16156	0.00165825	0.01808	-2.4655
TM4SF1	1.32014	7.11359	3.13464	0.00181514	0.0193256	-2.46917
MPL	0.93082	-0.0959069	2.93251	0.00350638	0.0310848	-2.47128
KCNJ15	-3.73905	6.02618	-3.01097	0.00272723	0.0256941	-2.47235
ZYG11A	-4.29197	-1.35583	-2.73758	0.0063954	0.0468907	-2.47282
CLDN11	1.50835	0.431265	2.98473	0.00296813	0.0274296	-2.47386
C1orf198	0.876125	5.7567	3.15662	0.00168608	0.0182614	-2.47445
SCNN1D	-3.22134	0.945963	-2.8128	0.00509183	0.0401266	-2.47756
HAPLN2	1.65323	-2.15876	2.87084	0.00425602	0.0355089	-2.47864
HSPA1L	0.591389	1.91089	3.02032	0.00264577	0.0251927	-2.47899
PRAM1	-1.80925	1.59704	-2.88529	0.00406841	0.0343655	-2.47928
TLR2	-1.54249	4.7577	-3.06859	0.00225979	0.0224669	-2.47944
HIST4H4	-1.41539	-0.190026	-2.8309	0.0048164	0.0387731	-2.48355
LRRC3	1.39112	-0.145608	2.94645	0.00335459	0.0301951	-2.48696
GEMIN8P4	-1.07157	-0.824632	-2.81802	0.00501089	0.0396376	-2.49196
ITGA8	1.8639	2.90543	3.13893	0.00178925	0.0191102	-2.49376
CTSK	1.65936	3.92044	3.15067	0.00172016	0.0185566	-2.49406
ST6GALNAC2	1.5003	1.76622	3.06103	0.00231657	0.0228865	-2.49502
FZD8	1.07863	4.10267	3.14497	0.00175339	0.0188652	-2.49757
SH2D1B	-1.74001	0.39289	-2.83379	0.0047737	0.0385083	-2.49912
KIAA1524	-1.4619	2.2814	-2.92535	0.00358685	0.0315704	-2.50002
TBC1D10C	-2.28572	2.74668	-2.90665	0.00380472	0.0327886	-2.50032
MFSD6	0.874219	5.31821	3.14882	0.00173089	0.0186599	-2.50593
MPP2	1.61685	-0.313165	2.93918	0.00343297	0.0307159	-2.50745
RGS7BP	1.73886	1.24572	3.0436	0.00245263	0.0237983	-2.50923
C2CD4A	2.38848	-1.78584	2.9072	0.00379819	0.0327617	-2.50925
C6orf201	-1.53334	-1.04423	-2.79258	0.00541619	0.0417305	-2.50928
TMEM47	1.43682	6.53382	3.12793	0.0018563	0.0195975	-2.51131
PARVG	-1.96594	4.24935	-2.99649	0.00285788	0.0266828	-2.51258
CTAGE1	-1.33726	-1.81693	-2.77546	0.00570536	0.043486	-2.51278
RADIL	1.17933	-0.841137	2.89451	0.00395262	0.0336312	-2.51404
SHQ1	0.538689	3.85268	3.11867	0.00191456	0.0199926	-2.51485
LOC401052	1.1289	-0.402733	2.90981	0.00376704	0.0325618	-2.51553
HAAO	-1.84097	5.19349	-3.06472	0.00228873	0.0226664	-2.51643
NAGK	-0.62087	5.82275	-3.13934	0.00178676	0.0191102	-2.51825
ZDHHC15	1.62007	1.01652	3.01437	0.00269731	0.025579	-2.51894
TEP1	-0.856225	5.02658	-3.10682	0.00199152	0.0205463	-2.52631
PART1	2.58512	-4.56518	2.79973	0.00529933	0.0411606	-2.52723
EXPH5	1.25533	3.27623	3.11821	0.00191749	0.0199976	-2.52822
ZNF610	0.920597	1.53983	2.99963	0.00282904	0.0264439	-2.5291
PMM2	-0.887306	5.42572	-3.11951	0.00190918	0.0199492	-2.52946
AGMAT	-5.41443	4.14982	-2.82777	0.00486308	0.0389979	-2.5316
BICD1	1.12581	3.83134	3.12962	0.00184588	0.0195381	-2.53496
C18orf54	0.761712	2.51792	3.05345	0.00237489	0.0232537	-2.5351
CLDN2	-4.68685	7.28423	-3.00858	0.00274841	0.0258234	-2.53601
SLC7A9	-7.25792	3.30535	-2.74919	0.00617638	0.0459594	-2.53692
KCNQ1	1.11776	4.08843	3.13196	0.00183145	0.0194484	-2.53821
IMPDH2	0.761594	6.43891	3.12962	0.00184584	0.0195381	-2.5398
SMARCD3	1.10106	3.5739	3.11776	0.00192034	0.0200145	-2.54032
TBC1D7	-1.00882	3.59957	-3.00329	0.00279582	0.0261933	-2.54388
ZNF286B	0.939986	0.074905	2.91471	0.00370941	0.0322915	-2.54491
DEPDC1B	-1.90184	0.551036	-2.81679	0.00502987	0.0397491	-2.54532
AKR7L	-2.55385	1.3068	-2.8191	0.00499438	0.0395696	-2.54753
ZNF252P-AS1	-1.98368	-1.64403	-2.74873	0.00618491	0.0460019	-2.54944
AQP4	2.08532	0.931178	3.02778	0.00258245	0.0247342	-2.5499
WNK3	1.42663	-0.786767	2.8965	0.00392799	0.0335164	-2.55091
BTN2A3P	-1.3663	0.615852	-2.83791	0.00471352	0.0380982	-2.55254
LAMA2	1.7678	2.2001	3.08583	0.00213495	0.0216158	-2.55492
GPR174	-2.73052	-0.367697	-2.76064	0.00596689	0.0449335	-2.55892
NAALAD2	1.22992	-0.501035	2.89623	0.00393135	0.0335164	-2.55934
KITLG	1.46482	5.12316	3.12889	0.00185036	0.0195601	-2.5606
PDCD6IP	0.621103	6.9656	3.11746	0.00192232	0.0200223	-2.56081
CYTIP	-1.74143	3.80151	-2.96583	0.00315359	0.0287525	-2.56116
RABGGTB	-0.6516	5.87819	-3.1256	0.00187081	0.0197124	-2.56159
TMEM43	0.632638	7.04	3.11576	0.00193323	0.0200975	-2.56197
CD300A	1.25189	4.2751	3.12853	0.00185257	0.0195708	-2.56199
PUDP	0.677294	4.4606	3.12279	0.00188846	0.019851	-2.56427
C11orf80	0.840835	3.48585	3.09693	0.002058	0.0210063	-2.56781
KLHDC8B	0.691791	4.60118	3.12291	0.00188767	0.019851	-2.57134
MARK1	1.04821	2.24906	3.04044	0.00247808	0.0240309	-2.57184
TBC1D8	0.84379	5.17549	3.12736	0.00185987	0.0196225	-2.57279
LRRC37B	-0.860099	2.56497	-2.94206	0.00340178	0.0305183	-2.57286
LACTB	-0.729139	4.46969	-3.0686	0.00225973	0.0224669	-2.57445
GAS2L3	-3.05478	3.40183	-2.88133	0.00411905	0.0346561	-2.57557
SMPDL3A	-1.45963	6.55241	-3.11693	0.00192566	0.0200315	-2.582
MAPT	-3.92766	5.74649	-2.94687	0.00335012	0.0301733	-2.58296
LILRB1	-1.59796	3.75865	-2.96442	0.00316784	0.0288663	-2.58532
SNX8	-0.865317	4.19862	-3.03786	0.00249901	0.024162	-2.58927
TMEM132C	2.17909	-3.22707	2.807	0.00518295	0.0406634	-2.58945
HS6ST3	2.35118	-1.34409	2.89422	0.0039562	0.0336442	-2.58955
MXD3	-1.49518	2.97757	-2.92062	0.00364087	0.0318766	-2.59096
TGFB1I1	1.2682	4.87662	3.12031	0.00190412	0.0199474	-2.5937
VEZF1	0.652883	6.27356	3.11489	0.0019388	0.0201297	-2.59431
FAM71D	0.817706	-0.730951	2.85525	0.00446728	0.0367267	-2.59435
PNMA1	0.703393	5.7713	3.11838	0.0019164	0.0199976	-2.59555
GCK	1.65892	-2.89764	2.79915	0.00530886	0.041213	-2.59612
EPB41L1	0.870194	6.96281	3.10201	0.0020236	0.0207194	-2.59653
ACVR2B-AS1	0.939329	0.697148	2.92753	0.0035621	0.0314232	-2.59762
MSL3P1	-2.26275	1.34561	-2.81276	0.0050924	0.0401266	-2.59947
SERPINA7	-3.21753	-3.31639	-2.67079	0.0077977	0.0543075	-2.60342
BEAN1	1.63392	-1.3385	2.8607	0.00439236	0.0363644	-2.60498
SOCS5	0.670353	5.14699	3.11548	0.00193503	0.0201034	-2.60835
ZNF831	-2.35585	1.24487	-2.80172	0.00526727	0.0409897	-2.60968
TLDC1	0.511947	4.40706	3.10278	0.00201842	0.02068	-2.61214
HS3ST1	1.10125	3.31104	3.08541	0.00213789	0.0216188	-2.61358
ACSL1	-1.32314	7.88364	-3.11077	0.0019656	0.0203561	-2.61625
BCL9	0.624366	4.39234	3.10296	0.00201725	0.02068	-2.61848
AGAP5	-1.69048	0.677572	-2.80204	0.00526211	0.0409887	-2.61905
MAGI2	0.805301	3.18764	3.06446	0.00229065	0.0226716	-2.61956
ST20	-1.25529	1.54732	-2.85456	0.00447688	0.0367871	-2.62192
PPARD	0.901427	5.86305	3.10626	0.00199523	0.0205715	-2.62541
MIA2	-0.821778	6.1454	-3.10541	0.00200091	0.0206041	-2.62773
RNF26	0.53217	5.60104	3.10854	0.00198021	0.0204672	-2.63015
PILRB	-2.70032	5.46145	-2.98603	0.00295577	0.0273463	-2.63064
ZNF497	0.812941	1.03181	2.92629	0.00357616	0.0315104	-2.63122
FGF18	1.55047	-1.96419	2.81901	0.00499581	0.0395696	-2.63226
TEKT2	1.88828	-0.3596	2.9081	0.00378743	0.0327034	-2.63728
MOGAT3	-6.20547	-0.184154	-2.65908	0.00807038	0.0555547	-2.63781
SMIM5	1.76019	-0.262472	2.90224	0.00385784	0.0330837	-2.63943
CRYM	-4.81204	3.20602	-2.77429	0.00572573	0.0435618	-2.63984
PLCB2	-1.9831	4.33762	-2.95779	0.00323559	0.0293198	-2.64041
SREBF1	-1.09368	6.47579	-3.10183	0.00202481	0.0207194	-2.64059
UVSSA	-1.38338	3.24558	-2.9278	0.00355911	0.0314138	-2.64112
FAM111A	-0.886673	5.56019	-3.08702	0.0021266	0.0215715	-2.64148
MTRR	-0.763646	5.64087	-3.09168	0.00209402	0.0213073	-2.64449
WDR17	-2.39715	2.14463	-2.82493	0.00490576	0.0392244	-2.64813
TOP2B	0.699297	6.53099	3.09357	0.00208103	0.0211883	-2.64851
TMEM245	0.997853	6.92262	3.08306	0.00215456	0.0217066	-2.65022
UCHL1	2.17904	2.57336	3.0815	0.00216569	0.0217918	-2.65103
NUDT15	0.517874	4.44548	3.0903	0.00210364	0.0213919	-2.65261
SCARF2	1.19286	2.99861	3.06213	0.00230824	0.0228319	-2.65748
DOK3	-1.53532	3.59512	-2.93177	0.00351471	0.031106	-2.65827
ZGLP1	-1.95853	-0.554893	-2.73636	0.00641882	0.0469706	-2.66037
TAT	-2.58723	-4.22262	-2.64492	0.0084112	0.0571667	-2.66071
NLRC4	-1.45439	1.96374	-2.85272	0.00450252	0.0369419	-2.66249
AIF1L	2.59814	6.43525	3.0619	0.00230997	0.0228351	-2.66402
ACY1	-1.3228	5.71336	-3.06989	0.00225013	0.0224339	-2.66516
ATP1A3	-3.2171	-0.363264	-2.70497	0.007049	0.0503288	-2.6686
SPATS2	-0.568028	4.89726	-3.06515	0.00228543	0.0226612	-2.6715
STX4	-0.694711	5.79755	-3.08587	0.00213463	0.0216158	-2.67621
KRT80	1.73383	3.07167	3.07472	0.00221463	0.0221764	-2.6824
MYO1C	0.601709	8.25921	3.05754	0.00234325	0.0230384	-2.68361
ADGRB3	1.84757	-1.94338	2.81451	0.00506518	0.03997	-2.68584
TNFAIP1	0.608298	6.53758	3.08189	0.0021629	0.0217772	-2.68693
CNN3	0.723258	8.28644	3.05397	0.00237081	0.0232533	-2.68793
LYG1	-5.12016	3.37191	-2.75071	0.0061481	0.0457907	-2.68868
RGN	-2.12106	3.71422	-2.89266	0.00397564	0.0337041	-2.69143
XCL1	-2.73626	-0.269963	-2.71045	0.00693513	0.0497978	-2.6918
MYOT	-3.97374	-0.519209	-2.67387	0.00772757	0.0539805	-2.6922
FAM47E	1.27067	1.43502	2.96033	0.00320949	0.0291156	-2.69318
TIA1	-0.963742	5.78752	-3.07391	0.00222056	0.0221798	-2.69397
CDS1	1.26551	4.40186	3.08551	0.0021372	0.0216188	-2.69633
SCML2	-1.53715	-0.375793	-2.74011	0.00634721	0.0467702	-2.69921
CA11	1.00096	2.96423	3.03577	0.00251607	0.0242457	-2.70112
THAP10	0.556329	1.87957	2.93853	0.00344009	0.0307314	-2.70305
MLKL	-0.983857	4.4832	-3.01084	0.00272835	0.0256941	-2.70521
IGSF6	-2.04853	3.05904	-2.85938	0.0044104	0.0364058	-2.70997
MCUR1	-0.623034	3.86379	-2.98976	0.00292051	0.0271124	-2.71087
MAPK1IP1L	0.620677	6.70135	3.0717	0.00223678	0.0223266	-2.71092
MURC	-1.30777	-1.55101	-2.70641	0.00701889	0.0501908	-2.71355
CMTM4	1.31741	5.71189	3.07404	0.0022196	0.0221798	-2.71487
HLF	1.68226	4.74102	3.07901	0.00218353	0.0219443	-2.71526
USP45	-0.865846	3.40434	-2.94285	0.0033932	0.0304771	-2.71783
TDP1	0.448113	3.88757	3.04954	0.00240546	0.0234241	-2.71796
CBLC	2.2563	-1.40941	2.84176	0.00465783	0.0378733	-2.71799
RILPL2	0.651182	4.98761	3.07739	0.00219524	0.0220348	-2.72108
WWC2	0.822534	5.89358	3.0747	0.00221479	0.0221764	-2.72233
OTOA	-1.71102	0.250278	-2.74626	0.00623105	0.0462186	-2.72381
DHRS3	-0.988272	7.09295	-3.07688	0.00219893	0.0220582	-2.72624
CORO7	-0.878658	5.27377	-3.0478	0.00241921	0.0235159	-2.73063
ST6GAL1	1.48264	6.70241	3.05185	0.00238733	0.023309	-2.73175
JADE1	0.809945	6.35828	3.06647	0.00227555	0.0225907	-2.73296
PIK3R5	-1.62477	4.02547	-2.92821	0.00355445	0.0313896	-2.73348
EXOC3L4	-3.76067	2.83414	-2.76355	0.00591472	0.0446024	-2.73526
ASPA	-3.89929	3.87687	-2.80395	0.00523152	0.0408479	-2.73559
CDCP1	2.4003	4.40595	3.06875	0.00225858	0.0224669	-2.73777
ARMC3	-3.53292	-1.84512	-2.63425	0.00867662	0.0581686	-2.74242
PDF	-1.2937	3.22661	-2.89457	0.00395182	0.0336312	-2.74304
GRTP1	-1.79232	2.67155	-2.83799	0.00471228	0.0380982	-2.74519
CHMP4C	0.915649	3.68286	3.04906	0.00240923	0.0234469	-2.74563
ZAP70	-2.40896	2.6194	-2.80577	0.00520248	0.0407382	-2.75133
TIGD3	-1.50331	-1.63057	-2.68309	0.00752053	0.0528738	-2.75192
HIST2H2BF	-1.92813	0.813326	-2.74674	0.00622204	0.0461728	-2.75447
ITGB4	1.66996	5.56105	3.05839	0.00233678	0.0229947	-2.755
RFX5	-0.698827	5.44837	-3.05142	0.00239069	0.0233221	-2.75541
LINC01558	1.66661	-2.13784	2.76985	0.00580308	0.0439842	-2.75596
PGAP3	0.699281	5.38934	3.06691	0.00227229	0.0225721	-2.75642
EMX1	-2.94261	2.65859	-2.78292	0.00557773	0.0426728	-2.75656
LINC00908	2.31761	-1.1498	2.84631	0.00459267	0.0374742	-2.75671
KIF14	-1.88042	0.481967	-2.73592	0.00642731	0.0470116	-2.75751
FMNL1	-1.43432	4.99546	-2.99502	0.00287144	0.0267635	-2.7599
KLRG1	-1.21903	0.903496	-2.77726	0.00567438	0.0432903	-2.76356
CCNY	0.574506	6.82356	3.05205	0.00238582	0.023309	-2.76685
UGT1A6	-4.36743	6.73974	-2.91782	0.00367315	0.0320561	-2.76748
C5orf56	-1.11386	2.56587	-2.8571	0.00444177	0.0366092	-2.77032
AAAS	-0.559874	5.05677	-3.038	0.00249789	0.024162	-2.77048
MS4A7	-1.49556	5.755	-3.02952	0.00256788	0.0246816	-2.77098
TMEM125	1.80394	2.76223	3.03886	0.00249089	0.0241121	-2.77107
TCAIM	0.595526	4.84287	3.05848	0.00233605	0.0229947	-2.77245
CR1L	-3.41961	-2.47725	-2.61135	0.0092718	0.0605413	-2.77274
L3HYPDH	-1.02828	2.97798	-2.88492	0.00407311	0.0343696	-2.77402
AAR2	0.379194	5.66013	3.0604	0.0023214	0.0229079	-2.77617
CDC42EP1	0.97927	6.01296	3.05342	0.00237513	0.0232537	-2.77827
SDK1	1.65813	3.94165	3.05705	0.00234702	0.0230559	-2.77947
LRRN1	1.82002	-2.02454	2.77188	0.00576768	0.0437769	-2.78196
EHHADH	-1.69525	6.93094	-3.05243	0.00238286	0.0233014	-2.78371
NELFA	0.575142	4.71879	3.05178	0.00238792	0.023309	-2.78649
KIAA1841	-0.810413	2.62606	-2.87262	0.00423255	0.0353493	-2.78671
SQLE	0.834599	4.19939	3.04565	0.00243626	0.0236675	-2.79001
TBX19	-1.29188	2.16253	-2.82094	0.00496629	0.0394236	-2.79045
QPRT	-2.69786	4.90699	-2.8961	0.00393295	0.0335164	-2.79057
GLTPD2	-5.08319	-0.675819	-2.60758	0.00937325	0.0609597	-2.7906
NLRP6	-3.79203	1.02124	-2.68048	0.00757852	0.0532097	-2.79212
TMEM266	-2.91185	0.240573	-2.67976	0.00759454	0.0532794	-2.79333
FAM35BP	-0.820442	3.74077	-2.94134	0.0034095	0.0305563	-2.79349
KLRK1	-2.31116	2.58581	-2.7927	0.00541427	0.0417305	-2.79383
ALX1	2.07749	-3.65575	2.71088	0.00692626	0.0497684	-2.79615
ANKS4B	-7.48599	2.95203	-2.63278	0.00871373	0.0583215	-2.79628
AHNAK	1.05911	10.6521	2.97605	0.00305197	0.0279667	-2.79698
LOC148709	-2.18888	-1.84662	-2.64217	0.00847906	0.0574167	-2.79708
POLM	-0.846124	4.57657	-2.99227	0.00289697	0.0269552	-2.79728
CELF5	2.48782	-1.89608	2.80077	0.00528259	0.0410502	-2.79782
HOXA3	-1.8517	3.44177	-2.85375	0.00448815	0.0368426	-2.79827
FCGR1CP	-1.99851	1.51828	-2.75554	0.00605948	0.0453585	-2.80064
HIST1H2AE	-3.47517	-0.236773	-2.64667	0.00836844	0.0570276	-2.8049
WAS	-1.69504	3.89126	-2.88814	0.00403223	0.0341306	-2.80494
CYP4X1	1.23482	1.96807	2.95501	0.00326444	0.0295484	-2.80494
C7orf43	-0.974916	3.49017	-2.90643	0.00380735	0.0327886	-2.80866
TMEM79	-0.729446	2.41506	-2.85546	0.00446446	0.0367221	-2.80942
DHRS13	0.947584	3.58277	3.02339	0.00261953	0.0250107	-2.81147
CTDSPL	0.896159	5.9132	3.0442	0.00244779	0.0237654	-2.81149
CDH1	1.96422	6.47517	3.02114	0.00263877	0.0251408	-2.81196
NLRP9	-2.00245	-1.75319	-2.64208	0.00848125	0.0574167	-2.81298
SLC36A1	-1.15149	4.71507	-2.97797	0.00303325	0.0278734	-2.815
OXGR1	2.00206	-3.2018	2.71567	0.00682824	0.049303	-2.81778
TGFA	2.18478	7.0102	3.00733	0.00275952	0.0258979	-2.81946
PMS2P3	-1.30049	1.06194	-2.75861	0.00600361	0.0451475	-2.82218
AQP5	1.70675	-4.66613	2.65772	0.00810241	0.0556846	-2.82295
BTBD16	-3.14311	0.132389	-2.65886	0.00807554	0.0555547	-2.82634
HIST1H2BG	-3.06605	-1.60713	-2.61384	0.00920545	0.0602955	-2.82674
PTCH1	0.857822	3.85892	3.02615	0.00259617	0.0248219	-2.82789
E2F4	-0.50033	5.69615	-3.03611	0.00251331	0.0242457	-2.83038
CTF1	1.20427	2.16142	2.95331	0.00328213	0.0296427	-2.83177
TRIM78P	-1.85549	-0.788055	-2.66587	0.00791136	0.0548649	-2.83363
TNIP3	-3.28742	-1.11864	-2.61771	0.00910304	0.0599191	-2.83538
RAB5A	0.516636	5.6265	3.04015	0.00248039	0.024039	-2.8363
LHFPL2	-1.34017	5.76611	-3.01374	0.00270287	0.0255979	-2.83748
DTX2P1-UPK3BP1-PMS2P11	-1.4931	0.141501	-2.70458	0.00705702	0.050353	-2.8412
PTCHD4	1.43104	1.54072	2.92458	0.00359557	0.0316158	-2.84137
SCRN1	1.54711	6.15102	3.02247	0.0026274	0.0250617	-2.84187
SEMA3B	1.61825	4.02216	3.03569	0.00251676	0.0242457	-2.84361
TJP1	0.737095	6.78821	3.02436	0.00261129	0.0249518	-2.84392
RPL22	0.609397	8.43613	3.00012	0.00282459	0.0264234	-2.84592
PRR26	-2.3572	2.66205	-2.77495	0.00571416	0.0435327	-2.84633
EFNA5	2.46984	3.78815	3.03553	0.00251807	0.0242457	-2.84756
ENO3	-2.19816	0.938397	-2.70489	0.00705054	0.0503288	-2.84868
A1CF	-7.27208	1.71481	-2.58913	0.00988384	0.0630239	-2.84894
TIGIT	-2.82516	1.66856	-2.70851	0.00697518	0.0499878	-2.85151
ALDH4A1	-2.10552	5.98357	-2.98202	0.00299411	0.0276061	-2.85461
CCDC154	-3.40242	-2.63907	-2.57384	0.0103259	0.0647791	-2.85462
HSD3B2	-2.46509	-1.2176	-2.62781	0.0088404	0.0588314	-2.85549
UGT1A8	-5.26299	-0.339606	-2.58352	0.0100441	0.0635771	-2.85633
PDSS1	-0.940835	1.96669	-2.80481	0.00521783	0.0407637	-2.85679
RET	1.50632	-0.428223	2.80186	0.00526504	0.0409897	-2.85838
FIGNL2	-1.99543	2.69837	-2.78934	0.00546984	0.0420247	-2.85983
TTC39C	0.974231	3.08277	2.98677	0.00294869	0.0273118	-2.86005
SP2	0.561294	4.69356	3.02644	0.00259367	0.0248125	-2.86163
ECHDC2	-1.1529	5.77203	-3.01139	0.00272347	0.0256778	-2.86316
ZNF619	0.836157	1.18303	2.85669	0.00444744	0.0366375	-2.86582
MARCH1	-2.03225	2.41674	-2.77338	0.00574144	0.0436387	-2.86685
ZFHX3	0.806915	5.57717	3.02829	0.00257817	0.024722	-2.86869
FAHD1	-0.955468	6.203	-3.02327	0.00262052	0.0250107	-2.87132
LOC283922	-1.44304	1.21992	-2.74315	0.00628949	0.046483	-2.87136
PNMA3	1.84562	2.01024	2.96975	0.00311426	0.0284894	-2.87478
LOC100130691	-0.793184	-0.00674488	-2.71348	0.00687283	0.0495591	-2.87499
SASH3	-1.67274	4.60207	-2.91322	0.00372677	0.0323897	-2.87507
SNORD1C	-1.49374	-0.0176322	-2.68671	0.0074405	0.0524242	-2.87574
ASPDH	-5.40296	-0.321811	-2.57043	0.0104268	0.0650123	-2.8777
LINC01001	-2.01718	-0.540277	-2.64984	0.00829144	0.0566339	-2.87948
CPVL	1.64048	5.93313	3.01156	0.00272202	0.0256778	-2.87951
YAF2	-0.706384	4.27723	-2.9529	0.00328643	0.0296652	-2.88294
ALDH1A1	-1.53785	8.82692	-3.01288	0.00271039	0.0256285	-2.88609
THAP8	-0.823942	2.67275	-2.83652	0.00473366	0.0382231	-2.88643
CCDC88B	-1.91568	3.80654	-2.83928	0.00469353	0.0380632	-2.88758
UGT8	1.56057	3.77382	3.01779	0.00266755	0.0253557	-2.88953
ABHD15	-0.679335	4.49903	-2.96681	0.00314364	0.0286939	-2.88978
ANO1	1.64617	5.60686	3.01266	0.00271236	0.0256322	-2.88985
CTRL	-1.95945	-0.933221	-2.6336	0.00869317	0.0582317	-2.89397
IL18R1	-2.01029	3.10371	-2.79641	0.00535336	0.0414257	-2.89558
ZNF426	0.990448	2.2263	2.92687	0.00356957	0.031472	-2.89891
ELF3	1.89884	6.05005	2.99858	0.00283863	0.0265183	-2.90147
ULK1	0.909138	5.89238	3.01381	0.00270224	0.0255979	-2.90208
RNASE1	1.36511	7.24943	2.9878	0.002939	0.027253	-2.9021
ZNF654	0.65929	4.2838	3.00587	0.00277261	0.0259908	-2.90462
ITGAL	-1.97086	5.1963	-2.92234	0.00362109	0.0317717	-2.90608
GRM5	-3.74686	0.033321	-2.60741	0.00937782	0.0609652	-2.90621
FAM103A1	0.468264	3.68971	2.97671	0.0030455	0.0279443	-2.90634
ITPR3	1.55612	6.45893	2.99543	0.00286761	0.0267583	-2.90684
STEAP1	-2.91873	1.43065	-2.67655	0.00766681	0.0536019	-2.90975
KIF6	1.2161	-0.585253	2.76365	0.00591297	0.0446024	-2.91255
IRF1	-1.21803	6.29373	-3.00591	0.00277217	0.0259908	-2.91381
ETV7	-2.31074	2.82426	-2.75928	0.00599141	0.0450765	-2.91639
KBTBD4	0.721108	4.23855	3.00262	0.00280188	0.026235	-2.9166
CD38	-2.74405	1.04344	-2.66384	0.00795846	0.0550744	-2.91929
MITF	0.897239	5.60527	3.01022	0.00273381	0.0257228	-2.92011
TUSC3	1.42217	4.72744	3.01148	0.00272272	0.0256778	-2.92068
HLA-C	-0.904466	10.717	-2.96236	0.00318869	0.0290076	-2.92123
HK3	-2.03414	2.11345	-2.73748	0.00639735	0.0468907	-2.92229
SESN2	-0.888939	4.70011	-2.95354	0.0032797	0.0296427	-2.92522
APOL6	-0.95477	6.92662	-3.01014	0.00273456	0.0257228	-2.9259
TBXAS1	-1.14567	4.67973	-2.93698	0.00345704	0.0308216	-2.92689
DYRK3	0.722177	3.42224	2.96991	0.00311262	0.0284894	-2.92989
PTGFRN	1.56434	5.89139	2.99429	0.00287816	0.0268108	-2.93595
CDK14	-0.960857	5.4775	-2.98305	0.00298423	0.0275315	-2.93629
CCDC7	-1.88363	-1.72432	-2.59608	0.00968857	0.0623429	-2.93694
F11R	0.724724	7.17009	2.98697	0.00294681	0.0273099	-2.93723
TLR6	-1.62542	0.622449	-2.68209	0.00754256	0.0529831	-2.93762
RPP14	0.538788	4.22432	2.98956	0.00292234	0.0271139	-2.93811
RPL23AP53	0.591068	2.96702	2.93322	0.00349858	0.0310749	-2.93929
ZNF860	0.7996	1.18356	2.82661	0.00488052	0.0390993	-2.94041
ANKRD65	1.16825	1.13875	2.84335	0.00463492	0.0377122	-2.94484
GYPA	-3.90862	-2.65086	-2.5269	0.0117946	0.0705853	-2.94485
DNAJC22	-2.11505	4.25971	-2.83796	0.00471273	0.0380982	-2.9512
IRX2	1.67722	-1.33336	2.73246	0.00649439	0.047396	-2.95372
FAM153B	-4.43051	-0.415987	-2.55829	0.0107933	0.0666096	-2.95401
LOC100133669	-3.22051	-0.711773	-2.57878	0.0101812	0.0642667	-2.96145
SHISA4	0.945505	2.77585	2.93224	0.00350943	0.031093	-2.96281
MYOM1	1.21837	2.00719	2.90103	0.00387252	0.0331573	-2.96785
PRPF38A	0.490092	5.25545	2.99525	0.00286925	0.0267583	-2.96797
TM9SF3	0.542489	7.81859	2.96881	0.00312362	0.028559	-2.96827
CLCN5	-1.5437	6.20956	-2.97665	0.0030461	0.0279443	-2.96956
LILRA2	-1.68712	1.97329	-2.7289	0.00656378	0.047809	-2.97005
CHRNA5	1.28562	-0.570303	2.74595	0.00623685	0.0462406	-2.97094
MSH5	-2.12948	3.48077	-2.77962	0.0056339	0.0430419	-2.97265
ZNF629	0.639916	5.22607	2.99403	0.00288058	0.026818	-2.97271
TXK	-1.77776	0.67593	-2.66401	0.00795459	0.055071	-2.97335
FAM186A	-1.76837	-1.61186	-2.58695	0.00994587	0.0632218	-2.97383
NOD2	-2.05263	1.88127	-2.70504	0.00704748	0.0503288	-2.97538
[truncated: 14,251 more rows]

## Sheet: miRNA_CCPAPvsCCRCC
	R	t.stat	p.value	Col5
hsa-let-7a-1	-0.0454149	-0.94818	0.343564
hsa-mir-200c	0.210199	4.48423	9.37408e-06
hsa-mir-375	0.195535	4.15847	3.86091e-05
hsa-mir-10a	0.189508	4.02545	6.70798e-05
hsa-mir-429	0.152503	3.21835	0.00138575
hsa-mir-200a	0.136777	2.87977	0.00417621
hsa-mir-200b	0.134051	2.82132	0.00500163
hsa-mir-181c	0.12739	2.67876	0.00766959
hsa-mir-203	0.111087	2.33133	0.0201918
hsa-mir-9-1	0.109093	2.28898	0.0225587
hsa-mir-9-2	0.108392	2.27408	0.0234473
hsa-mir-10b	0.0974688	2.0426	0.0416945
hsa-mir-653	0.0824168	1.72481	0.0852726
hsa-mir-582	0.0696737	1.4567	0.145921
hsa-mir-130a	0.0637766	1.33288	0.183269
hsa-let-7b	0.0637151	1.33159	0.183692
hsa-mir-140	0.0619186	1.2939	0.196387
hsa-mir-145	0.0572885	1.19681	0.232031
hsa-mir-127	0.0541951	1.13199	0.258261
hsa-mir-222	0.0508283	1.06148	0.289061
hsa-mir-221	0.0503742	1.05197	0.293396
hsa-mir-218-2	0.0436266	0.910772	0.36292
hsa-mir-30a	0.0436196	0.910626	0.362997
hsa-mir-92b	0.0397309	0.829308	0.407385
hsa-mir-199a-1	0.0383091	0.799586	0.424387
hsa-mir-183	0.0382627	0.798616	0.424949
hsa-mir-199a-2	0.0340253	0.710065	0.478044
hsa-mir-27b	0.0330116	0.688886	0.491262
hsa-mir-379	0.03183	0.664205	0.506911
hsa-mir-134	0.0305693	0.637871	0.523893
hsa-mir-199b	0.0300845	0.627747	0.530499
hsa-mir-335	0.0287138	0.59912	0.549404
hsa-mir-24-2	0.0275942	0.575742	0.565087
hsa-mir-182	0.0227256	0.474103	0.635665
hsa-mir-125a	0.0208079	0.434078	0.664447
hsa-let-7c	0.0195969	0.408804	0.682885
hsa-mir-26a-2	0.0181355	0.378308	0.705387
hsa-mir-143	0.0155455	0.324267	0.745892
hsa-mir-99b	0.010962	0.228644	0.819253
hsa-mir-30d	0.00884	0.18438	0.853801
hsa-mir-27a	0.00565068	0.117856	0.906236
hsa-mir-23b	-0.0058568	-0.122155	0.902832
hsa-mir-425	-0.00778636	-0.162402	0.871064
hsa-mir-30c-2	-0.00853233	-0.177962	0.858835
hsa-mir-126	-0.00861744	-0.179738	0.857442
hsa-mir-30b	-0.0112897	-0.23548	0.813947
hsa-mir-139	-0.0123808	-0.258241	0.796343
hsa-mir-29c	-0.0145395	-0.303277	0.761824
hsa-mir-320a	-0.0151034	-0.315042	0.752881
hsa-mir-210	-0.0165896	-0.346052	0.729471
hsa-mir-99a	-0.0198906	-0.414933	0.678396
hsa-mir-542	-0.0208868	-0.435723	0.663254
hsa-mir-20a	-0.0253898	-0.529716	0.596579
hsa-mir-152	-0.0259144	-0.54067	0.589012
hsa-mir-338	-0.0269348	-0.561974	0.574423
hsa-mir-191	-0.0277841	-0.579708	0.562412
hsa-mir-19b-2	-0.0278682	-0.581462	0.56123
hsa-mir-664	-0.0281079	-0.586468	0.557865
hsa-mir-32	-0.0303284	-0.632841	0.52717
hsa-mir-891a	-0.0378132	-0.789222	0.430412
hsa-let-7e	-0.0382037	-0.797384	0.425663
hsa-mir-144	-0.040709	-0.849758	0.395927
hsa-mir-451	-0.0409312	-0.854403	0.393352
hsa-let-7a-2	-0.0447349	-0.933955	0.350845
hsa-mir-101-2	-0.0450842	-0.941263	0.347093
hsa-mir-92a-2	-0.0465127	-0.971151	0.332013
hsa-mir-26b	-0.0465807	-0.972572	0.331306
hsa-let-7a-3	-0.0472456	-0.986488	0.324442
hsa-mir-195	-0.0505097	-1.05481	0.292098
hsa-mir-23a	-0.050856	-1.06206	0.288797
hsa-mir-21	-0.0517002	-1.07974	0.280858
hsa-mir-34a	-0.0520798	-1.08769	0.277336
hsa-mir-17	-0.0544156	-1.13661	0.256327
hsa-mir-181a-2	-0.0549814	-1.14847	0.251408
hsa-mir-193a	-0.0553254	-1.15567	0.24845
hsa-mir-92a-1	-0.0570074	-1.19092	0.234334
hsa-mir-424	-0.0571461	-1.19383	0.233196
hsa-mir-132	-0.063513	-1.32735	0.185089
hsa-mir-584	-0.0654168	-1.3673	0.172236
hsa-mir-196b	-0.0684921	-1.43188	0.152897
hsa-mir-197	-0.0690927	-1.4445	0.14932
hsa-mir-29a	-0.0697483	-1.45827	0.145488
hsa-mir-339	-0.0725264	-1.51665	0.130081
hsa-let-7f-2	-0.0740291	-1.54825	0.12229
hsa-mir-486	-0.074809	-1.56465	0.118392
hsa-mir-708	-0.0791147	-1.65526	0.0985936
hsa-mir-660	-0.0802965	-1.68014	0.0936478
hsa-mir-452	-0.0829237	-1.73549	0.0833626
hsa-mir-574	-0.0831169	-1.73956	0.0826436
hsa-mir-374a	-0.0867964	-1.81714	0.0698834
hsa-let-7d	-0.0889456	-1.86249	0.0632079
hsa-mir-29b-1	-0.090374	-1.89264	0.0590687
hsa-let-7f-1	-0.0908484	-1.90266	0.0577448
hsa-mir-101-1	-0.0943783	-1.97724	0.0486453
hsa-mir-29b-2	-0.0951235	-1.993	0.0468862
hsa-mir-374b	-0.101059	-2.11861	0.0346898
hsa-let-7i	-0.102069	-2.14	0.0329108
hsa-mir-125b-1	-0.104872	-2.1994	0.0283749
hsa-mir-324	-0.106356	-2.23089	0.0261977
hsa-let-7g	-0.111241	-2.33461	0.0200181
hsa-mir-628	-0.112529	-2.36198	0.0186171
hsa-mir-1307	-0.112979	-2.37155	0.0181479
hsa-mir-2355	-0.113577	-2.38427	0.0175408
hsa-mir-15b	-0.116046	-2.4368	0.0152177
hsa-mir-103-1	-0.116793	-2.45269	0.0145708
hsa-mir-22	-0.119378	-2.50776	0.0125131
hsa-mir-93	-0.121811	-2.55964	0.0108151
hsa-mir-223	-0.121979	-2.56321	0.0107063
hsa-mir-328	-0.12289	-2.58265	0.0101302
hsa-mir-455	-0.123755	-2.6011	0.00960907
hsa-mir-744	-0.124834	-2.62415	0.00899207
hsa-mir-331	-0.126812	-2.66641	0.00795232
hsa-mir-181a-1	-0.130824	-2.75221	0.00616695
hsa-mir-193b	-0.13234	-2.78465	0.00559236
hsa-mir-365-2	-0.132413	-2.78622	0.00556587
hsa-mir-100	-0.133538	-2.81033	0.00517247
hsa-mir-30e	-0.133714	-2.81411	0.00511315
hsa-mir-500a	-0.136575	-2.87544	0.00423272
hsa-mir-365-1	-0.137156	-2.88791	0.00407159
hsa-mir-342	-0.142253	-2.9974	0.00287892
hsa-mir-148b	-0.142862	-3.01051	0.00275994
hsa-mir-196a-2	-0.144117	-3.0375	0.00252907
hsa-mir-98	-0.1448	-3.05222	0.00241077
hsa-mir-150	-0.146829	-3.09591	0.00208891
hsa-mir-155	-0.149448	-3.15239	0.00173144
hsa-mir-505	-0.149842	-3.16089	0.0016828
hsa-mir-15a	-0.150277	-3.17027	0.00163058
hsa-mir-629	-0.150905	-3.18384	0.00155775
hsa-mir-361	-0.156492	-3.30462	0.00102975
hsa-mir-484	-0.160841	-3.39886	0.000739034
hsa-mir-25	-0.165111	-3.49159	0.000529237
hsa-mir-181b-1	-0.169748	-3.59252	0.000364904
hsa-mir-106b	-0.169921	-3.59629	0.000359805
hsa-mir-148a	-0.17285	-3.66016	0.000283027
hsa-mir-625	-0.174716	-3.70092	0.000242386
hsa-mir-128-1	-0.175256	-3.71271	0.0002317
hsa-mir-146b	-0.183166	-3.88598	0.000117796
hsa-mir-151	-0.184993	-3.92611	0.000100347
hsa-mir-196a-1	-0.186943	-3.96897	8.44275e-05
hsa-mir-186	-0.187309	-3.97702	8.17169e-05
hsa-mir-185	-0.187863	-3.98923	7.77651e-05
hsa-mir-16-1	-0.18805	-3.99333	7.64783e-05
hsa-mir-501	-0.190138	-4.03932	6.33682e-05
hsa-mir-423	-0.194818	-4.14262	4.12678e-05
hsa-mir-142	-0.204261	-4.35195	1.6835e-05
hsa-mir-107	-0.206094	-4.39273	1.40764e-05
hsa-mir-28	-0.2269	-4.85912	1.64872e-06
hsa-mir-532	-0.228378	-4.89249	1.40455e-06
hsa-mir-340	-0.230394	-4.9381	1.12654e-06
hsa-mir-215	-0.230504	-4.94059	1.11304e-06
hsa-mir-128-2	-0.230865	-4.94876	1.0697e-06
hsa-mir-204	-0.237651	-5.1028	5.00961e-07
hsa-mir-146a	-0.238611	-5.12466	4.49149e-07
hsa-mir-3607	-0.241179	-5.18319	3.34648e-07
hsa-mir-589	-0.249126	-5.3651	1.31763e-07
hsa-mir-194-1	-0.335145	-7.41907	6.24068e-13
hsa-mir-194-2	-0.336652	-7.45669	4.84804e-13
hsa-mir-378	-0.395525	-8.98173	8.13449e-18
hsa-mir-192	-0.481875	-11.4698	8.65478e-27

## Sheet: miRNA_CCPAPvsNormal
	R	R.1	t.stat.1	p.value.1
hsa-let-7a-1	-0.0454149	-0.0572453	-0.663751	0.50799
hsa-mir-200c	0.210199	0.0413397	0.478951	0.632754
hsa-mir-375	0.195535	0.459529	5.98926	1.82831e-08
hsa-mir-10a	0.189508	0.0835147	0.970141	0.333724
hsa-mir-429	0.152503	-0.120301	-1.40277	0.162997
hsa-mir-200a	0.136777	-0.0522957	-0.606196	0.54541
hsa-mir-200b	0.134051	-0.0754569	-0.875974	0.382612
hsa-mir-181c	0.12739	0.290129	3.50944	0.000612025
hsa-mir-203	0.111087	0.171692	2.01744	0.0456469
hsa-mir-9-1	0.109093	0.1571	1.84143	0.0677695
hsa-mir-9-2	0.108392	0.155288	1.81966	0.071043
hsa-mir-10b	0.0974688	0.0129534	0.149959	0.881022
hsa-mir-653	0.0824168	0.405304	5.13216	9.84475e-07
hsa-mir-582	0.0696737	0.33692	4.14232	6.05208e-05
hsa-mir-130a	0.0637766	0.0151716	0.175644	0.860839
hsa-let-7b	0.0637151	0.252511	3.02092	0.00301907
hsa-mir-140	0.0619186	0.253359	3.03176	0.00291953
hsa-mir-145	0.0572885	0.0807439	0.93774	0.350065
hsa-mir-127	0.0541951	-0.106517	-1.24008	0.217114
hsa-mir-222	0.0508283	0.214483	2.54198	0.0121607
hsa-mir-221	0.0503742	0.0355824	0.412157	0.680883
hsa-mir-218-2	0.0436266	-0.202224	-2.39029	0.0182261
hsa-mir-30a	0.0436196	-0.167369	-1.96516	0.0514644
hsa-mir-92b	0.0397309	0.197036	2.32647	0.0214939
hsa-mir-199a-1	0.0383091	-0.292588	-3.54195	0.000547043
hsa-mir-183	0.0382627	-0.208219	-2.46432	0.0149935
hsa-mir-199a-2	0.0340253	-0.296409	-3.59263	0.000458555
hsa-mir-27b	0.0330116	-0.20982	-2.48414	0.0142194
hsa-mir-379	0.03183	-0.0964641	-1.12188	0.263918
hsa-mir-134	0.0305693	0.0265761	0.307749	0.758751
hsa-mir-199b	0.0300845	-0.299214	-3.62996	0.000402212
hsa-mir-335	0.0287138	-0.318778	-3.89323	0.00015532
hsa-mir-24-2	0.0275942	0.0889537	1.03381	0.303086
hsa-mir-182	0.0227256	-0.135665	-1.58509	0.115303
hsa-mir-125a	0.0208079	-0.117707	-1.37209	0.172327
hsa-let-7c	0.0195969	-0.0411721	-0.477006	0.634135
hsa-mir-26a-2	0.0181355	-0.0945106	-1.09896	0.273757
hsa-mir-143	0.0155455	0.125026	1.45873	0.146981
hsa-mir-99b	0.010962	0.0575796	0.66764	0.505512
hsa-mir-30d	0.00884	-0.174717	-2.0541	0.0419106
hsa-mir-27a	0.00565068	0.0894149	1.03921	0.300576
hsa-mir-23b	-0.0058568	-0.191734	-2.26144	0.0253431
hsa-mir-425	-0.00778636	0.04813	0.557792	0.577917
hsa-mir-30c-2	-0.00853233	-0.0969207	-1.12725	0.261653
hsa-mir-126	-0.00861744	0.19908	2.35159	0.0201507
hsa-mir-30b	-0.0112897	-0.22654	-2.69238	0.00800004
hsa-mir-139	-0.0123808	-0.437184	-5.627	1.02848e-07
hsa-mir-29c	-0.0145395	-0.195346	-2.30572	0.022662
hsa-mir-320a	-0.0151034	0.164165	1.92649	0.0561606
hsa-mir-210	-0.0165896	0.377293	4.71603	5.95897e-06
hsa-mir-99a	-0.0198906	-0.357927	-4.43728	1.8841e-05
hsa-mir-542	-0.0208868	-0.0150357	-0.17407	0.862073
hsa-mir-20a	-0.0253898	0.065758	0.762855	0.446891
hsa-mir-152	-0.0259144	-0.0417314	-0.483498	0.629532
hsa-mir-338	-0.0269348	0.0959413	1.11575	0.266527
hsa-mir-191	-0.0277841	-0.0962125	-1.11893	0.265171
hsa-mir-19b-2	-0.0278682	0.0242361	0.280636	0.779422
hsa-mir-664	-0.0281079	0.00304254	0.0352201	0.971957
hsa-mir-32	-0.0303284	-0.0388175	-0.449683	0.653665
hsa-mir-891a	-0.0378132	-0.819817	-16.5729	2.99956e-34
hsa-let-7e	-0.0382037	-0.268981	-3.23282	0.00154315
hsa-mir-144	-0.040709	0.0269226	0.311764	0.755704
hsa-mir-451	-0.0409312	0.00540963	0.062622	0.950161
hsa-let-7a-2	-0.0447349	-0.0560872	-0.65028	0.516624
hsa-mir-101-2	-0.0450842	0.00582495	0.0674298	0.94634
hsa-mir-92a-2	-0.0465127	-0.0790509	-0.917953	0.360293
hsa-mir-26b	-0.0465807	-0.0612984	-0.710917	0.478371
hsa-let-7a-3	-0.0472456	-0.0616399	-0.714893	0.475919
hsa-mir-195	-0.0505097	-0.00586629	-0.0679084	0.94596
hsa-mir-23a	-0.050856	0.0528536	0.612681	0.541125
hsa-mir-21	-0.0517002	0.296263	3.59069	0.000461676
hsa-mir-34a	-0.0520798	0.176061	2.0704	0.0403347
hsa-mir-17	-0.0544156	0.0479097	0.555232	0.579662
hsa-mir-181a-2	-0.0549814	0.0394037	0.456485	0.64878
hsa-mir-193a	-0.0553254	0.191789	2.26211	0.0253003
hsa-mir-92a-1	-0.0570074	0.0336117	0.389303	0.69767
hsa-mir-424	-0.0571461	-0.003031	-0.0350865	0.972063
hsa-mir-132	-0.063513	-0.143924	-1.68357	0.0945932
hsa-mir-584	-0.0654168	0.250883	3.00013	0.00321877
hsa-mir-196b	-0.0684921	-0.0124042	-0.1436	0.886032
hsa-mir-197	-0.0690927	0.0778058	0.903406	0.367932
hsa-mir-29a	-0.0697483	-0.332621	-4.08285	7.60708e-05
hsa-mir-339	-0.0725264	-0.0358907	-0.415732	0.678271
hsa-let-7f-2	-0.0740291	-0.0794392	-0.92249	0.357931
hsa-mir-486	-0.074809	-0.110194	-1.2834	0.201567
hsa-mir-708	-0.0791147	-0.0198246	-0.229532	0.818806
hsa-mir-660	-0.0802965	-0.578636	-8.21273	1.60695e-13
hsa-mir-452	-0.0829237	0.144298	1.68804	0.0937292
hsa-mir-574	-0.0831169	-0.035594	-0.412292	0.680784
hsa-mir-374a	-0.0867964	0.127204	1.48455	0.140012
hsa-let-7d	-0.0889456	-0.0630619	-0.73145	0.465782
hsa-mir-29b-1	-0.090374	-0.267238	-3.21025	0.00166008
hsa-let-7f-1	-0.0908484	0.0439004	0.508674	0.611817
hsa-mir-101-1	-0.0943783	-0.110774	-1.29024	0.199189
hsa-mir-29b-2	-0.0951235	-0.276543	-3.33112	0.00111787
hsa-mir-374b	-0.101059	-0.218841	-2.5962	0.0104776
hsa-let-7i	-0.102069	0.132265	1.54465	0.12479
hsa-mir-125b-1	-0.104872	-0.555083	-7.72493	2.3361e-12
hsa-mir-324	-0.106356	-0.218794	-2.59561	0.0104947
hsa-let-7g	-0.111241	-0.369896	-4.60874	9.33116e-06
hsa-mir-628	-0.112529	-0.0501678	-0.581466	0.561903
hsa-mir-1307	-0.112979	-0.143338	-1.67657	0.0959589
hsa-mir-2355	-0.113577	0.313162	3.81712	0.000205483
hsa-mir-15b	-0.116046	-0.0383668	-0.444455	0.657431
hsa-mir-103-1	-0.116793	-0.020501	-0.237367	0.812735
hsa-mir-22	-0.119378	-0.38499	-4.82878	3.69327e-06
hsa-mir-93	-0.121811	0.126132	1.47183	0.14341
hsa-mir-223	-0.121979	0.023242	0.269119	0.788252
hsa-mir-328	-0.12289	-0.175246	-2.06051	0.0412849
hsa-mir-455	-0.123755	-0.246062	-2.93873	0.0038819
hsa-mir-744	-0.124834	-0.234129	-2.78772	0.00608025
hsa-mir-331	-0.126812	-0.0795634	-0.923942	0.357177
hsa-mir-181a-1	-0.130824	-0.0510805	-0.592072	0.5548
hsa-mir-193b	-0.13234	-0.445126	-5.75421	5.64547e-08
hsa-mir-365-2	-0.132413	-0.0367734	-0.425971	0.670813
hsa-mir-100	-0.133538	-0.435726	-5.60383	1.14626e-07
hsa-mir-30e	-0.133714	-0.310272	-3.77812	0.00023681
hsa-mir-500a	-0.136575	-0.572588	-8.0847	3.26089e-13
hsa-mir-365-1	-0.137156	-0.0507229	-0.587917	0.557578
hsa-mir-342	-0.142253	0.143308	1.67621	0.0960295
hsa-mir-148b	-0.142862	-0.0454326	-0.526464	0.599436
hsa-mir-196a-2	-0.144117	-0.243164	-2.90193	0.0043373
hsa-mir-98	-0.1448	-0.179752	-2.11523	0.036261
hsa-mir-150	-0.146829	-0.180095	-2.1194	0.0359011
hsa-mir-155	-0.149448	0.0401654	0.465324	0.642455
hsa-mir-505	-0.149842	-0.219693	-2.60682	0.0101736
hsa-mir-15a	-0.150277	0.17709	2.08289	0.0391621
hsa-mir-629	-0.150905	0.105889	1.23269	0.219851
hsa-mir-361	-0.156492	-0.238854	-2.84734	0.00510347
hsa-mir-484	-0.160841	-0.0105828	-0.122512	0.902677
hsa-mir-25	-0.165111	0.0977669	1.13718	0.257492
hsa-mir-181b-1	-0.169748	-0.0192827	-0.223255	0.823677
hsa-mir-106b	-0.169921	0.113374	1.32091	0.188783
hsa-mir-148a	-0.17285	-0.371795	-4.63618	8.32541e-06
hsa-mir-625	-0.174716	-0.108586	-1.26445	0.208263
hsa-mir-128-1	-0.175256	-0.420022	-5.35761	3.57138e-07
hsa-mir-146b	-0.183166	-0.121045	-1.41157	0.160394
hsa-mir-151	-0.184993	-0.16137	-1.8928	0.0605407
hsa-mir-196a-1	-0.186943	-0.214258	-2.53918	0.0122539
hsa-mir-186	-0.187309	-0.0852602	-0.990565	0.323683
hsa-mir-185	-0.187863	-0.235532	-2.80541	0.00577396
hsa-mir-16-1	-0.18805	-0.0229452	-0.26568	0.790894
hsa-mir-501	-0.190138	-0.547709	-7.57789	5.17696e-12
hsa-mir-423	-0.194818	-0.13935	-1.62898	0.105665
hsa-mir-142	-0.204261	-0.128101	-1.4952	0.137214
hsa-mir-107	-0.206094	-0.408123	-5.17496	8.13742e-07
hsa-mir-28	-0.2269	0.0881161	1.024	0.30768
hsa-mir-532	-0.228378	-0.730914	-12.3975	5.47192e-24
hsa-mir-340	-0.230394	-0.0813902	-0.945296	0.346209
hsa-mir-215	-0.230504	-0.53234	-7.27945	2.55727e-11
hsa-mir-128-2	-0.230865	-0.488384	-6.47864	1.62299e-09
hsa-mir-204	-0.237651	-0.785472	-14.6914	1.04089e-29
hsa-mir-146a	-0.238611	-0.342215	-4.21598	4.54504e-05
hsa-mir-3607	-0.241179	-0.516349	-6.97959	1.24007e-10
hsa-mir-589	-0.249126	-0.410592	-5.2126	6.87684e-07
hsa-mir-194-1	-0.335145	-0.632476	-9.45213	1.46813e-16
hsa-mir-194-2	-0.336652	-0.639482	-9.62861	5.32999e-17
hsa-mir-378	-0.395525	-0.606105	-8.82111	5.33374e-15
hsa-mir-192	-0.481875	-0.673982	-10.561	2.41922e-19

## Sheet: tonEBP Targets
	log2FC_vs_normal	adj.P.Val_vs_normal	log2FC_vs_ccRCC	adj.P.Val_vs_ccRCC
NFAT5	-0.741632	0.0135538	0.0728092	0.882928
AKR1B1	1.13644	0.231908	1.33458	0.0762504
SLC5A3	-2.42506	1.44167e-05	-0.392205	0.660667
SLC6A12	-1.70538	0.0212925	-0.646262	0.535016
SLC6A6	-0.984511	0.00502497	-0.596418	0.296524
HSPA1A	-0.653702	0.050203	-0.0242315	0.975649
AQP2	-10.6769	8.00671e-08	3.85237	0.00158691

## Sheet: mtDNA Dysfunction Genes
	V1
1	PPARGC1A
2	PPARGC1B
3	ESRRA
4	ESRRB
5	GABPA
6	GABPB1
7	GABPB2
8	NRF1
9	YY1
10	POLG
11	POLG2
12	TFAM
13	LRPPRC
14	PEO1
15	SUCLA2
16	SUCLG1
17	DGUOK
18	TK2
19	RRM2B
20	OPA1
21	MPV17
22	ANT1
23	TYMP
24	FBXL4
25	RNASEH1
26	TFB1M
27	TFB2M
28	DNA2
29	MGME1
30	ABAT
31	MFN2
32	FEN1
33	PRIMPOL
34	mtRNAP
35	SSBP1
36	TOP2B
37	C10orf2
