# Supplementary material for: Abnormal oxidative metabolism in a quiet genomic background underlies clear cell papillary renal cell carcinoma
Source: eLife. 2019 Apr 1;8:e38986. doi: 10.7554/eLife.38986 (PMC6459676; doi:10.7554/eLife.38986)
Supplement: Figure 3—source data 2. [file elife-38986-fig3-data2.xlsx]

## Sheet: CCPAPvsNormal_Hallmarks
	es	nes	pval	fdr	gene_set_size	matched_size	genes
HALLMARK_ADIPOGENESIS	-0.460166	-2.39627	0	0	200	189	LAMA4, ANGPTL4, SLC27A1, SSPN, ACLY, COL4A1, UBC, PTRF, ITGA7, SCARB1, ARL4A, CDKN2C, SPARCL1, CCNG2, ALDOA, COL15A1, CD151, MGLL, VEGFB, BCL6, RAB34, SQRDL, PDCD4, C3, MYLK, STOM, ESYT1, IFNGR1, PGM1, LTC4S, ENPP2, RIOK3, FZD4, PEX14, PFKL, JAGN1, CD36, TOB1, YWHAG, SDPR, TKT, DHRS7B, SORBS1, PHLDB1, HSPB8, SNCG, OMD, ANGPT1, UCP2, DNAJC15, ADCY6, ITSN1, PQLC3, BAZ2A, UCK1, CD302, ADIPOQ,PPP1R15…
HALLMARK_PEROXISOME	-0.473457	-2.23244	0	0	104	99	STS, PABPC1, CRABP2, CNBP, ATXN1, TSPO, SIAH1, FABP6, VPS4B, YWHAH, TOP2A, CDK7, ERCC3, ABCB9, ACSL5, BCL10, MSH2, PEX14, ELOVL5, FADS1, HRAS, ERCC1, FDPS, CTBP1, CLN6, SLC23A2, DLG4, MVP, PEX6, NR1I2, ABCD2, SMARCC1, ABCD1, SLC35B2, PRDX5, DHCR24,SLC25A17, SEMA3C, PEX11A, HSD3B7,HSD17B11, GNPAT,SLC25A19, CRABP1, PEX11B, ALB, DIO1,ITGB1BP1, CACNA1B, PEX5, FIS1, HAO2, ABCB4, SULT2B1, PEX2, NUDT19,…
HALLMARK_OXIDATIVE_PHOSPHORYLATION	-0.656042	-3.4706	0	0	200	198	CYB5R3, BAX, LDHA, TCIRG1, TIMM9, PHB2, ABCB7, GPI, HTRA2, OXA1L, ATP5G2, MRPL11, CASP7, SLC25A6, POLR2F, TIMM10, NDUFA7, VDAC2, NDUFS4, TOMM22, ATP6AP1, PDK4, ATP5D, TIMM8B, BCKDHA, MGST3, NDUFB7, SDHA, ACADVL, VDAC1, NDUFB4, RHOT1, VDAC3,SLC25A12, RHOT2, NDUFA8, MAOB, COX5B,ATP6V1G1, IDH3G, NDUFA1, ATP5O, TIMM50, ISCA1, COX17, TIMM13, COX6B1, COX6C, COX7C, UQCRB, NDUFC1, RETSAT, UQCRH, COX7A2, …
HALLMARK_WNT_BETA_CATENIN_SIGNALING	0.630368	2.0568	0	0	42	40	HEY2, PPARD, JAG2, NCSTN,CSNK1E, HEY1, TP53,NOTCH4, DVL2, JAG1,CTNNB1,ADAM17, CCND2, RBPJ, TCF7,NOTCH1, NCOR2, WNT6, AXIN1, FZD8, DLL1, LEF1, MAML1, MYC, FZD1, CUL1, DKK1, HDAC2, HDAC5, SKP2, KAT2A,HDAC11, GNAI1, AXIN2, WNT5B, PTCH1, FRAT1, NUMB, PSEN2, NKD1
HALLMARK_HYPOXIA	0.5155	2.17017	0	0	200	191	INHA, PGF, HK2, SAP30, STC2, IRS2, EFNA3, SLC2A1, P4HA1, VEGFA, CP, PRKCDBP, PKP1, IGFBP3, TMEM45A, ANGPTL4, ALDOC, ENO2, MXI1, PYGM, PDK1, PFKP, ANXA2, PAM, ETS1, TPI1, ADM, NDRG1, VLDLR, CXCR4, GAPDH, CAV1, ISG20, PTRF, TGFB3, KDM3A, WISP2, TGFBI, B3GALT6, COL5A1, LDHA, DDIT4, PLAUR, IDS, TPBG, SCARB1, STBD1, PGK1, CHST3, BGN, ADORA2B, CHST2, SLC2A3, RBPJ, PHKG1, NR3C1, LXN, PPFIA4, LOX, GYS1, …
HALLMARK_HEDGEHOG_SIGNALING	0.621967	2.01729	0	0	36	35	HEY2, VEGFA, PML, SCG2, HEY1, VLDLR, TLE1, NRP2, CRMP1, ETS2, GLI1,DPYSL2, NRP1, CDK6,CELSR1, MYH9, THY1, NF1, UNC5C, AMOT, ACHE, SLIT1, L1CAM, TLE3, RASA1, PTCH1,CDK5R1,NKX6-1, PLG, LDB1, OPHN1, RTN1, CNTFR, SHH, NRCAM
HALLMARK_FATTY_ACID_METABOLISM	-0.563724	-2.84592	0	0	158	151	ENO2, CBR3, CD1D, APEX1, LGALS1, NCAPH2, LDHA, IL4I1, ALDOA, XIST, H2AFZ, MGLL, UBE2L6, MIF, YWHAH, PTPRG, OSTC, ACSL5, TDO2, S100A10, LTC4S, METAP1, CPOX, ELOVL5, ADSL, NSDHL, CD36, AOC3, PRDX6, VNN1, NBN, INMT, GPD2, FASN, PSME1, DHCR24, NTHL1, HSD17B11, SERINC1, UGDH, SDHA, UROD, ACADVL, FABP1, TP53INP2, CYP4A11, SMS, FMO1, GLUL, CCDC58, HAO2, CYP4A22, GPD1, ADIPOR2, IDH3G, RDH16, CEL, RETSAT,…
HALLMARK_EPITHELIAL_MESENCHYMAL_TRANSITION	0.554647	2.34137	0	0	200	195	PTHLH, PDLIM4, COL5A3, CTHRC1, LAMA3, LOXL2, VEGFA, QSOX1, TGFB1, IGFBP3, COL8A2, COL11A1, EFEMP2, GJA1, SCG2, ENO2, VIM, MCM7, COL5A2, FOXC2, BMP1, COL4A1, SERPINH1, COL4A2, TPM1, PMEPA1, MSX1, FAP, PLOD1, NNMT, ITGB1, SDC1, ITGA5, LGALS1, PMP22, PLOD3, TGFBI, COL6A2, SPARC, COL5A1, LAMC1, PLAUR, CD44, PDGFRB, SLIT3, BGN, MMP14, LRRC15, TIMP1, MATN3, FSTL1, VEGFC, FN1, BDNF, COL1A2, COL1A1, PCOL…
HALLMARK_XENOBIOTIC_METABOLISM	-0.437831	-2.28566	0	0	200	189	PPARD, TGFB2, XDH, SLC12A4, ETS2, ABCC3, SMOX, FAS, DDAH2, GSTT2, ATP2A2, BCAT1, SHMT2, FMO3, DHPS, TNFRSF1A, TDO2, TMEM97, PSMB10, CYP2J2, SERPINE1, EPHA2, ARPP19, SERTAD1, ELOVL5, AP4B1, CYP2C18, NPC1, CFB, CD36, PTGES3, LCAT, KARS, UPP1, PDLIM5, ID2, IL1R1, VNN1, PROS1, IGFBP1, SPINT2, IGFBP4, PYCR1, CNDP2, CRP, AQP9, IRF8, CDA, ABCD2, ACSM1, COMT, HMOX1, ITIH1, PEMT, ITIH4, MT2A, CSAD, ARG1, …
HALLMARK_BILE_ACID_METABOLISM	-0.525681	-2.52006	0	0	112	104	FDXR, EFHC1, ATXN1, ABCA2, ACSL5, ABCA3, AKR1D1, NPC1, FADS2, FADS1, SLC23A2, DIO2, RXRA, SLC29A1, ABCG4, NEDD4, PEX6, AQP9, ABCA4, NR1I2, ABCD2, RBP1, ABCD1, SLC35B2, PRDX5, DHCR24, LCK, HSD17B6, PEX11A, HSD3B7,HSD17B11, GNPAT, CYP8B1, CH25H, CYP46A1, ABCA8,SLC22A18, DIO1, LIPE, CYP27A1, AR, PIPOX, OPTN, PEX19, SULT2B1, SLC23A1, AGXT, GC, PEX16, ABCA9, BMP6, APOA1, BBOX1, SLC27A5, RETSAT, SLC27A…
HALLMARK_ALLOGRAFT_REJECTION	0.491208	2.05434	0	0	200	185	ST8SIA4, HLA-G, CDKN2A, CD47, DYRK3, DARS, CCND3, CD40, TGFB1, INHBB, NOS2, EIF3D, NPM1, IL4R, GCNT1, CD1D, MMP9, IFNAR2, ETS1, RPS19, TGFB2, TAPBP, IFNGR2, GBP2, LCP2, GALNT1, ELF4, TIMP1, BRCA1, NCK1, DEGS1, CSK, CCND2, FLNA, ITGB2, SOCS5, HLA-E, HCLS1, INHBA, LY75, LYN, AKT1, RPS9, IL2RB, TAP1, EGFR, FAS, LY86, F2R, STAB1, CCL5, IRF7, GZMB, RIPK2, IL12RB1, RPS3A, PRF1, SPI1, HLA-A, RPL9, BCAT1…
HALLMARK_APICAL_JUNCTION	0.47124	1.97166	0	0.0001429	200	185	COL17A1, CDSN, CDH8, ADRA1B, LAMA3, CD276, LAMB3, LAYN, FSCN1, SGCE, SORBS3, MMP9, GNAI2, ITGB4, PECAM1, MDK, THBS3, BMP1, MPZL2, NLGN2, ITGB1, JAM3, CD34, TGFBI, CERCAM, SHC1, PTEN, EVL, ALOX15B, ADAMTS5, ZAK, TRO, VWF, ARHGEF6, ICAM2, CDH3, EXOC4, ITGA3, RSU1, ITGA10, ACTN1, CALB2, IRS1, CX3CL1, PBX2, ACTG2, MSN, LAMC2, RRAS, VCAN, EGFR, ADAM9, VASP, CLDN7, PARVA, PIK3R3, CD99, ZYX, GTF2F1, MAP…
HALLMARK_P53_PATHWAY	0.452774	1.87179	0	0.0001905	200	192	KRT17, TGFA, CDKN2A, PVT1, DDB2, IER5, DGKA, CCND3, TGFB1, INHBB, FDXR, SFN, RHBDF2, JAG2, RAP2B, CDKN2B, PHLDA3, ITGB4, PTPRE, CDH13, PLK2, AEN, RPL18, NDRG1, PRMT2, FGF13, GM2A, CD81, TP53, SDC1, BAX, RALGDS, RPL36, ALOX15B, DDIT4, PLK3, PPM1D, TM4SF1, ZNF365, TRIAP1, CASP1, TRIB3, PROCR, PDGFA, CCND2, CTSD, BMP2, FBXW7, RPS12, PERP, RB1, ERCC5, ADA, NOTCH1, TAP1, RPS27L, FAS, PITPNC1, F2R, DNT…
HALLMARK_INTERFERON_ALPHA_RESPONSE	0.48814	1.87944	0	0.0002144	97	94	CD47, RTP4, TRIM21, IL4R, BST2, FAM46A, ISG20,LGALS3BP, GBP2, IFI44, IFI44L, LPAR6, CASP1, IFITM1, PROCR, IFITM3, OGFR, IFITM2, ISG15, IRF9, TAP1, TRIM25, CCRL2, PSMB8, UBE2L6, IRF7, RIPK2, SAMD9, LY6E,SLC25A28, CASP8, MX1, IFI27, RSAD2, ELF1, LAMP3, B2M, OASL, NMI, CMPK2, RNF31, IRF2, SP110, PSMB9, GBP4, UBA7, STAT2, PARP9, CSF1, HLA-C, DDX60, PLSCR1, EPSTI1, HERC6, TRIM14, TMEM140, IFIT3, IFIH1…
HALLMARK_E2F_TARGETS	0.450064	1.89206	0	0.000245	200	198	CDKN2A, RFC2, LIG1, MCM7, KIF4A, PA2G4, NAP1L1, PRDX4, RPA1, MCM5, TP53, SUV39H1, MYBL2, PSMC3IP,RNASEH2A, PPM1D, BRCA1, CDKN2C, SSRP1, ASF1B, MCM2, HNRNPD, TUBB, MELK, LYAR, CKS1B, CCNB2, PLK4, DCLRE1B, MKI67, PTTG1, SNRPB, H2AFZ, GINS3, ING3, AURKB, MCM6, ATAD2, DEPDC1, POP7, CENPM, POLE4, KIF18B, TCF19, BRCA2, DLGAP5, DEK, WEE1, RRM2, HMGB2, TOP2A, TRIP13, WDR90, NASP, RANBP1, CDCA8, PLK1, EXO…
HALLMARK_INFLAMMATORY_RESPONSE	0.440775	1.84634	0	0.0005145	200	187	RTP4, CD40, SLC7A1, SCARF1, PTAFR, EDN1, CALCRL, NMUR1, IL4R, HRH1, BST2, PTPRE, ADM, TAPBP, ITGA5, RELA, IFNGR2, BDKRB1, PLAUR, PTGIR, LCP2, TPBG, AXL, OSMR, MMP14, TIMP1, ADORA2B, CHST2, AHR, IFITM1, RHOG, KCNJ2, TNFAIP6, CD55, GNAI3, INHBA, CX3CL1, CCL20, LYN, MET, PIK3R5, APLNR, IL2RB, IL15RA, CCRL2, STAB1, CCL5, SLC7A2, IRF7, RIPK2, CCL17, IFNAR1, EMP3, SCN1B, LY6E, ATP2A2, GPR132, BEST1, CL…
HALLMARK_GLYCOLYSIS	0.417978	1.75592	0	0.0017929	200	192	GPR87, SPAG4, TGFA, EGLN3, HK2, SAP30, LHX9, NOL3, STC2, IRS2, ARTN, EFNA3, P4HA1, VEGFA, QSOX1, IGFBP3, PYGL, ANGPTL4, SLC16A3, ENO2, MXI1, PFKP, PAM, TPI1, VLDLR, CHPF, CXCR4, PLOD1, XYLT2, ISG20, SDC1, TGFBI, B3GAT3, B3GALT6, AGRN, COL5A1, LDHA, DDIT4, ANG, TPBG, CD44, PGK1, SOX9, DSC2, ADORA2B, CHST2, CLDN3, PPFIA4, GUSB, GYS1, KIF20A, CHPF2, PLOD2, ALDOA, MET, CACNA1H, EXT2, VCAN, EGFR, DEPD…
HALLMARK_MYOGENESIS	0.416029	1.73977	0	0.0020008	200	177	DAPK2, STC2, PTP4A3, FXYD1, TGFB1, IGFBP3, CHRNA1, EFS, SORBS3, PYGM, SSPN, DMD, ITGB4, RIT1, FKBP1B, MEF2C, SGCA, CDH13, COL4A2, CHRNB1, TNNI2, MEF2D, LSP1, ITGB1, HRC, GSN, TNNT1, ITGA7, COL6A2, SPARC, AGRN, MYL4, SMTN, BDKRB2, IGFBP7, MYO1C, TPM3, COL1A1, PPFIA4, PDLIM7, RB1, KLF5, TPM2, NOTCH1, COL15A1, CNN3, CACNA1H, CLU, APLNR, TEAD4, COL3A1, TNNT3, WWTR1, PPP1R3C, ADAM12, MYH9, SYNGR2, AEB…
HALLMARK_INTERFERON_GAMMA_RESPONSE	0.412524	1.73718	0	0.0020447	200	196	ST8SIA4, HLA-G, RTP4, IDO1, CD40, PML, TRIM21, IL4R, BST2, SSPN, PFKP, CASP4, IFNAR2, TAPBP, ISG20,LGALS3BP, IFI44, LCP2, IFI44L, TOR1B, ARL4A, P2RY14, CASP1, IFITM3, OGFR, IFITM2, TNFAIP6, IL18BP, AUTS2, NOD1, CSF2RB, ISG15, IRF9, IL2RB, IL15RA, TAP1, TRIM25, FAS, PTPN2, OAS3, PSMB8, CCL5, UBE2L6, IRF7, RIPK2, FCGR1A, OAS2, VAMP5, LY6E,SLC25A28, EIF4E3, MYD88, CASP8, ZNFX1, HLA-A, PELI1, MX1, PT…
HALLMARK_G2M_CHECKPOINT	0.404907	1.71301	0	0.0022049	200	197	SAP30, AMD1, CCND1, SLC7A1, TGFB1, PML, E2F1, DMD, KIF4A, EFNA5, GINS2, MCM5, CHAF1A, SUV39H1, CDC45, MYBL2, PRC1, SLC7A5, ZAK, CDKN2C, CDC6, UBE2C, MCM2, HNRNPD, HMGN2, MARCKS, CKS1B, KIF20B, SNRPD1, CCNB2, PLK4, NDC80, MKI67, PTTG1, PAPD7, E2F2, H2AFZ, EXO1, AURKB, MCM6, TPX2, TTK, CBX1, SLC38A1, TRAIP, CENPF, BRCA2, CDC27, CCNA2, TOP2A, NASP, NCL, PBK, PLK1, BIRC5, ILF3, DKC1, KIF15, EZH2,HIST…
HALLMARK_ANGIOGENESIS	0.521023	1.65947	0.0073964	0.0042302	36	34	VEGFA, JAG2, PRG2, COL5A2, MSX1, JAG1, TIMP1, FSTL1, PDGFA, CCND2, NRP1, VCAN, COL3A1, KCNJ8, PTK2, S100A4, POSTN, OLR1, SLCO2A1, THBD, CXCL6, APP, STC1, LRPAP1, VAV2, FGFR1, LUM, VTN, APOH, ITGAV, LPL, SPP1,SERPINA5,TNFRSF21
HALLMARK_REACTIVE_OXIGEN_SPECIES_PATHWAY	-0.411491	-1.6391	0.0037879	0.0057385	49	46	PFKP,PDLIM1, PRDX4, LSP1, FES, HHEX, SBNO2, OXSR1, STK25, PRDX6, JUNB,CDKN2D, ABCC1, EGLN2, SCAF4, PRNP, G6PD,NDUFB4, FTL, TXN, SRXN1, PRDX2, MPO, NQO1, MBP, ATOX1, MSRA, ERCC2, GPX3, HMOX2, GPX4, MGST1, GCLC, GLRX2, SOD1, GCLM,IPCEF1, SOD2,NDUFA6,TXNRD2, GLRX,NDUFS2, PRDX1,TXNRD1, GSR, CAT
HALLMARK_UV_RESPONSE_DN	0.401549	1.6269	0.0011779	0.0058415	144	142	SLC7A1, COL11A1, APBB2, GJA1, PTPRM, GCNT1, GRK5, CELF2, ANXA2, COL5A2, RUNX1, ANXA4, VLDLR, CAV1, EFEMP1, MMP16, PMP22, PTEN, MTA1, LAMC1, PDGFRB, PIAS3, ADORA2B, ATP2B4, KCNMA1, BDNF, COL1A2, COL1A1, NR3C1, ATXN1, FYN, IRS1, NRP1, INPP4B, PAPD7, MET, MAP1B, PIK3R3, COL3A1, MGLL, PTGFR, PIK3CD, NFIB, DLC1, MAP2K5, RND3, IGFBP5, RBPMS, CACNA1A, BHLHE40, NOTCH2, RGS4, MYC, FHL2,SERPINE1, ATP2B1, I…
HALLMARK_NOTCH_SIGNALING	0.502015	1.58256	0.0173661	0.0103401	32	32	SAP30, CCND1, PPARD, NOTCH3, HEYL, DTX2, JAG1, TCF7L2, NOTCH1, APH1A, DLL1, DTX4, NOTCH2, FZD7, FZD1, CUL1, MAML2, LFNG, RBX1, KAT2A, PSENEN, ARRB1, HES1, SKP1, FZD5, WNT5A, DTX1, PRKCA, PSEN2, WNT2, FBXW11,ST3GAL6
HALLMARK_PROTEIN_SECRETION	-0.326692	-1.56328	0	0.0120072	96	96	SSPN, TMED10, PAM, CAV2, ARF1, AP3S1, CD63, SEC24D, VAMP3, TMED2, EGFR, VPS4B, PPT1, TMX1, ERGIC3, STX16, BNIP3, USO1, ADAM10, ANP32E, KRT18, GNAS, AP2B1, LMAN1, SEC31A, GLA, ARCN1, GALC, M6PR, AP2S1, SCRN1, AP2M1, SCAMP1, ICA1, RER1, SGMS1, RAB5A, SNAP23, VAMP4, ARFGAP3, COPE, IGF2R, RAB9A, DST, RAB22A, SCAMP3, DOPEY1, ATP7A, CLTA, STX12, ZW10, MAPK1, RAB14, TSPAN8, ARFIP1, CLN5, BET1, YIPF6, GO…
HALLMARK_MYC_TARGETS_V1	0.36964	1.5611	0.0032751	0.0124809	200	197	RSL1D1, EIF3D, POLE3, NPM1, RPL6, RPL22, RPL14, MCM7, IMPDH2, SNRPA, U2AF1, PA2G4, UBA2, NAP1L1, APEX1, HNRNPA1, FBL, PRDX4, RPL18, MCM5, RPS3, PABPC4, PABPC1, RPS2, CDK2, CDC45, LDHA, RPL34, CNBP, TYMS, SERBP1, PGK1, TRIM28, AP3S1, GNL3, RPLP0, MCM2, HNRNPD, RPS5, PWP1, HSP90AB1, RPS6, SNRPD1, EIF3B, EIF4A1, RPS10, RFC4, PRPF31, H2AFZ, CLNS1A, MCM6, PHB2, EIF4H, EEF1B2, RUVBL2, DEK, SRM, CCNA2, …
HALLMARK_HEME_METABOLISM	-0.290125	-1.53562	0	0.0130018	200	183	SLC30A10, CCND3, SLC2A1, KHNYN, MXI1, TAL1, MYL4, NARF, NR3C1, CIR1, SEC14L1, SIDT2, CAST, SLC6A9, ADD2, E2F2, RAD23A, SMOX, ERMAP, BACH1, ARL2BP, CDC27, ABCG2, ENDOD1, P4HA2, GYPC, FOXO3, IGSF3, BNIP3L, C3, HTRA2, SLC6A8, CLIC2, FOXJ2, VEZF1, TNS1, RIOK3, ABCB6, MKRN1, SLC10A3,SLC25A37, PGLS, CPOX, HTATIP2, XK, UBAC1, GMPS, MARCH2, SLC7A11, ADD1, GYPE, CTSE, HBB, ELL2, MPP1, LMO2, PQLC1, MFHAS1,…
HALLMARK_MITOTIC_SPINDLE	0.36142	1.51682	0.0066372	0.0188643	200	199	PLEKHG2, FLNB, FSCN1, SEPT9, ANLN, MID1, CNTROB, KIF4A, MAP1S, WASF2, GEMIN4, ARHGEF7, TUBD1, CENPJ, NCK2, GSN, RAPGEF5, MYO1E,CDC42EP1, ARAP3, PRC1,ARHGAP29, MYO9B, LLGL1, AKAP13, PREX1, NCK1, NEDD9, CEP57, EZR, FLNA, MARCKS, KIF20B, CCNB2, NDC80, ARHGEF2, MARK4, SYNPO, TPX2, CEP250,CDC42EP4, TTK, ARHGDIA, SORBS2, CENPF, CEP72, BRCA2,ARHGAP10, CDC27, DLGAP5, TOP2A, MYH9, KLC1, PLK1, CAPZB, BIRC5…
HALLMARK_TNFA_SIGNALING_VIA_NFKB	0.362591	1.50864	0.0032967	0.0197218	200	194	CCND1, IRS2, FJX1, IER5, VEGFA, EDN1, LAMB3, PANX1, PTPRE, PLK2, PMEPA1, JAG1, DENND5A, RELA, IFNGR2, PLAUR, CD44, SLC2A3, ETS2, PHLDA1, DUSP4, BMP2, SLC16A6, TNFAIP6, MARCKS, INHBA, TNIP1, CCL20, PNRC1,SERPINB8, CEBPB, IL15RA, TAP1, EFNA1, CCRL2, CCL5, RIPK2, SPSB1, BIRC3, RHOB, BCL6, PHLDA2, CXCL3, AREG, BHLHE40, SPHK1, KLF4, TNFAIP8, CDKN1A, OLR1, MYC, TRIP10, EIF1, FOSL1, NFKB2, NFIL3, KLF6,S…
HALLMARK_IL6_JAK_STAT3_SIGNALING	0.388107	1.46809	0.0201765	0.0280515	87	81	TGFB1, IL3RA, IL4R, ACVRL1, ITGA4, IFNGR2, CD44, OSMR, IL10RB, IL1R2, PDGFC, CSF2RB, IL17RA, PIK3R5, IRF9, IL15RA, FAS, PTPN2, IFNAR1, IL12RB1, A2M, MYD88, TYK2, CXCL3, TNFRSF1A, EBI3, TNFRSF1B, IFNGR1, IL2RA, STAT2, CD9, CSF1, CBL, CXCL9, JUN, TNF, CXCL1, CSF3R, CD36, CD14, CSF2RA, LTBR,TNFRSF12A, PLA2G2A, PTPN1, IL13RA1, SOCS3, MAP3K8, IL1R1, CXCL11, CXCL13, STAT3, HMOX1, CXCL10, IL6, LTB, TLR2…
HALLMARK_MYC_TARGETS_V2	0.412291	1.45499	0.0275591	0.0303232	58	58	HK2, NPM1, MRTO4, PA2G4, MCM5, EXOSC5, MAP3K6, GNL3, MYBBP1A, PLK4, LAS1L, BYSL, SRM, PES1, PPAN, WDR74, PLK1, PPRC1, NOP56, GRWD1, WDR43, MYC, CBX3, TMEM97, DDX18, CDK4, NOP16, RABEPK, RRP12, NOLC1, NOC4L,MPHOSPH10, DCTPP1, TCOF1, IPO4, PUS1, NIP7, RRP9, MCM4, NOP2, UTP20, FARSA, IMP4, SLC29A2, SLC19A1, UNG, RCL1, DUSP2, PRMT3, PHB, TBRG4, SORD, NDUFAF4, HSPD1, TFB2M, HSPE1, AIMP2, SUPV3L1
HALLMARK_COMPLEMENT	0.339883	1.42041	0.0167038	0.0400401	200	190	LGALS3, CP, MT3, PLA2G7, PHEX, GNAI2, CASP4, DOCK9, CDH13, MMP15, COL4A2, F8, NOTCH4, APOC1, PLAUR, ANG, LCP2, MMP14, TIMP1, SH2B3, LIPA, CASP1, FN1, CTSD, RHOG, DYRK2, LTA4H, TIMP2, CD55, FYN, DPP4, GNB4, GNAI3, ANXA5, ZEB1, LYN, PIK3R5, FCER1G, CLU, CEBPB, GNG2,APOBEC3F, ADAM9, PRSS36,APOBEC3G, CCL5, PDGFB, IRF7, GZMB, STX4, MMP13, DOCK10, LRP1, CBLB, GNB2, PFN1, ADRA2B, CSRP1, CASP3, C3, RCE1,…
HALLMARK_APOPTOSIS	0.339124	1.38823	0.0324074	0.0515554	161	156	CCND1, LGALS3, FDXR, ENO2, CASP4, TGFB2, FEZ1, CAV1, ISG20, GSN, CASP2, RELA, CDK2, ANXA1, BAX, LMNA, CTNNB1, CD44, PDGFRB, BGN, TIMP1, BRCA1, PEA15, CASP1, CCNA1, CCND2, NEDD9, IFITM3, TIMP2, BID, BMP2, CLU, TAP1, TSPO, FAS, F2R, EMP1, PPT1, WEE1, BIRC3, HMGB2, RHOB, TOP2A, PRF1, LEF1, CASP8, PTK2, RARA, BNIP3L, MMP2, CASP3, PDCD4, CDKN1A, GNA15, ROCK1, PPP3R1, IFNGR1, BCL10, CD2, MCL1, GPX1, CD…
HALLMARK_IL2_STAT5_SIGNALING	0.329222	1.36663	0.0200669	0.0607088	200	192	HK2, TNFRSF4, CCND3, P4HA1, GUCY1B3, IL3RA, IL4R, PRAF2, ANXA4, SPRY4, NDRG1, CD81, TNFSF11, PLEC, DENND5A, CDCP1, PRKCH, MYO1E, LRRC8C, CD44, ARL4A, CDC6, SLC2A3, CTSZ, SWAP70, AHR, MYO1C, PHLDA1, CCND2, ADAM19, IFITM3, CD79B, GLIPR2, SPRED2, BATF3, BMP2, MUC1, IL1R2, NRP1, PTRH2, COL6A1, CYFIP1, SYT11, IL2RB, SERPINB6, AHNAK, HOPX, PLAGL1, EMP1, RHOB, SYNGR2, ETV4, ALCAM, ECM1, BHLHE40, BMPR2, …
HALLMARK_KRAS_SIGNALING_UP	0.32169	1.34773	0.0301339	0.0702136	200	185	ANO1, ALDH1A2, MALL, NGF, IGFBP3, PTPRR, ANGPTL4, GPNMB, PRDM1, MMP9, TRIB2, PECAM1, MMP11, ETS1, PLVAP, TMEM100, CXCR4, MPZL2, BTBD3,SERPINA3, FLT4, GUCY1A3, HOXD11, PLAUR, SOX9,ADAMDEC1, TSPAN13, IGF2, ADAM17, ITGBL1, CCND2, KCNN4, BMP2, ITGB2, GNG11, SPARCL1, INHBA, CCL20, NRP1, ENG, FCER1G, LAPTM5, PSMB8, EMP1, BIRC3, SCN1B, ACE, PRRX1, CD37, ETV4, GYPC, LAT2, ADAM8, KLF4, DCBLD2, LY96,TNFRSF…
HALLMARK_TGF_BETA_SIGNALING	0.377895	1.34171	0.0924479	0.0708841	54	54	TGFB1, SKI, PMEPA1, IFNGR2, FKBP1A, CTNNB1, RAB31, BMP2, ENG, NCOR2, WWTR1, RHOA, ID3, LTBP2, BMPR2,SERPINE1,PPP1R15A, CDK9, SKIL, BMPR1A, SMURF1, LEFTY2, SMAD7, ID2, TJP1, HDAC1, KLF10, JUNB, SMAD1, FURIN, TGFBR1, CDH1, TGIF1, FNTA, MAP3K7, SMURF2, ID1, ARID4B, SPTBN1, APC, ACVR1, NOG, THBS1, CDKN1C, PPP1CA, UBE2D3, SMAD6, SLC20A1, SMAD3, HIPK2, TRIM33, BCAR3, XIAP, PPM1A
HALLMARK_ESTROGEN_RESPONSE_LATE	0.304152	1.28313	0.0769231	0.112359	200	190	NMU, TMPRSS3, CCND1, SLC1A4, HR, FLNB, SFN, PKP3, TPSAB1, LSR, MDK, RPS6KA2, KRT19, GINS2, CLIC3, HOMER2, CAV1, ISG20, SERPINA3, WISP2, SLC16A1, RNASEH2A, RAB31, TPBG, CD44, SCARB1, PRSS23, SLC7A5, MYOF, TSPAN13, CDC6, ATP2B4, OPN3, CCNA1, TRIM29, SLC24A3, GJB3, MYB, KIF20A, PERP, PLK4, CALCR, EMP2, NCOR2, RAPGEFL1, LAMC2, PDLIM3, PLA2G16, CELSR2, TOP2A, DLG5, AREG, PTPN6, KLF4, XRCC3, JAK1, PDCD…
HALLMARK_ESTROGEN_RESPONSE_EARLY	0.296377	1.26864	0.0813559	0.120844	200	195	TMPRSS3, KRT15, ELOVL2, CCND1, KCNK15, STC2, MREG, SLC1A4, SLC2A1, HR, FLNB, KDM4B, INHBB, SYT12, SFN, GJA1, RPS6KA2, KRT19, CLIC3, WISP2, SLC16A1, RAB31, TPBG, CD44, SCARB1, PRSS23, SLC7A5, MYOF, MED13L, OPN3, MYBBP1A, SLC24A3, CALB2, MYB, MUC1, CALCR, NCOR2,RAPGEFL1, CANT1, PDLIM3, CLDN7, CELSR1, PLA2G16, SLC7A2, CELSR2, CBFA2T3, DLC1, TTC39A, MLPH, ENDOD1, REEP1, AREG, ISG20L2, RARA, BHLHE40, …
HALLMARK_UNFOLDED_PROTEIN_RESPONSE	0.301907	1.19638	0.172497	0.196818	113	110	STC2, CXXC1, SLC1A4, VEGFA, NPM1, EXOSC2, EXOSC5, GEMIN4, SHC1, DDIT4, EXOSC9, SLC7A5, EEF2, RPS14, EDEM1, CKS1B, EIF4A1, CNOT2, CEBPB, SEC11A, IMP3, DCTN1, EXOSC10, ATF4, NFYA, TSPYL2, DKC1, HSP90B1, ZBTB17, NOP56, MTHFD2, NHP2, CALR, KHSRP, YWHAZ,EIF4EBP1, H2AFX, EIF4A2,ALDH18A1, FUS, EIF2S1, PDIA6, EIF4A3, SEC31A, DCP1A, FKBP14, NOLC1, SSR1, TATDN2, TARS, DCP2, IGFBP1, EDC4, ASNS, BANF1, ATF3,…
HALLMARK_COAGULATION	0.294063	1.1711	0.210084	0.225957	138	126	MMP9, PECAM1, MMP11, BMP1, MMP15, DUSP14, P2RY1, GSN, F8, ANXA1, APOC1, SPARC, ANG, PRSS23, MMP14, TIMP1, VWF, CRIP2, FN1, LTA4H, FYN, CTSK, DPP4, CLU, RAC1, ADAM9, PDGFB, LRP1, A2M, GNB2, USP11, MMP7, FBN1, CSRP1, MMP2, C3, OLR1, C1QA, COMP, SH2B2,SERPING1, ITGA2, HTRA1,SERPINE1, THBD, F2RL2, TF, CD9, MAFF, PLEK, SIRT2, CFB, CFH, CTSO, MASP2, LEFTY2, CFD, TIMP3, CTSE, C2, PROS1, FURIN, KLF7, WDR…
HALLMARK_UV_RESPONSE_UP	-0.222544	-1.12854	0.163399	0.231558	158	148	NPTX2, AMD1, CCND3, POLE3, CDKN2B, ENO2, LHX2, MSX1, CHRNA5, CDK2, MMP14, CDC5L, EIF2S3, BID, BMP2, ALDOA, SIGMAR1, LYN, RFC4, TAP1, STARD3, PDLIM3, SHOX2, HLA-F, PPT1, RHOB, ARRB2, FEN1, CASP3, SLC6A8, PDAP1, HYAL2, H2AFX, MGAT1, PRKACA, POLG2, NFKBIA, HSPA13, MRPL23, CDC34, CREG1, IGFBP2, RPN1, STK25, WIZ, FOSB, PSMC3, MARK2, CXCL2, DLG4, POLR2H, PRPF3, AP2S1, JUNB, TARS, NTRK3, FGF18, ASNS, FU…
HALLMARK_MTORC1_SIGNALING	-0.214166	-1.1303	0.151515	0.24975	200	198	EGLN3, HK2, SLC1A4, SLC2A1, P4HA1, FDXR, SYTL2, PDK1, RIT1, ACLY, TPI1,SERPINH1, RPA1, VLDLR, CXCR4, GAPDH, DAPP1, LDHA, DDIT4, PGK1, SLC7A5, SLC2A3, MCM2, TRIB3, FAM129A, LTA4H, EDEM1, ITGB2, PITPNB, PLOD2, ALDOA, TES, SEC11A, PIK3R3, RRM2, ENO1, IGFBP5, ATP2A2, PLK1, BCAT1, SHMT2, BHLHE40, HSP90B1, BUB1, CDKN1A, MTHFD2, GPI, CALR, PDAP1, NFIL3, PGM1, TMEM97, UFM1, USO1, PSMD13,PPP1R15A, CCNF, C…
HALLMARK_CHOLESTEROL_HOMEOSTASIS	-0.248774	-1.13049	0.226891	0.274376	74	73	LGALS3, ALDOC, CXCL16, JAG1, CTNNB1, PLAUR, TRIB3, FAM129A, GPX8, GUSB, CBS, ANXA5, PNRC1, CLU, ABCA2, ALCAM, S100A11, NFIL3, TMEM97, ACTG1, CD9, ERRFI1, FADS2, FDPS, FABP5, NSDHL, PLSCR1,TNFRSF12A, TP53INP1, ANTXR2, ATF3, SQLE, FASN, MAL2, LDLR, ETHE1, PMVK, GSTM2, GNAI1, MVD, ATF5, CPEB2, SEMA3B, SCD, STX5, STARD4, AVPR1A, LGMN, ANXA13, LPL, SREBF2, FBXO6, HMGCR, PDK3, HSD17B7, ACSS2, ADH4, EBP…
HALLMARK_DNA_REPAIR	0.262425	1.08016	0.333333	0.367479	150	143	DDB2, RFC2, LIG1, POLR3C, IMPDH2, TP53, RAD51, POLR1D, TYMS, RFC5, SSRP1, MPG, POLL, HCLS1, ERCC5, VPS37B, ADA, TMED2, RFC4, GUK1, CANT1, POLE4, POLR2D, GTF2F1, RALA, SUPT5H, PRIM1, RNMT, BRF2, USP11, POLH, NT5C, ERCC3, FEN1, NFX1, ZNRD1, CMPK2, DGUOK, POLA1, SF3A3, GTF3C5, NME3, POLD1, CLP1, POM121, UMPS, RPA2, POLR1C, ITPA, BCAP31, ERCC1,POLR3GL, ZWINT, PCNA, SNAPC4, RFC3, NME1, POLR2I, DCTN4, …
HALLMARK_SPERMATOGENESIS	-0.224277	-1.04393	0.346154	0.378589	135	94	GRM8, RPL39L, PIAS2,CSNK2A2, JAM3, SEPT4, ARL4A, CCNA1, TOPBP1, CCNB2, RFC4, COIL, TTK, CNIH2, CHFR, ACE, HSPA1L, TEKT2, NCAPH, OAZ3, EZH2, BUB1, NEK2, KIF2C, DMC1,IL13RA2,SLC12A2, CDKN3, SCG5, SIRT1, DBF4, SHE, SPATA6, NPHP1, CAMK4, AURKA,ADCYAP1, PGS1, GFI1, TSN, IP6K1, PCSK4, CDK1, AGFG1, HSPA4L, GMCL1, SLC2A5, MAST2, TUBA3C, POMC, CFTR,IL12RB2, TKTL1, CLVS1, VDAC3, GSG1, SCG3, YBX2, HSPA2, AC…
HALLMARK_PI3K_AKT_MTOR_SIGNALING	0.241428	0.941102	0.582536	0.640452	105	100	NGF, SLC2A1, SFN, E2F1, PDK1, RIT1, CXCR4, DAPP1, CDK2, PTEN, ARF1, NCK1, TRIB3, NOD1, RAC1, AKT1, EGFR, PIK3R3, GNGT1, ARHGDIA, MKNK1, MYD88, SMAD2, PFN1, HSP90B1,TNFRSF1A, CDKN1A, RPTOR, CALR, CDK4, TRAF2, CSNK2B, TSC2, STAT2, ARPC3, PLCG1, CDKN1B, RIPK1, ACTR3, CFL1, HRAS, UBE2N, PLCB1, SLA, AKT1S1, PIN1, TIAM1, FASLG, CAMK4, ACTR2, AP2M1, GSK3B, TBK1,PLA2G12A, ECSIT, MAP3K7, MAP2K3, IL2RG, RA…
HALLMARK_KRAS_SIGNALING_DN	0.226204	0.901558	0.665882	0.681296	200	133	TGM1, KRT15, PKP1, CAMK1D, EDN1, COPZ2, CACNA1F, NRIP2, MYO15A, TGFB2, DLK2, KCNMB1, TCF7L1, IFI44L, ALOX12B, CHST2, CCNA1, KLHDC8A, SLC6A3, SYNPO, SHOX2, PTGFR, CELSR2, GPR19, KCNN1, GPR3, MX1, CD207, IDUA, RSAD2, ACTC1, EDN2, BARD1, NUDT11, MFSD6, GTF3C5, CPB1, CDKAL1, CD80, SKIL, YPEL1, CLSTN3, IGFBP2, KRT13, PDE6B, SNCB, ASB7, NTF3, MEFV, FGFR3, KRT5, TCL1A, ZBTB16, SLC12A3, SLC25A23, ABCG4, …
HALLMARK_ANDROGEN_RESPONSE	0.233175	0.904619	0.644802	0.695206	101	97	CCND1, CCND3, PA2G4, KRT19, UBE2I, PMEPA1, NDRG1, HOMER2, GUCY1A3, UBE2J1, STK39, RAB4A, ACTN1, GNAI3, SEC24D, INPP4B, STEAP4, CDK6, AKT1, CAMKK2, SPDEF, TNFAIP8, SLC38A2, B2M, KRT8, MYL12A, ELOVL5, FADS1, LMAN1, ANKH, XRCC5, SAT1, PIAS1, RRP12, PDLIM5, SRF, TSC22D1, ELL2, XRCC6, ZMIZ1, ARID5B, MAF, VAPA, SGK1, NGLY1, ADRM1, TMEM50A, SPCS3, HERC3, ADAMTS1, PGM3, SLC26A2, ELK4, DHCR24, APPBP2, FKB…
HALLMARK_PANCREAS_BETA_CELLS	-0.237861	-0.828008	0.743363	0.866267	40	27	PAK3, DPP4,SEC11A,STXBP1, AKT3, SST, MAFB, LMO2, GCK, SRP14, PCSK1, FOXA2, SCGN, DCX, ELP4,NKX6-1, PAX6,SLC2A2, PKLR, HNF1A, FOXO1, SPCS1, SRP9, CHGA, VDR, SYT13, SRPRB
HALLMARK_APICAL_SURFACE	0.231386	0.76671	0.804709	0.884647	44	42	EFNA5, PLAUR, BRCA1, CX3CL1, LYN, IL2RB, CROCC, ATP8B1, TMEM8B, DCBLD2, SULF2, SRPX, EPHB4, FLOT2, ADAM10, APP, CD160, THY1, MDGA1, IL2RG, SHROOM2, B4GALT1, AIM1, NTNG1, NCOA6, LYPD3,SLC22A12, SLC34A3, HSPB1, ADIPOR2, SLC2A4, GSTM3, AFAP1L2, RTN4RL1, GATA3, GAS1, SCUBE1, RHCG,ATP6V0A4, PKHD1, MAL, AKAP7

## Sheet: CCPAPvsNormal_C2
	es	nes	pval	fdr	gene_set_size	matched_size	genes
LEE_LIVER_CANCER_SURVIVAL_UP	-0.487065	-2.49457	0	0	185	159	SEPT4, ATG16L1, ZBTB22, PCSK6, FAM134C, INSR, UNKL, FMO3,SERPING1, CYP2J2, ZP3, PHLPP1, MASP2, MAP4K1,SERPINF1, MRM1, C2, PRDX6, TSKU, EGLN2, NF1, IL6R, ASGR1, AQP9, FBXO31, ZBED1, ITIH1, F12, APOA5, UGT2B15, CYP4F11, DENND5B, CGREF1, HSD17B6,TMEM176B, CFHR5, SULT2A1,SERPIND1, MORN1, F10, SGPL1, KLK3, DEPDC7, SLC38A3, PAH, ACSM5, RDH5, CPB2,SLC22A18, G6PC, DPYS, DIO1, TTBK1, CPN2, SLC2A2, AR, CDH…
RODWELL_AGING_KIDNEY_UP	0.58149	2.59868	0	0	487	443	ST8SIA4, HLA-G, SCN5A, CD47, LPCAT1, CTHRC1, MALL, CRIP1, C15orf39, CCND3, VASH1, DPCD, FDXR, COL8A2, NRXN3, ODF3B, FSCN1, RPL10, SYTL2, FXYD5, TMEM173, LDLRAD3, TPSB2, ARHGDIB, GPNMB, MICALL2, SNHG12, BHLHE41, RPL12, FHOD1, TREX1, VIM, TESC, TMEM43, ALOX5, CD1D, CELF2, MCAM, GMFG, PTPRE, MMP11, ANXA2, PAM, PGM2L1, IFNAR2, RPL35A, IKBIP, RPS25, ZCCHC7, CALHM2, CMTM3, AATF, FAM198B, SLFN11, RPS19,…
ELVIDGE_HYPOXIA_UP	0.657514	2.75	0	0	171	165	CA9, INHA, GPR87, SPAG4, KRT15, ECE1, EGLN3, HK2, NOL3, STC2, AHNAK2, ZNF395, ARTN, EFNA3, OLFML2A, SLC2A1, LOXL2, P4HA1, FLNB, VEGFA, QSOX1, KDM4B, IGFBP3, RLF, TMEM45A, SFXN3, ANGPTL4, GJA1, ALDOC, ENO2,CSGALNACT1, MXI1, INSIG2, PDK1, PFKP, PAM, ADM, OBSL1, B3GNT4, NDRG1, PXDN, HEY1, VLDLR, YEATS2, CXCR4, CAV1, ISG20, PTRF, KDM3A, WISP2, TGFBI, ZNF654, DDIT4, PLAUR, ANG, SPRY1, SCARB1, STBD1, P…
REACTOME_CITRIC_ACID_CYCLE_TCA_CYCLE	-0.82673	-2.64704	0	0	26	19	SDHA, IDH3G, IDH3B, OGDH, MDH2, DLST, CS, ACO2, IDH2,SUCLG2, SDHB,SUCLG1, IDH3A, SDHC,SUCLA2, SDHD, NNT, FH, DLD
KEGG_VALINE_LEUCINE_AND_ISOLEUCINE_DEGRADATION	-0.755876	-3.10422	0	0	44	44	IL4I1, BCAT1, OXCT2, BCKDHA, BCAT2, ACADS, PCCA, ALDH1B1, ACADSB, AOX1, ACAA1, ALDH2, ABAT, ALDH7A1, ACAT2, HIBCH, IVD, HADHA, HMGCL, ACAA2, ALDH6A1, ECHS1, MCEE, EHHADH, HMGCS1, ALDH3A2, BCKDHB,HSD17B10, AUH, HMGCS2, HADH, OXCT1, MCCC2, ACADM, ALDH9A1, ACAD8, HADHB, MCCC1, MUT, DBT, ACAT1, HIBADH, DLD, PCCB
CHIANG_LIVER_CANCER_SUBCLASS_PROLIFERATION_DN	-0.484825	-2.48737	0	0	179	156	TFR2, F8, COL18A1, SORBS2, KCNJ8, MYO1B, RHOB, FMO3, OASL, SERPING1, CYP2J2, RORC, MASP2, TPRG1, ECM2, CYP2C8, SYBU, KLF9, AQP9, BOK, RWDD3, NR1I2, ITIH1, ACBD4, F12, APOA5, CCL14, CYP4F11, HSD17B6, SULT2A1, GNE, CYP8B1, PDK4, UGT1A10, DHRS1, DEPDC7, SLC38A3, HSD11B1, PLG, ABCA8, PRAP1, SLC16A2, ACSM5, CPB2, CYP4F2, HAAO, AFM, DAO, CYP27A1, SLC2A2, AR, HPD, ACYP2, AGXT2, BAAT, MAT1A, ADH6, PIPOX,…
RODWELL_AGING_KIDNEY_NO_BLOOD_UP	0.546849	2.32345	0	0	222	201	SCN5A, CTHRC1, DPCD, FSCN1, SYTL2, TPSB2, GPNMB, MICALL2, BHLHE41, RPL12, PHLDA3, MCAM, MMP11, ANXA2, PAM, PGM2L1, RPL35A, RPS25, PLK2, AATF, SERPINH1, TPM1, PXDN, ARHGAP1, STS, NNMT, PTRF, PLOD3, LHFP, P4HB, ANXA1, B3GAT3, ITPR3, COL5A1, CDC42EP1, PELO, LIX1, POLR1D, RFTN1, TPBG, AXL, MFGE8, OSMR, TIMP1, MTHFD1L, MYOF, NFIX, PROM1, DKK3, SLC1A3, SETD7, GABRP, VEGFC, DEGS1, FN1, CLDN3, TMED3, ITM…
HOSHIDA_LIVER_CANCER_SUBCLASS_S3	-0.433707	-2.37398	0	0	266	259	CP, SLC6A1, CPA3, CD81, NNMT, SDC1,SERPINA3, FLT4, MYO1E, EPAS1, SDS, EDNRB, ETS2, RNASE4, INSR, SPARCL1, CPA4, EMP2, ISG15, COL18A1, EGFR, RARRES2, KCNJ8, SLC7A2, NFIB, RHOB, ZNF160,SLC9A3R2, MYLK, TDO2, SORL1,SERPING1, CNGA1, C4BPA, PGM1, CYP2J2, SLPI, SLCO2A1, TCEA2, NFKBIA, FANCA, CECR1, CFB, ICAM3, CFH, CTSO, CD14, SLC23A2, LCAT, CXCL2, TOB1, PLA2G2A, CSTB, IL13RA1, TINAGL1, APOC4, C4A, CYP2…
KEGG_ECM_RECEPTOR_INTERACTION	0.60957	2.30373	0	0	84	77	COL5A3, CD47, LAMA3, LAMB2, IBSP, LAMB3,COL11A1, LAMA4, ITGB4, ITGA4, COL5A2, THBS3, COL4A1, COL4A2, ITGB1, SDC1, ITGA5, ITGA7, GP6, COL6A2, HSPG2, AGRN, COL5A1, LAMC1, CD44, VWF, SV2A, FN1, COL1A2, COL1A1, ITGA3, ITGA10, COL6A1, THBS2, LAMC2, ITGA1, LAMA5, COL3A1, SDC3, ITGB5, COL6A3, ITGB8, COMP, ITGA2, LAMC3, ITGA6, ITGA8,COL11A2, ITGA9, CD36, THBS4, ITGA11, TNXB, TNC, HMMR, SDC2, LAMA1, ITGB6…
KEGG_OXIDATIVE_PHOSPHORYLATION	-0.57707	-2.83315	0	0	135	111	COX4I2,NDUFA4L2, TCIRG1, NDUFS5, ATP5G2, COX7A1, NDUFA7, NDUFS4, ATP6AP1, ATP5D, PPA1, NDUFB7, SDHA,ATP6V0A2, NDUFB4, NDUFA8, NDUFB10, COX5B,ATP6V1G1, NDUFA1, ATP5O, COX6A2, COX17, UQCRHL, COX6B1, COX6C, COX7C, UQCRB, NDUFC1, NDUFV3, UQCRH, COX7A2, UQCR11, ATP5H, COX10, COX7A2L, ATP5I, NDUFB8, LHPP, NDUFA2, COX4I1,ATP6V1G2, ATP12A, COX11, NDUFV2,ATP6V1B2, ATP5E,ATP6V0E1, UQCR10, NDUFB5, NDUFS6, N…
REACTOME_INFLUENZA_LIFE_CYCLE	0.633676	2.5714	0	0	203	134	RPL4, RPL10A, RPL10, RPS8, RPL23A, RPL15, RPS24, RPL38, RPL12, RPL6, RPL22, RPL14, RPL11, RPL7A, RPL5, RPL19, RPL35A, RPS25, RPL32, RPL30, RPL3, RPS19, RPL17, RPL18, RPL27A, RPS4X, RPS3, RPL37, NUP62, RPL31, RPL41, RPS2, RPL28, RPL37A, RPS23, RPL18A, RPS18, RPL13, RPL29, RPL23, RPL36, RPL34, RPS11, RPLP2, RPL24, FAU, RPL26, NUP54, RPLP0, RPS20, RPS13, RPS15A, RPL8, RPS14, RPL7, RPL35, RPS5, RPS6,…
REACTOME_PYRUVATE_METABOLISM_AND_CITRIC_ACID_TCA_CYCLE	-0.62702	-2.47129	0	0	48	39	SLC16A3, PDK1,SLC16A1, LDHA, PDK4, SDHA, PDPR, IDH3G, BSG, IDH3B, IDH1, PDP1, D2HGDH, PDK3, PDHX, OGDH, ADHFE1, PDK2, MDH2, L2HGDH, DLST, CS, ACO2, DLAT, IDH2, SUCLG2, PDP2, SDHB, PDHB, SUCLG1, IDH3A, LDHB, SDHC, SUCLA2, SDHD, PDHA1, NNT, FH, DLD
RODWELL_AGING_KIDNEY_NO_BLOOD_DN	-0.631308	-3.25646	0	0	150	142	RPL10, AUTS2, TCTN3, ZFAND5, DSG2, BCAN, IGF1R, ITPR1, GNAS, SHANK2, SP2, TOX3, ZBTB43, CCNB1IP1, KLF9, ARHGAP18, KIAA0141, RHOBTB3, GSTA4, ADCY1, TSPAN7, ZNF711, RBM14, SLK, TBC1D9, CRABP1, SCML1, ATXN7L3B, PTPRO, FRMD3, GMNN, GPRASP1, NEDD4L, USP9X, CEP70, FOLH1B, FAM83F, TMEM80, PAIP1, GSTM4, GRAMD2, PPP2R1B, ISCA1, SLC25A36, KLHL24, COX6C, COX7C, SLC22A23, C2orf68, ERLIN2, KLHL3, LPL, PCBP2, …
RODWELL_AGING_KIDNEY_DN	-0.650941	-3.29882	0	0	145	131	RPL10, AUTS2, DCBLD2, AMPD3, FXR1, GNAS, SHANK2, SIAH2, SP2, TOX3, ZBTB43, CACNB2, CCNB1IP1, KLF9, NF1, RHOBTB3, ADCY1, TSPAN7, ZNF711,LINC00476, RBM14, SLK, CRABP1, CYB5RL, SCML1, ATXN7L3B, FRMD3, GMNN, GPRASP1, NEDD4L, ZNF253, TRPM6, CEP70, YOD1, FOLH1B, FAM83F, CCDC93, TMEM80, GRAMD2, ISCA1, SLC25A36, KLHL24, COX7C, SLC22A23, ERLIN2, KLHL3, GNG7, LPL, GAD1, WDR61, B4GALNT3, PEG3, MTR, BMP7, MO…
REACTOME_INFLUENZA_VIRAL_RNA_TRANSCRIPTION_AND_REPLICATION	0.718819	2.8142	0	0	169	101	RPL4, RPL10A, RPL10, RPS8, RPL23A, RPL15, RPS24, RPL38, RPL12, RPL6, RPL22, RPL14, RPL11, RPL7A, RPL5, RPL19, RPL35A, RPS25, RPL32, RPL30, RPL3, RPS19, RPL17, RPL18, RPL27A, RPS4X, RPS3, RPL37, RPL31, RPL41, RPS2, RPL28, RPL37A, RPS23, RPL18A, RPS18, RPL13, RPL29, RPL23, RPL36, RPL34, RPS11, RPLP2, RPL24, FAU, RPL26, RPLP0, RPS20, RPS13, RPS15A, RPL8, RPS14, RPL7, RPL35, RPS5, RPS6, RPS16, RPS12,…
FLOTHO_PEDIATRIC_ALL_THERAPY_RESPONSE_UP	0.678164	2.37482	0	0	53	52	OLFML2A, EIF3D, FXYD5, RPL6, RPL22, RPL5, RPS19, RPL17, NDRG1, CLEC2B, EIF3L, TOMM20, RSL24D1, TMEM87A, EIF4B, RPL37A, CD34, EEF1G, RPL13, FAU, EEF2, AKAP13, RPLP0, RPS20, RPL7, RPS5, RPS6, RPS16, VAMP3, TMED2, RPL13A, RPS9, EMP1, RNF139, IL12RB1, RPL27, SLC38A2, TPT1, ITGA6, RPS28, TMEM57, MXRA7, KLF10, CD69, TBC1D15,CDC42EP3, SYPL1, RAB14, ZDHHC11, CTDSPL, RAB1A, STAM
KEGG_FATTY_ACID_METABOLISM	-0.71159	-2.91126	0	0	42	41	CPT1C, ACSL5, ACADVL, ADH6,CYP4A11,CYP4A22, ADH1A, ACADS,ALDH1B1, GCDH, ADH1B, ACSL4, ACOX3, CPT1B, ACADSB, ECI1, ADH1C, ACAA1, ALDH2,ALDH7A1, ADH4, ADH5, ACAT2, HADHA, ACAA2, ECHS1, EHHADH, CPT1A, ACOX1, ACSL6,ALDH3A2, ECI2, HADH, CPT2, ACADM,ALDH9A1, HADHB, ACADL, ACSL3, ACAT1, ACSL1
MENSE_HYPOXIA_UP	0.598916	2.31489	0	0	98	95	SPAG4, CDK19, HK2, PFKFB4, NOL3, STC2, ANKRD37, P4HA1, VEGFA, DPCD, KDM4B, CCNI, MED6, ANGPTL4, C4orf3, BHLHE41, ALDOC, WDR54, ENO2, MXI1, INSIG2, PDK1, ADM, NDRG1, KDM3A, ANG, PGK1, OSMR, SLC2A3, FAM110C,LOC154761, RBPJ, KDM4C, RNASE4, PPFIA4, LOX, PLOD2, FAM13A, SERGEF, CEBPB, GNA13, PPP1R3C, HCFC1R1, P4HA2, BHLHE40, NADSYN1, CLK3, STK4, KLF4, BNIP3, BNIP3L, EGLN1, GPI, NFIL3, UFM1, TC2N, PPP1R…
WOO_LIVER_CANCER_RECURRENCE_DN	-0.572706	-2.60507	0	0	80	75	ACSL5,SERPING1, C4BPA, CYP2J2, MASP2, APOC4, PCTP, APOL6, PEMT, LDLR, PLIN1, CSAD, CPS1, SULT2A1, SARDH, CYP2E1, PAH, CYP4F2, G6PC, DAO, CYP27A1, SLC2A2, HPD, MAT1A, ADH6, ACOX2, PIPOX, GLUL, APOC3, C4BPB, NHEJ1, CA14, HNF4A, CYP4F3, GPT, SLC2A9, PAOX, CYP4F12, FMO4, EPHX1, GCDH, PCK2, ADH1B, SLC35A2, CYB5A, ACADSB, AASS, MTTP, ECI1, ACAA1, BPHL, PC, CRAT, GLUD2, ACY1, ADH5, DCXR, GLUD1, QDPR, CY…
KEGG_PROPANOATE_METABOLISM	-0.760163	-2.78008	0	0	33	30	LDHA, MLYCD, LDHC, PCCA,ALDH1B1, ACACA, ALDH2, ABAT,ALDH7A1, ACSS2, ACACB, ACSS3, ACAT2, HIBCH, HADHA,ALDH6A1, ECHS1, MCEE, ACSS1, EHHADH, SUCLG2,ALDH3A2, SUCLG1, LDHB, SUCLA2, ACADM,ALDH9A1, MUT, ACAT1, PCCB
REACTOME_NONSENSE_MEDIATED_DECAY_ENHANCED_BY_THE_EXON_JUNCTION_COMPLEX	0.706577	2.79215	0	0	176	106	RPL4, RPL10A, RPL10, RPS8, RPL23A, RPL15, RPS24, RPL38, RPL12, RPL6, RPL22, RPL14, RPL11, RPL7A, RPL5, RPL19, RPL35A, RPS25, RPL32, RPL30, RPL3, RPS19, RPL17, RPL18, RPL27A, RPS4X, RPS3, PABPC1, RPL37, RPL31, RPL41, RPS2, RPL28, RPL37A, RPS23, RPL18A, RPS18, RPL13, RPL29, RPL23, RPL36, RPL34, RPS11, RPLP2, RPL24, SMG8, FAU, RPL26, RPLP0, RPS20, RPS13, RPS15A, RPL8, RPS14, RPL7, RPL35, RPS5, RPS6,…
REACTOME_G_ALPHA_Q_SIGNALLING_EVENTS	0.574347	2.31352	0	0	184	127	KISS1R, NMB, MCHR1, NTSR1, NMU, ADRA1B, DGKD, GPR4, DGKA, OPN4, F2RL3, PTAFR,ARHGEF25, EDN1, NMUR1, EDNRA, HRH1, GRK5, RASGRP2, GNB1, P2RY1, ANXA1, TBXA2R, PRKCH, ITPR3, BDKRB1, LPAR6, BDKRB2, EDNRB, GNG10, TRPC6, GNG11, DAGLB, GNB4, CYSLTR1, TACR2, LPAR2, GNG2, RGS19, P2RY6, PIK3R3, GNGT1, SAA1, MGLL, F2R, PTGFR, GNB2, GPR132, GNRH1, LTB4R, GNA15, EDN2, OXTR, CHRM3, NPFF, F2RL2, P2RY11, KALRN, G…
MOOTHA_HUMAN_MITODB_6_2002	-0.541781	-3.14931	0	0	429	406	FDXR, PDK1, RPL3, TOMM20, CYB5R3, BCKDK, NCAPH2, BAX, RPL18A, RPLP2, SDS, SLC1A3, TIMM9, NR3C1, BID, HCLS1, PTPRA, NRF1, STARD3, TSPO, DNASE2, RPS3A,SLC25A28, HSPA1L, CASP8, SHMT2, ACOT9, OAZ3, BNIP3, BNIP3L, ACSL5, MTHFD2, ABCB7, BCL2, MRPL17, DGUOK, ZNF33B, SBNO2, MAST1,IVNS1ABP, BCL2A1, OXA1L, ATP5G2,SLC25A14, ABCB6,ALDH18A1, CA5B, POLG2, HK1, UCP3, CYBA,SLC25A37, CPOX, APAF1, LMF2, MRPS27, MR…
REACTOME_PEPTIDE_CHAIN_ELONGATION	0.769126	2.92419	0	0	153	85	RPL4, RPL10A, RPL10, RPS8, RPL23A, RPL15, RPS24, RPL38, RPL12, RPL6, RPL22, RPL14, RPL11, RPL7A, RPL5, RPL19, RPL35A, RPS25, RPL32, RPL30, RPL3, RPS19, RPL17, RPL18, RPL27A, RPS4X, RPS3, RPL37, RPL31, RPL41, RPS2, RPL28, RPL37A, RPS23, RPL18A, RPS18, RPL13, RPL29, RPL23, RPL36, RPL34, RPS11, RPLP2, RPL24, FAU, EEF2, RPL26, RPLP0, RPS20, RPS13, RPS15A, RPL8, RPS14, RPL7, RPL35, RPS5, RPS6, RPS16, …
KEGG_PYRUVATE_METABOLISM	-0.715773	-2.74895	0	0	40	36	LDHA, AKR1B1, ACYP1, GLO1, ACYP2, PKLR, ME1, LDHC,ALDH1B1, PCK2, ME3, GRHPR, ACACA, LDHD, ALDH2, PC,ALDH7A1, ACSS2, ME2, ACACB, PCK1, ACAT2, MDH2, HAGHL, HAGH, ACSS1, DLAT,ALDH3A2, PDHB, LDHB, ACOT12, PDHA1,ALDH9A1, MDH1, ACAT1, DLD
MOOTHA_FFA_OXYDATION	-0.734984	-2.45635	0	0	22	22	NCAPH2, LMF2, NBN, ACADVL, ACADS, ACADSB, ECI1, CRAT, HADHA, ACAA2, ECHS1, CPT1A,HSD17B10, AMACR, HADH, CPT2, ACADM, HADHB, ACADL, DECR1, ACAT1, ACSL1
REACTOME_FORMATION_OF_THE_TERNARY_COMPLEX_AND_SUBSEQUENTLY_THE_43S_COMPLEX	0.695362	2.39848	0	0	74	49	EIF3D, RPS8, RPS24, RPS25, RPS19, EIF3E, RPS4X, RPS3, EIF3H, RPS2, RPS23, RPS18, RPS11, FAU, RPS20, RPS13,RPS15A,EIF2S3, RPS14, RPS5, RPS6, EIF3F, RPS16, RPS12, RPS17,RPS27A, EIF3B, RPS10, RPS9, RPS15, RPSA, RPS21, RPS3A, RPS29, RPS7, EIF3G,EIF1AX,EIF2S1, RPS28, RPS26, EIF3I, EIF3C,EIF2S2, RPS27,RPS4Y1, EIF3A,RPSAP9, EIF3K, EIF3J
BURTON_ADIPOGENESIS_6	-0.479698	-2.54397	0	0	189	176	CD1D, MCAM, IMPDH1, NNMT, MAP4K4,C20orf27, APOC1, SCARB1, ARL4A, CDKN2C, CCNG2, COL15A1, CD151, MGLL, RARRES2, RAB3D, RBPMS, BNIP3, PON2, PDAP1, PGM1, LTC4S, ITGA6, MRPL51, HP, CA3, AOC3, CFD, SDPR, TKT, DHRS7B, QKI, PHTF2, DNAJC15, ADCY6, UCK1, LCN2, ADIPOQ, PARM1, ABCD2, FASN, SGCD, S100A8, PEMT, ORM2, LUM, C9orf16, CIDEC, PNPLA2, ACAD9, FAM132A, C9orf72, FAM49B, TANK, ORM1, ATP5D, SLC25A1, LIA…
KEGG_RIBOSOME	0.77499	2.93721	0	0	88	85	RPL4, RPL10A, RPL10, RPS8, RPL23A, RPL15, RPS24, RPL38, RPL12, RPL6, RPL22, RPL14, RPL11, RPL7A,RPL36AL, RPL5, RPL19, RPL35A, RPS25, RPL32, RPL30, RPL3, RPS19, RPL17, RPL18, RPL27A, RPS4X, RPS3,RSL24D1, RPL37, RPL31, RPL41, RPS2, RPL28, RPL37A, RPS23, RPL18A, RPS18, RPL13, RPL29, RPL23, RPL36, RPL34, RPS11, RPLP2, RPL24, FAU, RPL26, RPLP0, RPS20, RPS13, RPS15A, RPL8, RPL7, RPL35, RPS5, RPS6,RPL22…
MOOTHA_MITOCHONDRIA	-0.516377	-2.97421	0	0	447	420	LGALS3, CD40, FDXR, PDK1, TP53, TOMM20, CYB5R3, BCKDK, CASP2, NCAPH2,TP53AIP1, BAX, SLC1A3, TIMM9, NR3C1, BID, PTPRA, GNLY, TYMP, GRB10, STARD3, TSPO, IMP3, DNASE2,SLC25A28, CASP8, SHMT2, PRPF6, ACOT9, OAZ3, BNIP3L, RPAIN, MTHFD2, ABCB7, HTRA2, BCL2, MRPL17, DGUOK, ZNF33B, ADCK2, SBNO2, MAST1, BCL2A1, OXA1L, ATP5G2,SLC25A14, CA5B, POLG2, VAV1, HK1, UCP3, CYBA,SLC25A37, CPOX, APAF1, GNAS, LMF2, MR…
KEGG_PEROXISOME	-0.564105	-2.57994	0	0	78	77	NOS2, XDH, FAR2, ACSL5, PEX10, MPV17, PEX14, DDO, PEX6, ABCD2, ABCD1, PRDX5, PMVK, MPV17L,SLC25A17, PEX11A, GNPAT, FAR1, PEX11B, DAO, BAAT, ACOX2, PIPOX, PEX5, ABCD4, PEX19, HAO2, PEX2, AGXT, PEX16, NUDT19, DECR2, SLC27A2, PXMP4, DHRS4, PAOX, AGPS, PEX12, MLYCD, ACSL4, IDH1, HACL1, ACOX3, PEX7, ACAA1, GSTK1, SOD1, CRAT, ECH1, PEX13, SOD2, PEX11G, HMGCL, PXMP2, MVK, PHYH, EHHADH, ACOX1, ACSL6, IDH…
WAKABAYASHI_ADIPOGENESIS_PPARG_RXRA_BOUND_WITH_H4K20ME1_MARK	-0.479389	-2.39566	0	0	145	131	TTYH2, KSR1, PLOD1, CYTH1, RASA3, AP3S1, FAM13A, BFAR, ZNF219, TMCC3, PLA2G16, LTBP3, DAB2IP, XRCC3, STOM,ADAMTS12, SCAF1, SCARB2, IFNGR1, PARL, MTUS1, PFKL, JAGN1, FADS2, TXLNG, AGPAT2, PLCB1, ATN1, CERK, EFR3A, MAPKBP1, PQLC3, BAZ2A, CD302, ADIPOQ, PAM16, PRNP, NR1D1, CSAD, LRRC8D, PNPLA2, FAM49B, TANK, PIM3, FABP4, PLEKHF2, CERS4, SLC1A5, SORT1, LIPE, DRAM2, REEP5, NMT1, PEX5, PLA2G6, ADIPOR2,…
FARDIN_HYPOXIA_11	0.753036	2.39662	0	0	32	32	EGLN3, PFKFB4, ZNF395, FUT11,ANKRD37, VEGFA, IGFBP3,ANGPTL4, ALDOC, MXI1, PDK1, TPI1, NDRG1, PLOD1, KDM3A, DDIT4, PGK1, SLC2A3, MTFP1, TNIP1, P4HA2,BHLHE40, BNIP3, BNIP3L, EGLN1, PGM1, IGF1R,FAM162A, BTG1, AK4, TXNIP, MAPT
WONG_MITOCHONDRIA_GENE_MODULE	-0.586099	-3.09471	0	0	217	214	CP, FDXR, SLC16A3, GIMAP5, MRPS17, SEC61G, PTRH2, TSPO, SLC9A5, CRYZL1, MTHFD2, ATP13A3, BCL2, TOMM7, NDUFS5, ATP5G2, ABCB6, ATP8A1, COX7A1, KARS, MRPL11, HSCB, NT5M, WARS2, DUT, GRPEL2,SLC25A32, MRPL45, TIMM10, GPD2, NDUFA7, CLPP, BOP1, VDAC2, DIABLO, NDUFA12, FIBP, PRDX5, NDUFS4, NME4, TOMM40, MRPS18C,SLC25A17, MRPS18A, ATP6AP1, SLC16A5, TRIM45,SLC25A19, SLC25A1, CHDH, TIMM8B, SCO2, MRPL36, MRP…
MANALO_HYPOXIA_UP	0.567213	2.37149	0	0	207	200	SPAG4, CDK19, EGLN3, PGF, STC2, ZNF395, LOXL2, P4HA1, VEGFA, ALPK3, CD200, IGFBP3, PTPRR, EDN1, TMEM45A, ANGPTL4, PPP1R13L, GPNMB, NFATC4, ENO2, MARCH3, FKBP9, MXI1, GRK5, AFAP1, CELF2, TRIB2, PAM, WASF2, RPS6KA2, FAM46A, COL4A1, CHSY1, ADM, RASSF2, COL4A2, TPM1, NDRG1, VLDLR, RPL27A, CXCR4, PLOD1, DCHS1, PTPRF, F8, NOTCH4, KDM3A, SEPT4, TGFBI, TLE1, CASK, COL5A1, TCF7L1, DDIT4, AXL, ZHX2, NINJ2,…
KEGG_CITRATE_CYCLE_TCA_CYCLE	-0.745646	-2.67859	0	0	32	29	ACLY, SDHA, IDH3G, IDH3B, PCK2, IDH1, OGDH, PC, PCK1, MDH2, DLST, CS, ACO2, ACO1, DLAT, IDH2,SUCLG2, SDHB, PDHB,SUCLG1, IDH3A, SDHC, OGDHL,SUCLA2, SDHD, PDHA1, MDH1, FH, DLD
BILANGES_SERUM_AND_RAPAMYCIN_SENSITIVE_GENES	0.731627	2.68113	0	0	68	67	RPL4, RPL10, RPS8, RPL15, RPS24, RPL6, RPL14,GLTSCR2, RPL7A, RPL5, RPS25, RPL32, RPL30, RPS19, RPL18, RPL27A, RPS4X, RPS3, EIF3L, EIF3H, RPL28, EIF4B, RPS23, EEF1G, RPL18A, RPL13, RPL29, RPL23, RPL24, FAU, EEF2, RPL26, RPS13, RPL8, RPS14, RPL7, RPS5, LTA4H, RPS6, EIF3F, RPS16, RPS17, UBA52, RPS27A, RPL13A, RPS10, RPS9, EEF1B2, RPS3A, EEF1A1, RPS7, CECR6, TPT1, PTMS, RPL21, QARS, NBEA, SPRY2, RPL3…
REACTOME_RESPIRATORY_ELECTRON_TRANSPORT	-0.677829	-2.99525	0	0	79	65	NDUFS5, NDUFA7,NDUFA12, NDUFS4,UQCRBP1, NDUFB7, SDHA, NDUFB4,NDUFA13, NDUFA8,NDUFB10, COX5B, NDUFA1, UQCRHL, COX6B1, COX6C, COX7C, UQCRB, NDUFC1, NDUFV3, UQCRH, UQCR11,COX7A2L, NDUFB8, NDUFA2, COX4I1, NDUFV2, NDUFB5, NDUFS6, NDUFB9, NDUFA3, UQCRC2, COX6A1,NDUFA11, NDUFS3, NDUFB6, NDUFS7, ETFB, NDUFC2,NDUFAB1, COX8A,NDUFA10, UQCRC1, UQCRQ, NDUFB1, NDUFA6, CYC1, NDUFV1, COX5A, COX7B, NDUFA5, NDUFS8…
SEMENZA_HIF1_TARGETS	0.727585	2.36488	0	0	36	35	CA9, HK2, ADRA1B, SLC2A1, VEGFA, CP, IGFBP3, NOS2, EDN1, ALDOC, TPI1, ADM, GAPDH, FLT1, TGFB3, LDHA, PGK1, IGF2, SLC2A3, EPO, ALDOA, ENO1, P4HA2, BNIP3, CDKN1A,SERPINE1, TF, HK1, PFKL, IGFBP2, IGFBP1, TFRC, HMOX1, CITED2, AK3
REACTOME_TRANSLATION	0.666658	2.74892	0	0	222	144	DDOST, RPL4, EIF3D, RPL10A, RPL10, RPS8, RPL23A, RPL15, RPS24, RPL38, RPL12, RPL6, RPL22, RPL14, RPL11, RPL7A, RPL5, RPL19, RPL35A, RPS25, RPL32, RPL30, RPL3, RPS19, RPL17, RPL18, EIF3E, RPL27A, RPS4X, RPS3, SSR2, PABPC1, EIF3H, RPL37, RPL31, RPL41, RPS2, RPL28, EIF4B, RPL37A, RPS23, EEF1G, RPL18A, EIF2B1, RPS18, RPL13, RPL29, RPL23, RPL36, RPL34, RPS11, RPLP2, RPL24, FAU, EEF2, RPL26, RPLP0, RPS…
REACTOME_TRANSFERRIN_ENDOCYTOSIS_AND_RECYCLING	-0.68074	-2.44031	0	0	25	25	TCIRG1, TF, TFRC, MCOLN1, STEAP3,ATP6V0A2,ATP6V1G1,ATP6V1G2,ATP6V1B2,ATP6V0E1,ATP6V1E2, ATP6V0C,ATP6V1G3,ATP6V1B1,ATP6V0D2,ATP6V0A4, ATP6V1F,ATP6V1C1,ATP6V1C2, ATP6V0B,ATP6V1E1, ATP6V1D,ATP6V0D1, ATP6V1H, ATP6V1A
ELVIDGE_HYPOXIA_BY_DMOG_UP	0.671407	2.72272	0	0	130	127	CA9, INHA, GPR87, SPAG4, EGLN3, HK2, STC2, AHNAK2, ZNF395, ARTN, OLFML2A, SLC2A1, LOXL2, P4HA1, VEGFA, QSOX1, IGFBP3, RLF, TMEM45A, SFXN3, ANGPTL4, GJA1, ALDOC, ENO2,CSGALNACT1, MXI1, INSIG2, PDK1, PFKP, PAM, ADM, OBSL1, NDRG1, HEY1, VLDLR, YEATS2, CXCR4, CAV1, ISG20, KDM3A, WISP2, TGFBI, DDIT4, PLAUR, ANG, SPRY1, STBD1, PGK1, SOX9, DSC2, ADORA2B, OPN3, VEGFC, PHLDA1, NR3C1, ATXN1, RNASE4, PPFIA4…
REACTOME_TCA_CYCLE_AND_RESPIRATORY_ELECTRON_TRANSPORT	-0.630117	-3.02199	0	0	141	115	SLC16A3, PDK1,SLC16A1, LDHA, NDUFS5, UCP3, UCP2, NDUFA7,NDUFA12, NDUFS4,UQCRBP1, PDK4, ATP5D, NDUFB7, SDHA, PDPR, NDUFB4,NDUFA13, NDUFA8,NDUFB10, COX5B, IDH3G, NDUFA1, ATP5O, UQCRHL, COX6B1, COX6C, COX7C, UQCRB, NDUFC1, NDUFV3, UQCRH, UQCR11, ATP5H, BSG,COX7A2L, ATP5I, NDUFB8, NDUFA2, COX4I1, IDH3B, NDUFV2, ATP5E, NDUFB5, IDH1, NDUFS6, NDUFB9, PDP1, NDUFA3, D2HGDH, UQCRC2, COX6A1,NDUFA11, NDUFS3,…
ZHOU_CELL_CYCLE_GENES_IN_IR_RESPONSE_6HR	0.61249	2.32011	0	0	85	82	SAP30, CDT1, E2F1, DTL, MCM7, UHRF1, FAM198B, GINS2, MCM5, RAD51, NCAPH2, CDK2, MYBL2, CENPK, PSMC3IP, RFC5, DSN1, BRCA1, FAM64A, KIFC1,KIAA0101, MCM2, HAUS8, TOPBP1, DNAJC9, KIF20A, CHAF1B, RFC4, GINS3, EXO1, MCM6, RTKN2, TTK, DLGAP5, DEK, CEP55, CCNA2, HMGB2, TRIP13, CDCA5, RANBP1, CDCA8, USP1, EZH2, NEK2, SULF2, WDHD1, E2F8, LMNB1, MAD2L1, NUSAP1, CENPA, RAD54L, H2AFX, KNTC1, HAUS3, RPA2, MCM3…
ELVIDGE_HIF1A_AND_HIF2A_TARGETS_DN	0.683888	2.67292	0	0	104	102	CA9, SPAG4, KRT15, EGLN3, HK2, NOL3, AHNAK2, ZNF395, EFNA3, SLC2A1, LOXL2, P4HA1, VEGFA, QSOX1, KDM4B, IGFBP3, TMEM45A, SFXN3, ANGPTL4, GJA1, ALDOC, ENO2, MXI1, INSIG2, PDK1, PAM, ADM, OBSL1, NDRG1, HEY1, VLDLR, YEATS2, CXCR4, CAV1, PTRF, GPRC5A, WISP2, ZNF654, PLAUR, ANG, STBD1, PGK1, SOX9, DSC2, VEGFC, RBPJ, DPYSL2, ATXN1, RNASE4, PPFIA4, LOX, FYN, GYS1, CCNG2, FAM13A, EGFR, CSRP2, PDGFB, LIMCH…
REACTOME_3_UTR_MEDIATED_TRANSLATIONAL_REGULATION	0.738607	2.92712	0	0	176	105	RPL4, EIF3D, RPL10A, RPL10, RPS8, RPL23A, RPL15, RPS24, RPL38, RPL12, RPL6, RPL22, RPL14, RPL11, RPL7A, RPL5, RPL19, RPL35A, RPS25, RPL32, RPL30, RPL3, RPS19, RPL17, RPL18, EIF3E, RPL27A, RPS4X, RPS3, PABPC1, EIF3H, RPL37, RPL31, RPL41, RPS2, RPL28, EIF4B, RPL37A, RPS23, RPL18A, RPS18, RPL13, RPL29, RPL23, RPL36, RPL34, RPS11, RPLP2, RPL24, FAU, RPL26, RPLP0, RPS20, RPS13, RPS15A, EIF2S3, RPL8, R…
ELVIDGE_HIF1A_TARGETS_DN	0.705805	2.72855	0	0	91	89	CA9, SPAG4, KRT15, EGLN3, HK2, NOL3, AHNAK2, ZNF395, EFNA3, OLFML2A, SLC2A1, LOXL2, P4HA1, QSOX1, KDM4B, IGFBP3, TMEM45A, SFXN3, ANGPTL4, GJA1, ALDOC, ENO2, MXI1, INSIG2, PDK1, PAM, ADM, OBSL1, B3GNT4, NDRG1, VLDLR, YEATS2, CXCR4, CAV1, ISG20, PTRF, WISP2, ANG, STBD1, PGK1, DSC2, VEGFC, RBPJ, NR3C1, ATXN1, RNASE4, PPFIA4, LOX, FYN, GYS1, FAM13A, EGFR, CSRP2, PDGFB, HCFC1R1, IGFBP5, P4HA2, ZNF292,…
REACTOME_ACTIVATION_OF_THE_MRNA_UPON_BINDING_OF_THE_CAP_BINDING_COMPLEX_AND_EIFS_AND_SUBSEQUENT_BINDING_TO_43S	0.664753	2.37441	0	0	84	57	EIF3D, RPS8, RPS24, RPS25, RPS19, EIF3E, RPS4X, RPS3, PABPC1, EIF3H, RPS2, EIF4B, RPS23, RPS18, RPS11, FAU, RPS20, RPS13, RPS15A, EIF2S3, RPS14, RPS5, RPS6, EIF3F, RPS16, RPS12, RPS17, RPS27A, EIF3B, EIF4A1, RPS10, RPS9, RPS15, RPSA, EIF4H, RPS21, RPS3A, RPS29, RPS7, EIF3G,EIF4EBP1, EIF4A2, EIF1AX, EIF2S1, RPS28, RPS26, EIF3I, EIF3C, EIF2S2, RPS27, RPS4Y1, EIF3A, RPSAP9, EIF3K, EIF4G1, EIF3J, EIF…
LEONARD_HYPOXIA	0.680804	2.33616	0	0	47	47	TGFA, HK2, PFKFB4, SAP30, STC2, SLC2A1, P4HA1, VEGFA, SLC16A3, MXI1, PFKP, HNRNPA1,C10orf10, GPRC5A, KDM3A, DDIT4, PGK1, SLC7A5, ADORA2B, SLC2A3, NR3C1, MUC1, CCNG2, ALDOA, EFNA1, PPP1R3C, PDGFB, P4HA2, BHLHE40, PHC2, BNIP3, NFIL3,SERPINE1, DUSP1, CDKN1B, JMJD6, JUNB, SIK1, RASGRP1, PLIN2, AK4, F3, FOSL2, CDKN1C, HOXA4, DDIT3, HOXA5
MOOTHA_VOXPHOS	-0.605378	-2.87081	0	0	87	84	NDUFA4L2, ATP5G2, CNOT7, TBCB, TONSL, COX7A1, TMCO6, MBD3, BCL2L1, NDUFA7, NDUFS4, SURF2, ATP5D, NDUFB7, SDHA, NDUFB4, NDUFA13, NDUFA8, COX5B, NDUFA1, ATP5O, COX6A2, COX6B1, COX6C, COX7C, BCS1L, UQCRB, NDUFC1, UQCRH, COX7A2, UQCR11, ATP5H, COX10, COX7A2L, ATP5I, NDUFB8, NDUFA2, COX4I1, COX11, ATP5E, UQCR10, NDUFB5, CYB5A, NDUFS6, COX15, NDUFA3, UQCRC2, COX6A1, NDUFS3, NDUFB6, NDUFS7, SURF1, ATP5L…
REACTOME_SRP_DEPENDENT_COTRANSLATIONAL_PROTEIN_TARGETING_TO_MEMBRANE	0.70464	2.77279	0	0	179	107	DDOST, RPL4, RPL10A, RPL10, RPS8, RPL23A, RPL15, RPS24, RPL38, RPL12, RPL6, RPL22, RPL14, RPL11, RPL7A, RPL5, RPL19, RPL35A, RPS25, RPL32, RPL30, RPL3, RPS19, RPL17, RPL18, RPL27A, RPS4X, RPS3, SSR2, RPL37, RPL31, RPL41, RPS2, RPL28, RPL37A, RPS23, RPL18A, RPS18, RPL13, RPL29, RPL23, RPL36, RPL34, RPS11, RPLP2, RPL24, FAU, RPL26, RPLP0, RPS20, RPS13, RPS15A, RPL8, RPS14, RPL7, RPL35, RPS5, SEC61G…
CHNG_MULTIPLE_MYELOMA_HYPERPLOID_UP	0.699114	2.4263	0	0	52	52	RPL4, RPL15, NPM1, RPL14, RPL7A, RPL35A, RPL32, FBL, RPS19, RPL18, RPL27A, RPS3,RSL24D1, RPL37, RPL28, RPS23, EEF1G, RPL29, RPL36, RPLP2, RPL24, EEF2, RPS13, RPS14, RPL35, RPS6, RPS16, RPS17, UBA52, RPL13A, RPLP1, RPS9, RPS15, RPSA, EEF1B2, IMP3, DHPS, EIF3G, EIF4A2, UBA7, RPL21, QARS, USP3, HERC1,SNRNP70, KLK3, CLTA, NCBP2, EIF3K, EIF3J, MRPL34, SCAMP5
KEGG_BUTANOATE_METABOLISM	-0.741335	-2.71335	0	0	34	31	OXCT2, ACSM1, ACSM5, ACSM2A, AACS,AKR1B10, GAD1, ACADS,ALDH1B1, ALDH2, ABAT,ALDH7A1, ACAT2, L2HGDH, HADHA, HMGCL, ECHS1, EHHADH, HMGCS1, BDH2,ALDH3A2, PDHB, ACSM3, BDH1, HMGCS2, HADH, OXCT1, PDHA1,ALDH9A1,ALDH5A1, ACAT1
REACTOME_BRANCHED_CHAIN_AMINO_ACID_CATABOLISM	-0.819988	-2.56591	0	0	17	17	BCAT1, BCKDHA, BCAT2, ACADSB, HIBCH, IVD, ALDH6A1, BCKDHB,HSD17B10, AUH, MCCC2, ACAD8, MCCC1, DBT, ACAT1, HIBADH, DLD
REACTOME_RESPIRATORY_ELECTRON_TRANSPORT_ATP_SYNTHESIS_BY_CHEMIOSMOTIC_COUPLING_AND_HEAT_PRODUCTION_BY_UNCOUPLING_PROTEINS_	-0.670302	-3.05804	0	0	98	80	NDUFS5, UCP3, UCP2, NDUFA7,NDUFA12, NDUFS4,UQCRBP1, ATP5D, NDUFB7, SDHA, NDUFB4,NDUFA13, NDUFA8,NDUFB10, COX5B, NDUFA1, ATP5O, UQCRHL, COX6B1, COX6C, COX7C, UQCRB, NDUFC1, NDUFV3, UQCRH, UQCR11, ATP5H,COX7A2L, ATP5I, NDUFB8, NDUFA2, COX4I1, NDUFV2, ATP5E, NDUFB5, NDUFS6, NDUFB9, NDUFA3, UQCRC2, COX6A1,NDUFA11, NDUFS3, NDUFB6, NDUFS7, ATP5L, ETFB, NDUFC2,NDUFAB1, COX8A,NDUFA10, UQCRC1, ATP5J2, ATP…
STEIN_ESRRA_TARGETS_UP	-0.434544	-2.42154	0	0	388	367	LEFTY1, EGLN3, VEGFA, FDXR, FSCN1, PPP1R13L, SLC16A3, ALDOC, MARCH3, MMP9, PFKP, MATK, TEX2, GM2A, CYTH1, EPAS1, SLC16A1, RNASET2, TCIRG1, TRPC1, RNF34, OPN3, INPP1, ETS2, GAS2L1,ST6GALNAC4, KCNN4, CALU, SPINT1, HIGD1A, MAP1B, TMEM132A, RBM7, GAS6, TMC6, ARL2BP, PCGF1, TWF2, RNF139, FAM127A, RALA, SCN1B, LETMD1, RAB35, ABCB9, NDRG4, EGLN1, IQSEC1, AMPD3, DSG2, ABCB7, GPI, PPIC, KIAA0040, PGM1, IV…
SCHUETZ_BREAST_CANCER_DUCTAL_INVASIVE_UP	0.519424	2.26557	0	3.39e-05	351	338	PLXDC1, LRRC17, AHNAK2, LOXL2, TGFB1I1, PRKCDBP, IGFBP3, COL8A2, COL11A1, LAMA4, OLFML2B, COPZ2, FXYD5, EFEMP2, SLC16A3, PTPRM, GPNMB, EDNRA, ALOX5, TMEM204, GRK5, SSPN, ESM1, NDN, CELF2, TMEM47, PECAM1, MMP11, PAM, COL5A2, CPA3, RCBTB2, MEF2C, COL4A1,SERPINH1, TCF4, RASSF2, COL4A2, LDB2, PMEPA1, ENTPD1, HEY1, FAP, CLEC2B, NNMT, MAP4K4, LGALS1, PTRF, GIMAP4, JAM3, FLI1, ERG, LHFP, ANXA1, TUBB6, T…
HOLLEMAN_VINCRISTINE_RESISTANCE_ALL_DN	0.802331	2.28027	0	3.5e-05	19	19	RPL10, RPL23A, RPS24, RPL12, VIM, SCNM1,RASGRP2, RPL31, RPS2, RPLP2, CD44, TMSB10, RPS15A, RPS12, LSM7,ATP13A2, INTS1, HMGB1, HNRNPU
LIM_MAMMARY_STEM_CELL_UP	0.518437	2.29209	0	3.61e-05	489	443	GPR87, GJC1, PDLIM4, COL17A1, NPTX2, PGF, SOX11, GPR176, COL23A1, TRIM9, FJX1, CSPG4, LAMA3, NGF, STAC2, TTYH2, FXYD1, RFX2, RASL12, SLC27A3, TGFB1I1, PKP1, SCN4B, IGFBP3, CYGB,ARHGEF25, LAMB3, CHSY3, SKI, NETO2, GJA1, PLA2G7, DUSP7, FBLN7, PRDM1, SYDE1, VIM, PLEKHA4, TMEM204, PHLDA3, NDN, ITGB4, MCAM, TMEM47, PTPRE, COL5A2, MEF2C, ETS1, CDH13, BMP1, POPDC2, COL4A1,SERPINH1, TCF4, COL4A2, THSD1, …
WOO_LIVER_CANCER_RECURRENCE_UP	0.583835	2.29211	0	3.74e-05	105	101	LPCAT1, HK2, EPHA3, CRIP1, CCND3, QSOX1, TGFB1, IGFBP3, CCNI, JAG2, COL11A1, LAMA4, TREM2, BHLHE41, ENO2,CSGALNACT1, PFKP, MEF2C, TGFB2, PMP22, RGS10, JAG1, EVL, PLAUR, TPBG, TMSB10, SOX9, CD24, PDGFA, CCND2, COL1A2, COL1A1, EFHC1, DUSP4, DPYSL2, FLNA, LOX, MARCKS, ALDOA, ARHGEF2, TPM2, DDR1, PTMA, MGP, TEAD4, PLAGL1, LAMA5, EXT1, PPT1, VEGFB, MICAL1, S100A6, SEMA6A, DPYSL3, ZEB2, POSTN, NOTCH2, …
CHANG_CYCLING_GENES	0.564331	2.29406	0	3.87e-05	148	142	AMD1, RFC2, TUBB4B, E2F1, CDCA7, ANLN, UHRF1, GINS2, FAM111B, MCM5, SDC1, ARL4A, TIMP1, FAM64A, KIFC1, ASF1B, CDC6, UBE2C, KIAA0101, FANCG, EFHC1, TUBB, PWP1, WDR76, MELK, LYAR, KIF20B, CCNB2, KDM5B, PTTG1, RFC4, MET, GINS3, EXO1, MCM6, TPX2, ATAD2, GTSE1, DEPDC1, CENPM, MND1, CENPF, FOXM1, DLGAP5, CCNA2, RRM2, TOP2A, TRIP13, SKA3, PRIM1, PBK, CDC25C, CDCA5, FAM72B, CDCA8, PLK1, BIRC5, USP1, NUF2…
REACTOME_INSULIN_RECEPTOR_RECYCLING	-0.672041	-2.31178	0	4.96e-05	23	22	TCIRG1, INSR,ATP6V0A2,ATP6V1G1,ATP6V1G2,ATP6V1B2,ATP6V0E1,ATP6V1E2, ATP6V0C,ATP6V1G3,ATP6V1B1,ATP6V0D2,ATP6V0A4, ATP6V1F,ATP6V1C1,ATP6V1C2, ATP6V0B,ATP6V1E1, ATP6V1D,ATP6V0D1, ATP6V1H, ATP6V1A
VART_KSHV_INFECTION_ANGIOGENIC_MARKERS_UP	0.553007	2.25162	0	6.57e-05	165	148	PLXDC1, PGF, EPHA3, PDGFD, EFNA3, F2RL3, VEGFA, DLL4, TGFB1, JAG2, SFRP2, CALCRL, MMP9, ANGPT2, PECAM1, CXCL5, SYN1, ADM, COL4A2, TNFSF12, ATG9B, HEY1, CXCR4, FLT1, S1PR1, FRZB, TGFB3, NOTCH4, TNNT1, ROBO4, JAG1, FLT4, SPARC, PTEN, PLAUR, OSMR, NRP2, TIMP1, PROM1, FZD9, VEGFC, EFNB2, PDGFA, TIMP2, KDR, CAST, NRP1, ENG, COL15A1, TIE1, THBS2, COL18A1, EPHA10, EFNA1, LAMA5, F2R, STAB1, CCL5, PDGFB, …
GUENTHER_GROWTH_SPHERICAL_VS_ADHERENT_DN	0.737628	2.23108	0	9.29e-05	26	26	CCND3, TGFB2, CAV1, ITGB1, PLAUR, CD44, PRSS23, CASP1, FN1, CTSD, NR3C1, ANXA5, NRP1, MET,COL18A1, TGFBR2,IL13RA1,MEIS3P1, PXN, MVP, GAA, VCL, CD46, CD59, PRKCD, NQO1
KANG_DOXORUBICIN_RESISTANCE_UP	0.635458	2.23694	0	9.57e-05	54	52	KIF4A, PRC1, TYMS, FANCI, ASF1B, CDC6,KIAA0101, NCAPG, PLK4, MKI67, RFC4, TPX2, ATAD2, CENPM, FOXM1, RRM2, HMGB2, TOP2A, ASPM, PBK, CDCA8, PLK1, BIRC5, NCAPG2, DSCC1, HJURP, BUB1, LMNB1, MAD2L1, NUSAP1, BARD1, CENPA, OIP5, RRM1, BUB1B, CDC20,RAD51AP1, CDKN3, POLQ, ZWINT, FOSB, TK1, ABCC1, POLA2, HMMR, AURKA, MCM4, GINS1, WHSC1, CDK1, DTYMK, NQO1
BURTON_ADIPOGENESIS_5	-0.462558	-2.28594	0	9.61e-05	126	115	HK2, CBR3, PTRF, TBL2, TIMM9, IGF2, SIPA1, LMAN2, GYS1, ALDOA, PHB2, ADAM12, C3, GPI, IFNGR1, TMEM97, LRRC59, PDIA6, PSMA1, BCAP31, JAGN1, FABP5, EXTL3, TOB1, SORBS1, ROMO1, ATL2, C16orf74, TOMM40, NRIP1, MRPS2, XBP1, PEX11A, GNPAT, G6PD, PIM3, CEBPA, PPA1, DNAJB9, FABP4, AGT, MGST3, SLC1A5, MRPL20, LIPE, SCD, MAPK6, NDUFA8, NDUFB10,HIST1H2BC, TYSND1, MKNK2, MRPS34, MRPL12, MRPS26, COX17, UQCRHL,…
HOLLEMAN_ASPARAGINASE_RESISTANCE_B_ALL_UP	0.7281	2.22181	0	0.0001084	26	25	LPCAT1, RPL4, EIF3D, RPL6,GLTSCR2, RPL11, RPL7A, RPL5, RPL3, FBL, RPS3, EIF3L, EEF1G,CLEC11A, IGFBP7, RPS5, RPL13A, EEF1B2, TPM4, NTRK3, FAM46C, CCDC69, EIF3K, GATA3, BCR
LEE_LIVER_CANCER_HEPATOBLAST	0.821919	2.22196	0	0.0001112	16	16	LAMA3, VIM,KRT19,PLAUR, CD44,TIMP1, KRT7,CCND2, EZR, TNC, FOS, IL6, MMP1, F3,NR4A1,PTGS2
ANASTASSIOU_MULTICANCER_INVASIVENESS_SIGNATURE	0.619762	2.22443	0	0.0001141	64	63	LOXL2, COL11A1, OLFML2B, COPZ2, EDNRA, MMP11, COL5A2, FAP, LGALS1, COL6A2, SPARC, COL5A1, RAB31, PDGFRB, BGN, LRRC15, RCN3, ITGBL1, FN1, COL1A2, COL1A1, PCOLCE, LOX, TNFAIP6, CTSK, INHBA, NID2, ACTA2, THBS2, SULF1, VCAN, NTM, COL3A1, ADAM12, PRRX1, AEBP1, FBN1, MMP2, POSTN, COL6A3, CDH11, COMP, GLT8D2, COL10A1,CRISPLD2, NUAK1, MXRA5, MFAP5,SERPINF1, TIMP3, THY1, SFRP4, SNAI2, ASPN, EPYC, GREM1, L…
REACTOME_METABOLISM_OF_MRNA	0.522157	2.22778	0	0.0001172	284	207	RPL4, RPL10A, RPL10, RPS8, RPL23A, RPL15, RPS24, RPL38, RPL12, EXOSC2, RPL6, RPL22, RPL14, RPL11, RPL7A, RPL5, RPL19, RPL35A, RPS25, RPL32, RPL30, RPL3, RPS19, RPL17, RPL18, RPL27A, EXOSC5, RPS4X, RPS3, PABPC1, RPL37, RPL31, RPL41, RPS2, RPL28, EIF4B, RPL37A, RPS23, RPL18A, RPS18, RPL13, RPL29, RPL23, RPL36, RPL34, RPS11, RPLP2, RPL24, EXOSC9, SMG8, FAU, RPL26, RPLP0, RPS20, RPS13, RPS15A, RPL8, …
FLECHNER_BIOPSY_KIDNEY_TRANSPLANT_REJECTED_VS_OK_UP	0.585361	2.23035	0	0.0001205	87	85	INPP5D, CCND3, SFN, ALDOC, IL4R, MMP9, CELF2, GMFG, LGALS9, RASSF2, ENTPD1, CXCR4, GAPDH, ISG20, UBC, RGS10, APOC1, GBP2, RAB31,KIAA0922, IFITM1, IL10RB, ITGB2, HCLS1, TYROBP, FCGR3A, LILRB4, TYMP, FCER1G, LAPTM5, LY86, PSMB8, CCL5, HLA-F, UBE2L6, FCGR1A, CD52, S100A4, ADAM15, COL6A3, LST1,TNFRSF1B, C1QB, RAC2, CD53, RHOH, CD2, CD8A, ACTB, CD48, CORO1A, AOAH, CD3D, PIM2, DOCK2, CSTA, FABP5, CD27,…
WINTER_HYPOXIA_UP	0.580207	2.21623	0	0.0001322	92	87	CA9, KRT17,NDUFA4L2, KCTD11, PGF, PFKFB4, PPARD, SLC2A1, ANKRD37, TUBB4B, P4HA1, VEGFA, PYGL, ANGPTL4, PTGFRN, ANLN, TPI1, NDRG1, GAPDH, S100A3, CDCA4, SLC16A1, LDHA, TPBG, PGK1, TANC2, TPD52L2, ADORA2B, PPP4R1, ALDOA, TEAD4, RUVBL2, TMEM189, MIF, PGAM1, CNIH4, RNPS1, BNIP3, S100A10, SLC6A8, DPM2, B4GALT2, HAUS2, VEZT, CORO1C, TMTC3, TRMT5, EIF2S1, NUDT15, METTL22, NME1, RNF24, GEMIN2, TMEM30B, R…
TIEN_INTESTINE_PROBIOTICS_6HR_UP	0.618913	2.21306	0	0.0001513	55	55	RPL4, ADCY3, RPL23A, RPS24, RPL5, RPS19, RPL27A, GAPDH, UBC, RPL41, RPS2, EIF4B, RPL37A, RPS23, EEF1G, RPL13, RPL23, RPS11, PGK1, CDC5L, RPLP0, PHLDA1, RPS14, RPS6, RPS17, KLF5, RPS3A, RPL9, EEF1A1, SORL1, MYC, RPS7, B2M, CALR,ALDH3B1, TPT1, ACTB, RPL39,HNRNPH1, PPIA, YWHAE, CRCP, HMGB1, RPS27, EIF5A, PRNP,C6orf62, SEL1L3, MMP24, FTL, PTP4A2, TXN,FAM120A, HSPA8, RAB2A
REACTOME_GASTRIN_CREB_SIGNALLING_PATHWAY_VIA_PKC_AND_MAPK	0.540919	2.21459	0	0.0001549	205	148	KISS1R, NMB, MCHR1, NTSR1, NMU, ADRA1B, DGKD, GPR4, DGKA, OPN4, F2RL3, PTAFR,ARHGEF25, EDN1, NMUR1, EDNRA, HRH1, GRK5, RPS6KA2, RASGRP2, GNB1, P2RY1, ANXA1, TBXA2R, PRKCH, ITPR3, BDKRB1, LPAR6, MAPK3, BDKRB2, EDNRB, GNG10, TRPC6, GNG11, DAGLB, GNB4, CYSLTR1, TACR2, LPAR2, GNG2, EGFR, RGS19, P2RY6, MAPK7, PIK3R3, GNGT1, SAA1, MGLL, F2R, PTGFR, GNB2, GPR132, GNRH1, LTB4R, GNA15, EDN2, OXTR, NRAS, C…
HARRIS_HYPOXIA	0.594835	2.20864	0	0.0001687	81	77	CA9, TGFA, PGF, HK2, SLC2A1, P4HA1, VEGFA, CP, TGFB1, IGFBP3, EDN1, VIM, ANGPT2, PFKP, APEX1, ADM, GAPDH, FLT1, TGFB3, EPAS1, COL5A1, LDHA, PLAUR, PGK1, IGF2, SLC2A3, EPO, CCNG2, ALDOA, CD99, PDGFB, MIF, MMP13, ENO1, TAGLN,BHLHE40, BNIP3, BNIP3L, CDKN1A, EDN2, TF, HK1, TGM2, HDAC9, CDKN1B, JUN, PFKL, IGFBP2, XRCC5, SAT1, STC1, XRCC6, BIK, IGFBP1, FOS, TFRC, HMOX1, IL6, HGF, TFF3, ENPEP, L1CAM, F3…
REACTOME_EXTRACELLULAR_MATRIX_ORGANIZATION	0.593239	2.21162	0	0.0001725	87	73	COL21A1, COL5A3, COL17A1, COL23A1, COL8A2, COL11A1, TPSAB1, MMP9, MMP11, COL5A2, BMP1, MMP15, COL4A1,SERPINH1, COL4A2, PLOD1, COL8A1, MMP16, PLOD3, P4HB, COL6A2, COL5A1, MMP14, TIMP1, COL1A2, COL1A1, PCOLCE, TIMP2, PLOD2, COL6A1, COL15A1, COL13A1, CRTAP, PPIB, COL3A1, ADAMTS2, MMP13, COL7A1,ADAMTS14, MMP7, MMP2, COL6A3, MMP25, COL25A1, COL10A1, COL9A1, CTSG, COL11A2, COL16A1, COL27A1, COL12A1, TL…
VERRECCHIA_EARLY_RESPONSE_TO_TGFB1	0.606294	2.19522	0	0.0002033	58	58	LRRC17, IGFBP3, LAMA4, MMP16, HSPG2, SPARC, CD44, MMP14, TIMP1, FN1, COL1A2, ITGA3, RHOG,MARCKSL1, ITGB2, NID1, PCDHGC3, COL6A1, TCF7L2, VCAN, ADAM9, RPSA, COL3A1, ARHGDIA, MMP19, ZYX, RHOA, RHOB, LRP1, RND3, IGFBP5, ITGB5, NOTCH2, COL6A3, NME2, CYTH2,SERPINE1, IGFBP2, NME1, TIMP3, DVL1, SSR1, RHOC, PXN, CDH6, ICAM1, MMP3, IGF2R, APC, WNT2B, JUP, CD82, CD59, EPHB3, RHOQ, PLAT, BSG, PAK1
KOBAYASHI_EGFR_SIGNALING_24HR_DN	0.509679	2.20024	0	0.0002076	251	242	TGFA, CCND1, RFC2, CCND3, CDT1, TUBB4B, NETO2, E2F1, ENO2, TCN1, DTL, SLC43A3, MCM7, KIF4A, PA2G4, GINS2, MCM5, RAD51, CHAF1A, CDK2, CDC45, MYBL2, TUBB6, CDCA4, CDC42EP1, PSMC3IP, RNASEH2A, PRC1, TYMS, PKMYT1, AXL, SOX9, RFC5, DSN1, BRCA1, FAM64A, ADORA2B, FANCI, ASF1B, CDC6, UBE2C, MCM10, MCM2, PHLDA1, TUBA1B, CKLF, DUSP4, TUBB, BLM, GJB3, SPRED2, NCAPG, MELK, POLE2, DNAJC9, CKS1B, SNRPD1, PLK4,…
REACTOME_BIOLOGICAL_OXIDATIONS	-0.462597	-2.26474	0	0.0002094	139	115	NNMT, GGT7, SMOX, TBXAS1, FMO3, CYP2J2, CYP1B1,CYP2C18, GGT5, PAPSS1, CYP2C8, CYP2R1, PTGIS, PTGS1,CYP21A2, CYP2A6, CNDP2,SULT1A3, GSTP1, GSTM1, ACSM1, COMT, MAT2A, GSTA4, MGST2,CYP4F11, GSTM5,SULT2A1, CYP8B1, PTGS2, GGT1,SULT4A1, UGDH, GSTO2, MGST3, POMC, CYP2E1, CYP2S1,CYP46A1, GSTA2, CYP4B1,CYP26B1, CYP4F2, UGT1A4, UGT1A7, CYP3A5,CYP27A1,CYP27B1, UGP2,SULT1A1, UGT1A9, CYP2U1, MAT1A, ADH6, GSTA…
KIM_HYPOXIA	0.74272	2.20185	0	0.0002121	25	24	PDLIM4, SAP30, SLC2A1, VEGFA, IGFBP3, ANGPTL4, ALDOC, ENO2, PFKP, TPI1, LDHA, GYS1, CCNG2, ALDOA, BACH1, BNIP3, BNIP3L, AMPD3,SERPINE1, JUN, ICAM1, IL6, PLIN2, F3
MOOTHA_PGC	-0.390468	-2.24297	0	0.000219	420	398	VEGFA, TMEM45A, ULK1, EDNRA, PYGM, PFKP, TPI1, POPDC2, MRPS17, GAPDH, EIF3L, UBC, CDR2L, LDHA, DDIT4, RAB31, PGK1, PRSS23, PDGFRB, SNW1, TCIRG1, NFIX, CRMP1, CDK18, PHLDA1, NECAP2, PCOLCE, PLEKHO1, IFI16,ST6GALNAC4, BID, GYS1, INHBA, CX3CL1, NRP1, TYMP, SPINT1, LRP5, GUK1, PHB2, GNA13, PDCD6, FBRS, RUVBL2, FOXM1, TWF2, RRM2, PGAM1, LPGAT1, RAMP3, ENO1, SCN1B, KCNN1, COL7A1, ABCA2, P4HA2, MYH11, N…
REACTOME_CHOLESTEROL_BIOSYNTHESIS	-0.68223	-2.25055	0	0.0002257	24	21	FDPS, NSDHL, IDI2, SQLE, DHCR24, PMVK, LBR, MVD, GGPS1, HMGCR,HSD17B7, EBP, MSMO1, DHCR7, LSS, MVK, HMGCS1, FDFT1, IDI1,CYP51A1, TM7SF2
POMEROY_MEDULLOBLASTOMA_DESMOPLASIC_VS_CLASSIC_DN	0.619727	2.19338	0	0.0002434	59	56	NMU, CCND3, QSOX1, RPL10A, NFATC4, RPL35A, TCF4, CXCR4, RPS23, RPS18, RPL34, RPS11, LAMC1, RPL24, LMO4, COL1A2, COL1A1, RPL7, GLI1, NID1, RPS17, CYFIP1, RPS10, VCAN, MGP, EEF1B2, COL3A1, LTBP2, RND3, IGFBP5, RPS29, RPL9, BCL2, CNR1, TPT1, PBX3, SCG5, RPL21,TMSB15A, RPL39, RPL36A, NTRK3, NDP, FIG4, IRF8, C1S, NFATC3,SHROOM2, PTCH1, TCF12, APOD,ALDH1A3, MYCN, GCNT2, UCHL1, TFDP2
CROMER_TUMORIGENESIS_UP	0.609149	2.16524	0	0.0002659	63	55	KRT17, LAMA3, LAMB3, COL11A1, MMP9, MMP11, COL5A2, BMP1, COL4A1, COL4A2, PXDN, FAP,APOBEC3C, PLOD3, SPARC, PLAUR, LRRC15, CHST2, SLC2A3, FN1, COL1A2, COL1A1, PTK7, ACTN1, IFI6, LAMC2, SMOX, COL3A1, MYO1B, POSTN, OASL,SERPINE1, MFAP2, TNFAIP3, CXCL1, THY1, MMP12, TNC, NELL2, NTS, CCL3, RBP1, IL6, LUM, MMP3, MMP1, PDPN, IL1B, SPP1, G0S2, ODC1, UCHL1, PLAU, PPFIA1, PFN2
LU_TUMOR_ANGIOGENESIS_UP	0.719056	2.1674	0	0.0002711	25	25	VEGFA, JAG2, EDN1, MMP9, HEY1, CXCR4, JAG1, CD44, PDGFA, CCND2,TNFAIP6, FYN, NOTCH1, TYMP, VCAN, PTK2, EZH2, STC1, FGF18, VAV2, FGFR1, CCNE1, E2F3, ITGAV, SPP1
RUIZ_TNC_TARGETS_DN	0.535361	2.17363	0	0.0002764	142	135	POLR1E, STC2, TUBB4B, SLC7A1, E2F1, DTL, MCM7, DMD, PFKP, MRTO4, CAV2, GINS2, TPM1, MCM5, NXN, CAV1, PTPRF, EFEMP1, GPRC5A, CDC45, TUBB6, RFTN1, TYMS, CD44, MICAL2, SLC7A5, MYOF, FANCI, ASF1B, CDC6, UBE2C, PEA15, MCM10, ITGBL1, CD24, MCM2, BLM, MELK, DNAJC9, CCDC86, RFC4, MET, GINS3, CCNE2, EXO1, AURKB, MCM6, EGFR, ATAD2, POP7, SLC38A1, FOXM1, CCNA2, YWHAH, RRM2, TRIP13, PRIM1, PBK, EXOSC8, BIRC5…
KAAB_HEART_ATRIUM_VS_VENTRICLE_DN	-0.406136	-2.2319	0	0.0002766	261	247	AMD1, SMYD2, ALPK3, PTPRM, ALDOC, PFKP, PDLIM1, CDH13, CHN1, TNNT1, PCSK6, ZHX2, STK39, SLC1A3, TMEM159, BDNF, CCND2, GYS1, PLN, GNLY, CXADR, CSRP2, GPC1, TMC6, SORBS2, KCNJ8, LIMCH1, TWF2, CAPNS1, FAM127A, PDE3A, LDB3, IFI27, NDRG4, PPFIBP1, RAPGEF2, BNIP3, PPP2R5C, FEM1C, ABCC9, FHL2, PGM1, IVNS1ABP, OXA1L, NUAK1, METAP1, MYL12A, MAP3K5, GNAS, UBAC1, NLGN1, MAP4, RASSF9, HRAS, ITGA9, CD36, DIO2…
DELYS_THYROID_CANCER_UP	0.484256	2.16244	0	0.0002811	443	429	NMB, DAPK2, KRT17, PDLIM4, NMU, TGFA, HEY2, CCL18, KRT15, NPTX2, MAP2, ECE1, DDB2, CCND1, TNFRSF10C, AHNAK2, PTP4A3, MALL, FJX1, PTPRU, LOXL2, LGALS3, BICD1, QSOX1, IL1RAP, ATP11A, IGFBP3, INHBB, SFN, STMN2, LAMB3, COL11A1, SLC17A9, ANXA2P1, GALNT12, FXYD5, TPSB2, GJA4, ARHGDIB, TREM2, PLXND1, PRDM1, ALOX5, LSR, DMD, SLC6A1, PTPRE, MMP11, ANXA2, PLCD1, COL5A2, CPA3, PDLIM1, RUNX1, MDK, RPS6KA2, D…
BURTON_ADIPOGENESIS_3	0.555846	2.17832	0	0.0002819	101	100	DTL, CDCA7, MCM7, KIF4A, IMPDH2, MCM5, RAD51, CDC45, TUBB6, CENPK, PRC1, TYMS, OSMR, RFC5, BRCA1, ASF1B, CDC6, LMO4,KIAA0101, MCM10, MCM2, TOPBP1, CKS1B, NID1, KIF20A, CCNB2, CX3CL1, KLF5, MKI67, LRP5, CCNE2, VCAN, TTK, CSRP2, CCNB1, GAS6, PTGFR, TCF19, DLGAP5, RRM2, HMGB2, TOP2A, TRIP13, NASP, PRIM1, CDCA8, PLK1, BIRC5, USP1, NCAPH, ADAM8, FEN1, EZH2, BUB1, CDC7, MAD2L1, NUSAP1, KIF2C, POLA1, CC…
KONG_E2F3_TARGETS	0.557993	2.15772	0	0.0002957	97	91	HLX, RPL12, TAF1D, CENPH, RPL3, RAD51,PSORS1C2, CENPK, PRC1, TYMS, SYCE2, BRCA1, ASF1B, CDC6, UBE2C,KIAA0101, NCAPG, MELK, MYB, KIF20A, CHAF1B, MKI67, TPX2, DEPDC1, CCNB1, CENPF, FBXO45, DLGAP5, CCNA2, HMGB2, TOP2A, NASP, PRIM1, PBK, CDCA5, PLK1, USP1, NUF2, NCAPG2, NCAPH, IQGAP3, FEN1, EZH2, BUB1, CDC7, LMNB1, NUSAP1, KIF2C, CENPQ, RAD54L, H2AFX, CCNF, FIGNL1, BUB1B, PSIP1, CDC20,RAD51AP1, ERCC6…
JOHANSSON_GLIOMAGENESIS_BY_PDGFB_UP	0.599858	2.15277	0	0.0003485	58	57	CCND1, EPN2, FRMD8, MCAM, HNRNPA1, TPM1, LGALS1, TAGLN2, PPP1R18, CHST11, RPLP0, FN1, MCM2, CCND2,MARCKSL1, MARCKS, CD63,PPP1R14B, MKI67, RPS27L, SDC3, RRM2, HMGB2, TOP2A, PBK, EEF1A1, PLK1, PPFIBP1, SULF2, B2M, RNF213, TPM4, KLF6, CDK4, YBX1, CDC20, CD9, MCM3, PCNA, HSPA14,C1orf159,CDC42SE1, STAT3, FOS, HMOX1, NIN, CDK1,TMEM176B, OST4, DYNLT1,HLA-DRB1, REV3L, FTL,SERPINE2, SPP1, PDGFRA, DBI
MOOTHA_TCA	-0.725387	-2.20717	0	0.0003723	16	16	RPL18A, SDHA, IDH3G, IDH3B, OGDH, MDH2, CS, ACO2, IDH2, SDHB,SUCLG1, IDH3A, SDHC,SUCLA2, SDHD, FH
RICKMAN_METASTASIS_DN	0.50249	2.1374	0	0.0004185	261	238	KRT17, FXYD3, NDUFA4L2, SNX33, S1PR5, AHNAK2, MALL, TBC1D2, C15orf39, SLC2A1, SLC27A3, PKP1, PTAFR, SFN, PKP3, PML, SLC16A3, DUSP7, PHLDA3, ITGB4, PDLIM1, NDRG1, SH3GL1, MPZL2, MEF2D, MOB3A, SDC1, SEMA3F, MEGF11, TBC1D22A, TAGLN2, CDCP1, MYO1E, RALGDS, LMNA, GBP2, PTGIR, LCP2, CD44, ARF1, EHBP1L1, ATP2B4, RHOV, CASP1, TRIM29, IFITM1, LOC154761, RHOG, IFI16, GAS2L1, GJB3,ST6GALNAC4, BICD2, S100A16…
ISHIDA_E2F_TARGETS	0.619613	2.13559	0	0.0004299	53	50	CDT1, LIG1, CDCA7, MCM7, ANLN, RPA1, RAD51, CDK2, PRC1, TYMS,CDKN2C, ASF1B, CCNB2, RB1, NDC80, MKI67, PTTG1, AURKB, CCNB1, CCNA2, RRM2, HMGB2, TOP2A,TRIP13, PRIM1, NCAPH, FEN1, EZH2, BUB1, E2F8,NUSAP1, RRM1, CDC20, MCM3, DBF4, PCNA, RFC3, TK1,DCTPP1, DUT, UBE2T, CDK1, CCNE1, SMC2, LBR, KPNA2, DNA2, STMN1, SLBP, HMGB3
CROONQUIST_NRAS_SIGNALING_DN	0.575075	2.13455	0	0.0004594	72	72	PTP4A3, MCM7, CHAF1A,APOBEC3C, MYBL2, CDC6, UBE2C,KIAA0101, MCM2, CKS1B, CCNB2, PLOD2, PLK4, NDC80, MKI67, PTTG1, RFC4, EXO1, AURKB, TPX2, CCNB1, TRAIP, FOXM1, CCNA2, WEE1, HMGB2, TOP2A, TRIP13, NASP, CDC25C, PLK1, NCAPH, LMNB1, KIF2C, CENPA, SBNO2, H2AFX, OIP5, POLD1, BUB1B, CDC20, CDKN3, MCM3, SMC4, SNRPA1, CHEK2, SPC25, FADS3, ZWINT, STIL, PCNA, RFC3, TK1, CHEK1, DUT, KIF11, AURKA, MCM4, GINS1…
REACTOME_PEROXISOMAL_LIPID_METABOLISM	-0.674921	-2.18681	0	0.000483	21	20	FAR2, ABCD1,SLC25A17, GNPAT, FAR1, ACOX2, SLC27A2, AGPS, IDH1, HACL1, ACOX3, ACAA1, CRAT, PHYH, ACOX1, ACOT8, AMACR, CROT, SCP2, HSD17B4
NAKAYAMA_SOFT_TISSUE_TUMORS_PCA2_UP	0.56672	2.13382	0	0.0004879	87	84	NPTX2, AHNAK2, EFNA3, COL11A1, PLP2, SLC16A3, ENO2, FOXF2, ROR2, TPBG, MICAL2, SLC7A5, NRP2, UBE2C,KIAA0101, SV2A, CDH3, MELK, PRPH, KIF20A, CCNB2, INHBA, MKI67, TPX2, GTSE1, CCNB1, SHOX2, CENPF, DLGAP5, CEP55, CCNA2, RRM2, TOP2A, ASPM, PBK, LEF1, CRLF1, CDCA8, BIRC5, HJURP, NCAPH, BUB1, NEK2, CDH11, NUSAP1, KIF2C, FZD1, CENPA, GLT8D2, CDC20, CDKN3, SCG5, HMGA2, MAGEA6, WISP1, FGFR3, PSD3, TNC, C…
LANDIS_ERBB2_BREAST_PRENEOPLASTIC_DN	-0.533266	-2.18355	0	0.0005155	55	51	TMEM43, RAB34, COL6A3, PGM1, HTRA1,EIF4EBP1, PTPRB, CD36, ZNF703, IGFBP6, UCK1, GPD2, CIDEC, GNAI1, NR1H3, GYG1, CHCHD10, PPP2R5A, CES3, GBE1, ADIPOR2, MKNK2, NPC2, GDPD3, LPIN1, BCAT2, DGAT1, UQCR10, GPX3, APLP2, ALAD, ETFB, NDUFAB1, GPAM, ABHD5, DHRS7, CXCL12, ACAA2, NDUFV1, GHR, ATP1B3, BCKDHB, GSTZ1, ST3GAL6, CPT2, SCP2, PDHA1, HADHB, MCCC1, DECR1, CHPT1
KEGG_DRUG_METABOLISM_CYTOCHROME_P450	-0.501335	-2.1843	0	0.0005291	72	61	GSTT2, FMO3,ALDH3B1,CYP2C18, CYP2C8, CYP2A6, GSTP1, GSTM1, GSTA4, MGST2,UGT2B15, GSTM5, GSTM2,UGT1A10, GSTO2, MGST3, GSTT1, CYP2E1, GSTA2, UGT1A4, UGT1A7, CYP3A5, UGT1A9, ADH6, GSTA1, FMO1,UGT2B10,ALDH1A3, GSTO1, UGT1A3, UGT1A8, MAOB, UGT1A1, UGT2A1, GSTM3, GSTM4, CYP2D6, ADH1A, UGT2B4, CYP2B6, UGT2B7, CYP3A4, FMO4, ADH1B, CYP3A7, CYP1A2, AOX1, MGST1, ADH1C,ALDH3A1,ALDH3B2, ADH4, UGT2A3, GSTK1, U…
KEGG_PROXIMAL_TUBULE_BICARBONATE_RECLAMATION	-0.656027	-2.17151	0	0.0005319	23	21	ATP1A2, ATP1B2, GLS2, SLC38A3,SLC25A10, ATP1A3, SLC4A4, PCK2, ATP1A1, CA4, SLC9A3, PCK1, GLUD2, GLUD1, ATP1B3, AQP1, MDH1, CA2, ATP1B1, FXYD2, GLS
KEGG_PARKINSONS_DISEASE	-0.457153	-2.17152	0	0.0005449	133	107	COX4I2,NDUFA4L2, GPR37, SEPT5, UBE2J1, SLC18A2, SLC6A3, UBE2L6, UBE2J2, CASP3, HTRA2, NDUFS5, ATP5G2, UBA7, APAF1, COX7A1, UBE2L3, SLC25A6, NDUFA7, VDAC2, UBE2G2, NDUFS4, ATP5D, NDUFB7, SDHA, VDAC1, NDUFB4, VDAC3, NDUFA8, NDUFB10, COX5B, NDUFA1, SNCAIP, ATP5O, COX6A2, UQCRHL, COX6B1, COX6C, COX7C, UQCRB, PINK1, NDUFC1, NDUFV3, UQCRH, COX7A2, UQCR11, ATP5H, COX7A2L, NDUFB8, NDUFA2, COX4I1, NDUFV2,…
PICCALUGA_ANGIOIMMUNOBLASTIC_LYMPHOMA_UP	0.503899	2.12526	0	0.000551	205	199	GJC1, PGF, CTHRC1, RGS5, CP, CCDC102B, COL8A2, GUCY1B3, LAMA4, GJA1, GPNMB, ARHGEF10, ACVRL1, MMP9, CDH5, CAV2, FAM198B, COL4A1, SERPINH1, COL4A2, TPM1, NNMT, C10orf10, ZNF226, PTRF, PMP22, GUCY1A3, APOC1, HSPG2, SPARC, LAMC1, SPRED1, CD93, OSMR, ADAMDEC1, ARHGAP29, SLC1A3, IGFBP7, VWF, FSTL1, FN1, KCNMA1, COL1A2, COL1A1, PCOLCE, MARCKS, ANTXR1, CD63, SPARCL1, ITPRIPL2, ENG, COL6A1, ABCC3, CYFIP1…
REACTOME_MITOCHONDRIAL_PROTEIN_IMPORT	-0.529872	-2.1668	0	0.0005542	58	47	TOMM20, TIMM9, TOMM7, HSCB, SLC25A6, GRPEL2, TAZ, TIMM10, PAM16, TOMM40, TIMM22, TOMM22, MTX1, GFER, TIMM8B, TIMM44, TIMM17B, VDAC1,SLC25A12, SAMM50, IDH3G, TIMM50, COX17, TIMM13, TOMM5, BCS1L, TIMM8A, PMPCB, LDHD, PMPCA, HSPD1, TIMM17A, SLC25A4,SLC25A13, GRPEL1, DNAJC19, ATP5G1, CYC1, CS, ACO2, CHCHD4, MTX2, COQ2, ATP5B, FXN, ATP5A1, HSPA9
KEGG_METABOLISM_OF_XENOBIOTICS_BY_CYTOCHROME_P450	-0.492456	-2.17157	0	0.0005585	70	60	GSTT2,ALDH3B1, CYP1B1,CYP2C18, CYP2C8, GSTP1, GSTM1, GSTA4, MGST2,UGT2B15, GSTM5, GSTM2,UGT1A10, GSTO2, MGST3, GSTT1, CYP2E1, CYP2S1, GSTA2, UGT1A4, UGT1A7, CYP3A5, UGT1A9, ADH6, GSTA1, DHDH,UGT2B10,ALDH1A3, GSTO1, UGT1A3, UGT1A8, UGT1A1, UGT2A1, AKR1C2, GSTM3, GSTM4, ADH1A, UGT2B4, CYP2B6, UGT2B7, CYP3A4, CYP1A1, EPHX1, ADH1B, CYP3A7, AKR1C4, AKR1C3, CYP1A2, MGST1, ADH1C,ALDH3A1,ALDH3B2, AKR1C1,…
SMID_BREAST_CANCER_RELAPSE_IN_BONE_DN	0.489244	2.12021	0	0.000576	315	267	CA9, KRT81, FABP7, KRT17, HLA-G, NMU, CDKN2A, NPTX2, NDUFA4L2, SOX11, AMD1, HPCAL1, PTP4A3, MALL, PGBD5, VEGFA, CP, PKP1, ACAN, EDN1, TMEM45A, FSCN1, HAPLN1, SLC16A3, KRT23, TTYH1, SLC43A3, PDK1, CXCL5, EN1, BMP1, COL4A2, MCM5, CXCR4, TP53, EPHX3, GPR161, PTPRF, NUP62, SMPDL3B, TAGLN2, CASK, SLC16A1, CD44, MFGE8, SOX9, CHST3, SLC7A5, DSC2, BGN, MMP14, FNDC4, ARL4C, TM4SF1, GALNT14, NFIX, SSRP1, L…
REACTOME_CHONDROITIN_SULFATE_BIOSYNTHESIS	0.751273	2.12361	0	0.0005771	21	18	CHST9, CSPG4, CHSY3,CSGALNACT1, CHSY1, CHPF, CHST3, BGN, CHST15, CHST11, CHST7, CHPF2, VCAN, CHST12,CSGALNACT2, BCAN, CHST13, DCN
VECCHI_GASTRIC_CANCER_ADVANCED_VS_EARLY_UP	0.515162	2.12174	0	0.0005851	175	164	CTHRC1, STC2, GXYLT2, IBSP, BICD1, IL1RAP, ZNF532, IGFBP3, COL11A1, TMEM45A, SFRP2, FAM19A5, PLA2G7, GPNMB, EDNRA, ALOX5, ESM1, ANGPT2, MMP11, COL5A2, CAV2, CMTM3, COL4A1, HEY1, FAP, COL8A1, NXN, EFEMP1, ZNF423, GUCY1A3, APOC1, SPARC, RAB31, AXL, BGN, ARL4C, TRPC1, CHST11, SLC1A3, SLC2A3, FSTL1, ITGBL1, FN1, COL1A2, LOX, TNFAIP6, ANTXR1, GNB4, PLOD2, INHBA, FNDC1, PDGFC, AUTS2, COL15A1, ALDH1L2, …
MUELLER_METHYLATED_IN_GLIOBLASTOMA	0.66179	2.11587	0	0.0006005	40	33	KRT81, KRT17, NPTX2, SFN, LSR, KRT19, RUNX3, LXN, SPINT1, TES, LAPTM5, MMP13, AREG, S100A4, COX7A1, GZMM,SERPINF1, CXCL2, CLDN4, IER3, LCN2, CDA, F11R, MAGEB2, TLR2, HSD17B6,SERPIND1, SSX1, STAG3, MAST3, S100P, TKTL1, FBXO2
WU_CELL_MIGRATION	0.509702	2.1106	0	0.0006108	184	178	GPR87, KRT17, NMU, FXYD3, AHNAK2, LAMA3, LOXL2, LGALS3, IGFBP3, SFN, PKP3, GJA1, ARHGDIB, VIM, BST2, ITGB4, KRT19, COL4A1, COL4A2, NNMT, EFEMP1, JAG1, TUBB6, TGFBI, EPAS1, COL6A2, RAB31, GALNT1, AXL, SOX9, ARL4C, TM4SF1, ARHGAP29, GALNT14, TSPAN13, CHST15, KRT7, DKK3, IGFBP7, ZNF22, CDH3, FN1, EFNB2, CD24, TRIM29, RNF128, NEDD9, GJB3, CD55, FYN, CST6, GNG11, PERP, KLF5, TPM2, PDGFC, SPINT1, CXADR…
PID_INTEGRIN1_PATHWAY	0.584654	2.11142	0	0.0006196	66	65	CSPG4, LAMA3, LAMB2, VEGFA, LAMB3,COL11A1, LAMA4, ITGA4, COL5A2, MDK, COL4A1, CD81, ITGB1, ITGA5, ITGA7, TGFBI, COL6A2, COL5A1, LAMC1, PLAUR, FN1, COL1A2, COL1A1, ITGA3, ITGA10, NID1, COL6A1, THBS2,COL18A1, LAMC2, ITGA1, LAMA5, COL3A1, COL7A1, FBN1, COL6A3, IGSF8, ITGA2, TGM2, ITGA6, ITGA8,COL11A2, ITGA9, CD14, ITGA11, TNC, JAM2, LAMA1, F13A1, THBS1, LAMA2, VTN, FGG, NPNT, FGB, ITGAV, FGA, SPP1, …
REACTOME_COLLAGEN_FORMATION	0.600999	2.11169	0	0.0006218	58	53	COL21A1, COL5A3, COL17A1, COL23A1, COL8A2, COL11A1, COL5A2, BMP1, COL4A1,SERPINH1, COL4A2, PLOD1, COL8A1, PLOD3, P4HB, COL6A2, COL5A1, COL1A2, COL1A1, PCOLCE, PLOD2, COL6A1, COL15A1, COL13A1, CRTAP, PPIB, COL3A1, ADAMTS2, COL7A1,ADAMTS14, COL6A3, COL25A1, COL10A1, COL9A1, COL11A2, COL16A1, COL27A1, COL12A1, TLL1, TLL2, COL14A1, ADAMTS3, PCOLCE2, COL22A1, COL9A3, COL9A2, COL4A5, COL19A1, COL24A1, …
ELVIDGE_HYPOXIA_DN	-0.441898	-2.16016	0	0.0006262	146	138	AMD1, CCND3, NETO2, MAZ, SLC24A3, GAS2L1, CCDC86, SLC35C1, GNA13, PIK3R3, NCLN, ARHGDIA, SRM, RAB35, SPDEF, C2CD2, HHEX, ARPC4, HSF1, LRRC59, SLCO3A1, ATP2A3, CDC20, FUS, MAPKAPK2, CORO1A, RRP15, KIAA0930, TAF9B, COPA, SLC29A1, HNRNPH1, URB2, PUS1, PNO1, TFAP2C, NIP7, DDX3X, RPP25, EIF5A, EXOSC4, SUMO3, BOP1, SOBP, CDV3, CORO1B, NUP98, CALM1, RET, TOMM22, BRMS1, SRSF1, ACOT7, SLC35B1, CEBPA,C14or…
ROY_WOUND_BLOOD_VESSEL_UP	0.609969	2.11143	0	0.0006285	50	49	PLXDC1, COL5A3, PCDH17, ANGPT2, FKBP1B, CDH5, COL5A2, BMP1, COL4A1, MSX1, CHN1, RAB31, TIMP1, PEA15, MCTP1, FBXL7, NRP1, NID2, SULF1, GNA12, TES, VCAN, COL3A1, KCNJ8, GALNT2, XAF1, S100A4, STOM, POSTN, SGCB,ANGPTL2, HEG1,SLCO2A1, ZWINT, STC1, THY1, ANXA6, GBP1, SEL1L3, LUM, CYR61, MMP1, KDM5D,DENND4B, HYAL1, ATG4A, SRSF11, PLAU, CYFIP2
REACTOME_ACTIVATED_AMPK_STIMULATES_FATTY_ACID_OXIDATION_IN_MUSCLE	-0.698719	-2.15712	0	0.0006288	19	17	STK11, PRKAA1, PRKAB2, CAB39L, PRKAG1, STRADA, CPT1B, ACACB, STRADB, CPT1A, PRKAB1,SLC25A20, PRKAG2, PRKAA2, CPT2, CAB39, ACSL1
CHICAS_RB1_TARGETS_GROWING	0.490957	2.1118	0	0.0006311	243	231	CDKN2A, ELOVL2, ANO1, LRRC17, PDGFD, CDCA7L, SLC1A4, IGFBP3, PYGL, NRXN3, CDCA7, MCM7, UHRF1, C1QTNF2, KIF4A, NRGN, CENPH, FAM198B, SLFN11, GINS2, LDB2, FAP, CAV1, PTRF,LINC00341, CENPK, LMNA, RNASEH2A, DDIT4, AXL, BGN, LRRC15, ARL4A, SSRP1, ZNF22, KIAA0101, KCNMA1, MCM2, FAM129A, PEAR1, PCOLCE, IFI16, CEP57, EZR, LXN, POLE2, DNAJC9, MARCKS, KIF20A, CCNB2, NRP1, GPM6B, ALDH1L2, RFC4, SULF1, CLU, …
KEGG_FOCAL_ADHESION	0.50693	2.11386	0	0.0006407	201	185	COL5A3, PGF, CCND1, PDGFD, LAMA3, LAMB2, CCND3, IBSP, FLNB, VEGFA, LAMB3, COL11A1, LAMA4, RASGRF1, SHC2, ITGB4, ITGA4, COL5A2, CAV2, THBS3, COL4A1, COL4A2, CAV1, ITGB1, FLT1, ITGA5, FLT4, ITGA7, COL6A2, SHC1, PTEN, COL5A1, LAMC1, CTNNB1, MAPK3, PDGFRB, ELK1, PAK3, VWF, VEGFC, FN1, PDGFA, CCND2, COL1A2, COL1A1, ITGA3, PPP1CC, ITGA10, KDR, FLNA, ACTN1, FYN, COL6A1, PDGFC, PIP5K1C, DIAPH1, MET, PIK3…
REACTOME_CLASS_A1_RHODOPSIN_LIKE_RECEPTORS	0.507019	2.10412	0	0.0006927	305	171	KISS1R, NMB, MCHR1, HTR6, NTSR1, NMU, S1PR5, ADRA1B, GPR4, OPN4, F2RL3, PTAFR, CCR10, EDN1, NMUR1, EDNRA, HRH1, CXCL5, CXCR4, CXCL16, P2RY1, TSHR, S1PR1, ANXA1, TBXA2R, BDKRB1, PTGIR, ADORA3, LPAR6, P2RY14, BDKRB2, EDNRB,ADORA2B, OPN3, GPR39, HTR1F, CX3CL1,CYSLTR1, CCL20, TACR2, APLNR, S1PR4, LPAR2,ADORA2A, P2RY6, SAA1, F2R, PTGFR, CCL5, CCL17, FPR3, MC1R, GPR132, CCL28, CCR7, CXCL3, GNRH1, PTGDR…
DING_LUNG_CANCER_EXPRESSION_BY_COPY_NUMBER	-0.449253	-2.14913	0	0.0006961	100	98	EIF3H, RFC4, PDCD6, GTF3A, RYK,PPP1R12A, ANKRD10, TRIM35, FXR1, CTTN, CBLL1, SIAH2, H2AFY, MYNN, TXNL1, THOC1, GEMIN2, ZNF302, PAN3, FIG4, DNAJC2, DBR1, WHSC1L1, FBXO33, ING1, SENP2, GABPA, ASH2L, GOLGA7, TBCA, PHC3, ATP11B, NIPBL, PPP4R2, PIK3CA, CEBPG, RAB20, NUP153, RAE1, CMAS, METTL4, RASA1, PAK2, MAP3K1, E2F3, RB1CC1,CDC42SE2,C19orf12, TERF1, NEK3, DCTD, THUMPD1, GATAD1, VPS41, CHD7, CDK8, F…
HSIAO_LIVER_SPECIFIC_GENES	-0.397701	-2.14519	0	0.000713	244	226	CP, PYGL, LSR, PRDX4, NNMT,SERPINA3, APOC1, ANG, PCSK6, SDS, SSRP1, RNASE4, CBS, PLOD2, RGL2, NCOR2, CASC3, SAA1, RARRES2, SAA4, FMO3, C3, TDO2, ATP13A3,SLC39A14,SERPING1, C4BPA, CYP2J2,SERPINE1, TF, AKR1D1, CYP2C18, HP, CFB, LCAT,SERPINF1, C2, IL13RA1, SUPT4H1, TAF6, APOC4, PROS1, IGFBP1, FURIN, FST, CYP2A6, TFPI, ASGR1, C1R, CRP, BZW1, ITIH3, HNMT, C1S, APOC2, MGST2, ITIH1, HPX, FCN2, CXCR2, F1…
TURASHVILI_BREAST_LOBULAR_CARCINOMA_VS_DUCTAL_NORMAL_UP	0.576414	2.09754	0	0.0008614	69	67	PLXDC1, CTHRC1,COL11A1, SFRP2, HSPA6, EDNRA, COL5A2, CXCR4, COL8A1, ASAP1, SPARC, COL5A1, PRC1, IFI44, MICAL2, BGN, LRRC15, FN1, COL1A2, COL1A1, LOX, GPX8, INHBA, ZEB1, FNDC1, TIE1, THBS2, SULF1, VCAN, GNA13, COL3A1, ADAM12, PRRX1, AEBP1, FBN1, POSTN, COL6A3, SULF2, COMP, LYZ, RGS1, UBTD2, MXRA5, C5AR1, WIPF1, TAGAP, WISP1, SMCHD1, THY1, SSR1, ASPN, FBXO28,COL12A1, CD69, PLXNC1, NAA15, ENPEP, DOC…
JISON_SICKLE_CELL_DISEASE_DN	0.506946	2.09583	0	0.0008937	181	170	FOXJ3, DGKA, TGFB1, PKP3, RPL4, EIF3D, RPL10A, BTF3, RPL23A, PTPRM, NPM1, RPS24, MCF2L, RPL6, RPL22, RPL14, OTUD3, IMPDH2, RPL11, ANP32B, TRAF5, NACA, TMED10, RPL5, RPL19, NAP1L1, RPL30, CSNK1E, FBL, RPL17, EIF3E, RASGRP2, CXCR4, ARHGEF7, PABPC4, EIF3H, NONO, RPL37, RPL41, EIF4B, EEF1G, ITPR3, RPL13, RPL24, EEF2, RPLP0, RPS20, RPS13, RPL7, DYRK2, RUNX3, TSC22D3, RPS6, EIF3F, FYN, RPS27A, ERCC5, E…
LU_TUMOR_VASCULATURE_UP	0.656679	2.09543	0	0.0008963	29	29	PLXDC1, COL5A3, FJX1, HSPA6, MMP9, CHN1, FOXF2, RPS11, LCP2, PAMR1, TNFAIP6, MUC1, FZD10, ISG15, VCAN, HOPX, ADAP2, TWIST1, ADAM12, POSTN, CMTM8, MXRA5, STC1, PMAIP1, EGFL6, SCIN, SPP1, WDR77,TNFRSF21
KEGG_GLYCOSAMINOGLYCAN_BIOSYNTHESIS_CHONDROITIN_SULFATE	0.698888	2.09278	0	0.000913	22	22	CHST14, CHSY3,CSGALNACT1, CHSY1, CHPF, XYLT2, B3GAT3, B3GALT6, CHST3, CHST15, CHST11, CHST7, CHPF2, CHST12, XYLT1,CSGALNACT2, B4GALT7, DSE, B3GAT2, CHST13, UST, B3GAT1
REACTOME_METABOLISM_OF_RNA	0.483744	2.09251	0	0.0009153	330	250	RPL4, RPL10A, RPL10, RPS8, RPL23A, RPL15, RPS24, RPL38, RPL12, EXOSC2, RPL6, RPL22, RPL14, RPL11, RPL7A, RPL5, RPL19, RPL35A, RPS25, RPL32, RPL30, RPL3, RPS19, RPL17, RPL18, RPL27A, EXOSC5, GEMIN4, RPS4X, RPS3, PABPC1, RPL37, NUP62, RPL31, RPL41, RPS2, RPL28, EIF4B, RPL37A, RPS23, RPL18A, RPS18, RPL13, RPL29, RPL23, RPL36, RPL34, GEMIN7, RPS11, RPLP2, RPL24, EXOSC9, SMG8, FAU, RPL26, NUP54, RPLP0…
PID_FOXM1_PATHWAY	0.634758	2.0903	0	0.0009174	40	38	TGFA,CDKN2A, CCND1, LAMA4, XRCC1, CDK2, CKS1B, CCNB2, RB1, AURKB, CCNB1, CENPF, FOXM1, BRCA2, CCNA2, CENPB, PLK1, BIRC5, SP1, MMP2, NEK2, MYC, ETV5, CENPA, CDK4,MAP2K1, CHEK2,CREBBP, SKP2, EP300, FOS,NFATC3, CDK1, CCNE1, GSK3A,CDC25B, ESR1, GAS1
CHEMNITZ_RESPONSE_TO_PROSTAGLANDIN_E2_UP	0.511624	2.08732	0	0.000947	146	136	GJC1, PVT1, PTP4A3, OLFML2A, TGFB1I1, SLC7A1, KSR1, AFAP1L1, NPM1, DYSF, UHRF1, GRAMD1A, SNRPA, SCNM1, PRAF2, RAPGEF4, FEZ1, FLT1, CHAF1A, CDC45, SLC16A1, LRRC8C,RNASEH2A, ARAP3, PRC1, RFTN1, ZAK, TRIM28, FAM64A, ASF1B, CDC6, UBE2C,KIAA0101, PEA15, PWWP2A, RPL8, ADAM19, NCAPG, WDR76, KIF20A, CCNB2, MKI67, PTTG1,C19orf48, RPS9, BRIP1, TPX2, ATAD2, GTSE1, TTK, CCNB1, CENPF, PCGF1, DLGAP5, FANCL, RR…
CROMER_METASTASIS_DN	0.554631	2.08498	0	0.0009622	81	78	FXYD3, COL17A1, DDB2, MALL, FLNB, PKP1, SFN, DUSP7, ITGB4, PFKP, CAV2, PA2G4, BMP1, SH3GL1, CAV1, DTX2, PLEC, EPAS1, LMNA, RAB31, MBD2, TPBG, TNFRSF10B, NCK1, TRIM29, ITGA3, GJB3, ALDOA, TTLL12, KLF5, CELSR1, TNNT3, TRIM16, PHLDA2, TICAM1, ISG20L2, IGSF3, S100A11, SVIL, CUL1, CARD10, NOP16, CEBPZ, UBE2M, C11orf80, NOP2, TMEM183A, GSTP1, PPP4C, KLK10, PSMD8, MINK1, SDC4, LAD1, JUP, EVPL, ATP5D, PR…
KIM_GLIS2_TARGETS_UP	0.549402	2.0816	0	0.0010039	84	82	HLA-G, ANGPTL4, EFEMP2, VIM, CASP4, CMTM3, COL4A1, LSP1, BBC3, TGFBI, SPARC, OSMR, MMP14, PYCARD, COL1A2, COL1A1, IFITM3, NID1, SPARCL1, CX3CL1, COL15A1, ISG15, FCER1G, COL18A1, MGP, COL3A1, PSMB8, CCL5, ADAMTS2, LTBP2, S100A6, ADAM8, FBN1, S100A4, C3, POSTN, FCGR2A,SERPINE1, LILRB3, PSMB9, MFAP2,TNFSF13B, PDGFRL, IGFBP2, CDCA3, CFH, TGFBR2, TSC22D1, SOCS3,HLA-DQB1, HLA-DRA, ICAM1, BOK, AIF1, CXC…
REACTOME_IRON_UPTAKE_AND_TRANSPORT	-0.542065	-2.12545	0	0.0010277	36	36	CP, TCIRG1, HEPH, ABCG2, CYBRD1, TF, FTH1, TFRC, HMOX1, SLC46A1, MCOLN1, STEAP3,ATP6V0A2, FTL,ATP6V1G1,ATP6V1G2,ATP6V1B2,ATP6V0E1, SLC40A1, HMOX2,ATP6V1E2, ATP6V0C,ATP6V1G3,ATP6V1B1,ATP6V0D2,ATP6V0A4, ATP6V1F,ATP6V1C1, FLVCR1,ATP6V1C2, ATP6V0B,ATP6V1E1, ATP6V1D,ATP6V0D1, ATP6V1H, ATP6V1A
BOYAULT_LIVER_CANCER_SUBCLASS_G123_DN	-0.52365	-2.12952	0	0.0010394	51	47	DMD, F8, FYN, FAS, ECM2, PSD3, SLC28A1, NR1I2, ITIH4, EXPH5, CFI, PRODH2, SLC16A2, ACSM5, HPD, MAT1A, SEC14L2, RCL1, SLC4A4, FGA, PROZ, SLC27A5, MLYCD, MSRA, GCDH, SLC6A12, PCK2, HYAL1, GRHPR, ETNK2, ACAA1, MTHFD1, RGN, ECHDC2, DCXR, ACAA2, ASPA, EPHX2, SLC25A15, HADH, ALAS1, ST3GAL6, ETFDH,GABARAPL1, CBR4, ACADL, GOT2
KEGG_NOTCH_SIGNALING_PATHWAY	0.617824	2.08051	0	0.0010446	47	44	NOTCH3, DLL4, JAG2, NCSTN, DTX2,NOTCH4, DVL2, JAG1, MAML3, SNW1, MFNG,ADAM17, HES5, RBPJ, CIR1,NOTCH1, NCOR2, CTBP2, APH1A, DTX3L, DLL1, DTX4, MAML1, NUMBL,NOTCH2, DTX3, MAML2, HDAC2,CREBBP, CTBP1, DVL1, RFNG, HDAC1, EP300, LFNG, PSEN1, KAT2A, DVL3,PSENEN, HES1, NUMB, DTX1, PSEN2, KAT2B
LUCAS_HNF4A_TARGETS_UP	-0.502459	-2.12558	0	0.0010486	58	55	COL21A1, PRKCSH, LASP1, DSC2, PRPH, NID1, DDAH2, CAMKK2, IL13RA1, MPP1, PKIG, MGST2, BIRC2, SDC4, CFLAR, AKAP1, DHRS1, PKP2, OSBPL3, CALML4, ACADVL, SMAGP, ABCB4, HNF4A, TRAF4, ATXN7L1, WT1, VIL1, DERA, CIDEB, IL18R1, DNAJC22, TECR, RBKS, EBP, ACOT13, ATP7B, ERBB3, MTM1, ACY1, KIFAP3, ACOX1, COBL, KIF13B, TACC2, SLC35D1,SLC25A20,SELENBP1, ETFDH, ALDH5A1,C1orf115, EFHD1, SLCO4C1, ABCB1, MAN1A1
REACTOME_PHASE_II_CONJUGATION	-0.486684	-2.12231	0	0.0010513	70	60	NNMT, GGT7, GGT5, PAPSS1, CNDP2,SULT1A3, GSTP1, GSTM1, ACSM1, COMT, MAT2A, GSTA4, MGST2, GSTM5,SULT2A1, GGT1,SULT4A1, UGDH, GSTO2, MGST3, GSTA2, UGT1A4, UGT1A7, UGP2,SULT1A1, UGT1A9, MAT1A, GSTA1,UGT2B10, ACSM2B, GSTO1, UGT1A3,SULT2B1, UGT1A8, UGT1A1, UGT2A1, GLYAT,SULT1C4, NAT1, GSTM4, UGT2B4, UGT2B7, GSS, OPLAH, MTR, CYP1A2, MGST1, AHCY, GCLC, UGT1A6, MAT2B, GGCT, GCLM,SULT1A2,SULT1C2,SLC35D1, …
HOSHIDA_LIVER_CANCER_SUBCLASS_S1	0.489786	2.07766	0	0.0011103	237	231	CD47, DGKA, SLC2A1, QSOX1, FHL3, COL11A1, PLP2, ARHGDIB, GPNMB, CELF2, GNAI2, RIT1, TRAF5, PAM, COL5A2, LGALS9, COL4A1, TCF4, COL4A2, ANXA4, CHN1, CXCR4, LSP1, EFEMP1, LGALS1,LGALS3BP, PRKD2, CRABP2, ANXA1, GUCY1A3, COL6A2, ITPR3, RALGDS, PLAUR, RAB31, PKMYT1, PGK1, SLC7A5, LMO4,KIAA0101, RNASE1, PEA15, RCC1, CRIP2, PROCR, CCND2, COL1A2, IFI16, RSU1, PLD3, TIMP2, DPYSL2, RIN2, FLNA, ITGB2, LOX, P…
WEINMANN_ADAPTATION_TO_HYPOXIA_DN	0.625517	2.07534	0	0.0011488	41	38	NMU, STC2, GPR37, IGFBP3,SLC16A3, DMD, TPM1, NNMT, EPAS1, PLAUR, TPBG, IGFBP7, VEGFC, CD55, MARCKS,COL15A1, COL3A1, ID3, CRLF1, NT5E, UGCG, IER3, TFPI2, ANP32A, IL6, KCNK1,PLA2G4A, SDC4, MMP1, MEST, HSPA1B, HSPA2, IL18R1, LPL, CADM1,ALDH3A1, NRCAM, SOD2
LINDGREN_BLADDER_CANCER_CLUSTER_2B	0.471963	2.07292	0	0.0011725	392	375	CRIP1, LAMB2, RGS5, LAMA4, COPZ2, HEYL, NEURL1B, EDNRA, SLC43A3, EBF1, GRK5, CELF2, MCAM, JAK3, PECAM1, ITGA4, COL5A2, SLFN11, CHSY1, TCF4, TPM1, ENTPD1, PXDN, CXCR4, CAV1, NNMT, LBH, ISG20, SERPINA3, EFEMP1, LGALS1, PTRF, GSN, CNRIP1, PMP22, JAM3, RGS10, GUCY1A3, PRKCH, COL6A2, SPARC, UBE2J1, LRRC8C, RELL1, PLAUR, SPRY1, LCP2, MICAL2, PDGFRB, KIAA0922, PPP1R18, NRP2, ZAK, ARL4C, FOXF1, SH2B3, AR…
KEGG_NEUROACTIVE_LIGAND_RECEPTOR_INTERACTION	0.509871	2.07377	0	0.0011735	272	161	KISS1R, GABRD, MCHR1, HTR6, CRHR1, GRIK3, NTSR1, GRM8, S1PR5, ADRA1B, F2RL3, PTAFR, GRID1, CHRNA1, CALCRL, NMUR1, EDNRA, HRH1, P2RY8, GABRG1, GRIN2D, CHRNB1, CHRNA5, P2RY1, TSHR, S1PR1, TBXA2R, GRIA2, BDKRB1, PTGIR, ADORA3, LPAR6, GRIN2C, P2RY14, BDKRB2, EDNRB,ADORA2B, GABRP, HTR1F, NR3C1, GRIA4,CYSLTR1, TACR2, CALCR, APLNR, S1PR4, LPAR2,ADORA2A, TSPO, P2RY6, CHRNA6, F2R, PTGFR, FPR3, GRIA1, MC1R…
HSIAO_HOUSEKEEPING_GENES	0.46496	2.07071	0	0.0012338	389	383	LGALS3, CCNI, RPL4, RPL10A, RPS8, PLP2, OS9, ARHGDIB, NCSTN, NPM1, RPL38, RPL12, RPL6, VIM, RPL14, RPL11, RPL7A, ANP32B, NACA, TMED10, ANXA2, RPL36AL, RPL19, PDLIM1, RPL35A, RPS25, RPL32, NAP1L1, APEX1, RPL3, HNRNPA1, FBL, RPS19, RPL17, RPL18, EIF3E, NDRG1, RPL27A, ARHGAP1, RPS3, GAPDH, CD81, SSR2, PABPC1, NONO, ITGB1, ISG20, UBC, GNB1,SERPINA3, LGALS1, MAZ, RPL31, CYB5R3, RPL41, RPS2, TAGLN2, RP…
PECE_MAMMARY_STEM_CELL_UP	0.515001	2.06849	0	0.0012426	146	133	KRT17, GAS5, TUBB4B, PKP1, LAMB3, RPL10A, RPL23A, RPL15, DUSP7, IL4R, RPL22, GLTSCR2, RPL7A, NACA, RPL36AL, RPL35A, RPS25, RPS19, RPL27A, RPS3, GAPDH,SERPINA3, RPL41, RPS2, RPL28, JAG1, MANBA, RPL18A, RPS18, RPL13, RPLP2, RPL24, TMSB10, SNHG6, FAU, RPS20, RPS13, RPL8, RPS14, SEC61G, RPS16, RPS12, UBA52, PERP, RPL13A, RPS10, RPLP1, DDR1, PTMA, CLU, MGP, RPSA, EEF1D, STK35, TUBB3, KRT14, NFIB, RALA…
WU_APOPTOSIS_BY_CDKN1A_VIA_TP53	0.588865	2.06883	0	0.0012567	55	53	P4HA1, VEGFA, NPM1, MCM7, ANLN, TUBA1A, PRC1, TYMS, FANCI, UBE2C, MCM2, NCAPG, MKI67, EXO1, AURKB, MCM6, TPX2, ATAD2, TTK, ZNF84, CCNB1, DLGAP5, CEP55, TUBB3, HMGB2, TOP2A, ASPM, PBK, BUB1, CDKN1A, WDHD1, KNTC1, RRM1, MCM3, MIS18BP1, CHEK1, AURKA, MCM4, UBE2T, RACGAP1, ZBTB5, BIRC2, CDK1, CYR61, SMC2, TUBB4A, CDC25B, NCAPD3, FAT2, TRIM44,HNRNPA2B1, PARP2, TCN2
SMIRNOV_RESPONSE_TO_IR_6HR_DN	0.520619	2.06652	0	0.0012649	114	110	CD300A, EGLN3, HK2, ZNF395, P4HA1, TMEM45A, SLC16A3, INSIG2, CLEC2D, PDK1, TRAF5, ITGA4, ENTPD1, HEY1, GEMIN4, STS, KDM3A, LCP2, RNASET2, SLC2A3, UBE2C, SIPA1, CD55, KIF20A, CCNG2, GFOD1, VGLL4, LPCAT4, TPX2, DEPDC1, CCNB1, CENPF, DLGAP5, ASPM, ZBTB32, PLK1, SUN2, CACNA1A, IL16, BNIP3, BUB1, EGLN1, NEK2,ARHGAP11A, HHEX, MNT, MYC, RAB33A, KLF6, CENPA, RNASE6, RGS1, ACAP1, KLF2, ATP2A3, CDC20, MAFF…
AMIT_EGF_RESPONSE_480_HELA	0.502599	2.06242	0	0.0013344	164	157	KRT17, CCND1, MBD1, HPCAL1, MALL, TBC1D2, CCND3, TUBB4B, SFN, SEPT9, DUSP7, CAMSAP1, SYDE1, SORBS3, COL4A1, SERPINH1, COL4A2, PMEPA1, ENC1, ISG20, PTPRF, ITGA5, GPRC5A, PLEC, RELA,LINC00094, ITPR3, AGRN, MTA1, CTNNB1, PLAUR, TPBG, CD44, MICAL2, SMTN, OSMR, MAD1L1, TM4SF1, MYO9B, CHST11, INPP1, DUSP4, NEDD9, ACTN1, RRP1, GABPB1, PDLIM7, DAPK3, PPDPF, LPCAT4, ARHGEF2, DIAPH1, EGFR, TSPAN14, VASP, D…
ZHAN_MULTIPLE_MYELOMA_PR_UP	0.604154	2.05882	0	0.0013873	45	42	TSR1, PRC1, TYMS, FANCI, UBE2C,KIAA0101, MCM10, CCNB2, SKA1, RFC4, TPX2, TTK, CCNB1, FOXM1, DLGAP5, RRM2, TOP2A, ASPM, TRIP13, BIRC5, NUF2, DSCC1, EZH2, NEK2, E2F8, NUSAP1, PRR11, SPC24, BUB1B, SPC25, KIF14, MAGEA6, CCDC34, AURKA, UBE2T, RACGAP1, CDK1, CENPL, SLC19A1, KPNA2, ZWILCH, DEPDC1B
FUJII_YBX1_TARGETS_UP	0.623244	2.05954	0	0.0014024	43	38	GPR87, SYTL1, ULK1, SLC16A3, TRIB2, PAM, LGALS9, CLIC3, POF1B, MBD2, NR5A2, TRIM22, MUC1, DIAPH2, ACTA2, SULF1, FAS, CCL5, S100A6, EDIL3, CDKN1A, NLRC5, CFB, MX2, KLF11, GIMAP2,PRICKLE1, MVP, SERHL2, PDK4, CAPG, CPNE4,CDC42SE2, MAOB, SEMA6D, RARRES3, WARS, CEACAM1
HUPER_BREAST_BASAL_VS_LUMINAL_DN	0.575705	2.05601	0	0.0014187	59	58	KRT81, HLA-G, KRT15, MALL, KRT86, IGFBP3, INHBB, VWA1, ENO2, KRT19, EFEMP1, GPRC5A,ADAMTS5, TM4SF1, PROM1, GABRP, CST6, CNN3, WFDC2, CLDN7, PSMB8, HLA-F,PLA2G16, MLPH, ALCAM, HLA-B, LOXL1, TPM4, PSMB9, DKK1, KRT8, KRT18, HLA-C, UGCG, CLDN4, BIK, NR2F2, IGFBP4, LCN2, ANXA11, ANPEP, FUCA1, BACE2, IL32, CYR61, KLK6, FUT3,TNFAIP2, SCCPDH, SEMA3B, HMGA1, METRN, TBL1X, MYO5C, GAD1, DDAH1, IDH2, MYO6
REACTOME_SULFUR_AMINO_ACID_METABOLISM	-0.613857	-2.0997	0	0.0014607	24	24	CBS, SQRDL, MTAP, CNDP2, MAT2A, ETHE1, CSAD, MRI1, MAT1A,SLC25A10, ENOPH1, MTR, BHMT, CDO1, AHCY, GCLC, MAT2B, GCLM, CTH, TST, APIP, SUOX, ADI1, GOT1
REACTOME_PEPTIDE_LIGAND_BINDING_RECEPTORS	0.527186	2.04953	0	0.001615	188	101	KISS1R, NMB, MCHR1, NTSR1, NMU, F2RL3, CCR10, EDN1, NMUR1, EDNRA, CXCL5, CXCR4,CXCL16, ANXA1,BDKRB1,BDKRB2, EDNRB,CX3CL1, CCL20, TACR2, APLNR, SAA1, F2R, CCL5, CCL17, FPR3, MC1R, CCL28, CCR7, CXCL3, C3, EDN2, OXTR, CCL22, CXCL6, NPFF, F2RL2, FPR1, C5AR1, C3AR1, CXCL9, SST, RXFP1, APP, CCR5, CXCL1, CXCR3, CXCR6, CCL4, CXCL2, XCR1, PMCH,CXCL11,CXCL13, QRFPR,CX3CR1, CCL19, NTS, CCL3, PPBP, XCL2, FPR…
KEGG_ALANINE_ASPARTATE_AND_GLUTAMATE_METABOLISM	-0.562899	-2.09102	0	0.0016299	32	31	IL4I1, ADSL, CAD, GFPT2, GLS2, DDO, ASNS, ADSSL1, ADSS, CPS1, GFPT1, PPAT, AGXT2, GLUL, ACY3, AGXT, GPT, GAD1, ASL, ABAT, ASS1, GPT2, GLUD2, GLUD1, NIT2, ASPA,ALDH4A1,ALDH5A1, GOT1, GOT2, GLS
KERLEY_RESPONSE_TO_CISPLATIN_UP	0.608906	2.04975	0	0.001632	44	42	DDB2,TNFRSF10C, DGKA, INPP5D, FDXR, PHLDA3, PLK2, ANXA4, CAV1, ANXA1, LMNA, DDIT4, PLK3, PPM1D, TRIM22, PROCR, NEFL, ACTA2, RPS27L, FAS, SESN1, CDKN1A, PDE4A, EPS8L2, FOSL1, SERPINE1, FADS3, ZMAT3, GLS2, ISYNA1, IER3, HSD17B3, STK17A, DRAM1, ALDH1A3, CXCL14, PLAT, TP53TG1, ANK1, GDF15, GADD45A, BTG2
CLASPER_LYMPHATIC_VESSELS_DURING_METASTASIS_UP	0.749216	2.04698	0.0015649	0.0016655	20	18	CD200, EDN1, UNC5B,ANGPT2, ADM, TGFB2, TGFB3, SPRY1, ENG, CXADR, PDGFB, ESAM, TNC, HOXB5, F11R, PIM1, THBS1, LEPR
ONDER_CDH1_TARGETS_3_DN	0.598101	2.04569	0	0.0016706	59	44	PTHLH, TGFA, KRT15, ANO1, HS3ST2, EDN1, C10orf10, GPRC5A, ARHGAP25, SOX9, DSC2, ARL4C, SCEL, PI3, IL1R2, CXCL3, SERPINB1, C1orf116, KRT8, CYB5R2, MFAP5, CXCL1, KRT13, CXCL2, FST, VGLL1, LCN2, NAV3, KLK10, EHF, KLK7, HBEGF, PTGS2, CSF3, TP63, IL1B, DUSP6, MYO5C, EPN3, ATP12A,ST6GALNAC5, SPAG1, P2RY2, CWH43
KEEN_RESPONSE_TO_ROSIGLITAZONE_UP	-0.545022	-2.08258	0	0.001706	38	37	VEGFB, FZD4, UBE2M, SORBS1, FAM69B, ZNF740, PEX6, ROMO1, PNPLA2, TXNIP, CIB2, CYP4B1, CES1, PLIN4,NDUFB10, TYSND1, SAMM50, COX17, MRPL4, AKT2, CMBL, DGAT1, NDUFS3, ACAA1, NDUFB6, HSPD1, ACOT13, ALS2, UQCRQ, DLST, IARS2, FABP3, AQP7, PPARA, SDHB, ATP5G3,SLC25A5
KEGG_RETINOL_METABOLISM	-0.499735	-2.08357	0	0.00171	64	49	ALDH1A2, DHRS9,CYP2C18, CYP2C8, CYP2A6,UGT2B15, LRAT,UGT1A10, RDH5,CYP26B1, UGT1A4, UGT1A7, CYP3A5, UGT1A9, ADH6,CYP4A11,UGT2B10, RDH12,CYP4A22, UGT1A3, UGT1A8, UGT1A1, UGT2A1, ADH1A, RDH16, UGT2B4, CYP2B6, UGT2B7, RETSAT, CYP3A4,DHRS4L2, CYP1A1, DHRS4, DGAT1, ADH1B, DHRS3, CYP3A7, CYP1A2, ADH1C, ADH4, UGT2A3, UGT1A6, ADH5, CYP2C9, DGAT2, PNPLA4, RDH11, RDH10,ALDH1A1
MORI_PRE_BI_LYMPHOCYTE_UP	0.543515	2.03985	0	0.0017194	80	76	CRIP1, LIG1, TUBB4B, DTL, CDCA7, MCM7, KIF4A, PRDX4, GAPDH, RAD51, TUBA1A, PRC1, UBE2C, SSBP4, MCM2, HMGN2, TUBB, MELK, CKS1B, CCNB2, ENG, MKI67, FCER1G, MCM6, TTK, CCL5, EMP1, MIF, RRM2, GSTT2, TOP2A, LEF1, CDCA5, NCAPH, CDKN1A, MTHFD2, E2F8, LMNB1, ACTN4, KANK3, H2AFX, RRM1, CDC20, ANP32E, SMC4, CDCA3, GZMA, RASA4, EMB,SLC29A1, MPEG1, NUCKS1, HMMR, AURKA,RACGAP1, RBBP4, SQLE, RAN,SMARCC1, MGST2…
PASINI_SUZ12_TARGETS_DN	0.462615	2.03603	0	0.0017564	315	303	SOX11, IRS2, IER5, CD276, LOXL2, TGFB1I1, IGFBP3, SFN, STMN2, RAP2B, COL11A1, CDKN2B, VIM, TMEM43, TMEM47, ANXA2, CAV2, EFNA5, ETS1, PLK2, BMP1, KRT19, CMTM3, SERPINH1, TPM1, TGFB2, PXDN, CAV1, DUSP14, ITGB1, SDC1, EFEMP1, LGALS1, PTRF, GSN, GPRC5A, KCTD10, PMP22, TAGLN2, JAG1, LHFP, PTPN12, CTXN1, ANXA1, TUBA1A, TUBB6, UBE2J1, COL5A1, ARAP3, GBP2, AXL, PRSS23, MMP14, PPP1R18, ARL4C, GAP43, PROM1…
MOLENAAR_TARGETS_OF_CCND1_AND_CDK4_DN	0.573308	2.03552	0	0.0017713	58	52	CDCA7L, DTL, CDCA7, MCM7, KIF4A, CENPH, MESDC2, CDC45, CENPK, PSMC3IP, RFC5, CDKN2C, CDC6,KIAA0101, MELK, KIF20B, KIF20A, TPX2, PDLIM3, CENPF, CEP55, TRIP13, ENDOD1, CDCA8, E2F7, HJURP, NCAPH, GPC6, MYBL1, KIF2C, SPC25, FAM83D, FAM204A, MNS1, CDCA2, TMSB15A, KIF11, MED30, AURKA, GAS2L3, ZNF367, ERI1, MTMR1, DONSON, POLD3, ELAVL1, JKAMP, MORC4, TOR3A,KIAA1524, CENPN, AQP3
INGRAM_SHH_TARGETS_DN	0.572584	2.03398	0	0.001779	64	56	LRRC17, SFRP2,ANGPTL4, DIRAS2, CALCRL, CAV2, PRDX4, SDC1, TUBA1A, TGFBI, SPARC, EVL, PPM1D, DAXX, SLC1A3, TPPP3, COL1A1, CDC37, PLK4, GPM6B, CLU, GNA12, VCAN, GAS6, CRLF1, ENDOD1, BRPF1, TYK2, PGM5, SND1, C3, SLPI, MAGED2,SERTAD1, MEGF10, EREG,FAM102B, EMB, AOC3, PTX3, PTN, MRPL54, IL1RN,C2orf40, HGF, CCNE1, RET, POU3F1, WNT5B, ITGB7, DRAM1,C2orf68, MME, GLRX, SFRP1, BAMBI
MIKKELSEN_ES_ICP_WITH_H3K4ME3_AND_H3K27ME3	0.516198	2.03457	0	0.0017858	137	102	LECT1, COX4I2, MCHR1, LEFTY1, NOL3, IDO1, LAMA4, FXYD5, CLEC14A, GPNMB, MST1R, ZNF608, TGFB3, CRABP2, GUCY1A3, SEZ6L2, CNTNAP1, ALOX15B, CD44, CHST3, CDKN2C, PAMR1, COL1A2, KCNJ2, LOXL3, GGT7, ABCC3, LYL1, PRSS36, GPAT2, PTGFR, SLFN5, RHOJ, PDE8B, TEKT2, EDN2, DKK1, ADARB2, ISLR, HSPA12B, CORO1A, GPR84, ESRP1, KCNN3, ISLR2, TSSK3, KCNJ5, KCND2, TLR5, PTGS1, TSPAN11, HOXB13, LTA, OSM, TFPI2, PAX5,…
KEGG_TRYPTOPHAN_METABOLISM	-0.546672	-2.07778	0	0.0018218	40	34	IDO1, IL4I1, TDO2, CYP1B1, WARS2, INMT, HAAO, KMO, DDC, MAOB, KYNU, ACMSD, CYP1A1, WARS,ALDH1B1, GCDH, CYP1A2, AOX1, AFMID, ALDH2, OGDH,ALDH7A1, ACAT2, HADHA, ECHS1, AADAT, EHHADH,ALDH3A2, OGDHL, HADH,ALDH9A1, CAT, ACAT1, MAOA
KEGG_BETA_ALANINE_METABOLISM	-0.622145	-2.07494	0	0.001829	22	21	SRM, AOC3, AOC2, DPYS, SMS, UPB1, CNDP1, MLYCD, GAD1,ALDH1B1, ALDH2, ABAT,ALDH7A1, DPYD, HIBCH, HADHA, ECHS1, EHHADH,ALDH3A2, ACADM,ALDH9A1
YANG_MUC2_TARGETS_DUODENUM_3MO_DN	-0.647028	-2.06952	0	0.0018554	23	19	GSTM1, GSTA4, GSTM5, GSTT1,CYP4A11,SULT2B1, GSTM4, CYP2B6, CYP1A1, NQO1, ME1, GSTK1, FMO5, NFE2L2, GLRX, POR, EPHX2, CAT, CYP4V2
REACTOME_MITOCHONDRIAL_TRNA_AMINOACYLATION	-0.619023	-2.07049	0	0.0018745	21	21	RARS2, QARS, KARS,WARS2,PARS2,AARS2,FARS2,EARS2,YARS2,CARS2,VARS2,MARS2,SARS2,TARS2, GARS,HARS2,IARS2,LARS2, PPA2,DARS2,NARS2
CHIANG_LIVER_CANCER_SUBCLASS_PROLIFERATION_UP	0.489928	2.02765	0	0.0019536	178	165	HK2, CDCA7L, PTP4A3, ZNF532, H19, LDLRAD3, PLP2, SLC16A3, MARCH3, DTL, CDCA7, MMP9, ANLN, KIF4A, NT5DC2, CMTM3, NCK2, FAM118A, PRC1, SOX9, ELF4, CHST11, FANCI, PAG1, CDC6, UBE2C, CD24, MCM2, TMED3,MARCKSL1, NCAPG, MARCKS, KIF20A, CCNB2, GALNT7, NDC80, SKA1, MKI67, PTTG1, RFC4, DDR1, CTBP2,SLC39A10, AURKB, TPX2, PDE9A, TTK, DEPDC1, CCNB1, KIF18B, SLC38A1, CENPF, FOXM1, DLGAP5, CEP55, CCNA2, VEGFB,…
SCHMIDT_POR_TARGETS_IN_LIMB_BUD_UP	-0.594073	-2.0644	0	0.001961	26	24	ACLY, FDPS, NSDHL, SQLE, LDLR, MVD, ELOVL6, STARD4, ZMAT4, SREBF2, INSIG1, FGL1, MSMO1, AASDH, ACAT2, DHCR7, LSS, MVK, HMGCS1, FDFT1, FOXC1, IDI1,CYP51A1, TM7SF2
CHARAFE_BREAST_CANCER_LUMINAL_VS_MESENCHYMAL_DN	0.452603	2.02811	0	0.0019722	460	440	FAM57A, GPR176, AHNAK2, GXYLT2, LOXL2, TGFB1I1, PRKCDBP, TGFB1, PYGL, MARVELD1, LAYN, PRR16, FSCN1, FXYD5, EFEMP2, CPNE2, GJA1, PLP2, PTPRM, SYDE1, VIM, HRH1, GRK5, RNF145, ANLN, DMD, MID1, MCAM, PFKP, KDELC2, ANXA2, CAV2, IKBIP, ETS1, ANXA2P2, CMTM3, TOX2, COL4A1, CHSY1, COL4A2, TPM1, TGFB2, PXDN, FOXF2, EMILIN2, PABPC4, ASAP1, CAV1, GPR161, NNMT, NONO, LBH, MAP4K4, PTRF, CNRIP1, PMP22, FLI1, JA…
MODY_HIPPOCAMPUS_PRENATAL	0.609332	2.0287	0	0.0019912	42	41	RPS8, BTF3, RPL12, RPL5, RPL19, TP53, RPL37, EEF1G, RPS18, RPL13, UBE2C,HNRNPA0, CCND2, RPL8, RBPJ, CCNB2, CCNG2, RPL13A, TOP2A, EFTUD2, RPL9, EEF1A1,CDK2AP1, CDK4, H2AFX, POLR1C, EIF4A3, PCNA, MYT1, SNRPB2, EIF2S2, WBP1, DDX19A, H1F0, NFYB, CKS2, SRSF6, SFPQ, H2AFV,GADD45G, LSM4
MORI_IMMATURE_B_LYMPHOCYTE_DN	0.532978	2.0259	0	0.0019962	90	89	CCND3, LIG1, TUBB4B, DTL, CDCA7, MCM7, U2AF1, PRDX4, RAD51, LGALS1, GSN, CDC45, TUBA1A,SLC16A1, PRC1, CDKN2C, UBE2C, MCM10, MCM2, HMGN2, TUBB, MELK, CKS1B, CCNB2, MKI67, MCM6, TTK, CCNB1, CBX1, DLGAP5, CCNA2, RRM2, HMGB2, TOP2A, PRIM1, CDCA5, NCAPH, IQGAP3, EZH2, NEK2, CDKN1A, MTHFD2, E2F8, LMNB1, ACTN4, NUSAP1, CENPA, RAD54L, H2AFX, RRM1, CDC20, ANP32E, CDKN3, MCM3, SMC4, CALM2, CDCA3, UCK2, PCN…
SASAI_RESISTANCE_TO_NEOPLASTIC_TRANSFROMATION	0.580933	2.02423	0	0.0020292	50	48	COL5A3, LAMB2, TGFB1I1, QSOX1, EDN1, CACNB3, MMP11, COL5A2, VLDLR, CAV1, TGFB3, RGS10, WISP2, PDGFRB, BGN, CDKN2C, FSTL1, COL1A1, PCOLCE, GJB3, PLOD2, DDR1, ID3, LTBP2, TAGLN, FBN1, CSRP1, TNFRSF1A, IFNGR1, ABCB6, FBLN2, APP, CEBPD, JUNB, ADAMTS1, SDC2, ID4, CTGF, IRF1, IL6ST, AMOTL2, IL1RL1, ST3GAL5, FBLN5, SLC16A7, CXCL12,TNFRSF11B, ATP1B1
HUANG_DASATINIB_RESISTANCE_UP	0.538139	2.0243	0	0.0020379	81	79	LAMB3, LAYN, FXYD5, CAV2, CAV1, NNMT, ITGA5, PTRF, JAG1, ANXA1, TGFBI, COL5A1, ELK3, OSMR, PPP1R18, ARHGAP29, FSTL1, INPP1, DUSP10, IFI16, SOCS5, CAST, ZNF559, NDC80, PDGFC, LYN, MET, MSN, RIPK4, IL15RA, EGFR, PARVA, EXT1, PSMB8, ZYX, MAP7D1, DCBLD2, CALD1, CCDC50, PGM1, RAC2, EPHA2, PSMB9, ST5, BTN3A2, MAML2, UPP1, TGFBR2, SNAI2, SH3KBP1, ELL2, IFIT3, ANTXR2,PALM2-AKAP2, BTN3A3, RAI14, GBP3, TFP…
CROONQUIST_NRAS_VS_STROMAL_STIMULATION_DN	0.526326	2.02068	0	0.0021192	99	97	PTP4A3, NOTCH3, IGFBP3, FSCN1, LAMA4, GJA1, MCM7, COL4A1, TPM1, CD81, C10orf10, APOBEC3C, CDC45, TGFBI, SPARC, CDC6, IGFBP7, UBE2C, MCM2, COL1A2, TSC22D3, CKS1B, CCNB2, TPM2, MKI67, PTTG1, ACTA2, THBS2, SULF1, VCAN, AURKB, TPX2, CCNB1, TRAIP, FOXM1, DLGAP5, CCNA2, NASP, BCL6, ITM2A, EZH2, ARHGAP11A, POSTN, COL6A3, TROAP, KIF2C, DCLK1, CENPA, SBNO2, SMARCD3, H2AFX, PPP1R15A, CCNF, DUSP1, CDC20, RA…
PID_DELTA_NP63_PATHWAY	0.596534	2.01729	0	0.0021782	47	44	DLX5, CDKN2A, DLX6, IGFBP3, SFN, RAB38, RUNX1, COL5A1, TCF7L1, AXL, BDKRB2, ITGA3, FBXW7, CCNB2, PERP, ADA, NOTCH1, MDM2, BRCA2, KRT14, TOP2A, MRE11A, POU2F2, HBP1, CEBPD, YAP1, KRT5, GSK3B, ADRM1, FASN, RRAD, HELLS, ATM, FOSL2, TP63, HES1,PPP2R5A, NRG1,SEC14L2, STXBP4, GPX2, VDR, ITCH, WWP1
CHEN_HOXA5_TARGETS_9HR_DN	0.617062	2.01578	0	0.0022168	41	38	LPCAT1, FJX1, EHD2, PRR16, SERPINH1, GEMIN4, GM2A, LINC00341, SV2A,ST6GALNAC4, MARCKS, KDELR1, PCDHGC3, FAM127A, SYNGR2, GLG1, MYL9, FEN1, INO80B, LOXL1, TMEM97, CKAP4, H2AFX, SLC29A1, CBX6, SKP2, ANP32A, MAT2A, ANPEP, UBTF, AKAP1, TOMM22, WNT5B, AP1S1, DDT, G6PC3, HMGB3, FZD2
EGUCHI_CELL_CYCLE_RB1_TARGETS	0.684327	2.01329	0	0.002274	23	23	MCM7, MCM5, MCM2, NCAPG,KIF20A, NDC80, CCNE2, MCM6,KIF18A, CCNA2, HMGB2,CDC25C, CDCA8, FEN1, BUB1, NEK2, MCM3, SMC4, CENPE, KIF11, MCM4, ECT2, SMC2
GU_PDEF_TARGETS_UP	0.54968	2.01079	0	0.0023587	71	68	LAMB2, VEGFA, TGFB1, VIM, COL5A2, COL4A1, TCF4, COL4A2, SDC1, ITGA5, MAP4K4, TGFBI, COL6A2, COL5A1, LAMC1, DKK3, FN1, COL1A1, ITGA3,SERPINI1, BMP2, ZEB1, COL6A1, TCF3, COL13A1, LAMC2, PIK3CD, VEGFB, FZD8, DOCK10, LEF1, SMAD2, PTK2, COL6A3, CDH11, FZD1, RAC2, SMAD4,SERPINE1, DOCK4, FZD4,MAPKAPK2, PLCG1, ITGA6, WIPF1, COL16A1, PLCE1, SNAI2, HDAC1, TNC, MAPKBP1, SMAD1, PLCB4, SDC2, CTGF,SERPINA1, DO…
HUANG_FOXA2_TARGETS_DN	0.615113	2.00788	0	0.0024675	36	36	KRT81, LOXL2, ITGB4, CLIC3, STS, TGFBI, SPARC, PLAUR, CD44, ATP2B4, CRIP2, CDH3, GAS2L1, SCEL, COL6A1,COL13A1, SSBP2, S100A4, CDKN1A, SRPX, TGM2, CXCL2, IGFBP6, TNC, PROS1, GALNT6, CFI, STEAP3, CTSB, LEPR, ACOX2, PLAT, SMAD6, SPP1,ST6GAL1,CEACAM1
REACTOME_GPCR_LIGAND_BINDING	0.468104	2.00835	0	0.002489	408	241	KISS1R, NMB, MCHR1, HTR6, PTHLH, NTSR1, NMU, GRM8, S1PR5, ADRA1B, GPR4, OPN4, F2RL3, PTAFR, CCR10, EDN1, CALCRL, NMUR1, RAMP2, EDNRA, HRH1, CXCL5, ADM, CXCR4, CXCL16, GNB1, P2RY1, TSHR, S1PR1, ANXA1, TBXA2R, WNT9A, BDKRB1, PTGIR, ADORA3, LPAR6, P2RY14, BDKRB2, EDNRB, GNG10,ADORA2B, OPN3, FZD9, GPR39, HTR1F, CD55, GNG11, GNB4, CX3CL1,CYSLTR1, CCL20, FZD10, TACR2, PTCH2, WNT6, APLNR, S1PR4, LPAR2,A…
BOYAULT_LIVER_CANCER_SUBCLASS_G1_DN	-0.515675	-2.04366	0.0034602	0.0025148	40	40	PRSS53, VKORC1, SLC16A1, SPSB1, MBNL2, BTN3A2, TLR3, BTN3A3, KLF9, CYP4F11, ABHD2, CTSB, AIM1, SLC39A8, ACYP2, ZNF593, GBE1, MPDZ, TRIM2, KAT2B, GCHFR, HMOX2, LAP3, GADD45A, CYP7B1, GCLC, CTBS, ZNF330, GCLM, AK2, CDC14B,C14orf159, GLRX, COQ9, SDHB, HSD17B10, BLCAP, TMED5, ALDH1A1, ABCB1
VART_KSHV_INFECTION_ANGIOGENIC_MARKERS_DN	0.499391	2.00445	0	0.0025391	138	121	LECT1, TGFA, HEY2, PLXDC1, EPHA3, NOTCH3, VEGFA, TGFB1, ANGPTL4, HEYL, RAMP2, PHEX, CXCL5, CDH5, MDK, EFNA5, ATG9B, TGFB2, FRZB, DVL2, FLT4, EPAS1, PTEN, ANG, PRSS23, PDGFRB, NRP2, FZD10, PDGFC, NOTCH1, TIE1, TYMP, EPHA10, LAMA5, STAB1, MMP19, VEGFB, RHOB, ID3, FZD8, DLL1, EPHB6, MMP2, NOTCH2, CALR, EPHB4, FZD7, FZD1, EPHA2, EREG, CFH, HSPB2, CXCL1, DIXDC1, CD36, TIMP3, CXCL2,TNFRSF12A, DVL1, FGF…
CROONQUIST_STROMAL_STIMULATION_UP	0.566684	1.99905	0	0.0027473	60	56	NOTCH3, IGFBP3, FSCN1, LAMA4, TPM1, NNMT, TGFBI, SPARC, MICAL2, MYOF, IGFBP7, COL1A2, TSC22D3, LOX, COL6A1, TPM2, ACTA2, GUCY1A2, THBS2, SULF1, VCAN, CXCL3, COL6A3, LOXL1, GABBR2, SERPINE1, SMARCD3, RGS1, PPP1R15A, DUSP1, TGM2, NFKBIA, PIM2, CXCL1, CCL4, FOSB, CXCL2, IER3, IGFBP4, FOS, CCL3,HIST2H2AA3, IL6, ID1, CTGF, LUM, SPTBN1, IER2, RPS4Y1, BASP1, OLFM1, NR4A2, NUPR1, SFTPB, RGS2, SLC25A4
ROSTY_CERVICAL_CANCER_PROLIFERATION_CLUSTER	0.49019	1.99716	0	0.0028153	140	135	CDKN2A, NETO2, E2F1, DTL, KIF4A, PAQR4, MYBL2, PRC1, TYMS, TMSB10, BRCA1, KIFC1, FANCI, ASF1B, CDC6, UBE2C,KIAA0101, MCM10, MCM2, NCAPG, BID, MELK, KIF20B, KIF20A, CCNB2, CHAF1B, NDC80, MKI67, PTTG1, H2AFZ, CCNE2, AURKB, TPX2, ATAD2, GTSE1, TTK, CCNB1, CENPM, KIF18B, SLC38A1, CENPF, FOXM1, DLGAP5, CEP55, CCNA2, RRM2, HMGB2, TOP2A, ASPM, TRIP13, PBK, CDCA8, PLK1, BIRC5, HJURP, NCAPH, FEN1, KIF15, …
LINDVALL_IMMORTALIZED_BY_TERT_DN	0.525715	1.99637	0	0.002819	80	77	CRIP1, TRPV2, SLC7A1, LAMA4, ENO2, SLC43A3, CELF2, TMEM47,SH3PXD2B, ADM, FAP, NNMT,LGALS3BP, HSPG2, CPXM2, SLIT3, LRRC15, ARL4C, CRIP2, FN1, PTK7, BLM, FAM84A, ANTXR1, CTSK, PLOD2, FNDC1, MAP1B, VCAN, COL3A1, ADAM12, MDFI, LTBP2, LRRC32, MMP7, FBXO32, ELN, ITGB5, MZT1, CCDC80, SELPLG, LHFPL2, ISLR, FMOD, CREG1, CFB, LMCD1, SPECC1, CXCL1, SAT1, COPA, EGR1, NAA10, IL6, NFASC, SDR42E1, MMP3, CYR61, …
LE_EGR2_TARGETS_UP	0.511966	1.9944	0	0.0028472	108	104	CCND1, MCM7, UHRF1, MCAM, NT5DC2, ETS1, MCM5, CXCR4, RAD51, TUBB6, PRC1, CD44, RFC5, EDNRB, KIAA0101, PLEKHO1, MARCKSL1, SPRED2, EZR, DNAJC9, MARCKS, CKS1B, KIF20A, CCNB2, RBM3, PLK4, PPP1R14B, MKI67, RPL13A, H2AFZ, COL18A1, TRIM59, CSRP2, CCNB1, TCF19, CCNA2, RRM2, HMGB2, TOP2A, LSM2, CDCA8, PLK1, REEP1, BIRC5, USP1, NCAPH, IQGAP3, EZH2, BUB1, P2RX4, CDC7, LMNB1, MAD2L1, NHP2, NUSAP1, KIF2C, H2A…
CHIBA_RESPONSE_TO_TSA_UP	0.572491	1.9945	0	0.0028527	52	51	QSOX1, TGFB1,ARHGDIB, PECAM1, MMP11, CAV2, KRT19, NGFR, ITGA7, PDGFRB, CDKN2C, KRT7,TP53I11, VEGFC, COL1A2, ITGA3, RHOG, TIMP2, EFNB3, MMP19, KRT14, MMP13, HLA-A, CD9, SIVA1, IGFBP2, RING1, CD36, FOSB, TIMP3, JUNB, APRT, SOD3, FOS, CD8B, BAD, CTGF, LUM, JUP, TRIP6, HBEGF, FBN2, VTN, PLA2G6, BMP4, BMP6, ANK1, FASTK, BSG, CASP9, GLRX
ZHU_CMV_24_HR_DN	0.521107	1.99129	0	0.0028568	91	85	CCND1, LAMB2, IGFBP3, LAMA4, FKBP10, MATK, COL5A2, RUNX1, FAM46A, ADM, TPM1, CHN1, PABPC1, EFEMP1, ANXA1, COL6A2, LAMC1, IGF2, AHR, COL1A2, EPO, COL1A1, NR3C1, FLNA, LOX, TPM2, COL15A1, ACTA2, THBS2, VCAN,SERPINB6, COL3A1, CD151, WEE1, IGFBP5, TAGLN, TSPAN4,TNFRSF1A, MYLK, POSTN, CDH11, BCL2, RAB13, TPM4, TRAM2,SERPINE1, ACTG1, IGF1R, MN1, GPX1, CYP1B1, DDR2, ABL1, CNN2, MITF, CFD, TIMP3, ID2, PT…
WHITFIELD_CELL_CYCLE_LITERATURE	0.590543	1.99487	0	0.0028584	44	44	E2F1, CDC45, TYMS, BRCA1, CDKN2C, CDC6, MCM2, KIF20A, CCNB2, CCNG2, CCNE2, MCM6, CCNB1, CENPF, BRCA2, CCNA2, RRM2, TOP2A, NASP, CDC25C, PLK1, BIRC5, BUB1, CDKN1A, CENPA, MSH2, CCNF, RRM1, BUB1B, CDC20, CDKN3, PCNA, CDKN2D, AURKA,RACGAP1, NPAT, PSRC1, CDK1, CCNE1, CKS2, CDC25A, SLBP, DHFR, E2F5
SERVITJA_ISLET_HNF1A_TARGETS_UP	0.488362	1.99303	0	0.0028679	163	146	FABP7, NOL3, LGALS3, STMN2, RAB38, EFEMP2, ARHGDIB, PLXND1, VIM, MCAM, TMEM47, ANXA2, COL5A2,SERPINH1, TGFB2, FGF13, SDC1, EFEMP1, LGALS1, TGFB3, PMP22, ANXA1, GUCY1A3, SEPT4, ITGA7, SLC16A1, BGN, MMP14, GAP43, DKK3, RNASE1, IFITM1, PROCR, SCARF2, PCOLCE, IFITM3, STK17B, TIMP2, ITGB2, ADCY7, SPARCL1, NEFL, ZFHX4, COL6A1, ABCC3, THBS2, MSN, COL18A1, LAPTM5, SCARA3, NTM, COL3A1, NR2F1, LY6H, MICAL1…
KEGG_BLADDER_CANCER	0.5906	1.99075	0	0.002877	42	40	DAPK2, CDKN2A, PGF, CCND1, VEGFA, E2F1, MMP9, TP53, MAPK3, VEGFC, DAPK3, RB1, TYMP, E2F2, EGFR, MDM2, VEGFB, MMP2, CDKN1A, MYC, NRAS, RASSF1, CDK4, MAP2K1, HRAS, FGFR3, DAPK1, MAP2K2, CDH1,RPS6KA5, MMP1, ERBB2, THBS1, E2F3, KRAS, MAPK1, ARAF, EGF, RAF1, BRAF
REACTOME_CHONDROITIN_SULFATE_DERMATAN_SULFATE_METABOLISM	0.578324	1.99139	0	0.0028797	49	46	CHST14, CHST9, CSPG4, GXYLT2, CHSY3,CSGALNACT1, CHSY1, CHPF, SDC1, B3GAT3, HSPG2, B3GALT6, AGRN, IDS, CHST3, BGN, CHST15, CHST11, CHST7, CHPF2, VCAN, CHST12, GPC1, SDC3,CSGALNACT2, IDUA, GPC6, BCAN, B4GALT7, GPC2, GXYLT1, HEXB, DSE, SDC2, B3GAT2, SDC4, HEXA, CHST13, DCN, HYAL1, UST, GPC5, ARSB, GPC4, B3GAT1, GPC3
SMID_BREAST_CANCER_RELAPSE_IN_LUNG_UP	0.708759	1.98896	0	0.0029223	21	19	KRT17, NMU, CSPG4,HAPLN1, TTYH1, TNNI2,SLC7A5, MMP14, MUC16,ANP32E, FOXD1, KLK7, KLK6, PSPH, RYR1, CLIC4, KPNA4, PRAME, UCHL1
KEGG_ASCORBATE_AND_ALDARATE_METABOLISM	-0.605087	-2.02467	0	0.0029427	25	21	UGT2B15,UGT1A10, UGDH, UGT1A4, UGT1A7, UGT1A9,UGT2B10, MIOX, UGT1A3, UGT1A8, UGT1A1, UGT2A1, UGT2B4, UGT2B7,ALDH1B1, ALDH2,ALDH7A1, UGT2A3, UGT1A6,ALDH3A2,ALDH9A1
VERHAAK_GLIOBLASTOMA_MESENCHYMAL	0.469865	1.98674	0	0.0029941	216	211	LGALS3, EHD2, COL8A2, PYGL, COPZ2, FXYD5, EFEMP2, SLC16A3, FHOD1, IL4R, GCNT1, ALOX5, ANXA2, ITGA4, CASP4, ANXA4, CLEC2B, ITGA5, LGALS1, PTRF, FES, CDCP1, ANXA1, TGFBI, SHC1, COL5A1, PLAUR, LCP2, PLK3, DSC2, ELF4, TCIRG1, TIMP1, ARHGAP29, BDKRB2, MYOF, SH2B3, HFE, TRIM22, CTSZ, SWAP70, CASP1, PROCR, COL1A2,TNFRSF11A, COL1A1, RHOG, C1orf54, CLIC1, ITGB2, DOK3, LOX, CAST, SEC24D, NRP1, STAT6, ENG, …
IGLESIAS_E2F_TARGETS_UP	0.492525	1.98727	0	0.0030005	151	149	CD47, CRIP1, TMEM45A, LAMA4, GJA1, SCG2, MCM7, GNAI2, ANXA2, CDH5, COL5A2, KRT19, COL4A1, SERPINH1, MCM5, ITGB1, GNB1, LGALS1, GSN, PMP22, ANXA1, TUBA1A, CD34, BAX, COL6A2, SPARC, EVL, LMNA, SEPT7, CDC6, CTSZ, CCND2, COL1A2, COL1A1, TUBA1B, TUBB, CKS1B, NID1, TYROBP, CYFIP1, COL15A1, NID2, ACTA2, CNN3, COL18A1, LAPTM5, SERPINB6, LYL1, CRTAP, GAS6, COL3A1, EMP1, NFIB, RHOB, ITM2A, S100A6, AKIRIN2,…
BILANGES_SERUM_RESPONSE_TRANSLATION	0.622194	1.98605	0	0.0030209	37	33	RPL4, RPL10, RPS8, RPL6, RPL14, RPS19, RPS4X, RPS3, EIF3H, EEF1G, RPL18A, RPL29, RPS5, NSA2, RPS6, EIF3F, TCF7L2, EEF1B2, EEF1A1, RAVER2, KIF21B, RPS7, KHSRP, PTMS, RPL21, ARID5B, MYL3, TNRC6B, ARL4D, DNM1,CYP17A1, CPT1B, SYT10
BOQUEST_STEM_CELL_DN	0.467839	1.98463	0	0.0030473	216	208	ALDH1A2, SCARF1, JAG2, PCDH17, IL3RA, MYCT1, PTPRM, CLEC1A, MCF2L, BST2, PCDH12, ANGPT2, GIMAP5, GMFG, PTPRE, PECAM1, CDH5, RASGRP3, RPS6KA2, DOCK9, PLVAP, RAPGEF4, MPZL2, CYTH1, FLT1, ISG20, S1PR1, NOTCH4, GIMAP4, SEMA3F, FLI1, ERG, RAPGEF5, CAPN11, PRKCH, GIMAP6, ARAP3, LCP2, IFI44L, NR5A2, SCARB1, CD93, RASIP1, LPAR6, TM4SF1,ARHGEF15, SH2B3, TSPAN13, VWF, RNASE1, SWAP70, ICAM2, EFNB2, ETS2, PH…
ROZANOV_MMP14_TARGETS_SUBSET	0.619256	1.9837	0	0.0030489	33	31	LAMA4, PLXND1, MDK, COL4A1, CHSY1, SERPINH1, COL4A2, EMILIN2, EFEMP1, COL6A2, COL5A1, FN1, NR3C1, LOXL3, PLOD2, COL6A1, COL18A1, SULF2, ANGPTL2, CALD1, TIMP3, HAS2, PTGS1, PAEP, ANKRD1, MATN2, GJB2, HHIP, HIF1A,TNFRSF11B, LAMB1
REACTOME_METABOLISM_OF_AMINO_ACIDS_AND_DERIVATIVES	-0.393208	-2.02182	0	0.0030615	200	172	INHA, AMD1, OAZ2, IDO1, INHBB, CBS, PSMF1, INHBA, PSMD10, SMOX, HDC, PSMB8, SRM, PSMD3, SQRDL, BCAT1, OAZ3, TDO2, SLC6A8, MTAP, PSMB10, PSMD13, PSMB9,ALDH18A1, PSMB1, PSMC1, DIO3, PSMA1, PSMA6, PSMD4, SAT1, DIO2, PSMC3, PSMB2, GLS2, CKMT1A, ASNS, PCSK1, PYCR1, CNDP2, PSMD5, MAT2A, PSME1, PSMD8, PSMD12, ETHE1, PSMA4, CSAD, ARG1, PSMB4, CPS1, CKMT1B, INHBE, AZIN1, PSMB7, PSMC6, BCKDHA, OAZ1, PSPH, …
AMUNDSON_POOR_SURVIVAL_AFTER_GAMMA_RADIATION_2G	0.476539	1.98074	0	0.0031637	171	162	AMD1, CCND1, LAMB2, INPP5D, ZNF532, ANXA2P1, RPS8, PML, ABT1, FKBP9, SYDE1, MID1, GMFG, ANP32B, ANXA2, PLK2, ANXA2P2, TMEM184B, NXN, ITGB1, RAD51, RHBDF1, AGRN, LMNA, LAMC1, REXO4, CD93, ARHGAP29, MYOF, KANK2, ARHGAP15, ZNF22, CSK, HNRNPD, RBFOX2, MYB, HCLS1, GNG11, CD63, ANXA5, MAPRE2, TRIM27, VAMP3, CNN3, DAZAP1, CRTAP, MFSD11, WWTR1, GPC1, NFIB, NKG7, ZNF200, NASP, DLG5, NFYA, TSPAN4, KIF21B, …
LEE_LIVER_CANCER_SURVIVAL_DN	0.475395	1.97817	0	0.0032125	175	164	ZNF532, PLP2, NPM1, RPL38, RPL12, MCM7, ANLN, UBA2, NAP1L1, KRT19, HNRNPA1, FBL,SERPINH1, ANXA4, RPL17, PRMT2, RPS3, RPL31, KHDRBS1, ITPR3, RPS18, AGRN, DBNDD2, SEPT7,KIAA0101, MCM2, TUBA1B, RPL35, RPS5, DYRK2, TOPBP1, LXN, CLIC1, RPS6, LYAR, MARCKS, SUMO2, KLF5, PTMA, TES, RPS9, CTBP2, MFSD10, MCM6, ATAD2, RPSA, TTK, DEPDC1, CCNB1, CENPF, DLGAP5, DEK, CCNA2, YWHAH, YWHAQ, RCC2, HMGB2, RALA, RPS3…
BIOCARTA_CELLCYCLE_PATHWAY	0.67143	1.97732	0	0.0032766	23	23	CDKN2A, CCND1, CCND3,CDKN2B, E2F1, CDK2,CDKN2C, CCNA1, CCND2, RB1, CDK6, CCNB1, CDK7,CDKN1A, CDK4,CDKN1B, RBL1,CDKN2D, CDK1, CCNE1, TFDP1,CDC25A, CCNH
VANHARANTA_UTERINE_FIBROID_UP	0.576404	1.97634	0	0.0032843	45	44	DDB2, CCND1, LOXL2, FDXR, EDNRA, MMP11, COL5A2, COL4A1, COL4A2, TYMS, CRMP1, FN1, EFNB2, ITM2C, COL1A1, GPM6B,STARD13, SULF1, HEPH, COL3A1, LTBP2, ERCC3, PDE8B, IGSF3, MFAP2, ART4,TMSB15A, SOX4, ZMAT3, TFAP2C, SPCS3, HRASLS, HTR2B,HSD17B6, MEST, PRKCB, TGOLN2, PLP1, UBR2, COL9A2, TRPS1, ZFYVE9, SATB2, NAV2
LEIN_ASTROCYTE_MARKERS	0.613951	1.97106	0.0014104	0.0034867	42	35	GJA1, PLA2G7, ALDOC, S1PR1, GSN, SEPT4, SPARC, MFGE8,SLC6A20, ATP1A2, CD63,SPARCL1, CLU, STAB1, ID3, MLPH, GFAP, ITGB5, C1QA, CLDN5, ITGAM, SOX8, CST3, SELPLG, BCAN, PRDX6, MT1A, EMX2, AQP4, MAGI1, DIP2A, GLUL, APOE, DBI, GLDC
KEGG_P53_SIGNALING_PATHWAY	0.539459	1.97126	0	0.0034962	69	65	CDKN2A, DDB2, CCND1, CCND3, IGFBP3, SFN, TP53, BBC3, CDK2, TP53AIP1, BAX, PTEN, SHISA5, PPM1D,TNFRSF10B, CCND2, BID, CCNB2, PERP, CCNG2, CDK6, CCNE2, FAS, GTSE1, SIAH1, CCNB1, MDM2, RRM2, CASP8, CASP3, SESN1, CDKN1A, SERPINE1, CDK4, TSC2, APAF1, CHEK2, TP73, CHEK1, CCNG1, EI24, ZMAT3, MDM4, CDK1, CCNE1, PMAIP1, RRM2B, RFWD2, ATM, RCHY1, STEAP3, CD82, IGF1, THBS1, CCNB3, TP53I3, GADD45G, GADD45B, …
DASU_IL6_SIGNALING_UP	0.555319	1.97005	0	0.0035082	59	57	NMB, CD47, FCHO1, TGFB1, STMN2, SORBS3, TAPBP, PLEC, AGRN, TNFAIP6, ENG, COL6A1, IRF9, CEBPB, GAS6, HLA-F, VEGFB, FAM189B, LY6E, MGRN1, CXCL3, KHSRP, HTRA1, ATP2B1, MAFF, GEM, EMILIN1, COL16A1, SOX4, PLA2G4C, ZFP36L2, TFAP2C, DNM2, IER3, MAP2K2, IRAK1, NAGPA, FASN, ANPEP, IL6, ZFP36, MMP3, RGL1, MMP1, PDPN, SREBF1, TMEM158, CCL2, PTGES, CKS2, CDC25B, DNM1,HIST1H2AC,HIST2H2BE, HSPA1A, IFI30, SOD2
YANG_MUC2_TARGETS_DUODENUM_6MO_DN	-0.634201	-2.00697	0	0.0036317	21	18	GSTM1, GSTA4, REG1A, GSTM5, GSTT1,CYP4A11, FMO1, GSTM4, CYP2B6, NQO1, ME1, GSTK1, FMO5, NFE2L2, POR, EPHX2, CAT, CYP4V2
CROONQUIST_IL6_DEPRIVATION_DN	0.500547	1.96728	0	0.0036525	98	97	PTP4A3, LIG1, MCM7, CHAF1A, FRZB, APOBEC3C, CDC45, MYBL2, TYMS, BRCA1, KIFC1, FANCI, CDC6, UBE2C, KIAA0101, MCM2, POLE2, CKS1B, CCNB2, PLK4, MKI67, PTTG1, RFC4, CCNE2, AURKB, TPX2, TTK, CCNB1, TRAIP, FOXM1, CCNA2, WEE1, RRM2, HMGB2, TOP2A, TRIP13, NASP, ITM2A, PLK1, NCAPH, BUB1, LMNB1, MAD2L1, KIF2C, CENPA, SBNO2, OIP5, KNTC1, CCNF, POLD1, BUB1B, CDC20, ANP32E, CDKN3, MCM3, SMC4, SNRPA1, GMPS, SP…
HOSHIDA_LIVER_CANCER_SURVIVAL_DN	-0.416035	-2.00749	0	0.0036536	113	105	RFC2, RLF, EIF2B1, FAM129A, ERCC5, CALCR, PTPN2, DLGAP4, TRAF6, PLA2G16, PTPN18, NENF, MSH6, ADRA2B, ZBTB17, TDO2, ZNF185, CREB1, TMEM97, RRM1, DOCK4, SCG5, CCT8, CPOX, EMD, AKR1D1, PLCB3, MZB1, ATP2C1, PROS1, DAD1, GSTM1, SRSF2, RPS6KA5, ATP5D, IGF1, ARF4, TAF1C, DST, PLG, HABP2, HAAO, AR, ADH6, PKLR, PSMB3, C4BPB, SNX10, VPS41, XPA, SLC4A4, SLC37A4, CYP2B6, PIGK, C8B, POLRMT, BAIAP2, SREBF2, TX…
YAMASHITA_METHYLATED_IN_PROSTATE_CANCER	0.58075	1.96253	0	0.0038324	57	39	TRPV2, GPNMB, DYSF, EBF1, PRAF2, FUNDC2, SPARC, TM4SF1,C10orf99, COL1A1, HEPH, NNAT, GAS6, MMP13, IGFBP5, AEBP1, MMP7, TAGLN, DPEP2, RBP7,SERPINE1, PLAC8,C16orf54, RGS17, TFPI, FCER2, S100A8, ANKRD1, S100G, SLC34A2, KLK6, AMN1, PTGES, OPTN, HSPA2, CYP1A1, SPP1, CCDC68, G0S2
LINDGREN_BLADDER_CANCER_HIGH_RECURRENCE	0.568861	1.96259	0	0.0038441	49	47	CRIP1, LAMA4, MCAM, DPP7, COL5A2,SERPINH1, COL4A2, MOB3A, LGALS1, SPARC, PELO, MICAL2, NRP2, MYADM, COL1A2, ADAM19, FYN, NID2, MSN, COL18A1, VCAN, MGP, BIRC3, ABI3BP, PRRX1, AEBP1, MYL9, CSRP1, MYLK, HTRA3, PTMS, IL7R, ICAM3, PLCB4, ANXA6,RPS19BP1, IL32, NR4A1, H1F0, DNMT3B, DCAF7, VCAM1, NDRG2, RHBG, UBR4, PAPPA, NAV2
LU_TUMOR_ENDOTHELIAL_MARKERS_UP	0.656492	1.96326	0.0015385	0.0038482	22	22	PLXDC1, COL5A3, HSPA6, MMP9, CHN1, RPS11, LCP2, PAMR1, TNFAIP6, FZD10, VCAN, HOPX, ADAP2, TWIST1, ADAM12, POSTN, MXRA5, STC1, PMAIP1, EGFL6, WDR77,TNFRSF21
PID_A6B1_A6B4_INTEGRIN_PATHWAY	0.580527	1.9597	0	0.003978	46	44	COL17A1, LAMA3, LAMB2, SFN, LAMB3, LAMA4, ITGB4, MST1R, ITGB1, PMP22, SHC1, LAMC1,RPS6KB1, MET, RAC1, AKT1, LAMC2, EGFR, LAMA5, YWHAH, YWHAQ, YWHAZ, CD9, LAMC3, ITGA6, HRAS, RXRA, YWHAG, CASP7, YWHAE, CDH1, RXRB, LAMA1, PIK3CA, ERBB2, LAMA2, MST1, PRKCA, YWHAB, PIK3R1, EGF, GRB2, ERBB3, LAMB1
BIOCARTA_G1_PATHWAY	0.638858	1.95905	0	0.004025	28	28	CDKN2A, CCND1, TGFB1,CDKN2B, E2F1, TGFB2, TP53, TGFB3, CDK2, CCNA1, RB1, CDK6,CDKN1A, SMAD4, CDK4,CDKN1B, ABL1, HDAC1, SKP2, GSK3B, CDK1, CCNE1, ATM, TFDP1,CDC25A, SMAD3, DHFR, ATR
ELVIDGE_HIF1A_TARGETS_UP	-0.466651	-1.99547	0	0.004107	67	64	AMD1, CCND3, SLC24A3, CCDC86, SLC35C1, SRM, RRS1, RAB35, HHEX, GABBR2, SLCO3A1, CORO1A, RRP15, RRP12, TAF9B, SLC29A1, URB2, PNO1, RPP25, SOBP, SLC35B1,C14orf169, GPATCH2, OSTM1, GYG1, ATP6V0A2, RFK, GDPD3, POLR3K, SOCS2, TOR3A, RPP40, MRPS12, PSEN2, DOLK, GULP1, SPAG1, SLC7A6, KPNA1, LSG1, FASTKD5, JAK2, GCH1, SEC23IP, STX3, CHKA, CXCL12, SLC25A44, ABCF2, C18orf8, DNAJA1, SLC5A6, ADAT1, IDH3A, PS…
SARRIO_EPITHELIAL_MESENCHYMAL_TRANSITION_UP	0.475201	1.9575	0	0.004123	180	168	FBXO41, FJX1, RFC2, TUBB4B, IGFBP3, E2F1, DTL, CDCA7, MCM7, ANLN, UHRF1, RUNX1, TGFB2, MCM5, ENC1, RAD51, CDK2, CDC45, TUBA1A, LRRC8C, PLAUR, PRC1, TYMS, PKMYT1, PGK1, SMTN, MMP14, RFC5, BRCA1, ASF1B, CDC6, VEGFC, MCM2, PHLDA1, TUBB, BLM, EIF1AD, RELT, CKS1B, BRIX1, PLK4, NDC80, PHF19, MKI67, RFC4, HOXC13, VCAN, EXO1, MCM6, CCNB1, CEP55, TUBB3, CCNA2, YWHAH, RRM2, TOP2A, ASPM,TNFRSF10A, ENO1, SKA…
HEDENFALK_BREAST_CANCER_BRACX_UP	0.684053	1.95499	0	0.0042059	20	20	RPL15, RPL19, CHPF, RPS4X, RPL31, COL6A2, SPRY1, RPS13, RPS5, UBA52, ADNP, JUNB, RPP30, PNOC, KDM6A,APOBEC3B, TANK, MCF2, CYP1A1, ATP5B
PANGAS_TUMOR_SUPPRESSION_BY_SMAD1_AND_SMAD5_UP	0.488525	1.95329	0	0.0042076	134	124	PLXDC1, GXYLT2, RGS5, EHD2, PRKCDBP,ARHGEF25, APBB2, MCF2L, RPL22, RPL14, EFS, TMEM204, CACNA1C, CELF2, GMFG, CAV2, ETS1, TCF4, LBH, GSN, CCDC85B, PTPN12, ZNF423, SEPT4, TGFBI, LASP1, RFTN1, FAM129B, NFIX, FAM110C, FSTL1, LRRK1, NEDD9, GLI1, NR3C1, S100A16, RPL22L1, NID1, MRVI1, UNC13D, FERMT3, LAPTM5,SERPINB9, TMCC3, NFATC1, NAV1, KLHL6, EMP3, TTC39A, RBMS3, TNFAIP8, MMP2, C1QA, LRIG1, CAMK2N2, …
KEGG_SELENOAMINO_ACID_METABOLISM	-0.572082	-1.99148	0	0.0042124	26	26	CBS, GGT7, GGT5, PAPSS1, LCMT1, METTL6, LCMT2, MAT2A, GGT1, MAT1A,METTL2B, GGT6,WBSCR22, HEMK1, TRMT11, AHCY, MARS2, MAT2B, CTH, MARS, AHCYL1, SCLY, AHCYL2, SEPHS1, SEPHS2, PAPSS2
GRUETZMANN_PANCREATIC_CANCER_UP	0.441514	1.95532	0	0.004227	358	349	CD47, RIN1, DGKD, LAMA3, DGKA, SLC2A1, LOXL2, P4HA1, SFN, PYGL, LAMA4, ALDOC, IL4R, ALOX5, BST2, AFAP1, MMP9, CELF2, ITGB4, MMP11, CASP4, COL5A2, CAV2, SNRPA, SERPINH1, NDRG1, ENTPD1, PXDN, ARHGAP1, FAP, CXCR4, GM2A, CYTH1, CAV1, NNMT, ISG20, SDC1, PMP22, PLEC, CRABP2, PTPN12, ANXA1, TUBA1A, APOC1, SHC1, SPARC, ITPR3, LDHA, PLAUR, GBP2, RAB31, LCP2, IFI44L, TMSB10, PGK1, PDGFRB, PTPN9, ELF4, ARL4…
ZHANG_TLX_TARGETS_60HR_DN	0.449075	1.95334	0	0.0042285	277	263	GJC1, HK2, ELOVL2, AMD1, STC2, CDCA7L,LOC284023, CDT1, LIG1, NRARP, EXOSC2, DTL, CDCA7, MCM7, ANLN, UHRF1, NT5DC2, NAP1L1, CENPH, AATF, MCM5, RAD51, SETDB1, CDC45, MYBL2, CENPK, TBL2, TYMS, CD93, PPP1R18, SYCE2, RFC5, BRCA1, FAM64A, FANCI, ASF1B, CDC6, TIMM9, SLC2A3, MCM10, MCM2, BLM, TOPBP1, NCAPG, MELK, POLE2, LYAR, IL4I1, CCNB2, CHAF1B, PLK4, SKA1, MKI67, ZBTB12, RFC4, EXO1, AURKB, MCM6, TTK, …
FARMER_BREAST_CANCER_CLUSTER_4	0.694492	1.95185	0	0.004237	19	19	COL5A2, FAP, SPARC, COL5A1, COL1A2, PCOLCE, CTSK, NID2, THBS2, FILIP1L, COL3A1, ADAM12, AEBP1, FBN1, CDH11, HTRA1, DACT1,SERPINF1, SRPX2
PETROVA_ENDOTHELIUM_LYMPHATIC_VS_BLOOD_UP	0.488335	1.94891	0	0.0043019	131	124	NPTX2, ANKS1A, DYRK3, OLFML2A, CD200, NOS2, PYGL, CALCRL, RAMP2, UNC5B, ANGPT2, GMFG, GRAP, PDLIM1, MEF2C, LDB2, NDRG1, ISG20, BTBD3, RAPGEF5, FLT4, TBXA2R, MYBL2, PCSK6, RAB31, SPRY1, LIPA, UBE2C,KIAA0101, CRMP1,KIAA1462, CKS1B, CCNB2, NDC80, EMP2, PTTG1, LYN, CCNE2, MGP, AURKB, MCM6, ITGA1, PDLIM3, TTK, CSRP2, CCNB1, NR2F1, CENPF, FOXM1, CCNA2, PEG10, HMGB2, TOP2A, RAMP3, ARRB2, RBPMS, PLK1, RE…
VERRECCHIA_RESPONSE_TO_TGFB1_C2	0.644872	1.9492	0	0.0043158	25	25	MMP16, MMP14, TIMP1, FN1, COL1A2, RHOG,MARCKSL1, ITGB2, PCDHGC3, COL6A1, COL3A1, ARHGDIA, LRP1, COL6A3, CYTH2, TIMP3, DVL1, SSR1, RHOC, CDH6, ICAM1, MMP3, WNT2B, JUP, CD82
TSENG_ADIPOGENIC_POTENTIAL_UP	0.62698	1.94934	0	0.004344	30	29	LOC284023, CDKN2B, NDN, PTPRF, CRABP2, PRSS23, ADORA2B, EFNB2, CD24, TRIB3, GJB3, TCF7, DDX47, MGP, NNAT, COL7A1, CARS, MTHFD2, RHOU, DBNL, UCK2, WISP1, FHL1, WNT10A, MAPK12, GLRB, CH25H, BMP6, BPGM
PID_HIF2PATHWAY	0.603013	1.94533	0	0.0045095	34	34	EGLN3, POU5F1, SLC2A1, VEGFA, ETS1, APEX1, EIF3E, FLT1, EPAS1, PGK1, MMP14, ELK1, EPO, KDR, ADORA2A, EFNA1, TWIST1, ABCG2, BHLHE40, SP1, EGLN1,SERPINE1, HIF1AN, SIRT1, CREBBP, EGLN2, EP300, ARNT, CITED2, TCEB1, TCEB2, SLC11A2, VHL, FXN
PID_SYNDECAN_1_PATHWAY	0.574009	1.94552	0	0.0045106	46	45	COL17A1, TGFB1, COL8A2,COL11A1, MMP9, COL5A2, COL4A1, COL8A1, SDC1, COL6A2, CASK, COL5A1, MAPK3, COL1A2, COL1A1, COL6A1,COL15A1,COL13A1, MET, PPIB, LAMA5, COL3A1, CCL5, COL7A1, MMP7, COL6A3, PRKACA,COL10A1, COL9A1, HPSE,COL11A2,COL16A1,COL12A1,COL14A1, HGF, MMP1, SDCBP, MAPK1, BSG, COL9A3, COL9A2, COL4A5, COL4A6, COL4A4, COL4A3
TONKS_TARGETS_OF_RUNX1_RUNX1T1_FUSION_GRANULOCYTE_DN	0.721191	1.94243	0	0.0045176	17	17	PDE4C, KRT86, ALOX5, CPA3, ENTPD1, GDPD5, MS4A2, PMP22, HDC, ADAM8, CYP1B1, PILRA, IL10RA,ALOX5AP, NCF1C, FCER1A, CAMK1
AMIT_EGF_RESPONSE_120_HELA	0.534103	1.94246	0	0.0045456	69	66	TGFA, IRS2, IER5, MCF2L, MATK, FOXC2, CYTH1, JAG1, PLAUR, CHST3, NDEL1,TNFRSF10B, DAXX, PHLDA1, BDNF, DUSP4, RUNX3, OGFR, VPS37B, RPS10, SNAI1, CDC27, AREG, LAT2, TAGLN, CDKN1A, IL27RA, EPHB4, ARPC4, FOSL1, BCL10, EPHA2, MCL1, CYP1B1, MAFF, GEM, ZNF747, PUS3, CXCL1, SAT1, KDM6B, CXCL2, NAB2, HNRNPH1, CDC42EP2, ZFP36L2, JUND, TBL3, C8orf4, MAP3K14, CLCF1, MAP2K3, BIRC2, DAG1, F3, JUP, HBEGF, MVD, …
TURASHVILI_BREAST_LOBULAR_CARCINOMA_VS_LOBULAR_NORMAL_DN	0.532485	1.94427	0	0.0045496	74	74	CTHRC1, COL11A1, SFRP2, MMP11, NACA, COL5A2, COL4A1, COL4A2, CXCR4, COL8A1, ASAP1, COL5A1, RFTN1, IFI44, LCP2, TYMS, BGN, LRRC15, STK39, FN1, COL1A2, COL1A1, LOX, FNDC1, ZNF805, THBS2, VCAN, EPPK1, GNA13, COL3A1, ADAM12, PRRX1, AEBP1, FBN1, TMEM119, MMP2, POSTN, COL6A3, SULF2, SRPX, COMP, LYZ, RGS1, COL10A1, MXRA5, C5AR1, TACC3, WIPF1, TAGAP, DLEU2, WISP1, THBS4, UGCG, SFRP4, ASPN,SLC25A43, BTN3A…
WHITEFORD_PEDIATRIC_CANCER_MARKERS	0.491546	1.94301	0	0.0045687	116	112	ADCY3, E2F1, CDCA7, NUDT1, MCM7, UHRF1, GINS2, MCM5, GAPDH, CDC45, MYBL2, TUBA1A, MEX3B,RNASEH2A, PRC1, TYMS, ASF1B, UBE2C, MELK, POLE2, RRP1, CKS1B, CCNB2, PLK4, EIF4A1, MKI67, PTTG1, RFC4, GPX7, CDK6, TPX2, ATAD2, TTK, CCNB1, MND1, TWIST1, CENPF, DLGAP5, CCNA2, RRM2, RCC2, TOP2A, NASP, ENO1, PBK, CDCA5, CDCA8, BCAT1, BIRC5, ILF3, NUF2, NCAPH, BUB1, NEK2, HAUS1, MAD2L1, NUSAP1, CENPA,EIF4EBP1, C…
KEGG_DILATED_CARDIOMYOPATHY	0.520156	1.94249	0	0.0045741	92	75	CACNB1, TGFB1, ADCY3, CACNB3, CACNA1F, CACNA1C, DMD, ITGB4, ITGA4, ADCY8, SGCA, TPM1, TGFB2, ITGB1, ITGA5, TGFB3, ITGA7, LMNA, CACNA1D, TPM3, ITGA3, ITGA10, ADCY7, PLN, TPM2, ITGA1, ADCY4, ADCY5, ATP2A2,CACNA2D4, PRKX, ITGB5, CACNG4, ACTC1, SGCB, ITGB8, TPM4, ITGA2, ACTG1, PRKACA, ACTB, EMD, GNAS, ITGA6, TNF, ITGA8, ITGA9, ITGA11, TTN, CACNB2, ADCY6, DES, SGCD, ITGB6, ADCY1, ADCY2, ITGB3, MYL3, D…
KHETCHOUMIAN_TRIM24_TARGETS_UP	0.562343	1.93546	0	0.0049089	47	47	LGALS3, CP, TGFB1, H19, CDKN2B, VIM, COL4A1, COL4A2, TP53, LGALS1, SPARC, CD44, IGF2, CASP1, PDGFA, COL1A2, COL1A1, LAPTM5, EMP1, HCK, CDKN1A, SAMD4A,SERPINE1, TGM2, KRT18, ITGAL, APP, TGFBR2, CYBB, JUNB, UCP2, RAI14, FOS, EGR1, ICAM1, CDH1, RBP1, HBEGF, CD38, ITGAV, AFP, SPP1, STAT1, FGFR2, VCAM1, BEX1, BTG2
REACTOME_IMMUNOREGULATORY_INTERACTIONS_BETWEEN_A_LYMPHOID_AND_A_NON_LYMPHOID_CELL	0.540166	1.93345	0	0.0050377	70	55	HLA-G, CD40, CD81, ITGB1, CD34, ICAM2, IFITM1, ITGB2, LILRB1, TYROBP, FCGR3A, LILRB4, CXADR, ULBP2, HLA-F, HLA-A, HLA-B, C3, KLRD1, B2M, FCGR2B, CD247, LILRB3, CD8A, CD3D, ITGAL, HLA-C, CRTAM, LILRB2, LILRB5, CD3E, HCST, ICAM3, CD96,KIR2DL4, CD160, ULBP3, KLRK1, CD3G,CD200R1, KLRC1, ICAM1, LILRA1, CDH1, CD8B, CD19, CD40LG, CD226, SELL, PVR, ITGB7, ICAM4, ULBP1, RAET1E, VCAM1
REACTOME_TRNA_AMINOACYLATION	-0.495835	-1.97167	0	0.0050594	42	42	DARS, HARS, RARS2, CARS, RARS, SARS, QARS, KARS, WARS2, TARS, YARS, LARS, VARS, EPRS, FARSA, FARSB, PARS2, AARS2, AIMP1, PPA1, FARS2, EARS2, WARS, YARS2, CARS2, IARS, VARS2, MARS2,EEF1E1, SARS2, TARS2, GARS, AIMP2, HARS2, MARS, IARS2, AARS, LARS2, PPA2, NARS, DARS2, NARS2
CHAUHAN_RESPONSE_TO_METHOXYESTRADIOL_DN	0.493893	1.93273	0	0.0050663	102	97	HLA-G, SLC1A4, TUBB4B, DDOST, BTF3, ARHGDIB, NCSTN, ENO2, RPL12, VIM, MXI1, PDLIM1, NAP1L1, CSNK1E, ADM, UBE2I, TAPBP, PABPC1, LSP1, UBC, LGALS1, CTDNEP1, EIF4B, UBE2J1, TMSB10, PGK1, AP3S1, TUBB, LTA4H, HSP90AB1, SEC61G, EIF3F, MARCKS, HCLS1, MKI67, ARPC5, H2AFZ, PHB2, TLN1, AP1S2, CAPNS1, EEF1A1, PTPN6, FOXO3, HSP90B1, S100A10, B2M, MCL1, CD48, GNAS, PIM2, TNFAIP3, FDPS, CTBP1, VAMP2, ADD1, WBP…
MISHRA_CARCINOMA_ASSOCIATED_FIBROBLAST_UP	0.65531	1.93225	0	0.0050945	24	23	KRT17, FXYD3, CTHRC1, TCN1, MMP9, COL6A2, PDGFRB, PDGFA, CTSK, COL6A1,TMEM156, GEM, FGR, HBA2, THY1, TNC, FOS, EGR1, CCL2, BEX5, CA12, SESN2, PLAU
MA_MYELOID_DIFFERENTIATION_UP	0.579667	1.93046	0	0.0051067	39	38	PRG2,IMPDH2,SH2D3C, MYO1C, RB1, ADA, RGL2,ELAVL3, VASP, MDM2, GZMB, EMP3, NCL,EEF1A1, DHPS,BNIP3L,CDKN1A, KLF13, MTF2, C1QA, CALR, GNAS, CREG1, PPIA, MT1A, PPM1G, KLF9, CCL19, DAD1, TIAL1, RAN, SMAD5, LATS1, FGFR4, CCT5, ITGB7,PTPN11, UBB
POOLA_INVASIVE_BREAST_CANCER_UP	0.448946	1.93088	0	0.0051113	288	265	CCL18, SOX11, CD40, COL11A1, PRR16, SLC16A3, PLA2G7, CALCRL, DTL, MMP9, MMP11, ITGA4, COL5A2, LGALS9, GINS2, RASSF2, FAP, CXCR4, CHIT1, ISG20,ARHGAP25, APOC1, COL5A1, RPLP2, PLAUR, PRC1, LCP2, TYMS,ADAMDEC1, SLC7A5, DSC2, LRRC15,ARHGAP15, CHST11, FANCI,KIAA0101, ITGAX, FN1, BLM, CD79B, STK17B, NCAPG, MELK, SLC18A2, ITGB2, ADCY7, LILRB1, TNFAIP6, HCLS1, KIF20A, CCNB2, INHBA, NDC80, CALU, GNLY, LIL…
NUTT_GBM_VS_AO_GLIOMA_UP	0.561002	1.92981	0	0.005115	46	46	LAMB2, LRRC41, DDOST, VIM, ITGB4, TAGLN2, LDHA, GAP43,SH3GLB1, FLNA, CLIC1, MSN, LAPTM5, SMOX, TMED9, AP1S2, HLA-F, GALNT2,TMEM109, CAPNS1, TMX1, CAP1, IGFBP5, CAPZB,PLEKHM2, GPI, LHFPL2, BTN3A2, FADS3,TP53BP2, RHOC, FZR1, NUCB1, RBBP4, AQP4, CD74, PIK3R2, HIPK1, MAPK4, CLIC4, DCTD, MAOB, DYNLT3, STAT1, AGL, CHL1
ZAMORA_NOS2_TARGETS_UP	0.528642	1.93125	0	0.005116	69	62	NGF, LIG1, ACLY, KRT19, ADM, MCM5, PABPC4, CDK2, RPL29, POLR1D, TYMS, NFIX, MCM2, TUBB,PPP1R14B, H2AFZ, RAC1, MCM6, RPSA, EEF1B2, GTF2F1, SRM, MIF, RHOA, YWHAH, HMGB2, DCTN1, SMAD2, CDK7, FEN1, CSRP1, ACTG1, RRM1, PCNA, PCSK7, SUPT4H1, POLR2F, APRT, MCM4, IL1RN, PTPN14, RAN, HMOX1, RBBP7, CCNE1, EED, IER2, PPA1, DNAJB1, PICK1, IFRD1, NEDD8, PDCD2, SMS, STMN1, BAG1, EIF4E2, HSPA8,ATP6V1C1, STAM, P…
REACTOME_INTERFERON_ALPHA_BETA_SIGNALING	0.551947	1.92748	0	0.0052626	64	49	HLA-G,IFNAR2, ISG20, GBP2,IFITM1,IFITM3,IFITM2, IFI6, ISG15, IRF9, OAS3, PSMB8, HLA-F, IRF7,IFNAR1, OAS2, HLA-A, TYK2, MX1, PTPN6, IRF3, IFI27, XAF1, HLA-B, JAK1, OASL, IRF2, STAT2, HLA-C, MX2, PTPN1, SOCS3, IFIT3, IRF4, OAS1, IP6K2, IFI35, EGR1, IRF8, IFIT2, IFIT1,RNASEL, IRF1, SOCS1, IRF6, STAT1, ADAR, USP18, IRF5
LY_AGING_PREMATURE_DN	0.610909	1.92616	0.0014706	0.0053146	30	28	FBL, MYBL2, TYMS,PKMYT1, MCM2, HMGN2, CKS1B, CBX1, FOXM1, HMGB2, NASP,RANBP1, KIF2C, BARD1, CENPA, H2AFX, ENPP2, CCNF, SAFB, MCL1, UGCG, HAS2, MMP3, PTGS2,DDX39A, PARP1, NUP88,CDC25B
FURUKAWA_DUSP6_TARGETS_PCI35_UP	0.532622	1.92577	0	0.0053152	74	62	KRT17, FXYD3, RTP4, OLFML2A, TMCO4, LRRC4C, CLEC2D, MDK, TGFB2, C15orf48, KCNMB1, CNTNAP1, OFD1, RCN3, RNASE1, PYCARD, CD24, IFITM1, SNED1, LYPD5, DUSP4, SNRPB, ARHGEF37, SAA1, HLA-F, MAPK11, KRT14, ID3, SLC15A3, PSMB9, TNFSF13B, PARP9, APH1B, EPB41L4A, HERC6, C19orf66, FOLR1, PMM2, SOX4, MUC20, SLC2A10, PHF11, HMOX1, C1S, IL32, SECTM1, TAPBPL, CLDN16, ENPP5, HRASLS2, RARRES3, ZFAT, TNNC1, ALDH1B…
KEGG_MELANOMA	0.541681	1.92479	0	0.0053164	71	59	CDKN2A, FGF11, CCND1, PDGFD, E2F1, FGF13, TP53, PTEN, MAPK3,PDGFRB, PDGFA, RB1, PDGFC, MET,PIK3R5, CDK6, E2F2, AKT1, EGFR,PIK3R3, MDM2, PDGFB,PIK3CD,PIK3CB, FGF14,CDKN1A, NRAS, CDK4, IGF1R,MAP2K1, AKT3, HRAS, MITF, FGF18,MAP2K2, CDH1,PIK3CG, FGFR1, BAD, FGF12, HGF,PIK3CA, IGF1,PIK3R2, FGF7, E2F3, FGF2, FGF1, KRAS, MAPK1, ARAF, FGF5,PDGFRA, AKT2, FGF9,PIK3R1, EGF, RAF1, BRAF
NABA_CORE_MATRISOME	0.447493	1.9265	0	0.0053328	275	234	LGI4, COL21A1, COL5A3, COL17A1, CTHRC1, PODNL1, COL23A1, LAMA3, LAMB2, IBSP, ACAN, IGFBP3, COL8A2, PRG2, LAMB3, VWA1, COL11A1, LAMA4, HAPLN1, EFEMP2, FBLN7, ESM1, COL5A2, THBS3, COL4A1, COL4A2, HAPLN3, PXDN, HAPLN2, EMILIN2, COL8A1, CILP2, EFEMP1, VWA2, WISP2, HMCN1, TGFBI, COL6A2, HSPG2, SPARC, AGRN, COL5A1, LAMC1, MFGE8, SLIT3, BGN, MATN3, IGFBP7, VWF, FN1, SNED1, COL1A2, COL1A1, PCOLCE, TNFAIP…
REACTOME_SMOOTH_MUSCLE_CONTRACTION	0.652146	1.9249	0	0.0053468	25	23	SORBS3, TPM1, TPM3, TPM2, ACTG2, ACTA2, ITGA1, TLN1, MYL9, MYH11, ITGB5, MYLK, CALD1, TPM4, CALM3, LMOD1, MYL6,MYL12B, CALM2,SORBS1, VCL, CALM1, MYL6B
REACTOME_GOLGI_ASSOCIATED_VESICLE_BIOGENESIS	-0.471409	-1.96211	0	0.0056337	53	50	BLOC1S3, ARF1, AP3S1, AP1S2, TXNDC5, SNAPIN, AP4B1, VAMP2, CPD, DNM2,TBC1D8B, FTH1, TFRC, DTNBP1, NECAP1, PUM1, IGF2R, ARRB1, AP1M1, AP1S1, SORT1, TGOLN2, CLTA, FTL, SH3D19, SNX9,BLOC1S1, YIPF6, AP4E1, RAB5C, SH3GL2,PIK3C2A, GAK, NAPA, VAMP8,TPD52L1, OCRL, HSPA8, PICALM, CLTC, SNX2, TPD52, AP3B1, DNAJC6, AP1B1, SNX5, AP1M2, AP1G1, VAMP7, HIP1R
HOOI_ST7_TARGETS_DN	0.485729	1.9186	0	0.0057335	123	110	PDLIM4, PFKFB4, CRIP1, GXYLT2, VASH1, C4orf47, TMEM45A, ANGPTL4, CCDC141, PLA2G7, ENO2,CSGALNACT1, TCN1, PHEX, VIM, PDK1, TRIB2, MCAM, OBSL1, SPRY4, NDRG1, CXCR4, CXCL16, NNMT, C10orf10, SPARC, TM4SF1, ZBTB47, PPP1R3B, FN1, COL1A1, STK17B, RNASE4, KDR, RIN2, PPFIA4, ZDHHC13, CCNG2, FAM131B, APOBEC3G, KCTD15, MMP13, IGFBP5, RBPMS,MIRLET7BHG, RAP2A, TSPAN31, PSMG4, PPL, FUS, ITPR1, LRRFIP2, FOXA1, …
MIYAGAWA_TARGETS_OF_EWSR1_ETS_FUSIONS_DN	0.450371	1.91679	0	0.0058414	229	201	CA9, PDLIM4, MAP2, LRRC17, STC2, LOXL2, HR, QSOX1, IGFBP3, COL11A1, PRR16, GPNMB, PRDM1, GCNT1, LSM11, FIBCD1, RPS6KA2, FAM198B, ADM, CHN1, ARHGAP1, COL8A1, RGMB, C3orf58, TLE1, SPARC, COL5A1, SPRED1, RFTN1, CD44, MICAL2, OSMR, ADAMTS5, MMP14, TANC2, ZNF365, SLC1A3, SLC2A3, CHST7, PLXNA1, PHLDA1, COL1A2, ADAM19, NR3C1, ACTN1, MARCKS, IRS1, PLOD2, SEC24D, NRP1, INPP4B, ACTG2, NID2, UNK, VCAN, FILI…
GOTZMANN_EPITHELIAL_TO_MESENCHYMAL_TRANSITION_UP	0.521083	1.91652	0	0.0058451	69	66	PKP1, INHBB, EDN1, IL4R, COL5A2, COL4A1, COL4A2, CHRNB1, ITGB1, TGFB3, TIMP1, BRCA1, IGFBP7, FN1, PDGFA, COL1A1, INHBA, PLK4, MKI67, LY75, ACTA2, CLU, COL18A1, RPSA, SNAI1, COL3A1, NR2F1, S100A6, GLG1, PPIC, CENPA,SERPINE1, CSF1, CYP1B1, MCM3, FBLN2, JUN, MAP4, RBL1, TIMP3, CHEK1, TNC, RBBP6, HMGB1, SMAD1, PROS1, FURIN, TEAD2, ZFX, TPP2, DCK, PLA2G4A, TRAF3, CTGF, CCT6A, CCL2, SMARCD1,PAFAH1B1, N…
FRASOR_RESPONSE_TO_SERM_OR_FULVESTRANT_DN	0.55897	1.91437	0	0.0059303	50	49	RFC2, E2F1, EXOSC2, NUDT1, MCM7, MCM5, CHAF1A, MAZ,RNASEH2A, RFC5, CDKN2C, UBE2C, MCM2, BLM, CKS1B, MYB, MCM6, CENPF, FOXM1, CCNA2, WEE1, PRIM1, BRPF1, RNF126, MYC, KIF2C, BARD1, H2AFX, RRM1, POLE, CDC20, MCM3, SDCBP2, FADS3, TK1, TTLL4, NFRKB, KIF11, POLA2, AURKA, CDK1, CAP2, HOXA11, STMN1, CDC25B, CDK8, POLRMT,TIMELESS, MTHFD1
LIM_MAMMARY_LUMINAL_MATURE_DN	0.493889	1.91438	0	0.0059632	99	95	DAPK2, HEY2, IRS2, STAC2, RASL12, IGFBP3, CYGB, JAG2, RAP2B, VIM, TMEM47, ETS1, COL4A1,SERPINH1, COL4A2, EMILIN2, MAP4K4, FAM49A, TUBB6, COL6A2, RASA3, SLC1A3, LMO4, FSTL1, CASP1, DPYSL2, BCL11A, SPARCL1, FAM13A, COL6A1, GPX7, WTIP, EGFR, FAS, FRMD4A, GAS6, NFIB, AEBP1, GYPC, FBXO32, CALD1, FZD1, EPB41L2, HTRA1, FABP5, TSPAN2, PKD2, NES, LRIG3, ZNF521, RECK, COL16A1, SNAI2, SORBS1,PRICKLE1, PCF11…
GENTLES_LEUKEMIC_STEM_CELL_UP	0.611933	1.91323	0	0.0059751	29	26	MEF2C, LGALSL, GUCY1A3, CD34, GIMAP6, GIMAP7, HECA, EBF3, HLF, HOPX, SLC38A1, BIRC3, RBPMS, EVI2A, SETBP1,PCDHGA10, MMRN1, GIMAP2, VNN1, SH3BP5, ICAM1,TMEM200A, LTB, SLC37A3, ABCC2, FBXO21
PID_P73PATHWAY	0.511623	1.91219	0	0.006061	79	74	HEY2, IL1RAP, SFN, JAG2, PML, IL4R, AEN, BBC3, RAD51, CASP2, RELA, CDK2, TUBA1A,TP53AIP1, BAX, PLK3, PEA15, DEDD, RB1, ADA, GRAMD4, PFDN5, CDK6, CCNE2, FAS, CCNB1, DCP1B, MDM2, FBXO45, BRCA2, MAPK11, CCNA2, PLK1, FOXO3, SP1, JAK1, BUB1, CDKN1A, MYC, KAT5, FLOT2, HSF1,SERPINE1, SIRT1, ABL1, BUB3, TP73, PIN1, UBE4B, YAP1, CHEK1, EP300, FASN, BCL2L11, CDK1,SERPINA1, RCHY1, S100A2, TP63, NEDD4L, RNF4…
HE_PTEN_TARGETS_UP	0.7069	1.91091	0.0031646	0.0061459	16	16	CCND3, CCNI, TGFB2, TP53, ITGB1, ELK3, PDGFA, RB1, CDK6,PLAGL1,CDKN1A, MAF, ECT2, FGF1, MYCN, AKT2
LIU_PROSTATE_CANCER_DN	0.427761	1.9096	0	0.0061731	481	445	GPR87, KRT17, GJC1, DUOX1, PDLIM4, KRT15, PGF, DDB2, ANO1, PDGFD, AHNAK2, LAMB2, VEGFA, RASL12, EHD2, TGFB1I1, LAMB3, MARVELD1, LAYN, KSR1, LAMA4, TMEM185A, EFEMP2, GJA1, SGCE, PREX2, NEURL1B, ENO2, KRT23, HOXD13, TRPC4, UNC5B, EFS, GRK5, SSPN, DMD, MCAM, TRAF5, ANXA2, SH3PXD2B, FGD5, CAV2, PDLIM1, ANXA2P2, KRT19, CD248, COL4A1, COL4A2, TPM1, SH3PXD2A, TGFB2, TMEM100, CHN1, FEZ1, MPZL2, CAV1, SCG…
KEGG_SMALL_CELL_LUNG_CANCER	0.501877	1.90998	0	0.006183	84	83	CCND1, LAMA3, LAMB2, NOS2, LAMB3, LAMA4,CDKN2B, E2F1, TRAF5, PIAS2,COL4A1,COL4A2, TP53, ITGB1, RELA, CDK2, PTEN, LAMC1, PIAS3, FN1, ITGA3, CKS1B, RB1,PIK3R5, CDK6, E2F2, CCNE2, AKT1, LAMC2, TRAF6,PIK3R3, LAMA5,PIK3CD,PIK3CB, BIRC3, PTK2, MYC, BCL2, ITGA2, CDK4, TRAF2, AKT3,NFKBIA, APAF1,CDKN1B, LAMC3, ITGA6, PIAS1, RXRA, IKBKG, SKP2, MAX,BCL2L1,PIK3CG, RXRB, LAMA1, PIAS4, RARB, BIRC2, TRAF3, CCNE…
NOJIMA_SFRP2_TARGETS_DN	0.649691	1.90827	0	0.0062444	25	23	CCND1, BST2, CXCL5, IFI44, CD44, PYCARD, IFITM1, GAS2L1, MET, GRN, EGFR, MDM2, MX1, MMP7,TACSTD2, TRIM14, BCL2L1, IGFBP4, DDX11, TSPAN5, SGPL1, STAT1, RAD21
GROSS_HYPOXIA_VIA_ELK3_AND_HIF1A_UP	0.473876	1.9079	0	0.0062516	142	136	KCTD11, PGF, HK2, LHX9, SLC2A1, P4HA1, VEGFA, PRKCDBP, EDN1, VWA1, ANGPTL4, ENO2, MXI1, INSIG2, PDK1, ANXA2, ETS1, NAP1L1, PLK2, TPI1, SPRY4, NDRG1, CRTC3, DUSP14,C10orf10, GPRC5A, JAG1, CD44, CD93, PGK1, TM4SF1, PPP1R3B, PHLDA1, RBPJ, DUSP4, NEDD9, LXN, ALDH1L2, PNRC1, LRP5, HIGD1A, SMOX, TRAF6, RCOR1, PGAM1, PPRC1, DDX39B, RARS, KLF4, BNIP3, ARL6IP5, CHIC2, KLF6, BCL10, SERTAD2, ERRFI1, NFKBIA,…
MARTORIATI_MDM4_TARGETS_FETAL_LIVER_UP	0.448994	1.90707	0	0.0062816	227	207	FABP7, PRELID2, PVT1, EGLN3, HK2, SAP30, PPP1R3G, STC2, DYRK3, PTP4A3, ANKRD37, P4HA1, RHBDF2, JAG2, RAP2B, TMEM45A, CPNE2, WDR54, PHLDA3, PDK1, PFKP, KRT19, AEN, ADM, NDRG1, VLDLR, CD81, CAV1, GNB1, ANO3, RPL34, DDIT4, CPT1C, PGK1, JDP2, ZAK, ZNF365, VWF, SLC2A3, PHLDA1, EXOC4, PTK7, IFITM3, COMMD2, RPS12, PLOD2, PERP, RB1, SP6, KCNE3, WNT6, HIGD1A, HOXD1, WTIP, TAP1, PITPNC1, PPP1R3C, MDM2, RAL…
WIEDERSCHAIN_TARGETS_OF_BMI1_AND_PCGF2	0.537251	1.90642	0	0.0063227	57	53	PTHLH, CCND1, EDN1, ITGA4, BMP1, ADM, TPM1, CAV1, COL5A1, PLAUR, MICAL2, AXL, MYOF, ITGA3, ADAM19, INHBA, CPA4, CDK6, LRRC8A, MAP1B, NTM, NAV1, SDC3, CLDN1, MICALL1, P4HA2, MMP7, ITGB8, CCDC80, MICB, FOSL1,CRISPLD2, JUN, IL7R, KCNN3, TIMP3, FAM43A, LFNG, PODXL, ABLIM3, BMP5, S100A2, F2RL1, SAFB2, DNMT3B, PLAT, RHOD, NET1, GADD45A, TEK, PAPPA, NAV2, BCL7A
PRAMOONJAGO_SOX4_TARGETS_UP	0.537792	1.90499	0	0.0064031	52	51	STC2, VEGFA, MXI1, INSIG2, RIT1, ADM, NDRG1, CXCR4, GPRC5A, KDM3A, TPBG, ELF4, SLC2A3, PHLDA1, TRIB3, DUSP4, CCNG2, GRB10, BTN2A1, RND3, MYD88, BHLHE40, BNIP3, AMPD3, RBCK1, NFIL3,SERPINE1, RIOK3, MAFF, JUN, TNFAIP3, TIPARP, STC1, NAB2, PHF1, JUND, IER3, SMNDC1, BTG1, CLK1, TNIP2, ZFP36L1, PLIN2, AK4, FGD6, CCNL1, IL1B, GDF15, SOD2, TRIM8, CAPRIN2
LIEN_BREAST_CARCINOMA_METAPLASTIC	0.593651	1.90316	0.0014265	0.006511	35	35	KCNE4, ACAN, SFRP2, MCAM, MSX1, MMP16, P4HB, SPARC, ADAMTS5, IGF2, PDGFA, TPM3, THBS2, COL18A1, RARRES2, PRRX1, EDIL3, POSTN, TPM4,PPP1R12A, HTRA3, PKD2, RUNX1T1, TIMP3, COL16A1, SFRP4, MXRA8, TBX2, STAG2, TMEM217, LUM, THBS1, PDGFRA, IQCA1, HOXA7
PIONTEK_PKD1_TARGETS_UP	-0.49742	-1.94646	0	0.0065448	38	37	NDRG1, ERRFI1, MT1A, SGK1, CTGF, MT2A, MPV17L, FKBP5, PIM3, PRODH, ACSM5, SLC17A1, HAAO, CYP27B1, SLC13A3, SCD,SLC22A12, ACOX2, GLUL, HAO2, RDH16, SLC27A2, GK, KLF15, DNASE1, ENTPD5, SORD, AASS, EGF, UGT1A6, GGCT, TOM1L2, ALDH8A1, UGT3A2, PTER, ARG2,TNFRSF21
REACTOME_PHASE1_FUNCTIONALIZATION_OF_COMPOUNDS	-0.448741	-1.94734	0	0.0065745	70	56	SMOX, TBXAS1, FMO3, CYP2J2, CYP1B1,CYP2C18, CYP2C8, CYP2R1, PTGIS, PTGS1,CYP21A2, CYP2A6,CYP4F11, CYP8B1, PTGS2, POMC, CYP2E1, CYP2S1,CYP46A1, CYP4B1,CYP26B1, CYP4F2, CYP3A5,CYP27A1,CYP27B1, CYP2U1, ADH6,CYP4A11, FMO1, CYP4F3, MAOB, CYP2D6,CYP17A1, ADH1A, CYP2B6,CYP24A1, CYP3A4, CYP1A1, PAOX,CYP4F12, ADH1B,CYP39A1, CYP3A7, CYP1A2, ADH1C, ALDH2, CYP7B1, ACSS2, ADH4, FMO2,CYP11A1, CYP2C9, ACSS1,CYP…
REACTOME_LATENT_INFECTION_OF_HOMO_SAPIENS_WITH_MYCOBACTERIUM_TUBERCULOSIS	-0.518563	-1.94329	0	0.0065797	33	30	NOS2, TCIRG1, SLC11A1, NOS3, NCF4, NCF2, CYBA, LTF, CYBB,ATP6V0A2,ATP6V1G1, NOS1,ATP6V1G2,ATP6V1B2,ATP6V0E1,ATP6V1E2, ATP6V0C,ATP6V1G3,ATP6V1B1,ATP6V0D2,ATP6V0A4, ATP6V1F,ATP6V1C1,ATP6V1C2, ATP6V0B,ATP6V1E1, ATP6V1D,ATP6V0D1, ATP6V1H, ATP6V1A
KEGG_HISTIDINE_METABOLISM	-0.530168	-1.94364	0	0.0066401	29	27	HDC,ALDH3B1, LCMT1, METTL6, LCMT2, HNMT, FTCD, HAL,METTL2B,ALDH1A3, DDC, MAOB,WBSCR22, HEMK1, ACY3, CNDP1,ALDH1B1, AMDHD1, TRMT11, ALDH2,ALDH3A1,ALDH7A1,ALDH3B2,ALDH3A2, ASPA,ALDH9A1, MAOA
LEI_MYB_TARGETS	0.432951	1.90173	0	0.006657	318	304	KRT81, KRT17, PTHLH, COL17A1, KRT15, LPCAT1, CCND1, AHNAK2, EFNA3, LAMA3, SFN, ANXA2P1, HSPA6, GJA1, SLC16A3, VIM, MCM7, TMEM47, ANP32B, MDK, APEX1, PLK2, KRT19, MMP15, HNRNPA1, TPM1, FAP, GM2A, CAV1, TFAP2A, NNMT, ISG20, UBC, LGALS3BP, SEMA3F, PLEC, CRABP2, ANXA1, PTTG1IP, TGFBI, LASP1, SPARC, ITPR3, SERBP1, AXL, PRSS23, VPS72, SLC7A5, TM4SF1, SH2B3, DAXX, KRT7, CLEC11A, RPS6KB1, IGFBP7, SLC2A3,…
NAKAYAMA_SOFT_TISSUE_TUMORS_PCA1_UP	0.511506	1.89854	0	0.0066571	76	72	HSPA6, GPNMB, IL4R, FAP, NNMT, ISG20, EFEMP1, WISP2, IFI44L, CD44, TIMP1,ARHGAP15, ITGBL1, LILRB1, TNFAIP6, APOL1, THBS2, CCL5, CD52, SLC15A3, S100A6, ECM1, CCL13, S100A4, C3, LY96, C1QA, ITGAM, C1QB, FHL2, FCGR2B,SERPINE1, NCKAP1L, LYZ, SLAMF8, NCF4, SIGLEC1, FCGR2C, MS4A4A, CXCL9, DOCK2, CFB, PLTP, CD163, CFH, GZMA, SLA, MRC1, CD14, VSIG4, CSF1R,HLA-DPA1,HLA-DQB1, BIN2, HLA-DRA, GZMK, AIF1, CXC…
CHIANG_LIVER_CANCER_SUBCLASS_CTNNB1_UP	-0.37798	-1.94037	0	0.0066719	176	152	UBXN10, INSIG2, PANX1, PDK1, TRIB2, FGF13, VLDLR, TMEM100, EBPL, SEPT4, SLC16A1,LINC00176, DPP4, IRS1, SPARCL1, HLF, CDK6, FAS, KCNJ8, SGK223, CTNNBL1, ABCG2, PTPRG, TTC9, DYNC1I1, ACSL5, YPEL1, C1orf112, HHAT, PHLPP1, CD36, TPRG1, SPRYD7, ECM2, ASAP2, THBS4, SDPR, SNAI2, MAP3K8, IRX3, BIK, CRLS1, AQP9, TSPAN5, BOK, SLC1A2, PRR5L, RBP1, HTR2B, KCNK1, LGR5, REG1A, CORIN, EXPH5, GSTM2, GNAI1, CYP8B…
BROWNE_INTERFERON_RESPONSIVE_GENES	0.521173	1.89868	0.0012821	0.0066851	68	67	IDO1, PML, TRIM21, TREX1, BST2, CYTH1, ISG20, GBP2, IFI44, IFI44L, TRIM22, CASP1, MELK, TYMP, SP100, IFI6, ISG15, IFIT5, IL15RA, TAP1,APOBEC3G, PSMB8, HLA-F, UBE2L6, IRF7, OAS2, MYD88, MX1, IFI27, XAF1, RSAD2, BAZ1A, OASL, NMI, RBCK1, SP110, SAMHD1, PSMB9, STX11, PLSCR1, TLR3, MX2, TRIM14, KIF5C, LMO2, IFIT3, CXCL11, TDRD7, OAS1, IFI35, GBP1, CXCL10, IFIT2, GMPR, RGL1, CCL8, EIF2AK2,RABGAP1L, TNF…
GILDEA_METASTASIS	0.625614	1.89934	0.0014535	0.006697	30	28	PRKCDBP,ARHGDIB, BST2, COL5A2, KRT19, MPZL2, SPARC, KRT7, FN1, DUSP4, IFI16, VAMP5, IGFBP5, MYL9, TAGLN, IFI27, GLIPR1, RAC2,TACSTD2, SRGN, TIMP3, PTX3,SLC2A10, IGFBP4, GBP1, HNMT,SMARCA4, AKR1C3
PLASARI_TGFB1_SIGNALING_VIA_NFIC_10HR_DN	0.612691	1.89948	0	0.006709	30	28	STC2, ACAN, MCF2L, RPL39L, CELF2, HEY1, NNMT, FLI1, WISP2, AHR, SLC37A2, LYL1, PTPN18, SIRPB1, DOCK2,C16orf54, MAFB, RBP1, PHIP, RAB3IL1, MFAP4, NR4A2, ALDH1A3, FAM111A, PDGFRA, INSIG1, FAM105A, LSS
MAGRANGEAS_MULTIPLE_MYELOMA_IGLL_VS_IGLK_DN	0.642745	1.90005	0.0014837	0.0067222	24	22	CDSN,ANKS1A, RPL4, MXI1, PRKD2,CTNNB1, AXL, RHOG,GAS2L1, SCN1B, DUSP1, LTBP4, LTA, CD46,PNPLA6, ALG8, CKAP2, PBX1,ZNF331, HYAL1, RBL2, GAS2
NABA_COLLAGENS	0.569834	1.89974	0	0.0067266	44	40	COL21A1, COL5A3,COL17A1,COL23A1, COL8A2,COL11A1, COL5A2, COL4A1, COL4A2, COL8A1, COL6A2, COL5A1, COL1A2, COL1A1, COL6A1,COL15A1,COL13A1,COL18A1, COL3A1, COL7A1, COL6A3,COL25A1,COL10A1, COL9A1,COL11A2,COL16A1,COL27A1,COL12A1,COL14A1,COL26A1,COL22A1, COL9A3, COL9A2, COL4A5,COL19A1,COL24A1, COL4A6,COL28A1, COL4A4, COL4A3
AIGNER_ZEB1_TARGETS	0.58351	1.90065	0	0.0067456	35	33	SYTL1, SFN, PKP3, PMEPA1, MPZL2, DSC2, CDH3, CD24, GJB3, MUC1, SCEL, CXADR, EPPK1, CLDN7, CDH4, CDH11, DMKN, TACSTD2, PPL, TSPAN15, DSP, TMEM30B, CDH1, F11R, SHROOM3, MAL2, PCDH7, EPCAM, GJB2, CRB3, SH3YL1,MARVELD2, TSPAN1
KEGG_DNA_REPLICATION	0.587362	1.89671	0	0.0068236	36	35	RFC2, LIG1, POLE3, MCM7, RPA1, MCM5,RNASEH2A, RFC5, MCM2, POLE2, RFC4, MCM6, POLE4, PRIM1, FEN1, POLA1, PRIM2, POLD1, POLE, RPA2, MCM3, SSBP1, PCNA, RFC3, POLA2, MCM4, POLD4, POLD3,RNASEH2C,RNASEH2B, POLD2, RFC1, DNA2, RPA3, RNASEH1
KAYO_CALORIE_RESTRICTION_MUSCLE_UP	0.494648	1.89549	0	0.0068649	95	88	ATP2B2, CCNI, HSPA6, RNF113A, CPA3, RASSF2, FAP, CYB5R3, TUBA1A, HSPG2, FN1, DHX38, COL1A2, COL1A1, PHKG1, FLNA, CALB2, HCLS1, ENG, CNN3, GDI1, GNL1, FAS, COL3A1, STX4, MYH9, EMP3, ZNF211, BCL6, LRP1, ACTR1B, CCL13, S100A11, S100A4, RYK, COL6A3, MTMR11, ITGB8, C1QB, CKAP4, VAT1, SAFB, ACTB, APP, FABP5, CCR5, SPTAN1, CLEC3B, UPP1, TOB1, ARCN1, TGFBR2, KLRK1, AP2S1, LIMK1, SOX15, IGFBP4, KL, CD302,…
REN_ALVEOLAR_RHABDOMYOSARCOMA_DN	0.426376	1.89073	0	0.0072264	408	399	CCND1, GPR176, NGF, PLSCR3, LOXL2, P4HA1, TGFB1I1, QSOX1, TGFB1, IGFBP3, COL8A2, TMEM45A, LAMA4, NPDC1, SFXN3, COPZ2, FXYD5, EFEMP2, GJA1, TMEM43, FKBP10, GNAI2, ANXA2, PAM, CASP4, COL5A2, CAV2, BMP1, CD248, PRAF2, PRDX4, TMEM184B, FAP, PLOD1, COL8A1, FEZ1, TAPBP, ASAP1, CD81, CAV1, DUSP14, DOK1, NNMT, LBH, ITGA5, EFEMP1, PTRF, GSN, LGALS3BP, TAGLN2, VKORC1, P4HB, ANXA1, TGFBI, EPAS1, COL6A2, RHB…
MIKKELSEN_IPS_ICP_WITH_H3K4ME3_AND_H327ME3	0.483971	1.88808	0	0.0073498	126	95	LECT1, TGM1, YPEL4, NOL3, FOXS1, PTPRR, LAMA4, FXYD5, CLEC14A, CACNB3, KCNAB1, MST1R, TRIM46, TGFB3, CRABP2, GUCY1A3, ALOX15B, CD44, CHST3, CDKN2C, PAMR1, TPPP3, OSBPL5, KCNJ2, LOXL3, ABCC3, LYL1, PRSS36, PCDHGA1, SLFN5, RHOJ, CNN1, COL7A1, TEKT2, ROBO2, EDN2, DKK1, ADARB2, VAV1, ISLR, SOX17, GPR84, MEGF10, ISLR2, CXCL1, ZNF521, KCNJ5, KCND2, TLR5, MEIS1, PTGS1, TMEM125, HOXB13, SLC2A10, LTA, PDZ…
HOFMANN_MYELODYSPLASTIC_SYNDROM_LOW_RISK_UP	0.661475	1.88961	0.0074963	0.0073557	22	20	LEFTY1, CCL18,IL1RAP, RUNX1, MSX1, DLEC1, COIL, TRAF6, MEOX1,CDKN1A, GNA15,ZNF136, PTPRS, DNM2, ATF3, PTPN7, LTK, PRKCB, ZMYM3, TOB2
JUBAN_TARGETS_OF_SPI1_AND_FLI1_DN	0.497842	1.88863	0	0.0073632	92	85	DAPK2, TGFB1, JAG2, SEPT9, IMPDH2, TPI1, RPL18, HRC, PLD2, EIF4B, LDHA, POLR1D, PTGIR, MBD2, TRIAP1, IGF2, TUBB, KCNN4,FAM103A1,PPP1R14B, SNRPB, CARD11, CCNB1, PUS7, MIF, RCC2, NASP, PHLDA2, ARPC2, ASB2, NFYA, ZNF841, MYC, NHP2,TNFRSF1B, SYNCRIP, TOMM7, RNASE6, CA5B, AHDC1, FADS2, S1PR2, NOLC1, HIF3A, CHD1, EIF3C, ZFP36L2, NIP7, TRAPPC5, FOXP4, ZNF777, FYTTD1, CCL3, SMARCC1, FAM162A, HNRNPL, NFAT…
PID_HIF1_TFPATHWAY	0.51681	1.88821	0	0.0073643	66	64	CA9, EGLN3, HK2, SLC2A1, VEGFA, CP, NOS2, EDN1, NPM1, BHLHE41, ETS1, ADM, NDRG1, CXCR4, LDHA, PGK1, EPO, ITGB2, ALDOA, ENG, AKT1, HDAC7, ENO1, ABCG2, BHLHE40, SP1, BNIP3, EGLN1, CREB1, PGM1, SMAD4,SERPINE1, NT5E, TF, MCL1, HK1, JUN, PFKL, CREBBP, ID2, RORA, GCK, IGFBP1, FURIN, EP300, FOS, ARNT, TFRC, HMOX1, TFF3, PLIN2, TERT, CITED2, PFKFB3, COPS5, HNF4A, SMAD3, NCOA1, GATA2, HIF1A, NCOA2, CXCL12…
KEGG_ARRHYTHMOGENIC_RIGHT_VENTRICULAR_CARDIOMYOPATHY_ARVC	0.523364	1.88905	0	0.0073886	76	63	CACNB1, GJA1, CACNB3, CACNA1F, CACNA1C, DMD, ITGB4, ITGA4, SGCA, ITGB1, ITGA5, ITGA7, TCF7L1, LMNA, CTNNB1, DSC2, CACNA1D, ITGA3, ITGA10, ACTN1, TCF7, TCF7L2, ITGA1, LEF1, ATP2A2,CACNA2D4, ITGB5, CACNG4, DSG2, SGCB, ITGB8, ACTN4, ITGA2, ACTG1, ACTB, EMD, ITGA6, ITGA8, ITGA9, CTNNA1, DSP, ITGA11, CACNB2, DES, SGCD, ITGB6, ITGB3, DAG1, RYR2, JUP, PKP2, LAMA2,CACNA2D1, ITGB7, ITGA2B, SLC8A1, ITGAV, …
BURTON_ADIPOGENESIS_7	0.546384	1.88747	0.0013477	0.007408	51	48	CD47, CCND1, TMEM45A, APBB2, PLP2, NONO, TAGLN2, WISP2, TGFBI, CD44, PRRX2, TIMP1, IFITM3,MARCKSL1, TIMP2, RNASE4, SYNPO, RHOJ, VAMP5, S100A6, FBN1, S100A4, PLXNB2, SLC6A8, CPE, TPM4, PBX3, FBLN2, BAG6, CTTN, S1PR3, HMGA2, PLAC8, SLC29A1, THY1, TINAGL1, PTGS1, PROS1, XPO1, UBQLN2, RBP1, IL6ST,SERPINE2, DNM1, H2AFV, NQO1, VCAM1, PNP
KEGG_CYTOKINE_CYTOKINE_RECEPTOR_INTERACTION	0.451678	1.88653	0	0.0074398	267	196	CCL18, TNFRSF4,TNFRSF10C, EDA2R, VEGFA, CD40, IL1RAP, TGFB1, INHBB, CCR10, IL3RA, IL4R, ACVRL1, CXCL5, IFNAR2, TNFSF12, TGFB2, CXCR4, CXCL16, NGFR, TNFSF11, FLT1, TGFB3, FLT4, IFNGR2,TNFRSF10D, OSMR, PDGFRB,TNFRSF10B, IL21R, VEGFC, PDGFA,TNFRSF11A, EPO, IL10RB, RELT, KDR, BMP2, INHBA, CX3CL1, IL1R2, EDA, CCL20, PDGFC, PLEKHO2, CSF2RB, MET, IL17RA, PF4V1, IL2RB, IL15RA, EGFR, FAS, CCL5, PDGFB, TNF…
WINTER_HYPOXIA_METAGENE	0.445766	1.88591	0	0.0074405	242	224	CA9, TGFA, COL5A3, PGF, HK2, PFKFB4, STC2, SLC2A1, P4HA1, VEGFA, QSOX1, CP, TGFB1, IGFBP3, NOS2, EDN1, ANGPTL4, BHLHE41, ALDOC, VIM, MXI1, ANGPT2, ANXA2, COL5A2, ETS1, KRT19, TPI1, ADM, NDRG1, CXCR4, GAPDH, TP53, FLT1, ITGA5, LGALS1, GPRC5A, TGFB3, RELA, ANXA1, TGFBI, SLC16A1, COL5A1, LDHA, DDIT4, PLAUR, TPBG, PGK1, ADORA2B, IGF2, SLC2A3, VEGFC, FN1, CTSD, EPO, RBPJ, NR3C1, BATF3, KDR, LOX, MUC1,…
PID_ALK1_PATHWAY	0.620146	1.88496	0.0014793	0.0075282	26	24	TGFB1,ACVRL1, CAV1, TGFB3,FKBP1A, MAPK3, INHBA, ENG, ARRB2, BMPR2,ACVR2B, SMAD4,CSNK2B,TGFBR2, SMAD7, SMAD1,TGFBR1, ID1, SMAD5, SMAD9,ACVR2A, ACVR1,PPP1CA, MAPK1
GROSS_HYPOXIA_VIA_ELK3_AND_HIF1A_DN	0.482856	1.88406	0	0.007559	103	98	LPCAT1, AMD1, CCND1, CD276, NRARP, TRIM21, BCL6B, DUSP7, COL4A2, FRZB,LGALS3BP, PMP22, PLEC, IFNGR2, APLN, AGRN, H6PD, ARL4C, UBE2C, SETD7, PLXNA1, ETS2, TOPBP1, SIGMAR1, NOTCH1, CACNA1H, CDS2, EXO1, AKAP8, FAS, PYCR2, CCNB1, F2R, RRM2, RCC2, MYH9, LSM2, CAMKK2, MOGS, CDK2AP1, MAP3K11, CASP3, ELOVL1, MGAT2, TNS1, NSL1, SKIL, DIDO1, RXRA, SSH1, IL1R1, ZMAT3, PRPF19, CPD, TBC1D1, FRRS1, SRSF5,TMEM1…
PID_FRA_PATHWAY	0.582762	1.8836	0.0014144	0.0075794	37	35	CDKN2A, CCND1, LAMA3, GJA1, MMP9, ITGB4, PLAUR,COL1A2, MGP,NFATC1, CCNA2, ATF4, SP1, MMP2, NOS3, FOSL1,NFATC2, THBD, JUN, TXLNG, LIF, JUNB, JUND, USF2, EP300, HMOX1, IL6,NFATC3, DMTF1, MMP1, BGLAP, FOSL2, CCL2, DCN, PLAU
WANG_IMMORTALIZED_BY_HOXA9_AND_MEIS1_DN	0.641899	1.88258	0.0028902	0.0076046	24	23	CALCRL, EDNRA, EBF1, NRGN, ERG, CD34, TMSB10, CD93, LY86, GEM, IL7R, CD27,PTPRCAP, CD244,TSC22D1, ZBTB16, MEIS1, SATB1, FLT3, OAF, NRIP1, ITGB7, CXXC5
BURTON_ADIPOGENESIS_8	0.499756	1.88292	0	0.0076097	86	81	SLC1A4, LAMB2, CD276, FLNB, SKI, FXYD5, PLA2G7, CMTM3, PRAF2, PRDX4, TAPBP, GNB1, KCTD10, TUBA1A, BAX, RAB31, TPBG, TMSB10, PRSS23, SLC7A5, GNG10, BDNF, PLD3, TNFAIP1, NSA2, LOX, PDLIM7, ANXA5, ACTA2, MSN, TES,SERPINB6, CD99, F2R, EMP1, MYH9, EMP3, CAP1, PLXNB2, SERTAD1,MAPKAPK2, RPS6KA4, USP22, ANXA3, APP, PLTP, DSTN, SPTAN1,SERPINF1, TIMP3, PTGIS, ZFP36L2, GBA, SUMF1, VCL, GSTM2, PDPN, CAPG, FG…
LEE_EARLY_T_LYMPHOCYTE_UP	0.481462	1.88104	0	0.0077544	107	97	SLC1A4, TUBB4B, DTL, UHRF1, FAIM, NLGN4X, TSHR, RAPGEF5, PRC1, TYMS, FANCI, UBE2C,KIAA0101, MCM10, MCM2, TUBB, NCAPG, MELK, MYB, KIF20A, CCNB2, GALNT7, NDC80, ADA, MKI67, PTTG1, E2F2, ATAD2, TTK, CCNB1, CD99, KIF18B, CD1A, DLGAP5, CEP55, RRM2, TOP2A, ASPM, PBK, AEBP1, BIRC5, NUF2, E2F7, DSCC1, KIF15, BUB1, NEK2, GNA15, CENPW, E2F8, NUSAP1, KIF2C, CEP128, PRR11, CENPA, OIP5, DIAPH3, BUB1B,RAD51AP1…
ZHOU_CELL_CYCLE_GENES_IN_IR_RESPONSE_24HR	0.468699	1.88013	0	0.0077777	128	121	E2F1, MCM7, ANLN, UHRF1, FAM198B, TDP1, NCAPH2, CDK2, MYBL2, CENPK, PRC1, RFC5, FAM64A, KIFC1, UBE2C, MCM2, HAUS8, TOPBP1, LXN, MELK, DNAJC9, KIF20A, CCNB2, PTTG1, RFC4, GINS3, EXO1, TTK, DEPDC1, CCNB1, CENPF, DLGAP5, CEP55, CCNA2, HMGB2, TOP2A, ASPM, TRIP13, NASP, SQRDL, RANBP1, CDCA8, EXOSC8, BIRC5, USP1, NUF2, SMPD4, EZH2, BUB1, NEK2, SULF2, E2F8, LMNB1, MAD2L1, ODF2, NUSAP1, BORA, CENPA, RAD5…
SATO_SILENCED_EPIGENETICALLY_IN_PANCREATIC_CANCER	0.556172	1.88043	0.001355	0.0077785	49	40	DAPK2, KRT17, CDKN2A, CRIP1, SGCE, LHX2, BST2, WISP2, TP53I11, CCNA1, ITM2C, EZR, CLDN7, CRLF1, BNIP3, SRGN,CDC42EP2, BIK, AURKC, STAT3, F11R, NLRP2, IL32, TERT, ARC, S100A2, CSF3, S100P, TKTL1, PAX6, FGF2, CDC25A, HSPA1A, MLH1, GAS1, WT1-AS, UCHL1, SALL1, LIPC, SFRP1
MARCHINI_TRABECTEDIN_RESISTANCE_DN	0.551995	1.87944	0.0014124	0.007831	49	46	NOTCH3,SLC16A3, CDH13, ADM, COL4A2, TPM1, IMPDH1,PTTG1IP, SLC7A5, IGFBP7, FSTL1, NID1, PSMF1, EIF4A1, ACTA2, COL3A1, PKN1, DLC1, CBLB, RND3,BHLHE40,HSP90B1, HLA-B, SIRPA, PLXNB2, GPI, LOXL1, CALR, ACTG1, CAD, PYCR1, RUSC2, BCAM, PRNP, ANKRD1, HSPA5, CITED2, SLC1A5, SLC3A2, HDLBP, AKT2, MARCH8,CSNK2A1, MYH8, MARS, ACTN2
LI_AMPLIFIED_IN_LUNG_CANCER	0.455371	1.87894	0	0.0078397	178	167	MALL, VEGFA, IGFBP3, DDOST, SFN, COL11A1, FSCN1, RPL10A, RPL23A, PLP2, RPL38, PFKP, DPP7, NACA, MDK, SYN1, RPL30, UBE2I, PRDX4, RPL17, RPL27A, RPS4X, ENC1, PABPC1, CHIT1, PTPRF, RPL37,LGALS3BP, RPL31, RPS2, RPL28, CRABP2, RPL37A, P4HB, RPL13, LDHA, SLC7A5, BGN, TIMP1, TRIM28, KRT7, UBE2C, RPS20, COL1A2, RPL8, COL1A1, RPL7, RPL35, RPS5, RPS16, KDELR1, SUMO2, MUC1, ALDOA, ABCC3, RPS10, SPINT1, THBS…
WEINMANN_ADAPTATION_TO_HYPOXIA_UP	0.601581	1.87778	0.0014493	0.007925	29	28	NMU, GPR37,SLC16A3, DMD, TPM1, NNMT, TPBG, IGFBP7, MARCKS,COL15A1, COL3A1, ID3, CRLF1, ANP32A, HMOX1, GSTA4, KCNK1, CALM1, MEST, MAP2K6, HSPA1B, HSPA2, BAG1, LPL, NQO1, CADM1, GPX3,ALDH3A1
MARTORIATI_MDM4_TARGETS_NEUROEPITHELIUM_UP	0.454693	1.8778	0	0.0079558	176	161	PRELID2, PVT1, EGLN3, HK2, CTHRC1, CCND1,EPB41L4A-AS1, PTP4A3, SLC2A1, ANKRD37, P4HA1, VEGFA, CPNE2, PHLDA3, PFKP, PLK2, KRT19, TPI1, HNRNPA1, AEN, RPS19, ADM, CD81, TP53, ANO3, BAX, LDHA, RPL36, DDIT4, CPT1C, PGK1, SNHG6, ZAK, ZNF365, SLC2A3, EXOC4, CCND2, PTK7, ACTN1, GGTA1P, PERP, ALDOA, ERCC5, TRIM27, ENG, CDK6, HIGD1A, VCAN, TAP1, GTSE1, SNAI1, IGDCC4, NAV1, SYNM, RNF126, SHFM1, FOXO3, BHLHE…
BHATTACHARYA_EMBRYONIC_STEM_CELL	0.494097	1.8748	0	0.0081316	89	83	LEFTY1, POU5F1, RPL4, SFRP2, GJA1, NPM1, RPS24, RPL6, DTL, KIF4A, IMPDH2,SERPINH1, RSL24D1, TNNT1, CRABP2, TUBB6, SLC16A1, RPL24, GNL3, RPLP0, IFITM1, RPL7, TUBB, BRIX1, CALU, EIF4A1, PTTG1, AURKB, TPX2, CCNB1, RCC2, HMGB2, NASP, SET, SEMA6A, DSG2, MTHFD2, ACTC1, NME2, DNTTIP1, SNRPF, PSIP1, KRT8, CCT8, KRT18, HDAC2, FAM83D, FABP5, TK1, MAD2L2, ZNF43, ZNF257, EPRS, ARL5B, DDX21, CDK1, IGF2BP2, HN…
KEGG_PANCREATIC_CANCER	0.5128	1.8735	0	0.0082063	70	69	TGFA, CDKN2A, PGF, CCND1, VEGFA, TGFB1, E2F1, TGFB2, TP53, RAD51, TGFB3, RELA, RALGDS, MAPK3,ARHGEF6, VEGFC, RB1, PIK3R5, CDK6, E2F2, RAC1, AKT1, EGFR, PIK3R3, BRCA2, PIK3CD, PIK3CB, VEGFB, RALA, SMAD2, JAK1, RAC2, SMAD4, CDK4, MAP2K1, AKT3, CDC42, IKBKG, TGFBR2, STAT3, BCL2L1, TGFBR1, PIK3CG, BAD, RALB, PIK3CA, ERBB2, PLD1, PIK3R2, E2F3, RAC3, NFKB1, MAPK9, KRAS, MAPK1, IKBKB, SMAD3, ARAF, STAT1…
VANTVEER_BREAST_CANCER_ESR1_DN	0.439442	1.87252	0	0.0082564	240	223	CA9, NMB, FABP7, CCL18, AMD1, ADAMTS7, MALL, IDO1, PKP1, TMEM45A, FSCN1, DYSF, KRT23, TTYH1, SLC43A3, RNF145, ANLN, MID1, PFKP, IFNAR2, ADM, NDRG1, MCM5, HAPLN3, GAPDH, PLEKHG1, LGALSL, MYBL2, UBE2J1, TMSB10, SERBP1, DSC2, CD180, TM4SF1, FAM64A, KRT7, PROM1, LMO4, CHST2, FZD9, TMEM123, NCK1, GABRP, CDH3, QSOX2, TRIM29, BLM, RSU1, TOPBP1, BCL11A, MELK, KCNN4, ITGB2, RRP1, CCNB2, JRKL, CX3CL1, MAPR…
PEDERSEN_TARGETS_OF_611CTF_ISOFORM_OF_ERBB2	0.493589	1.87153	0.0013441	0.0083108	76	71	TGFA,FLJ23867, HK2, LOXL2, ANGPTL4, ENC1, ITGB1, ISG20, ITGA5, PTRF, LHFP, PLAUR, IDS, CD44, DSC2, EDEM1, ACTN1, PLOD2, IL1R2, COL13A1, MET, EGFR, ADAM9, FAM131B, WWTR1, MGLL, SH2D3A, TNFAIP8, ZNF185, TMEM156, BCL2A1, NT5E, B3GNT5, FSTL3, STC1, HSPB8, TFPI, SLC4A7, PARM1, UBE2E3, SRCAP, ITGB6, LMO7, IGF2BP2, TSC22D2, MMP1, S100A2, LYST, F2RL1, NPY1R, CD59, HOMER3, C3orf52, IL11, PTGES, EPHA1, DNM…
ZHU_CMV_ALL_DN	0.469703	1.87045	0	0.0083789	128	122	CCND1, LAMB2, IGFBP3, LAMA4, FKBP10, MATK, COL5A2, RUNX1, FAM46A, ADM, TPM1, CHN1, PABPC1, TFAP2A, EFEMP1, ANXA1, COL6A2, RALGDS, LMNA, LAMC1, DDIT4, IGF2, AHR, COL1A2, EPO, COL1A1, NR3C1, FLNA, LOX, MARCKS, ERCC5, ENG, TPM2, TCF7L2, COL15A1, ACTA2, THBS2, VCAN,SERPINB6, COL3A1, CD151, WEE1, MYH9, IGFBP5, TAGLN, TSPAN4,TNFRSF1A, MYLK, POSTN, CDH11, BCL2, RAB13, TPM4, TRAM2,SERPINE1, ACTG1, IGF1R,…
PID_P53_DOWNSTREAM_PATHWAY	0.461794	1.86958	0	0.0084323	137	131	TGFA, DDB2,TNFRSF10C, IGFBP3, FDXR, SFN, PML, E2F1, PRDM1, NDRG1, CAV1, TP53, BBC3, MAP4K4,TNFRSF10D, BAX, PTEN, DDIT4, PLK3, BDKRB2,TNFRSF10B, TRIAP1, CASP1, PYCARD, CTSD, BID, PERP, RB1, CX3CL1, MET, E2F2, COL18A1, HIC1, VCAN, TAP1, RPS27L, EGFR, FAS, CCNB1, MDM2,TNFRSF10A, BCL6, CCNK, PRMT1, NFYA, SP1, BNIP3L, MMP2, ARID3A, SESN1, CDKN1A, EDN2, BCL2, SERPINE1, EPHA2, MSH2, BCL2A1, DKK1, TSC2, …
WANG_METHYLATED_IN_BREAST_CANCER	0.584014	1.86779	0	0.0085142	35	34	KRT17, IRS2, CAV1, PTRF, SLC7A5,TNFRSF10B, TUBB, GJB3, FYN, INHBA, SERPINB8, ZYX, MYO1B, PTPRG, SPHK1, ETV5, FOSL1, KLF6, EPHA2, DKK1, DUSP1, MAFF, UPP1, CTNNA1, SMURF2, STK17A, F3, HBEGF, THBS1, SLC9A1, SLC3A2, CDC25A, GDF15, GADD45A
HAMAI_APOPTOSIS_VIA_TRAIL_DN	0.452175	1.86603	0	0.0085215	186	155	KISS1R, NMB, NOL3, FOXS1, NLE1, TMEM45A, ANGPTL4, FXYD5, HEYL, ALDOC, FHOD1, IL4R, MDK, SERPINH1, FOXF2, PLEKHH3, IMPDH1, SH3D21, S100A3, PTPRF, TRIM46, TNNT1, TAGLN2, CCDC85B, SEZ6L2, SHC1, MTA1, PCDHB2, PLAUR, ARAP3, OSCAR, SMARCD2, KCNA5, INF2, FZD9, IFITM2, BATF3, ADA, GFOD1, COL6A1, TYMP, BEGAIN, ISG15, EFNA1, VASP, SNAPC2, DDAH2, LIMD2, SH3BP1, EPS8L1, SLC15A3, TRIM16, PPP1R14A, PHLDA2, FOX…
REACTOME_G_ALPHA_S_SIGNALLING_EVENTS	0.495552	1.86709	0	0.0085336	121	82	HTR6, PTHLH, PDE4C, PDE1B, ADCY3, CALCRL, RAMP2, GNAI2, ADCY8, ADM, GNB1, TSHR, PTGIR, GNG10,ADORA2B, ADCY7, GNG11, GNB4, GNAI3,ADORA2A, GNG2, GNGT1, ADCY4, PDE3A, ADCY5, RAMP3, MC1R, GNB2, GLP1R, PDE8B, PTGDR, PDE10A, P2RY11, GNAS, VIPR1, RXFP1, VIP, PDE4B, GNB3, ADCY6, HTR7,ADCYAP1, GNGT2, PDE8A, PDE7A, PDE2A, GIPR, ADCY1, ADCY2, PTGER2, PDE4D, RAMP1, GNAI1, GNG5, GNG12, POMC, PTH1R, HRH2, RLN2…
GROSS_HYPOXIA_VIA_ELK3_UP	0.441473	1.8679	0	0.0085418	209	197	LPCAT1, AMD1, CCND1, CD276, TUBB4B, NRARP, SKI, ULK1, TRIM21, BCL6B, PPM1F, DUSP7, RAMP2, PHLDA3, DPP7, CAV2, EFNA5, NAP1L1, COL4A2, CD81, FRZB, LGALS3BP, PMP22, PLEC, ROBO4, PRKCH, IFNGR2, APLN, H6PD, AXL, PIAS3, ARL4C, KANK2, CDKN2C, UBE2C, SETD7, CRIP2, PLXNA1, MYO1C, FAM89B, TUBA1B, TOPBP1, TIMP2, MARCKS, KIF20A, CCNB2, RBM3, SERINC3, NDC80, ENG, SIGMAR1, NOTCH1, KDSR, EXO1, AKAP8, FAS, PYCR2…
HONRADO_BREAST_CANCER_BRCA1_VS_BRCA2	0.677037	1.86622	0	0.0085533	18	18	CDKN2A, CCND1, VIM, TP53, MKI67, EGFR, CCNB1, MDM2, CCNA2, TOP2A, BIRC5, BCL2, KRT8, KRT5, SKP2, PGR, CCNE1, RAD50
GAURNIER_PSMD4_TARGETS	0.521071	1.86638	0	0.0085714	73	65	HLA-G, CCL18, TGFB1, CCR10, CXCL16, IL21R, HLA-E, IL1R2, CCL20, IL17RA,HLA-DQB2, CCL5, HLA-F,HLA-DPB2, IL12RB1, HLA-H, HLA-A, CCR7, CXCL3, CCL13, HLA-B, IL16, C3, B2M, CD86, IFNGR1, NFKB2, RELB,HLA-DPB1, CXCL6, C5AR1, C3AR1, CXCL9, TNF, HLA-C, CCR5, CXCL1, CXCL2, C2, IL13RA1,HLA-DPA1, CXCL11,HLA-DQB1, CXCL13, HLA-DRA, TGFBR1, CCL19, CCL3, CXCL10,HLA-DQA1, IL10, IL6, IL2RG, CCR1,HLA-DRB1,HLA-DRB5,…
REACTOME_SYNTHESIS_OF_PIPS_AT_THE_GOLGI_MEMBRANE	-0.622609	-1.91174	0	0.0085783	17	16	ARF1, ARF3, FIG4, PI4KB, PIK3C3, INPP5E, PIK3R4,PIK3C2A, PI4KA,PIK3C2G, PI4K2B, OCRL,PIKFYVE, VAC14, SACM1L, PI4K2A
ELVIDGE_HYPOXIA_BY_DMOG_DN	-0.445416	-1.91334	0	0.0086226	59	56	CCND3, SLC24A3, SLC35C1, PIK3R3, SRM, SPDEF, GABBR2, SLCO3A1, ATP2A3, CORO1A, TAF9B, SLC29A1, URB2, PUS1, RPP25, SOBP, NUP98, CALM1, RET, SRSF1, ACOT7, CEBPA,C14orf169, GPATCH2, ATP6V0A2, SDF2L1, ADORA1, ZGPAT, ESR1, GDPD3, POLR3K, SOCS2, TOR3A, RPP40, DOLK, SPAG1, NDUFS6, AOX1, CENPN, JAK2, NAPA, PYCRL, ODC1, CXCL12, SLC25A44, SLC5A6, ADAT1, IDH3A, PSME3, ALDH4A1, LPCAT3, IDE, HSPA4, WDR77, PDZK…
SHEN_SMARCA2_TARGETS_UP	-0.333633	-1.91457	0	0.0086284	424	415	CAMSAP1, INSIG2, TMED10, RBM22, RPA1, BTBD3, CNBP, IDS, NPEPPS, COPS2, ARHGAP29, RAB4A, RBPJ, ATXN1, CEP57, DPF2, NAB1, PSMF1, CAST, CUL4B, SERINC3, RB1, KIAA0355, PCNP, UBL3, EID1, CBX1, LIMCH1, DEK, LSM14A, SP3, PPWD1, FTO, SMAD2, USP1, ERCC3, CRYZL1, NSFL1C, PPP2R5C, FEM1C, RYK, PON2, MRFAP1L1, MED4, ROCK1, TOR1AIP1, MFSD6, FEM1B, RBM34, SMAD4, MKL2, RIOK3, MAP4K5, CCDC90B, CDKN1B, GNAQ, CREG1…
HOSHIDA_LIVER_CANCER_SURVIVAL_UP	0.502788	1.86321	0	0.008761	73	70	ELOVL2, CTNND2, LOXL2, TGFB1I1, SLC7A1, NOS2, CPA3, COL4A1, CHSY1, TCF4, CXCR4, ANXA1, SLIT3, KRT7, AKAP13, RNASE1, EMP2, SP100, DDR1,SERPINB8, ICK, FILIP1L, LPAR2, TEAD4, TNK2, IQGAP1, AEBP1, MMP7, NCAPH, FBN1, COL6A3, BCL2, NFKB2, CHERP, RBM34, PSMB9, SLC12A2, HDAC9, CD48, WIPF1, ANXA3, HMG20B, ITGA9, COL16A1, IGFBP6, TRIO, NOL7, CCDC6, ACTR2, GBA, IER3, CCL19, NTS, LPP, CCL21, DUSP5, TSC22D2, …
DEMAGALHAES_AGING_UP	0.52844	1.86214	0.0013587	0.0088059	55	53	HLA-G, LGALS3, GPNMB, TMED10, NDRG1, EFEMP1, GBP2, PCSK6, RASA3, VWF, ANXA5, CLU, MSN, LAPTM5, S100A6, GFAP, DERL1, S100A4, C3, FCGR2A, C1QA, B2M, C1QC, C1QB,SERPING1, DCLK1, RNF213, FCGR2B, LYZ, IL33, ADARB2, CTSS, VAT1, HCST, ANXA3, PTGES3, HBA1, MPEG1, C4A, SGK1,HIST1H1C, TXNIP, GSTA1, APOD, CLIC4, ADIPOR2, MT1F, NPC2, LITAF, SPP1, MGST1, PSMD11, GNS
SOTIRIOU_BREAST_CANCER_GRADE_1_VS_3_UP	0.454543	1.86177	0.0011429	0.0088099	151	143	E2F1, NUDT1, KIF4A, RAD51, CDK2, CDC45, MYBL2,RNASEH2A, PRC1, PKMYT1, SLC7A5, DSN1, FAM64A, KIFC1, UBE2C, MCM10, MCM2, TUBA1B, BLM, NCAPG, MELK, DNAJC9, KIF20A, CCNB2, NDC80, MKI67, PTTG1, RFC4, H2AFZ, CCNE2, EXO1, AURKB, MCM6, TPX2, GTSE1, NUTF2, TTK, CCNB1, KIF18B, CENPF, FOXM1, DLGAP5, CEP55, BYSL, CCNA2, RRM2, TOP2A, ASPM, TRIP13, CDCA8, PLK1, BIRC5, NCAPG2, SHMT2, DSCC1, HJURP, VRK1, NCAPH, …
PLASARI_TGFB1_TARGETS_10HR_UP	0.44572	1.86083	0	0.0088357	199	190	PTHLH, KCTD11, HK2, ALDH1A2, FJX1, CSPG4, NGF, SLC2A1, FOXS1, FLNB, VEGFA, CD40, PKP1, TGFB1, COL8A2, SFN, GUCY1B3, NRARP, PPP1R13L, HEYL, RNF149, UNC5B, MMP9, MCAM, RUNX1, FOXC2, PMEPA1, HEY1, DUSP14, FLT1, ITGA5, HIVEP3, JAG1, WNT9A, LRRC8C, PLAUR, MICAL2, PLK3, CHST11, ZNF469, PDGFA, KLHDC8A, DUSP4, MYO1D, GJB3, SLC41A2, INHBA, CX3CL1, CCL20, GFOD1, PDGFC, LAS1L, TMCC3, NFATC1, SNAI1, MGLL, PD…
FURUKAWA_DUSP6_TARGETS_PCI35_DN	0.506086	1.86218	0	0.008843	74	69	MARCH4, HPCAL1, NGF, LAMB3, DYSF, DTL, ETS1, PMEPA1, MCM5,LINC00341, PRC1, ADORA2B, BLM, NCAPG, CALB2, KIF20B, CCNB2, RFC4, CCNE2, TUSC1, AURKB, TPX2, CCNB1, CENPF, DLGAP5, CEP55, CCNA2, PRIM1, PBK, PHLDA2, LAT2, HJURP,ARHGAP11A, NUSAP1, KIF2C, CENPA, EPHA2, SLCO2A1, RRM1, RIOK1, WDR3, MAFF, NCAPD2, POLQ, STIL, WDR5, ORC6, KIF11, AURKA, MCM4, EBNA1BP2, RACGAP1, PDLIM2, PRMT5, MMP1, CKAP2, RTEL1, …
STREICHER_LSM1_TARGETS_DN	0.661474	1.86117	0.0015601	0.0088499	19	19	IL1RAP, TGFB1, DUSP7, ETS1, FOXC2,TNFRSF10B, IL1R2, ZNF232, IL15RA,TNFRSF10A, FZD8, E2F7, RBL1, FST, IL6, ID1, ITGB6, FGF2, SFRP1
KIM_WT1_TARGETS_8HR_UP	0.447884	1.86003	0	0.0088933	164	160	PTHLH, PDLIM4, CSPG4, TBC1D2, DARS, RSL1D1, TGFB1I1, SLC7A1, IL1RAP, SFN, LAMB3, RLF, HSPA6, DUSP7, ENO2, PLXND1, FHOD1, IL4R, PA2G4,HNRNPUL1, PIAS2,SERPINH1, ADM, PLEC, CDR2L, PLAUR, TPBG, SOX9, CHST3, TM4SF1, PEA15, SWAP70, ATP1A2, PLEKHO1, ADAM19, SPRED2, ACTN1, CX3CL1, PDGFC, LYN, MARK4, GRB10, RBM8A, ULBP2, WWTR1, ARHGDIA, EMP1, ZYX, PIK3CD, SRP72, CBFB, MICALL1, RYBP, PHLDA2, PPP3CA, AREG, …
SMIRNOV_CIRCULATING_ENDOTHELIOCYTES_IN_CANCER_UP	0.45655	1.85891	0	0.0089581	158	152	DAPK2, LRRC17, ZNF395, PPARD, VEGFA, QSOX1, TGFB1, IGFBP3, HSPA6, ULK1, ALOX5, CD1D, MCAM, ADM, CHN1, GM2A, PMP22, IFNGR2, TGFBI, EPAS1, SHC1, SPARC, CD93, PRSS23, SLC7A5, ELF4, IL21R, DKK3, SLC2A3, DUSP4, MARCKSL1, TIMP2, SLC16A6, PDLIM7, PERP, CD58, CCL20, KDM5B, ENG, TIE1, CLU, CEBPB, ZNF134, ADAP2, IRAK3, MAPK7, COL7A1, BCAT1, BIRC5, TMBIM1, RARA, BHLHE40, SPHK1, TNFRSF1A, MYLK, HCK, CDKN1A, …
MATZUK_MALE_REPRODUCTION_SERTOLI	0.615786	1.85897	0	0.0089905	28	25	B4GALNT1, INHA, NR0B1, GJA1, CDKN2C, GDI1, HMGB2, SOX8, SLC12A2, DHH, MAN2A2, SF1, SBF1, ACVR2A, KITLG, AR, LHCGR, HMGA1, CLDN11, CYP17A1, BCL2L2, RBP4, DNAJA1, MAP7,SERPINA5
QI_HYPOXIA	0.456645	1.85793	0	0.0090543	140	134	CA9, EGLN3, PGF, HK2, SAP30, FAM57A, SLC2A1, P4HA1, VEGFA, RASL12, SLC27A3, KDM4B, IGFBP3, ELMO1, ALDOC, MXI1, PDK1, PFKP, KRT19, ADM, ATG9B, TRIOBP, NDRG1, VLDLR, PLOD1, KDM3A, DDIT4, SOX9, PPP1R3B, ZNF469, SLC41A2, LOX, NAT6, PLOD2, CCNG2, ALDOA, HIGD1A, EFNA1, PPP1R3C, PGAM1, P4HA2, REEP1, RNF126, DYRK1B, FOXO3, BHLHE40, KIF21B, OSTF1, BNIP3, EGLN1, CDKN1A, AMPD3, ESPN, GPI, ARRDC3, FZD1, PGM1…
KEGG_HUNTINGTONS_DISEASE	-0.366951	-1.90264	0	0.0092321	185	162	COX4I2,NDUFA4L2, TP53, BBC3, BAX, DNAH2, BDNF, IFT57, CREB3L4, NRF1, POLR2D, RCOR1, DCTN1, CASP8, POLR2J3, SP1, CASP3, AP2A1, CLTCL1, CREB1, NDUFS5, ATP5G2, SIN3A, GPX1, TGM2, DNAL4, APAF1, ITPR1, AP2B1, POLR2J2, GNAQ, HDAC2, CREBBP, PLCB3, PLCB1, COX7A1, TBPL1, CREB5, POLR2I, DCTN4, POLR2G, DLG4, POLR2H, HDAC1, SLC25A6, AP2S1, POLR2F, DCTN2, CREB3, PLCB2, AP2M1, PLCB4, EP300, TBP, NDUFA7, HTT, D…
REACTOME_DNA_STRAND_ELONGATION	0.596931	1.85609	0.0028531	0.0092511	30	30	RFC2, LIG1, MCM7,GINS2, RPA1, MCM5,CDC45, RFC5, MCM2, RFC4, MCM6,PRIM1, FEN1,POLA1,PRIM2,POLD1,GINS4, RPA2, MCM3, PCNA, RFC3,POLA2, MCM4,GINS1,POLD4,POLD3,POLD2, DNA2, RPA3, MCM8
WALLACE_PROSTATE_CANCER_UP	-0.566685	-1.90077	0	0.0092567	20	20	PPP3CA, MYC, EIF3I, ST14, SOX4,SLC25A6, FASN, PRSS8, POLD2, DAP, TSTA3, HPN, GDF15, AHCY, LIG3, ODC1, TPD52, UAP1, BDH1, AMACR
WALLACE_PROSTATE_CANCER_RACE_UP	0.431654	1.85508	0	0.0093498	299	275	HLA-G, COL21A1, ELOVL2, CCND1, AHNAK2, IRS2, OLFML2A, IDO1, EDNRA, MMP9, CELF2, GMFG, PECAM1, ITGA4, RASGRP3, CXCR4, LSP1, ISG20, FLI1, ARHGAP25, CTNNB1, GIMAP6, IFI44, LCP2, IFI44L, CD93, ADAMDEC1, SLC7A5, ARL4C, P2RY14, ARHGAP15, RNASE1, ICAM2, ETS2, IFITM1, C1orf54, IFI16, RUNX3, IFITM3, STK17B, IFITM2, KIAA1462, ITGB2, ADCY7, FYN, MYB, NID1, HLA-E, HCLS1, GNG11, APOL1, IL1R2, SYT11, PLEKHO2, …
KORKOLA_TERATOMA_UP	0.679286	1.85422	0.0015576	0.0094519	16	16	ARHGDIB, ETV6, CLEC2B, SLC2A3, CCND2, RECQL, MGP, PHB2,C12orf57, EMP1, A2M,TNFRSF1A, CLEC7A, PTMS, ITFG2, TAPBPL
HELLEBREKERS_SILENCED_DURING_TUMOR_ANGIOGENESIS	0.490507	1.85335	0	0.0095054	80	75	TGFA, QSOX1, IGFBP3, FILIP1, TMEM45A, MCM7, DMD, ADM, COL4A2, TGFB2, SMTN, DKK3, IGFBP7, BDNF, ITGA3, INHBA, ADA, COL6A1, IFI6, CLU, LAMC2, VCAN, NNAT, PDLIM3, ABI3BP, LRP1, CNN1, MX1, TAGLN, IFI27, FBN1, NDRG4, EDIL3, CDKN1A, MMP25, CPE, RELB, CXCL6, TACSTD2, F2RL2, NUAK1, HLA-C, TNFAIP3, CXCL1, TSPAN2, UCP2, FAT1, IER3, CLIP3, ICAM1, FTH1, IL6, CREB3L1, FUCA1, SDC4, IL32, IGF2R, ABCG1, FABP4, C…
KRIEG_HYPOXIA_VIA_KDM3A	0.528085	1.85292	0.0013459	0.0095238	53	52	SLC7A1, IL1RAP, EDN1, LAMB3, MARCH3, CBR3, CXCL5, ADM,C15orf48, KDM3A, PLAUR, TYMS, NRP2, TM4SF1, FAM64A, NECAP2, TM4SF19, RBM3,SERPINB8, LAMC2, FABP6, BIRC3, COL7A1, PHLDA2, FBXO32, KIF2C, EDN2,SERPINE1,PPP1R15A, VEZT, ANP32E, TGM2, HMGA2, CXCL1, ASPH, YWHAG, NFKBIE, SYTL3, ZC3H12A, JUNB, MAP3K14, HMOX1, STEAP3, CLEC4E, SEC14L2, SPINK1, RGPD4, INSIG1, GDF15, EBP, PIK3IP1, RRAGD
YAMASHITA_LIVER_CANCER_STEM_CELL_DN	-0.421262	-1.89299	0	0.0096264	76	71	CDKN2A, ADCY3, RARG, SAA4, FMO3, ACSL5, MASP1, MAP3K5, FABP5, MASP2, CD14, MAPK13, CYP2C8, SNAI2, APOC4, MAP2K2, C1R, GSTP1, GSTM1, NR1I2, APOA5, UGT2B15, SULT2A1, FKBP5, CYP8B1, PIK3C3, THBS1, GSTA1, C8A, CES1, ABCB4, APCS, HNF4A, GSTM4, ESR1, C6, C8B, UGT2B7, CYP3A4,SERPINC1, SLC27A2, PRKCD, HRG, NQO2, NR1I3, FMO4, HMGCR, CES2, ACSL4, GADD45B, CYP3A7, RBP5, CYP1A2, AOX1, F11, GADD45A, CYP7B1, K…
THUM_MIR21_TARGETS_HEART_DISEASE_UP	0.680275	1.85158	0.0015924	0.0096543	17	16	COL5A2, TGFB3, WISP2, BGN,COL1A2,COL1A1, LOX, LTBP2, CRLF1, ELN, POSTN, ASPN, LUM, SVEP1, RCAN1, APOD
HOSHIDA_LIVER_CANCER_LATE_RECURRENCE_DN	-0.445049	-1.89357	0	0.0096716	69	56	CHRNA5, TMEM11, GARNL3, ADRA2B, TESK1, LCAT, URB2, SMAD1, USF2,PRKAR1B, GAB1, ZBTB5, CDA, CTNND1, HSPBP1, PEMT, U2AF2, PITX1, ATP5D, ADRA1A, APBA1, SPINK5, PPOX, PHGDH, HAAO, CASP6,SULT1A1, LHCGR, PSMB3, DACH1, PKIA, NAP1L3, DHRS2, BPI, CDH17, MME, ENPP1, PIR,GADD45G, GCHFR, ZER1, TJP2, ALAD, TEK, ACP2, SSFA2, COBLL1, USP14, PMM1, THRB,PPP1R1A, PCYT2, FDX1,SLC35D1,ST3GAL6, MAOA
KEGG_TYROSINE_METABOLISM	-0.484896	-1.89095	0	0.0097078	42	37	IL4I1, NAT6, MIF,ALDH3B1, AOC3, LCMT1, METTL6, AOC2, LCMT2, COMT, HPD, ADH6,METTL2B,ALDH1A3, DCT, DDC, MAOB,WBSCR22, HEMK1, TYRP1, ADH1A, FAH, DBH, ADH1B, TRMT11, AOX1, ADH1C,ALDH3A1,ALDH3B2, ADH4, ADH5, HGD, GSTZ1, TAT, GOT1, GOT2, MAOA
REACTOME_METABOLISM_OF_VITAMINS_AND_COFACTORS	-0.457874	-1.89471	0	0.0097367	51	50	SLC2A1, CYB5R3, SLC2A3, NMNAT2, NADSYN1, MOCS3, PPCDC, SLC23A2,SLC25A32, MOCS1, FASN, PANK4, SLC46A1, NAMPT, FPGS, ACP5, GSTO2, PDXK, SLC19A1, PANK2, MTHFR, GSTO1, RFK, SLC23A1, NADK, PPCS, ENPP1, DHFR, TPK1,AASDHPPT, CYB5A, GPHN, MTHFD1, THTPA, NMNAT1, PNPO, SLC19A3, FLAD1, SLC19A2, COASY,SLC25A16, MOCS2, PANK3, SLC5A6, MOCOS, SHMT1, NFS1, PANK1, QPRT, NMNAT3
SENESE_HDAC2_TARGETS_DN	0.462672	1.85022	0	0.0097666	133	115	KRT81, KRT17, FGF11, SFTA1P, GXYLT2, FOXS1, NRXN3, EDN1, COL11A1, EFEMP2, GPNMB, FKBP9, COL5A2, PDLIM1, TPM1, TMEM100, LSP1, LBH, JAG1, CTXN1, IGFBP7, COL1A1, LOX, SCEL, NEFL, SYT11, UNKL, CLU, SCARA3, RTKN2, DEPDC1, COL3A1, GALNT2, KRT14, NFIB, SSBP2, MYL9, TAGLN, S100A4, ZNF362, SORL1, CDH11, LPAR5, LOXL1, EDN2, ALDH3B1, TCEA2, CCL26, DACT1, NEXN, HDAC2, FADS2, MFAP5, ZCCHC24, RASA4, PLAC8, ETA…
PID_UPA_UPAR_PATHWAY	0.547419	1.8497	0	0.0097923	42	40	PDGFD, TGFB1, MMP9, VLDLR, ITGB1, ITGA5, PLAUR, PDGFRB, FN1, ITGA3, ITGB2, RAC1, EGFR, FPR3, MMP13, NCL, LRP1, CRK, ITGB5, ITGAM,SERPINE1, FPR1, CTSG, MMP12, FPR2, HGF, MMP3, ITGB3, KLK4, BCAR1, DOCK1, SRC, VTN, FGG, PLG, FGB, ITGAV, FGA, PLAU, GPLD1
WANG_LSD1_TARGETS_UP	0.640132	1.84889	0.0060241	0.0098562	24	21	SIX1, CD1D, MDK, TGFB2, LGALS1, ELK3, PYCARD, PDGFA, EZR, MGP, HEPH, CSRP2, GAS6, IGFBP5,EPB41L2, IGFBP2, CCNE1, CDKN1C,GADD45G, RPRM, RELN
PID_AP1_PATHWAY	0.515993	1.84693	0.0013072	0.0100726	70	60	CDKN2A, CCND1, TGFB1, EDN1, GJA1, MMP9, ETS1, TP53, PTEN, CTNNB1, TIMP1, COL1A2, NR3C1, MYB, TCF7L2, NFATC1, CBFB, HLA-A, SP1, ELF1, MYC, CREB1, FOSL1, NFATC2, DUSP1, CDKN1B, JUN, FOSB, JUNB, JUND, MAF, IFNG, ATF3, EP300, FOS, EGR1, NTS, IL10, IL6,BCL2L11, NFATC3, MAFG, CDK1, DMTF1, MT2A, CYR61, MMP1, TRIP6, CRTC1, FABP4, AGT, FOSL2, CCL2, COPS5, BAG1, ESR1, ATF2, GATA2, HIF1A, PLAU
PAPASPYRIDONOS_UNSTABLE_ATEROSCLEROTIC_PLAQUE_DN	0.538455	1.84414	0.0014025	0.0104102	43	42	RASL12, GJA1, GRK5, PAM, TPM1, PMEPA1, JAM3, KCNMB1, LHFP,FAM129A, EMP2, MAP1B, EGFR, CSRP2, EID1, SUSD5, MYH11, MYLK, NOV, ACTC1, MYLIP, TNS1, MAGED2, SYNPO2, LMOD1, FMOD, DSTN, PKD2, MXRA7, PRELP, PTGIS, PKIG,RABGAP1, SOD3, CRIM1, ID4, DSEL, FIBIN, ADCY9, HSPB1, PFKM,TPD52L1
FRIDMAN_SENESCENCE_UP	0.498724	1.84315	0	0.0104963	77	76	CDKN2A, CCND1, TGFB1I1, IGFBP3, CDKN2B, VIM, ESM1, NDN, TP53, TFAP2A, GSN, SPARC, RAB31, CD44, IGFBP7, PEA15, FN1, COL1A2, IFI16, RGL2, ISG15, RAC1, RRAS, TES, FILIP1L, RABGGTA, GUK1, MDM2, IRF7, RHOB, IGFBP5, IGSF3, S100A11, CDKN1A, NME2, RAB13,SERPINE1, CYP1B1, HTATIP2, CREG1, IGFBP2, TNFAIP3, IGFBP6, CDKN2D, C9orf3, IGFBP1, IFNG, IGFBP4, EIF2S2, ING1, MAP2K3, SMURF2, CTGF, MMP1, F3, CITED2, CL…
REACTOME_DEGRADATION_OF_THE_EXTRACELLULAR_MATRIX	0.642716	1.83942	0.0046875	0.0108926	29	20	TPSAB1, MMP9, MMP11, MMP15, MMP16, MMP14, TIMP1, TIMP2, MMP13, MMP7, MMP2, MMP25, CTSG, MMP17, FURIN, MMP24, MMP3, MMP1, PLG, KLKB1
HOFFMANN_PRE_BI_TO_LARGE_PRE_BII_LYMPHOCYTE_DN	0.504458	1.83819	0	0.0110473	75	66	KRT86, FXYD5, TRIM21, ANXA2, CHRNB1, NDRG1,MAPK8IP3, GIMAP4, ANXA1, TBXA2R, DBNDD2, EEF2, SIPA1, SSBP4, ITM2C, CCND2, ACTN1, TNFAIP6, ADA, RCN1, ENG, AHNAK, EFNB3, CCL5, EMP1, ZYX, FAM189B, RUNX2, DAB2IP, DSG2, PTPN22, PPIC, BCL2, STAT4, MAGED2, CD9, LRFN4, NPC1, FRMD6, EMB, THY1, HEMGN, KLF10, SEMA7A, SQLE, MGST2, HSPBP1, IFIT2, LTB, ANKRD28, PKIB, HEXA, GBP7, ELOVL6, THRA, MDN1, GTF2H1, SIAE, S…
DURAND_STROMA_S_UP	0.426428	1.83608	0	0.0113343	297	269	B4GALNT1, FABP7, PDLIM4, RTP4, LHX9, C3orf67, PDE1B, SLC27A3, ADCY3, SFRP2, ANGPTL4, TRIM21, CDKN2B, LRRC4C, CALCRL, PLXND1,CSGALNACT1, CORO2A, SIX1, IL4R, JAK3, TMEM47, EN1, EFNA5, SYN1, MMP15, CD248, RASSF2, NDRG1, TFAP2A, PTPRF, NCK2, S1PR1, NOTCH4, PMP22, SEMA3F, ROR2, WISP2, LGALSL, TGFBI, COL6A2, TCF7L1, OSMR, PDGFRB, PBXIP1, SLC1A3, CHST2, INF2, CRIP2, ARHGEF6, CDK18, AHR, FAM129A, COL1A2,…
HOFFMANN_LARGE_TO_SMALL_PRE_BII_LYMPHOCYTE_UP	0.447259	1.83412	0	0.0115567	163	157	LIG1, TUBB4B, RPL10, ANLN, KIF4A, ANP32B, U2AF1, NT5DC2, RPA1, MCM5, RAD51, TRIM46, GSN, NCAPH2, CDC45, TUBA1A, LDHA, PRC1, VPS72, MMP14, RFC5, CDKN2C, UBE2C,KIAA0101, MCM10, CRIP2, TUBA1B, TUBB, MELK, CKS1B, KIF20A, CCNB2, CHAF1B, PLK4, MKI67, COIL, AURKB, MCM6, TTK, CCNB1, CBX1, BRCA2, DLGAP5, TUBB3, CCNA2, RRM2, HMGB2, TOP2A, TRIP13, NASP, ENO1, CDC25C, CDCA5, MYH11, ABR, NCAPH, FEN1, BUB1, CA…
PETROVA_PROX1_TARGETS_UP	0.6081	1.83088	0.0014556	0.0117675	28	27	PYGL, BTBD3, FLT4,TBXA2R, MYBL2, UBE2C, NDC80, CCNE2, MCM6,PDLIM3, CSRP2, NR2F1, PEG10, HMGB2, TOP2A, BUB1B, SMC4, TK1, DSP, GINS1, CDK1, CH25H,CDKN1C, SMAGP, CREM,GPRC5B, GCH1
ONDER_CDH1_TARGETS_2_DN	0.410415	1.83158	0	0.0117704	464	417	CA9, KRT81, GPR87, KRT17, PTHLH, DUOX1, NMU, TGFA, FXYD3, COL17A1, KRT15, ANO1, ARTN, MALL, LAMA3, MREG, HS3ST2, FLNB, SLC27A3, IL1RAP, PTAFR, SFN, RHBDF2, PKP3, JAG2, EDN1, LAMB3, RAB38, ARHGDIB, TREM2, BHLHE41, CORO2A, IL4R, LSR, CD1D, MMP9, DMD, ITGB4, PTPRE, PLK2, MST1R, NDRG1, STAC, GM2A, FEZ1, MPZL2, DAPP1, C10orf10, ISG20, PTPRF, SDC1, SERPINA3, GPRC5A, SEMA3F, SMPDL3B, ARHGAP25, CDCP1, RA…
AMIT_EGF_RESPONSE_480_MCF10A	0.549864	1.83232	0	0.0117774	43	40	PTHLH, HPCAL1, MREG, VEGFA, BDKRB1, SMTN, SOX9, ARL4C, CHST11, VEGFC, TRIB3, GRB10, PHLDA2, GIT2, EGLN1, ITGA2, GPR153, SCG5, SH2D2A, STC1, SRRD, FST,UNC119B, TIMM10, NAV3, FOXD1, PMAIP1, PLEK2, SSNA1, RFC1, RHOF, GFPT1, RAB22A,CYP27B1, LYPD3, POPDC3, MAPK1, CABIN1, ODC1, APIP
WARTERS_RESPONSE_TO_IR_SKIN	0.506052	1.83189	0.0012804	0.0117863	83	69	DDB2, TNFRSF10C, FDXR, TMEM173, MICALL2, FAM198B, THSD1, GM2A, BBC3, JAM3, CABYR, TGFBI, SNHG8, PPM1D, TRIAP1, TRIM22, FBXW7, ZNF219, ZNF79, NOTCH1, RPS27L, FAS, FRMD4A, C12orf45, MDM2, ID3, PRF1, ALCAM, POLH, E2F7, PPFIBP1, ANKRA2, SESN1, CDKN1A, NODAL, COMP, SCN9A, TMTC3, SDPR, ETV7, TP53INP1, CCNG1, ZMAT3,PALM2-AKAP2, ASGR1, RAD51C, HSPA4L, DNAJB4, RRM2B, BTG3, VWCE, MAGT1, BLOC1S2, DEPDC7, DR…
KANG_AR_TARGETS_UP	0.67128	1.83099	0.0047393	0.0117996	17	16	PHEX, MMP9, BMP1,COL4A1,COL4A2, TGFB2, TGFB3,COL5A1, PDGFA,COL6A1, MMP2, BMP5, TUFT1, FGFR2, AHSG, VDR
REACTOME_TRANS_GOLGI_NETWORK_VESICLE_BUDDING	-0.434808	-1.87074	0	0.011844	60	57	BLOC1S3, ARF1, AP3S1, CTSZ, DNASE2, AP1S2, STX4, TXNDC5, SNAPIN, AP4B1, VAMP2, M6PR, CPD, DNM2,TBC1D8B, FTH1, TFRC, DTNBP1, NECAP1, PUM1, SNAP23, IGF2R, ARRB1, AP1M1, AP1S1, SORT1, TGOLN2, CLTA, FTL, SH3D19, SNX9,BLOC1S1, YIPF6, AP4E1, RAB5C, SH3GL2,PIK3C2A, GAK, NAPA, VAMP8, GBF1,TPD52L1, OCRL, HSPA8, PICALM, GNS, CLTC, SNX2, TPD52, AP3B1, DNAJC6, AP1B1, SNX5, AP1M2, AP1G1, VAMP7, HIP1R
MORI_LARGE_PRE_BII_LYMPHOCYTE_UP	0.483615	1.82959	0.0012484	0.0118619	86	83	LIG1, TUBB4B, DTL, CDCA7, MCM7, LGALS9, PRDX4, MCM5, LGALS1, MYBL2, TUBA1A, PRC1, CDKN2C, ASF1B, MCM2, HMGN2, TUBB, MELK, CKS1B, CCNB2, MKI67, MCM6, TTK, CCNB1, CBX1, CCNA2, RRM2, TOP2A, CDCA5, NCAPH,PPP2R5C, CDKN1A, E2F8, LMNB1, ZNF358, CENPA, H2AFX, RRM1, CDC20, ANP32E, CDKN3, MCM3, PSMC1, SMC4, CALM2, CDCA3, BUB3,SLC29A1, PPIA, NUCKS1, XRCC6, DUT,SLC12A3, CENPE, HMGB1, HMMR, AURKA,RACGAP1, RBB…
NABA_ECM_AFFILIATED	0.45946	1.82986	0	0.0118657	171	126	SEMA5B, PLXDC1, CSPG4, LGALS3, SFTA2,CLEC14A, CLEC1A, PLXND1, CLEC2D,C1QTNF2, ANXA2, LGALS9, ANXA4, CLEC2B,C1QTNF6, SEMA4B, SDC1, LGALS1, SEMA3F, ANXA1, LGALSL, PLXNA3,C1QTNF1, CSPG5, ELFN2, SFTPD, SEMA6B,CLEC11A, PLXNA1, PLXNA2, MUC1, ANXA5, MUC12, SEMA4C,LGALS9C, FCN3, GPC1, SDC3, CLEC5A, SEMA6A, SEMA4F, ANXA8, PLXNB2, C1QA, GPC6, MUC16, C1QC, C1QB, MUC5B, CLEC4A, CLEC7A, SEMA6C, CD209, LMAN1, …
SIMBULAN_UV_RESPONSE_IMMORTALIZED_DN	0.581729	1.83004	0.0014599	0.0118899	31	31	CCND1, LAMA3, DUSP7, NAP1L1, SF3A2, PLEC, CDH3, FN1, EGFR, AHNAK, EMP1, RRM2, JAK1, MYC, ROCK1, CALD1, ITGA2, IGF1R, THBD, ITGA6, EREG, NBN, ID1, DDX21, SEMA3C, THBS1, TACC1, PTP4A1,PRKAR1A, TOP2B, RDX
REACTOME_METABOLISM_OF_LIPIDS_AND_LIPOPROTEINS	-0.326337	-1.86524	0	0.0124318	478	429	LPCAT1, CDK19, ELOVL2, MED6, ANGPTL4, SLC27A1, PLA2G4D, ACLY, MED10, BMP1, GM2A, STS, CAV1, SDC1, PLD2, P4HB, HSPG2, PTEN, PIK3R6, SCARB1, PLA2G5, ARF1, MED13L, DEGS1, MED26, TRIB3, PLD3, PPP1CC, PITPNB, CERS5, INPP4B, NRF1, LPCAT4, ABCC3, NCOR2, PIP5K1C, PIK3R5, SLC44A2, KDSR, CDS2, MED15, TEAD4, PIP4K2B, PIK3R3, GPAT2, WWTR1, MGLL, FABP6, PLA2G16, PIK3CD, PIK3CB, ARSG, INPP5K, FAR2, LPGAT1, SUM…
DUTERTRE_ESTRADIOL_RESPONSE_24HR_UP	0.417011	1.82483	0	0.0124766	324	310	AMZ1, ELOVL2, KCNK15, STC2, CDCA7L, RFC2, CDT1, LIG1, SLC2A1, HR, IL1RAP, H19, NR2C2AP, E2F1, EXOSC2, DTL, CDCA7, MCM7, ANLN, UHRF1, KIF4A, PAQR4, GINS2, FAM111B, MCM5, EXOSC5, CHRNA5, C1QTNF6, CENPJ, RAD51, CHAF1A, NCAPH2, WISP2, CDK2, SUV39H1, CDC45, MYBL2, CDCA4, PSMC3IP, RNASEH2A, RAB31, PRC1, TYMS, PKMYT1, SLC7A5, CLSPN, RFC5, DSN1, HAUS4, BRCA1, KIFC1, FANCI, ASF1B, CDC6, UBE2C, KIAA0101, M…
CARD_MIR302A_TARGETS	0.488485	1.82349	0	0.0126386	77	73	FOXJ3, SOX11, CCND1, VEGFA, E2F1, VLDLR, ASAP1,TNFSF11, CDK2, MBD2, ZHX2, JAZF1, CCND2, EPC2, CCNG2, RB1, ZFHX4, HLF, CDK6, MAP1B, EFNB3, TWIST1, WEE1, DLL1, MNT, FOXJ2, TSHZ3, ZFPM2, IKZF2, CNOT7, STC1, TGFBR2, SMAD7, PHTF2, JUNB, RBBP6, LIMK1, NR2F2, SASH1, MYT1, STAT3, DNMT1, KLF9, ZNF367, RBBP4, RBBP7, ARID4B, RARB, DDX5, SRSF2, KAT6A, RNF6, ARID4A, NANOS1,ZNF385A, EPHA4, RIC8B, YES1, EIF4G2,…
REACTOME_SIGNALING_BY_FGFR1_FUSION_MUTANTS	-0.57913	-1.86145	0.0028011	0.0127288	19	18	PLCG1, GAB2, STAT3, MYO18A, STAT5B, CPSF6, PIK3CA, CNTRL, TRIM24, STAT1, PIK3R1, CUX1, ZMYM2,FGFR1OP2, GRB2, BCR, STAT5A, FGFR1OP
KEGG_AMINOACYL_TRNA_BIOSYNTHESIS	-0.465901	-1.86031	0	0.0127623	41	41	DARS, HARS, RARS2, TARSL2, CARS, RARS, SARS, QARS, KARS, WARS2, TARS, YARS, LARS, VARS, EPRS, FARSA, FARSB, PARS2, AARS2, FARS2, EARS2, MTFMT, WARS, YARS2, CARS2, IARS, VARS2, MARS2, SARS2, TARS2, GARS, HARS2, MARS, IARS2, AARS, PSTK, LARS2,SEPSECS, NARS, DARS2, NARS2
SNIJDERS_AMPLIFIED_IN_HEAD_AND_NECK_TUMORS	0.557428	1.82111	0.0014286	0.0129588	37	36	CCND1, FJX1, LAMA3, PTPRR, GLI2, JAG1, CD44, TM4SF1, RBPJ, KDM4C, CDK6, EGFR, ADAM9, TLN1, TRAF6, MDM2, BIRC3, MMP7, PHF21A, FZD1, CTTN, IL7R, YAP1, STIM2, SKP2, FGFR1, RAD1, BIRC2, UHRF2, TACC1, EYS, PTP4A1, PTPRD, BAG4,MAPK8IP1, PAK1
LY_AGING_MIDDLE_DN	0.653739	1.81979	0.0047771	0.0130343	16	16	MYBL2,UBE2C,HMGN2,CCNB1,CENPF,FOXM1,CCNA2, PLK1,KIF2C,CENPA,H2AFX, CCNF,CDC20,KIF11,PTGS2,KIF23
KEGG_PATHWAYS_IN_CANCER	0.414677	1.81996	0	0.0130621	328	301	DAPK2, TGFA, CDKN2A, FGF11, EGLN3, PGF, CCND1, PPARD, LAMA3, LAMB2, SLC2A1, VEGFA, TGFB1, NOS2, LAMB3, LAMA4, GLI2, PML, CDKN2B, E2F1, MMP9, TRAF5, RUNX1, ETS1, PIAS2, COL4A1, COL4A2, TGFB2, FGF13, TP53, ITGB1, RAD51, TGFB3, DVL2, RELA, CDK2, EPAS1, BAX, WNT9A, PTEN, RALGDS, TCF7L1, LAMC1, CTNNB1, MAPK3, PDGFRB, PIAS3, FZD9, VEGFC, CCNA1, FN1, PDGFA, TPM3, ITGA3, GLI1,HSP90AB1, BID, BMP2, TCF7, C…
GRAHAM_CML_DIVIDING_VS_NORMAL_QUIESCENT_UP	0.438336	1.82021	0.0011351	0.0130821	181	172	TFR2, PIEZO2, PRG2, TPSB2, TPSAB1, NUDT1, KIF4A, CPA3, PDLIM1, NT5DC2, GINS2, TPM1, PRDX4, MCM5, RAD51, PMP22, CDC45, TUBB6, LMNA,RNASEH2A, RAB31, PRC1, TYMS, MICAL2, SLC7A5, BRCA1, STK39, CLEC11A, FANCI, CDC6, UBE2C,KIAA0101, MCM10, MCM2, NCAPG, MELK, POLE2, ACTN1, CKS1B, KIF20A, SNRPD1, CCNB2, NDC80, XIST, RFC4, CCNE2, AURKB, TPX2, HDC, TTK, CCNB1, CENPM, KIF18B, CENPF, DLGAP5, CEP55, NUP85, CC…
WU_HBX_TARGETS_3_UP	0.646137	1.81925	0.0045317	0.0130853	18	18	CCNI, CASP4,IFNAR2, TYMS, MFNG,IFITM1, MYB, FAS, MYC, CDK4, CDKN3, DAD1, VCL, TFAP4, GSTM2,SLC2A5, PDCD2, TWF1
OUELLET_CULTURED_OVARIAN_CANCER_INVASIVE_VS_LMP_DN	0.607946	1.81838	0.0073964	0.0131868	35	23	CDH8, LRRC17, COL11A1,SERPINA3, LIMK2, FLNA, SIGMAR1, MAP1A, SIRPB1, AEBP1, MMP2, HYAL2, KRT6A, NELL2, GLI3, GSTP1, CFLAR, ATM, FUT3, FBN2, BBS9, AR, TRIB1
CLASPER_LYMPHATIC_VESSELS_DURING_METASTASIS_DN	0.560554	1.81755	0.0029412	0.0132056	36	35	COL5A2, FOXC2,EMILIN2, SDC1, COL6A2, COL5A1, BGN, TIMP1, COL1A2, PCOLCE, LOX, COL6A1, ROBO1, VCAN, COL3A1, GPC1, LTBP2, FBN1, COL6A3, CDH11, LOXL1, CXCL6, NT5E, S1PR3, CXCL1, LTBP1, JAM2, SDC2, SEMA3C, LPAR1, LAMA2,PCOLCE2, SYK, RDX, CDH2
VERHAAK_GLIOBLASTOMA_CLASSICAL	0.440997	1.81621	0	0.0134187	162	153	RIN1, ELOVL2, IRS2, LAMB2, RFX2, NOS2, DOCK6, GLI2, GJA1, TRIB2, TGFB3, PRKD2, PMP22, JAG1, LHFP, ITGA7, WSCD1, ARAP3, PLA2G5, SOX9, SLC12A4, FBXO17, PDGFA, KLHDC8A, BLM, ADAM19, ZNF304, ZNF671, CD3EAP, SLC6A9, ANXA5, PTPRA,KIAA0355, ZFHX4, MLC1, PRPF31, CDK6, LRP5, ZNF419, ILK, ZNF134, EGFR, CD151, SHOX2, BTBD2, DLC1, ZNF211, ZNF227, GLG1, TLE2, CDH4, TEAD3, SEMA6A, ZNF264, ZNF235, GRIK1, IRF3, …
RASHI_RESPONSE_TO_IONIZING_RADIATION_2	0.455633	1.81584	0	0.0134211	127	120	B4GALNT1, NGF, LGALS3, PKP3, EDN1, PHLDA3, PLK2, KRT19, TGFB2, TAGLN2, DENND5A, RELA, ANXA1, IFNGR2, BAX, GJB5, RELL1, INPP5A, PRSS23, DSC2, TRIB3, RBPJ, TIMP2, GNAI3, TNIP1, PTPRA, CX3CL1, KLF5, VPS37B, ACTA2, CXADR,C19orf48, LAMC2, GNA13, CSRP2, CLDN7, WWTR1, MGLL, MDM2, BIRC3, RNPS1, KLF4, CDKN1A, MAN2B1, NFKB2, KLF6, BCL10, RELB, ST5, TCF25, TACSTD2, RHOU, STXBP1, CSF1, NFKBIA,MAPKAPK2, PCGF2…
REACTOME_REGULATION_OF_HYPOXIA_INDUCIBLE_FACTOR_HIF_BY_OXYGEN	0.621453	1.81559	0.0029806	0.0134428	25	23	CA9, EGLN3, VEGFA, EPAS1, EPO, UBA52,RPS27A,UBE2D2, EGLN1,HIF1AN,CREBBP, HIF3A, EGLN2, EP300, ARNT, RBX1, TCEB1, CUL2,UBE2D1,UBE2D3, TCEB2, HIF1A, VHL
TANG_SENESCENCE_TP53_TARGETS_DN	0.511688	1.81469	0	0.0134874	57	54	KIF4A, NRGN, TCF4, NUP62, PRC1, EXOSC9, UBE2C, NCAPG, ADARB1, KIF20B, KIF20A, CCNB2, PLK4, PTTG1, MAP1B, AURKB, TREM1, TPX2, TTK, CCNA2, TOP2A, PBK, IGFBP5, BIRC5, EZH2, BUB1, NEK2, LMNB1, NUSAP1, BARD1, CENPA, CDC20, PPL, SMC4, DBF4, MRE11A, TK1, CENPE, KIF11, MAF,RACGAP1, CDK1, FOSL2,IL12RB2, ZFY, SPAG5, FBXO5, KIF23, QPCT, CDC25A, ADH1B, PDP1, CTH, TFAM
BENPORATH_ES_CORE_NINE_CORRELATED	0.473137	1.81432	0	0.0135087	100	95	SOX11, SAP30, POLR1E, E2F1, EN1, ETV6, YEATS2, MYBL2, TLE1, TCF7L1, SOX9, ELF4, SSRP1, LMO4,MYBBP1A, RUNX3, BCL11A, KLF5, VGLL4, PNRC1, CEBPB, TEAD4, WWTR1, FOXM1, DEK, NFIB, HMGB2, MDFI, SUPT5H, TRIP13, CBFB, NFE2L3, ATF4, MSL3, ILF3, EZH2, WDHD1, MYC,GATAD2A, E2F8, MYBL1, CALR, NMI, HSF1, NFIL3, RELB, YBX1, SPIB,HTATIP2, GTF3C2, HDAC2, MLXIP, RBL1, TBPL1, BCL11B, NFKBIE, SOX4, KLF11, ETV7, SRF,…
NAKAMURA_METASTASIS_MODEL_UP	0.541626	1.81343	0.0014184	0.0135242	45	41	COL17A1, MALL, FRMD8, DPCD, ADCY3,SLC16A3, NOB1, FKBP10, GRK5, ACD,PABPC4L, CMTM3, TUBB6, PGK1, AKAP13, GJB3, HCLS1, LAPTM5, FOLH1, STX4, PADI3, PDE10A, HTRA2, FOSL1, KRT13, MEPCE, HS3ST1, HIRIP3, HOXB7, DDX24, DUSP5, HPDL, TYRO3, NTRK2, PDK3, TUBB2A, BLVRA, TOLLIP, GGA2, DUSP3, DYNLL2
MIKKELSEN_MEF_ICP_WITH_H3K4ME3_AND_H3K27ME3	0.585876	1.81379	0.0057389	0.0135298	38	29	MCHR1, YPEL4, NOL3, IDO1, PTPRR, CACNB3, TMEM100, CNTNAP1, KCNJ2,SERPINI1, FRMD4A, ROBO2, SACS, CORO1A, MEIS1, PCSK1, OPCML, PCDH20, SPTSSB, SYT1, NPY1R, ADM2, SOX6, USP44, RNF207, NOL4, MDH1B, PTH2R, TAL2
CORRE_MULTIPLE_MYELOMA_UP	0.497925	1.81297	0	0.0135527	74	62	CDKN2A, MARCH4, CD200, PTPRR, NRXN3, ANGPTL4, MYCT1, SEPT9, SCG2,CSGALNACT1, RNF145, DMD, C15orf48, SLC7A5, ITGA3, SLC24A3, ATXN1, MYO1D, DPP4, COL13A1, TNFSF4, RHOJ, AREG, PDE10A, RGS4, ADAMTS12, ITGA2, EIF4EBP1, SERPINE1, MAFF, PDGFRL, RGS7BP, KCNT2, LMO2, PTGIS, GATA6, SLC25A23, TFPI, FAM43A, TLR4, FAM155A, C2CD4A, ANKRD1, ITIH4, SNX25, FAM167A, PSPH, IL1B, ADAM23, SAMSN1, ALDH1A3, PLAT, CLDN1…
WANG_SMARCE1_TARGETS_UP	0.418251	1.81264	0	0.0135546	280	264	CTHRC1, GAS5, DLX6, CD200, TGFB1, ACAN, INHBB, PCDHB10, PCDH10, GALNT12, PLXND1, PTGFRN, UNC5B, TRIB2, FIBCD1, PGM2L1, TOX2, TGFB2, SIPA1L2, VLDLR, ETV6, FAP, COL8A1, CLEC2B, NLGN4X, LBH, RPL37, GSN,LINC00341, PMP22, JAG1, HMCN1, TGFBI, EPAS1, TMEM2, CASK, COL5A1, TPBG, SMTN, FKBP7, JDP2, PRRX2, PPP1R3B, FN1, CD24, COL1A1, PLD3, TIMP2, ATXN1, GLIPR2, RNASE4, KIAA1462, CD55, MARCKS, ANTXR1, NID1, …
LIEN_BREAST_CARCINOMA_METAPLASTIC_VS_DUCTAL_UP	0.492508	1.81114	0	0.0136972	83	69	FJX1, CSPG4, HAPLN1, ANGPTL4, VIM, HRH1, NT5DC2, ADM, PLOD1, S100A3, LRRC8C, FAM129B, ADORA2B, CTSZ, OCA2, BMP2, FLNA, PLOD2, IL1R2, CALU, GPM6B, MSN, CEBPB, PLAGL1, FAM127A, BCAT1, MYC, HRCT1, ENPP2, S100B, BCL2A1, COL9A1, SRSF12, KIF14, ANKH, FABP5, UPP1,TNFRSF12A, COL27A1, ARNTL2, PTX3, HAS2, GOLT1B, FAM126A, ICAM1, HMOX1, PRNP, IL6, FOXD1, NMT2, PLA2G4A, IGF2BP2, GNAI1, RTEL1, IGF2BP3, PDIA2,…
MARTENS_BOUND_BY_PML_RARA_FUSION	0.407718	1.81126	0	0.0137222	456	414	CDH23, DAPK2, ECE1, TNFRSF4, HPCAL1, C15orf39, RFX2, CCND3, FLNB, RHBDF2, KSR1, SKI, TMEM173, RNF149, NMUR1, PLXND1, CORO2A, FHOD1, TESC, DENND3, GRK5, CACNA1C, MMP9, CELF2, MCAM, ITGA4, IFNAR2, RUNX1, RPS6KA2, TOX2, RPS19, SH3PXD2A, NDRG1, MCM5, RASGRP2, SH3BP2, MEF2D, TOMM20, RSL24D1, B3GNT7, HIVEP3, TAGLN2, LASP1, WNT9A, PTEN, RNF122, RPL24, DDIT4, RAB31, H6PD, LCP2,NME1-NME2, ADORA3, GRK6, SC…
YAMASHITA_LIVER_CANCER_WITH_EPCAM_UP	0.522913	1.8099	0.0013624	0.0138593	53	51	RPL23A, RPS24, RPL6, RPL7A, MDK, TAF1D,HNRNPA1, RPL17, RPS4X, RPS3, MPZL2, TOMM20, RPL31, RPL28, PTPN12, RPL29, RPLP0, RPL35, EIF3F, RPS12, RPS27A, RPL13A, RPS10, RPSA, TTK, RPS3A, RPL9, DSG2, RPS7, SCARB2, DKK1, CPOX, PHF20, GNAS, XK, FMOD, SPTBN1, GNPAT, RPS4Y1, POLR2E, EPCAM, VIL1, TRIM24, AFP, XPO7, PEG3, AHCY, SRPK1, MRPL3, ABHD3, BAMBI
OSMAN_BLADDER_CANCER_DN	0.414282	1.80721	0	0.0142402	406	358	ST8SIA4, CD47,EPB41L4A-AS1, DGKA, GAS5, RPL4, RPL10A, SAP30BP, RPL10, SNHG1, SKI, RPL23A, PML, RPL15, RPS24, RPL38, RPL12, RPL22, RPL14, GLTSCR2, CELF2, PTPRE, RPL7A, TRAF5, RPL19, RPL35A, IKBIP, RPS25, RPL32, RPL3, FBL, TM2D3, RPA1, PRMT2, RASGRP2, RPS4X, RPS3, TUBD1, EBPL, LBH, ISG20, RPL37, RPL28, EEF1G, RPL18A, RPS18, RPL13, RPL29, RPL36, RPL34, RPS11, ERGIC1, RPLP2, ZNF230, RPL24, IDS, SNHG8…
ZHANG_INTERFERON_RESPONSE	0.622011	1.80655	0.0029586	0.0143473	23	22	RTP4, ISG20, IFI44,IFITM1, IFI16,IFITM3, ISG15, IRF9, OAS3, OAS2, MX1, IRF3, IFI27, OASL, SP110, MX2, OAS1, IFIT2, IRF1, IFRD1, STAT1, IFI30
QI_HYPOXIA_TARGETS_OF_HIF1A_AND_FOXA2	0.556891	1.80585	0.0014347	0.0143798	37	36	NGF, FSCN1,SLC16A3, LBH, ITGA5, GPRC5A, KDM3A, COL6A2, FN1, DUSP10,MYBBP1A, PLOD2, MED15, SRM, LSM2, RNF126, ACTN4, HK1, CNOT3, AES, MARK2, ATN1, ZFP57, PPM1G, JUND, FAT1, IP6K2, BCL2L1, CTNND1, CARM1, F2RL1, CITED2,TRPC4AP, PRSS35, MPP2, ABCF2
LI_PROSTATE_CANCER_EPIGENETIC	0.57807	1.80486	0	0.0144931	30	29	CDKN2A, LAMA3, LAMB3, CPA3, CDH13, CAV1, CD44, EDNRB, CCND2, LAMC2, HIC1, DAB2IP, RASSF1, HPSE, DAPK1, CDH1, GSTP1, RARB, MGMT,RARRES1, APC, PTGS2, AR, ESR1, PXMP4, NR1I3, ESR2, VDR, PLAU
KEGG_VIBRIO_CHOLERAE_INFECTION	-0.451201	-1.84419	0	0.014589	56	50	ADCY3, TCIRG1, ARF1, SEC61G, KDELR1, PRKX, ACTG1, PRKACA, SLC12A2, PDIA4, ACTB, PLCG1, GNAS, TJP1, SEC61A1, KDELR2, SEC61B, ATP6AP1, CFTR,ATP6V0A2, KDELR3, PRKCB, ADCY9,ATP6V1G1, SEC61A2, PRKCA,ATP6V1G2,ATP6V1B2,ATP6V0E1,ATP6V0A1,ATP6V1E2, TJP2, KCNQ1, ATP6V0C,ATP6V1G3,ATP6V1B1,ATP6V0D2,ATP6V0A4, ATP6V1F,ATP6V1C1,ATP6V1C2, PLCG2, ATP6V0B,ATP6V1E1,ATP6V0E2, ATP6V1D,ATP6V0D1, ATP6V1H, PRKACB, ATP6V…
WIERENGA_STAT5A_TARGETS_GROUP1	0.453479	1.80363	0	0.0146425	136	122	KISS1R, SPAG4, FGF11, PFKFB4, TNFRSF4, KRBA1, IL3RA, HSPA6, IL4R, PLEKHA4, PLVAP, ADM, NDRG1, ENC1, TRIM46,LINC00341, CTXN1, PLXNA3, CERCAM, MEX3D, DDIT4, FAM129B, ARL4A, CTSZ, PHLDA1, TRIB3, STK17B, BATF3, PPFIA4, CALB2, CBS, IL4I1, MUC1, SLC6A9, NAALADL1, NOD1, FNDC3B, RHEBL1, CCDC102A, MAP1A, CD1A, A4GALT, MOSPD3, IGFBP5, P4HA2, SMAP2, P2RX4, ITGA2, CST7, XIRP1, GBP4, CPXM1, FAM131A, SEMA6C, T…
RUTELLA_RESPONSE_TO_HGF_DN	0.419038	1.80007	0	0.0152194	235	229	CD300A, EGLN3, ZNF395, PTP4A3, CRIP1, IER5, CCNI, SEPT9, PPM1F, RPL22, ALOX5, DENND3, CELF2, PECAM1, TRAF5, ITGA4, MEF2C, CSNK1E, HNRNPA1, RASGRP2, CXCR4, HOMER2, STS, CYTH1, DAPP1, MAP4K4, RPL28, MAP3K6, DDIT4, ZHX2, NINJ2, KIAA0922, RNASET2, MED13L, IGFBP7, SLC2A3, ARHGEF6, CASP1, ICAM2, ETS2, LRRK1, NEDD9, RUNX3, ADAM19, MARCKSL1, LTA4H, NARF, STK17B, DPYSL2, IFITM2, RNASE4, BATF3, CD55, FYN, …
GRAHAM_NORMAL_QUIESCENT_VS_NORMAL_DIVIDING_DN	0.472644	1.79904	0	0.0153397	87	86	PRG2, DTL, CPA3, GINS2, MCM5, CDC45,RNASEH2A, PRC1, TYMS, SLC7A5, CDC6,KIAA0101, MCM10, MCM2, NCAPG, MELK, POLE2, CKS1B, CCNB2, NDC80, RFC4, CSF2RB, CCNE2, MCM6, CENPM, KIF18B, GZMB, DLGAP5, CEP55, NUP85, CCNA2, RRM2, TOP2A, TRIP13, BIRC5, DSCC1, VRK1, FEN1, KIF15, BUB1, MAD2L1, NUSAP1, KIF2C, OIP5, MSH2, RRM1, BUB1B, CDC20,RAD51AP1, CDKN3, XK, FABP5, ZWINT, CD36, PCNA, RFC3, TK1, CHEK1, HBB, DUT…
CHARAFE_BREAST_CANCER_LUMINAL_VS_BASAL_DN	0.406968	1.79743	0	0.0155356	455	422	KRT17, GJC1, DUOX1, TGFA, KRT15, AMD1, IRS2, LAMA3, DGKA, LOXL2, IL1RAP, PRKCDBP, SFN, LAMB3, FSCN1, FXYD5, TMEM173, PTPRM, NOB1, HRH1, RNF145, DMD, ANXA2, CASP4, CAV2, ETS1, CDH13, BMP1, ANXA2P2, TOX2, COL4A1, ADM, COL4A2, ANXA4, FAP, GM2A, COL8A1, NXN, CAV1, CSNK2A2, NNMT, LBH, ITGB1, C10orf10, MAP4K4, PTRF, CYB5R3, JAG1, CDCP1, ANXA1, MYO1E, TUBB6, TGFBI,TNFRSF10D, SLC16A1, FKBP1A, ELK3, PELO,…
PID_INTEGRIN3_PATHWAY	0.528419	1.79667	0.0014085	0.0156469	43	43	CD47, IBSP, VEGFA, LAMA4,PECAM1,COL4A1, SDC1, TGFBI, LAMC1, PLAUR,PDGFRB, FN1,COL1A2,COL1A1, KDR, PDGFB, SPHK1, FBN1, EDIL3,TGFBR2, THY1, TNC, HMGB1, F11R, SDC4, CYR61, ITGB3, L1CAM, THBS1, PVR, VTN,ITGA2B, FGG, FGB, ITGAV, FGA, SPP1,COL4A5,COL4A6, PLAU, LAMB1,COL4A4,COL4A3
WESTON_VEGFA_TARGETS_6HR	0.50962	1.79494	0.002649	0.0158911	59	53	RGS5, FHL3, IGFBP3, GJA4, SGCE, VIM, FAP, NNMT, ROR2, COL5A1, BGN,ADORA2B, BDNF, COL1A2, COL6A1, NID2, VCAN, MGP, SP3, RHOB, ELN, MMP2, POSTN, COL6A3, SLC6A8, OXTR, GEM, KRT18, SAT1, ART4, THY1, TFPI2, C1S, SEMA5A, HTR2B, ANKRD1, SDC4, CFHR1, BCKDHA, F2RL1, GSTT1, MEST, CCL2, UNG, BMP4, ESR1, PVALB,TNFSF10, VCAM1, DIRC2, AQP7, FBP1, PRKAB1
LIU_VAV3_PROSTATE_CARCINOGENESIS_UP	0.472655	1.7944	0	0.0159499	89	84	AMD1, IBSP, LGALS3, ARHGDIB, PLA2G7, GPNMB, CD1D,SERPINA3, GBP2, SFTPD, CDKN2C, EDNRB, KRT7, CASP1, FN1, CCND2, TIMP2, ITGB2, NID1, CTSK, PLOD2, TYROBP, FCER1G, WFDC2, TAP1, PSMB8, PLA2G16, LTBP2, MMP7, C3,SERPINB1, NOV, C1QA, ACTC1, PSMB10, LILRB3, LTC4S, PSMB9,TNFSF13B, BCL2A1, CTSS, FUS, TGM2, HDAC9, CFH, SAT1, CD36, TGFBR2, LTF, CYBB, IFIT3, TNC, ADIPOQ, CD74, TLR2, ITGB6, TIMP4, ARG1, RNASEL…
HUMMERICH_SKIN_CANCER_PROGRESSION_UP	0.469863	1.79392	0.0012903	0.0159797	88	85	RIN1, IL4R, SSPN, MMP9, ITGB4, PECAM1, COL5A2, LGALS9, KRT19, ITGB1, ITGA5, CRABP2, PRKCSH, CD44, PGK1, MMP14, CASP1, PYCARD, COL1A2, CTSD, COL1A1, IFITM3, PERP, IL17RA, THBS2, COL18A1, THOP1, SAA1, MIF, MMP13, ENO1, S100A6, CASP8, COL7A1, ADAM8, SERPINB1, TNFRSF1A, CDKN1A, COL6A3, MYC, BCL10, CPXM1, NCF2, CCNF, DOK2, TACSTD2, CYBA, RBMS1,TNFRSF12A, JUNB, MT1A, RHOC, HLA-DQB1, BLMH, SMAD1, OSBPL1…
REACTOME_SIGNALING_BY_FGFR1_MUTANTS	-0.535771	-1.83279	0	0.0160315	30	23	PLCG1, GAB2, STAT3, MYO18A, STAT5B, FGFR1, CPSF6, PIK3CA, CNTRL, FGF2, FGF1, TRIM24, FGF5, STAT1, FGF9, PIK3R1, CUX1, ZMYM2,FGFR1OP2, GRB2, BCR, STAT5A, FGFR1OP
VERRECCHIA_RESPONSE_TO_TGFB1_C5	0.622358	1.79181	0.0062402	0.0162205	21	20	MMP11, ITGA4, EFNA5, ARHGAP1, ITGA5, SEMA3F, CTNNB1, DDR1, ILK, MMP2,TNFRSF1A, ITGB8, EPHA2, FGD1, CTNNA1, DVL3, NME4, ITGB3, RHOD, SMO
LI_INDUCED_T_TO_NATURAL_KILLER_UP	0.412274	1.79187	0	0.0162633	307	293	B4GALNT4, DAPK2, PRELID2, CDKN2A, HK2, DYRK3, VASH1, LGALS3, PKP3, SYTL2, FXYD5, PLP2, CDKN2B, KHNYN, HVCN1, GCNT1, VIM, DENND3, ANXA2, MED10, NRGN, FAM46A, ZNF608, CHSY1, ZNF296, PRDX4, PRMT2, EMILIN2, SH3BP2, GDPD5, LGALS1, FES, LGALS3BP, KCTD10, C15orf48, MYO1E, TUBB6, LASP1, LRRC8C, CLDND1, LMNA, ARAP3, FAM129B, P2RY14, MLKL, PEA15, RAB4A, CASP1, ROM1, DEGS1, IFITM1, PDGFA, CCND2, LRRK1, SLC2…
RADAEVA_RESPONSE_TO_IFNA1_UP	0.511569	1.79067	0.002635	0.0163271	52	52	RFC2, BST2,LGALS3BP, BAX, IFI44, IFI44L, BRCA1, IFITM1, TUBB, IFITM3, IFITM2, HLA-E, IFI6, ISG15, E2F2, UBE2L6, IRF7, MXD4, MX1, IFI27, RSAD2, CASP3, CALR, BCL2, CDKN1B, HLA-C, PLSCR1, PRKCQ, MX2, CASP7, CXCL11, OAS1, IFI35, PIAS4, CXCL10, IFIT2, PSME1, RRP8, IFIT1, IRF1, KLK3, IL12RB2, SOCS1, UBE2D3, EIF2AK2, NTRK1, TNFSF10, PHB, STAT1, VCAM1, ADAR,CYB561D2
BEGUM_TARGETS_OF_PAX3_FOXO1_FUSION_DN	0.521536	1.79073	0	0.0163664	45	45	PDLIM4, DGKD, FLNB, VEGFA, JAG2, GCNT1, ITGB4, BMP1, LBH, COL5A1, SOX9, DKK3, ITGA3, THBS2, NTM, MYC, SERPINE1, EPHA2, CARD10, CFD, TIMP3,TNFRSF12A, CD70, AJAP1, MAFB, KLF10, TNC, BCL2L1, ID1, SMAD9, STEAP3, F2RL1, SH3BP4, IL11, SEMA3B, WNT11, KCNG1, BMP4, EPHB2, GADD45B, CPEB1, BIN1, VDR, TPD52L1, KIT
PID_RB_1PATHWAY	0.507692	1.78903	0	0.0165741	65	59	CDKN2A, CCND1, CCND3, E2F1, MEF2C, AATF, TGFB2, CDK2,SUV39H1, SFTPD, CCND2, RB1, MET, CDK6, E2F2, CEBPB, MDM2, MAPK11, CCNA2, SPI1, ATF7, RUNX2, ELF1, CDKN1A,PPP2R3B,SMARCB1, CDK4, CDKN1B, SIRT1, JUN, ABL1, CREBBP, CTBP1, MITF, CEBPD, HDAC1, SKP2, HDAC3, DNMT1, EP300, TBP, BRD2, RBBP4, UBTF, CCNE1, BGLAP, TAF1, CBX4, CEBPA, TFDP1, E2F3, E2F4, MAPK9, PPP2CA, ATF2,SMARCA4, MAPK14, RAF1, PPARG
REACTOME_PRE_NOTCH_TRANSCRIPTION_AND_TRANSLATION	0.606788	1.78832	0.0014577	0.0166329	29	23	CCND1,NOTCH3, E2F1, TP53,NOTCH4, MAML3, SNW1, RBPJ, MAML1,NOTCH2, JUN, MAML2,CREBBP,MAMLD1, EP300,TNRC6C, KAT2A,TNRC6B, TFDP1, E2F3,TNRC6A, KAT2B, MOV10
MIKKELSEN_MEF_LCP_WITH_H3K4ME3	0.460363	1.78793	0	0.0166423	128	108	ECSCR, CP, TRIM21, ARHGDIB, GAL3ST4, TREX1, CASP4, GPSM3, LGALS9, CPA6, C1QTNF6, LSP1, NNMT,LGALS3BP, WISP2, ANXA1, TBXA2R, PDGFRB, XDH, GPR173, PCOLCE, C1orf54, OLFML1, DAPK3, INHBA, AKNA, COL6A1, ACTG2, DDR1,SERPINB8,SERPINB9, COL3A1, MMP19, EMP3, LDB3, ECM1,PRICKLE3, XAF1, DAB2IP,TNKS1BP1, POSTN, ELOVL1, AMPD3, IKBKE, ANGPTL2, CCDC9, CYP2J2, ZNF583, MAB21L3, RUFY4, MASP1, MYO7A, RAB43, EMILIN1…
SHETH_LIVER_CANCER_VS_TXNIP_LOSS_PAM4	-0.336367	-1.82583	0	0.0169456	261	228	LECT1, RGS5, IL1RAP, ATP11A, CALCRL, TRAF3IP2, TTYH1, EDNRA, CD1D, NDN, PDK1, CELF2, NGFR, EFEMP1, TGFB3, TGFBI, ADAMDEC1, MUSTN1, TIMM9, MCM10, FZD9, CBS, N4BP2L1, TBC1D8, PDE9A, CTNNBL1, DDX49, ABI3BP, IGFBP5, KCNQ5, CUTC, SPDEF, GDF10, ZEB2, SERPINB1, CWC15, ST5, CCNF, SUFU, MKRN1, GPX1, MASP1, AKR1D1, TMEM63A, DDX60, CD3E, CD163, CCR5, CA3, DLEU2, GDI2, ACYP1, CLEC3B, TK1, RECK, CLEC4F, ZNF35…
KEGG_GLYCINE_SERINE_AND_THREONINE_METABOLISM	-0.505382	-1.82411	0	0.0169722	31	31	SDS, CBS, SHMT2, AOC3, AOC2, ALAS2, CHDH, PSPH, SARDH, PHGDH, DAO, AGXT2, PIPOX, MAOB, AGXT, GAMT,GLYCTK, PSAT1, BHMT, GCAT, GNMT, SRR, GATM, AMT, CTH, GLDC, SHMT1, DMGDH, ALAS1, DLD, MAOA
RUTELLA_RESPONSE_TO_HGF_VS_CSF2RB_AND_IL4_DN	0.41594	1.7857	0	0.0170258	245	236	DUOX1, EGLN3, TNFRSF4, PTP4A3, CRIP1, IER5, MREG, CCNI, FSCN1, RAB38, NETO2, PPM1F, RPL22, ARHGAP22, CELF2, TRAF5, ANXA2, ITGA4, RUNX1, RASGRP3, ANXA2P2, CSNK1E, HNRNPA1, MCM5, RASGRP2, CXCR4, HOMER2, CYTH1, DAPP1, MAP4K4, RPL28, JAG1, MAP3K6, RFTN1, ZHX2, KIAA0922, LMBR1L, IL21R, MED13L, ARHGEF6, PLXNA1, FAM129A, LRRK1, RUNX3, ADAM19, MARCKSL1, NARF, STK17B, DPYSL2, SPRED2, RAB8B, RNASE4, BATF3,…
PID_P53_REGULATION_PATHWAY	0.496943	1.78478	0	0.0171558	59	57	CDKN2A, SMYD2,PPP1R13L, RPL11, RPL5, CSNK1E, TP53, CDK2,TP53AIP1, RPL23, PPM1D, DAXX, TRIM28, SETD7, DYRK2, AKT1, MDM2, CCNA2, KAT5, RASSF1, CSNK1A1, YY1, CHEK2, ABL1, CREBBP, CSNK1G1, CSNK1G3, PIN1, KAT8, CHEK1, CCNG1, SKP2, CSNK1G2, GSK3B, E4F1, EP300, CSNK1D, MDM4, TTC5, USP7, PRMT5, RFWD2, ATM, RCHY1, FBXO11, NEDD8, UBE2D1, MAPK9, CSE1L, PPP2CA, HUWE1, PRKCD, HIPK2, KAT2B, MAPK14, ATR, MAPK8
RODRIGUES_THYROID_CARCINOMA_DN	0.469879	1.78344	0.0013141	0.0173025	77	74	MAP2, SYTL2,PPP1R13L, SNHG12, DMD, RIT1, PTPRK, EFNA5, PMEPA1, ARHGEF7, COL8A1, BBC3, PLEC, CD44,ARHGAP29, FN1, KCNMA1, DUSP10, ATXN1, MYO1D, GMEB2, ROBO1, CDK6, SAMD9, ZNF160, CLDN1, ALCAM, AREG, AMIGO2, DCBLD2, S100A10, ITGB8, RNF213, THBD, ANKRD10, F2RL2, SHANK2, CXCL1, PLCB1, SRGN, CREB5, LIF, UGCG, QKI, MORF4L2, ZNF207, HIVEP2, RSF1, L3MBTL1, SLIT2, ANKRD28, IGF2BP2, TRA2A, NAMPT, IRF1, S100…
XU_HGF_SIGNALING_NOT_VIA_AKT1_48HR_UP	0.548807	1.78368	0.004386	0.0173058	35	34	ECE1, HPCAL1, GRK5, ISG20, CDCP1, ITPR3, CD44, TIMP1, CDK17, PHLDA1,ST6GALNAC4, RIN2, FYN, CCL20, ITPKA, CARS, ERCC1, UPP1, STC1, FHL1, ASNS, SLC4A7, HMOX1, LTB, MACF1, MMP1, MAP4K2, HMGA1, AKAP12, PCK2, PLAU, PPP1R1A, UAP1, ARG2
NAKAMURA_ADIPOGENESIS_LATE_DN	0.539094	1.78246	0.0043165	0.0174166	38	37	IGFBP3, HAPLN1, TMEM47, TPM1, SLC7A5, DKK3, ITGA3, LOX, COL15A1, ACTG2, THBS2, LRP3, ABI3BP, ZNF133, MYH11, EDIL3, HCK, POSTN, GLIPR1, CALD1,SERPINE1, NT5E, TIMP3, RAI14, IL6, CYR61, IER2, AIMP1, PDE6D, EPOR, SRPK2,SERPINE2, ITGAV, SMAD3, COL9A3, GDF15, CXCL12
QI_PLASMACYTOMA_UP	0.416177	1.78026	0	0.0177743	259	244	CD47, SOX11, CD40, TGFB1, FSCN1, TRIM21, ARHGDIB, IL4R, SLC43A3, CASP4, GPSM3, LGALS9, RASSF2, SH3BP2, TNFSF11, LSP1, DOK1, DAPP1, ITGB1, PLEC, LASP1, PCSK6, TMSB10, STK10, AXL, BDKRB2, STK39, GNG10, IL21R, RNASE1, SWAP70, CASP1, CD24, PLEKHO1, NFAM1, STK17B, ITGB2, ADCY7, MARCKS, MYB, DPP4, HCLS1, GNG11, GNB4, PDLIM7, UBE2D2, RB1, IL1R2, IL18BP, ACTG2, ABI3, SP100, CLU, UBASH3B, IL2RB, CARD11, F…
BROWNE_HCMV_INFECTION_2HR_DN	0.519531	1.77946	0.0013495	0.0178587	49	46	PTPRR, ANXA2, KRT19, TCP11L1, PLAUR, AXL, UBE2C, PHLDA1, ITGA3, TPM2, COL13A1, RAD23A, CENPF, IGFBP5, BIRC5, TTC9, MYC, CYP2J2, ITGA2, CENPA,SERPINE1, PRIM2, CDKN1B, ITGA6, TK1, SNAI2,CDC42EP2, LPXN, CENPE, ABCC1, DGKE, SGK1, NPTX1, IFIT2,HIST1H1C, MMP3, YLPM1, F3, PAK2, ERCC6, DST, KIF23, MUC4, DUSP6, STIP1, GCDH
LEE_TARGETS_OF_PTCH1_AND_SUFU_UP	0.517858	1.7791	0.0041152	0.0178606	53	46	HK2, CCND1, IER5, GLI2, GPNMB, CDCA7, RPL23, SOX18, MCM2, CCND2, CKLF, GLI1, IRS1, AKNA, PLEKHO2, CDK6, PTCH2, MCM6, MICAL1, RND3, PPAN, MTHFD2, C1QA, B2M, C1QB,EIF4EBP1, POLE, CTSS, SUFU,RAD51AP1, MAGOHB, DDR2, LRIG3, SDPR, TSHZ2,HLA-DQA1,KIAA0556, SSTR2, FRMD4B, MAP2K6, MYCN, SOCS2, FZD2, LAP3, SFRP1, HSD11B2
MEISSNER_NPC_HCP_WITH_H3K4ME2	0.397934	1.77853	0	0.017893	491	427	NMB, HTR6, SLC1A6, DAPK2, PTHLH, RIMKLA, PLXDC1, NPTX2, PGF, ELOVL2, GRHL3, MARCH4, ADRA1B, LHX9, C3orf67, FCHO1, COL23A1, GIPC3, RFX2, LOXL2, SLC27A3, EBF2, ARHGEF25, VWA1, ADCY3, OLFML2B, GALNT12, COPZ2, DIRAS2, DYSF, RAMP2, IL4R, HRH1, LSR, PTPRE, ANXA2, MATK, GRIN2D, PDLIM1, CD248, TPM1, AATK, MTUS2, C2CD4C, EMILIN2, TNFSF11, CREG2, SEMA4B, DLX4, SEMA3F, PLD2, ROR2, TAGLN2, SLC4A3, ITPR3, CPX…
KEGG_LYSINE_DEGRADATION	-0.442984	-1.81614	0.0034247	0.0180747	44	41	PLOD1, SETDB1, PLOD3, SUV39H1, SETD7, PLOD2, EHMT1, EHMT2, SETD1A, WHSC1L1, SETD1B, NSD1, WHSC1, ASH1L, SUV39H2, PIPOX, DOT1L, BBOX1, SETMAR, TMLHE, SETD2, ALDH1B1, GCDH,AASDHPPT, AASS, ALDH2, OGDH, ALDH7A1, AASDH, ACAT2, HADHA, DLST, ECHS1, SETDB2, AADAT, EHHADH, ALDH3A2, OGDHL, HADH, ALDH9A1, ACAT1
TIEN_INTESTINE_PROBIOTICS_2HR_UP	0.573589	1.77692	0.0030488	0.0182278	27	27	NAP1L1, GAPDH, UBC, RPL23, RPS11, PGK1,ST6GALNAC4, RPS6, KDELR1, KLF5, LRP5, RPS3A, EEF1A1, PTK2, B2M, EPHB4, TPT1, LRRFIP1, ANP32A, EIF5A, SEL1L3, MMP24, PTP4A2, CA12, CYP1A1, FAM120A, HSPA8
SENESE_HDAC1_AND_HDAC2_TARGETS_DN	0.418331	1.77594	0	0.0182297	232	209	KRT81, KRT17, SYTL1, KRT15, C5orf46, ZNF395, LAMB2, SFTA1P, GXYLT2, SYT12, NRXN3, PRR16, TMEM45A, HAPLN1, GLI2, SYTL2, GPNMB, EBF1, ALOX5, CELF2, TRIB2, COL5A2, PDLIM1, TCF4, TPM1, TGFB2, STAC, TMEM100, CAV1, TCP11L1, LBH, SDC1, F8, CNRIP1, TUBA1A, KIAA0922, ZAK, CDKN2C, IGFBP7, FSTL1, ITGBL1, RIN3, COL1A1, PCOLCE, CALB2, LOX, GPX8, SCEL, MGAT5B, ZNF219, CPA4, ABCC3, UNKL, SYNPO, CLU, SCARA3, RTK…
JECHLINGER_EPITHELIAL_TO_MESENCHYMAL_TRANSITION_UP	0.486712	1.77597	0	0.0182865	71	68	PTHLH, PLA2G7, VIM,SERPINH1, VLDLR, SDC1, PMP22, COL6A2, HSPG2, SPARC, PDGFRB, RNASET2, CTSZ, PROCR, PCOLCE, IFITM3, INHBA, ADA, COL6A1, ISG15, RRAS, SNAI1, COL3A1, IRF7, SRM, MMP13, MMP2, MTHFD2, B2M, CD68, PTPN22, PPIC, HTRA1, SLPI, GBP4, CXCL6, CYP1B1, DDR2, CFH, CXCL1, CDH15, UPP1, MMP12, TNXB, IFIT3, TNC, PTGS1, ASNS, ADSSL1, BCL3, SDC2, S100A8, IFIT1, CTSB, CCL2, PHGDH, IL11, SLC3A2, FMO1, …
BERTUCCI_MEDULLARY_VS_DUCTAL_BREAST_CANCER_DN	0.427679	1.77606	0	0.0183233	169	161	ANO1, EPHA3, PDGFD, EFNA3, CTNND2, PLSCR3, RGS5, TGFB1I1, H19, COPZ2, EDNRA, FKBP9, RIT1, RUNX1, OBSL1, SH3PXD2A, FAP, COL8A1, CD81, CAV1, PTRF, KCNMB1, DACT3, LGALSL, SLC4A3, HSPG2, SMTN, SLIT3, BGN, PDE5A, KANK2, FSTL1, SPRED2, FLNA, ACTN1, MRVI1, PERP, TPM2, ACTG2, ACTA2, STARD13, MPRIP, CNPY4, MSRB3, UACA, AHNAK, PARVA, MAPK7, GPC1, ADAM12, DLC1, MDFI, MYH9, ENDOD1, MYL9, TAGLN, FBXO32, ITGB5…
KEGG_HYPERTROPHIC_CARDIOMYOPATHY_HCM	0.48469	1.77434	0.0013055	0.0185593	85	68	CACNB1, TGFB1, CACNB3, CACNA1F, CACNA1C, DMD, ITGB4, ITGA4, SGCA, TPM1, TGFB2, ITGB1, ITGA5, TGFB3, ITGA7, LMNA, CACNA1D, TPM3, ITGA3, ITGA10, TPM2, ITGA1, ACE, ATP2A2,CACNA2D4, ITGB5, CACNG4, ACTC1, SGCB, ITGB8, TPM4, ITGA2, ACTG1, ACTB, EMD, ITGA6, TNF, ITGA8, ITGA9, ITGA11, TTN, CACNB2, DES, SGCD, IL6, ITGB6, ITGB3, MYL3, DAG1, RYR2, IGF1, LAMA2,CACNA2D1, PRKAA1, ITGB7, ITGA2B, SLC8A1, PRKAB2,…
VECCHI_GASTRIC_CANCER_EARLY_UP	0.398238	1.77195	0	0.0189555	430	390	MYEOV, NMU, CRIP1, LAMA3, GAS5, MACC1, ATP11A, H19, HN1L, NPM1, MCF2L, DTL, CDCA7, MCM7, ANLN, UHRF1, KIF4A, PFKP, CXCL5, MRTO4, RUNX1, CENPH, AATF, GINS2, TPM1, PMEPA1, MCM5, TFAP2A, SEMA4B, GPRC5A, MYBL2, CDR2L, CENPK, ATG16L1, PRC1, CSPG5, SMARCE1, TM4SF1, MTHFD1L, MYOF, BRCA1, EFNA4, KRT7, ADORA2B, FANCI, CDC6, UBE2C, KIAA0101, MCM10, CDH3, CLDN3, IFITM1, MCM2, SFR1, RPL8, IFITM3, NCAPG, IFIT…
GERHOLD_ADIPOGENESIS_DN	0.492227	1.77209	0	0.0189973	64	61	CCND1, IL4R, ANXA2, CD81, ITGB1, SDC1, TUBA1A, BAX, CD44, PDGFRB, MMP14, XDH, EEF2, FN1, CCND2, TUBB, BID, CDC37, ANXA5, THBS2, VCAN, GAS6, CASP8, ECM1, SAMHD1, CDK4, THBD, CD9, ANXA3, AKR1B1, ZNF148, CEBPD, SOX4, EIF3C, SAE1, IL1R1, UCP2, IER3, UBTF, CTGF, CYR61, GAS7, DNAJB1, FGF7, THBS1, CCT5, IFRD1, PDCD2,TNFAIP2, IL11RA, CCL2, ATF1, PLAT, DDB1, CRYAB, GAS1, G0S2, CCT2, VDR, HSPA8, CXCL12
PUJANA_BREAST_CANCER_WITH_BRCA1_MUTATED_UP	0.504058	1.76982	0	0.0191053	56	55	SNRPA, RPA1, MCM5, MYBL2, CDKN2C, NCK1, MCM2, BLM, TOPBP1, CEP57, NDC80, RFC4, AURKB, MCM6, FOXM1, DEK, NASP, EXOSC8, USP1, ILF3, EZH2, MTF2, CDC7, CENPA, RAD54L, MSH2, CDC20,RAD51AP1, NCAPD2, SMC4, TCERG1, CAD, RFC3, MRE11A, HMGN4, RPIA, SKP2, SH2D1A, DNMT1, HMMR, AURKA, MCM4, PNN, CDK1, UBE2S, LBR, KATNA1, TFDP1, DDX39A, DNA2, STMN1, SRSF10, ASF1A, TTF2, SRSF11
REACTOME_TRANSPORT_TO_THE_GOLGI_AND_SUBSEQUENT_MODIFICATION	-0.492241	-1.80834	0.0098039	0.0191319	33	31	SEC24D, MGAT3, MGAT2,B4GALT2, MGAT1, SEC23A, MCFD2, LMAN1, SEC31A,B4GALT3,B4GALT5, SEC24B, MGAT4B, FUT8, SEC24C,B4GALT1, SEC13,B4GALT4,ST6GAL1, MAN1A2, MGAT5, MANEA, MAN2A1,ST8SIA6,ST8SIA2, PREB, SAR1B, MGAT4A, MAN1C1,B4GALT6, MAN1A1
GRAHAM_CML_DIVIDING_VS_NORMAL_QUIESCENT_DN	0.45876	1.77005	0	0.0191337	95	91	HLX, TGFB1I1, CD40, CD200, ALOX5, DMD, TCF4, CLEC2B, MPZL2, RPL31, ERG, GUCY1A3, GBP2, IDS, TPBG, CD44, TM4SF1, TRIM22, IFI16, BCL11A, INHBA, ANXA5, CCNG2, TCF7L2, HLF, LIMCH1, EMP1, TNFSF4, BIRC3, RBPMS, CXCL3, AREG, ADAM8, PPFIBP1, SORL1, TSPAN31, GLIPR1, SVIL, CXCL6, EVI2A, FNBP1, CTSO, CXCL1, CXCL2, PMCH, HLA-DPA1, CXCL11, HLA-DQB1, VNN1, CXCL13, ADAM28, RABGAP1, PTPRC, ENPP4, TFPI, SH3BP5, C…
AMUNDSON_POOR_SURVIVAL_AFTER_GAMMA_RADIATION_8G	0.461029	1.77063	0.0012484	0.0191734	95	92	GJC1, CCND1, OAZ2, LAMB2, INPP5D, LOXL2, SYDE1, ARHGEF17, GMFG, PLK2, BMP1, TFAP2A, PMP22, DENND5A, LHFP, LAMC1, TPBG, CD44, NINJ2, MFNG, SWAP70, GAS2L1, MYB, HCLS1, ANXA5, VAMP3, CDK6, LAPTM5, WWTR1, NFIB, TSPAN4, KIF21B, PRKX, IGSF3, ELF1, GTF3A, FAM114A1, ARHGAP4, CD53, NCKAP1L, CST7, CKAP4, DEF6, RHOH, FXR1, CORO1A, ABI2, SSBP1, SH2D2A, LCP1,TNFRSF12A, TULP3, MAX, PTPRC, SGK1, PSD4, CAMSAP2, …
RIZ_ERYTHROID_DIFFERENTIATION	0.480115	1.77046	0	0.0191778	77	70	E2F1, MCM7, MID1, UHRF1, KIF4A, PIAS2, MCM5, MYBL2,SMARCE1, ELF4, PIAS3, BRCA1, NFIX, MCM2, BLM, BMI1, POLE2, TRIM27, PBX2, EXO1, AURKB, SP3, HMGB2, TOP2A, CENPB, FEN1, ZBTB17, EZH2, POU2F3, CBX3, POLA1, HSF1, CENPA, POLD1, POLG2, MCM3, RBL1, RXRA, POU2F1, TERF2, HMGB1, MAX, DNMT1, STAT5B, MCM4, ARNTL,ANKRD49, ID1, CTCF, MAFG, NFYC, POLR2J, TFDP1, FOSL2, PER3, ATF1, DHX9, PLA2G6, NFYB, SMAD6, CLO…
REACTOME_NCAM1_INTERACTIONS	0.573186	1.77009	0.0014749	0.0191788	39	30	ST8SIA4, CACNB1, ARTN, CACNB3, COL5A2, COL4A1, COL4A2, COL6A2, AGRN, COL5A1, COL1A2, COL1A1, COL6A1,CACNA1H, COL3A1, COL6A3, COL9A1, CACNB2, GFRA2, PRNP, NCAM1, COL9A3, COL9A2, COL4A5, GFRA1, CACNB4,ST8SIA2, NRTN, COL4A4, COL4A3
BAUS_TFF2_TARGETS_UP	0.577975	1.76897	0.0057637	0.0192572	32	27	CRIP1, DGKA, GNB1, OGFR, ZEB1, ADA, TAP1, PSMB8, IRF7, ABCG2,PTPN22,SAMHD1, PSMB9,KDELR2,GUCA2B, GLO1, APOC2, LTB, MS4A1, IFIT1, TFF3, APOA4, GGT1,SLC2A2, DPEP1, BCAT2, ITLN1
REACTOME_SYNTHESIS_OF_BILE_ACIDS_AND_BILE_SALTS	-0.571931	-1.80855	0.01983	0.0192576	19	17	AKR1D1, HSD3B7, CYP8B1, CH25H,CYP46A1,CYP27A1, BAAT, ACOX2,SLC27A5,SLC27A2,CYP39A1, AKR1C4, CYP7B1, ACOT8, AMACR, SCP2,HSD17B4
SONG_TARGETS_OF_IE86_CMV_PROTEIN	0.497999	1.76803	0.003871	0.0194213	60	59	RFC2, CDT1, E2F1, MCM7, RPA1, MCM5, MYBL2, PSMC3IP, TYMS, CSPG5,KIAA0101, MCM2, BLM, TOPBP1, DNAJC9, PTTG1, RFC4, MCM6, TPX2, FOXM1, HMGB2, NASP, FEN1, EZH2, CASP3, MAD2L1, BARD1, POLA1, DLEU1, H2AFX, MSH2, RRM1, UMPS, MCM3, DDX23, PPIH, FADS3, ZWINT, PCNA, RFC3, TK1, SLC29A1, KIF11, RAB27A, RAD51C, DCK, NUP214, CDK1, CCNE1, POLD3, TMPO, BTG3, UNG, DHFR,TMEM106C, DDX52, FLAD1, TFAM, PNP
SHIN_B_CELL_LYMPHOMA_CLUSTER_7	0.568117	1.76314	0.006079	0.0203866	27	26	NOTCH3, GLI2, PML,NOTCH4, RARG, PTEN, RB1, STAT6, BCL6, XRCC3, IGF1R, DVL1, MAX, GSK3B, BAD, ZFP36, DVL3, APC, TERT, IL6ST, PTCH1,CDKN1C, WNT4, TRAF4, TEP1,DICER1
LEE_NEURAL_CREST_STEM_CELL_UP	0.442333	1.76273	0	0.0204162	146	127	LZTS1, RASL12, STMN2, HAPLN1, EDNRA, TMEM204, ITGA4, MEF2C, MSX1, FAP, ENC1, NGFR, TFAP2A, LGALS1, GSN, PMP22, CRABP2, ANXA1, TGFBI, SHC1, ELK3, LPAR6, BGN, NRP2, GAP43, IGFBP7, PHLDA1, COL1A2, ATP1A2, FAM89B, IFI16, NEFL, XIST,SERPINB9, GRN, NNAT, COL3A1, NR2F1, AP1S2, ARHGDIA, DLC1, RHOB, MDFI, IGFBP5, ALCAM, GYPC, GNRH1,SH3BGRL3, SCRG1, S100A11, ZEB2, ARL6IP5, POSTN, S100A10, CNR1, TRIM62, SNA…
CHIARADONNA_NEOPLASTIC_TRANSFORMATION_KRAS_CDC25_UP	0.49839	1.76318	0.0039735	0.0204476	58	54	CCND1, FXYD5, GJA1, PLP2, GAPDH, RAD51, TGFBI,KIAA0101, PDGFA, KCNN4, TES, TSPO, CSRP2, WWTR1, GPC1, VAMP5, AREG, CASP3, CDKN1A, ANGPTL2, APCDD1, CD9, EVI2A, EIF2S1, ITGA6, HMGA2, ANKH, UPP1, ZNF706, PQLC3, SEMA7A, RGS16, LAPTM4B, FUT8, SEMA5A, POLD4, C9orf16,SERPINA1, SSNA1, CYTIP, PMF1, ACOT7, RASA1, CRABP1, CAPG, PSMB5, ITGB7, KITLG, SPTSSA, NGEF, NUPR1, SPP1, RAB7A, GADD45A
PID_PRL_SIGNALING_EVENTS_PATHWAY	0.59452	1.76345	0.0076453	0.0204504	23	23	PTP4A3, ITGB1, CDK2, MAPK3, TUBA1B, RAC1,RABGGTA, ITGA1, RHOA, CCNA2, CDKN1A, ROCK1, RHOC, EGR1, CCNE1, BCAR1, AGT, SRC, ATF5,RABGGTB, MAPK1, PTP4A1, PTP4A2
KAMMINGA_EZH2_TARGETS	0.532189	1.76176	0.0027855	0.0206002	41	40	CDCA7,NAP1L1,SETDB1, PRC1, MCM2,TOPBP1,PPP1CC, POLE2, CCNB2, MKI67, H2AFZ, AURKB, TOP2A, PRIM1, CDCA5, NEK2,MAD2L1,NUSAP1, RRM1, MCM3, SMC4, DBF4, TACC3, RBL1, PCNA, XPO1, HAT1, AURKA, MCM4, IPO5, EED, ECT2, SMC2, RFC1, TFDP1, CUL2, GMNN, KPNA2, RPA3, AHCY
HOUSTIS_ROS	-0.464137	-1.79676	0	0.0208981	36	35	CP, PRDX4, XDH, GPX1,CYP1B1, HP, PRDX6, MT1A, SOD3, SCAF4, FTH1, HMOX1, HPX, SDC4, MT2A, TXNIP, FTL, TXN, PRDX2, TXN2, GPX3, HMOX2, GPX4, GPX2, GLRX2, SOD1, GCLM, SOD2,TXNRD2, GLRX, PRDX1,TXNRD1, GSR, CAT, PRDX3
HORTON_SREBF_TARGETS	-0.517629	-1.79388	0.0060976	0.0209278	25	23	ALDOC, ACLY, FDPS, SQLE, FASN, LDLR, PMVK, ELOVL6, STARD4, AACS, ME1, INSIG1, ACACA,HSD17B7, ACSS2, DHCR7, LSS, HMGCS1, FDFT1, IDI1,CYP51A1, TM7SF2, RDH11
LEE_LIVER_CANCER	-0.455721	-1.79272	0	0.0209498	49	40	ETS2, CD4, CYP2C18, LCAT, CYP2C8, FAM20C, SLC28A1, FCN1, CETN2, RXRB, HPX, PEMT, ITIH4, ADRA1A, CYP2E1, RSPO3, PLG, RCAN1, CYP4A11, C8A, GBA3, C6, CIDEB, C8B, SLC22A3, TTC36, COLEC10, SLC22A1, ACADS, IGFALS, ADH1B, NDRG2, ACAA1, LDHD, ADH4, TMEM27,DNASE1L3, TMED8, TTR, DMGDH
ZHANG_TLX_TARGETS_DN	0.461684	1.75919	0	0.0210115	89	86	LIG1, DTL, ANLN, CDC45, CENPK, TYMS, BRCA1, FANCI, MCM10, BLM, NCAPG, LYAR, CHAF1B, PLK4, SKA1, MKI67, EXO1, TTK, CENPF, TCF19, DEK, CEP55, NUP85, CCNA2, TOP2A, TRIP13, NASP, PRIM1, USP1, NCAPG2, EZH2, BUB1, WDHD1, POLA1, HAUS6, RAD54L, HMGXB4, MMS22L, FIGNL1, POLE, SLC12A2,RAD51AP1, ERCC6L, INCENP, SMC4, FANCA, ZNF280D, RBL1, CA3, CHEK1, KIF11, DIS3, DNAJC2, HAT1, HMMR, MCM4, GINS1, TIPIN, MASTL…
BOWIE_RESPONSE_TO_TAMOXIFEN	0.632381	1.7595	0.0031056	0.0210525	18	18	IFITM1, IFI16, IFI6, ISG15, IRF9, CCL5, IRF7, OAS2, MX1, IFI27,IFNGR1, IFIT3, OAS1, IFI35, IFIT2, IFIT1, IRF1, STAT1
LIN_APC_TARGETS	0.471673	1.75923	0	0.0210671	77	76	SCN5A, CCND1, PKP3, RPL39L, GLTSCR2, SORBS3, ETS1,HNRNPUL1, MPZL2, DOK1, CYB5R3, PRKCSH, AGRN, MTA1, LMNA, MMP14, KRT7, HNRNPA0, IFITM1, BCL2L15, GNA12, CD99, FBRS, ARHGDIA, LY6E, PFN1, S100A4, MAP3K11, ACTN4, SH2B2, PDAP1, CAPN1, FLOT2, ACAP1, TGM2, BCAP31, HMG20B, RAB1B, AES, PCNA, SF3A1, KRT5, ABCC1, TELO2, SEC61A1, HDAC3, TPRA1, ZBTB7A, ADSS, ARFGAP1, PRRC2A, EIF5A, SNRNP70, SLC35B2, POLR2A, …
WANG_CLASSIC_ADIPOGENIC_TARGETS_OF_PPARG	-0.502177	-1.79428	0.0064725	0.0210915	26	25	FABP5, CD36, CFD,PPARGC1B, LGALS12, CIDEC, PNPLA2, PEX11A, ORM1, CEBPA, NR1H3, FABP4, MGST3, HSD11B1, GLUL, PLIN4,SLC25A10, DGAT1, MGST1, ADHFE1, CRAT, S100A1, AQP7, EPHX2, ACSL1
SANA_TNF_SIGNALING_DN	0.463289	1.75821	0.0012438	0.0211757	90	88	PDLIM4, AHNAK2, CDCA7L, SMYD2, JAG2, ARHGDIB, CALCRL, PECAM1, ANXA2, FAM198B, LDB2, EFEMP1, ANXA1, PRKCH, CD34, EPAS1, APLN, GIMAP6, GIMAP7, BGN, TM4SF1, MYOF, ZBTB47, KRT7, VWF, PEA15, CRIP2, CCNA1, PHLDA1, KDR, ANTXR1, DDR1, CLU, NFIB, CAPNS1, RHOJ, RPS3A, ACE, PALMD, CDK2AP1, POSTN, TXNDC5, RGS4, BMX, NOS3, FHL2, TPT1, NT5E, TGM2, MTUS1, KRT18, ITGA6, HDAC2, SNRK, MMRN1, ZNF521, SDPR, LYVE1, S…
NABA_SECRETED_FACTORS	0.412306	1.75757	0	0.0212342	344	231	INHA, LEFTY1, TGFA, CCL18, FGF11, PGF, BMP8A, GDF6, PDGFD, ARTN, NGF, VEGFA, TGFB1, INHBB, SFRP2, ANGPTL4, GDF11, ANGPT2, CXCL5, MDK, TNFSF12, TGFB2, FGF13, TNFSF11, S100A3, FRZB, TGFB3, MEGF11, WNT9A, IGF2, FSTL1, VEGFC, BDNF, PDGFA, EPO, S100A16, BMP2, INHBA, CX3CL1, NRG3, MEGF6, EDA, CCL20, FGFBP2, PDGFC, CBLN4, WNT6, PF4V1, BMP8B, CCL5, PDGFB, CBLN3, TNFSF4, CCL17, VEGFB, S100A6, CRLF1, CCL28…
BREUHAHN_GROWTH_FACTOR_SIGNALING_IN_LIVER_CANCER	0.599378	1.75693	0.007716	0.0213304	22	22	TGFA, IRS2, TGFB1,CTNNB1, IGF2, IRS1, MET, EGFR, AXIN1, SMAD2, FZD7, SMAD4, DACT1, PIN1,TGFBR2, SMAD7,TGFBR1, HGF, ERBB2, AXIN2, ERBB4, ERBB3
REACTOME_FATTY_ACID_TRIACYLGLYCEROL_AND_KETONE_BODY_METABOLISM	-0.347553	-1.7886	0	0.0214152	168	163	LPCAT1, CDK19, ELOVL2, MED6, ANGPTL4, SLC27A1, ACLY, MED10, MED13L, MED26, TRIB3, NRF1, LPCAT4, NCOR2, MED15, TEAD4, GPAT2, WWTR1, TEAD3, NFYA, MED17, ACSL5, ELOVL1, MED4, GLIPR1, FHL2, SMARCD3, SIN3A, MED31, ELOVL5, TBL1XR1, NPAS2, CREBBP, FADS1, MED24, AGPAT2, MED11, NCOA3, MED16, CD36, LPIN3, MED12, RXRA, YAP1, MED22, RORA, MED29, ELOVL4, MED30, HDAC3, MED1, MED27, TEAD2, EP300,PPARGC1B, MED9,…
VERRECCHIA_DELAYED_RESPONSE_TO_TGFB1	0.53412	1.75568	0.0027816	0.0215363	39	38	MMP11, ITGA4, EFNA5, ARHGAP1, COL8A1, ITGA5, SEMA3F, MTA1, CTNNB1, DDR1, THBS2, RAC1, ILK, MMP2,TNFRSF1A, NOTCH2, ITGB8, EPHB4, RAC2, EPHA2, FGD1, CTNNA1, DSP, COL16A1, TNC, MMP17, IGFBP4, DVL3, NME4, ITGB3, MMP1, PAK2, THBS1, NEO1, RHOD, EPHB2, SMO, LAMB1
MIYAGAWA_TARGETS_OF_EWSR1_ETS_FUSIONS_UP	0.411124	1.75476	0	0.0217095	259	240	COL21A1, PGF, SAP30, DGKD, MALL, SLC1A4, KCNE4, ECSCR, IL1RAP, TMEM44, KSR1, HAPLN1, ARHGDIB, BHLHE41, NFATC4, NEURL1B, RAMP2, SIX1, GRK5, SSPN, PGM2L1, PLCD3, KRT19, CMTM3, WWC3, TOX2, ETV6, ARRDC2, ASAP1, NGFR, LBH, SEMA3F, RGS10, FLI1, TNNT1, JAG1, PTTG1IP, HMCN1, FKBP1A, CSPG5, TM4SF1, SH2B3, TSPAN13, CLEC11A, AKAP13, PREX1, CDC42EP5, RCN3, OPN3, ARHGEF6, ICAM2, IFITM1, DPYSL2, TSC22D3, KIAA1…
VERNELL_RETINOBLASTOMA_PATHWAY_UP	0.47891	1.75367	0	0.0217372	70	68	CDCA7L, MCM7, CHAF1A, CDCA4, CENPK, CLSPN, KANK2, ASF1B, BLM, MELK, RFC4, E2F2, ATAD2, SPIN4, TCF19, DEK, FANCL, RRM2, HMGB2, CDCA5, UBR7, MCMBP, VRK1, FEN1, EZH2, CDKN1A, HAUS1, BARD1, ESCO2, TMEM97, PBX3, RRM1,RAD51AP1, RECQL4, FANCA, PCNA, RFC3, PTX3, CNOT6L, SKP2, HUNK, FST, RAB27A, MCM4, EGR1, NPAT, ZNF367, DCK, KCNK1, DONSON, CCNE1, POLD3, TMPO, EED, BTG3, MANEAL, TFDP1, EPS8, FBXO5, FAM161…
MULLIGHAN_NPM1_MUTATED_SIGNATURE_2_DN	0.473412	1.75378	0.0025974	0.0217779	77	71	DGKD,C15orf39, GUCY1B3, EIF3D, FXYD5, PPM1F, SORBS3, ACLY, MMP15, RPL28, EIF4B, CD34, LDHA, STK10, LPAR6, ARL4C, CHST7, RAB4A, TCF7, EIF3F, ALDOA, LRP4, PHB2, EEF1D, GAS6, PES1, RARA, OAZ3, MEF2A, GPI, LAX1, QARS, CD7, SYNJ2, MRC1, GDI2, MAP4K1,SERPINF1, FHL1, UBE2L3, BTN2A2, XRCC6, LTBP4, RRP9, WDR1, UXT, FAM162A,PPP1R16B, LDLR, ELAVL1, FAM134B, ABCG1, LRRN2, PSG9, ARID3B, CARM1, TCEB1, RERE, NB…
REACTOME_G_ALPHA_I_SIGNALLING_EVENTS	0.440881	1.75384	0	0.0218125	195	126	MCHR1, NMU, S1PR5, CCR10, ADCY3, NMUR1, GNAI2, CXCL5, ADCY8, CXCR4,CXCL16, GNB1, S1PR1, ANXA1,BDKRB1,ADORA3,P2RY14,BDKRB2, GNG10, OPN3, HTR1F, ADCY7, GNG11, GNB4, GNAI3, CCL20, APLNR, S1PR4, LPAR2, GNG2, RGS19, GNGT1, SAA1, CCL5, ADCY4, FPR3, ADCY5, GNB2, CCL28, CCR7, CXCL3,ADRA2B, C3, RGS4, CNR1,GABBR2, RGS1, CXCL6, FPR1, C5AR1, C3AR1, CXCL9, SST, GNAS, S1PR3,P2RY12, APP, CCR5, CXCL1, CXCR3, S1P…
NABA_ECM_REGULATORS	0.424255	1.75391	0	0.0218661	238	176	TGM5, TGM1, EGLN3, ADAMTS7, LOXL2, P4HA1, ADAM18, P3H3, HTRA4, P3H1, MMP9, MMP11, BMP1, MMP15, SERPINH1, PLOD1, SERPINA3, MMP16, P4HA3, PLOD3, PCSK6, ADAMDEC1, ADAMTS5, MMP14, TIMP1, PAMR1, ADAM17, CTSZ, CTSD, ADAM19, TIMP2, SERPINI1, LOX, LOXL3, CTSK, CST6, PLOD2, PI3, ADAMTSL4, SULF1, SERPINB8, ADAMTS4, SERPINB9, SERPINB6, ADAMTS10, ADAM9, MMP19, ADAMTS2, ADAM12, MMP13, CTSW, ADAM11, A2M, ADAMT…
AMIT_EGF_RESPONSE_240_MCF10A	0.610451	1.75231	0.0062992	0.0219068	20	20	PTHLH, TGFA, PTAFR, MICAL2, DUSP4, BMP2, GABPB1, EHD4, SLC7A11,TNFRSF12A, ITSN1, STK17A, PCDH7, B3GNT2, GPN2, AKAP12, SOCS2, INSIG1, HERPUD1, PLAU
FONTAINE_THYROID_TUMOR_UNCERTAIN_MALIGNANCY_UP	0.550773	1.75255	0.0014184	0.0219291	36	31	OAZ2, TESC, FLT1, TSHR, MESDC2, FBXL16, PBXIP1, VEGFC, CD63, GRB10, CLDN7, CD4, PTK2, PDCD4, SNCB, CTNNA1, CA11, NIPAL3, NR2F2,TMEM125, AQP4,BCL2L11,IGF2BP2, ARIH2, CAPN3, UGGT1, KPNA2, KCNK5, SNRPG, ZMYM5, PSAT1
MCBRYAN_PUBERTAL_TGFB1_TARGETS_UP	0.42093	1.75054	0	0.022282	169	167	ANO1, IER5, SLC2A1, VEGFA, CP, GJA1, TPSB2, CDKN2B, RUNX1, MEF2C, PTPRK, ETS1, BMP1, RPL27A, COL8A1, CYTH1, GSN, NOTCH4, CYB5R3, JAG1, EPAS1, LASP1, HSPG2, TMEM2, MFGE8, SOX9, MMP14, PIAS3, COPS2, ARL4A, DKK3,CDC42EP5, FN1, ETS2, PCOLCE,MARCKSL1, TIMP2, OGFR, KDR, CLIC1, TNFAIP6, GUSB, PLOD2, TPM2, PDGFC, ACTG2, ACTA2, CNN3, CLU, AKT1, GRB10, VCAN, RAD23A, F2R, GALNT2, NFIB, WEE1, S100A6, CAP1, C…
KEGG_STEROID_HORMONE_BIOSYNTHESIS	-0.448819	-1.78276	0.0034602	0.0222888	55	43	STS, SRD5A3, CYP1B1, AKR1D1, CYP21A2, COMT, HSD17B3, UGT2B15, HSD17B6, HSD17B2, UGT1A10, HSD17B8, HSD3B2, HSD11B1, UGT1A4, UGT1A7, CYP3A5, UGT1A9, UGT2B10, UGT1A3, SULT2B1, UGT1A8, UGT1A1, UGT2A1, AKR1C2, CYP17A1, UGT2B4, UGT2B7, CYP3A4, CYP1A1, SRD5A1,HSD17B12, CYP3A7, AKR1C4, AKR1C3, HSD17B1, HSD17B7, CYP7B1, AKR1C1, UGT2A3, UGT1A6, CYP11A1, HSD11B2
KEGG_ARGININE_AND_PROLINE_METABOLISM	-0.42398	-1.78329	0	0.0223925	54	50	AMD1, P4HA1, NOS2, P4HA3, PYCR2, SRM, P4HA2, NOS3,ALDH18A1, SAT1, GLS2, CKMT1A, PYCR1, ARG1, CPS1, CKMT1B, PRODH, PRODH2, DAO, SMS, GLUL, MAOB, AGMAT, CKB, NOS1, GAMT, NAGS, ALDH1B1, ASL, LAP3, CKMT2, ALDH2, ASS1, ALDH7A1, PYCRL, SAT2, GATM, ODC1, GLUD2, ACY1, GLUD1, OAT, ALDH3A2, ALDH4A1, ALDH9A1, ARG2, GOT1, GOT2, GLS, MAOA
BANDRES_RESPONSE_TO_CARMUSTIN_WITHOUT_MGMT_48HR_DN	0.554883	1.74726	0.0058565	0.0231065	32	29	KRT17, ADRA1B, SEPT5, MDK, ITGA3, HMGN2, ACTN1, FYN, IRS1, GTF2F1, YWHAH, PFN1, FBN1, ACTC1, LOXL1, WIPF1, PPM1G,DTX2P1-UPK3BP1-PMS2P11, ADCYAP1, AMH, ATP5D, INPPL1, MAP4K2, ATP1A3, TUBG1, INSIG1, EPHX1, LRCH4, NRTN
MATTHEWS_AP1_TARGETS	0.64066	1.74665	0.0032787	0.0231882	17	16	VIM, CAV1, LBH, PLAUR, SPRY1, CD44, CA3, BCL3, HBEGF, MVD, PTGS2, FLNC, STMN1,IL1RL1, SPP1, MGST1
BROWNE_HCMV_INFECTION_18HR_DN	0.421192	1.74506	0	0.0234558	178	161	LRRC17, GPR176, VASH1, TGFB1I1, MT3, PLXND1, DENND3, SSPN, PLCD1, RPS6KA2, THBS3, OBSL1, TRIOBP, FGF13, ETV6, ARHGAP1, WWP2, PTRF, MAZ, CCDC85B, COL6A2, PTEN, CD44, AXL, PDGFRB, PAMR1, ATP2B4, OCA2, RIN2, FYN, GNG11, IRS1, TNIP1, LPCAT4, COL6A1, GUCY1A2, WNT6, RRAS, VCAN, RAD23A, CEP250, GAS6, COL3A1, MAP1A, EXT1, C1orf123, BTBD2, ADAM12, CBFA2T3, VAMP5, MAP2K5, RBPMS, LRRC32, CACNA1A, RBMS3, EPH…
PID_S1P_S1P3_PATHWAY	0.559469	1.74109	0.0043103	0.0243404	29	29	VEGFA, GNAI2, CXCR4, FLT1, S1PR1, MAPK3,PDGFRB, GNAI3, GNA12, RAC1, AKT1, GNA13, PDGFB, RHOA, GNA15, AKT3, S1PR3, GNAQ, S1PR2, ITGB3, GNAI1, SRC, GNAO1, MAPK1, GNA14, ITGAV, GNA11, GNAZ, JAK2
GHO_ATF5_TARGETS_DN	0.640373	1.74144	0.0185759	0.0243767	16	16	CCND3,SLC2A1, ITGA5,KIF20A, RRAS, TMED9, YWHAH,TRIP13, RND3, ACTN4, ITGA2, DUSP1,BTN3A2, RPN1, ID1, TECR
DAVICIONI_TARGETS_OF_PAX_FOXO1_FUSIONS_DN	0.484568	1.74111	0	0.0244025	68	61	SOX11, IGFBP3, COL11A1, EDNRA, FKBP10, TRIB2, PLK2, TCF4, SPRY4, DDIT4, MICAL2,ARHGAP15, ATP2B4, ARHGEF6, PHLDA1, DUSP4, PPFIA4, MARCKS, SPARCL1, LRP5, TBC1D8, REEP1, ACTC1, YY1, ITPR1, TRIL, CCL4, TTN, MSTN, ZFP36L2, LRRN3, PLCB4, TNIK, KCNH2, EXPH5, MOXD1, PDE4D, ATP2A1, PPP1R3D, CCL2, C3orf52, CXorf57, SRSF6, ADORA1, KCTD12, SPOCK2, GREM2, PKIA, WDR7, BBX, FGF9, LARP1, NEB, OLFML3, RGS2, PDP1,…
KIM_RESPONSE_TO_TSA_AND_DECITABINE_UP	0.437099	1.73987	0	0.0244973	129	118	NMB, KRT17, KRT86, IL1RAP, SFN, LAMB3, KRT23, PECAM1, FKBP1B, KRT19, CLIC3, ISG20, S100A3, CDCP1, CABYR, WISP2, CSPG5, NINJ2, RNASET2, KRT7, ICAM2, LXN, SERPINI1, CST6, HCLS1, MUC1, NEFL, IL1R2, CPA4, CXADR, CLU, LAMC2, TES, CLDN7, COL3A1, PLA2G16, IRF7, TTC39A, CNN1, IFI27, CDKN1A, SLC6A8, TACSTD2, PPL, TGM2, HTATIP2, SST, FADS3, SAT1, SERPINF1, TOB1, CD70, ARL14,HIST1H2BJ, BIK, ISYNA1, C9orf3, …
JAEGER_METASTASIS_DN	0.408205	1.74011	0	0.0245112	258	228	GPR87, KRT17, DUOX1, NMU, FXYD3, COL17A1, KRT15, LAMA3, DGKA, SLC1A4, SLC2A1, PKP1, SFN, PKP3, LAMB3, TMEM45A, GJA1, TPSB2, PLP2, DUSP7, TPSAB1, KRT23, PER2, LSR, EFS, ITGB4, CPA3, KRT19, MST1R, CLIC3, MPZL2, EPHX3, SDC1, JAG1,TP53AIP1, ITPR3, DSC2, TM4SF1, PYCARD, CDH3, CD24, ETS2, TRIM29, BCL11A, GJB3, BICD2, CST6, SCEL, PERP, PI3, KLF5, IL1R2, FZD10, ABCC3, HLF, CXADR,RAPGEFL1, LAMC2, EPPK1, E…
SATO_SILENCED_BY_METHYLATION_IN_PANCREATIC_CANCER_1	0.394699	1.7393	0	0.0245616	419	353	HLA-G, COL21A1, NPTX2, PGF, PFKFB4, CDH8, TRPV2, CD200, IGFBP3, SFN, LAMB3, KSR1, FSCN1, RAB38, COPZ2, NETO2, APBB2, EFEMP2, PML, LHX2, RPL39L, BST2, ANGPT2, PDK1, MCAM, GMFG, CPA3, NRGN, PRAF2, MAPK8IP3, PXDN, HEY1, MSX1, NGFR, C10orf10, ISG20, S100A3, EFEMP1, TNNT1, CRABP2, LHFP, LGALSL, ITGA7, GP6, TNFRSF10D, SPARC, PLAUR, RAB31, PTGIR, PRR15L, ZHX2, CD180, SLC12A4, KRT7, CLEC11A, RCN3, TP53I1…
AMUNDSON_GAMMA_RADIATION_RESPONSE	0.52884	1.73896	0.0014144	0.0245627	40	39	MSX1, PRC1, CDKN2C, KIFC1, UBE2C, RRP1, CCNB2, PTTG1, AURKB, TTK, CCNB1, CENPF, CCNA2, WEE1, CDC25C, PLK1, BUB1, NEK2, MAD2L1, KIF2C, CENPA, H2AFX, CCNF, BUB1B, TACC3, CENPE, AURKA, TSN, CDK1, LBR, DNMT3B,PPP2R5A, KIF23, CKS2, PRRG2, CDC25B, ESPL1, GTPBP1, AIMP2
BARIS_THYROID_CANCER_DN	0.484415	1.73843	0.0039062	0.0246234	59	58	CCND1, INPP5D, TGFB1, ANXA4, COL8A1, CYTH1, CD44, BGN, TIMP1, LLGL1, UBE2C, CDH3, PKN3, CCND2, RECQL, RB1, KLF5, ABCC3, RPL13A, GLG1, USP1, MMP2, SP110, IGF1R, CSNK2B, SNRPF, CD2, CALM2, RAB8A,SMARCA5, CTNNA1,IL13RA1,OSBPL1A, KLHL9, CD40LG, VCL, FNTA, LMO7, EVPL, IRF1, ERBB2, FGFR4, NEDD8, ATF1, HDGF, FGB, SEPT2, DUSP6,TNFSF13,TNFSF10, GRB7, RAD50, GATA3, TOP2B, UBA1, TJP2, RAF1, ACY1
BIOCARTA_NKT_PATHWAY	0.591953	1.73745	0.0030722	0.0247856	29	22	TGFB1, IL4R, TGFB2, CXCR4, TGFB3, IFNGR2,IL12RB1, CCR7, CD4, IFNGR1, CCR5, CXCR3, CCL4, CD28, IFNG, CCL3, CD40LG, CCR2, CCR1, CCR4,IL12RB2, IL18R1
UROSEVIC_RESPONSE_TO_IMIQUIMOD	0.585986	1.73755	0.0088496	0.0248298	23	23	IDO1, ISG20, BRCA1, IFITM1, IFI6, ISG15, IRF7, OAS2, CCR7, MX1, RSAD2, OASL, MICB, CXCL11, OAS1, IFI35, TRAFD1, IL6, SECTM1, CCL8,RARRES3, STAT1, IFI30
BRUECKNER_TARGETS_OF_MIRLET7A3_DN	0.468012	1.73618	0.0037879	0.0249696	78	70	LOXL2, FLNB, COL11A1, RNF149, VIM, RPL7A, CXCL5, PLK2, COL4A2, TGFB2, PMEPA1, NNMT, LBH, PTPRF, EFEMP1,LGALS3BP, LASP1, SPARC, COL5A1, GALNT1, MFGE8, PRSS23, NRP2, FN1, RIN2, GPC1, PLA2G16, RAB34, CXCL3, DPYSL3, SULF2, CALD1, EPB41L2, BCL2A1, DCBLD1, CORO1C, ACTR3, ANXA3, FAM83D, CXCL1, AKR1B1, DIO2, CD70, TRAM1, BZW1, EIF5, MT2A, TRNP1, EIF4G2, PTGES, COTL1, MATN2, GALNT10, MORC4, TM2D2, AKR1B10…
GRAESSMANN_RESPONSE_TO_MC_AND_SERUM_DEPRIVATION_UP	0.412647	1.73632	0	0.0250052	211	191	DAPK2, CRHR1, PTHLH, COL5A3, RTP4, FJX1, TUBB4B, CP, INHBB, ADCY3, TRIM21, BST2, TRIB2, COL5A2, PMEPA1, ENC1, NNMT, RBMX, FES,LGALS3BP, PLEC, WISP2, PCDHB16, RBM43, IFI44, PRSS23, PDGFRB, BGN, ELK1, DKK3, LIPA, IGFBP7, FSTL1, NCK1, NEDD9, SLC24A3, RIN2, ADCY7, HLA-E, IRS1, PCDHB15, N4BP2L1, STEAP4, TACR2, FCGR3A, LY75, PFDN5, SP100, ISG15, IRF9, TRIM25, FAS, COL3A1, IRF7, OAS2, CEP112, DLC1, ABI3…
ZHANG_PROLIFERATING_VS_QUIESCENT	0.501009	1.73521	0	0.0251551	51	50	CCND1, SKI, RPL6, MCAM, CASP4, RPS19, ITGB1, ITGA5, RELA, BAX, PLAUR, TMSB10, AXL, CCND2,MARCKSL1, CCNG2, TIE1, PTMA, CCNB1, MDM2, RHOA, MAP3K11, CASP3, GPI, NME2, GPX1, JUN, GNAS, ITGA6, IGFBP2, DYNLL1, CXCL2, DAD1, GSTP1, GSTM1, CTGF, ITGB3, RAD23B, NDUFB7, TCEB1, HSPB1, ITGAV, PRDX2, DDIT3,HSP90AA1, GADD45A, TEK, GRB2, SOD1, CDH2
GROSS_HYPOXIA_VIA_HIF1A_DN	0.444431	1.73379	0	0.0253414	110	102	MTCP1, PDLIM4, PGF, LHX9, SLC2A1, VEGFA, PRKCDBP, EDN1, VWA1, ENO2,TRAF3IP2, INSIG2, ADM, GAPDH, CAV1, DUSP14,C10orf10, NPEPPS, LLGL1, LXN, PPP1R9B, GYS1, PNRC1, CACNA1H, LRP5, HIGD1A, TRAF6, POLR2D, ZNF143, MYH9, ENO1, FOXO3, BHLHE40, KLF4, LNPEP, BNIP3, ARL6IP5, CAPN1, PPL, ERRFI1, NFKBIA, CSRNP1, SKIL, SPRY2, ACAP2, PRPF19, KLF10, MT1A, CPD, ATF3, FST, C8orf4, SGK1, FOS, NPTX1, TGIF1, S100A13,…
WORSCHECH_TUMOR_REJECTION_UP	0.508508	1.73407	0.0027586	0.0253514	56	45	TNFRSF4, IL1RAP, CCR10, NKIRAS2, EBF4, TNFSF11, IFITM1, CKLF, IFI16, IL4I1, STAT6, CCRL2, CCL5, GZMB, ALCAM, KLRD1,TNFRSF1B, CCL22, STAT2, MSR1, IL7R, TAGAP, CXCL1, CCL4, ITK, MX2, CXCL2, FASLG, CLEC10A, CXCL11, IRF4, IFNG, TLR4, NFKBIZ, IL2RG, TLR6, LCK, IFIT1, IL7, IL1B, IRF6, NKRF, IL17RB, CCL11, NFAT5
REACTOME_EXTENSION_OF_TELOMERES	0.574061	1.73321	0.002994	0.0254046	27	27	RFC2, LIG1, RPA1, RFC5, POLE2,WRAP53, RFC4,RUVBL2, PRIM1, DKC1, FEN1, NHP2, POLA1, PRIM2, POLD1, POLE, RPA2, PCNA, RFC3, POLA2, POLD4, POLD3, POLD2, TERT, DNA2, RPA3,RUVBL1
PID_LYMPH_ANGIOGENESIS_PATHWAY	0.571417	1.7317	0.0089021	0.0254173	25	24	ITGA4, ITGB1, ITGA5, FLT4, SHC1, MAPK3, VEGFC, FN1, COL1A2, COL1A1, AKT1, ITGA1, MAPK11, CRK, CREB1, ITGA2, SOS1, PIK3CA, MAP2K4, MAPK1,RPS6KA1, PIK3R1, MAPK14, GRB2
DOANE_BREAST_CANCER_CLASSES_DN	0.542055	1.73197	0.0044248	0.0254186	34	31	ARTN, ATP11A, PYGL, FSCN1, MARCH3,SLC16A1, PLAUR, CHST3, DSC2, LMO4, TIMP2, PLOD2, CALU, WWTR1, DEK, SGCB, WDR33, ANP32E, PAPSS1, PARVB, CEBPD, FBXO31, PMAIP1, POPDC3, FERMT1, EHBP1, CLIP4, SPP1, SMO, FOXC1, NNT
PID_ILK_PATHWAY	0.512587	1.73227	0.0026212	0.025456	45	45	CCND1, NACA, ARHGEF7, NCK2, CTNNB1, ARHGEF6, RHOG, CDC37, ACTN1,PPP1R14B, ZEB1, DIAPH1, RAC1, AKT1, ILK, PARVA, SNAI1, RUVBL2, ZYX, IQGAP1,PPP1R14A, PARVG, MYL9, GIT2, LIMS1, CREB1,PPP1R12A, LIMS2, TNS1, JUN, TACC3, PARVB, CDC42, PXN, GSK3B, XPO1, AURKA, PARP1, CKAP5, RUVBL1, RICTOR,HSP90AA1, ILKAP,PPP1R14C, ELMO2
LIANG_SILENCED_BY_METHYLATION_2	0.496622	1.73198	0.0027285	0.0254835	53	48	KRT17, H19, MCAM, CXCL5, IFI44, IFI44L, INHBA, PI3, CCL20, SP100, IFI6, CCL5, IRF7, OAS2, AREG, MX1, XAF1, S100A4, C3, IL13RA2, SLPI, THBD, CXCL6, NT5E, TNFAIP3,HIST1H2BE, MX2, STC1, CXCL2, BIK, IFIT3, OAS1, ICAM1, LCN2, C1S, IFIT2, IL6, IFIT1, MMP1, HBEGF, PTGS2,HIST1H2AC, DHRS2, TNFSF10, STAT1, UCHL1, STX3, SOD2
BLUM_RESPONSE_TO_SALIRASIB_DN	0.39404	1.73083	0	0.0255006	342	337	SOX11, OAZ2, RFC2, CCND3, LIG1, RGS5, TUBB4B, GUCY1B3, SEPT9, DGCR2, E2F1, MID1, KIF4A, ACLY, TPI1, GINS2, TCF4, RPA1, MCM5, CHN1, ENC1, RAD51, SDC1, CHAF1A, CRABP2, CDK2, SUV39H1, CDC45, MYBL2, TUBA1A,LINC00094, FNTB, TMEM2, LDHA, PSMC3IP, LMNA, RNASEH2A, PRC1, TYMS, GALNT1, SMARCE1, SOX9, PRSS23, PDGFRB, PIAS3, NPEPPS, RFC5, BRCA1, CDKN2C, CDC6, UBE2C, OPN3, RAB4A, CRIP2, MCM2, COL1A1, TUBB, TO…
BILD_HRAS_ONCOGENIC_SIGNATURE	0.402671	1.73239	0	0.025501	261	239	PTHLH, TGFA, HK2, AHNAK2, MALL, LAMA3, FLNB, VEGFA, SFN, ANGPTL4, SLC16A3, MID1, PTPRE, CXCL5, RUNX1, CSNK1E, ZNF608, TPM1, TGFB2, SPRY4, NDRG1, SEMA4B, SDC1, LINC00341, ARHGAP25, CASP2, CDCP1, ITPR3, DENND2C, GJB5, ELK3, LRRC8C, PLAUR, SMTN, ADAMTS5, MMP14, TIMP1, TNFRSF10B, CHST11, SLC2A3, FAM110C, TRIM22, INPP1, CASP1, CCNA1, FN1, PHLDA1, PDGFA, DUSP4, GJB3, KCNN4, BMP2, PLXNA2, CD55, PI3, KLF…
BILD_MYC_ONCOGENIC_SIGNATURE	0.41462	1.73261	0	0.0255025	206	191	TGM1, DUOX1, FGF11, HK2, PLEKHG2, DGKA, NLE1, COL8A2, SNHG1, HSPA6, NPM1, KHNYN, MRTO4, RUNX1, PA2G4, MST1R, TRIOBP, EXOSC5, NGFR, ZNF667, GPRC5A, FCHSD1, PLEC, DIEXF, CDK2, C20orf27, TUBA1A, MAP3K6, RHBDF1, TRMT1, COL5A1, SMTN, ATP2B4, GNL3, MYBBP1A, COL1A1, BID, CCDC86, PDLIM7, ABL2, CCNG2, TTLL12, NRP1, PTRH2, ABCC3, IRF9, C19orf48, LAMC2, UTP14A, TINF2, AHNAK, DDAH2, PCYOX1L, EMP1, SRM, EPS8L…
MARKEY_RB1_ACUTE_LOF_DN	0.411668	1.73026	0	0.025509	226	212	HLA-G, SAP30, ALDH1A2, MBD1, IGFBP3, TMEM45A, PLA2G7, ALDOC, MXI1, PDK1, GMFG, PFKP, CASP4, ANXA4, NDRG1, TAPBP, ISG20, LGALS3BP, TBC1D22A, CRABP2, TGFBI, AGRN, CPXM2, GBP2, FKBP7, XDH, DAXX, AP3S1, KRT7, RNF34, CTSZ, ITGAX, PROCR, PLEKHO1, IFI16, RAB8B, BID, ITGB2, HLA-E, HCLS1, TYROBP, IL18BP, FERMT3, SP100, ISG15, FCER1G, IRF9, SERPINB9, TAP1, GRN, LYL1, SAA1, STAB1, PSMB8, CCL5, UBE2L6, IRF7,…
KAAB_HEART_ATRIUM_VS_VENTRICLE_UP	0.404741	1.73045	0	0.0255391	249	234	DAPK2, PDLIM4, CD47, ALDH1A2, CRIP1, VASH1, TGFB1I1, QSOX1, TGFB1, OS9, SGCE, ENO2, EDNRA, EXOSC2, VIM, UNC5B, AFAP1, PAM, MDK, NAP1L1, RPL3, ADM, PRAF2, TNFSF12, NDRG1, FAM172A, ARHGAP1, FEZ1, CD81, EFEMP1, ROR2, PLOD3, RPS2, TAGLN2, CCDC85B, WISP2, HSPG2, MYL4, MICAL2, PLA2G5, PRSS23, SLIT3, SMARCD2, GRIN2C, TRPC1, ZNF365, PBXIP1, KCNA5, INPP1, TMED3, DYRK2, ACTN1, CD63, NMNAT2, AUTS2, ACTA2, S…
BAKER_HEMATOPOIESIS_STAT3_TARGETS	0.649103	1.7309	0.0061162	0.0255509	16	16	CCND1,CCND3,VEGFA, MMP9,CCND2, FAS,CCNA2,BIRC5, MMP2, MYC, BCL2, MCL1, PIM2, IL6, PIM1,HIF1A
DAZARD_UV_RESPONSE_CLUSTER_G1	0.479185	1.72757	0.0013141	0.0262256	67	59	SFN, COL11A1, RPL38, ANXA2, RPL30, CHRNB1,C2orf27A, RPL37, RPL31, RPL37A, RPS23, PLXNA3, RPL34, PGK1, STK17B,HSP90AB1, SEC61G, CST6, RPS17, STAT6, GUK1, OAS2, RPS29, RANBP1, HEXIM1, SNRPE, GPAA1, MYL6, DYNLL1, CXCR3, TK1, PDLIM5, RPL36A, TSC22D1, NOL7, MVP, RPS27, ZNF623, PPBP, IL6, SPTBN1, NR4A2, EIF2AK2, NDUFA1, NCBP2, COX17, TXN, COX7C, UQCRB, NDUFC1, NF2, SAP18, COX7A2, ATP5I, PHACTR1, ERCC2,…
PETROVA_ENDOTHELIUM_LYMPHATIC_VS_BLOOD_DN	0.420306	1.72559	0	0.0265747	162	156	PDLIM4, ECE1, PGF, AHNAK2, LOXL2, MT3, APBB2, ARHGDIB, ENO2, IL4R,ARHGAP22, TPM1, FAP, CXCR4, PLOD1, COL8A1, NNMT, FLT1, ITGA5, EFEMP1, RGS10, TGFBI, AGRN, GBP2, CD44, AXL, BGN, MMP14, ARL4C, KRT7, TRIM22, RNASE1, VEGFC, ICAM2, PROCR, COL1A2, PLOD2, STAT6, RCN1, COL6A1, TPM2, LY75, ACTA2, ISG15, CLU, LAMC2, RRAS, VCAN, LYL1, CCRL2, CLDN7, LAMA5, EXT1, RHOB, EMP3, LTBP2, ITM2A, TAGLN, IFI27, ITGB5…
NABA_BASEMENT_MEMBRANES	0.528258	1.72565	0.001385	0.0266327	40	36	LAMA3, LAMB2, LAMB3, LAMA4, COL4A1, COL4A2, HMCN1, COL6A2, HSPG2, AGRN, LAMC1, NID1, COL6A1,COL15A1, NID2,COL18A1, LAMC2, LAMA5, COL6A3, NTNG2, LAMC3, COLQ, LAMA1, PAPLN, LAMA2, NTNG1, NPNT, NTN1, USH2A, COL4A5, COL4A6, LAMB4, NTN4, LAMB1, COL4A4, COL4A3
FERRANDO_TAL1_NEIGHBORS	0.596077	1.7235	0.0153846	0.0269853	21	20	CRIP1, LGALS3, RUNX1, MYBL2, ITGB2, TCF7,TNFRSF1B, CD6, BCL2A1, CD2, CD3E, CSF1R, FOLR1, TMSB15A, CDA, CXCR1, LCK, DTYMK, IL23A, FCGR3B
WANG_RESPONSE_TO_GSK3_INHIBITOR_SB216763_DN	0.391513	1.72358	0	0.0270383	374	330	ST8SIA4, FOXJ3, LPCAT1, ECE1, SLC1A4, RFC2, SLC2A1, F2RL3, IL1RAP, DLX1, IL3RA, HN1L, DTL, MCM7, PDK1, UHRF1, GMFG, PFKP, PTPRE, ITGA4, MATK, MRTO4, CENPH, TSR1, GINS2, NDRG1, MCM5, RASGRP2, EXOSC5, GEMIN4, MOB3A, RAD51, ITGA5, CHAF1A, CDK2, SUV39H1, CDC45, MYBL2, CDCA4, CENPK, RNF122, SLC16A1, DERL3, PSMC3IP, RFTN1, TYMS, PKMYT1, SLC7A5, CD180, CLSPN, ARL4C, BRCA1, CHST11, ASF1B, CDC6, SLC2A3, M…
MEISSNER_NPC_HCP_WITH_H3K4ME2_AND_H3K27ME3	0.399775	1.72361	0	0.0270943	349	232	SLC30A10, DNAH11, CRHR1, GRIK3, ATP2B2, SCN5A, DLX5, CDH8, ALDH1A2, BMP8A, PGBD5, STAC2, HR, TGFB1, ACAN, SCN4B, SYT12, JAG2, PRR16, ECEL1, RASGRF1, KCNH8, PTGFRN, HOXD13, TESC, FIBCD1, FOXC2, CITED4, ZNF296, FOXF2, SLC12A5, VWA2, B3GNT7, FLI1, KCNS3, HOXD11, WNT9A, CPNE5, STBD1, FOXF1, GALNT14, IGF2, SOX18, AHR, ITGA3, PRPH, FAM78A, CALCR, COL13A1, SPINT1, CBLN4, WNT6, ELAVL3, HOXD1, IGSF21, SOR…
HAHTOLA_MYCOSIS_FUNGOIDES_SKIN_UP	0.413775	1.72373	0	0.0271337	177	174	PDGFD, RGS5, P4HA1, IGFBP3, NUDT1, GMFG, CPA3, RCBTB2, APEX1, HNRNPA1, TCF4, LDB2, FEZ1, SSR2, LBH, GNB1, MAP4K4, GSN, ERG, DENND5A, CCDC85B, CASK, RPL23, LRRC15, ARPC1A, TM4SF1, KANK2, ZNF22, CASP1, CCND2, CKLF, PWP1, TSC22D3, RECQL, FLNA, MARCKS, ATG12, CNN3, MPRIP, UBE2Z, PPIB, LY86, RPS21, NFIB, SP3, CD52, ITM2A, SRSF9, MFAP3, ITGB3BP, CUTC, CAPZB, HPGDS, PFN1, FOXO3, ZNF292, ZNHIT3, SART3, P…
WILCOX_RESPONSE_TO_PROGESTERONE_DN	0.477361	1.72264	0.003963	0.0271445	66	58	CCND1, LOXL2, IGFBP3, COL8A2, COL11A1, PECAM1, COL5A2, PLEC, MICAL2, ATP2B4, FN1, BDNF, COL1A2, COL1A1, PDLIM7, INHBA, COL6A1, XIST, MGP, FRMD4A, NTM, ARHGDIA, PCDHGA1, IGFBP5, MYL9, MMP2, OXTR, IGF1R, CYP2C18, IGFBP2, CSTA, COX7A1, COL16A1, KCNK3,NOTCH2NL, CHRNE, PIEZO1, PRRC2A, SPON2, DES, METAP2, TRA2A, L1CAM, THBS1, PCDHGA3, DST, CLIC4, TNFSF10, CPM, MME, HIPK2, OGT, ABCC6, NEFH, PLAU, AKAP9,…
HUANG_GATA2_TARGETS_DN	0.472775	1.72167	0.0012937	0.0273084	72	64	HK2, SLC1A4, SLC2A1, EIF3D, SEMA4B, GUCY1A3, PIGT, MTHFD1L,ARHGAP29, SLC2A3, PHLDA1, RRP1B, MRVI1, SLC6A9, IPO11, E2F2, CLU,TMEM132A, PDGFB, TMEM109, RCOR1, SHMT2, PDCD4, MTHFD2, TXNDC5, ESAM, DIAPH3, FAM3C, LAT, ZFPM1, ACTB, JMJD6, FDPS, PFAS, FHL1, SSSCA1, TCOF1, NUP107, LMO2, SKP2, GOLT1B, ASNS, SLAMF1, AURKA, PLAGL2, EGR1, TRMT61A, PARM1, TFRC, DAAM1, PODXL, NOMO1, RABGEF1, TACC1, EXOC3L4, DC…
RASHI_RESPONSE_TO_IONIZING_RADIATION_6	0.455564	1.72103	0.0012887	0.0273876	84	78	PTP4A3, UNC93B1, ALDOC, CXCR4, NONO, MAZ, GBP2, RNASE1, PLEKHO1, CD79B, PURB, BRIX1, ZNF653, ALDOA, IL1R2, TYROBP, FERMT3, ZCCHC3, LAPTM5, FAS, CCL5, EMP3, FMNL1, MBTD1, ZNF688, HHEX, FCGR2B, DDX18, SELPLG, SLPI, PSMB9, TCF25, RHOH, CFP,RAD51AP1, EVI2A, INCENP, CD48, BAG6, CXCL9, MSC, IKZF1, CSF2RA, SAAL1, CSF1R, SORBS1, SGIP1, CXCL13, PTPRC, SNRPB2, PIP4K2A, PQLC3, RNF38, S100A9, ARNTL, PDE7A, A…
ZHAN_MULTIPLE_MYELOMA_HP_UP	0.510876	1.72109	0.0013908	0.0274383	49	43	THG1L,EPB41L4A-AS1, SNHG1, SNHG7, GLTSCR2, RPL7A, CCDC85A, RPL37, FRZB, FLI1, POLR1D, GNG11, RPS17, RPL13A, CCRL2, F2R, OAS2, AMIGO2, RSAD2, LAMP3, GTF2F2, FCHSD2, XRCC4, CCR5, CSNK1G3, IPO7, SCAPER, KIAA0141, DDX58, CDV3, EPHB1, LAG3, RBM4, ELOVL7, SEMA4D, GBA3, RC3H2, PIP5K1B, SIDT1, TNFSF10, ATP5L, SCYL2, PAK1
REACTOME_ENERGY_DEPENDENT_REGULATION_OF_MTOR_BY_LKB1_AMPK	-0.566109	-1.75667	0.0243243	0.0275824	18	16	RPTOR, TSC2, STK11,PRKAA1, TSC1,PRKAB2, RHEB,CAB39L,PRKAG1,STRADA,STRADB, PPM1A,PRKAB1,PRKAG2,PRKAA2, CAB39
DAVICIONI_TARGETS_OF_PAX_FOXO1_FUSIONS_UP	0.396011	1.71909	0	0.027638	255	242	PGF, LRRC17, EPHA3, PDGFD, HPCAL1, ZNF395, IRS2, PTPRU, LOXL2, TGFB1I1, PCDH17, FXYD5, MARCH3, IL4R, MCAM, TMEM47, PTPRE, CAV2, CSNK1E, NDRG1, PXDN, CXCR4, CAV1, NNMT, MAP4K4, MMP16, FAM49A, KCNS3, COL6A2, COL5A1, ELK3, DPY19L1, TCF7L1, TPBG, CD44, RASL10A, ADAMTS5, NRP2, ARL4C, TIMP1, ARHGAP29, MYOF, CHST11, PEA15, INPP1, VEGFC, MAGEL2, CCND2, ADAM19, NR3C1, NID1, INHBA, CD58, LDOC1, PPP1R14B, G…
VERRECCHIA_RESPONSE_TO_TGFB1_C1	0.601188	1.71933	0.0121581	0.0276449	19	19	LRRC17, IGFBP3, HSPG2, SPARC, CD44, ITGA3, NID1, TCF7L2, VCAN, ADAM9, RPSA, RHOB, NOTCH2,SERPINE1, NME1, EPHB3, PLAT, BSG, PAK1
AMIT_SERUM_RESPONSE_120_MCF10A	0.479497	1.71947	0.0013459	0.0276793	65	62	IRS2, MREG, RAP2B, EDN1, TRIM21, GCNT1, DAPP1, CDR2L, PLAUR, SERBP1, SOX9, ETS2, DUSP10, NEDD9, EZR, BMP2, CD55, SUN1, KLF5, IFIT5, ID3, RND3, ATP8B1, RYBP, SPHK1, KLF4, MNT, FEM1B, MCL1, CIZ1, MAFF, TESK1, LIF, PDLIM5, ID2, SCHIP1, KLF10, JUNB, SIK1,PPP2R5D, PLAGL2, GBP1,MAP3K14, CLCF1, CXCL10, ID1, PIM1, YRDC, CDKN1C, FERMT2,C3orf52, STX12,SERTAD3, CSTF2, PDZD2, KRT10,GADD45B, ESRP2,GADD45A, BC…
POOLA_INVASIVE_BREAST_CANCER_DN	0.432433	1.71836	0	0.0277708	134	120	FABP7, KRT17, ECE1, STC2, FLNB, KDM4B, PKP1, LAMB3, TESC, BST2, XYLT2, SERPINA3, FRZB, ITGA7, SEZ6L2, GRIA2, EXOC7, CACNA1D, DKK3, TP53I11, PDGFA, ITGA3, MYB, INPP4B, TPM2, WFDC2, MGP, FRMD4A, CELSR1, CD151, PPP1R3C, VTCN1, SORBS2, LTBP3, CELSR2, SYNM, CRLF1, CNN1, MYLK, KCTD2, OXTR, CHI3L1, CPB1, IGF1R, TF, SSH3, SLC25A37, ITPR1, IGFBP2, EREG, ANKH, CLEC3B, STC1, LTF, HBB, FGFR3, KRT5, RABGAP1, …
REACTOME_SIGNALING_BY_NOTCH	0.447921	1.71742	0.0012151	0.0279958	103	94	HEY2, CCND1, NOTCH3, DLL4, JAG2, NCSTN, HEYL, E2F1, HEY1, DTX2, TP53, NOTCH4, JAG1, MAML3, TLE1, SNW1, MFNG, ADAM17, HES5, RBPJ, FBXW7, UBA52, RPS27A, TMED2, NCOR2, APH1A, HDAC7, DLL1, ARRB2,POGLUT1, ATP2A2, DTX4, TLE2, MAML1, NOTCH2, MYC,ST3GAL3, MIB2, POFUT1, CUL1, ATP2A3, ADAM10, APH1B, HDAC9, JUN, MAML2, HDAC2,TBL1XR1, CREBBP, HDAC5, SEL1L, RFNG, MAMLD1, RAB6A, HDAC1, HDAC3, FURIN, EP300, TNR…
KEGG_AXON_GUIDANCE	0.430722	1.71624	0.0023529	0.0282306	129	122	SEMA5B, EPHA3, EFNA3, LRRC4C, NFATC4, UNC5B, GNAI2, EFNA5, CXCR4, SEMA4B, ITGB1, NCK2, FES, SEMA3F, PLXNA3, MAPK3, SLIT3, PAK3, SEMA6B, EFNA4, NCK1, PLXNA1, EFNB2, LIMK2, DPYSL2, PLXNA2, FYN, GNAI3, NRP1, SEMA4C, ROBO1, MET, RAC1, EFNA1, NFATC1, EFNB3, RHOA, UNC5A, SEMA6A, PPP3CA, PTK2, SRGAP2, SEMA4F, EPHB6, ROBO2, PLXNB2, ROCK1, EPHB4, NRAS, PPP3R1, PPP3CC, RAC2, EPHA2, NFATC2, SEMA6C, EPHA6, A…
LINDSTEDT_DENDRITIC_CELL_MATURATION_C	0.471932	1.7153	0.0025707	0.0284207	69	66	CD200, IL4R, LGALS9, MCM5, C10orf10, S1PR1, ARID5A, ALOX15B, PIAS3, STK39,TNFRSF11A, TOPBP1, NID1, MUC1, CX3CL1, ZEB1, N4BP2L1, TCF3, LY75, TRADD, TBC1D8, PLAGL1, MGLL, TNFSF4, CCR7, JAK1, CASP3, CD86, TRIP10, NFIL3, RGS1, HLA-DPB1, IGF1R, ANXA3, CTNNA1, GTF2E2, PTPN1, UGCG, GPR171, STAT3, ENPP4, ATF3, IGFBP4, ROCK2, SEMA7A, TFRC, TRAFD1, COL14A1, LAD1, FLT3, KIF2A, CAPG, POLR2E, GRSF1, FERMT2, M…
PID_LYSOPHOSPHOLIPID_PATHWAY	0.475845	1.71393	0.0012987	0.0287345	66	63	ADRA1B, ADCY3, MMP9, GNAI2, ADCY8, GNB1, PLD2, RELA, ADCY7, GNAI3, LYN, GNA12, RAC1, AKT1, LPAR2, GNG2, EGFR, GNA13, ADCY4, RHOA, PIK3CB, ADCY5, PTK2, ARHGEF1, CRK,SLC9A3R2, MMP2, CASP3, GNA15, NFKBIA, PLCG1, JUN, GNAQ, PLCB3, HRAS, TIAM1, PXN, ADCY6, GSK3B, FOS, GAB1, IL6, ADCY1, ADCY2, BCAR1, LPAR1, TRIP6, HBEGF, GNAI1, SRC, MAPT, GNAO1, NFKB1, ADCY9, GNA14, GNA11, PRKCD, GNAZ, PIK3R1, PRKCE, M…
PID_S1P_S1P1_PATHWAY	0.602436	1.71216	0.0047393	0.0292145	21	21	VEGFA, GNAI2, S1PR1, MAPK3,PDGFRB, KDR, GNAI3, RAC1, PDGFB, RHOA, SPHK1, PLCG1, ABCC1, PLCB2, ITGB3, GNAI1, PTGS2, GNAO1, MAPK1, ITGAV, GNAZ
PID_TCPTP_PATHWAY	0.504641	1.71109	0.0041609	0.02946	43	42	VEGFA, JAK3, ITGB1, SHC1, EIF2A, PDGFRB, RAB4A, KDR, INSR, STAT6, MET, EGFR, PTPN2, ITGA1, PIK3R3, PDGFB, PIK3CD, PIK3CB, JAK1, CSF1, CREBBP, LMAN1, KPNB1, PIAS1, SOS1, CSF1R, PTPN1, STAT3, STAT5B, GAB1, HGF, PIK3CA, PIK3R2, SRC,EIF2AK2, KPNA2, STAT1, PIK3R1, EGF, GRB2, ATR, STAT5A
KIM_ALL_DISORDERS_CALB1_CORR_DN	0.560686	1.71008	0.012987	0.0296255	37	27	DAPK2, INPP5D, CD40, IL1RAP, CHIT1,APOBEC3C, ROR2, SLC16A6, XRCC3, S100A4, SBNO2, CTSG, PXN, DDX11, GFI1, ANPEP, S100A8, HSD3B2, LHCGR, TM4SF5, ALX1,SLC22A13, RREB1, GADD45B,C10orf12, ALDH3A1, AQP7
PARENT_MTOR_SIGNALING_DN	0.504064	1.71025	0.0112676	0.029656	46	41	SLC26A10, KRT86, VEGFA, FHL3, RPL12, CD248, TGFB3, CRABP2, MYL4, ADAM19, BMP2, UBE2D2, WFDC2, MPRIP, PDGFB, CNN1, CXCL3, ITGAM, ELOVL5, EREG, SIGLEC7, POLR3G, SPN, TOX3, ALMS1, RGS16, EIF5, HGF, MMP24, DNAJC4, ENGASE, FGF2, CNTN1, SLC12A6, FGF5, ANKRD2, AQP6, LSM4, NRCAM, CEACAM1, SSX2IP
DANG_REGULATED_BY_MYC_DN	0.395791	1.70915	0	0.0298629	253	239	CD47, DDB2, CCND1, CSPG4, VEGFA, IL1RAP, PRKCDBP, TGFB1, JPH2, SFN, EDN1, SFXN3, CDKN2B, PAM, ADM, TPM1, ANXA4, NDRG1, VLDLR, ARHGEF7, GM2A, NXN, CAV1, ITGB1, PMP22,ARHGAP25, SEPT4, RPS23, SPARC, COL5A1, LAMC1, PLAUR, GBP2, MAPK3, PDGFRB, FSTL1, PEA15, CASP1, FN1, MYO1C, BDNF, CSK, FAM129A, COL1A2, COL1A1, TIMP2, LXN, LOX, RPS12, CAST, PDLIM7, CHAF1B, INHBA, PERP, CCNG2, SERINC3, RB1, VAMP3, GPM6…
KEGG_EPITHELIAL_CELL_SIGNALING_IN_HELICOBACTER_PYLORI_INFECTION	-0.391488	-1.74538	0	0.0300186	68	66	JAM3, RELA, GIT1, TCIRG1, ADAM17, CSK, LYN, NOD1, MET, RAC1, EGFR, CCL5, MAPK11, CASP3, ADAM10, NFKBIA, PLCG1, JUN, CXCL1, MAPK13, CDC42, IKBKG, TJP1, JAM2, MAP3K14, F11R, CXCR2, CXCR1, MAPK12, ATP6AP1, HBEGF, SRC, MAP2K4,ATP6V0A2, NFKB1, MAPK9,ATP6V1G1, IKBKB, PTPN11,ATP6V1G2, PTPRZ1,ATP6V1B2,ATP6V0E1,ATP6V0A1,ATP6V1E2, MAPK14, ATP6V0C,ATP6V1G3, MAPK8,ATP6V1B1,ATP6V0D2,ATP6V0A4, ATP6V1F,ATP6V1C1…
TONKS_TARGETS_OF_RUNX1_RUNX1T1_FUSION_ERYTHROCYTE_UP	0.417227	1.70686	0.0011601	0.0304061	157	149	ALDH1A2, PTP4A3, MALL, PPARD, IL1RAP, CD200, JAG2, GPR20, NETO2, GPNMB, CD1D, CXCL5, ANXA2, PLK2, NDRG1, PXDN, JAM3, TNNT1, ERG, DENND5A, TUBB6, LAMC1, ARAP3, GBP2, IFI44, MAPK3, CD180, ARL4A, TM4SF1, MYOF, SLC1A3, PHLDA1, TRIB3, PDGFA, COL1A2, IFI16, CD79B, ATXN1, LILRB1, TCF7L2,ADAMTSL4, PNRC1, FNDC3B, DDR1, IFI6, VCAN, TREM1, IRAK3, LRP3, DNASE2, EXT1, EMP1, LAIR1, DHRS9, OAS2, SLC15A3, SSBP2,…
ONO_FOXP3_TARGETS_DN	0.517859	1.70708	0.0042735	0.0304249	42	37	E2F1, IL4R, CASP4, HNRNPA1, CXCR4, P2RY14, CASP1, RUNX3, TCF3, IL17RA, CDK6, CCL5, CCNA2, RUNX2, CDKN1A, BCL2, CD84, CCNF,TNFRSF25, SLAMF6, TNFSF8, RBL1, GZMA, CXCR6, FASLG, GPR171, IRF4, EOMES, IGFBP4, FOXN3, FFAR2, HAVCR2, SELL, SEMA4A, PARP1, RBL2, TGFBR3
PETROVA_PROX1_TARGETS_DN	0.4715	1.70478	0	0.0308342	64	62	PDLIM4, AHNAK2, APBB2, ARHGDIB,ARHGAP22, TPM1, FAP, NNMT, ITGA5, GBP2, CD44, AXL, MMP14, KRT7, TRIM22, RNASE1, ICAM2, PROCR, NRP1, STAT6, LY75, RRAS, VCAN, LYL1, EMP3, LTBP2, ARL6IP5, RGS4, SRPX, RAC2, TRAM2,SERPINE1, NUAK1, SRGN, LPXN, ANXA6, GLCE, PRNP, SMURF2, IL6, PLA2G4A, IL32, TANK, SLC38A6, CD59, IGF2BP3, CCL2, CAP2, MLLT11, SELP, TFEC, BMP6, FAM107A, PFKM, TCN2, NRCAM, PLAU,MAPKAPK3, LDHB…
PID_IL4_2PATHWAY	0.473712	1.70516	0.0039164	0.0308764	65	57	IRS2, INPP5D, IL4R, JAK3, ETS1, FES, SHC1,RPS6KB1, COL1A2, COL1A1, MYB, SOCS5, IRS1, STAT6, AKT1, CEBPB, CCL17, BCL6, SPI1, PTPN6, SP1, JAK1, GTF3A, MYBL1,IL13RA2, DOK2, CBL, CCL26, THY1,IL13RA1, SOCS3, AICDA, IRF4, LTA, STAT5B, BCL2L1, FCER2, CD40LG, PARP14, IL10, IL2RG, EGR2, ITGB3, ARG1, TFF3, PIK3CA, SOCS1, SELP, HMGA1, CCL11, PIK3R1, JAK2, MAPK14, GRB2, PIGR, STAT5A, MTOR
TARTE_PLASMA_CELL_VS_PLASMABLAST_UP	0.387055	1.70439	0	0.0308963	398	331	CDSN, FLNB, CD40, NOS2, COL11A1, FSCN1, GPNMB, PPM1F, ENO2, IL4R, HRH1, MMP9, DMD, MCAM, RPL7A, PAM, CPA3, RUNX1, MDK, PTPRK, LGALS9, COL4A1, ADM, TPM1, MSX1, CHN1, FEZ1, FLT1, SDC1, SERPINA3, MMP16, FRZB, TGFB3, NOTCH4, SMPDL3B, RPS2, RPL28, CRABP2, RAPGEF5, FLT4, RPL37A, TBXA2R, CDR2L, CD34, APOC1, RPL18A, RPS18, CNTNAP1, RPL34, RPS11, RPL24, PCSK6, RBMS2, IFI44, IFI44L, ADORA3, TRIM22, FSTL1, …
LI_WILMS_TUMOR_VS_FETAL_KIDNEY_2_DN	0.492235	1.70481	0.0068027	0.0309016	51	49	TGFA, VEGFA,COL5A2,COL4A1,COL4A2, SDC1, FRZB, PMP22, RARG, AGRN,COL5A1, PELO, PDGFA, RUNX3, GNG11, INHBA,CX3CL1,IGFBP5, ALCAM, MYC, CDH11, FZD1, ITGA2, IGF1R, DDR2, LHX1, TIMP3,TGFBR2,IGFBP6,ANGPT1, KLF10, CDH6, CDH1, RET,SEMA3C, ERBB2, AGT, THBS1, DPEP1, APOE, ITGAV, SPP1, GATA3, BMP7, DAB2, EGF, GPC4,TGFBR3, LETM1
MCBRYAN_PUBERTAL_BREAST_3_4WK_UP	0.402847	1.7035	0	0.0309893	214	195	FXYD3, ANO1, STC2, CSPG4, LGALS3, INHBB, FSCN1, GJA1, CDKN2B, RNF149, ALDOC, EDNRA, PDK1, CDH5, RUNX1, ACLY, PLK2, BMP1, KRT19, CD248, ADM, RASSF2, FGF13, GM2A, COL8A1, SDC1, EFEMP1, GSN, TGFB3, CYB5R3, CDCP1, C20orf27, TMEM2, MFGE8, SOX9, PGAP2, MMP14, SLC38A10, COPS2, KRT7, GABRP, FN1, CLDN3, ETS2, PHLDA1, PEAR1, LRRK1, CD55, FAM84A, MYB, PERP, ABCC3, TIE1, CLU, WFDC2, LRP5, RASSF3, TMEM109, KR…
DAZARD_RESPONSE_TO_UV_SCC_DN	0.427638	1.70382	0.0023725	0.030995	123	120	PTHLH, FOXJ3, AMD1, IL4R, FOXF2, ARHGEF7, DDIT4, ARL4C, KIFC1, ADORA2B, RBPJ, DUSP4, PCDHGB7, PAPD7, CNOT2, COIL, SIAH1, KBTBD2, EXT1, JARID2, NGDN, WEE1, ID3, RPP38, CASP8, PGRMC2, RYBP, RRS1, ISG20L2, ZNF133, FOXO3, CSTF1, FEN1, TNFAIP8, PHC2, RAPGEF2, TNFRSF1A, MTF2, MYC, ATP13A3, PATZ1, TRAM2, CENPA, HEG1, BAG5, CRKL, ZNF146, THBD, MORC3, SACS, MCL1, BRD1, MFAP1, TNFAIP3, NOP16, HMGA2, SIAH2,…
RICKMAN_TUMOR_DIFFERENTIATED_WELL_VS_MODERATELY_DN	0.446438	1.70357	0.0012407	0.0310328	110	88	KRT17, CDSN, PPARD, SFN, AFAP1L1, APBB2, TRAF3IP2, ANGPT2, CAV1, DUSP14, CDCP1, TUBB6, APLN, RAB31, GPR39, ETS2, LYPD5, PERP, PI3, CPA4, CYFIP1, ARRDC4, TEAD4, KRT14, PKNOX1, GOLGA7B, SQRDL, KLC1, AREG, ASCC3, EHD4, CDKN1A, WDR66, DMKN, H3F3B, OXSR1, RPS6KB2, CARD10, MAP4, DNAJB5, CARHSP1, WFDC5, CDC42EP2, AJAP1, PTGS1, KCTD5, SPTLC1, NEDD4, NRBF2, KLK10, PPP2R2C, LUZP1, PLEK2, AGPAT4, IFFO2, GPR…
REACTOME_INTEGRIN_CELL_SURFACE_INTERACTIONS	0.455399	1.7026	0.0012755	0.031249	79	77	LAMB2, IBSP, ITGB4, PECAM1, COL4A1, COL4A2,RAPGEF4,RASGRP2, ITGB1, ITGA5, JAM3, SHC1, LAMC1, VWF, ITGAX, ICAM2, FN1, CSK, COL1A2, COL1A1, ITGA3, ITGA10, ITGB2, AKT1, ITGA1, TLN1, LAMA5, PTK2, CRK, FBN1, ITGB5, ITGB8, ITGAM, ITGA2, ITGAL, ICAM3, ITGA8, ITGA9, SOS1, ITGA11, PTPN1, TNC, JAM2, RAP1B, ICAM1, CDH1, LAMA1, RAP1A, F11R, ITGB6,RASGRP1,APBB1IP, ITGB3, BCAR1, THBS1, SRC, LAMA2, ITGB7, VTN, …
PID_INTEGRIN_CS_PATHWAY	0.560424	1.70182	0.0105263	0.0314007	26	26	ITGB4, ITGA4, ITGB1, ITGA5, ITGA7, ITGAX, ITGA3,ITGA10, ITGB2, ITGA1, ITGAD, ITGB5, ITGB8, ITGAM, ITGA2, ITGA6, ITGAL, ITGA8, ITGA9,ITGA11, ITGB6, ITGB3, ITGB7,ITGA2B, ITGAV, ITGAE
GOLDRATH_ANTIGEN_RESPONSE	0.389066	1.69918	0	0.0320453	346	332	LOC284023, LIG1, LGALS3, F2RL3, PLP2, C4orf3, PRDM1, DTL, ANLN, KIF4A, ANXA2, ITGA4, TPI1, ANXA4, PRDX4, MCM5, GAPDH, ITGB1, RAD51, CHAF1A, LGALS1, DENND5A, ANXA1, CDC45, TBL2, RELL1, PSMC3IP, LMNA, PRC1, MYL4, CD44, SYCE2, RFC5, BRCA1, CDKN2C, GNG10, MYADM, ASF1B, CDC6, SLC2A3, KIAA0101, MCM10, CASP1, CRMP1, ROM1, ITGAX, CD24, CTSD, IFITM3, TOPBP1, LXN, BATF3, CKS1B, FYN, KIF20A, CCNB2, RBM3, PE…
OXFORD_RALA_OR_RALB_TARGETS_DN	0.572292	1.69947	0.0179104	0.0321106	24	23	KRT17, HK2, VEGFA, FSCN1,SLC16A3, TPM1, AGRN,RNASET2, CLU,PPP1R3C, CNN1, SLC6A8, CALD1, TNS1, PALLD, PDE2A, TMOD3,METTL2B, CA12, NQO1, CD2AP, SLC4A2, PAK1
ZHANG_ANTIVIRAL_RESPONSE_TO_RIBAVIRIN_UP	0.538988	1.69918	0.0087977	0.032122	30	29	GJA1,PDLIM1, MDK, CD81, SOX9,IFITM1,IFITM3, APOL1, IFI6, CD99, IRF7, MX1, MYH11, IFI27, PIM2, CFH, C1R, TIAL1, C1S, KLK10, IFIT1, TFDP1, VTN, FGA,HSPA1A, STAT1, GPX2, ALDH2, ASS1
LIN_SILENCED_BY_TUMOR_MICROENVIRONMENT	0.44447	1.69818	0.0012579	0.0322839	108	93	KRT81, GRHL3, MALL, SYTL2, ARHGDIB, KRT23, CLIC3, STS, ENC1, DAPP1, GPRC5A, C15orf48, SOX9, DSC2, KRT7, GABRP, CST6, SCEL, PI3, INPP4B, SH3TC2, C10orf54, CLDN7, VTCN1, PLA2G16, EMP1, SAMD9, EPS8L1, RHBDL2, MUC16, DKK1, SLCO3A1, FUT1, FAM171B, IKZF2, ELF3, ANXA3,RAB11FIP1, KRT13, DAPK1, ADAMTS9, VSIG10, MYH14, EGR3, CAMK2N1, SIK1, CRIM1, EPB41L1, VGLL1, LCN2, GAS2L3, IL1RN, KLK10, FYB, VSTM2L, CTG…
REACTOME_G1_PHASE	0.527068	1.69787	0.0114943	0.0323025	38	35	CDKN2A, CCND1, CCND3, CDKN2B, E2F1, CDKN2C, CCND2, CKS1B, UBA52, RPS27A, RB1, CDK6, E2F2, CDK7, CDKN1A,PPP2R3B, CDK4, CUL1, CDKN1B,PPP2R1A, RBL1,PPP2R2A, CDKN2D, SKP2, MNAT1, TFDP1, E2F3, SKP1, E2F4, PPP2CA, CCNH,PPP2R1B, PPP2CB, RBL2, E2F5
DIRMEIER_LMP1_RESPONSE_LATE_DN	0.537003	1.6962	0.0071942	0.0327501	32	31	HPCAL1,ARHGDIB, RPS19, GAPDH, UBC, RPL29, RPS11, FAU, RPLP0, IFITM1, RPS5, ISG15, WNT6, ID3, LSM2, ARF5, PSMB9, ST5, WAS, RING1, CD27, MAP4K1, APOC4, CHI3L2, BTG1, TXNIP,HLA-DMA, PSAP, TAF10, COX8A, ASAH1
SPIELMAN_LYMPHOBLAST_EUROPEAN_VS_ASIAN_2FC_DN	0.593771	1.69493	0.0136571	0.0330073	21	20	TMPRSS3, CLEC2D, ADM, STS, CLEC2B, LPAR6, ARL4C, WFDC2, LEF1, NFIL3, CTSS, PDE4B, IL32, SLC2A5, DNAJB9, IGF1, PTPRO, CD38, EXOC5, MAN2A1
KEGG_PENTOSE_AND_GLUCURONATE_INTERCONVERSIONS	-0.497611	-1.73336	0.0028571	0.0330094	28	23	GUSB, AKR1B1,UGT2B15,UGT1A10, UGDH, UGT1A4, UGT1A7, UGP2, UGT1A9, DHDH,UGT2B10, UGT1A3, UGT1A8, UGT1A1, UGT2A1, XYLB, UGT2B4, UGT2B7, UGT2A3, UGT1A6, DCXR, RPE, CRYL1
INGA_TP53_TARGETS	0.623933	1.69507	0.0141066	0.0330213	17	17	IGFBP3, SFN, BBC3, TP53AIP1, BAX,TNFRSF10B, MDM2, SESN1, CDKN1A, PCNA, FASLG, CCNG1, IER3, FOS, PMAIP1, THBS1, GADD45A
SIMBULAN_UV_RESPONSE_NORMAL_DN	0.528723	1.69441	0.0115274	0.0331236	33	33	VEGFA, DUSP7, ITGB4, SF3A2, ENC1, PLEC, CNBP, PHLDA1, MARCKS, EGFR, AHNAK,PIP4K2B, EMP1, RBPMS, MYC, CCNF, MN1, MCL1, ITGA6, RBMS1, HAS2, CDH1, ID1, POLR2A, PRRC2C, THBS1, TP63, TACC1, PTP4A1, ADRB2, FAT2, GRB7,GADD45B
NAKAMURA_ADIPOGENESIS_EARLY_DN	0.510262	1.69374	0.01	0.0332046	38	38	IGFBP3, HAPLN1, TMEM47, TPM1, PRSS23, ITGA3, LOX, COL15A1, ACTG2, THBS2, LRP3, ABI3BP, ZNF133, MYH11, EDIL3, HCK, POSTN, RGS4, GLIPR1, CALD1, SERPINE1, NT5E, TIMP3, RAI14, IL6, STK38L, CYR61, IER2, PDE6D, EPOR, SRPK2, SERPINE2, ITGAV, COL9A3, VCAM1, GDF15, DAB2,TNFRSF11B
GARGALOVIC_RESPONSE_TO_OXIDIZED_PHOSPHOLIPIDS_RED_DN	0.558266	1.69392	0.0044444	0.033224	25	24	HLX,CLEC14A, NR5A2, EEF2K, GIMAP1, FAM78A, VGLL4, RALA,ZKSCAN4, CEP68, ZNF436, GIT2, SESN1, RAB11A, MAFB, FRY, SPTLC2, EPHA4,RHOBTB1, TXNIP, KLHL3, SAMD13, MLYCD, SUOX
BASAKI_YBX1_TARGETS_UP	0.388522	1.69268	0	0.0333884	290	271	NMU, DDB2, RFC2, CCND3, TUBB4B, FLNB, EHD2, SFN, GLI2, AFAP1L1, DTL, MCM7, ANLN, UHRF1, KIF4A, PLK2, GINS2, PMEPA1, MCM5, CAV1, TCP11L1, S100A3, RAD51, CHAF1A, PTRF, CDK2, TUBA1A, TUBB6, PSMC3IP, RNF26, PRC1, TYMS, ZNF71, AXL, PRSS23, OSMR, SLC7A5, SLC38A10, RFC5, DKK3, FANCI, ASF1B, CDC6, UBE2C, MCM10, MCM2, BDNF, TIMP2, MELK, DNAJC9, FLNA, KIF20A, CCNB2, PDLIM7, NDC80, PHF19, MKI67, CCM2, EMP2,…
OXFORD_RALA_OR_RALB_TARGETS_UP	0.494114	1.69291	0.0040431	0.033398	48	47	CCND1, EXOSC2, DTL, MCM7, MCM5, NONO, TYMS, CDC6, UBE2C, PLXNA1, MCM2, DNAJC9, LAS1L, CCNE2, AURKB, CENPM, RRM2, PSMD3, BIRC5, DKC1, FEN1, GNA15, TMEM97, H2AFX, TACC3, ZWINT, ASNS, MCM4, EXOSC4, BOP1, WHSC1, FARSA, CDK1, CCNE1, SAC3D1,METTL13, E2F3, HN1, HMGA1, STMN1, CDC25A,SLC20A1, ERI3, NET1, NINL, PGD, PPIF
NABA_ECM_GLYCOPROTEINS	0.409241	1.69199	0	0.0334196	196	164	LGI4, CTHRC1, LAMA3, LAMB2, IBSP, IGFBP3, LAMB3, VWA1, LAMA4, EFEMP2, FBLN7, THBS3, PXDN, EMILIN2, CILP2, EFEMP1, VWA2, WISP2, HMCN1, TGFBI, SPARC, AGRN, LAMC1, MFGE8, SLIT3, MATN3, IGFBP7, VWF, FN1, SNED1, PCOLCE, TNFAIP6, NID1, SPARCL1, CRELD1, FNDC1, NID2, THBS2, LAMC2, MGP, GAS6, LAMA5, LTBP3, MMRN2, ABI3BP, LTBP2, IGFBP5, AEBP1, MFAP3, ECM1, SMOC2, ELN, FBN1, EDIL3, POSTN, EGFLAM, NOV, SRPX,…
WHITFIELD_CELL_CYCLE_G1_S	0.420405	1.69205	0.0011574	0.0334747	147	130	CDCA7L, E2F1, TREX1, DTL, CDCA7, UHRF1, RNF113A, RUNX1, ACD, GINS2, FAM111B, MCM5, SDC1, CHAF1A, CASP2, EIF2A, VPS72, CLSPN, KANK2, CDC6, FANCG, MCM2, CTSD, TOPBP1, CEP57, WDR76, INSR, CHAF1B, E2F2, GINS3, CCNE2, MCM6, ATAD2, SPIN4, WDR90, NASP, UBR7, DSCC1, LNPEP, ZNF414, MNT,KIAA1147, BARD1, ADCK2, ORC1, MNX1, MSH2,IVNS1ABP, ANKRD10, DDX12P, MED31, RMI2, RECQL4, AP4B1, HOXB4, HRAS, INTS8, PCNA,…
RICKMAN_TUMOR_DIFFERENTIATED_WELL_VS_POORLY_DN	0.383441	1.69083	0	0.0337413	382	330	KRT17, PTHLH, COL5A3, KCTD11, EGLN3, CDSN, SNX33, GRHL3, RNF39, AHNAK2, PPARD, SLC2A1, EHD2, SFN, DOCK6, RAB38, AFAP1L1, DUSP7, C4orf3, PTGFRN, PRDM1, HRH1, PAM, CASP4, SH3PXD2B, TEX2, BMP1, CSNK1E, ADM, VLDLR, GM2A, C1QTNF6, TCP11L1, DUSP14, IMPDH1, SEMA4B, SDC1, PTRF, KCTD10, CDCP1, TUBB6, LDHA, LRRC8C, PLAUR, RAB31, CD44, TMSB10, SMTN, SLC7A5, TANC2, NDEL1, NPEPPS, AP3S1, EHBP1L1, RHOV,LOC1547…
TAKEDA_TARGETS_OF_NUP98_HOXA9_FUSION_3D_DN	0.562838	1.69024	0.0046368	0.0337882	31	25	ALOX5, CXCL5, ETS1, ENTPD1,RAPGEF5, TGFBI, FCGR2B, FCGR2C, IL7R, CD163, LIF,CLEC10A, MAFB, OSM, S100A9, PPBP, APOL4, RAP1A, S100A8, HGF, ALB, NDFIP2, GLUL, ATP10D, TEX15
STEIN_ESRRA_TARGETS_RESPONSIVE_TO_ESTROGEN_DN	0.507348	1.69039	0.0042254	0.0338161	41	38	ULK1, DTL, GINS2, MCM5, CHRNA5, RAB31, PRSS23, MYOF, CDC6, MCM10, MCM2, POLE2, GINS3, CCNE2, MCM6, ATAD2, CELSR2, NCAPG2, FEN1, WDHD1, MICB, RRM1, SACS, SMC4, PCNA, ASPH, NAB2, SKP2, RAI14, TMPO, BTG3, OLFM1, CAP2, CDC25A, ZWILCH,SLC27A2, MANEA, PAPSS2
PID_GLYPICAN_1PATHWAY	0.56133	1.68922	0.0090498	0.0339714	27	27	VEGFA, TGFB1, TGFB2, FLT1, TGFB3, FYN, LYN, GPC1, SMAD2, HCK, APP, FGR, PLA2G2A, TGFBR2, TGFBR1, BLK, LAMA1, FGFR1, PRNP, SLIT2, LCK, YES1, SRC, FGF2, TDGF1, NRG1,SERPINC1
STEARMAN_LUNG_CANCER_EARLY_VS_LATE_DN	0.47813	1.68942	0.0066756	0.0339747	61	54	RAP2B,RASGRP2, PTRF, APOC1, PIGT, ATG7, CTSZ, ITGAX, CTSD, PLD3, CTSK, LY75, CSF2RB, LRP5, LAPTM5, IQGAP1, SEMA6A, SND1, SMAP2, ADAM15, NOV, CD68, GJA5, AGAP3, CTSS, CLEC4A, PDIA4, MYO7A, SP4, CFL1, SAT1, AES, SNCB, MPEG1, CSTB, SOCS3, LRG1, TBL3, LCN2, CCL3,BCL2L11, PSMA4, ACP5, AXIN2, BASP1, USF1, AGPAT1, COTL1, SH3RF1, COX6B1, LPL, SPP1, SYK, F7
GENTILE_UV_LOW_DOSE_UP	0.543229	1.68791	0.0118694	0.0343039	27	27	RSL1D1, FDXR, PLK2, PCGF3, GPRC5A, CCDC86, ZNF263, SYF2, ISG15, TAP1, SMOX, CDKN1A, PPP1R8, SAT1, TOB1, SOX4, CSNK1G2, GTF2H4,HIST2H2AA3, CCNE1, PMAIP1, IL11, EFNB1, HSPA1A, GDF15, IFI30, BTG2
KIM_LRRC3B_TARGETS	0.538655	1.68751	0.0071839	0.0343567	30	30	EIF3E, GM2A, TAPBP, IFI44, IFI16, IFITM2, HLA-E, ISG15, TAP1, CCL5, OAS2, HLA-A, EEF1A1, IFI27, HLA-B, B2M, LYZ,HLA-DPB1, CXCL9, HLA-C, CXCL1,HLA-DQB1, FTH1, CD74,SERPINA1, IFIT1,HLA-DRB1, CD59, PSME2, C9
KEGG_LEISHMANIA_INFECTION	0.465046	1.68793	0.003856	0.0343725	72	66	TGFB1, NOS2, ITGA4, TGFB2, ITGB1, TGFB3, RELA, IFNGR2, MAPK3, ELK1,MARCKSL1, ITGB2, FCGR3A, TRAF6, MAPK11, FCGR1A, MYD88, PTPN6, JAK1, C3, FCGR2A, NCF1, ITGAM, IFNGR1, NCF4,HLA-DPB1, NCF2, NFKBIA, CYBA, FCGR2C, JUN, TNF, TAB1,HLA-DQA2, MAPK13,HLA-DPA1,HLA-DQB1, IFNG, HLA-DOB, HLA-DRA, FOS, TLR4, IRAK1,HLA-DQA1, IL10, MAP3K7, TLR2,HLA-DRB1, MAPK12, PTGS2, FCGR3B, IRAK4,HLA-DRB5, CR1, IL1B, NFKB1, …
REACTOME_PLATELET_ACTIVATION_SIGNALING_AND_AGGREGATION	0.403626	1.68657	0	0.0346285	208	186	DGKD, DGKA, F2RL3, VEGFA, TGFB1, GNAI2, PECAM1, TGFB2, RAPGEF4, RASGRP2, GNB1, P2RY1, F8, TGFB3, TBXA2R, PRKCH, SHC1, SPARC, ITPR3, PIK3R6, LCP2, MAPK3, TIMP1, GNG10, VWF, VEGFC, TRPC6, FN1, CSK, PDGFA, COL1A2, COL1A1, RHOG, ACTN1, FYN, GNG11, DAGLB, GNB4, GNAI3, CD63, ALDOA, CALU, LYN, PIK3R5, FCER1G, CLU, GNA12, RAC1, AKT1, GNG2, GNA13, TLN1, PIK3R3, GNGT1, MGLL, F2R, PDGFB, RHOA, PIK3CB, VEGFB…
WIERENGA_STAT5A_TARGETS_DN	0.403112	1.6853	0	0.0350097	213	186	MYEOV, CD47, CCND1, IRS2, VASH1, TMEM44, GUCY1B3, GJA4, PPM1F, DENND3, PECAM1, PDLIM1, RASGRP3, ETS1, SAMD14,SH3PXD2A, CXCR4, XYLT2, PRKD2, JAM3, CAPN11, LGALSL, GP6, DENND2C, ARAP3, PTGIR, CD93, EFHC2, NINJ2, VWF, EFNB2, TPM3, IFI16, SLC24A3, ACTN1, DOK3, LOXL3, GNG11, GFOD1, TPM2, NOTCH1, FERMT3, PLEKHO2, IL17RA, FCER1G, UBASH3B, PF4V1, MSRB3, ILK, SLC9A9, PSTPIP2, ADORA2A, TTK, DEPDC1, TLN1, C…
ABE_INNER_EAR	0.496285	1.68103	0.0088626	0.0364931	48	43	MT3, RPL32, RPL28, LHFP, RPS11, WNK2, ATP1A2, RPL35, RPS5, UBA52, PCDHGC3, CLU, MGP, RPS15, VAMP5, NENF, LRP1, USP11, ISLR, DGCR6, UBXN1, COL9A1, RPL21, DDR2, RAB1B, IGFBP6,C19orf53, RBP1, HYI, S100A13, FOXD1, TMX4, UTY, CCS, PTGDS, APOD, CA14, USH1C, COCH, COL9A3, ZBTB20, CRYM, PLEKHB1
PID_SYNDECAN_4_PATHWAY	0.535545	1.67996	0.0121212	0.0366271	32	30	LAMA3, MMP9, MDK, CXCR4, ITGB1, ITGA5, FN1, ACTN1, RAC1, CCL5, ADAM12, RHOA, PTK2, FZD7, TNC, DNM2, TFPI, LAMA1, FGFR1, SDC4, THBS1, PLG, SDCBP, FGF2, F2, GIPC1, PRKCD, PRKCA,NUDT16L1, CXCL12
MURAKAMI_UV_RESPONSE_6HR_DN	0.579972	1.68017	0.0225225	0.0366535	21	20	RFC2, TGFB1, ACAN, TGFB2, NOTCH4, RARG, DSC2, IFI6, KRT14, EDN2, KRT13, EGR1,MAP3K14, IL6, ITGB7, VTN, KRT10, CDK5, SMO, NINJ1
KINSEY_TARGETS_OF_EWSR1_FLII_FUSION_DN	0.383894	1.67942	0	0.0366767	329	307	MAP2, ECE1, LRRC17, EPHA3, LAMB2, RGS5, FLNB, QSOX1, DLX1, LAMA4, GPNMB, C4orf3, FKBP9, VIM, EBF1, DPP7, COL5A2, MEF2C, ELP2, THBS3, FAM46A, ADM, TGFB2, RILPL2, SIPA1L2, CHPF, CLEC2B, XYLT2, MEF2D, GSN, LGALS3BP, TBC1D22A, DACT3, ZNF423, SEZ6L2, HMCN1, SPARC, COL5A1, LMNA, LAMC1, KLHDC8B, LPAR6, PRSS23, ADAMTS5, TANC2, MAN2B2, ARHGAP29, TRO, PBXIP1, IGFBP7, FSTL1, FN1, PHLDA1, ITM2C, CTSD, COL1A1…
SPIRA_SMOKERS_LUNG_CANCER_DN	0.593499	1.6796	0.0171073	0.0366884	22	19	DUOX1, RPL35A, TSR1, LMO4,DCLRE1C, ZNF611, ZNF160, ATP8B1, CCDC81, MZT2B, PRR11, SPN, ALMS1, NUCKS1, ZNF721, GTF2H3, ZC3H7B, COX5B,STAG3L1
PUJANA_XPRSS_INT_NETWORK	0.404894	1.68025	0	0.0367142	168	165	CD47, SLC7A1, SNRPA, TAF11, AATF, RPA1, MCM5, EIF3H, CHAF1A, CASP2, MYBL2,KIAA0922, BRCA1, CDKN2C, KIFC1, FANCI, UBE2C,KIAA0101, NCK1, MCM2, BLM, TOPBP1, CEP57, PPP1CC, DNAJC9, RECQL, KIF20B, PLK4, RB1, NDC80, MKI67, TCF3, RFC4, SNRPB, AURKB, MCM6, GTSE1, FOXM1, BRCA2, DEK, CCNA2, HMGB2, TOP2A, NASP, SSBP2, EXOSC8, USP1, ILF3, DDX39B, ZNHIT3, EZH2, PPP2R5C, MTF2, ABCB7, CDC7, LMNB1, MAD2L1, CBX3,…
BIOCARTA_PML_PATHWAY	0.622033	1.67805	0.0174326	0.036955	17	16	PML, TP53, DAXX, RB1, SP100, FAS, RARA,TNFRSF1A,TNFRSF1B, PRAM1, SIRT1, TNF, CREBBP, HRAS, FASLG, SUMO1
KEGG_VASCULAR_SMOOTH_MUSCLE_CONTRACTION	0.425826	1.67813	0.0012225	0.0370204	115	100	ADRA1B, GUCY1B3, ADCY3, CALCRL, RAMP2, EDNRA, CACNA1F, CACNA1C, ADCY8, KCNMB1, GUCY1A3, PRKCH, ITPR3, PTGIR, PLA2G5, MAPK3, CACNA1D, ADORA2B, KCNMA1, PPP1CC, ADCY7, MRVI1, PRKG1, ACTG2, ACTA2, GUCY1A2, GNA12, ADORA2A, GNA13, ADCY4, RHOA, ADCY5, RAMP3, PPP1R14A, MYL9, MYH11, ARHGEF1, PRKX, MYLK, ROCK1, CALD1, PPP1R12A, PLA2G2D, CALM3, PRKACA, PPP1R12B, MAP2K1, KCNMB4, ITPR1, MYL6, GNAS, GNAQ, PLCB…
VANTVEER_BREAST_CANCER_METASTASIS_DN	0.425949	1.67748	0	0.0370314	121	112	CA9, NMB, NMU, LPCAT1, VEGFA, CP, SLC7A1, TMEM45A, DTL, MMP9, ESM1, PFKP, ADM, COL4A2, NDRG1, FLT1, PRC1, PGK1, FAM64A, SLC2A3, DEGS1, QSOX2, MELK, CCNB2, MAPRE2, NDC80, RFC4, CCNE2, MCM6, ATAD2, DEPDC1, EXT1, CENPF, DLGAP5, ASPM, TRIP13, SKA3, IGFBP5, BIRC5, HJURP, EZH2, BNIP3, BUB1, KIAA1147, MAD2L1, NUSAP1, SYNCRIP, RAB6B, CENPA, DIAPH3, IVNS1ABP, C11orf96, MTDH, SACS, SMC4, GMPS, CD163L1, SPC…
LIU_SMARCA4_TARGETS	0.468999	1.67725	0.0051948	0.0370382	64	59	TMEM130, ANGPTL4, BST2, EBF4, LGALS9,SH3PXD2A, SPRY4, TAL1, GPRC5A,LGALS3BP, SPARC, ITPR3, PEA15, IFITM1, IFITM2, PLN,C10orf54, AHNAK, PARVA, COL3A1, KLHL6, ID3, ECM1, TAGLN, IFI27, MMP2, EGFLAM, CD53, ZFPM2, MFAP5, ATP8A2, UPP1, CAMK2N1, MKX, BCAM, S100A13, IL32, PODXL, IGF1, LRRC61, CCL2, CRYAA, PIPOX, SLC15A2, EFHB,C1orf204, LPCAT2,KCNQ1OT1, NUPR1, NOS1, EHBP1, ATP8B5P, CRYAB, CA10, DHRS3, GDF…
SANA_RESPONSE_TO_IFNG_UP	0.447192	1.67829	0.0024845	0.0370401	78	75	ST8SIA4, IDO1, BST2, SSPN, LGALS9,LGALS3BP, SEPT4, APOL2, IFI44L, GIMAP7, MLKL, TRIM22, CASP1, HLA-E, APOL1, CX3CL1, IL18BP, UBE2L6, DTX3L, OAS2, VAMP5,SLC25A28, HLA-A, PPP3CA, MX1, HLA-B, MMP25,SERPING1, RNF213, SAMHD1, GBP4, PARP9, NLRC5, CXCL9, APOL3, HLA-C, DDX60, LIPG, CFH, ETV7,HLA-DPA1, IFIH1, CXCL11,HLA-DQB1, GOLM1, OAS1, GBP3, IFI35, GATA5, SAMD9L, GBP1, APOL4, PARP14, CXCL10,HLA-DQA1, C…
ROZANOV_MMP14_TARGETS_UP	0.388845	1.6775	0	0.0371087	266	251	LRRC17, CSPG4, TTYH2, WDR86, KRT86, MAGED4B, TMCO4, TMEM44, TMEM45A, LAMA4, EFEMP2, ALDOC, ENO2, PLXND1, CDCA7, GMFG, PDLIM1, MDK, PLK2, COL4A1, CHSY1, SERPINH1, COL4A2, TPM1, PXDN, MSX1, EMILIN2, FEZ1, NXN, C1QTNF6, DOK1, NNMT, ISG20, EFEMP1, LGALS3BP, FLI1, JAG1, CDCP1, COL6A2, COL5A1, FKBP1A, DDIT4, FKBP7, MMP14, LMBR1L, CHST15, IGFBP7, RCC1, ICAM2, FN1, IFITM1, CCND2, TPM3, PCOLCE, NR3C1, IFI…
KAN_RESPONSE_TO_ARSENIC_TRIOXIDE	0.42112	1.67594	0.0024331	0.0373901	123	116	FABP7, PTHLH, STC2, HSPA6, SCG2, GPNMB, ENO2, MCM7, RIT1, CAV2, PLK2, ADM, NDRG1, HEY1, CLEC2B, JAG1, DDIT4, PGK1, ARL4C, ARHGAP29, FAM64A, EFNB2, PHLDA1, TRIB3, TSC22D3, CBS, KIF20A, GPM6B, VCAN, MGP, GRN, DLGAP5, RRM2, TOP2A, TRIM16, IGFBP5, BNIP3L, DPYSL3, DCBLD2, RGS4, LMNB1, MYBL1, SERPINE1, PPP1R15A, DKK1, VAT1, SACS, JUN, IL7R, SPC25, SLC7A11, NES, GFPT2, STC1, GPR65, ID2, NDP, ASNS, ATF3,…
RHODES_UNDIFFERENTIATED_CANCER	0.456256	1.67604	0.0037927	0.0374414	69	68	NUDT1, PRDX4, MYBL2, SLC16A1, TMSB10, SLC7A5, CDC6, UBE2C,KIAA0101, MCM2, COL1A2, TUBB, MELK, CKS1B, RFC4, H2AFZ, TAP1, MCM6, CCNB1, GAS6, FOXM1, DLGAP5, CCNA2, HMGB2, TOP2A, TRIP13, BIRC5, NCAPH, EZH2, MTHFD2, MAD2L1, KIF2C, CENPA, H2AFX, YBX1, CDC20, CDKN3, MCM3, NCAPD2, CXCL9, KIF14, SSBP1, PCNA, NME1, ADRM1, EIF2S2, CDK1, UBE2S, CCT6A, CEBPG, SEC61B, DPM1, PSMB7, KPNA2, KIF23, TUBB4A, CKS2, P…
BIOCARTA_ARF_PATHWAY	0.614172	1.67509	0.0063291	0.0376529	17	17	CDKN2A, E2F1, TP53,POLR1D, RB1, RAC1,TWIST1, MDM2, MYC,POLR1C, ABL1, TBX2,PIK3CG,PIK3CA,POLR1B,PIK3R1,POLR1A
BRUINS_UVC_RESPONSE_MIDDLE	0.438296	1.67452	0.0065703	0.0377959	98	83	SAP30, POLR1E, DYRK3, FDXR, RAP2B, SAP30BP, ULK1, CAMLG, ISG20, FCHSD1, TLE1, RBM43, ZNF622, PPM1D, GMIP, CHST11, USP27X, FBXO17, LIMK2, SEC24D, ZNF263, DDX41, IMP3, FBRS, PTK2, MSH6, ARVCF, DEF6, ZFPM1, ZSCAN29, GPR84, ELOVL5, TTC23, NSMCE2, ARMC10, TRIM13, OTUD4, KIN, ZFP64,C10orf88, MRM1, ZFYVE21, FGF18, PPP2R5D, DUSP11, ICAM1, ZXDC, CMTM6, TGIF1, WDR73, IFT43, NAA30, BTG1, TP53RK, DFFB, SAC3D…
DANG_MYC_TARGETS_UP	0.411691	1.67403	0	0.0379335	143	137	ADRA1B, RFC2, RPL10, MYCT1, NPM1, E2F1, RPL22, RPL5, MRTO4, RPL19, RPS6KA2, PA2G4, RPL32, NAP1L1, APEX1, RPL3, HNRNPA1, RPS19, RPL27A, GAPDH, TP53, EIF4B, BAX, RPL13, LDHA, TYMS, RPL26, UBE2C, RCC1, GNL3, RPS20, RPS13, CCND2, RPS5, LTA4H, RPS16, RPS17, EIF4A1, SNRPB, PTMA, H2AFZ, IRF9, CCNB1, MRPL10, EMP1, SRM, ENO1, NCL, CDC25C, RPL9, EXOSC8, BCAT1, RPL27, DKC1, SNRPD3, NME2, CBX3, SURF6, NRAS, …
GROSS_HYPOXIA_VIA_ELK3_DN	0.409326	1.672	0	0.038628	156	149	PDLIM4, KCTD11, LHX9, SLC2A1, VEGFA, PRKCDBP, EDN1, VWA1, GJA1, ETS1, PLK2, ADM, NDRG1, VLDLR,C10orf10, JAG1, CD44, CD93, TM4SF1, RBPJ, DUSP4, NEDD9, IFI16, FBXO42, ALDH1L2, PNRC1, CACNA1H, HIGD1A, CEBPB, SMOX, TRAF6, DHRS9, OAS2, MYH9, RAMP3, ENO1, ATF4, CARS, BHLHE40, RARS, KLF4, C3, CHIC2, MTHFD2, MYC,SLC39A14, NFIL3, KLF6, BCL10, SLPI, ASCC2, VANGL2,PPP1R15A, THBD, CXCL6, RIOK1, ERRFI1, NFKBI…
KEGG_VIRAL_MYOCARDITIS	0.463359	1.67033	0.0053191	0.0391804	73	62	HLA-G, CCND1, CD40, DMD, SGCA, CAV1, BID, ITGB2, CD55, FYN, HLA-E, ABL2, CXADR, RAC1, HLA-F, MYH9, PRF1, CASP8, HLA-A, MYH11, HLA-B, CASP3, SGCB, CD86, RAC2, ACTG1,HLA-DPB1, ACTB, CD80, MYH3, ITGAL, HLA-C, ABL1,HLA-DQA2, MYH15,HLA-DPA1, CD28,HLA-DQB1, MYH14, HLA-DOB, HLA-DRA, ICAM1, CD40LG, SGCD,HLA-DQA1, DAG1,HLA-DRB1, MYH7B, EIF4G2,HLA-DRB5, LAMA2, RAC3, HLA-DMA, MYH13, HLA-DMB, EIF4G3, HLA-DOA…
XU_HGF_SIGNALING_NOT_VIA_AKT1_6HR	0.543888	1.66985	0.0151057	0.0392506	26	26	HPCAL1, ANGPTL4, LSR, PLAUR, CD44, SMTN,TNFRSF10B, RPS20, PHLDA2, JUN, ERCC1, SAT1, ASAP2, UPP1, PRSS22, MAMLD1, PXN, NAV3, SMURF2, HBEGF, IL6ST, PFKFB3, DNMBP, EHD1, PLAU, LSS
KEGG_GLIOMA	0.465449	1.66959	0.005298	0.0392713	65	61	TGFA,CDKN2A, CCND1, SHC2, E2F1, TP53, SHC1, PTEN, MAPK3,PDGFRB, PDGFA, RB1,PIK3R5, CDK6, E2F2, SHC4, AKT1, EGFR,PIK3R3, MDM2, PDGFB,PIK3CD,PIK3CB,CDKN1A, NRAS, CDK4, CALM3, IGF1R,MAP2K1, AKT3, PLCG1, CALM2, HRAS, SOS1,MAP2K2,PIK3CG,PIK3CA, CALM1,CAMK2D,CAMK2A, IGF1,PIK3R2, E2F3, PRKCB,CALML3, KRAS, MAPK1,CAMK2G, ARAF, SOS2,PDGFRA, PRKCA, AKT2,PIK3R1, EGF, GRB2, RAF1,CAMK2B, BRAF, PLCG2, MTOR
REACTOME_GLYCOSAMINOGLYCAN_METABOLISM	0.426245	1.66829	0	0.0394819	111	98	CHST14, CHST9, CSPG4, HS3ST2, GXYLT2, ACAN, CHSY3,CSGALNACT1, CHSY1, B3GNT4, CHPF, SDC1, B3GNT7, B3GAT3, HSPG2, B3GALT6, AGRN, IDS, CD44, CHST3, BGN, CHST15, CHST11, CHST2, CHST7, GUSB, CHPF2, EXT2, VCAN, ST3GAL2, CHST12, EXT1, GPC1, SDC3,CSGALNACT2, IDUA, GPC6, HYAL2, HS2ST1, ST3GAL3, B4GALT2, BCAN, NDST2, NDST1, FMOD, HPSE, B4GALT7, B4GALT3, CHST1, SGSH, GPC2, GXYLT1, HEXB, HAS2, OMD, PRELP, LY…
BENNETT_SYSTEMIC_LUPUS_ERYTHEMATOSUS	0.544111	1.66844	0.0102339	0.0395086	31	28	LGALS3BP,APOBEC3C, AGRN, IFI44L, IFITM3, ISG15, TAP1, IRF7, OAS2, LY6E, MX1, XAF1, OASL,SERPING1, CKAP4, PLSCR1, MX2, RNASE2, C2, IFIT3, TDRD7, OAS1, IFI35, FPR2, S100A8, EIF2AK2, TNFSF10, STAT1
ALCALAY_AML_BY_NPM1_LOCALIZATION_DN	0.399257	1.66855	0	0.0395729	184	178	HPCAL1, MREG, SLC1A4, VEGFA, CD200, SEPT9, PLXND1,CSGALNACT1, CORO2A, TESC, TRIB2, KIF4A, FKBP1B, RPS6KA2, RPA1, HOMER2, CHAF1A, GSN, RGS10, C20orf27, CD34, SPARC, EVL, TYMS, NINJ2, CDKN2C, TSPAN13, KIFC1, PROM1, CDC6, IGFBP7, UBE2C, MCM10, IFITM1, MCM2, ITM2C, HNRNPD, IFITM2, POLE2, SERPINI1, CKS1B, CCNB2, RBM3, IL1R2, PBX2, INPP4B, MKI67, PTTG1, GPX7, EXO1, SERPINB6, TPX2, LY86, PLAGL1, CCNB1, …
RICKMAN_HEAD_AND_NECK_CANCER_B	0.496979	1.66756	0.005814	0.0396239	48	38	COL21A1, CDKN2A, LRRC17, NRXN3, COL11A1, CDKN2B, COL3A1, CLIC6, COMP, MFAP5, ZNF738, NRN1, SFRP4, OMD,HLA-DQA1, GTSF1, HRASLS,ARHGEF26, NLRP2, SYT1, OGN, USP9Y, EIF1AY, SOST, CNTNAP2, MUC15, UGT8, BBOX1, ELF5, COCH, BCHE, EYA4, IGSF11, PNMAL1, SPESP1, BEX1, PTH2R, GPC3
WANG_ESOPHAGUS_CANCER_VS_NORMAL_UP	0.425776	1.66771	0	0.0396508	121	108	ECE1, LAMA3, IGFBP3, SFXN3, MCM7, MMP9, TRIB2, PECAM1, COL5A2, ANXA4, PMEPA1, ENC1, SSR2, NOTCH4, ARID5A, CD34, LASP1, SPARC, PIGT, SMTN, PROM1, MYADM, IGFBP7, ICAM2, FN1, IFITM1, IFITM3, ANXA5, CALU, TCF7L2, CSF2RB, FCER1G, LAPTM5, COL3A1, HLA-A, CCR7, MMP7, IRF3, TBXAS1, COL6A3, TNFRSF1B, ITGAM, NME2, SERPING1, GALNT3, EIF1, IFNGR1, SERPINE1, TSPAN18, JUN, FMOD, SRI, PIM2, TNFAIP3, AGPAT2, CCL4…
MISSIAGLIA_REGULATED_BY_METHYLATION_DN	0.421029	1.66706	0	0.0397524	122	117	CDT1, LIG1, ITGB4, ANP32B, NRGN, SNRPA, HNRNPA1, FBL, MCM5, CAV1, RBMX, CDC45,RNASEH2A, PRC1, TYMS, RFC5, CDKN2C, TRIM28, KIFC1, CDC6, UBE2C,KIAA0101, RCC1, HMGN2, MKI67, RFC4, H2AFZ, CENPM, CENPF, ZNF175, FOXM1, DLGAP5, DEK, CCNA2, HMGB2, MDFI, PRIM1, CDC25C, RANBP1, EXOSC8, ILF3, MSH6, NCAPH, EZH2, NEK2, LMNB1, NUSAP1, FOSL1, CYP2J2, KNTC1, RRM1, BUB1B, PSIP1, CDKN3, SMC4, GMPS, KIF14, CAD, ZWI…
JEON_SMAD6_TARGETS_UP	0.558975	1.66641	0.0139319	0.0399243	24	22	QSOX1,SERPINH1, TGFB2, RFTN1, DKK3, TIMP2, LAMC2, FILIP1L, FAS, PSMB8, MMP7, FBN1,SERPINE1, CSF1, JUN, PTX3, TRIO, THBS1, SERINC5, NRG1, UBD, TRIB1
CAIRO_HEPATOBLASTOMA_DN	-0.319916	-1.70829	0	0.0400212	267	238	TFR2, ANO1, FXYD1, CP, IL1RAP, IGFBP3, INHBB, ANGPTL4, IL4R, SLC43A3, FAM46A, ADM, NNMT, ANG, SDS,KIAA0922, XDH, CHST7, INPP1, ETS2, CBS, N4BP2L1, GRAMD4,SERPINB8, FCN3, MGLL, STAB1, EXT1, PLA2G16, GSTT2, RND3, C1RL, ECM1, SAA4, CETP, ZFAND5, SKAP1, TDO2, SORL1,SERPING1, FCGR2B, IL13RA2, NFIL3, CYP2J2, KLF6, MARCO,SERPINE1, EPHA2, SLPI, CFP, MCL1, PRG4, STARD5, MAP3K5, VIPR1, AKR1D1, CYP2C18, GPR…
CHEMNITZ_RESPONSE_TO_PROSTAGLANDIN_E2_DN	-0.301006	-1.70716	0	0.0400441	391	346	EPN2,TNFRSF10C, MACC1, UBXN10, CD200, NRXN3, SYTL2, TMEM43, HRH1, PTPRK, FAIM, RPS6KA2, MMP15, TRIOBP, ARL6IP6, SCMH1, FBXL16, WSCD1, RBMS2, PRR15L, SLC6A20, EDNRB, KRT7, PROM1, OPN3, AHR, EXOC4, CCND2, CNTN4, BCL11A, TNFAIP1, EZR, CST6, SUN1, OSBPL10, ABHD11, FAM110B, NRF1, CXADR, MET, CDK6, WFDC2, CLDN7, CLSTN1, PLA2G16, NFIB, EPS8L1, SUMF2, LMTK3, CCL28, PHACTR2, KLF4, PPFIBP1, CLIC6, MIR31HG,…
MAEKAWA_ATF2_TARGETS	-0.555186	-1.70565	0.0239362	0.0400457	24	16	PCNP, XRCC5, MSTN, CRP, SDF2, ZIC2, DDX3Y,VPS13C,SLC1A5, ASL, SIX4, LRRN1, CENPV, FMO5, FBXO3, CHL1
REACTOME_INHIBITION_OF_INSULIN_SECRETION_BY_ADRENALINE_NORADRENALINE	0.577381	1.66562	0.0108025	0.0401761	25	22	CACNB3, GNAI2, GNB1, GNG10, GNG11, GNB4, GNG2, GNGT1, ADCY5, GNB2,CACNB2, GNB3, ADCY6, GNGT2,ADRA2A, GNAI1, GNG5, GNG12, GNAO1, GNG7, GNG4, GNB5
HWANG_PROSTATE_CANCER_MARKERS	0.538728	1.66479	0.0131965	0.0404108	28	27	LGALS3, HSPA6, NDRG1, LGALS1, PTEN, CTNNB1, PGK1, EZR, FLNA, MUC1, CLU, ILK, MIF, CALR, AGR2, KPNB1, RAN, PIM1, FKBP5, RERG, AZGP1, TXN, WNT3, PHB, FBLN5, PARK7,SELENBP1
SEITZ_NEOPLASTIC_TRANSFORMATION_BY_8P_DELETION_UP	0.452296	1.66447	0	0.0404538	73	71	NMU, MALL, IDO1, PRR16, FAM46A, ISG20, GPRC5A, IFI44, IFI44L, EFNB2, CD24, COL1A2, CX3CL1, MAPRE2, ISG15, CLU, CCNE2, NR2F1, CCL5, SAMD9, OAS2, ABCG2, MX1, IFI27, KLF4, SORL1, NOV, OASL,CRISPLD2, EVI2B, DDX60, HPSE, MAGEA6, LIPG, ZC3HAV1, HERC6, MX2, TIMP3, PDLIM5, IGFBP6, ID2, SEMA3A, IFIT3, IFIH1, HS3ST1, CXCL11, NDP, ZFP36L2, ADAM28, OAS1, TMEM50A, TLR4, PTN, GBP1, CXCL10, IFIT2, DAAM1, DDX58,…
KANG_CISPLATIN_RESISTANCE_UP	0.591015	1.66335	0.0139104	0.0408359	19	18	AHNAK2, IER5, MDK, FAM46A, GRN, CDKN1A, RAC2, SF3B3, MAFF, LZTFL1,METTL21B, IGFBP6, DALRD3, TFPI, FTH1, JUP, ZDHHC3, ATP7A
VALK_AML_CLUSTER_2	0.536215	1.66289	0.011976	0.0409236	29	27	PTP4A3, GLI2,ARHGAP22, MAP4K4, JAG1, GUCY1A3, EZR, CLU, GRB10, TRIM16, IL2RA, SRSF8, HBB, SCHIP1, GOLGA8B, GOLGA8A, TRPC2, LAPTM4B, HOXB2, PLA2G4A, PIM1, DOCK1, KCNK5, LPIN1, PLS1, PDE3B, HOXA5
ST_PHOSPHOINOSITIDE_3_KINASE_PATHWAY	0.50517	1.66206	0.0088235	0.040989	37	37	CDKN2A, INPP5D, SFN, A1BG, RPS6KA2, DAPP1, SHC1, PTEN, RPS6KB1, CD55, AKT1, YWHAH, YWHAQ, CYTH3, BTK, YWHAZ, AKT3, SOS1, YWHAG, YWHAE, IGFBP1, GSK3B, BAD, EXOSC1, PIK3CA, NR4A3, GSK3A,PPP1R13B, RPS6KA1, SOS2, FOXO1, AKT2, RPS6KA3, YWHAB, GRB2, IARS, PDPK1
TSENG_ADIPOGENIC_POTENTIAL_DN	0.494849	1.66208	0.0068681	0.0410637	46	43	NMB, HLX, SFRP2, GJA1, RAMP2, SIX1, COL4A2, TGFBI, CDKN2C, DKK3, EBF3, SPARCL1, NRP1, COL6A1, PHKA2, EPHB6, SESN1, COL6A3, CST3, THBD, PPL, AOC3, SNAI2, TSC22D1, IL1R1, RAB9A, LPAR1, FABP4, IL6ST, GSTT1, ADAM23, SMS, FMO1, CAPN6, POPDC3, HSBP1, ENPP1, CMBL, ITIH2, TSPAN6, GAS2,B3GALNT1, GHITM
BOWIE_RESPONSE_TO_EXTRACELLULAR_MATRIX	0.600472	1.66227	0.0109204	0.0410794	17	17	IFITM1, IFI16, IFI6, ISG15, PSMB8, IRF7, MX1,IFNGR1,PSMB10, PSMB9, IFIT3, OAS1, IFI35, IFIT2, IFIT1, IRF1, STAT1
REACTOME_G_ALPHA_Z_SIGNALLING_EVENTS	0.500283	1.66125	0.0098731	0.0412548	44	40	ADCY3, GNAI2, ADCY8, GNB1, PRKCH, GNG10, ADCY7, GNG11, GNB4, GNAI3, GNG2, RGS19, GNGT1, ADCY4, ADCY5, GNB2,ADRA2B, RGS4, GNAS, PRKCQ, RGS17, GNB3, ADCY6, RGS20, GNGT2, ADCY1,ADRA2A, ADCY2, GNAI1, GNG5, GNG12, PRKCB, ADCY9, GNG7, PRKCD, GNG4, PRKCA, GNAZ, PRKCE, GNB5
EINAV_INTERFERON_SIGNATURE_IN_CANCER	0.541909	1.66049	0.0215517	0.0413743	27	26	BST2, ERG, IFI44, IFI44L, SP100, IFI6, ISG15, IRF9,APOBEC3G, UBE2L6, OAS2, LY6E, MX1, SP110, MORC3, BRD3, RXRA, IFIT3, OAS1, IFI35, TGIF1, IFIT1, EIF2AK2, STAT1, ADAR, IFI30
SCIAN_CELL_CYCLE_TARGETS_OF_TP53_AND_TP73_DN	0.570925	1.66066	0.0166667	0.0413792	22	22	MCM7, CDK2, UBE2C,MAPRE2, MCM6, TPX2, GTSE1, CCNB1, CCNA2,CDC25C, MYC, CCNF, CDC20, CDKN3, AURKA, RAN, KIF22, DTYMK, KIF23, CKS2,CDC25B, G0S2
GARGALOVIC_RESPONSE_TO_OXIDIZED_PHOSPHOLIPIDS_YELLOW_DN	0.5864	1.66016	0.0078616	0.0414573	23	19	LPCAT1, PML, RNF145, GEMIN4, CCDC85B,C22orf29, PATZ1, B3GNT5, B4GALT5, PCTP, RGS3, ZNF18, DENND5B, RGL1, PIK3R2, ZNF827, ZMYND8, SLC30A1, TMEM50B
CUI_TCF21_TARGETS_UP	0.504853	1.65855	0.0055788	0.041757	37	35	SOX11, COL8A2, MDK, FAP, HOMER2, COL6A2, CCND2, COL6A1, VCAN, IGDCC4, COL3A1, HJURP, LHFPL2, ISLR, CDKN1B, IGFBP2, EMID1, CFH,SERPINF1, CLDN9, CDH6, HMMR, PTN, RBP1, LUM, MEG3, EPHA4, HDAC11, LBP, PHGDH, NCAM1, STARD10, DCN, CADM1, CYP7B1
KAUFFMANN_MELANOMA_RELAPSE_UP	0.455354	1.65895	0.0051948	0.0417638	61	59	RFC2, MCM7, GINS2, RAD51, CHAF1A, TDP1, CDC45, RFC5, BRCA1, CDC6, FANCG, BLM, PTTG1, RFC4, CTBP2, EXO1, BRIP1, MCM6, POLE4, CENPF, DEK, RRM2, XRCC2, TOP2A, EME1, MSH6, RAD18, MAD2L1, RAD54L, MSH2,RAD51AP1, MCM3, SMC4, POLQ, FANCA, CHEK2, NEIL3, XRCC5, PCNA, FANCD2, ORC6, PPIA, CHEK1, MCM4, SMC2, GTF2H3, GMNN, GTF2H2, PMS2P3, TERF1, OGG1, CCNH, SUMO1, RPA3, HUS1, DCLRE1A, RAD17, TFAM, ORC4
GRADE_COLON_VS_RECTAL_CANCER_DN	0.472942	1.65867	0.0054945	0.0417828	56	49	PTHLH, C15orf39, BICD1, ULK1, DUSP7, THBS3, RPL17, TAGLN2, FAM134C, PIAS3, POLL, FZD9, PHLDA1, RNASE4, TCF3, WFDC2, RAD23A, MPI, ID3, CRYZL1, MNT, DCLK1, FCF1, ANKRD40, CPSF7, LMNB2, KLRK1, PHLDB1, ADSSL1, ANP32A, FLYWCH1, QTRT1, C15orf41,HIST2H2AA3, FGF12, ANAPC5, PRICKLE4, VPS26B, ESPL1, SLC30A1, GRAMD1B, ANGEL1, KLK15, PCSK1N, ALDH1L1, SLC31A1, TMEM55B, EPB41L3, FRAS1
ONGUSAHA_TP53_TARGETS	0.520208	1.65908	0.0115774	0.0417965	38	33	FXYD3, DGKA, EFS, PHLDA3, TP53, DDIT4, RNASE4, PERP, ERCC5, ROBO1, COL18A1, TAP1, FAS, CSRP2, PITPNC1, MDM2, CDKN1A,TNFRSF18, ENPP2, CTSF, PLTP, SAT1, TOB1, CCNG1, ZMAT3, PQLC3,SERPINE2, SRXN1, LPIN1, NQO1, EPHX1, AK1, CTSH
QUINTENS_EMBRYONIC_BRAIN_RESPONSE_TO_IR	0.444675	1.65736	0.005291	0.0419513	84	76	PVT1, GRHL3, EDA2R, HPCAL1, RHBDF2, RAP2B, PHLDA3, PLK2, AEN, BBC3, ANO3, HMCN1, BAX, DENND2C, CPT1C, ZAK, PPM1D, ZNF365,TNFRSF10B, GGTA1P, ERCC5, TBC1D8, TAP1, FAS, GTSE1, IGDCC4, FOXO3, GPR75, CDKN1A, RAP2A, DDIT4L, KANK3, MAB21L3, ZBTB7B, CDC42BPG, APAF1, PRRG4, RNF169, TP53INP1, CCNG1, EI24, ZMAT3, PQLC3, C9orf116, PTPN14, TRAFD1, NR1D1, H2AFJ, PMAIP1, CGREF1, GNE, CKAP2, PDK4, BLOC1S2, AMPD2…
VECCHI_GASTRIC_CANCER_EARLY_DN	-0.308407	-1.69857	0	0.0419848	367	302	ST8SIA4, LRRC17, ALDH1A2, PDGFD, EBF1, DMD, TMEM47, VLDLR, TMEM100, EFEMP1, RGMB, UBE2J1, CLDND1, PRIMA1, P2RY14, RGS13, MAP7D2, ATP1A2, NR3C1, MCTP1, SERPINI1, SLC18A2, TSC22D3, SIDT2, PLN, ADA, GPM6B, PDGFC, ALDH1L2, HLF, UBL3, CLU, ARRDC4, RAI2, SHISA3,C14orf132, CCL5, SORBS2, SYNM, MDFIC, ITM2A, CNN1, LDB3, CYBRD1, RBMS3, IDUA, BNIP3, RGS4, SRPX, CPE, MAGEH1, ENPP2, SLAMF7, CASQ2, CHRM3, SYNP…
BIOCARTA_P53_PATHWAY	0.601174	1.65748	0.0207337	0.0419996	16	16	CCND1, E2F1, TP53, CDK2, BAX, RB1, MDM2, CDKN1A, BCL2, CDK4, APAF1, PCNA, TIMP3, CCNE1, ATM,GADD45A
REACTOME_AMINE_LIGAND_BINDING_RECEPTORS	0.612217	1.65658	0.0157233	0.0420235	38	16	HTR6,ADRA1B, HRH1, HTR1F,ADRA2B, CHRM3, HTR7, HTR2B,ADRA2A, HTR1D,ADRA1A, HRH2, DRD1, ADRB2, CHRM1, ADRB1
LEE_AGING_MUSCLE_DN	0.491923	1.65765	0.0083799	0.0420236	46	42	TNFRSF4, PTPRR, APBB2, PLA2G7, NDN, PMP22, PRKCSH, EEF1G, COL1A2, COL1A1, HNRNPD, BMP8B, RAI2, COL3A1, NR2F1, PSMB8, ENO1,S100A10, PPP3CC, CALM3, CDK11B, SIN3A, USP4, PSMC3, ADAM28, POLA2, PPP1R2, GFER, IL6ST, CLTB, PTH1R, DBP, WNT4, SCD, ABCB4, LONP1, PEX2, ZNF32,PPP2R3A, HSPA8, TST, FDFT1
MIKKELSEN_MCV6_HCP_WITH_H3K27ME3	0.376072	1.65681	0	0.0420473	435	300	SLC30A10, GABRD, TMEM91, HTR6, CRHR1, NTSR1, ATP2B2, SCN5A, NPTX2, PGF, FBXO41, KCNK15, HS3ST2, WDR86, PDE1B, RASL12, FAM163A, ACAN, SCN4B, GRID1, COL8A2, AFAP1L1, ECEL1, DYSF, ACVRL1, DBNDD1, MMP9, SLC6A1, EBF4, FIBCD1, FOXC2, P4HA3, C9orf172, GRIA2, TGFBI, HOXD11, APLN, PCDHAC2, WSCD1, CPNE5, ALOX12B, ELFN2, GRIN2C, CACNA1D, FOXF1, KRT7, RIMS4, JAZF1, KCNMA1, HES5, PSD2, TIMP2, BATF3, SLC18A2, …
KEGG_PATHOGENIC_ESCHERICHIA_COLI_INFECTION	0.47687	1.6554	0.0053691	0.0423837	59	53	TUBB4B, ITGB1, NCK2, TUBA1A, TUBB6, CTNNB1, ARPC1A, NCK1, TUBA1B, TUBB, EZR, FYN, HCLS1,ARHGEF2, ARPC5, TUBB3, RHOA, YWHAQ, NCL, CLDN1, ARPC2, LY96, ROCK1, ARPC4, YWHAZ, ACTG1, ARPC1B, ACTB, ARPC3, CTTN, KRT18, ABL1, WAS, CD14, CDC42, TLR5, TLR4, CDH1, ROCK2, TUBA3D, TUBA1C, TUBA3E, ARPC5L, TUBA3C, TUBB4A, TUBAL3, TUBA4A, TUBB1, PRKCA, TUBB2B, TUBA8, TUBB2A, WASL
PID_AVB3_INTEGRIN_PATHWAY	0.445542	1.65552	0.0038217	0.0424127	75	73	COL17A1, VEGFA, COL8A2, COL11A1, COL5A2, COL4A1, COL8A1, SDC1, COL6A2, COL5A1, MFGE8, MAPK3, RPS6KB1, FN1, COL1A2, COL1A1, KDR, IRS1, COL6A1, COL15A1, COL13A1, RAC1, AKT1, ILK, TLN1, COL3A1, RHOA, CASP8, COL7A1, PTK2, EDIL3, COL6A3, ROCK1, IGF1R, COL10A1, CSF1, CBL, CDKN1B, COL9A1, COL11A2, CSF1R, TGFBR2, COL16A1, PXN, COL12A1, VCL, F11R, COL14A1, ITGB3, PIK3CA, BCAR1, PI4KB, IGF1, SRC, VTN, FGF2…
URS_ADIPOCYTE_DIFFERENTIATION_DN	0.536097	1.65388	0.006135	0.0427621	30	30	PPARD, MMP9, COL4A2, SPARC, ROM1, FN1, LOX, THBS2, LRP5, LRP3, COL3A1, CD37, COL6A3, LOXL1, PPP2R1A, ZNF169, PTPRN, NUMA1, MED1,TMEM179B, LUM, OSGIN1, PSG9, CEBPA, AGTRAP, PTGDS, E2F4, ADORA1, DCN, SNN
BROWN_MYELOID_CELL_DEVELOPMENT_UP	0.405494	1.65342	0.0023202	0.0427732	165	145	HLX, QSOX1, SEPT5, PYGL, TREM2, ANXA4,CEACAM21, GSN, TGFBI, LASP1, RPL13, PLAUR, CD44, MAPK3, PLK3, XDH, DEGS1, ITGAX, CCND2, ESYT2, NFAM1, GLIPR2, RNASE4, ACTN1, ITGB2, RPS17, IL4I1, ANXA5, IL1R2, TYROBP, SP100,C10orf54, PSTPIP2, GRN, TNNT3, TRPM2, ZYX, PIK3CB, FCGR1A, MYO1B, IQGAP1, CD52, SLC15A3, S100A6, CAP1, CLDN1, CLEC5A, ALCAM, SIRPA, S100A11, C3, EDIL3,TNFRSF1A, STOM, HCK, FCGR2A, OLR1, C…
MIKKELSEN_NPC_LCP_WITH_H3K4ME3	0.482423	1.65396	0.0068493	0.0428223	58	48	TGM5, FABP7, CP, TRIM21, GAL3ST4, TREX1, GPSM3, GPR173, C1orf54, DAPK3, AKNA, MLC1, DDR1,SERPINB8, AMPD3, CYP2J2, MASP1, AKT3, EMILIN1, ECM2, PPP1R26, CAMK1G,TMEM176A, C2orf40, TIMP4, VWA5A,C20orf96, AGT, SARDH, RDH5, PTGDS, FGF1, PIPOX, ZSCAN2, MRPS21, GPD1,SLC25A18,ARHGEF11, PLCD4, FGD4, ZMYM2, IQUB, KCNIP3, SEC16B, KIF1C, GLRX,KIAA0232, CAB39
WEST_ADRENOCORTICAL_TUMOR_MARKERS_UP	0.584586	1.65345	0.0110585	0.0428507	21	21	NPTX2, DTL, PCSK6, PRC1,KIF20A, RRM2, TOP2A, ASPM, NEK2, BARD1,SLC2A6, STC1, PDE4B, SQLE, CDK1, IL32,PMAIP1, UBE2S, MED8, FGFR4, MVK
HELLER_SILENCED_BY_METHYLATION_UP	0.387897	1.65402	0	0.0428784	282	254	TNFRSF4, IRS2, CD200, IGFBP3, CHRNA1, IL3RA, FSCN1, OLFML2B, SEPT9, PML, GPNMB, MMP9, MCAM, PECAM1, RASSF2, LSP1, DAPP1, ISG20, RPS2, DENND5A, FAM49A, MAP3K6, APOC1, SPARC, AGRN, RFTN1, IFI44, IFI44L, ADAMDEC1, ARL4C, MYOF, MYO9B, RGS13, KRT7, TRIM22, OCA2, CLDN3, IFITM1,TNFRSF11A, ADAM19, TNFAIP6, MUC1, CCNG2, IL1R2, GPM6B, XIST, SYNPO, CSF2RB, ISG15, CLU, IRF9, LAMC2, IFIT5, APOBEC3F, CDC42EP4,…
SEKI_INFLAMMATORY_RESPONSE_LPS_UP	0.444098	1.65191	0.0012788	0.0432447	77	75	ADAMTS7, CD40, PTPRE, CASP4,SH3PXD2B, PLK2, CXCL16, NGFR, TMEM2, GBP2, CD44, OSMR, JDP2, BMP2, FAM84A, TNIP1, EGFR, FAS, CCRL2, RIPK2, BIRC3, SLC15A3, PRRX1, CXCL3, RSAD2, ZMYND15, FOSL1, NFKB2, GBP4, CXCL6, STX11, CSF1, NFKBIA, MAFF, TNFAIP3, EREG, PLSCR1, CXCL1, CXCL2, LIF, NFKBIE, ZC3H12A, EGR3, IER3, C8orf4, SLC4A7, EGR1, ICAM1, RND1, CCL3, GBP1, TSLP, NFKBIZ, CXCL10, BTG1, TLR2, BIRC2, SLCO4…
SWEET_KRAS_TARGETS_UP	0.441053	1.65157	0.0025478	0.0432971	84	80	ECE1, IGFBP3, ULK1, BMP1, COL4A1, COL4A2, TPM1, TGFB2, PMEPA1, LBH, NCK2, WISP2, TGFBI, HSPG2, SPARC, COL5A1, EVL, CHST3, DKK3, IGFBP7, ATP2B4, COL1A1, ADAM19, RSU1, ADCY7, INPP4B, SNAI1, COL7A1, CDH4, P4HA2, MYL9, TAGLN, BHLHE40, NLRP1, JAK1, GLIPR1, CALD1, SERPINE1, TNS1, ST5, NCF2, NUAK1, PGLS, JUN, MSC, WIPF1, PALLD, TIMP3, CLDN4, SOX4, MAP3K8, JUNB, MGEA5, C8orf4, SGK1, NPTX1, C1S, FLRT2, PD…
KEGG_NATURAL_KILLER_CELL_MEDIATED_CYTOTOXICITY	0.425522	1.65089	0.0024661	0.0433839	137	102	HLA-G,TNFRSF10C, SHC2, NFATC4, IFNAR2, SH3BP2, IFNGR2,TNFRSF10D, SHC1, LCP2, MAPK3,TNFRSF10B, ICAM2, BID, ITGB2, FYN, HLA-E, TYROBP, FCGR3A, PIK3R5, SHC4, FCER1G, RAC1, FAS, NFATC1, PIK3R3, ULBP2, GZMB, PIK3CD, IFNAR1, PIK3CB,TNFRSF10A, PRF1, HLA-A, PPP3CA, PTPN6, HLA-B, CASP3, KLRD1, NRAS, MICB, PPP3R1, IFNGR1, PPP3CC, RAC2, CD247, NFATC2, LAT, MAP2K1, VAV1, PLCG1, CD48, ZAP70, NCR3, TNF, ITGAL,…
DER_IFN_ALPHA_RESPONSE_UP	0.448193	1.65105	0	0.0433992	74	73	PML, TRIM21, BST2, BBC3, EIF2B1, IFI44, LIPA, TRIM22, VEGFC, IFITM1, IFI16, HLA-E, PLOD2, IFI6, ISG15, IRF9, TAP1, FAS, TEAD4, PSMB8, OAS2, CASP8, HLA-A, PPP3CA, MX1, SHFM1, B2M, OASL, NMI, PSMB10, SMAD4, IRF2, SP110, PSMB9, HLA-C, SSBP1, PLSCR1, MX2, TRIM14,COL16A1, XRCC6, IFIT3, RHOC,ZFP36L2, OAS1, IFI35, RBBP4, GBP1, C1S, IL6, BTG1, PSME1, DDX17, SRSF2, GMPR, PMAIP1, IFIT1, IRF1, PDXK, SKP1, S…
TENEDINI_MEGAKARYOCYTE_MARKERS	0.460262	1.65044	0.003963	0.0435178	66	62	CDKN2A, CCND3, VEGFA, TGFB1, IL3RA,RASGRP2, CXCR4, TAL1, FLI1, CDK2, TBXA2R, GP6, PDGFA, MYB, PDGFC, CCNE2, CCNB1, JARID2, CCL5, PDGFB,CBFA2T3, CASP3, MYC, BCL2, MPL, MCL1, CD9, CDKN1B, JUN,PIK3C2B, CXCL1, IL1R1, JUND, STAT3, IL6R, FOS, PPBP, BAD, IL6, MAFG, CDK1, CCNE1, ITGB3, NFE2, RASA1, ITGA2B, IL11RA, IL1B, IL11, BAK1,CBFA2T2, BCL2L2, GP1BA, STAT1, MECOM, JAK2, MAPK14, GATA2, CASP9, STAT5A, …
SCHAEFFER_PROSTATE_DEVELOPMENT_48HR_DN	0.374233	1.64951	0	0.0437281	428	375	SLC1A6, KRT17, PTHLH, FOXJ3, RIMKLA, NR0B1, SEMA5B, HLA-G, PLXDC1, EGLN3, MBD1, CHST9, SLC1A4,C15orf39, PDE1B, TGFB1I1, PCDH10, GUCY1B3, CHSY3, SLC16A3, DUSP7, ALDOC, EDNRA, PER2, KCNAB1, CDCA7, BST2, ITGA4,SH3PXD2B, RUNX1, PABPC4L, FAM46A, CD248, TCF4, RASSF2, SIPA1L2, LDB2, PMEPA1, NDRG1, COL8A1, MMP16, TGFB3,ARHGAP25, GUCY1A3, FAM49A, TGFBI, WNT9A, PTEN, RALGDS, CPXM2, LMNA, MEX3B, PDGFRB, NRP…
TSAI_RESPONSE_TO_RADIATION_THERAPY	0.5197	1.6497	0.0100719	0.0437439	32	32	VEGFA, BST2, COL4A1, TGFB2, LGALS3BP, COL6A2, VEGFC, IFITM1, COL6A1, IFI6, ISG15, OAS3, IGFBP5, A2M, COL6A3, SERPINE1, CFB, TGFBR2, HBB, TSC22D1, EGR1, CD69, IFIT2, IL6, CTGF, CYR61, THBS1, PLAT, SMAD3,TNFRSF11B, TGFBR3, LIPC
VARELA_ZMPSTE24_TARGETS_DN	-0.441931	-1.69175	0.0128205	0.0438063	38	34	CD1D, LASP1, PHLDA1, XIST, IFI27, OSTC, S100A10, INPP5B, ZAP70, CA3, VNN1, INMT,TMEM176A, FABP1,TP53INP2, FMO1, CCDC58, REEP6, IGFALS, ALDOB, G0S2, BPHL, RGN, AKR1C1, KLKB1, SLC31A1, EHHADH,C11orf54, ALDH3A2,HSD17B10, IDI1, CPT2, CAT, ALDH1A1
WESTON_VEGFA_TARGETS_12HR	0.521392	1.6478	0.008427	0.0441137	35	33	IGFBP3, SGCE, VIM, NNMT,COL5A1, BGN, BDNF,COL1A2, MGP, SP3, RHOB, ELN, MMP2,COL6A3,SLC6A8, OXTR, GEM, SAT1, DLEU2, THY1, TFPI2, FUCA1,ANKRD1, SDC4, MMP3, CFHR1, F2RL1, MEST, CCL2, UBD, VCAM1, DIRC2, AQP7
DIRMEIER_LMP1_RESPONSE_LATE_UP	0.463865	1.64838	0.0041841	0.0441245	57	55	CRIP1, CD40, SLC7A1, FSCN1, IL4R, FEZ1, RFTN1, CD44, SLC7A5, SWAP70, RHOG, RUNX3, MARCKS, TNIP1, CD58, LYN,SERPINB9, MDFIC, CARS, VOPP1, BATF, MTHFD2, ATP13A3,TNFRSF1B, TRIP10, CCL22, NFKB2, POM121, AHDC1, SPIB, PLEK, RPS28, OTUD4, NBN, ANP32A, PIEZO1, BZW1, CSNK1D, FASN, HMOX1, CFLAR, NFKB1, TRAF1, SRRT, HUWE1, SLC20A1, LITAF, ETF1, STIP1, STAT5A, IRF5, DHCR7, GARS, TUBB2A, SQSTM1
ISSAEVA_MLL2_TARGETS	0.464563	1.64816	0.0065963	0.044138	62	55	KRT17, CSPG4, CRIP1, LOXL2,PRKCDBP, LAMB3, DENND3, GSN, TAGLN2, COL5A1, AXL, FSTL1, CRIP2, TRIM29, NEDD9, AHNAK, A2M, ALCAM, MEOX1, LOXL1, DKK1, NT5E,SLCO3A1, CD9, PPL, HDAC9, C5AR1, HPSE, ELF3, FHL1, IGFBP6, SCHIP1, OAS1, IL18, PCDH7, L1CAM, BMP5,SLC16A5, FLRT2, VTN, SEMA3B, LMO1, TNNT2, SMAD6, NPR3, COL9A3, TNNC1, CADM1, TJP2, SNCA, DUSP9, PLAU,PPP2R2B, FABP3, ENO3
GEORGANTAS_HSC_MARKERS	0.448045	1.64789	0.0038911	0.0441643	71	65	PDGFD, GUCY1B3, PPM1F, BST2, FAM198B, CLEC2B, ROBO4, GUCY1A3, PRKCH, GIMAP6, GBP2, IDS, PBXIP1, HLA-E, INPP4B, HLF, CEBPB, HOPX, LIMCH1, BIRC3, CD52, CD37, RBPMS, PGM5, CYBRD1, KLF4, HIST1H2BK, RAPGEF2, MPL, KLF2, FAM30A, TIPARP, FOSB, MMRN1, HLA-DQB1, TFPI, MLLT3, HLA-DQA1,HIST2H2AA3, HIST1H1C, NRIP1, SPTBN1, HOXB3, IL6ST, HIST1H3H, H1F0, HIST1H3D, HIST1H2BD, CRHBP, HSPB1, HIST1H2BC, ATP8B4, NPR…
WILLERT_WNT_SIGNALING	0.557335	1.64622	0.015083	0.044487	24	22	CCND1, SLC2A1, GJA1, RPL27A, TLE1, EDNRB, UBE2D2, VCAN, GYPC, CSTF1, SNRPA1, NCOA3, ID2, NSMAF, ING1, MSX2, CITED2, ID2B, SRP19, GSTM3, EIF3J,TNFRSF11B
TOMLINS_PROSTATE_CANCER_DN	0.499562	1.64594	0.0192837	0.0445377	40	40	LGALS3, TGFB1I1, LAMA4, SGCE, ITGB4, PTRF, GSN, PMP22, SMTN, MYOF, ATP2B4, TPM2, DAAM2, CLU, CNN1, RBPMS, MYLK, SVIL, ST5, ZNF516,PPP1R12B, SEC23A, HMGN4, FHL1, SCRN1, MEIS1, VCL, CALM1, BTG3, CYLD, DST, MEIS2, TACC1, SPG20, AKAP12, LPIN1, PCP4, GAS1, GATM, C7
ODONNELL_TARGETS_OF_MYC_AND_TFRC_DN	0.486067	1.64649	0.0125523	0.0445382	45	44	TMEM107, C4orf46, CHAF1A, MYBL2, CDC6, POLE2, CKS1B, PLK4, AURKB, DEPDC1, CCNB1, CD151, MND1, CENPF, FOXM1, BRCA2, CCNA2, TOP2A, RANBP1, BIRC5,ARHGAP11A, BUB1B, CDC20, ERCC6L, FUS, DBF4, TOX4, SPC25, MYNN, KBTBD8, AURKA, TFRC, RAD1, WHSC1, CDK1, HELLS, G3BP1, SCD, DNA2, FAM181B, DEPDC1B, LRRC58, ACACA, FBXL21
GREENBAUM_E2A_TARGETS_UP	0.515679	1.64623	0.0174419	0.0445678	33	32	ANLN, KIF4A, TYMS, PGK1, SLC7A5, CDKN2C, CCNB2, PLK4, MKI67, TTK, CCNB1, CCNA2, TOP2A, BUB1, MAD2L1, NUSAP1, KIF2C,EIF4EBP1, H2AFX, SLC12A2, HS3ST1, KIF11, PTGS1, AURKA, RACGAP1, EPRS, ECT2, SCIN, FGFR2,KIAA1524, KLHDC2, CA2
WENG_POR_TARGETS_GLOBAL_DN	-0.488632	-1.68589	0.0087464	0.0448217	23	22	NAT6, GRN, MGLL, MTAP, ELOVL5, VNN1, EGR1, APOA4,HSD17B11, ATF5, RAD51B, RAB30, RETSAT,HSP90AA1, FGL1, CYP7B1, ACOT2, EHHADH, SLC22A5,HSD17B10, HSPH1, HSDL2
NAKAYAMA_SOFT_TISSUE_TUMORS_PCA2_DN	-0.374305	-1.68466	0	0.0448404	80	76	ANGPTL4, BST2, IFI44L, ATP1A2, DUSP4, SLC24A3, PLA2G16, PALMD, CETP, CLDN5, CASQ2, FZD4, LMOD1, SLC7A10, VIPR1, CD36, AOC3, CLEC3B, CFD, FOSB, PLA2G2A, PTX3, ANGPT1, TFPI2, ADIPOQ, TIMP4, PLIN1, PDK4, CEBPA, IGF1, ITIH5, FABP4, AGT, NPY1R, MEST, ABCA8, SVEP1, LIPE, TAC1, APOD, CES1, GPD1, MAOB, AKR1C2, PPP2R1B, NTRK2, LPL, RBP4, SEMA3G, NPR1, ABCC6, ADH1B, TNMD, CA4, GPX3, AKR1C3, G0S2, ADH1C, CH…
CASTELLANO_NRAS_TARGETS_UP	0.460459	1.64501	0.0093708	0.0448461	68	62	DLX5, GJA1, TMEM43, PHLDA3, ANXA4, LSP1, SDC1, CRABP2, BAX, CLEC11A, CRIP2, EXOC4, IFI16, PERP, CX3CL1, ERCC5, ISG15, MGP, TAP1, TRIM11, PSMB8, MMP13, B2M, IFI27L2, PLTP, CFH, PPP1R7, ZNF703, PTX3, IL13RA1, CCNG1, IFIH1, VNN1, PQLC3, IFI35, LCN2, GBP1, IL1RN, VPS25, ADCY2, IFIT1, ENPEP, SARDH, AIM1, FNDC3A, MEST, LBP, YIF1A, KCTD12,SERPINE2, NPR3, ZNF32, NQO1, STAT1, EPHX1, USP18, ITIH2, PCBD2, A…
SCHUHMACHER_MYC_TARGETS_UP	-0.368237	-1.687	0	0.0448771	80	77	EXOSC2, MXI1, IMPDH2, PRDX4, SLC16A1, LDHA, RCC1, RRP1B, SRM, RANBP1, RRS1, VRK1, MYC,SLC39A14, TMEM97, CDK4, ZNF239, FABP5, CAD, UCK2, RABEPK, CEBPZ, NME1, NOLC1, RPIA, POLR2H, PNO1, DHODH, ABCE1, TBL3, PYCR1,EBNA1BP2, VARS, PAICS, TFRC, FASN, BOP1, SLC39A6, DDX21, AKAP1, POLD2, AK4, NAMPT, DCUN1D4, GRSF1, MEST, PPAT, EXOSC7, SLC20A1, PRPS2, LRP8, TRAP1, SORD, NEFH, MGST1, AHCY, IARS, MTHFD1, UC…
KEGG_ALZHEIMERS_DISEASE	-0.322849	-1.68092	0	0.0450046	169	147	COX4I2,NDUFA4L2, NCSTN, CACNA1F, CACNA1C, GRIN2D, GAPDH, ITPR3, MAPK3, GRIN2C, CACNA1D, ADAM17, BID, FAS, BACE1, APH1A, LRP1, ATP2A2, CASP8, PPP3CA, CASP3,TNFRSF1A, CAPN1, PPP3R1, PPP3CC, NDUFS5, CALM3, ATP5G2, ATP2A3, ADAM10, APAF1, ITPR1, GNAQ, TNF, PLCB3, CALM2, APP, PLCB1, COX7A1, GRIN2A, FADD, CASP7, PLCB2, PLCB4, GSK3B, EIF2AK3, PSEN1, NDUFA7, BAD, APBB1, BACE2, NDUFS4, PSENEN, CALM1, ATP5D…
KANG_DOXORUBICIN_RESISTANCE_DN	-0.524407	-1.68302	0.0136986	0.0450499	19	18	ATP2B1, NCOA3, CEBPD, TJP1, CRIM1, RB1CC1, CLIC4, PTP4A2, TBL1X, NR1D2,KIAA1033, PSAT1, ASXL2, NFAT5, PCYOX1, SIKE1,TMEM106B, WWP1
ELVIDGE_HIF1A_AND_HIF2A_TARGETS_UP	-0.434365	-1.67896	0.0036101	0.0452586	41	39	CCND3, SLC24A3, CCDC86, SLC35C1, SRM, RRS1, GABBR2, CORO1A, RRP12, TAF9B, SLC29A1, RPP25, RET, SLC35B1,C14orf169, OSTM1, GYG1, ATP6V0A2, RFK, POLR3K, SOCS2, TOR3A, RPP40, SPAG1, LSG1, GCH1, FLAD1, STX3, CHKA, SLC25A44, ABCF2, C18orf8, SLC5A6, ADAT1, IDH3A, HSPA4, HSPH1, WDR77, CHUK
REACTOME_ABC_FAMILY_PROTEINS_MEDIATED_TRANSPORT	-0.467417	-1.68094	0.0131148	0.0453863	34	29	ABCC3, ABCA2, ABCC9, ABCB6, ABCA3,ABCA12, ABCC1, ABCG4, ABCA4, ABCD2, ABCD1, ABCB5, ABCG1,ABCA10, CFTR, ABCA8, ABCC2, PEX19, ABCA9, APOA1,ABCB10, ABCA6, ABCC6, ABCA7, PEX3, ABCC5, ABCD3, ABCC4, ABCB1
DING_LUNG_CANCER_MUTATED_SIGNIFICANTLY	0.543969	1.64253	0.0163447	0.0458326	26	26	CDKN2A, EPHA3, TP53, PAK3, KDR, INHBA, RB1, EGFR,ZMYND10, NRAS, GNAS, STK11, LRP1B, NTRK3, NF1, APC, ATM, FGFR4, LTK,SLC38A3, ERBB4, KRAS, NTRK1, PTPRD, PDGFRA, EPHA5
WESTON_VEGFA_TARGETS	0.423156	1.64225	0.0024242	0.0458551	108	99	PGF, RGS5, FHL3, IGFBP3, GJA4, SGCE, VIM, ANGPT2, FAP, CXCR4, NNMT, EFEMP1, ROR2, CD34, COL5A1, GALNT1, BGN, KRT7, ADORA2B, VWF, ICAM2, BDNF, COL1A2, KDR, HCLS1, ADD2, COL6A1, NID2, TIE1, VCAN, MGP, SP3, RHOB, RALA, IFI27, ZFHX3, ELN, MMP2, POSTN, COL6A3, SLC6A8, OXTR, CD9, GEM, KRT18, DYNLL1, CXCL1, SAT1, DLEU2, ART4,MPHOSPH10, THY1, PDE4B, HEMGN, LMO2, TFPI2, C1S, TRIM23, RBX1, SEMA5A, FUCA1, H…
LEE_LIVER_CANCER_DENA_DN	-0.386941	-1.6747	0.003876	0.0462402	74	61	GPR37, TRPV2, IL1RAP, NETO2, TNNI2, ALOX12B, MCM10, TNNT3, WNT10B, C4BPA, RORC, CA3, SLC1A2, CSAD, REG1A, PEX11A, NR1H3, PRODH, CYP2E1, HSD3B2, FABP1, PAH, CYP4F2, G6PC, DPYS, SLC2A2, HPD, BAAT, MAT1A, GSTO1, DMBT1, GLYAT, SLC27A5, PON1, ME1, GCDH, BHMT, ACADSB, AASS, NDRG2, CYP7B1, RGN, AKR1C1,SLC25A13, PCK1, HOXA5, DCXR, PHYH, EHHADH, OAT, ACOX1, LACTB2, ALDH3A2, ACSM3, EPHX2, LIPC, CPT2,SELENB…
REACTOME_ACTIVATED_NOTCH1_TRANSMITS_SIGNAL_TO_THE_NUCLEUS	0.547818	1.6408	0.0117474	0.0464071	27	24	DLL4, JAG2, NCSTN, DTX2, JAG1,ADAM17, UBA52,RPS27A, APH1A, DLL1, ARRB2, DTX4, MIB2,ADAM10, APH1B, PSEN1,PSENEN, MIB1, ARRB1, CNTN1, NUMB, DTX1, PSEN2, DNER
AMIT_SERUM_RESPONSE_240_MCF10A	0.467426	1.6404	0.0122283	0.046504	57	52	TGM1, TGFA, PGBD5, TGFB1I1, ANGPTL4, PHLDA3, ITGA5,CDC42EP1, TM4SF1, CD24, EZR, GABPB1, EMP1, CLDN1, PHLDA2, MAP3K11, EHD4, BLZF1, GLIPR1, ITGA2,SERPINE1, DKK1, PDLIM5, TJP1, FST, BCL2L1, CDH1, GBP1, TLR2, ITGB6, PRSS8, PCDH7, FBXL18, XBP1, ABLIM3, GRAMD3, B3GNT2, CLTB, TIMM44, PKP2, THBS1, CDKN1C, ALDH1A3, AKAP12, ADRB2, B4GALT4, HERPUD1, LRRC8B, MRPL33, ARHGEF3, PRKAG2,TNFRSF21
GAJATE_RESPONSE_TO_TRABECTEDIN_UP	0.453457	1.6394	0.0106952	0.046835	67	64	CRIP1, OLFML2A, GPNMB, CASP4, ANXA4, VLDLR, CXCR4, GSN, ANXA1, TUBA1A, TGFBI, CD44, TM4SF1, IGFBP7, CBS, CCNG2, NID2, ISG15, CLU, CSRP2, CLDN7, CARS, NUCB2, S100A4, CDKN1A, OASL, CPE, C4BPA, DDR2, HLA-C, TNFAIP3, SRGN, CFD, TAF15, FOLR1, UGCG, PROS1, ASNS, ATF3, FOS, C1R, GOLGA8A, GSTA4, IL6, IL18,TRAPPC6A, DUSP5, TXNIP, S100P, SEPT6, FGG, EML2, CLIC4, ARL6IP1, NUPR1, MYH10, PCK2, RGS2, GADD45A, …
MURAKAMI_UV_RESPONSE_6HR_UP	0.506244	1.6388	0.0086831	0.0468883	37	34	PGF, CASP4, PTPRF, XRCC1, TIMP1, SEPT7, CDC37, PFDN5, RAC1, ARHGDIA, TRAIP,TNFRSF10A, RND3, CDKN1A, NME2, CYTH2, MCL1, CD9, ERCC1, NME1, DSP, HOXD3, DAPK1, CASP10, TRAF3, EVPL, TRIP6, PRODH, CASP6, MAPK6, PLAT, SEPT2, GADD45A, MAPK14
SHEDDEN_LUNG_CANCER_GOOD_SURVIVAL_A12	0.382078	1.63893	0.0010977	0.0469369	317	242	NXPH4, KRT81, SPAG4, CD300A, PLXDC1, LZTS1, ARTN, SLC1A4, F2RL3, LRRC41, NLE1, EFEMP2, PRDM1, CACNA1F, PDK1, GNAI2, ITGB4, IFNAR2, PRDX4, PRMT2, SH3BP2, EML3, TCP11L1, TFAP2A, SH3D21, ISG20, ZNF473, UBE2J1,ARHGAP17, MBD2, ADORA3,ADAMDEC1, CD180, MMP14, FER1L4, PAK3, CHST11, CHST2, MED13L, NCK1,C19orf57, ICAM2, ITM2C, CCND2, WBP11, SEC14L1, NMNAT2, LDOC1, ABCC3, ZNF419,APOBEC3F, PTPN2, IRAK3, FKBP…
HAHTOLA_SEZARY_SYNDROM_DN	0.499167	1.63752	0.0085106	0.0472176	42	36	BST2, MATK, PRSS23, TSPAN13, GNLY, IL2RB,SERPINB9, HOPX, CCL5, GZMB, NKG7, CTSW, DLG5, SESN1, KLRD1, MYBL1, BCL2, CCL4, CD160, KDM2A, KLRB1, ZBTB16, NELL2, BACH2, IRF8, GZMK, SPON2, APBA2, IL18RAP, XCL1, PTCH1, NCAM1, DUSP2, VAV3, KLRF1, TXK
DUAN_PRDM5_TARGETS	0.441773	1.63715	0.0062578	0.0472683	79	71	POU5F1, PML, ENO2, EDNRA, EBF1, CACNA1C, RUNX1, TP53, EVL, PIAS3, DKK3, ETS2, CKLF, MYB, NOTCH1, CDC42EP4, PHC1, CD99, MYD88, CDH4, RUNX2, RARA, CLK3, WNT10B, NOTCH2, MYC, POU2F3, ADARB2, PPP1R12B, ZFPM1, ISLR, NLRC5, ISLR2, EMID1, GPR1, ID2, SOCS3, ACSBG1, TINAGL1,PALM2-AKAP2, GCK, SIK1, IL6R, FBXO33, PAX5, GABPA, NCOA7, RXRB, INTS3, OVOL1, EED, STK32C, APOBEC3B, S100A2, ARID3B, TCEANC, SNRNP48,…
LOPES_METHYLATED_IN_COLON_CANCER_UP	0.558301	1.63696	0.0104948	0.0472856	27	22	CDKN2A,TNFRSF10C, ITGA4, SCGB3A1, CCND2, DLEC1, HIC1, TWIST1, MT1A, IFNG, OPCML, RARB, APBA2, MGMT, RARRES1, APBA1, SOCS1, ESR1, MT1G, GAD1, ESR2, SFRP1
MARKEY_RB1_ACUTE_LOF_UP	0.383593	1.63752	0	0.0473082	235	224	MTCP1, CDCA7L,EPB41L4A-AS1, CDT1, DLX1, H19, E2F1, DTL, MCM7, ANLN, KIF4A, ANP32B, NAP1L1, MCM5, PABPC4, CAV1, RBMX, S100A3, RAD51, CDK2, CDC45, CD34, CENPK, PRC1, TYMS, RFC5, PRRX2, BRCA1, PDIA3, FAM64A, ASF1B, CDC6, KIAA0101, CRIP2, TUBB, TOPBP1, DNAJC9, CKS1B, KIF20A, CCNB2, CHAF1B, PERP, MKI67, RFC4, PTMA, H2AFZ, VCAN, TRIM59, FAS, CCNB1, GAS6, WWTR1, MDM2, BRCA2, DLGAP5, DEK, CCNA2, RRM2, HM…
REACTOME_SIGNALING_BY_INSULIN_RECEPTOR	-0.351853	-1.67068	0.005	0.047344	108	92	IRS2, SHC2, DOK1, EIF4B, SHC1, EEF2K, MAPK3, TCIRG1, RPS6KB1, TRIB3, RPS6, INSR, IRS1, GRB10, PIK3CB, CRK, RPTOR, NRAS,EIF4EBP1, TSC2, MAP2K1, STK11, TLR9, HRAS, SOS1, FGFR3, FGF18, MAP2K2, KL, GAB1, FGFR1, CDK1, PIK3CA, FRS2, PIK3C3, PIK3R2, FGF7, FGFR4, PRKAA1,ATP6V0A2, FGF2, TSC1, FGF1, PRKAB2, RHEB, KRAS, MAPK1, MLST8, CAB39L,ATP6V1G1, PRKAG1, EIF4G1, FGF5, AKT2, FGF9, STRADA, FGFR2, PIK3R4,A…
CASORELLI_APL_SECONDARY_VS_DE_NOVO_UP	0.493417	1.63526	0.0157368	0.0475011	39	37	TGFA,CSGALNACT1, ENTPD1, ENC1, LAMC1, SLC24A3, NID1, ANXA5, TRIM27, CLU, PLA2G16, CNIH4, KLF4, SLFN12, EVI2B, TM6SF1, MCTP2, FOSB, FCGRT, CEBPD, FOS, HDAC4, NAGPA, ARHGEF40, DPM3, PTGER2, SLC36A1, TMX4, SLC38A6, FBN2, MAVS, CAPN3, TFEC, GCA, FZD2, FAM105A, ZMYM6
PROVENZANI_METASTASIS_DN	0.407222	1.63541	0.0023502	0.047511	136	133	KRT81, PDLIM4, ANO1, CCND1, MALL, SLC2A1, IGFBP3, KRT23, GLTSCR2, TRIB2, TMED10, RPS19, COL4A2, TPM1, S100A3, PLOD3, TNNT1, EPAS1, CD44, GRK6, ARPC1A, ARL4C, SLC2A3, CLDN3, TRIM29, CCND2, IFITM3, TIMP2, IFITM2, TNIP1, VAMP3, RCN1, PDGFC, CLU, LAMC2, RRAS, EGFR, CLDN7, LSM14A, NFE2L3, P4HA2, PRMT1, S100A11, EHD4, NOTCH2, TSEN34, PON2, GPI, PPIC, FOXJ2, NMI, SPATS2L,SERPINE1, TPT1, PSMB9, TACSTD2, …
BENPORATH_ES_2	0.513608	1.63485	0.0143678	0.0475141	40	32	GJC1,POU5F1,DBNDD1, AEN, EPHX3, MYBL2, WSCD1, MCM10, GPR19, ETV4, DSCC1, NCAPH, ORC1,ERCC6L, CHEK2, TXLNG, PWP2,DNMT3A, L1TD1, RRP9,GOLGA7, DTYMK, HELLS, GDF3, PRKD3, RBM4, TDGF1, EPHA1,CDC25A, ORC2, HESX1,SLC5A6
TAKEDA_TARGETS_OF_NUP98_HOXA9_FUSION_8D_DN	0.390869	1.63566	0	0.0475575	205	181	CDH8, GXYLT2, KRT86, CAMK1D, IL3RA, GJA4, PLA2G7, GPNMB, CORO2A, HVCN1, ALOX5, MMP9, CXCL5, RPS6KA2, ETS1, FAM198B, ENTPD1, STAC, ENC1, MS4A2, TGFBI, EPAS1, LCP2, ADORA3, MMP14, PPP1R3B, AKAP13, RNASE1, JAZF1, CD24, KCNMA1, FAM129A, ADAM19, GLIPR2, SLC41A2, SLC16A6, ANTXR1, IL1R2, NRP1, CLU, TMCC3, ADAM9, EMP1, CD1A, FPR3, SLC11A1, BCL6, ITM2A, SRSF4, CLEC5A, CXCL3, CYTL1, RAPGEF2, SERPINB1, TDO2…
SWEET_LUNG_CANCER_KRAS_DN	0.369649	1.63546	0	0.047564	435	399	CRHR1, ST8SIA4, CD47, SOX11, CRIP1, FXYD1, VEGFA, CP, PRKCDBP, STMN2, EDN1, GUCY1B3, TMEM45A, BCL6B, CALCRL, RAMP2, FKBP9, GRK5, ACVRL1, SSPN, NDN, PECAM1, PAM, CDH5, PDLIM1, MEF2C, ADCY8, NT5DC2, ETS1, HNRNPA1, TCF4, TM2D3, HEY1, FOXF2, CXCR4, CAV1, FLT1, PTRF, S1PR1, GSN, NOTCH4, GIMAP4, PMP22, C3orf58, WISP2, SEPT4, TUBA1A, EPAS1, COL6A2, SPARC, INPP5A, MYL4, CD93, RASIP1, SLC7A5, PDGFRB, FOXF…
PID_AMB2_NEUTROPHILS_PATHWAY	0.490038	1.63364	0.0085106	0.0475704	41	39	MMP9, MST1R, JAM3, PLAUR, ITGB2, FYN, LYN, AKT1, TLN1, RHOA, LRP1, MMP2, HCK, AGER, ROCK1, ITGAM,SELPLG, TNF, FGR, THY1, HMGB1, JAM2, RAP1B, ICAM1, BLK, RAP1A, IL6, CTGF, LCK, APOB, YES1, SRC, PLG, NFKB1, SELP, PLAT, PRKCZ, MST1, PLAU
DAVICIONI_PAX_FOXO1_SIGNATURE_IN_ARMS_DN	0.58754	1.63607	0.0252765	0.0475756	20	18	IGFBP3, TRIB2, PLK2, TCF4, SPRY4, PHLDA1, DUSP4, TRIL, MSTN,ZFP36L2, MOXD1, ATP2A1, CCL2, PKIA, OLFML3, RGS2, NEFM, GAS2
BURTON_ADIPOGENESIS_1	0.522775	1.63488	0.0100287	0.0475832	33	32	IRS2, VEGFA, RPS25, FOXC2, ARL4C, ETS2, PHLDA1, UNC45A, CEBPB, WEE1, RHOB, ID3, MYC, NFIL3, THBD, ERRFI1, MAFF, PER1, CEBPD, ID2, TSC22D1, IER3, SGK1, IL6, CTGF, DNAJB4, FOSL2, NR4A2, BAG3, LITAF, DUSP2,SLC25A25
REACTOME_ACTIVATION_OF_THE_PRE_REPLICATIVE_COMPLEX	0.522748	1.63573	0.0210674	0.0476377	31	29	CDT1, MCM7, RPA1, MCM5, CDK2,CDC45, CDC6,MCM10, MCM2,POLE2, MCM6,PRIM1, CDC7,POLA1, ORC1,PRIM2, POLE, RPA2, MCM3, DBF4, ORC6, ORC3,POLA2, MCM4, ORC2, RPA3, ORC5, MCM8, ORC4
ZHONG_SECRETOME_OF_LUNG_CANCER_AND_ENDOTHELIUM	0.442361	1.63366	0.0065359	0.0476531	66	64	CP, RPL10A, VIM, TPI1, GAPDH,LGALS3BP, LDHA, BGN, EEF2, IGFBP7, CTSZ, FN1, CTSD, TPM3, COL1A1, TUBB, CX3CL1, ALDOA, CLU, COL18A1,SERPINB6, PPIB, CLSTN1, ARHGDIA, ENO1, A2M, ACTC1, YWHAZ, TPT1, TF, ACTB, CFB, ANXA3, PCNA, YWHAG, TKT, C2, YWHAE, TNXB, HMGB1, IGFBP4, CDH1, VCL, GLO1, RAN, TUBA1C, SRSF2, SDC4, EEF1A2, KCTD7, CFL2, VCP, PHACTR4,SERPINC1, SPP1, VCAM1, ALAD, ALDH3A1, CTSA, AHSG, MDH2, P…
OSADA_ASCL1_TARGETS_DN	0.550195	1.63423	0.0151976	0.0476569	24	23	RASSF2, TGFBI, CD44, AXL, DKK3, KLF5, AHNAK, BIRC3,PPP1R14A, BCL2A1, DKK1, DUSP1, CYP1B1, IGFBP6, SOCS3, CRIM1, CDH1, FGFR1, SEMA3C, RSPO3, WNT7B, NRG1, CYP24A1
NAKAMURA_METASTASIS_MODEL_DN	0.50033	1.63324	0.0096286	0.0476714	43	38	PTHLH, NTSR1, DDB2, TGFB1I1, SFXN3, ALDOC, SEMA4B, PMP22, CD44, EHBP1L1, CAST, RUNX2, C3,SERPINB1, RAC2, FABP5, UGCG, IRX3, GLI3, EOMES, TFPI, SLCO4A1, LDLR, PLEK2, AK4, PID1, POLM, PLAT, SNCAIP, CALCA, ACER3, PTPRZ1,TMEM120A, TTC8, WIPI2, OSBP2, RRAGD, AQP3
LIAN_LIPA_TARGETS_3M	0.472475	1.6337	0.0107095	0.0477341	59	51	FABP7, PLA2G7, TREM2, GPNMB, IL1R2, STEAP4, XIST, FCER1G, MMP19, SLC11A1, SLC15A3, MS4A7, FCGR2A, C1QA, CD68, C1QC, C1QB, FCGR2B, MARCO, RGS1, CFP, UTRN, C3AR1, IGSF6, MSR1, LY9, DNMT3A, CXCL2, MPEG1, CD244, TLR7, MMP12, MAFB, FCN1, SEMA7A, S100A9, CD5L, HMOX1, CXCR2, CCR1, FKBP5, ACP5, CLEC4E, CTSB, MYO5A, TNFAIP2, SNX6, NEU1, SLC40A1, GDF15,ATP6V0D2
DAVICIONI_MOLECULAR_ARMS_VS_ERMS_DN	0.393318	1.63275	0	0.0478103	182	166	CCND1, PTP4A3, PRR16, TMEM45A, EFEMP2, DUSP7, KHNYN, SLC43A3, BST2, SORBS3, TRIB2, COL5A2, PLK2, BMP1, CD248,SERPINH1, OBSL1, HEY1, DOK1, SDC1, PMP22, RGS10, CRABP2, RHBDF1, TPBG, ARL4A, SLC1A3, OCA2, FAM129A, MAGEL2, ITM2C, RHOG, DUSP4, C1orf54, OLFML1, ADA, INPP4B, FAM110B, ZFHX4, FNDC3B, SCARA3, NNAT, CRTAP, EGFR,CDC42EP4, EEF1D, PARVA, TSPAN9, EXT1, FKBP11, GALNT2, DLC1, EMP3, ITM2A, LY6E, ZN…
HATADA_METHYLATED_IN_LUNG_CANCER_UP	0.373623	1.63371	0	0.0478153	390	316	DUOX1, CD300A, FGF11, SNX33, OAZ2, TNFRSF10C, HLX, TGFB1I1, PKP1, JPH2, MARVELD1, SFRP2, MEIS3, COPZ2, SARM1, CLEC1A, CXorf36, DYSF, ALDOC, C10orf25, HOXD13, TMEM204, CACNA1C, ARHGAP22, UHRF1, TRAF5, PAM, PDLIM1, CDH13, RAPGEF4, RASGRP2, CD81, LSP1, TFAP2A, SH3D21, TSHR, PTRF, FRZB, TGFBI, COL5A1, C1QTNF1, CNBP, TMSB10, EXOC7, CD93, CYYR1, ZBTB47, NFIX, PROM1, RCSD1, ZNF22, TPPP3, SCARF2, COL1A2,…
WATANABE_COLON_CANCER_MSI_VS_MSS_UP	0.536196	1.63233	0.0190337	0.0478359	29	25	CRIP1, TFAP2A, CASP2, DUSP4, IFI6, MTA2, PDE10A, IQGAP3, ETV5, TRIM7, SOX8, RGS1, AGR2, NCF2, RAB27B, EIF5A, HNRNPL,PLA2G4A, MT1E, ZIC2, USF1, SRSF6, MST1, GAD1, STRN3
LEE_NEURAL_CREST_STEM_CELL_DN	0.418353	1.63234	0.0036276	0.0479245	118	100	FABP7, DDB2, FJX1, SLC1A4, IGFBP3, NOS2, PRR16, GALNT12, TTYH1, LHX2, DMD, NACA, PLK2, EFEMP1, SPRY1, PRSS23, ARL4C,TNFRSF10B, PROM1, TRIM22, NOTCH1, BEGAIN, PSTPIP2, EFNA1, HDC, PLAGL1, GAS6, SORBS2, HLA-B, BCL2, ETV5, HAUS6, HTRA1, EPHA2, CD9, MAFF, WASF1, MTUS1, LZTFL1, HLA-C, PALLD, SPRY2, SAT1, CREB5, DSP, PDLIM5, ZMAT3, QKI, NELL2, DTNA, ENPP4, FOS, NAV3, EMX2, CD46, FUT8, SLIT2, PMAIP1, HS…
REACTOME_MUSCLE_CONTRACTION	0.487185	1.63166	0.0196353	0.0479553	48	40	VIM,SORBS3, DMD, TPM1, TNNI2, TNNT1, MYL4, TPM3, TPM2, ACTG2, ACTA2, ITGA1, TLN1, MYL9, MYH11, ITGB5, MYLK, CALD1, TPM4, CALM3, LMOD1, MYL6,MYL12B, MYH3, CALM2,SORBS1, TMOD1, VCL, DES, MYL3, CALM1, MYL6B,MYBPC2, TCAP, TNNT2, TNNI1, TNNC1, NEB, MYH8, ACTN2
CHEN_ETV5_TARGETS_TESTIS	0.581812	1.63181	0.0227273	0.0479897	23	19	LOC284023, CDCA7, RAD51, CDK2, MCM2, MKI67, CCNE2, MAD2L1, DMC1, HAUS6, RBL1, CCNB1IP1, TGFBR1, DCK, HELLS, CRABP1, TKTL1, NFYB, DDX10
BIOCARTA_CTCF_PATHWAY	0.548086	1.63142	0.0183767	0.0479947	23	23	CDKN2A, TGFB1, TGFB2, TP53, TGFB3, PTEN,RPS6KB1, CD79B, MDM2, MYC, SMAD4, CD79A, CDKN1B, TGFBR2, SMAD1, TGFBR1, PIK3CG, SMAD5, PIK3CA, PPP2CA, PIK3R1, TGFBR3, MTOR
GROSS_HIF1A_TARGETS_DN	0.575576	1.63101	0.0217054	0.0481055	25	20	LGALS3, KCNAB1, PDK1, TPI1, ADM, GAPDH, PGK1, RAMP3, ENO1, RPL27, BNIP3, PGM1, JMJD6, PFKL, SDPR,RPS6KC1, FST,FAM162A, GBE1, LDHB
JIANG_HYPOXIA_NORMAL	0.3731	1.62922	0	0.0485881	311	297	PFKFB4, NOL3, STC2, ZNF395, PTPRU, SLC2A1, P4HA1, EHD2, IGFBP3, SAP30BP, ANGPTL4, RPL10, SGCE, ALDOC, ENO2, RPL12, MXI1, LSR, ITGB4, PLCD1, MDK, MED10, IKBIP, NAP1L1, RPL30, OBSL1, ANXA4, NDRG1, RPS3, GM2A, FEZ1, CAV1, TOMM20, RSL24D1, LGALS1, GPRC5A, CDCP1, PTPN12, EIF4B, P4HB, LGALSL, RALGDS, RPL29, LAMC1, SERBP1, STBD1, MFGE8, ARPC1A, TIMP1, ZBTB47, SLC2A3, PEA15, GPR39, CLDN3, KCNMA1, CCND2, …
LEE_METASTASIS_AND_ALTERNATIVE_SPLICING_UP	0.438659	1.62958	0.001321	0.0486052	74	70	ANKS1A, SLC1A4, TMEM45A, IL3RA, PTPRM, MCM7, BMP1, CSNK1E, HAPLN3, NLGN4X, PTPRF, MAP4K4, LGALS1,LGALS3BP, COL6A2, SHC1, PTK7, BID, PLXNA2, MET, DDR1, MGP, PLAGL1, F2R, TSPAN9, IL12RB1, COL7A1, ELN, ITGB5, BNIP3,TNFRSF1A, BTK, FZD1, BCL2A1, PPP2R1A, MFAP5, LRRC66, LTBR, CAMK1, FAT1, PLXNB3, PIM1, CYR61, LZTR1, ANKS1B, L1CAM, STK32C, ADRA1A, DAP3, SRPK2, SH2D4A, NAIP, RPS6KL1, SMAD3, C6, HIPK2, FA…
BOYAULT_LIVER_CANCER_SUBCLASS_G1_UP	0.418141	1.62939	0.0036541	0.0486056	113	107	CDK19, CTNND2, NRXN3, MARCH3, MMP11, KLHL23, NAP1L1, RPS19, RPL17, RPA1, MAP4K4, SETDB1, MEX3D, LMNA, INPP5A, PRR15L, SOX9, CACNA1D, HNRNPA0, PDGFA, DNAJC9, RBFOX2, PLXNA2, KDM5B, SPINT1, CXADR, DDR1, MGP, AHNAK, RBM8A, CLDN7, TNFSF4, ZNF143, ZNF551, MPZL1, IDUA, ARID3A, PDCD4,SREK1IP1, EPHB4, ZNF83, ATP2B1, ST5, ATP5G2, STT3A, ZSCAN18, TAX1BP3, TMEM63A, NTAN1, BRD3, FNBP1, SOX13, B4GALT3, NCOA3,…
KUNINGER_IGF1_VS_PDGFB_TARGETS_DN	0.475058	1.62824	0.0110497	0.0489281	46	42	PLXDC1, PHEX, ANLN, CAV2, CENPH, LBH, TIMP1, DUSP4, GFOD1, THBS2, MGP, TPX2, F2R, RBPMS, FBXO32, STOM, CKAP2L, CD53, IL33, THBD, ERRFI1, HMGA2, IL1R1, PTGS1, ADO, DLX3, GREM1,C14orf79, RCAN2, F3, CAPG, EPS8, SLC37A3, SPAG5, PRKG2, NCEH1, MMD, ATP1A3, DUSP6, BHMT, ARHGAP6, CRYL1
OSADA_ASCL1_TARGETS_UP	0.486494	1.62778	0.0136799	0.0489591	46	42	JAG2, SYTL2, SCG2, ANGPT2, RASGRP3, BDKRB1, BDKRB2, RNF128, MYB, GRASP, ITGA1, KRT14, CBFA2T3, DLL1, IGFBP5, SEMA6A, SMYD3, KRT13, RASA4, IGFBP1, ATF3, RASSF4, RGS16, LFNG, RHOBTB3, RAB37, CCR6, LTB,PPP1R16B, SSTR2, RET, KLK3, SCG3, KLK1, CLDN14, SSTR1, BMF, GAS2, VDR, CHGB, MTSS1, SEMA3E
CAIRO_PML_TARGETS_BOUND_BY_MYC_UP	0.549776	1.62782	0.0191083	0.0490265	23	23	NPM1, CDCA7, TP53, BAX, EIF2A, CCND2, PTMA, CCNB1, EMP1, NCL, BCAT1,POLR3D, DDX18, CDK4, CUL1, YBX1, CAD, TK1, ID2, THBS1,CDC25A, ODC1, EIF4E
JI_CARCINOGENESIS_BY_KRAS_AND_STK11_DN	0.58957	1.62654	0.0139752	0.0493585	17	17	PDGFRB, TIMP1, VEGFC,ITGBL1, FN1, NEDD9, LOXL3, THBS2, MMP2, LOXL1, C2,CXCL13, FGFR1, LUM, NCAM1, DCN, WNT2
REACTOME_CELL_JUNCTION_ORGANIZATION	0.448054	1.62669	0.0088384	0.0493674	78	63	COL17A1, CDH8, LAMA3, LAMB3, ITGB4, CDH5, CDH13, ITGB1, PLEC, CDH24, CTNNB1,ARHGEF6, CDH3, CLDN3, RSU1, ACTN1, LAMC2, ILK, VASP, CLDN7, PARVA, CD151, CLDN1, CDH4, FBLIM1, LIMS1, CDH11, CLDN5, TESK1, CDH15, PARVB, CTNNA1, CLDN4, CLDN9, PARD6G, CDH6, CDH1, CTNND1, F11R, JUP, FLNC, PVR, PARD3, FERMT2, CLDN14, CLDN15, CLDN11, CLDN12, CRB3, CLDN16, LIMS3, CDH9, CLDN2, PARD6A, CDH12, CADM1, CLDN8, CLDN…
ODONNELL_TFRC_TARGETS_DN	0.405642	1.62519	0.0023641	0.0498272	139	114	CASP14, TMEM107, ANLN, ZNF628, KIF4A, C4orf46, FAP, TUBD1, CHAF1A, MYBL2, MEX3C, PRC1, CDC6, POLE2, CKS1B, KIF20A, FAM26F, PLK4, NDC80, MKI67, GINS3, AURKB, GTSE1, TTK, DEPDC1, CCNB1, CD151, MND1, CENPF, FOXM1, BRCA2, DLGAP5, CEP55, CCNA2, RRM2, TOP2A, ASPM, RANBP1, PLK1, BIRC5, NCAPH, ITGB5, BUB1,ARHGAP11A, CKAP2L, ACVR2B, CENPA, DIAPH3, ANKRD50, BUB1B, CDC20, ERCC6L, CDKN3, FUS, GNAQ, DBF4, TAC…
ZHAN_MULTIPLE_MYELOMA_MS_DN	0.501768	1.62527	0.0098592	0.0498741	46	38	SEPT9, DPP7, TAF1D, MOB3A, RPS2, POLR1D, TMEM133, TMEM123, STK24, SLC16A6, APOL1, OAS3, LETMD1,ARHGAP42, DHPS, PIF1, GPX1, SLC35F2, TKT, TLR10, PAX5, NPAT, RHOBTB3, ZBTB26, ANKRD49, FAM133A, NMRAL1, ICAM4, CHD2, CLTA,TMEM126A, ZDHHC14, CHD7, MRPS31, PRDM5, SLC35D2, SPIN3,ARHGEF12
SU_LIVER	-0.410028	-1.66156	0.003367	0.0501314	55	44	TFR2, SAA4, FMO3, MASP2, RXRA, DHODH, CRP, F12, CYP4F11, ARG1, APOB, CPS1, ARID1A, CFHR2,SERPIND1, HABP2, AFM, CPN2, C8A, C4BPB, APCS, SEC14L2, RDH16, UGT2B4, DDT, GPT,SERPINC1, SLC22A1, GALK1, IGFALS, SLC6A12, CYP3A7, AKR1C4, CYP1A2, GCGR, ITIH2, EXOC6B,SLC25A13, CPN1, CTH, LIPC,SLC25A20, TAT, C9
VALK_AML_CLUSTER_11	0.49497	1.62375	0.013986	0.050218	36	36	VEGFA, CD200, DUSP7, GIMAP5, CD34, SPARC, EVL, GIMAP6, LPAR6, IFITM1, GAS2L1, DPYSL2, KCNN4, FYN,SERPINB9, SLC38A1, MDFIC, EGFL7, LHFPL2, ITGA6, APP, DAPK1, KLF9, H1F0, REEP5, CLIC4, KYNU, DNM1, MYO5C, ST3GAL5, CIITA, DAB2, ALDH2, ASS1, CISH, PALM
BENPORATH_MYC_TARGETS_WITH_EBOX	0.380968	1.62357	0	0.050231	230	212	AMD1, CCND1, GPR4, TGFB1, RPL10, RPL23A, E2F1, RPL22, MCM7, RPL19, APEX1, HNRNPA1, RPS19, CHRNB1, RPL27A, GAPDH, PABPC1, TOMM20, BBC3, ITGB1, ISG20, TGFB3, NOTCH4, BAX, PTEN, LMNA, ELK1, TCIRG1, ARF1, DKK3, RCC1, OCA2, ETS2, CCND2, HMGN2, RHOG, CD79B, HSP90AB1, RPS6, CBS, MUC1, UBA52, INSR, RBM3, CD63, STAT6, EIF4A1, SIGMAR1, TPM2, RPL13A, MET, PTMA, H2AFZ, GALNS, MSN, RPS15, CLNS1A, AP4M1, CCNB1…
FERRANDO_HOX11_NEIGHBORS	0.585697	1.62381	0.0156495	0.0502946	23	20	CD1D, RPA1, MCM5, PTPRF, TYMS,MAD1L1, ADA, CD1A, CCNA2, TOP2A, ERCC1, CD1E, TK1, CD1C, MCM4, HPRT1, STMN1, UNG, MME,MTHFD1
SANSOM_APC_TARGETS_UP	0.408551	1.62317	0.0060533	0.0503368	126	112	DYRK3, SHF, KRT23, DTL, CDCA7, RPL14, MCM7, IMPDH2, APEX1, MSX1, WDFY1, ERGIC1, ANG, CD44, SOX9, SNHG6, MAD1L1, KIAA0922, ETS2, MCM2, CCND2, MARCKSL1, RNASE4, CDC37, RECQL, CCDC86, TCF7, EMP2, CNOT2, MCM6, HOPX, SNAPC2, NAF1, C17orf96, ETV4, CYBRD1, LRIG1, SLC39A14, TC2N, DIAPH3, SOX17, MCM3, KRT18, NPC1, FOXA3, CD320, WDR75, QSER1, AGR3, PSMG2, PASK, MSI1,TNFRSF12A, TIAM1, GNB1L, TGFBR2, SOX4, T…
RIGGI_EWING_SARCOMA_PROGENITOR_UP	0.36655	1.62387	0	0.050348	430	380	KRT17, NR0B1, COL21A1, TGFA, NPTX2, PGF, EPHA3, ANKS1A, DGKD, GPR37, CRIP1, KCNE4, RGS5, LINGO1, IL1RAP, PKP1, TGFB1, JAG2, PCDH17, LAMB3, COL11A1, TMEM173, CARD16, ARHGDIB, LRRC4C, DUSP7, BHLHE41, EDNRA, HVCN1, BST2, GRK5, MMP9, DMD, TRIB2, MCAM, JAK3, ITGA4, PGM2L1, PDLIM1, TOX2, SLFN11, TCF4, LDB2, MSX1, CLIC3, ASAP1, NGFR, NLGN4X, LBH, FRZB, C15orf48, HIVEP3, TNNT1, JAG1, TBXA2R, HMCN1, GRIA2…
GAVIN_FOXP3_TARGETS_CLUSTER_P6	0.423864	1.62173	0.0038511	0.0508079	91	90	LGALS3, KSR1, TPI1, GINS2, RPL17, RASGRP2, RAD51, CENPK, IFI44, TYMS, CLSPN, KIAA0101, MCM10, NCAPG, CKS1B, KIF20A, CCNB2, AURKB, TPX2, CCNB1, CENPF, GZMB, CEP55, CCNA2, RRM2, ASPM, IL12RB1, PBK, CDCA5, CDCA8, PLK1, BIRC5, NUF2, NCAPG2, BUB1, NEK2, EBI3, MYO1F, NUSAP1, KIF2C, CMPK2, RAD54L, CST7, MMS22L, SPC24, FIGNL1, BUB1B, CDC20, GEMIN8, SPC25, CDCA3,LOC728392, TK1, TGFBR2, NRN1, CENPE, TNFRSF…
PEDERSEN_METASTASIS_BY_ERBB2_ISOFORM_7	0.365241	1.62123	0	0.0508315	403	363	ST8SIA4, SYTL1, TGFA, FXYD3, FLJ23867, TMPRSS3, HK2, SAP30, STC2, HPCAL1,EPB41L4A-AS1, IER5, CTNND2, SLC1A4, LOXL2, SFXN3, ANGPTL4, FXYD5, SNHG7, PLXND1, SIX1, CLEC2D, RIT1, ANXA2, RPL5, CAV2, NAP1L1, MST1R, GINS2, PMEPA1, PXDN, CLIC3, CHN1, TP53, ITGB1, RBMX, ISG20, ITGA5, PTRF, JAG1, LHFP, GUCY1A3, CDC45, MYO1E, TMSB15B, LAMC1, RNASEH2A, SPRED1, PLAUR, IDS, TYMS, CD44, NR5A2, SMTN, DSC2, PPP1R1…
PID_E2F_PATHWAY	0.437105	1.62135	0.0050125	0.0508755	74	72	CDKN2A, CCND3, E2F1, XRCC1, CDK2, MYBL2, TYMS, BRCA1, CDKN2C, TRIM28, CDC6, TOPBP1, RB1, E2F2, CCNE2, HIC1, CCNA2, RRM2, RANBP1, RYBP, E2F6, E2F7, SP1, CDKN1A, MYC, POLA1, ORC1,SERPINE1, RRM1, MCL1, MCM3, YY1, APAF1, WASF1, CDKN1B, SIRT1, CREBBP, RBL1, TK1, TP73, HBP1, CASP7, HDAC1, TRRAP, UXT, EP300, RBBP4, KAT2A, CBX5, CDK1, CCNE1, PRMT5, TFE3, CES4A, ATM, SULT2A1, RBBP8, CEBPA, TFDP1, E2F3, E2…
NIELSEN_GIST_AND_SYNOVIAL_SARCOMA_DN	0.563626	1.62178	0.0232919	0.0508888	20	20	GPNMB, NNMT, ANXA1, RNASE1, CTSD, ITGB2,TNFAIP6, TYROBP, CD4, ZEB2, FOLR2, NCF4, MFAP5, CD163, IL10RA, CXCL1, CSF1R, C2, SFRP4, PLAU
LINDGREN_BLADDER_CANCER_CLUSTER_1_DN	0.371176	1.62015	0	0.0510826	378	354	NCKIPSD, IDO1, CDT1, LOXL2, PRG2, LAMA4, HEYL, NEURL1B, E2F1, ENO2, KRT23, SLC43A3, EBF1, CDCA7, NUDT1, GRK5, KIF4A, MCAM, COL5A2, SLFN11, GINS2, RASSF2, COL4A2, ATG9B, MCM5, ASAP1, RAD51, NUP62, LGALS1, PMP22, RGS10, TAGLN2, P4HB, CDC45, MYBL2, TUBA1A, CDCA4, RELL1, RNASEH2A, PCSK6, PRC1, PDGFRB, NRP2, C1orf216, BRCA1, CDKN2C, ARHGAP15, KIFC1, SLC1A3, CDC6, UBE2C, PREX1, PEA15, TNFRSF11A, NEDD9,…
PHONG_TNF_RESPONSE_NOT_VIA_P38	0.369399	1.62049	0	0.051108	337	330	PDLIM4, HLA-G, CD47, ECE1, IRS2, MALL, IER5, MREG, LOXL2, RHBDF2, NETO2, TRIM21, HN1L, BHLHE41, SYDE1, TMEM204, GRK5, PANX1, MMP9, MID1, IFNAR2, MEF2C, ETS1, HEY1, NXN, TUBD1, NUP62, GPRC5A, DENND5A, CDCP1, COL6A2, C1QTNF1, PLAUR, GBP2, STK10, SOX9, PRSS23, NRP2, FOXF1,TNFRSF10B, INF2, PLXNA1, MYO1C, ETS2, TRIB3, FAM129A, NECAP2, OGFR, BID, NAB1, ADARB1, CUL4B, TNIP1, CD58, CX3CL1, INPP4B, ZFHX4,…
REACTOME_ANTIGEN_PRESENTATION_FOLDING_ASSEMBLY_AND_PEPTIDE_LOADING_OF_CLASS_I_MHC	0.558827	1.61989	0.0200308	0.0511149	21	20	HLA-G, PDIA3,SEC24D, TAP1, HLA-F, HLA-A, HLA-B, B2M, CALR, ERAP1,SEC23A, HLA-C, CANX, TAP2,SEC31A,SEC24B, HSPA5,SEC24C, SEC13, SAR1B
BEIER_GLIOMA_STEM_CELL_UP	0.519885	1.62023	0.0220913	0.0511422	39	31	CHRNA1, H19, NRARP, RDH13, SIX1, C18orf54, OBSL1, TLE1, SALL3, GIMAP1, PROM1, SERPING1, CPXM1, ZNF516,LOC441204, FGFR3, NELL2, NRIP3, SLCO4A1, RALGAPA2, EPHA4, SOCS6, NEDD4L, ABCA1, MYO5C, COL9A3, RNF19A, RTTN, PEX13, AKAP7, RDH10
MARKEY_RB1_CHRONIC_LOF_UP	0.414908	1.61948	0.0037313	0.0511486	115	108	CRIP1, CDT1, SLC27A3, STMN2, H19, SFRP2, GJA1, PML, CDCA7, MCM7, ANGPT2, UHRF1, ANP32B, PRDX4, DOK1, SDC1, SEMA3F, XRCC1, SCMH1, CASP2, CDK2, CDCA4, OSMR, RASA3, NFIX, MCM2, DNAJC9, KCNN4, NAB1, KIF20A, CHAF1B, ERCC5, VCAN, BRCA2, TOP2A, CYTH3, PRIM1, CBFB, AREG, SMOC2, NCAPH, KLF4, EZH2, CDKN1A, COL6A3, WDHD1, ANGPTL2, POLA1, DKK2, PIGA, KANK3, FAM3C, MSH2, POLD1, SIVA1, FOXP1, MAP3K4, FADS1, RB…
KEGG_RENAL_CELL_CARCINOMA	0.4432	1.6196	0.0089514	0.0511965	70	68	TGFA, EGLN3, PGF, SLC2A1, VEGFA, TGFB1, ETS1, TGFB2, TGFB3, EPAS1, MAPK3, PAK3, VEGFC, MET, PIK3R5, RAC1, AKT1, PIK3R3, PDGFB, PIK3CD, PIK3CB, VEGFB, CRK, EGLN1, NRAS, CRKL, MAP2K1, AKT3, JUN,RAPGEF1, CREBBP, HRAS, SOS1, CDC42, EGLN2, MAP2K2, EP300, RAP1B, ARNT, GAB1, PIK3CG, RBX1, RAP1A, HGF, PIK3CA, ARNT2, PAK2, PIK3R2, TCEB1, CUL2, FLCN, PAK4, KRAS, MAPK1, TCEB2, ARAF, SOS2, AKT2, PTPN11, PIK3…
TRAYNOR_RETT_SYNDROM_DN	0.597952	1.61911	0.0109546	0.0511995	19	16	CRIP1, RUNX1, CDH13, PTPRF, KLF5, IGFBP5, P4HA2, AMIGO2, COMP, ITGA6, SEL1L3,SLC26A2,CHCHD10, BEX4, GREM2, ENPP1
CHIANG_LIVER_CANCER_SUBCLASS_CTNNB1_DN	0.389746	1.61795	0	0.0516274	170	160	VNN2, ATP2B2, CTHRC1, LGALS3, CP, TMEM45A, SLC17A9, GPNMB, TBX15, LSR, MMP9, CMTM3, CXCL16, EFEMP1,C15orf48, PMP22, MYO1E, COL5A1, RFTN1, MAD1L1, BGN, TIMP1, CHST11, PAG1, CD24, ETS2, COL1A2, COL1A1, TIMP2, LXN, BMP2, GALNT7, CCL20, THBS2, SULF1, ARRDC4, VCAN,SERPINB9, COL3A1, MGLL, SLC7A2, TNFSF4, CD52, AEBP1, PELI1, SEMA6A, MYL9, SPHK1, AMIGO2, TNFAIP8, COL6A3,SLC16A14, LOXL1, SRPX, CCDC80, CNG…
MURAKAMI_UV_RESPONSE_24HR	0.58255	1.61747	0.0247678	0.0517795	20	17	RFC2, TGFB1, NOTCH4, RARG, IFI6, TRAIP, KRT14, EDN2, DSP, DVL1, EGR1,MAP3K14, IL6, ITGB7, VTN, KRT10, SMO
ACEVEDO_FGFR1_TARGETS_IN_PROSTATE_CANCER_MODEL_UP	0.375191	1.61684	0	0.0519651	289	252	EGLN3, HK2, RTP4, RNF39, EPHX4, LGALS3, PIEZO2, MACC1, CP, CAMK1D, EDN1, AFAP1L1, TMEM173, CDKN2B, VILL, TESC, MID1, CITED4, ANXA4, CHRNB1, PARP8, HOMER2, CXCL16, COL8A1, MPZL2, ENC1, PABPC1, NONO, SERPINA3, GPRC5A, LGALS3BP, SMPDL3B, PLAUR, RAB31, SPRY1, IFI44, CD44, MFGE8, SOX9, ARL4A, TIMP1, MLKL, KRT7, DKK3, KCNMA1, DUSP4, TIMP2, SLC41A2, IL10RB, CREB3L4, KCNN4, GALNT7, KLF5, KCNE3, ABCC3, CC…
YAMAZAKI_TCEB3_TARGETS_UP	0.391589	1.61597	0.0022753	0.0522933	175	167	PDE1B, P4HA1, VEGFA, SLC7A1, EFEMP2, SGCE, PTPRM, RAMP2, FKBP9, ANXA2, CDH5, DOCK9, COL4A1, SERPINH1, COL4A2, PXDN, PLOD1, MPZL2, ITGB1, P4HB, EPAS1, HSPG2, SPARC, SLC16A1, CDC42EP1, LAMC1, MFGE8, PTPN9, PDIA3,TNFRSF10B, GNG10, CTSZ, CCND2, DYRK2, CLIC1, GGTA1P, NID1, PLOD2, CALU, TMED2, RCN1, TCF7L2, NID2, FNDC3B, CLU, GNA12, GANAB, SNAI1, EXT1, MESDC1, BACH1, SLC38A1, TMEM189, ZYX, GALNT2, C17o…
BASSO_HAIRY_CELL_LEUKEMIA_UP	0.433287	1.61467	0.003856	0.0526664	80	78	CCND1, IGFBP3, IL3RA, PTPRM, RCBTB2, ANXA1, PTTG1IP, PRSS23, TIMP1, MYOF, RIN2, PLOD2, CD63, IL1R2, VAMP3, ENG, TCF7L2, RPLP1, RRAS, CTBP2, WWTR1, SUSD5, EMP1, SDC3, DLC1, SCN1B, ARRB2, HPGDS, TNFRSF1A, RTN2, B2M, PPIC, RAB13, EPB41L2, PHF2, ACTB, LILRB2, MFAP5, SPRY2, RECK, TBKBP1, HBB, DAPK1, SMPDL3A, IL1R1, SLITRK5, MAF, AIF1, FGFR1, CPVL, S100A13, TIMP4, PLXNC1, IL18, TMEM59, FLT3, SYT1, GAS7…
KEGG_PORPHYRIN_AND_CHLOROPHYLL_METABOLISM	-0.422948	-1.65253	0.0090634	0.0527075	41	36	CP, GUSB, CPOX, ALAS2, FTH1, EPRS, HMOX1,UGT2B15, BLVRB,UGT1A10, UROD, PPOX, UGT1A4, UGT1A7, UGT1A9,UGT2B10, UGT1A3, UGT1A8, UGT1A1, UGT2A1, UGT2B4, EARS2, UGT2B7, COX10, COX15, HMOX2, ALAD, MMAB, UGT2A3, UGT1A6, HMBS, FECH, BLVRA, UROS, HCCS, ALAS1
NAKAJIMA_MAST_CELL	0.475338	1.61443	0.0153846	0.0527179	46	44	LGALS3, MT3, PRG2, GPNMB, ENO2, TRIB2, CPA3, MS4A2, DUSP14, PTRF, RGS10, TIMP1, BRCA1, CTSD,HSP90AB1, CALB2, CLU, HDC, PHLDA2, HPGDS, TSPAN4, LTC4S, ENPP2, VAT1, CYP1B1, CTSG, CLEC3B, GLA, FCER1A, MT1A, FST, VWA5A, CAPG, CCL2, MT1H, PLAT, MAOB, GDF15, GATA2, HPGD, PRDX1, KIT, ALAS1, PEBP1
KRASNOSELSKAYA_ILF3_TARGETS_UP	0.497238	1.61471	0.017192	0.0527447	38	37	FAP, CLEC2B, BDKRB2, TRIM22, IFITM1, TUBB, IFI16, HLA-E, IFI6, ISG15, TAP1, EMP1, MX1, IFI27, XAF1, RGS4, BLZF1, TBX5, PSMB9, NT5E, CD79A, PLSCR1, CTSO, MX2, OMD, IFIT3, PROS1, OAS1, IFI35, HIST1H1C, IFIT1, IL6ST, APOE,HIST1H2AC, TSPAN8, STAT1, PLAU
VANTVEER_BREAST_CANCER_POOR_PROGNOSIS	0.468603	1.61366	0.0120321	0.0528002	55	50	NMU, LPCAT1, DTL, MMP9, ESM1, EBF4, COL4A2, BBC3, FLT1, TGFB3, PRC1, SLC2A3, QSOX2, MELK, NDC80, RFC4, CCNE2, MCM6, EXT1, IGFBP5, MS4A7, NUSAP1, RAB6B, CENPA, DIAPH3, MTDH, AP2B1, GMPS, WISP1, ORC6,PALM2-AKAP2, FGF18, GPR180, SCUBE2, HRASLS, DCK, RUNDC1, CDC42BPA, GSTM3, STK32B, RTN4RL1, GNAZ, TSPYL5, PITRM1, UCHL5, SERF1A, ZNF385B, ALDH4A1, ECI2, OXCT1
SHEPARD_BMYB_MORPHOLINO_DN	0.385191	1.61346	0	0.0528026	200	180	FABP7, TGM1, KRT17, PFKFB4, SOX11, CDCA7L, HLX, NOVA2, LIG1, DLX1, PYGL, ARHGEF10, ANLN, UHRF1, ITGB4, MDK, GINS2, MCM5, HEY1, S1PR1, PMP22, CDK2, PRC1, PDCL, MTHFD1L, CDC6, MCM2, COL1A2, COL1A1, WDR76, MELK, CCNG2, MKI67, SULF1, AURKB, TPX2, GTSE1, TTK, CCNB1, CENPM, NR2F1, C17orf49, FOXM1, TOP1MT, DLGAP5, ASPM, PRIM1, CLDN1, SRSF9, BHLHE22, AEBP1, BIRC5, INPP4A, IQGAP3, C3, NOTCH2, RGS4, PTPN22…
CERVERA_SDHB_TARGETS_1_UP	0.411569	1.61379	0.0059102	0.0528239	118	105	KRT17, RIMKLA, OLFML2A, LOXL2, SCN4B, EDN1, NEURL1B, CACNB3, LHX2, PGM2L1, SCD5, TNNI2, FEZ1, SMPDL3B, TNNT1, TUBA1A, RFTN1, PRSS23, TANC2, MYOF, FSTL1, COL1A1, DUSP4, GPX8, INHBA, MEGF6, EMP2, MAP1B, UBASH3B, LAMC2, ARHGAP23, SHOX2, SUSD5, PIK3CD, EPS8L1, S100A6, REEP1, PLEKHG4, KIF3C, CLIC6, RBP7, SGCB, FHL2, TMEM156, HTRA1, KRT80, DYRK4, PCSK5, IGFBP2, HPSE, MAGEA6, SH3BGRL, LEFTY2, NOD2, GOLM…
REACTOME_SEMAPHORIN_INTERACTIONS	0.44889	1.61384	0.0106525	0.0528983	68	64	TREM2, PLXND1, ITGB1, FES, PLXNA3, CRMP1, PLXNA1, LIMK2, RHOG, DPYSL2,HSP90AB1, PLXNA2, FYN, NRP1, TYROBP, PIP5K1C, MET, RAC1, RRAS, ITGA1, TLN1, RHOA, RHOB, MYH9, SEMA6A, MYL9, MYH11, DPYSL3, ROCK1, RAC2, CD72, MYL6, MYL12B, CFL1, CDC42, SEMA3A, RHOC, LIMK1, MYH14, DPYSL4, PTPRC, ROCK2, RND1, SEMA7A, PLXNB3, SEMA5A, PLXNC1, ERBB2, PAK2, SEMA4A, CDK5R1,ARHGAP35, SEMA4D, SEMA6D,ARHGEF11, DPYSL5, M…
WEIGEL_OXIDATIVE_STRESS_BY_TBH_AND_H2O2	0.503	1.61272	0.0130624	0.053071	36	34	QSOX1,CDKN2B, ITGB4, MMP11, RPA1, TP53,SLC7A5,TUBA1B, RB1,RPL13A, ZYX,CDC25C, ITGB5,PPP1R8, CDH11, ACTB,HSPA13, ITGAL, HLA-C,DYNLL1,CTNNA1, SRF, HDAC1,SPINT2, TPP1, SF1, TCEA1, RNH1, FMO1, BAK1, BMP4, CAPN2, VCAM1, CDK10
SCHAEFFER_PROSTATE_DEVELOPMENT_12HR_UP	0.407498	1.61242	0.0073439	0.0530971	116	107	EGLN3, EPHA3, PDGFD, COL23A1, SLC2A1, FILIP1, TMEM45A, SFRP2, CALCRL, ITGB4, COL5A2, RPL35A, TAF1D, TMEM100, FOXF2, EFEMP1, MAP3K6, TLE1, PGK1, SOX9,ADAMDEC1, LMO4, LRRK1, STK17B, PDGFC, FNDC3B, LRP4, AHNAK, PDLIM3, LAMA5, RALY, PGAM1, ABI3BP, BCL6, BNIP3, ARL6IP5, SESN1, SNRPD3, FZD7, NT5E, ERRFI1, CYP1B1, MAFF, EMD, NLGN1, IGFBP2, SETBP1, LMCD1, PLCB1, CEBPD,TP53INP1, DCLK2, ASPN, KCND2, TFAP2C…
LIM_MAMMARY_STEM_CELL_DN	-0.286292	-1.65257	0	0.0531185	428	405	CDK19, BARX2, IDO1, FAM110A, UNC93B1, OS9, VILL, CORO2A, RPL22, LSR, NUDT1, KRT19, ANXA4, FGF13, HOMER2, SH3BP2, TFAP2A, DAPP1, ISG20, PTPRF, LGALS3BP, IFNGR2, DBNDD2, RNASEH2A, PGAP2, TCIRG1, ARPC1A, RHOV, GABRP, CD24, CLDN3, TMED3, CREB3L4, ZSWIM4, MUC1, SERINC3, OSBPL10, PSMD10, ABHD11, STAT6, SPINT1, ARRDC4, WFDC2, DCLRE1C, TBC1D8, CLDN7, PKN1, MPI, PSMB8, VTCN1, SORBS2, DTX3L, SGK223, NUDT2,…
SILIGAN_TARGETS_OF_EWS_FLI1_FUSION_DN	-0.516458	-1.65267	0.033419	0.0535053	18	17	NOP56, GTF2E2, ASNS, POT1, SLC2A5, RFC1, STYXL1,CNTNAP2, TBL1X, SSR3, IDH3B, PCCA, CLASP2, CDK14, LRBA, DLG2, CDC14B
BURTON_ADIPOGENESIS_10	-0.444609	-1.64521	0.0063694	0.0535056	30	29	DOCK9, CCNG2, FLOT1, MBNL1, FDPS, NSDHL, SDPR, NOL7, LRRFIP1, ANXA6, SQLE, VCL, TMEM37, RAB3IL1, CPEB2, GYG1, SEPT10, UBA3, LPL, PYGB, ZFAND6, MSMO1, MTM1,ATP6V1C1, HMGCS1, FDFT1, STRBP, ACADL, FAM107B
REACTOME_CYTOCHROME_P450_ARRANGED_BY_SUBSTRATE_TYPE	-0.408188	-1.64814	0.013245	0.0535569	51	38	TBXAS1, CYP2J2, CYP1B1,CYP2C18, CYP2C8, CYP2R1, PTGIS,CYP21A2, CYP2A6,CYP4F11, CYP8B1, POMC, CYP2E1, CYP2S1,CYP46A1, CYP4B1,CYP26B1, CYP4F2, CYP3A5,CYP27A1,CYP27B1, CYP2U1,CYP4A11, CYP4F3, CYP2D6,CYP17A1, CYP2B6,CYP24A1, CYP3A4, CYP1A1,CYP4F12,CYP39A1, CYP3A7, CYP1A2, CYP7B1,CYP11A1, CYP2C9,CYP51A1
KAAB_FAILED_HEART_VENTRICLE_DN	0.478249	1.61091	0.0140056	0.0536263	41	40	AMD1,SERPINA3, LDHA, IFITM3, IFITM2, LPCAT4, ISG15, FCER1G, FCN3, CSRP2, ATP2A2,SERPINB1, PPP2R5C, GTF3A, CD68, NME2,SLC39A14, C1QB, IFNGR1, ABCB6, VAT1, CD14, TSC22D1, STAT3, IRAK1, TUBA3D, PQBP1, DAAM1, F13A1, RAB9A, PTDSS1, BOLA2, DEXI, PSME2, SLC31A2, NQO2, WARS, TMEM147, EBP, ATP5G1
KEGG_CELL_CYCLE	0.406348	1.6111	0.0024184	0.0536272	128	121	CDKN2A, CCND1, CCND3, TGFB1, SFN, CDKN2B, E2F1, MCM7, TGFB2, MCM5, TP53, TGFB3, CDK2, CDC45, PKMYT1, MAD1L1, CDKN2C, CDC6, CCNA1, MCM2, CCND2, CCNB2, RB1, PTTG1, CDK6, E2F2, CCNE2, MCM6, TTK, CCNB1, MDM2, CDC27, CCNA2, WEE1, YWHAH, YWHAQ, CDC25C, SMAD2, PLK1, CDC16, CDK7, ZBTB17, BUB1, CDKN1A, CDC7, MYC, MAD2L1, YWHAZ, SMAD4, ORC1, CDK4, CUL1, BUB1B, CDC20, MCM3, CDKN1B, HDAC2, CHEK2, DBF4, ABL1,…
FARMER_BREAST_CANCER_CLUSTER_2	0.512131	1.61069	0.0157368	0.0536513	33	32	KIF4A, PRC1, NCAPG, MELK, KIF20A, CCNB2, NDC80, PTTG1, TPX2, ATAD2, CEP55, CCNA2, ASPM, RRS1, KIF15, BUB1, NEK2, MAD2L1, NUSAP1, CENPA, BUB1B, ESRP1, RAD54B, CENPE, KIF11,SLC25A32, MCM4, RB1CC1, PRKDC, ARMC1, MTFR1, MRPL15
RUAN_RESPONSE_TO_TROGLITAZONE_UP	-0.478776	-1.64585	0.0218069	0.0536702	25	25	LAMA4, SCARB1, ARL4A, FABP5, SORBS1, QKI, CIDEC, CEBPA, LIPE, PLIN4, HIPK3, HIPK2, STAT1, DGAT1, DHRS3, RASD1, TALDO1, PCK1, DBI, ACOX1, AQP7, NFS1, CPT2, ACSL1,HSD17B4
GRAHAM_CML_QUIESCENT_VS_NORMAL_QUIESCENT_DN	0.475323	1.60968	0.0071736	0.0538343	47	43	HLX, TGFB1I1, ALOX5, MPZL2, GUCY1A3, GBP2, IDS, TM4SF1, PROM1, HLF, LIMCH1, EMP1, CD52, RBPMS, AREG, PPFIBP1, SORL1, GLIPR1, HLA-DPB1, CXCL6, APP, CXCL1, FHL1, PMCH, SCHIP1, HLA-DPA1, HLA-DQB1, VNN1, TFPI, AIF1, MLLT3, HLA-DQA1, SPTBN1, SELL, H1F0, HLA-DMA, CRHBP, HLA-DMB, DUSP6,HIST2H2BE, TSPAN6, BAALC, PCDH9
ONO_AML1_TARGETS_DN	0.5017	1.60939	0.0127841	0.0538863	41	33	IL4R, CASP4, CXCR4, CD81, RUNX3, TCF3, IL17RA, CDK6, CCL5, CCR7, RUNX2, CD84,TNFRSF18, CD2,TNFRSF25, SLAMF6, TNFSF8, RBL1, CCR5, CXCR3, SOCS3, IRF4, IGFBP4, IL10, FOXN3, FFAR2, CCR2, SELL, PARP1, GPR83, CREM, SOCS2, ITGAE
ONDER_CDH1_SIGNALING_VIA_CTNNB1	0.423947	1.60969	0.005148	0.0539202	83	77	STC2, IGFBP3,ARHGAP22, TPM1, NDRG1, EPAS1, MICAL2, SOX9, BGN, TSPAN13, IGFBP7, KCNMA1, COL1A2, CCNG2, ACTA2, CXADR, MAP1B, VCAN, EFNA1, MMP19, MYO1B, BIRC3, LTBP2, PRRX1, DOCK10, MLPH, PELI1, MYL9, TAGLN, FBN1, C3, POSTN, COL6A3, SORL1, CDH11, MAGEH1,SERPINE1, MFAP2, PPL, SCG5, CREG1, TNFAIP3, LMCD1, CADM3, CXCL1, CXCL2, LTBP1, IFIH1, SYBU, ICAM1, IL17RC, GREM1, TFRC, CREB3L1, SCNN1A, SEMA3C, POD…
CAIRO_LIVER_DEVELOPMENT_DN	-0.310667	-1.6483	0	0.053956	222	202	TFR2, PRG2, PYGL, LGALS9, FAM46A, NDRG1, GM2A, TAPBP, ISG20, GSN, NCAPH2, ANXA1, H6PD, BRCA1, FN1,TNFRSF11A, NID1, CBS, COL18A1, FKBP11, GSTT2, LRP1, CLDN1, A2M, SQRDL, SAA4, GRIK1, C3, C1QA, CD68, SERPING1, PGM1, ORAI3, KNTC1, FRYL, CFP, SP4, HP, CFH, ALOX5AP, NSDHL, LCP1, PLAC8, LCAT, SERPINF1, PCSK7, LTF, NRN1, DDX27, CYBB, CD3G, SMPDL3A, TMEM30B, IGFBP1, NGLY1, SLC44A4, CDH1, CRP, AQP9, LCN2,…
NIELSEN_LEIOMYOSARCOMA_CNN1_UP	0.578672	1.60979	0.0181543	0.0539602	19	18	LAMA3, KCNMB1, ACTA2, CNN1, MYL9, MYH11, TAGLN, MYLK, SVIL,PPP1R12B, LMOD1, TRDMT1, SORBS1, RAB23, TFPI2,LOC81691, RIMS2, ALDH1B1
FARMER_BREAST_CANCER_CLUSTER_1	0.483902	1.60893	0.0095368	0.0539876	44	39	GMFG, GIMAP4, IFI44, LCP2, IFI44L, IFI6, ISG15, OAS3, FKBP11, OAS2, MX1, XAF1, RSAD2, OASL, CD2, CD8A, CD48, CD3D, IL10RA, CCR5, GZMA, ITK, HERC6, MZB1, IFIT3, GPR171, SH2D1A, OAS1,TNFRSF17, GZMK, POU2AF1, GPR18, CCR2, LCK, IFIT1, CYTIP, CKAP2, CD38, HERC5
ONDER_CDH1_TARGETS_2_UP	0.372858	1.60868	0	0.0540318	256	244	NPTX2, STC2, IGFBP3, PRR16, ENO2, MARCH3, ARHGAP22, COL5A2, RPS6KA2, PRR3, TPM1, PRAF2, PRMT2, CHN1, COL8A1, NNMT, PMP22, JAM3, ITGA7, COL6A2, SPARC, COL5A1, MICAL2, BGN, KANK2, CDKN2C, CHST2, IGFBP7, ZNF22, SV2A, CRIP2, ITGBL1, FN1, KCNMA1, SNED1, COL1A2, COL1A1, PCOLCE, ITGA10, RNASE4, TSC22D3, LOX, TNFAIP6, MARCKS, NID1, GNG11, PLOD2, ZEB1, NRP1, ZFHX4, COL6A1, SYT11, NID2, ACTA2, STARD13, ICK…
WENG_POR_TARGETS_GLOBAL_UP	-0.507975	-1.64594	0.0259067	0.0540816	20	17	CYP2C18, FDPS, GCK, SQLE, ETHE1, GSTM2, GSTA2, TCEA3, SCD, GSTM3, CYP2B6, CYB5B, MSMO1, DHCR7, HMGCS1, IDI1,CYP51A1
KEGG_ALLOGRAFT_REJECTION	0.51109	1.60833	0.0128388	0.0541343	38	30	HLA-G, CD40, HLA-E, FAS, HLA-F, GZMB, PRF1, HLA-A, HLA-B, CD86,HLA-DPB1, CD80, TNF, HLA-C,HLA-DQA2, FASLG,HLA-DPA1, CD28,HLA-DQB1, IFNG, HLA-DOB, HLA-DRA, CD40LG,HLA-DQA1, IL10,HLA-DRB1,HLA-DRB5, HLA-DMA, HLA-DMB, HLA-DOA
SU_THYMUS	0.587233	1.60708	0.031746	0.0543669	20	17	ETS1, NCK2,ADAMDEC1, MYB, GNA13, PIK3CD, RHOH, CD1E, ITK, MMP12, IRF4, SH2D1A, SLAMF1, IRF8, STK17A,TRAF3IP3, CYTIP
REACTOME_LAGGING_STRAND_SYNTHESIS	0.578641	1.6073	0.0267717	0.0543672	19	19	RFC2, LIG1, RPA1, RFC5, RFC4,PRIM1, FEN1,POLA1,PRIM2,POLD1, RPA2, PCNA, RFC3,POLA2,POLD4,POLD3,POLD2, DNA2, RPA3
NEWMAN_ERCC6_TARGETS_DN	0.491847	1.60755	0.0145985	0.0544078	39	35	NGF, COL11A1, HAPLN1, FAM19A5, LBH, PAMR1, ITGBL1, SPATA18, LRCH2, AEBP1, CDKN1A, RGS4, CCDC80, GABBR2,SERPINE1, SYNPO2, MFAP5, GALNT5, RECK, ZMAT3, KCNK2, PTGS1, ADAMTS1, SGCD, SCUBE3, PSG9, PODXL, PAGE2B, SLC1A1, PSG5, NEAT1, LNX1, FGF5, SEPT11, CNTN3
AMUNDSON_GAMMA_RADIATION_RESISTANCE	0.589857	1.60732	0.0256	0.054442	20	16	CD40, EDNRA, XRCC1, BDKRB1, CRMP1, WNK2, TUBA1B, CBLB, C1QB, IGF1R,TNFSF13B, COL11A2, TSPAN7, SLC22A4, CHGA, F11
ROSS_AML_WITH_PML_RARA_FUSION	0.429086	1.60611	0.0076923	0.0544469	77	72	TNFRSF4, PGBD5, SLC1A4, RASL12, GCNT1, ALOX5, CPA3, PXDN, FGF13, TMEM87A, JAG1, P4HB, TLE1, AGRN, CCNA1, CHPF2, MEGF6,NAALADL1, RCN1, AUTS2, FNDC3B, GALNS, GRB10, PRR14, MAP1A, STAB1, CTSW, ALCAM, MMP2, CALR,SERPING1, ARHGAP4, CST7, SMARCD3, AFF2, S100B, STXBP1, NDST2, KRT18, LRFN4, IGFBP2, MAP4, SEC31A, CFD, MXRA7, NISCH, MANF, MRC2, ASNS, HGF, CMAHP, HSPA5, MEG3, TMX4, PRODH, LTK, CDKN1C, CERS4…
NABA_PROTEOGLYCANS	0.512417	1.60611	0.0178838	0.0545357	35	30	PODNL1, ACAN, PRG2,HAPLN1, ESM1,HAPLN3,HAPLN2, HSPG2, BGN, VCAN, PODN, BCAN, PRG4, FMOD, SRGN,HAPLN4, ASPN, OMD, PRELP, EPYC, LUM, OGN,SPOCK2, CHADL, DCN,SPOCK3, IMPG1, CHAD, NYX,SPOCK1
TRACEY_RESISTANCE_TO_IFNA2_DN	0.523454	1.60645	0.0200861	0.0545658	32	29	VEGFA, PTAFR, HSPA6, CORO2A, CAV1, ANXA1, LPAR6, IL10RB, PTTG1, LYN, CBFB, MYC, MAP2K1, SH2D1A, DAD1,LAPTM4B, DIABLO, KDM5A, XBP1, HBEGF, ATF5, SAMSN1, PLAT, DNAJB2, BAG3, MT1X, ARL5A, FBXO8,EPB41L3
REACTOME_SIGNALING_BY_NOTCH1	0.443431	1.60621	0.0063776	0.0545724	70	66	HEY2, DLL4, JAG2, NCSTN, HEYL, HEY1, DTX2, JAG1, MAML3, TLE1, SNW1, ADAM17, HES5, RBPJ, FBXW7, UBA52, RPS27A, NCOR2, APH1A, HDAC7, DLL1, ARRB2, DTX4, TLE2, MAML1, MYC, MIB2, CUL1, ADAM10, APH1B, HDAC9, MAML2, HDAC2,TBL1XR1, CREBBP, HDAC5, MAMLD1, HDAC1, HDAC3, EP300, HDAC4, PSEN1, RBX1, KAT2A, PSENEN, TLE3, MIB1, HDAC11, ARRB1, HDAC10, HES1, SKP1, CNTN1, NUMB, CDK8, TBL1X, DTX1, CCNC, PSEN2, KAT2…
FRIDMAN_IMMORTALIZATION_DN	0.497971	1.60563	0.0254597	0.0545904	34	33	CDKN2A, TGFB1I1, IGFBP3, NDN, TP53, SPARC, IGFBP7, AHR, IFI16, RB1, FILIP1L, IRF7, IGFBP5, CDKN1A, HTRA1,SERPINE1, CYP1B1, HTATIP2, CREG1, IGFBP6, C9orf3, IGFBP4, MAP2K3, CTGF, CLTB,MAP1LC3B, OPTN, ALDH1A3, CXCL14, HSPA2, TSPYL5, IRF5, HPS5
FINETTI_BREAST_CANCER_KINOME_RED	0.582123	1.60495	0.0243902	0.0547737	16	16	MELK, PLK4,AURKB, TTK, PBK, PLK1, VRK1, BUB1, NEK2, CDC7,BUB1B,CHEK1,AURKA,MASTL, CDK1,SRPK1
ZWANG_CLASS_3_TRANSIENTLY_INDUCED_BY_EGF	0.380403	1.60497	0	0.0548518	222	204	SLC2A1, MACC1, IL1RAP, SYT12, RAP2B, EDN1, PER2, CAMSAP1, HRH1, DENND3, PYGM, PANX1, RUNX1, ETS1, PLK2, CSNK1E, ADM, NDRG1, DUSP14, BTBD3, JAG1, TMEM2, CLDND1, PLAUR, PPP1R3B, MYADM, CRIP2, ETS2, PHLDA1, ATXN1, EZR, PURB, CD55, NAB1, GABPB1, DPP4, GALNT7, CCL20, STEAP4, RIPK4, MMP19, EMP1, WEE1, BIRC3, DLC1, MAFK, CLDN1, RND3,ARHGAP42, PELI1, JOSD1, BHLHE40, MBNL2, KLF4, PPFIBP1, RAPGEF2, KLF13, …
NIELSEN_SYNOVIAL_SARCOMA_UP	0.603513	1.60445	0.0172414	0.0549302	18	16	NPTX2, ECEL1, CPA3, TGFB2, ENC1, RTN4R, VEZF1, APBA2, TLE3, ZIC2, OLFM1, KIF1A, RGS6,COL9A2, PRAME, MFSD3
ZHENG_GLIOBLASTOMA_PLASTICITY_UP	0.373871	1.60378	0	0.0551434	250	229	CDKN2A, CCND1, CDT1, LIG1, CP, VWA1, PLA2G7, TESC, ANLN, TRIB2, UHRF1, KIF4A, PFKP, MMP15, SPRY4, MCM5, RAD51, JAG1, CDC45, TLE1, PRC1, SPRY1, MFGE8, CLSPN, EDNRB, HFE, KIAA0101, RCC1, CD24, MCM2, RNF128, CCND2, DUSP4, MELK, ZFP28, CKS1B, CCNB2, SPARCL1, PLK4, NDC80, LYN, RFC4, CLU, EXO1, AURKB, SERPINB6, MCM6, TPX2, HOPX, CNIH2, CCNB1, PIK3R3, KIF18A, RASSF3, TUBB3, MYO1B, RRM2, FAM127A, TOP2A, …
MARSON_FOXP3_TARGETS_UP	0.44748	1.60282	0.0052701	0.0554682	66	63	TNFRSF4, CRIP1, VIM, CELF2, ETS1, GM2A, CD81, LRRC8C, DDIT4, CD44, STK10, RCSD1, SLC2A3, SWAP70, MYO1C, CD24, ITM2C, DUSP4, SERINC3, MAPRE2, TNK2, PSMB8, NKG7, MYH9, S100A6, ECM1, MBNL2, S100A4, S100A10, RAC2, SAMHD1, NCF4, CD2, MCL1, CORO1A, SH3BGRL, TIAM1, ARHGAP9, TGFBR1, ZNF260, IRF8, RGS16, CSNK1D, PDLIM2, NRIP1, PLIN2, RAMP1, XCL1, CAPG, BASP1,PDZK1IP1, MKNK2, SNX18, ITGAV, EPHX1, CYB5A, OS…
TONG_INTERACT_WITH_PTTG1	0.458353	1.60254	0.0134771	0.0555178	57	53	ABT1, NOB1, RPL30, FGF13, RSL24D1, RPL31, RPL41, PLK3, RPF2, FAM64A, HMGN2, DDX47, RPS10, RPS15, APOBEC3F, TEAD4, ADAP2, NHP2, ARPC1B, AEBP2, RPS26, DDX54, TBPL1, WDR5, CCDC149, ARL6IP4, CDC42SE1, ZNF740, IER3, C7orf50, AURKA, EIF2S2, PHF11, C19orf53, ERI1, CTNND1, LLPH, TMEM237, RNPC3, ATAT1, RPL26L1, AIFM3, KIAA1191, PTRH1, GSTM3, ATP5O, PUS7L, ZMAT4, CNP, MTG1, TRIM41, PPFIBP2,GABARAPL1
OHM_METHYLATED_IN_ADULT_CANCERS	0.525321	1.60157	0.030837	0.0558631	27	26	CDKN2A, CCND1, SFRP2,CDKN2B, BRCA1,PYCARD, HIC1,RASSF1, FANCF, TIMP3, TP73, GATA4, SFRP4, DAPK1, GATA5, CDH1, GSTP1, RBP1, RARB, MGMT, THBS1, SOCS1, ESR1, MLH1, FHIT, SFRP1
DORN_ADENOVIRUS_INFECTION_12HR_UP	0.532019	1.60169	0.0266272	0.0559049	29	27	RASL12, PLK2, KRT19, MMP15, CYTH1, TSC22D3, KRT14, RND3, ATF4,HIST1H2BK, NFKB2, EPHA2, MFAP2, SNAI2, ELL2, JUNB, EGR3, PDE2A, IFIT2, DDX58, CYR61, IFIT1, NR4A1, SRSF1, FUBP1, BCAR3, RAB1A
REACTOME_INTERFERON_GAMMA_SIGNALING	0.452838	1.60123	0.0107672	0.0559153	63	58	HLA-G, PTAFR, PML, IFNGR2, GBP2, CD44, SP100, IRF9, PTPN2, OAS3, HLA-F, IRF7, FCGR1A, OAS2, HLA-A, PTPN6, IRF3, HLA-B, JAK1, FCGR1B, B2M, OASL, IFNGR1, IRF2, GBP4,HLA-DPB1, HLA-C,HLA-DQA2, PIAS1, GBP5, PTPN1, SOCS3,HLA-DPA1, IRF4, OAS1, IFNG, ICAM1, IRF8, GBP1,HLA-DQA1, MT2A, CAMK2D, CAMK2A,HLA-DRB1, IRF1, GBP7,HLA-DRB5, SOCS1, IRF6, NCAM1, SUMO1, PRKCD, STAT1, VCAM1, CIITA, JAK2, CAMK2B, IRF5
TSAI_RESPONSE_TO_IONIZING_RADIATION	0.395369	1.60059	0.0011641	0.0561884	149	145	CCL18, DDB2, POU5F1, LGALS3, CCNI, ZNF85, KRT19, COL4A2, ENC1, BBC3, PLOD3, RELA, ADORA3, AXL,FAM134C, PPM1D, UBE2C, SIPA1, CASP1, VEGFC, AHR, FN1, IFITM1,TSC22D3, KIF20B, CCNG2, RB1, CCL20, COL6A1, PTTG1, CDK6, IRF9, CCNE2, FCN3, IL2RB, GRN, FAS, SNAPC2, ARL2BP, KRT14, BIRC3, MDFI, ENO1, CCNK, RANBP1, PLK1, PRMT1, PTPN6, ZNF274, DKC1, CCT4, STK4, KLF4,TNFAIP8, DPYSL3, BATF, CDKN1A, MYC, PTPN22, …
MAHAJAN_RESPONSE_TO_IL1A_UP	0.434382	1.60021	0.0126582	0.0562964	81	72	MAP2, PTP4A3, EFS, CXCL5, FLT1, ISG20, SDC1, ERG,SLC16A1, CHST7, NEDD9, KDR, MYB, RB1, CCL20, IL15RA, TRIM25,ADORA2A, ITGA1, CCL5, RHOB, MAFK, COL7A1, BEST1, CXCL3, MYC, OASL, STAT4, LTC4S, DUSP1, LMOD1, RIPK1, FSTL3, IL7R, PIM2, CXCL2, NFRKB, MMP12, RAB11B, GFRA2, TFPI2,TMPRSS6, IFIT2, IL6, AKAP8L, SSTR2, LRMP, SECTM1, SPTBN1, HBEGF, CCL8, IL6ST,B4GALT1, THBS1,MAP3K13,TNFAIP2, ALB, IL1B, AR, APO…
BORLAK_LIVER_CANCER_EGF_UP	0.458665	1.59975	0.0097222	0.0563548	57	53	TGFA, CCND1, H19, ANXA2, COL4A1, ETS2, PDGFA, NID1, RBM3, CD63, MKI67, DDR1,SERPINB6, CLDN7, CCNB1, TWF2, RAB3D, RRM2, AEBP1, ALCAM, S100A11, CPE,SERPINE1, KRT8, KRT18, ELF3, PLSCR1, JUNB, RHOC, IGFBP1, ATF3, FOS, EGR1, TGIF1, RBP1, ID1, LTB, CDK1, TLR6, TFF3, ECT2, BTG3, SCD, VIL1, SLC7A7, BLNK, LPL, SPP1, BEX1, EPS15, BTG2, CA2, FGL2
SHIN_B_CELL_LYMPHOMA_CLUSTER_2	0.520557	1.59992	0.0194611	0.0563636	30	28	MBD1, NCSTN, PRDM1, MXI1, DTX2, CCND2, BMI1, HOXC13, AKT1, MYC,TNFSF13B, FANCA, FZD6, FOSB, RFNG, IRF4, PIK3CG, POU2AF1, TRAF3, XBP1, MIB1, BTG3, IRF6, PRKCD, SOCS2, PSEN2, GADD45B, STAT5A
MAINA_VHL_TARGETS_DN	0.593479	1.59844	0.0259939	0.0569259	18	17	CCND1, VEGFA,SLC16A3, ENO2, MXI1, SPARC,BHLHE40, BNIP3, CLDN4, MAF, CTGF, F3, GBE1,TNFSF10, GNG4,GAL3ST1, DECR1
HERNANDEZ_MITOTIC_ARREST_BY_DOCETAXEL_1_DN	0.493057	1.59782	0.0137741	0.0571128	38	36	CTHRC1,RASGRF1, DTL, CLEC2B, CDK2, CDC6, UBE2C, TUBB, DPYSL2, CKS1B, PLOD2, PDGFC, SEMA4C, XIST, LTBP3, CDH11, FHL2, RBL1,SLC29A1, KLRK1, SNAI2, CASP7, IGFBP1, MAF, SDC2, CDK1, POLD3, CAPG, FIS1, PMEL, FBXO5, GBE1, PDGFRA, RGS2, GLRX, MAN1A1
KEGG_CYSTEINE_AND_METHIONINE_METABOLISM	-0.435587	-1.63492	0.0088757	0.0572996	34	31	AMD1, LDHA, SDS, CBS, IL4I1, SRM, MTAP,TRDMT1,DNMT3A, DNMT1, MAT2A,DNMT3B, MAT1A, SMS, LDHC,ENOPH1, MTR, BHMT, MPST, CDO1, AHCY, MAT2B, CTH, APIP,AHCYL1, LDHB,AHCYL2, TAT, ADI1, GOT1, GOT2
NADLER_OBESITY_UP	0.447851	1.59641	0.0078431	0.0576228	61	59	LGALS3, FXYD5, PABPC1, MFGE8, BGN, PEA15, CTSZ, CTSD, COL1A1, PLD3, FLNA, CTSK, HCLS1, FCER1G, LAPTM5, GRN, TLN1, MIF, LRP1, PFN1, IFI27, POSTN, FCGR2A, CD68, C1QB, TPM4, SELPLG, CD53, CTSS, DUSP1, FBLN2, PITPNA, CFL1, PLTP, ALOX5AP, MRC1, CSF1R,SERPINF1, MPEG1, CSTB, UCP2, DAD1, MT2A, PLIN2, DYNLT1, CAPG, CTSB, SEC13, BASP1, NEDD8, LBP, LGMN, CKB, PSAP, CRYAB, IFI30, CTSA,ATP6V1C1, TPD52
YAO_TEMPORAL_RESPONSE_TO_PROGESTERONE_CLUSTER_16	0.434979	1.59662	0.0089629	0.0576248	79	74	NPTX2,PRKCDBP,TMEM45A, NPDC1, PYGM, COL4A1, COL4A2, PRAF2, TNNI2, FEZ1, GAPDH, TP53, COL6A2, SPARC, BGN, COL1A2, COL1A1, PCOLCE, ACTN1, GUSB, PDLIM7, COL6A1, GPX7,COL18A1, VCAN, CRTAP, COL3A1, CNN1, SMOC2, FBN1, ADAM15, COL6A3, ACTC1, SRPX, CALM3, AGR2, MFAP2, CD2BP2, BZW2, FADS1, FABP5, AKT1S1, AOC3, DMPK, BCL7C, NDP, TFPI, ANXA6, SQLE, AQP4, DBN1, NME4, PCDH7,FAM132A, CRABP1, FEZ2, SARDH, STRA6…
PYEON_HPV_POSITIVE_TUMORS_UP	0.421708	1.595	0.0024752	0.0582755	98	84	CDKN2A, LIG1, NEURL1B, DTL,C18orf54, CDCA7, UHRF1, BTNL9, CENPJ, CENPK, TYMS, ABCA17P, CDKN2C, SLFN13, MAP7D2, PRDM15, WDR76, MYB, NOTCH1, LY75, RTKN2, ATAD2, PIK3R3, CENPF, FANCL, NASP, USP1, E2F7, KIF15, EZH2, CDC7, BARD1, KNTC1, PSIP1, FAM208A, MCM3, RMI2, CDK3,ANKRD36B, GLS2, GEN1, MEIS1, ZNF789,SLC35E2B, ZNF367, RBBP4, RBM15, KLHL35, C5orf34, MEI1, DONSON,CASP8AP2, HELLS, CSTF3, ZMAT1, USP34…
WONG_ENDMETRIUM_CANCER_DN	0.424702	1.59392	0.0129199	0.0583383	82	75	ALDH1A2, EHD2, EFS, NDN, CD248, LDB2, EFEMP1, CNRIP1, ADAMTS5, P2RY14, TRPC1, PAK3, EDNRB, TRO, SLC24A3, SLC18A2, NID1, ZEB1, GNLY, HIC1, GAS6, COL3A1, XYLT1, CTSW, FBN1, RBP7, SRPX, GLT8D2, TSHZ3, SYNPO2,CRISPLD2, MASP1, LMOD1, EMILIN1, ATP8A2, COX7A1, RUNX1T1, ECM2, IGFBP6, SFRP4, TCEAL7, OSR2, LTBP4, PARM1, COL14A1, SIN3B, KIF26A, HGF, MEG3, SCARA5,TMEM132C, ADAM33, RAMP1, FLRT2, OGN, F10, PID…
LABBE_TARGETS_OF_TGFB1_AND_WNT3A_UP	0.409512	1.59366	0.0049444	0.0583905	111	98	MAP2, SOX11, ELOVL2, EFNA3, LAMB3, FXYD5, SEPT9, PYGM, BMP1, CD81, ITGB1, GSN, JAG1, ELK3, MMP14, AHR, INHBA, NRP1, KCNE3, ROBO1, CACNA1H, IL15RA, BACE1, GPC1, PDGFB, ZYX, RUNX2,SMARCAL1, MOGS, BHLHE40, ACOT9, ATP13A3, CPE,SERPINE1, DOK2, DUSP1, ACTB, RPA2, KRT8, FBLN2, CORO1A, WISP1, CD70, RASAL1, JUNB, FURIN, ADSSL1, SGK1, ANXA6, ANAPC1, AQP4, RCN2, POU2AF1, ITGB6, DBN1, HTR2B, FAM50B, ANKRD1, …
ZHOU_TNF_SIGNALING_30MIN	0.45403	1.59397	0.0122616	0.0584178	54	51	TUBB4B, RPL10, PLP2, MCM7, TAGLN2, CTNNB1, COPS2,SLC39A1, EEF2, CLIC1,SIGMAR1, KRT14, IGFBP5, ERGIC3, ATF4, IFI27, ATP5G2, DUSP1, MAP2K1, NFKBIA, PTMS, KALRN,PPP2R1A, CD5,TNFAIP3, SF3B2, CXCL1, TMF1, CDC123, KLF10, JUNB, EGR1, IL6, DDX56, PRDX5, CYR61, HNRNPU, IER2, PTGS2, PSMB7, MRPL36,NDUFA13, HMGA1, HSPB1, HDLBP, PRDX2, TUBA4A, PHB, PIR, TRAP1, TMBIM6
AMUNDSON_GENOTOXIC_SIGNATURE	0.412508	1.59411	0.0072029	0.0584541	105	98	ST8SIA4, HK2, DDB2, AMD1, PHLDA3, DISC1, ITGA4, MEF2C, PRR3, PAQR4, BMP1, RARG, CDC45, LCP2, PKMYT1, AXL, MFGE8, CDKN2C, AKAP13, PHLDA1, PDLIM7, NEK6, ARHGEF2, SP100, MGP, NR2F1, ZNF211, NFE2L3, BUB1, BAZ1A, MYC, PPP1R8, ARPC4,TOR1AIP1, PPP3CC, CENPA, IRF2, BUB1B, RPA2, SIVA1, ZNF217, CD48, GEM, FSTL3, TNF, ELF3, SPRY2, ZWINT, GRIN2A, PCNA, TK1, TAF5, CHST1, GLS2, CCL4L1, ZDHHC5, TOR1A, FGF18,TNF…
SMID_BREAST_CANCER_NORMAL_LIKE_UP	0.35782	1.59411	0	0.0585479	476	438	VNN2, COL17A1, LZTS1, PDGFD, MALL, FXYD1, RGS5, VASH1, CD40, CCDC102B, LAMA4, GJA4, VILL, ELMO1,CSGALNACT1, TESC, CD1D, ACVRL1, DMD, NRIP2, ANGPT2, GIMAP5, CELF2, GMFG, PECAM1, ITGA4, MATK, MEF2C, RASGRP3, TCF4, RASGRP2, DLK2, CLEC2B, CAV1, C10orf10, ISG20, EFEMP1, FRZB, LINC00341, GIMAP4, FLI1, ARID5A, ARHGAP25, LHFP, LGALSL, FAM49A, ITGA7, GIMAP6, LCP2, STK10, SLIT3, CD180, FNDC4, ARL4C, P2RY14…
REACTOME_THROMBIN_SIGNALLING_THROUGH_PROTEINASE_ACTIVATED_RECEPTORS_PARS	0.506861	1.5942	0.0215517	0.058581	32	29	F2RL3, GNB1,MAPK3,GNG10,GNG11, GNB4,GNA12, GNG2,GNA13,GNGT1, F2R,ARRB2, GNB2,GNA15,F2RL2, GNAQ, GNB3,GNGT2,ARRB1, GNG5,GNG12, SRC, F2,MAPK1,GNA14,GNA11, GNG7, GNG4, GNB5
MIKKELSEN_NPC_HCP_WITH_H3K27ME3	0.371944	1.59284	0	0.0587084	341	221	TMEM91, CRHR1, GRIK3, ATP2B2, SCN5A, PLXDC1, MESP1, S1PR5, CDH8, ALDH1A2, GPR37, PGBD5, STAC2, HR, SCN4B, SYT12, STMN2, JAG2, TMEM130, ECEL1, LSR, FIBCD1, SLC12A5, VWA2, B3GNT7, C9orf172, KCNS3, HOXD11, CPNE5, STBD1, SLC6A20, IGF2, SOX18, TRPC6,TNFRSF11A, BCL11A, PRPH, FOXL1, SLC6A3, CALCR, COL15A1, COL13A1, SPINT1, CBLN4, HOXC13, LRFN5, RIPK4, IGSF21, SORCS3, CLDN7, CELSR1, PDGFB, LY6H, LTBP2, E…
JAZAG_TGFB1_SIGNALING_VIA_SMAD4_DN	0.448828	1.59212	0.0025608	0.0589754	66	60	JAG2, SH3BP2, RBMX2, KCNMB1, LCP2, SHISA5, PDGFRB, PAK3, CDK17, CLEC11A, MFNG, CDK18, PHLDA1, PTK7, TUBA1B, BMP2, RPL13A, NID2, MAPK7, CD1A, BYSL, TNFRSF10A, SYNGR2, SPI1, RASSF1, EVI2A, ITGA6, LIF, POU2F2, CLDN4, AIM2, FLT3LG, LTA, GALR1, SF1, ABCD1, PNOC, CCNE1, PRODH, PTCH1, ITGB7, SLC22A6, HRH2, AGPAT1, SCAMP3, PKLR, NRG1, VIL1, SNX10, CNKSR1, MST1, RBP4, CYB5A,ST6GALNAC2, NEMF, UNC119, S100A…
GUILLAUMOND_KLF10_TARGETS_DN	-0.448684	-1.63004	0.017192	0.059228	30	28	CYB5R3, CTNNB1, OSTC, CTSS, ELOVL5, OIT3, CD36, CLEC4F, VMP1, VNN1,SEC61A1, FCN1, SRSF3, AQP9, ENPEP, DERL2, RPL7L1, TXNIP, RCAN1, SLC2A2, GPD1, AACS, OGT, PSME4, AK3, RTN4, PAPSS2, CHPT1
KOBAYASHI_EGFR_SIGNALING_6HR_DN	0.568038	1.59117	0.0258752	0.0594084	18	18	TGFA, CCND1, VEGFA, DUSP4,CX3CL1,PHLDA2, FOSL1, EPHA2, MAFF, JUN, HMGA2, IER3, DUSP5, CYR61, F3, IL11, DUSP6, G0S2
PID_CMYB_PATHWAY	0.424485	1.59061	0.0098401	0.0595788	84	75	CDKN2A, CCND1, SKI, ETS1, UBE2I, CD34, MAD1L1, PIAS3, TRIM28,ADORA2B, CCNA1, ETS2, COL1A2, MYB, ADA, CDK6, H2AFZ, CEBPB, CCNB1, BIRC3, IQGAP1, LEF1, SPI1, CD4, PPP3CA, SND1, ZFHX3, SP1, CDKN1A, MYC, BCL2, NRAS, LYZ, ATP2B1, ZFPM1, SIN3A, CDKN1B, CREBBP, TAB1, HRAS, COPA, CSF1R, CEBPD, MAF, EP300, MCM4, PAX5, GSTM1, MAT2A, MAP3K7, ANPEP, CA1, PIM1, CBX4, PTGS2, CEBPA, HES1, KITLG, CASP6, YEATS4, C…
HAN_JNK_SINGALING_UP	0.497398	1.59015	0.0292887	0.059699	35	34	CTNND2, CD276, RUNX1, TGFBI, EFNB2, CCND2, LOX, ISG15, IRF9, TNK2, SHOX2, CCL5, UBE2L6,ANGPTL2,IFI27L2, GBP4, FAM3C, DUSP1, JUN, FOXP1, SOX4, ID2, IFIT3, TNC, SGK1, CXCL10, CYR61, IFIT1, DUSP16, IL1RL1, DPT, USP18, IMPACT, MAN2A1
PUJANA_BREAST_CANCER_LIT_INT_NETWORK	0.411165	1.58993	0.0024631	0.059716	101	99	ZNF350, CCND1, RFC2, NPM1, E2F1, RPA1, TP53, RAD51, RELA, CDK2, PLK3, CLSPN, ELK1, LMO4, FANCG, BLM, FLNA, RB1, RFC4, AKT1, CCNB1, MDM2, BACH1, BRCA2, CCNA2, CDC25C, PLK1, MSH6, SHFM1, SP1, JAK1, MYC, BARD1, NMI, FHL2, BRAP, CDK4, H2AFX, MSH2, BUB1B, NFKBIA, RPA2, MCM3, NUFIP1, HDAC2, FANCA, CHEK2, ABL1, CREBBP, HMG20B, CTBP1, MRE11A, FANCD2, CHEK1, HDAC1, XRCC6, JUNB, TERF2, MED1, NBN, EP300, AU…
PID_NECTIN_PATHWAY	0.527282	1.5895	0.0238806	0.0597243	30	26	PTPRM, CTNNB1, PDGFRB,PIP5K1C, RAC1, TLN1, PDGFB, IQGAP1, CLDN1, PTK2, CRK,RAPGEF1, CTNNA1, CDC42, RAP1B, CDH1, VAV2, RAP1A, F11R, ITGB3, PIK3CA, SRC, PVR, ITGAV, PIK3R1, FARP2
HADDAD_T_LYMPHOCYTE_AND_NK_PROGENITOR_DN	0.455465	1.5893	0.0186418	0.0597344	63	53	NPTX2, CRIP1,ARHGEF10, TRIB2, LGALS1, RAB31, CD24, TYROBP, VCAN, LY86, RRM2, LEF1, CCR7, KIF15, HCK, CST7, GPR183, LYZ, RNASE6, MS4A6A, CDC20, PLEK, CTSG, IL7R, TNF, CSTA, CD7, PALLD, ZWINT, CFD, CSF1R,SERPINF1, CEBPD, IL6R, MCM4, IRF8, S100A8, LTB, HGF, NRXN2, F13A1, SLC2A5, ITGB7, HAL, TARP, TRAF4, LGMN, BLNK, MPO, MME, SPON1, G0S2, SCN3A
BIOCARTA_ECM_PATHWAY	0.543057	1.58958	0.0347826	0.0597946	24	23	ITGB1, GSN, SHC1, MAPK3, FYN, DIAPH1, ITGA1, TLN1, RHOA, PFN1, PTK2, MYLK, ROCK1, MAP2K1, HRAS, PXN, PIK3CG, PIK3CA, SRC,ARHGAP5, MAPK1, PIK3R1, RAF1
PID_RAC1_REG_PATHWAY	0.482059	1.58877	0.0190616	0.05993	38	38	ARHGEF25, DOCK6, RASGRF1, ELMO1, PREX2, CHN1, ARHGAP1, ARHGEF7,ARHGAP17, PREX1, ARHGEF6, ARHGEF2, RAC1, ARHGDIA, ABR, DEF6, VAV1, KALRN, DOCK2, SOS1, TIAM1, ARHGAP9, TRIO, RACGAP1, VAV2, RASGRF2, DOCK1, EPS8, NGEF, ABI1, MCF2, SPATA13, RALBP1, VAV3, BCR, TIAM2,RAP1GDS1, CHN2
CHIARADONNA_NEOPLASTIC_TRANSFORMATION_KRAS_DN	0.389506	1.58746	0.0011547	0.0605294	142	139	BMP8A, LAMB2, ATP11A, COL11A1, TMEM45A, COPZ2, DGCR2, FKBP10, GRK5, PFKP, COL5A2, LGALS9, ADM, COL4A2, WWP2, GSN, PMP22, C3orf58, SLC4A3, LASP1, COL5A1, TCF7L1, INPP5A, RBMS2, STK10, PRSS23, TMEM159, FSTL1, COL1A2, COL1A1, PCOLCE, EBF3, RNASE4, SEC14L1, EMP2, NOTCH1, DDR1, ISG15, GRB10, GUK1, CRTAP, CD151, NTPCR, ARL2BP, RNPEPL1, CHFR, VAMP5, ID3, CRLF1, TSPAN4, ELN, FBN1, NDRG4, ITGB5, SESN1, CC…
BECKER_TAMOXIFEN_RESISTANCE_UP	0.46522	1.58728	0.0121622	0.0605314	50	46	E2F1, CACNB3, BST2,LGALS3BP, IFI44, ARL4A, PROCR, CTSD, RNASE4, TUSC3, CXADR, IFI6, ISG15, IRF9, NNAT, ID3, MX1, TAGLN, IFI27, B2M, CPE, NMI, IRF2, EBAG9, PPP2R2A, GTF2E2, BCAS1, EGR3, TFPI2, ID1, PTK6, SNX1, UGT2B15, IFIT1, TFF3, NRIP1, BTG3, PITX1, CRABP1, NMT1, EIF2AK2, TSPAN8, EPHX1, TSPAN3, DECR1, SEPHS2
KIM_WT1_TARGETS_12HR_UP	0.38313	1.58666	0.0023256	0.0606622	162	155	TMPRSS3, ZNF395, CSPG4, TBC1D2, P4HA1, IL1RAP, CHRNA1, GLI2, HSPA6, SEPT9, BHLHE41, ENO2, FHOD1, TRIB2, PLCD1, SERPINH1, ADM, MSX1, LBH, PRKCH, CDR2L, UBE2J1, CASK, DDIT4, SOX9, TM4SF1, MYOF, MED13L, PEA15, ATP2B4, PLEKHO1, IL10RB, RBFOX2, CX3CL1, VPS37B, DDR1, GRB10, LRP4, CDC42EP4, PIK3R3, ULBP2, ARHGDIA, DLGAP5, ENDOD1, MICALL1, P4HA2, PPP3CA, AREG, MYL9, NYNRIN, RASSF7, KIF3C, ITGB5, MYLK, MY…
PID_SMAD2_3NUCLEAR_PATHWAY	0.428164	1.58676	0.0114213	0.0607045	82	73	SAP30, DLX1, SKI, CDKN2B, RUNX1, MEF2C, CDK2, LAMC1, SNIP1, PIAS3, COL1A2, RUNX3, NR3C1, TCF3, AKT1, MED15, CEBPB, IRF7, SP3, CBFB, SMAD2, RUNX2, FOXO3, ZBTB17, ITGB5, SP1, CDKN1A, MYC, CREB1, SMAD4,SERPINE1, CDK4, SIN3A, SKIL, JUN, HDAC2, CREBBP, RBL1, CTBP1, DCP1A, SMAD7, HDAC1, TGIF2, MAX, ATF3, EP300, FOS, RBBP4, TGIF1, PIAS4, IL10, RBBP7, SIN3B, KAT2A, TFE3, TFDP1, E2F4, AR, HNF4A, SMAD3, ES…
LI_WILMS_TUMOR_ANAPLASTIC_UP	0.556993	1.58493	0.0233281	0.0613874	19	19	PCGF3, CCNA1, MKI67, RFC4, TTK, CENPF, NCAPH,NUSAP1, KIF2C, CENPA,RAD54L, KPNB1, CDCA3, RFC3, HAT1, HTT, CDK1, KPNA2, G3BP2
REACTOME_G1_S_SPECIFIC_TRANSCRIPTION	0.571246	1.58494	0.0341085	0.061478	19	17	CDT1, E2F1, CDC45, TYMS, CDC6, CCNA1, RRM2, POLA1, ORC1, PCNA, CDK1, CCNE1, TFDP1, FBXO5,CDC25A, TK2, DHFR
DUTERTRE_ESTRADIOL_RESPONSE_6HR_UP	0.373853	1.58388	0	0.0617888	229	219	HEY2, NT5DC3, AMZ1, ELOVL2, AMD1, STC2, SLC1A4, HR, FLNB, SEPT5, SLC7A1, ATP11A, NR2C2AP, LDLRAD3, SEPT9, E2F1, DTL, CDCA7, MCM7, UHRF1, IFNAR2, RPL32, GINS2, TPM1, MCM5, EXOSC5, CHRNA5, C1QTNF6, ISG20, CHAF1A, CDC45, SLC16A1, RAB31, TPBG, CD44, MICAL2, SCARB1, PRSS23, SLC7A5, MTHFD1L, MYOF, BRCA1, CDC6, MCM10, OPN3, MCM2, PHLDA1, MYBBP1A, WDR76, POLE2, LYAR, MYB, PLOD2, CALCR,RAPGEFL1, GINS3, CC…
HOELZEL_NF1_TARGETS_DN	0.405838	1.58282	0.0024631	0.0622981	115	100	LHX9, ZNF395, DLX6, CP, CD200, TMEM44, TMEM204, ADM, DCHS1, MMP16, ZNF423, HMCN1, LIX1, JDP2, ADAMTS5, BGN, EDNRB, FSTL1, CHST7, FN1, CD24, BDNF, BCL11A, FBXL7, XIST, TES, FRMD4A, HAUS5, COL3A1, NR2F1, IGFBP5, FOXO3, ROBO2, SLC16A14, FAT3, CCDC3, TMEM200B, LATS2, MFAP2, RNF165, HDAC9, PHACTR3, ST6GAL2, SERPINF1, YPEL3, SYTL3, PRICKLE1, NTRK3, DNAJC15, PCDH18, GFRA2, TNRC18, NR2F2, SATB1, ADAMTS1,…
ENK_UV_RESPONSE_EPIDERMIS_UP	0.367686	1.58234	0	0.0624467	293	271	TGM1, KRT17, TGFA, DLX5, CD47, PGF, HK2, DDB2, PPARD, SLC2A1, FDXR, PYGL, FSCN1, SFXN3, COPZ2, ANGPTL4, FXYD5, SEPT9, ARHGDIB, TREX1, CACNB3, IL4R, LSR, PHLDA3, ITGB4, PFKP, PLCD1, ETS1, VLDLR, SH3BP2, MAP4K4, XRCC1, SLC16A1, RAB31, TYMS, TMSB10, GRK6, OSMR, DSC2, ZAK, TPD52L2, TNFRSF10B, STK39, DKK3, CHST2, RCC1, CDH3, CD24, PROCR, ITGA3, IFITM3, BCL11A, FLNA, ACTN1, GYS1, PDLIM7, CCNG2, FKBPL, …
SCHLESINGER_METHYLATED_DE_NOVO_IN_CANCER	0.427038	1.58163	0.0064851	0.0626904	88	75	KISS1R, PTHLH, CRIP1, LAMA3, LGALS3, MT3, CDH13, NDRG1, FEZ1, EPHX3, PMP22, CD44, CDKN2C, PYCARD, CCNA1, PRKG1, HIC1, DLC1, CDH4, RARA, FBN1, RIPK3, KLF4, RBP7, BCL2, THBD,TNFRSF25, JUN, GNAS, RASSF5, HBA1, TP73, CEBPD, GATA4, MT1A, TFAP2C, NR2F2, EGR3, HOXB13, ALX3, PAX5, GATA5, TCEAL1, PGR, NPTX1, KLHL35, DSC3, SLIT1, FOXA2, TNFSF9, POU3F1, APBA1, PAX6, CYP27B1, FOXE1, AMN, GJB2, WT1,PPP1R13B, …
PID_ARF6_TRAFFICKING_PATHWAY	0.451475	1.5808	0.0189445	0.0628181	49	48	ITGA4,MAPK8IP3, ITGB1, TSHR, ITGA5, EXOC3, PLD2, ITGA7, CTNNB1, EXOC7, EDNRB, EXOC4, ITGA3, ITGA10, VAMP3, PIP5K1C, ITGA1, RALA, KLC1, CPE, ITGA2, ACAP1, IL2RA, ITGA6, ITGA8, ITGA9, ASAP2, NME1, CTNNA1, ARF6, ITGA11, DNM2, CDH1, EXOC1, CTNND1, PLD1, AGTR1, EXOC6, SCAMP2, SLC2A4, ITGAV, EXOC5, ADRB2, EXOC2, BIN1, AVPR2, CLTC, SPAG9
TAKEDA_TARGETS_OF_NUP98_HOXA9_FUSION_10D_DN	0.392897	1.58128	0.0023557	0.0628195	142	119	RAB42, CCL18, FJX1, MREG, HS3ST2, OLFML2B, PLA2G7, TREM2, GPNMB, CORO2A, TCN1, MMP9, RIT1, CXCL5, RPS6KA2, MS4A2, CHIT1, LGALSL, TGFBI, SLFN13, RNASE1, CD24, GGTA1P, IL1R2, NRP1, FRMD4A, STAB1, EMP1, FPR3, ID3, ACE, A2M, CLEC5A, CXCL3, CCL13, C1QA, C1QC, SRPX, SGTB, C1QB, RAPH1, CHI3L1, SLPI, CST7, SLAMF8, S100B, KLF2, LHFPL2, DOCK4, TACSTD2, CD9, PCSK5, C5AR1, IL7R, ANXA3, CXCL1, TSPAN2, ST14, A…
BIOCARTA_CALCINEURIN_PATHWAY	0.56771	1.58097	0.0404355	0.0628965	21	18	NFATC4,MARCKS,NFATC1, SP3,PPP3CA, SP1,CDKN1A,PPP3CC,NFATC2, CALM3, PLCG1, GNAQ, CALM2,NFATC3, CALM1,PPP3CB, PRKCB, PRKCA
REACTOME_PRE_NOTCH_EXPRESSION_AND_PROCESSING	0.480755	1.58082	0.0195804	0.0628998	44	38	CCND1, NOTCH3, E2F1, TP53, NOTCH4, MAML3, SNW1, MFNG, RBPJ, TMED2,POGLUT1, ATP2A2, MAML1, NOTCH2,ST3GAL3, POFUT1, ATP2A3, JUN, MAML2, CREBBP, SEL1L, RFNG, MAMLD1, RAB6A, FURIN, EP300, TNRC6C, LFNG, KAT2A, TNRC6B, ATP2A1,B4GALT1, TFDP1, E2F3, TNRC6A, KAT2B, MOV10,ST3GAL6
KANG_FLUOROURACIL_RESISTANCE_UP	0.546254	1.58004	0.0198777	0.0631259	22	21	DDB2, GPNMB, MDK, TYMS, CLU, KLC1,CDKN1A, NOV, DGUOK, SF3B3, H3F3B,LZTFL1, SRI,IGFBP2, HOXB6, NR2F2,ARID5B, BTG3,OSBPL3, NQO1, CRY1
KEEN_RESPONSE_TO_ROSIGLITAZONE_DN	0.404332	1.57919	0.009627	0.0633407	106	101	CRIP1, SFRP2, FXYD5, MMP9, GNAI2, GMFG, SYN1, TPM1, RPL18, GNB1,SERPINA3, PMP22, ANXA1, CD34, PTEN, BGN, COL1A2, IL10RB, IL1R2, ACTA2, CLU, TES, MGP,SERPINB6, HDC, COL3A1, BNIP2, EMP3, S100A6, IGFBP5, CAPZB, MYH11, BHLHE40, ELN, CSRP1, MEF2A, S100A11, MYLK, CPE, C1QB,SERPING1, TPM4, CD53, CAPZA1, CTSS, DUSP1, CD9, ACTB, CYBA, ANXA3, DYNLL1, CXCL1, DSTN, SAT1, CD14, SRGN, LCP1, PTGES3, CXCL2, PTGI…
SCIBETTA_KDM5B_TARGETS_DN	0.421061	1.57933	0.011194	0.0633895	81	76	NMB, NOL3, FJX1, MCAM, CAV1,LGALS3BP, DPY19L1, SOX9, BRCA1, SWAP70, NEDD9, TUBB, RECQL, SNRPD1, NDC80, KDM5B, ISG15, TTK, CCNB1, LIMCH1, DLGAP5, TOP2A, PBK, REEP1, UBR7, NCAPH, ARL6IP5, KIF2C, OIP5,IVNS1ABP, BUB1B, PSIP1, PHF20, IGFBP2, SMC5, CDCA3, FABP5,ANKRD36B, BUB3, FHL1, PSD3, HMMR, AURKA, EPB41L1, SCNN1A, DHCR24, CDK1, ECT2, MT1E, EIF5B, HSD17B8, PPOX, SPTSSA, SERINC5,ITGB1BP1, MT1H, FBXO5…
REACTOME_SPHINGOLIPID_DE_NOVO_BIOSYNTHESIS	-0.448432	-1.61983	0.021148	0.0634353	31	25	DEGS1, CERS5, KDSR, SPHK1, SGMS2,COL4A3BP, CSNK1G2, ACER2, SPTLC1, VAPA, CERS6, SPTLC2, SGPP2, SGMS1, SGPL1, CERS4, DEGS2, PPM1L, ACER3, SPHK2, OSBP, VAPB, CERS2, PRKD1, SGPP1
MATZUK_CENTRAL_FOR_FEMALE_FERTILITY	0.557519	1.57858	0.0429253	0.0635535	29	19	KISS1R, TGFB1, GNRH1, CPE, CDK4, DDR2, TKT, STAT3, EGR1, NPR2,ACVR2A, CRTC1, GGT1,CDKN1C, LEPR, KISS1, AFP, CGA, GHR
LEE_LIVER_CANCER_ACOX1_UP	0.43778	1.57747	0.0206718	0.0640979	64	60	EDN1, KRT23, RPL12, CBR3, ANXA2, COL4A2, NDRG1,LGALS3BP, TAGLN2, SLC16A1, RPL36, MFGE8, CD24, ETS2, FAM129A, SLC24A3, CD63, ANXA5, TBC1D8, SORBS2, LY6E, PALMD, SLPI, KRT8, HTATIP2, IGFBP2, PLSCR1, CTSE, CSTB, HDAC1, IGFBP1, SGK1, LCN2, SPON2,HLA-DQA1, CD74, MT2A, CIDEC, PLIN2, PEX11A, UAP1L1, ABHD2, FABP4, RAD51B, TM4SF4, APCS, QPCT, PLAT, SLC20A1, GIPC2, LPL, NQO1, RGS2, GPX4, IMPACT, TOX, EHHAD…
DUNNE_TARGETS_OF_AML1_MTG8_FUSION_UP	0.463323	1.5768	0.0190217	0.0644096	52	46	PRG2, HSPA6, OS9, CMTM3, RASGRP2, CXCR4, IGFBP7, ATP2B4, CD24, ITM2C, LAPTM5, NKG7, ATG16L2, NUCB2, MYO1F, LST1, ALDH3B1, SELPLG, CST7, LYZ, CTSG, ICAM3, FNBP1, ALOX5AP, CSF3R, PSTPIP1, SLA, LCP1, PLAC8, RNASE2, IL6R, SPCS3, CD302,C11orf21, S100A8, BTG1, PRRC2C, NFE2, ACOT7, SAMSN1, ARL15, GCA, BPI, FAM192A, PTGER4, CAT
REACTOME_ADP_SIGNALLING_THROUGH_P2RY12	0.569118	1.57596	0.0234375	0.0648077	21	18	GNAI2, GNB1, GNG10, GNG11, GNB4, GNAI3, GNG2, GNGT1, GNB2,P2RY12, GNB3, GNGT2, GNAI1, GNG5, GNG12, GNG7, GNG4, GNB5
DOANE_BREAST_CANCER_ESR1_DN	0.482307	1.57502	0.0183616	0.0652227	48	38	FABP7, SOX11, PGBD5, TTYH1, MID1, EN1, CHST3, DSC2, GABRP, BCL11A, GJB3, EGFR, MMP7, SCRG1, GABBR2, SLPI, UPP1, TTLL4, ARNTL2, KRT5, VGLL1, S100A8, HRASLS,RARRES1, MSLN,IGF2BP3, PAX6, UGT8, BBOX1, ELF5, CRYAB, COL9A3, PSAT1, ASS1, SOD2, FOXC1, SFRP1, MPP6
GAL_LEUKEMIC_STEM_CELL_DN	0.369642	1.57367	0	0.0658253	244	222	LIG1, LGALS3, LAMA4, GALNT12, E2F1, PRDM1, ALOX5, CD1D, MMP9, GIMAP5, TPI1, GINS2, GM2A, ENC1, RAD51, DLX4, LGALS1, DIEXF, CDC45, FNTB, COL6A2, TYMS, CD93, FER1L4,ARHGEF15, CHST15, KIFC1, ASF1B, CDC6, IGFBP7,KIAA0101, CASP1, PHLDA1, NCAPG, MELK, SLC16A6, LILRB1, TNFAIP6, KIF20A, CCNB2, MEGF6, LILRB4, SERGEF, TYMP, E2F2, COL18A1, VCAN, IL2RB, GTSE1, ADAP2, CCNB1, CENPM, ERMAP, KIF18B, CCL5, CCNA2,…
DAIRKEE_TERT_TARGETS_DN	-0.340309	-1.61369	0	0.0658616	124	112	ADAMTS7, PSORS1C1, SMYD2, PLXND1, CELF2, EFNA5, WWC3, UBE2J1, IGFBP7, GLIPR2, FAM110B, MGAT5B, STARD13, UBL3, RAI2, MB21D1, SEC22A, DYNC1I1, EDIL3, BTK, CALD1, VKORC1L1,CTTNBP2NL, KANK3, ERRFI1, MBNL1, DACT1, RPS26, SMYD3, LMCD1, ACAP2, TECPR2, ZNF174, POU2F1, TTN, TGFBR2, ZNF592, SLC30A7, DCLK2, HSPB8, DYNC1LI2, PBRM1, BSPRY, HES2, ATP10A, NEK7, ARHGEF26, REEP3, ANKRD1, MACF1, KIF26A, PACSIN2, C…
GHANDHI_DIRECT_IRRADIATION_UP	0.410344	1.5729	0.0123609	0.0660441	110	91	TNFRSF10C, POU5F1, LAMB3, SLC16A3, PRDM1, TESC, PTPRE, CXCL5, AEN, THSD1, BBC3, PLK3, TNFRSF10B, TRIAP1, BMP2, SLC16A6, INHBA, LAMC2, FAS, FRMD4A, PTGFR, MDM2, BIRC3, CLDN1, POLH, CXCL3, E2F7, ASCC3, SESN1, CDKN1A, MYBL1, DDIT4L, RELB, IL33, BCL2A1, DKK1, TNFAIP3, SLC7A11, SMC5, CXCL1, MT1L, CXCL2, LIF, ZMAT3,LOC100190986, MT1A, C8orf4, ZC3H12C, ICAM1, TSLP, NFKBIZ, IL6, PPP6R1, C2CD4B, MT2A, MMP…
ONDER_CDH1_TARGETS_1_DN	0.383025	1.57296	0.0034169	0.0661161	169	152	PTHLH, TGFA, KRT15, ANO1, HS3ST2, IGFBP3, EDN1, EXOSC2, SLC43A3, ETS1, CHRNA5, ENC1, C10orf10, GPRC5A, ARHGAP25, JAG1, TMEM2, SLC16A1, SOX9, OSMR, DSC2, ARL4C, ZNF365, CDC6, MCM10, PHLDA1, SCEL, PI3, IL1R2, SP100, STARD13, SERPINB8, CCNE2, IFIT5, UTP14A, BRIP1, IMP3, BRCA2, CDC27, TMX1, POGLUT1, CBFB, CASP8, CXCL3, RRS1, ILF3, FEN1, DCBLD2, SERPINB1, ATP13A3, GLIPR1, TOR1AIP1, FOSL1, SYNCRIP, DDX…
SUNG_METASTASIS_STROMA_UP	0.399723	1.57211	0.003663	0.066268	110	105	CD276, P4HA1, PTGFRN, ALOX5, TMEM47, COL5A2, PLK2, ANXA4, PLOD1, CD81, CRABP2, HSPG2, SPARC, SLC16A1, AGRN, COL5A1, LMO4, EDEM1, CD55, SOCS5, PLOD2, SEC24D, TUSC3, CNN3, IFI6, THBS2, VCAN, UACA, PPIB, COL3A1, XYLT1, SPSB1, FZD8, ALCAM, HEXIM1, BNIP3L, MGAT3, DCBLD2, CLIP2, CALR, ETV5, CTDSP2, DKK1, ADAM10, FBLN2, FABP5, TIMP3, FHL1, TKT, THY1, SNAI2, MAP3K8, TRIO, PSD3, TNC, JUNB, VMP1, GOLM1, PT…
REACTOME_MITOTIC_G1_G1_S_PHASES	0.389458	1.57226	0.0046729	0.0662781	137	129	CDKN2A, CCND1, CCND3, CDT1, CDKN2B, E2F1, MCM7, RPA1, MCM5, CDK2, CDC45, MYBL2, TYMS, PKMYT1, CDKN2C, CDC6, MCM10, CCNA1, MCM2, CCND2, POLE2, CKS1B, PSMF1, UBA52, RPS27A, LIN37, RB1, PSMD10, CDK6, E2F2, CCNE2, MCM6, CCNB1, PSMB8, CCNA2, WEE1, RRM2, PSMD3, PRIM1, CDK7, CDKN1A, CDC7, MYC,PPP2R3B, POLA1, PSMB10, ORC1, CDK4, PSMD13, PSMB9, PRIM2, CUL1, POLE, RPA2, LIN9, PSMB1, MCM3, PSMC1, CDKN1B,PPP…
CHIARETTI_T_ALL_RELAPSE_PROGNOSIS	0.553647	1.57096	0.0268139	0.0667945	19	19	RCBTB2, MELK, NDC80, AHNAK, TTK, CENPF, DEK, USP1, MEF2A, CDC7, MYC, H2AFX, BUB1B, CD2, CD8A,HNRNPH1, LRMP, SEC31B, CAT
SEITZ_NEOPLASTIC_TRANSFORMATION_BY_8P_DELETION_DN	0.50418	1.56937	0.0328571	0.0675961	30	29	TGFA, FKBP9, PXDN, CXCR4, COL8A1, DDIT4, CST6, FKBP11, LIMCH1, PIK3CD, CDH4, CDKN1A, CLIP2, SCG5, PHF20, PHF1,SLC2A10, RCN2, L1CAM, MMP1, PSPH, CSF3, UBXN7, IL11, QPCT, GAD1, INSIG1, UQCRC1,SLC19A2
KEGG_COLORECTAL_CANCER	0.437851	1.5686	0.0195822	0.0679206	62	61	CCND1, TGFB1, TGFB2, TP53, TGFB3, BAX,RALGDS,TCF7L1,CTNNB1, MAPK3, TCF7,TCF7L2,PIK3R5, RAC1, AKT1, AXIN1,PIK3R3,PIK3CD, RHOA,PIK3CB, LEF1, SMAD2, BIRC5, MSH6, CASP3, MYC, BCL2, RAC2, SMAD4, MSH2,MAP2K1, AKT3, JUN,TGFBR2, GSK3B, FOS,TGFBR1, APPL1,PIK3CG, APC2, BAD,PIK3CA, APC, AXIN2,PIK3R2, RAC3, MAPK9, MSH3, KRAS, MAPK1, SMAD3, ARAF, MLH1, AKT2,PIK3R1, RAF1, BRAF, MAPK8, CASP9,MAPK10, CYCS
KAPOSI_LIVER_CANCER_MET_UP	0.569071	1.56822	0.029321	0.0680186	18	17	ITGB1, NCK2, TUBB6, MAPK3, CD63, ANXA5, MDFI, CAP1,ARPC1B, KPNB1, STK25, PLCE1, DENR, FGD6, HMGA1, CKS2, ITGAV
WIELAND_UP_BY_HBV_INFECTION	0.408236	1.56733	0.004896	0.068217	101	98	LGALS3, ARHGDIB, GPNMB, GIMAP5, CXCR4, GM2A, TAPBP, ISG20, GBP2, RAB31, PRC1, TYMS, RNASET2, UBE2C, TRIM22, C1orf54, IFI16, HLA-E, TYROBP, PTTG1, FCER1G, LAPTM5, MCM6, CCL5, HLA-F, UBE2L6, PIK3CD, PPT1, RRM2, PBK, HLA-A, IFI27, HLA-B, FCGR1B, S100A10, B2M, CD68, C1QB, PSMB10, RAC2, CD53, SP110, LYZ, PSMB9,HLA-DPB1, CD48, C3AR1, CXCL9, IGSF6, CD3D, APOL3, HLA-C, CECR1, CFL1, IL10RA, GZMA, SRGN, PL…
KANNAN_TP53_TARGETS_UP	0.445747	1.56748	0.0027211	0.0682233	58	54	PDLIM4, DDB2, DGKA, QSOX1, LSR, NDN, FEZ1, BBC3, APOC1, SMTN, PLK3, NEFL, ENG, ACTA2, EXT2, VCAN, FAS, BCL6, ZNF7, CDKN1A, LOXL1, MAN2B1, CTDSP2, FHL2, ABCA3, TAX1BP3, VIPR1, HRAS, PCNA, LCAT, DMPK, TMSB15A, IGFBP6, SMAD7, ATF3, SCRIB, PMAIP1, PLIN2, GALE, APLP1, SLC3A2, DCAF7, BAK1,HIST1H2AC, CES2, SPAG1, MARCH8, GDF15, GADD45A, SURF1, NINJ1, BTG2, TST, PRKAB1
PID_TRKR_PATHWAY	0.447647	1.56753	0.0068213	0.068288	62	59	CCND1, NGF, RASGRF1, SHC2, ELMO1, MCF2L, RIT1, MATK, FAIM, NGFR, SHC1, MAPK3, BDNF, RHOG, RAC1, RGS19, RHOA, CRK, EHD4, NRAS, CRKL, MAP2K1, PLCG1, RAPGEF1, ABL1, HRAS, SOS1, NTF3, TIAM1, CDC42, GAB2, NTRK3, STAT3, RAP1B, GAB1, RAP1A, PIK3CA, DYNLT1, FRS2, SH2B1, DOCK1,ARHGAP32, RASA1, MAGED1, NEDD4L, GIPC1, FRS3, KRAS, MAPK1, NTRK1, DNM1, NTRK2, PRKCZ, PTPN11, PIK3R1, GRB2, PRKCI, DNAJA3, SQSTM1
KEGG_NICOTINATE_AND_NICOTINAMIDE_METABOLISM	-0.498614	-1.60616	0.0350877	0.0688265	24	20	NNMT, NMNAT2, NT5C,NADSYN1, NT5E, NT5M, BST1, NAMPT, ENPP3, CD38, NADK, ENPP1, AOX1, NMNAT1, PNP, NUDT12, QPRT, NMNAT3, NT5C2, NNT
SABATES_COLORECTAL_ADENOMA_UP	0.404878	1.56592	0.0095352	0.0689335	141	107	NMU, GRM8, GRHL3,TNFRSF10C, DUOX2, PTP4A3, EPHX4, KRT23, TCN1, ANLN, MSX1, SERPINA3, TGFBI, CD44, SLC7A5, GABRP, CDH3, TRIM29, PHLDA1, DUSP4, RPL22L1, INHBA, CCL20, SH3TC2, UCA1, TEAD4, RNF183, FABP6, RRM2, CLDN1, NFE2L3, ETV4, CXCL3, MMP7, S100A11, APCDD1, IL13RA2, TRIM7, CHI3L1, KRT80, IL33, TACSTD2, IGFBP2, LRRC36, CXCL1, CADPS, CXCL2, ARNTL2, IRX3, CYP4X1, CXCL11, L1TD1, GALNT6, PCSK1, LCN2, …
BOSCO_TH1_CYTOTOXIC_MODULE	0.403976	1.56561	0.0075282	0.0690389	114	97	RTP4, IDO1, DPCD, RHBDF2, GIMAP5, HAPLN3, GIMAP4, ADORA3, TYMS, SDS, GIMAP7, PLEKHO1, RUNX3, ADAM19, IL4I1, FAM26F, GNLY, MKI67, GIMAP8, CDK6, ISG15, IL15RA, SMOX, GAS6, F2R, STAB1, GZMB, RRM2, NKG7, PRF1, FUT2, KLRD1, CDC7, MYBL1, BCL2, CMPK2, HAMP, FCGR2B, STAT4, CTLA4, ENPP2, TSHZ3, SLA2, IL2RA, CXCL9, CD5, CD163L1, APOL3, LILRB5, P2RX5, CCR5, ITGA9, PRKCQ, HERC6, RNASE2, SAMD3, CD28, CMKLR1, …
REACTOME_CELL_CYCLE_MITOTIC	0.357628	1.56378	0	0.0700303	325	297	CDKN2A, CCND1, RFC2, CCND3, CDT1, LIG1, TUBB4B, CDKN2B, B9D2, E2F1, MCM7, CENPH, CSNK1E, GINS2, RPA1, MCM5, CENPJ, CDK2, CDC45, MYBL2, TUBA1A, CENPK, TYMS, PKMYT1, MAD1L1, NDEL1, RFC5, DSN1, CDKN2C, CDC6, OFD1, UBE2C, MCM10, CCNA1, MCM2, CCND2, TUBB, CEP57, PPP1CC, POLE2, CKS1B, PSMF1, UBA52, KIF20A, CCNB2, RPS27A, LIN37, PLK4, RB1, PSMD10, NDC80, SKA1, PTTG1, RFC4, CDK6, E2F2, CCNE2, AURKB, MCM6…
REACTOME_AXON_GUIDANCE	0.368577	1.56314	0	0.070288	251	225	ST8SIA4, CACNB1, SCN5A, ARTN, TREM2, PLXND1, CACNB3, TRPC4, UNC5B, KIF4A, COL5A2, RPS6KA2, COL4A1, COL4A2, CSNK2A2, ITGB1, ITGA5, NCK2, FES, RGMB, PLXNA3, COL6A2, AGRN, COL5A1, CNTNAP1, EVL, LAMC1, MAPK3, SLIT3, NRP2, NCK1, CRMP1, TRPC6, PLXNA1, CD24, LIMK2, COL1A2, COL1A1, RHOG, DPYSL2,HSP90AB1, EZR, PLXNA2, FYN, SCN4A, ABL2, NRP1, TYROBP, COL6A1, ROBO1, PIP5K1C, MET, CACNA1H, MSN, RAC1, RRAS, E…
MIKKELSEN_NPC_HCP_WITH_H3K4ME3_AND_H3K27ME3	0.372775	1.56245	0.0044543	0.0704167	210	167	SLC30A10, NXPH4, FGF11, BMP8A, PTPRU, DLL4, TGFB1, ACAN, NRARP, RASGRF1, PTGFRN, HOXD13, FOXC2, ZNF296, NDRG1, FOXF2, CXCR4, CCDC85A, CHRNA5, NGFR, TFAP2A, FLT1, WNT9A, FOXF1, GALNT14, ADORA2B, KCNMA1, KLHDC8A, WNK2, ITGA3, BMI1, FAM78A, NMNAT2, NEFL, WNT6, HOXD1, PODN, AHNAK, TEAD4, ADAMTS2, SYNM, UNC5A, A4GALT, BHLHE22, SH3RF3, P4HA2,BAIAP2L1, SLC24A4, GNAL, SMOC2, ADRA2B, NXPH3, CAMKK1, CDKN1A…
PETRETTO_CARDIAC_HYPERTROPHY	0.486506	1.56269	0.0314735	0.0704502	34	33	IGFBP3, COL5A2, ANXA4, EFEMP1, ANXA1, CD44, TM4SF1, FSTL1, FN1, TUBA1B, NID1, ACTA2, PDLIM3, LTBP3, TAGLN, FBN1, LOXL1, ENPP2, ACTB, MFAP5, ASPN, DDX3X, ARID5B, CRIM1, TUBA1C, SNAP23, OGN, CPNE3, OSBPL8, LPL, ABAT,ST3GAL6, RTN4
KLEIN_PRIMARY_EFFUSION_LYMPHOMA_UP	0.452709	1.56245	0.0180807	0.0705175	51	47	PTP4A3, P4HA1, VEGFA, PRDM1, PAM, PLOD1,DPY19L1, LTA4H, GUSB, MUC1, EIF4A1, NCOR2, IL2RB,RABGGTA, GANAB, NFIB, ATP2A2, ILF3, SRGAP2, ADAM15, GPI, GPAA1, SELPLG, BCAP31, AGPAT2, RPN2, GZMA, CASP7, IRF4, TFPI, VARS, CTRL, IL10, LDLR, HSPA4L, CFI, ALG3, DHX30,TNFRSF8,SULT1A1, ZMYM3, GTF3C1, VDR, IQGAP2,ALDH1L1, GLDC, AQP3
CHARAFE_BREAST_CANCER_BASAL_VS_MESENCHYMAL_DN	0.454096	1.56175	0.0239437	0.0706449	50	50	LOXL2, SCG2, GRK5, PFKP, CMTM3, MMP16, COL6A2, DPY19L1,ARHGAP17, SH2B3, BDNF, RNF182, GNG11, TNIP1, ZEB1, MAP1B, GRB10, CD99, SHOX2, BCAT1, KIF3C, EDIL3,ADAMTS12, KLF2, PNMA2, NUAK1, UTRN, ZCCHC24, GFPT2, SEMA3A, TRIO, MB21D2, RBM24, TTC28, TRAF3,ARHGEF40, CNKSR3, ARNT2, AK5, FLNC, APLP1, IL11, FZD2, GULP1, ALPK2, RGS7, STRADB, TUBB2A, FAM92A1,FAM171A1
GNATENKO_PLATELET_SIGNATURE	0.47034	1.56192	0.0229226	0.0706675	48	41	NRGN, GAPDH, UBC, RPL41, RGS10, TAGLN2, SPARC, FLNA, HLA-E, PTMA, CLU, TLN1, CD99, CCL5, YWHAH, B2M, GPX1, ACTB, MYL12A, MYL6, GNAS, HLA-C, CFL1, DYNLL1, H3F3A, RNF24, HBB, PPBP, FTH1,HIST2H2AA3, TOP3B, F13A1, OAZ1, ITM2B, ITGA2B, MLH3, HIST1H2AC, TUBA4A, HIST2H2BE, PGRMC1, NCOA4
TURASHVILI_BREAST_DUCTAL_CARCINOMA_VS_DUCTAL_NORMAL_DN	0.376998	1.56146	0.0034325	0.0706924	198	169	KRT17, TGFA, COL17A1, KRT15, MAP2, LAMA3, CP, SCN4B, LAMB3, BHLHE41, KRT23, MID1, ITGB4, CAV2, ZNF667, C10orf10, ANXA1, SPRED1, SOX9, ADAMTS5, TM4SF1,TNFRSF10B, KRT7, FAM110C, GABRP, CDH3, TRIM29, ATP1A2, SEC14L1, SOCS5, LIN37, CX3CL1, MEGF6, GPM6B, ACTG2, ACTA2, MET, LAMC2, MGP, EGFR, PDLIM3, VTCN1, SORBS2, KRT14, NFIB, SYNM, MICAL3, RND3, CNN1, CCL28, PALMD, RBPMS, DLG5, MMP7, MYH11, TAGLN, FBX…
REACTOME_G_ALPHA1213_SIGNALLING_EVENTS	0.418785	1.5612	0.017744	0.0707795	74	69	ADRA1B, PLEKHG2, RASGRF1,ARHGEF17, GNB1, TBXA2R, OBSCN, GNG10, AKAP13, PREX1, ARHGEF6, RHOG, GNG11, GNB4, ARHGEF2, GNA12, RAC1, GNG2, GNA13, PIK3R3, GNGT1, RHOA, RHOB, GNB2, ARHGEF1, ABR, ROCK1, FGD2, ARHGAP4, RAC2, VAV1, KALRN, FGD1, SOS1, TIAM1, CDC42, TRIO, RHOC, GNB3, ARHGEF9, ITSN1, GNGT2, ROCK2, RASGRF2, PIK3CA, ECT2,ARHGEF16, GNG5, ADRA1A, GNG12, PIK3R2, NGEF, MCF2,ARHGEF11, SOS2, GNG7, AR…
NGO_MALIGNANT_GLIOMA_1P_LOH	0.58047	1.5608	0.0396825	0.070941	17	16	VIM, ANXA2, GAPDH, P4HB, PGK1, TPM3,HSP90AB1, RPSA, ENO1, TPM4, HNRNPK, HSPA5, STMN1, SEPT2, PARK7, ECHS1
GOUYER_TATI_TARGETS_DN	0.563723	1.55946	0.0393343	0.0716726	17	16	PTP4A3, CSPG4, MCAM, IGF2, FN1,A4GALT, TAGLN,S100A4,IGFBP2, FABP5, SNCG, TIMP4,MAPK12, LOXL4, BMP7, HPN
KANNAN_TP53_TARGETS_DN	0.548688	1.55921	0.0342679	0.0717247	21	20	PMP22, ARL4A, BRCA1, CDC6, EIF4A1, CXADR,COL18A1, LAMC2, BIRC3, SORL1, TMEM97, APBA2, CCNE1, NOP14, FOSL2,SLC19A1, PPAT, PURA, CPM, G0S2
BILANGES_RAPAMYCIN_SENSITIVE_VIA_TSC1_AND_TSC2	0.419437	1.5577	0.0163728	0.0724547	73	71	NOL3, RPL10A, BTF3, VIM, IMPDH2, RPL36AL, RPL35A, NAP1L1, RPL3, IGBP1, HNRNPA1, EIF3E, TOMM20, RPL31, RPL36, PGK1, BGN, RPS20, EIF2S3, TUBB, ACBD6, NSA2, KDELR1, ZNF496, SERPINB6, PPIB, RPS21, CCT4,C14orf166, NME2, ACTG1, FXR1, POLR1C, RPS28, RPS26, TSPAN15, SSR4, RPH3AL, OLA1, PPM1G, HSPB11, NAA10, PAICS, SLC25A17, PRCP, BLVRB, AIMP1, GYG1, VDAC1, GTPBP6, NUDT21, TUBB4A, BCS1L, EIF3K, TCP1, ATP6…
WHITFIELD_CELL_CYCLE_G2	0.373283	1.55721	0.0022599	0.0726711	182	171	NMB, SAP30, TUBB4B, FAM110A, ANLN, MID1, BTNL9, TUBD1, TFAP2A, NNMT, TUBA1A, ARL4A, TIMP1, CDKN2C, KIFC1, UBE2C, LIX1L, HAUS8, TUBB, STK17B, NR3C1, MELK, GABPB1, KIF20B, MUC1, NDC80, MET, AURKB, TRIM59, UACA, CDC42EP4, KBTBD2, MND1, TRAIP, EMP1, LTBP3, IFNAR1, CCNA2, PKNOX1, HMGB2, TOP2A, CCDC107, SKA3, CDC25C, FAM72B, CDCA8, C14orf80, CDC16, HJURP, NCAPH, IQGAP3, PIF1, CASP3, EBI3, SORL1, LMNB1,…
REACTOME_APOPTOTIC_CLEAVAGE_OF_CELLULAR_PROTEINS	0.49137	1.55688	0.0231884	0.0727452	40	33	PKP1, VIM, GSN, PLEC, LMNA,CTNNB1, STK24, CASP8, PTK2, CASP3, DSG2, LMNB1, BMX, ROCK1,BCAP31, DBNL,SPTAN1, PRKCQ, DSP, ADD1, TJP1, CASP7, SATB1, CDH1, FNTA, ACIN1, BIRC2, APC, MAPT, CASP6, PRKCD, TJP2, GAS2
SIMBULAN_PARP1_TARGETS_UP	0.496537	1.55638	0.0274964	0.0729858	31	31	CCND1, COL8A1, CD81, CAV1, PRRX2, EEF2, CCND2, TIMP2, MGP, MDM2, S100A6, ELN, CDKN1A, NOV, CTTN, MFAP5, ANXA3, APP, TIMP3, IGFBP6, CCNG1, TINAGL1, FST, IGFBP4, ID1, FGF7,SERPINE2, DCN, COL4A5, GPX3, AK1
SATO_SILENCED_BY_METHYLATION_IN_PANCREATIC_CANCER_2	0.470647	1.55591	0.022792	0.0731424	50	39	NPTX2, MAGED4B, SFN, BST2, ANGPT2, ISG20, IGF2, TP53I11, CDH3, LDOC1, IFI6, CCNE2, TES, BNIP3, CDKN1A, CLDN5, BARD1, CSF1,TNFRSF25, TNF, ST14, LHX1, TIMP3, IL1R1, JPH3, KLK10, PLEK2, STAG3, SMARCA1, CDKN1C, PAX6, FOXE1, PLAT, RPRM, TJP2, NEFH, HOXA1, UCHL1, SFRP1
HUNSBERGER_EXERCISE_REGULATED_GENES	0.508863	1.55511	0.0335277	0.0734932	31	26	NPTX2, SCG2,SLC6A1, SYN1, LDHA, GIT1, MFGE8, ELK1, IL16, UBE2B,MAP2K2, EGR1, EGR2, VGF, CSF3,MAGED1, MAPK1, DUSP6, NTRK2, GAD1, CADM1, GRB2, PRKCI, ODC1, PCK1, NRTN
SHEPARD_BMYB_TARGETS	0.422202	1.55488	0.0050761	0.0735374	74	64	SOX11, HLX, NOVA2, ANLN, MDK, HEY1, S1PR1, PRC1, MELK, MKI67, AURKB, TPX2, GTSE1, TTK, CCNB1, NR2F1,C17orf49, FOXM1, DLGAP5, ASPM, BIRC5, NOTCH2, PRR11, GPSM1, CDC20, TACC3, KIF14, CDCA3, TOX3, PTPRN, SLX1B, LHX1, TK1, CDCA2, TTN, NUMA1, TNXB, KIF11, UCP2, PCDH18, ARID5B, NDE1, BMS1, POU3F3, MASTL, DDX17, CDK1, MT2A, POU3F1, CKAP2, FGFR4, CCNB3, FBXO5, HMGA1, KIF23, RTKN, PLP1, GOLGB1, PHF20L1, A…
SCHOEN_NFKB_SIGNALING	0.498334	1.55445	0.0312036	0.0736847	34	31	IGFBP3, EDN1, MMP9,SERPINA3, PMP22, JAG1, FN1, SULF1, BIRC3, BCL6, IGFBP5, KLF4, C3, HHEX, CTSS, NFKBIA, CSRNP1, CDKN1B, CXCL2, PTX3, TNFRSF9, CTGF, CYR61, TPST1, PTGS2, THBS1, IL1B, CCL2, GADD45B, PTGER4, NUAK2
GARCIA_TARGETS_OF_FLI1_AND_DAX1_DN	0.377579	1.55258	0.0035047	0.0746924	176	155	NR0B1, NT5DC3, RSL1D1, HAPLN1, RPS8, NPM1, HOXD13, DTL, SLC43A3, NDN, GINS2, CASP2, NCAPH2, CDK2, MYBL2, TRMT1, DENND2C, DNAH2, PSMC3IP, ARHGAP17, KIAA0319, TYMS, FANCE, CDC6, MCM10, RCC1, INF2, SFR1, BICD2, WDR76, CDC37, GABPB1, UBA52, CHAF1B, KCNE3, PTMA, E2F2, H2AFZ, GINS3, C19orf48, KIAA1143, C11orf84, CENPM, ZNF93, TCF19, ZNF114, RRM2, GEMIN5, CDCA5, RIMBP3, FEN1, UTP23, NOP56, RBP7, LMNB1, …
REACTOME_N_GLYCAN_ANTENNAE_ELONGATION_IN_THE_MEDIAL_TRANS_GOLGI	-0.523246	-1.59351	0.0292553	0.074832	18	16	MGAT3, MGAT2,B4GALT2,B4GALT3,B4GALT5, MGAT4B, FUT8,B4GALT1,B4GALT4,ST6GAL1, MGAT5, MAN2A1,ST8SIA6,ST8SIA2, MGAT4A,B4GALT6
DELPUECH_FOXO3_TARGETS_DN	0.467761	1.55125	0.0264993	0.075083	41	40	EPB41L4A-AS1, SLC1A4, VEGFA, SLC7A1, IMPDH2, APEX1, PRC1, UBE2C, EFNB2, MKI67, CENPF, FOXM1, EXOSC8, AREG, SHMT2, NEK2, MTHFD2, NUSAP1, SMC4, ZWINT, C6orf48, LARS, AURKA, PYCR1, TIAL1, MB, KIF22, DTYMK, CEBPG, HAX1, H1F0, CDC42EP3, NUPR1, XPOT, PCK2, GADD45A, IARS, AARS, PITX2, PFN2
JIANG_TIP30_TARGETS_UP	0.464372	1.55184	0.0151099	0.0750873	46	44	P4HA1, IGFBP3, CALCRL, ANXA2, JAG1, RAPGEF5, TMSB10, AXL, EEF2, CD24, NEDD9, IFITM2, FYN, IRS1, NDC80, PTTG1, VCAN, WEE1, BCL6, MALT1, MTAP, NFIL3, DUSP1, ITGA6, IGFBP1, MGEA5, NDE1, IER3,PPARGC1B, HNMT, PPP1R2, CDK1, MMP3, CYR61, PSMC6, CHST6, ENPP1, C1GALT1, RAB1A, RAD17, LAMB1, CDH2, STAM2, ARG2
REACTOME_DNA_REPLICATION	0.369318	1.55125	0.0022676	0.0751907	192	178	RFC2, CDT1, LIG1, B9D2, E2F1, MCM7, CENPH, GINS2, RPA1, MCM5, CDK2, CDC45, CENPK, MAD1L1, NDEL1, RFC5, DSN1, CDC6, MCM10, CCNA1, MCM2, PPP1CC, POLE2, PSMF1, UBA52, KIF20A, RPS27A, RB1, PSMD10, NDC80, SKA1, RFC4, E2F2, AURKB, MCM6, CENPM, KIF18A, PSMB8, NUP85, CCNA2, RCC2, PSMD3, CENPP, PRIM1, ITGB3BP, CDCA8, PLK1, BIRC5, NUF2, FEN1, BUB1, PPP2R5C, CDKN1A, CDC7, CENPI, MAD2L1, KIF2C, POLA1, CENPQ,…
LA_MEN1_TARGETS	0.505894	1.55084	0.0384025	0.0752284	24	24	PRKCDBP, BCL6B, FGF13, ITGA5, SALL3, ADAM19, IGFBP5, CNN1, CASP8, HOXB8, DDR2, SORBS1, FRRS1, ANP32A, RGS16, AZI2, TSPAN7, F3,HSD17B11, CRABP1, SNX10, NUPR1, BEX1, PTER
LOPES_METHYLATED_IN_COLON_CANCER_DN	0.501195	1.55135	0.0310651	0.0752349	28	27	CDKN2A, SORBS3, TFAP2A, TSHR, BDNF, EBF3, RUNX3, NR3C1, MSH6, RPA2, ERCC1, TP73, GSTP1, RBP1, SMAD9, APC,EPM2AIP1, TERT, THBS1, CDKN1C, DRD1, RPA3, MLH1, GATA3, FHIT, THRB, PITX2
LI_CISPLATIN_RESISTANCE_UP	0.515992	1.55051	0.0294551	0.0753053	28	24	EGLN3, EPHA3,COL11A1, HAPLN1, GJA1, ANO3, TMEM2, CKLF, UACA, TWIST1, PEG10, ITM2A, IGF1R, CYP1B1, VWDE, IRX3, TFPI2, KYNU,SMARCA2, ZBTB20, MGST1, NEBL, THSD7A, CDH2
PID_EPHA_FWDPATHWAY	0.489511	1.55031	0.017094	0.0753123	34	32	EPHA3, EFNA3, EFNA5, PIK3R6,ARHGEF15, FYN, LYN, PIK3R5, EFNA1, RHOA, CRK, HCK, ROCK1, EPHA2, CRKL, PLCG1, CBL, EPHA6, FGR, PIK3CG, VAV2, BLK, LCK, EPHA4, YES1, SRC, NGEF, EPHA1, EPHA5, CDK5, VAV3, EPHA7
HELLER_HDAC_TARGETS_SILENCED_BY_METHYLATION_DN	0.361289	1.54991	0	0.075351	281	268	CDKN2A, CCND1, SLC1A4, VEGFA, LRRC41, ZNF532, COPZ2, RPL10, HSPA6, FXYD5, GJA1, CBR3, PDK1, CELF2, ANP32B, ITGA4, IFNAR2, RASGRP3, FAIM, HNRNPUL1, LRP2BP, SERPINH1, TCF4, PXDN, CLEC2B, ISG20, TSHR, SDC1,LINC00341, FLI1, GUCY1A3, MYBL2,TNFRSF10D, UBE2J1, DDIT4, TYMS, ZHX2, SLC7A5, CD180, GALNT14, CDKN2C, IL21R, CHST15, MFNG, CASP1, TRIB3, FAM129A, CCND2, IFI16, CD79B, NR3C1, MYB, CBS, RBM3, SEC24D…
AIYAR_COBRA1_TARGETS_UP	0.472593	1.54994	0.0271041	0.0754444	39	38	TOMM20,SERPINA3, TPBG, TIMP1, DEGS1, IFITM1, TRIB3, UBL3, MGP, NENF, CLDN1, AREG, NEK2, FHL2, MBTPS1, DNAL4, PIP,C1orf159, PBRM1, ASNS, SATB1, TMEM50A, EPRS, S100A8, ENAH, FBXL6, PARP4, TFF3, FRS2, PRCP, CTSB, RRNAD1,MAPK8IP2, ACOX2, APOD, PRLR, GADD45A, ASS1
PID_HIF1A_PATHWAY	0.567335	1.54913	0.0361842	0.0757029	19	18	CDKN2A, EGLN3, OS9, TP53, EGLN1, HIF1AN, HIF3A, EGLN2, ARNT, NAA10, RBX1, TCEB1, CUL2, COPS5, TCEB2,HSP90AA1, HIF1A, VHL
KEGG_PROSTATE_CANCER	0.404976	1.54876	0.0036675	0.0757157	89	87	TGFA, CCND1, PDGFD, E2F1, TP53, RELA, CDK2, PTEN, TCF7L1, CTNNB1, MAPK3, PDGFRB, PDGFA,HSP90AB1, CREB3L4, TCF7, RB1, TCF7L2, PDGFC, PIK3R5, E2F2, CCNE2, AKT1, EGFR, PIK3R3, MDM2, PDGFB, PIK3CD, PIK3CB, LEF1, ATF4, HSP90B1, CDKN1A, BCL2, NRAS, CREB1, IGF1R, MAP2K1, AKT3, NFKBIA, CDKN1B, CREBBP, HRAS, SOS1, CREB5, IKBKG, CREB3, GSK3B, MAP2K2, EP300, PIK3CG, GSTP1, FGFR1, BAD, CREB3L1, CCNE1, PIK3CA…
MURATA_VIRULENCE_OF_H_PILORI	0.529311	1.54877	0.0438066	0.075817	24	22	COL6A2, SOX9, CCND2, DPP4, MUC1, COL6A1, ICK, GAS6, MMP13, BCL6, CDKN1A, CTTN,TMPRSS4, AIM2, MVP, S100A9, L1CAM, MMP1, IL11, CRISP3, FUT6, SOD2
GINESTIER_BREAST_CANCER_20Q13_AMPLIFICATION_DN	0.377782	1.54771	0.0070588	0.0762343	180	156	DAPK2, SLC15A4, HLX, PPARD, ZNF532, PLXND1, DMD, CASP4, MCM5, TAPBP, CYTH1, NUP62, EXOC3, ITPR3, ARHGAP17, TCIRG1, MYO9B, EHBP1L1, KIFC1, AKAP13, OFD1, QSOX2, HNRNPD, TOPBP1, TNIP1, GRAMD4, MKI67, DAZAP1, TLN1, LIMD2, BTN2A1, PTBP1, FANCL, ANKLE2, ACE, POGLUT1, MAD2L1BP, RNPS1, FBXL19, RAB35, DDX39B, DHX37, CLK3, ACSL5, GTPBP2, KIAA1147, TJAP1, PPHLN1, SBNO2, RNF220, CSNK2B, CYBA, TNFRSF25, MCM3,…
GAVIN_PDE3B_TARGETS	0.522034	1.54748	0.0455259	0.0763043	22	22	SYTL1, TGFB1, SYTL2, ENTPD1, LAMC1, SYT11, GZMB, EBI3, CTLA4, NCF4, NT5E, IL2RA, NCF1C, CYBB, TFPI, IL10, IL18, F13A1, SYPL1,TNFSF10, HMOX2, FGL2
BOYLAN_MULTIPLE_MYELOMA_C_UP	0.450535	1.54676	0.027027	0.0765001	47	44	LPCAT1, FAM110A, ANGPTL4, PPM1F, EBF1, ETS1, TYMS, DHX38, HNRNPD, DYRK2,MARCKSL1,KIAA1462, DPP4, FAM13A, FAM53B, TSPY26P, NASP, ASB2, NFYA, CSTF1, LRIG1, ARVCF, ZFPM1, MCM3, SPIB, EMID1, CAD, STX2, ZMYND19, SKP2, HEATR1, FOXP4, PDE2A, CPSF6, LGR5, VPREB3, RLIM, FKBP3, RBKS, CLIP1, MTOR, PTER, SMTNL2, PTGR1
BOSCO_INTERFERON_INDUCED_ANTIVIRAL_MODULE	0.417688	1.54687	0.0025349	0.0765484	78	74	TTYH2, CD40, PML, ITGA4, PRAF2, IFI44, IFI44L, P2RY14, TRIM22, IFITM3, RIN2, LILRB1, APOL1, NOD1, IFI6, IFIT5, UBE2Z, PTPN2, OAS3,APOBEC3G, IRF7, SDC3, MB21D1, OAS2,SLC25A28, MX1, XAF1, RSAD2, LAMP3, OASL, GBP4, MYO1G, SLAMF7, MS4A6A, LAT, STAT2, CD80, ZBP1, DDX60, EPSTI1, IFIT3, IFIH1, TDRD7, IFI35,TMEM176A, APOL6, NCOA7, SAMD9L, TRAFD1, CDK1, TNIP3, IFIT1, NUB1, GBP7, SLC39A8, DHX58, CCL2, ARAP…
LI_WILMS_TUMOR_VS_FETAL_KIDNEY_2_UP	0.496193	1.54628	0.0303907	0.0766975	30	30	SLC43A3, NAP1L1, ENC1, NGFR, ROR2, CRABP2, IGF2, H2AFZ, VCAN, EFNB3, PRIM1, SET, BIRC5, MEOX1, EZH2, HMGA2, HOXD9, BUB3, HEXB, WHSC1, CDK1, IGF1, HDGF, STMN1, NCAM1, MYCN, NCAM2, HOXA1, HOXA10, DDX1
KEGG_SPHINGOLIPID_METABOLISM	-0.4238	-1.58801	0.013289	0.0773356	40	34	DEGS1, KDSR, SMPD4, SPHK1, SGMS2, GLA, GALC, UGCG, CERK, ACER2, GBA, SPTLC1, ARSA, SPTLC2, SGPP2, SGMS1, SGPL1, SMPD3, DEGS2, NEU1, UGT8, ENPP7, NEU4, ASAH2, ACER3, NEU3,GAL3ST1, SMPD2, SPHK2, GLB1, SMPD1,B4GALT6, ASAH1, SGPP1
REACTOME_DEVELOPMENTAL_BIOLOGY	0.354345	1.54494	0	0.0774471	396	345	ST8SIA4, CACNB1, LEFTY1, SCN5A, CDK19, ARTN, CCND3, TGFB1, MED6, ANGPTL4, TREM2, PLXND1, CACNB3, TRPC4, EBF1, UNC5B, KIF4A, COL5A2, MEF2C, MED10, RPS6KA2, COL4A1, TCF4, COL4A2, CSNK2A2, MEF2D, ITGB1, ITGA5, NCK2, FES, RGMB, RELA, PLXNA3, COL6A2, AGRN, COL5A1, CNTNAP1, EVL, LAMC1, CTNNB1, PCSK6, NR5A2, MAPK3, SLIT3, NRP2, MED13L, NCK1, CRMP1, TRPC6, MED26, PLXNA1, CD24, LIMK2, COL1A2, COL1A1, RBPJ…
SHEN_SMARCA2_TARGETS_DN	0.365244	1.54406	0.0021906	0.077792	357	225	CA9, GABRD, HTR6, FABP7, PADI1, PVT1, LZTS1, HK2,C15orf39, SYT12, KSR1, SLC16A3, PREX2, E2F1, DGCR9, RUNX1, BMP1, B3GNT4, DLX4,PSORS1C2, SEPT4, MYBL2, GPR21, SEMA6B, MFNG, DGCR14, KLHDC8A, RIN3, CALB2, RPS12, SCN4A, NOX5, ADD2, COL6A1, IL18BP, DIAPH1, S1PR4, MIER2, NNAT, TREM1, NFATC1, SNAI1, NCLN, MAP1A, EFNB3, PDGFB, MMP19, NENF, CCNK, GLP1R, RUNX2, BIRC5, GPR3, SPDEF, REEP2, ADRA2B, GPR75, EDI…
NIELSEN_LEIOMYOSARCOMA_UP	0.567504	1.5441	0.0371517	0.0778768	18	17	HOMER2, PLOD1, PLEC, MICAL2, VEGFC, KCNN4, CCL5, COL7A1,SH3BGRL3, LOXL1, SLAMF8, CXCL9, AIM2,HLA-DQB1, CAPG, MME, MTR
KEGG_CELL_ADHESION_MOLECULES_CAMS	0.389716	1.54315	0.0059453	0.0782792	134	120	HLA-G, CD276, CD40, NRXN3, PTPRM, PECAM1, ITGA4, CDH5, NLGN4X, NLGN2, ITGB1, PTPRF, SDC1, JAM3, CD34, CNTNAP1, ICAM2, CDH3, CLDN3, ITGB2, HLA-E, CD58, VCAN, CLDN7, CD99, HLA-F, SDC3, CLDN1, HLA-A, GLG1, CDH4, ALCAM, CD4, MPZL1, HLA-B, ESAM, ITGB8, CD86, CLDN5, ITGAM, CTLA4, SELPLG, CD6, SIGLEC1,HLA-DPB1, ICOS, CD2, CD8A, CD80, MPZ, ITGA6, NLGN1, ITGAL, HLA-C,HLA-DQA2, CADM3, ICAM3, ITGA8, SPN, IT…
REACTOME_CHEMOKINE_RECEPTORS_BIND_CHEMOKINES	0.459573	1.54293	0.0196353	0.0783092	57	43	CCR10, CXCL5, CXCR4,CXCL16,CX3CL1, CCL20, CCL5, CCL17, CCL28, CCR7, CXCL3, CCL22, CXCL6, CXCL9, CCR5, CXCL1, CXCR3, CXCR6, CCL4, CXCL2, XCR1,CXCL11,CXCL13,CX3CR1, CCL19, CCL3, PPBP, XCL2,CXCL10, CCR6, CCL21, CXCR2, CXCR5, CXCR1,CCL3L1, CCR2,CCL3L3, CCR1, CCR4, XCL1, CCL2, CCL11,CXCL12
CONCANNON_APOPTOSIS_BY_EPOXOMICIN_DN	0.376103	1.54267	0.0069525	0.0783814	172	152	HK2, DUSP7, ELMO1, ALDOC, MXI1, NUDT1, PDK1, PFKP, RPS6KA2, ADM, RAPGEF4, CXCR4, GM2A, LDHA, DPY19L1, TMSB10, EXOSC9, MYOF, RGS13, KIFC1, UBE2C, KIAA0101, CD24, KCNMA1, LIMK2, PCOLCE, MARCKSL1, BCL11A, PPFIA4, TNFAIP6, MARCKS, MYB, GNG11, LDOC1, DNASE1L1, MKI67, PTTG1, VCAN, MFSD10, AURKB, EID1, TWIST1, DLGAP5, CCNA2, NFIB, FAM127A, HMGB2, TOP2A, PPEF1, LSM2, NFE2L3, PLK1, BIRC5, IGSF3, S100A4, B…
REN_BOUND_BY_E2F	0.430546	1.54193	0.0051881	0.0787237	61	61	RFC2, MCM5, TP53, RAD51, CDK2, CDC6, RB1, NDC80, PTTG1, RFC4, E2F2, H2AFZ, MCM6, TTK, CCNA2, TOP2A, CSTF1, FEN1, MAD2L1, BARD1, POLA1, CENPA, ORC1, RAD54L, H2AFX, PRIM2, MSH2, RRM1, POLD1, UMPS, MCM3, SMC4, DBF4, RBL1, PCNA, BUB3, RFC3, TK1, CHEK1, SUPT4H1, DUT, CENPE, HMGB1, POLA2, BRD2,HIST2H2AA3, CBX5, CDK1, SMC2, HIST1H3D, E2F3, UNG, CDC25A, HIST1H2AC, PRKDC, RPA3, HIST2H2BE, MLH1, HMGB3, NAP…
PID_SYNDECAN_2_PATHWAY	0.49193	1.54104	0.0345324	0.0789706	33	29	LAMA3, TGFB1, CAV2, ITGB1, ITGA5, BAX, CASK, MAPK3, FN1, EZR, RHOA, MMP2, CASP3, ITGA2, PRKACA, HRAS, NF1, SDC2, LAMA1, RASA1, SRC, SDCBP, MAPK1, EPHB2, PRKCD,TRAPPC4, MAPK8, KNG1, EPB41
NING_CHRONIC_OBSTRUCTIVE_PULMONARY_DISEASE_UP	0.381364	1.54113	0.0045767	0.0790366	157	145	SYTL1, TGFB1, RPL4, RPL23A, HEYL, FHOD1, RPL22, RPL14, CDH5, CPA3,HNRNPUL1, TRIOBP, WWP2, CILP2, SDC1, ITGA5, GPRC5A, RPS23, RPL13, TMSB10, SERBP1, TM4SF1, SEPT7, KRT7, SSRP1, VWF, INPP1, HNRNPA0, RPS15A, CSK, HLA-E, CX3CL1, EIF4A1, TPM2, PNRC1, RPLP1, LAPTM5, RPS15, RARRES2, PTBP1, RAMP3, A2M, TLE2, ALCAM, GYPC, CYBRD1, ILF3, RARS, CDKN1A, EGFL7, CLDN5, EIF1, CLCC1, SLPI, KLF2, OXA1L, GPSM1, H3F…
PID_TXA2PATHWAY	0.438955	1.54128	0.012016	0.0790576	57	53	GNAI2, GNB1, TBXA2R, PRKCH, PIK3R6, PTGIR, FYN, PRKG1, LYN, PIK3R5, GNA12, RAC1, AKT1, GNG2, EGFR, GNA13, MAPK11, RHOA, ARRB2, ARHGEF1, PTGDR, HCK, GNA15, RAB11A, ROCK1, NOS3, PRKACA, TGM2, GNAQ, FGR, PRKCQ, PLCB2, ICAM1, PIK3CG, BLK, LCK, YES1, SRC, SELE, PRKCB, GNA14, DNM1, PRKCZ, GNA11, PRKCD, PRKCA, VCAM1, SYK, EGF, MAPK14, PRKCE, GNB5,SLC9A3R1
REACTOME_GENERIC_TRANSCRIPTION_PATHWAY	0.353599	1.54009	0	0.0794274	352	323	NR0B1, ZNF350, ZNF248, PPARD, NOTCH3, ZNF577, ZNF614, MED6, ZNF615, NR2C2AP, SKI, CDKN2B, ZNF394, ZNF613, ZNF416, MED10, ZNF256, ZNF649, ZNF226, NOTCH4, ZNF337, RARG, ZNF473, MAML3, ZNF25, ZNF230, NR5A2, ZNF773, SNW1, TRIM28, ZNF565, ZNF205, MED26, RBPJ, ZNF320, NR3C1, ZFP28, ZNF282, ZNF304, ZNF17, ZNF382, UBA52, RPS27A, ZNF559, ZIK1, ZNF263, NCOR2, ZNF12, ZNF496, ZNF419, MED15, ZNF595, TEAD4, ZN…
POMEROY_MEDULLOBLASTOMA_PROGNOSIS_DN	0.465926	1.53886	0.026648	0.0799093	43	42	CRIP1, RPL10A, RPS8, RPL11, RPL7A, RPL35A, RPS25, RPS19, RPL27A, MYBL2, RPS18, RPL29, RPS10, CENPF, BYSL, ENO1, SNRPD2, BARD1, ATP5G2, NCAPD2, SNRPA1, SRI, CAD,SLC29A1, TKT, FGFR3, CBX5, NME4, DAG1,B4GALT1, IFRD1, UBE2D3, HMGA1, CDC25B, ERP29, TRAP1, IARS, COX8A, UCHL1, ATIC, E2F5, LDHB
FERREIRA_EWINGS_SARCOMA_UNSTABLE_VS_STABLE_UP	0.376643	1.53887	0.0034884	0.0800166	167	147	GJC1, SAP30, ZNF532, C4orf3, ANLN, CASP4, CHAF1A, TGFB3, CENPK, BRCA1, PAG1, CDC6, KIAA0101, INF2, HMGN2, BLM, NCAPG, MELK, POLE2, SNRPD1, NDC80, BRD9, DAZAP1, H2AFZ, BRIP1, TPX2, ATAD2, CCNB1, MND1, KIF18A, DNTTIP2, ZNF93, CENPF, DLGAP5, CEP55, CCNA2, HMGB2, TOP2A, CHTF18, CENPP, NCAPG2, DSCC1, HJURP, NCAPH, FEN1, KIF15, PIF1, XRCC3, GIT2,ARHGAP11A, SNRPD3, PDE4A, WDHD1, LMNB1, ODF2, NUSAP1, KIF…
REACTOME_NCAM_SIGNALING_FOR_NEURITE_OUT_GROWTH	0.437858	1.53901	0.0380577	0.0800373	64	55	ST8SIA4, CACNB1, ARTN, CACNB3, COL5A2, COL4A1, COL4A2, COL6A2, AGRN, COL5A1, MAPK3, COL1A2, COL1A1, FYN, COL6A1,CACNA1H, COL3A1, PTK2, COL6A3, NRAS, CREB1, MAP2K1, COL9A1, HRAS, SPTAN1, SOS1, CACNB2, GFRA2, MAP2K2, SPTA1, FGFR1, PRNP, CDK1,RPS6KA5, SPTBN1, SPTBN5, SRC, NCAM1, KRAS, MAPK1, COL9A3, COL9A2, SPTB, COL4A5, YWHAB, GFRA1, SPTBN4, CACNB4, GRB2, RAF1,ST8SIA2, NRTN, SPTBN2, COL4A4, COL4A3
LEE_LIVER_CANCER_E2F1_UP	0.427201	1.53829	0.0108548	0.0801457	62	62	KRT23, ANXA2, CASP4, COL5A2, TAGLN2, ANXA1, SPARC, RPL36, IFI44, MFGE8, XDH, ETS2, COL1A1,KIAA1462, CD63, ANXA5, ACTG2, CXADR, RHOB, LY6E, PALMD, FMO3, NUCB2, CPE, ACTG1, BCL2A1, NT5E, CTSS, MCL1, PPL, KRT8, PLSCR1, SPTAN1, CTSE, CSTB, MMP12, IGFBP1, LCN2, GSTM1, SPON2, CXCL10, CD74, IFIT2, TFF3,TMEM176B, DYNLT1, GSTM2, UAP1L1, FABP4, LEPR, RAD51B, TM4SF4, PLAT, SPINK1, GGH, LPL, CYP39A1, USP18, …
PID_AR_PATHWAY	0.432448	1.53743	0.020436	0.0805093	61	58	CDKN2A, CCND1, CCND3,TGFB1I1, PA2G4,HNRNPA1, TCF4, UBE2I, GSN, KDM3A, CTNNB1, PIAS3, BRCA1, KDM4C, CTDSP1, CDK6, AKT1, PELP1, CASP8, LATS2, CTDSP2, FHL2, SVIL, PATZ1, CDK11B, XRCC5, TMF1, PIAS1, SRF, XRCC6, ZMIZ1, MED1, APPL1, UBE3A, TGIF1, PIAS4, NRIP1, HIP1, CARM1, KLK3, NCOA6, AR, KDM1A, UBA3, ZNF318, PRKDC, SNURF,RPS6KA3, VAV3, NKX3-1, RANBP9, NCOA2, PAWR, NCOA4,TMPRSS2, FKBP4, PRDX1, PTK2B
HORIUCHI_WTAP_TARGETS_DN	0.352817	1.53721	0.0021482	0.0805491	310	291	ST8SIA4, PGF, LRRC17, CHRNA1, NRARP, PLP2, RPL15, MCM7, ANLN, ANGPT2, UHRF1, KIF4A, IMPDH2, PECAM1, RPL7A, CDH5, SNRPA, NAP1L1, RPL3, FBL, RASSF2, ARL6IP6, CXCR4, EBPL,C10orf10, MYBL2, RPL13, LDHA, DPY19L1, LRRC8C, WDFY1, PRC1, TYMS, CD44, PGK1, RFC5, GNG10, FAM64A, ASF1B, UBE2C,KIAA0101, CRIP2, TMEM123, CSK, NCAPG, LXN, MELK, EDEM1, FLNA, PURB, CCDC86, RPL22L1, CKS1B, KIF20A, CCNB2, IPO11, NDC80…
QI_PLASMACYTOMA_DN	0.395496	1.53751	0.0063131	0.0805738	100	95	NOL3, VEGFA, IGFBP3, INHBB, DDOST, MATK, COL5A2, BMP1, CSNK1E, COL4A2, P4HB, EPAS1, COL6A2, TIMP1, FSTL1,MYBBP1A, COL1A1,SPARCL1, CALU, EIF4A1, ICK, LAMC2,RABGGTA, GANAB, CTSW, AEBP1, ETV4, P4HA2, SND1, ITGB5, MMP2, MYC, RNF25, SVIL, MAGEH1, SLPI, AGR2, MFAP2, STT3A, STAT2, SKIL, ST14,DNAJB11, CHST1, SEC63, IPO4, LYVE1, MED29, PTGIS,SEC61A1, MYH14, DUSP22, SENP2, UBE2T, NOL8, KAT2A, LZTR1, ENPEP,…
VERHAAK_AML_WITH_NPM1_MUTATED_DN	0.361855	1.53667	0.0010941	0.0807684	246	225	MREG, FLNB, VEGFA, TGFB1I1, CD200, ADCY3, GJA1, TPSB2, PTPRM, TPSAB1, PLXND1,CSGALNACT1, TCN1, TMEM204, MMP9, TRIB2, ARHGEF17, TRAF5, PAM, MEF2C, RPS6KA2, PXDN, FGF13, VLDLR, CAV1, DCHS1, ISG20, PTRF, GSN, ERG, C20orf27, CD34, TGFBI, HSPG2, SPARC, EVL, LAMC1, SPRY1, PTGIR, IFI44, IFI44L, LPAR6, ZHX2, TSPAN13, PROM1, LMO4, IGFBP7, IFITM1, FAM129A, ITM2C, CCND2, IFI16, RUNX3, DPYSL2, EZR, GPM6B, TC…
PHONG_TNF_RESPONSE_VIA_P38_PARTIAL	0.375267	1.53522	0.0034247	0.0812382	160	155	PTHLH, TGFA, ZNF395, FJX1, IL4R, TRIB2, PLK2, CALHM2, FAM46A, ADM, TGFB2, HEY1, TAPBP, LBH, LHFP, IFNGR2, AGRN, LAMC1, PLAUR, CD44,TNFRSF10B, KANK2, CHST11, EFNB2, PHLDA1, BDNF, DUSP10, BID, KCNN4, BMP2, IRS1, INHBA, CCNG2, CCL20, TCF7L2, FNDC3B, RIPK4, EGFR, ID3, BCL6, COL7A1, PGRMC2, ALCAM, CXCL3, HEXIM1, PDE8B, SPHK1, BAZ1A, CDKN1A, IL27RA, GLIPR1, TTC27, SLC39A14, FZD7, CREB1, NFKB2, KLF6, SE…
ROVERSI_GLIOMA_COPY_NUMBER_UP	0.40003	1.53536	0.0074349	0.0812573	100	87	LECT1, DDB2,PPP1R13L, ELMO1, MDK, ZNF296, ARHGAP1, APOC1, ZNF408, GEMIN7, ZBTB45, TRIM28, TSPAN13, AHR, EXOC3L2, CD3EAP, GALNT7, CALCR, MARK4, SLC35C1, LRP4, FOLH1, XRCC2, SPI1, PHF21A, RELB, SMARCD3, ZNF584, NLGN1, SLC7A11, ZNF324, ERCC1, CLASRP, GALNT9, UBE2M, FOSB, PSMC3, GALNT5, CHST1, DGKZ, MZF1, KLC3, PCDH18, APOC4, GALNT6, PTPRN2, BCAM, DGKI, PIK3CG, BCL3, APOC2, CREB3L1,CEACAM19, TOMM40, …
TERAO_AOX4_TARGETS_SKIN_DN	-0.465164	-1.57983	0.0125	0.0812915	27	22	ZNF608, FKBP15, C7orf31, DDIT4L, C5orf45, MAU2, RGS18, ABCD2, ESF1, SCAF11, IGF1, ZNF354B, SNURF, C5orf22, DMXL1, UCHL1,C17orf75, FAM126B, ACSL6, SAMD5, KLHL13, ESRRG
BOYAULT_LIVER_CANCER_SUBCLASS_G123_UP	0.451902	1.53563	0.0258503	0.0813135	45	44	SGCE, ACLY, NT5DC2, DUSP12, SHC1, CD24, KIF20A, SNRPD1, CCNB2, RBM3, RFC4, SNRPB, ATAD2, CBX1, PEG10,ISG20L2, SNRPE, PON2, BARD1, CKAP4, SMC4, MRPL9, FABP5, PLCB1, PNMA1, CPD, HAT1, POGK, GINS1, UBAP2L, ENAH, CPSF6, TMPO, SAC3D1, LARP4B,CAPRIN1, KPNA2, VIL1, TUFT1, PRKDC, CACYBP, PRKCI, CCT3, MAP4K3
TSENG_IRS1_TARGETS_UP	0.396634	1.53542	0.0060241	0.0813298	113	105	B4GALNT1,LOC284023, LAMA4, CDKN2B, RPL39L, NDN, MEF2C, ACLY, FAP, PTPRF, CRABP2, MYBL2, GBP2, PRSS23, ADORA2B, PAG1, ZNF22, KIAA0101, EFNB2, CD24, TRIB3, PDGFA, GJB3, TCF7, DDX47, TES, MGP, NNAT, NR2F1, COL7A1, CARS, FEN1, NOP56, BUB1, MTHFD2, SRPX, ACTN4, APCDD1, SERPING1, TMEM97, DDX18, SIGLEC1, CPXM1, GTF2IRD2, RHOU, CYBA, SLC35C2, ACTR3, NSUN2, PPIH, DBNL, HSPB2, UCK2, WISP1, FHL1, SF3A1, XRC…
TIEN_INTESTINE_PROBIOTICS_24HR_DN	0.361481	1.53478	0.0032967	0.0814345	214	212	SLC1A4, VEGFA, SLC7A1, RPL4, LAMB3, RPL10, RPL23A, RPS24, RPL12, UNC5B, RPL5, RPL3, RPS19, NDRG1, RPL27A, RPS3, PABPC1, UBC, PTPRF, RPL41, RPS2, JAG1, EIF4B, RPL37A, P4HB, RPS23, EEF1G, RPS18, RPL13, RPL23, MTA1, RPL34, RPS11, DDIT4, PRR15L, PDIA3, EEF2, CDC6, CDC5L, RPLP0, PHLDA1, TRIB3, RPS14, SH3GLB1, CEP57, ST6GALNAC4, ZNF282, RPS6, CD55, KDELR1, KLF5, TMED2, ARHGEF2, RPL13A, PNRC1, SLC35E1, …
FIGUEROA_AML_METHYLATION_CLUSTER_3_DN	0.47557	1.53452	0.0391872	0.0814918	42	34	AHNAK2, PPARD, KDM4B, MARVELD1, PLEKHA4, CRTC3, ZNF853, NECAP2, AHNAK, ARHGAP10, MAML1, NOS3, EPHA2, PPP1R15A, PLEK, SLC45A1, KIAA2013, ARF6, PHLDB1,HIST1H2BJ, C12orf10, MED25, SEZ6L, PLEKHG4B,LINC00242, EIF3A, GPR17, BATF2, TLR1, RHOT1, PKDCC, SLC26A9, TSFM, TMEM33
STEARMAN_TUMOR_FIELD_EFFECT_UP	0.482678	1.5341	0.035503	0.0816725	36	34	CD200, APOC1, CTSZ, ITGAX, CTSD, PLD3, CTSK, LY75, CSF2RB, LAPTM5, IQGAP1, SIRPA, NOV, CD68, SCARB2, CHI3L1, CTSS, CLEC4A, MYO7A, SAT1, MPEG1, CSTB, SOCS3, LRG1, PTGS1, LCN2, ITIH4, CMIP, WDR81, ACP5, LPL, SPP1,SERPINA10, F7
REACTOME_A_TETRASACCHARIDE_LINKER_SEQUENCE_IS_REQUIRED_FOR_GAG_SYNTHESIS	0.509951	1.5323	0.0392749	0.082587	25	24	CSPG4, GXYLT2, SDC1, B3GAT3, HSPG2,B3GALT6, AGRN, BGN, VCAN, GPC1, SDC3, GPC6, BCAN,B4GALT7, GPC2, GXYLT1, SDC2, B3GAT2, SDC4, DCN, GPC5, GPC4, B3GAT1, GPC3
ZHANG_TARGETS_OF_EWSR1_FLI1_FUSION	0.407101	1.53242	0.0100125	0.0826152	88	85	CCND1, SLC1A4, IL1RAP, GRK5, PFKP, RNF113A, GPSM3, CAV2, CSNK1E, MSX1, CAV1, CSPG5, SH2B3, CRIP2, IFITM1, RUNX3, DPYSL2, HLA-E, STAT6, STARD13, KDSR, CEBPB, CD99, RCOR1, GLG1, ARHGEF1, SIRPA, CSRP1, JAK1, LY96, MYC, CDH11, RHOH, CD79A, FADS1, HOXD9, FNBP1, CD1E, FCGRT, ID2, DAPK1, NELL2, SLC17A7, IGFBP4, FOS, ADO, GLCE, PSEN1, SMARCC1, MAN2A2, NPTXR, SEL1L3, EGR2, VWA5A, AK4, SYT1, PPFIA3, WDR47,…
NAKAMURA_TUMOR_ZONE_PERIPHERAL_VS_CENTRAL_UP	0.352888	1.53113	0	0.0832388	285	264	MYEOV, CD47, ANO1, LAMA3, TUBB4B, CYGB, LAMA4, GDF11, NEURL1B, KIF4A, PGM2L1, CAV2, PTPRK, ETS1, CMTM3, AATF, COL4A1, GINS2, TCF4, TPM1, PMEPA1, MCM5, FGF13, CAV1, EFEMP1, FLI1, TUBA1A, TGFBI, PSMC3IP, ARAP3, AXL, PRSS23, KRT7, DKK3, PEA15, INF2, GPR39, ITGBL1, FN1, BDNF, FAM129A, COL1A2, TUBA1B, ADAM19, NCAPG, EZR, POLE2, CMTM7, CCNB2, INHBA, UBE2D2, GPM6B, PHF19, NID2, RFC4, CNN3, LRRC8A, MAP1B…
MULLIGHAN_NPM1_MUTATED_SIGNATURE_2_UP	-0.315997	-1.57533	0	0.0833604	139	122	MCHR1, RAB38, SH3GL1, TRPM8, RAD51, LHFP, CLSPN, SLC39A1, HFE, MYO1C, SUN1, CCDC71, CTBP2, PKNOX1, FAM127A, PDE3A, PAK1IP1, RYBP, CSTF1, MBNL2, RCE1, LIMS1, CENPQ, PBX3, SMC4, ZNF768, PLCB3, SOX13, BMPR1A, HOXB6, CFD, ORC6, MAP6D1, CARD9, MEIS1, PPP1R26, STAG2, CRP, ZXDC, NPAT, RBM5, PDS5B, MAN2A2, RAD1, HOXB2, RER1, NEK7, DCK, NIPBL, PKN2, METAP2, EGFL6, SPG7, HNRNPH3, TANK, HOXB3, SRSF7, WRAP73…
TONKS_TARGETS_OF_RUNX1_RUNX1T1_FUSION_HSC_DN	0.370866	1.53024	0.0033784	0.0833975	187	173	TFR2, CCND1, SLC1A4,C15orf39, CCND3, PRG2, PLP2, SLC16A3,ARHGEF10, SLC43A3, TESC, PDLIM1, RASSF2, TPM1, CXCR4, LGALS1, PMP22, PTPN12, TGFBI, LCP2, MYL4, MICAL2, STK10, SLC7A5, CCNA1, DUSP10, DYRK2, RUNX3, ACTN1, ADCY7, CD55, TYROBP, CSF2RB, IL17RA, LAPTM5, SMOX, HDC, CHST12, XYLT1, STAB1, PIK3CB, BIRC3, CBFA2T3, NKG7, CD52, IGFBP5, SPI1, TEAD3, CCR7, LAT2, RARA,SH3BGRL3, S100A4, MMP2, FCGR2A, PLC…
PID_CDC42_REG_PATHWAY	0.488453	1.53003	0.0464396	0.083434	30	30	ARHGEF25, DOCK6, MCF2L, DOCK9, ARHGAP1, ARHGEF7,ARHGAP17, GIT1, ARHGEF6, ARHGDIA, DOCK10, PLCG1, FGD1, NME1, CDC42, ARHGEF9, ITSN1, RACGAP1, VAV2, APC, DNMBP, NGEF, MCF2, SPATA13, RALBP1, VAV3, ITSN2, DOCK11, BCAR3, FARP2
KYNG_RESPONSE_TO_H2O2	0.415268	1.53052	0.0191327	0.0834455	71	68	OAZ2, PTP4A3, MCAM, RPL7A, RPL5, HNRNPA1,SERPINH1, CD81, TAL1, RPL31, RELA, PRKCSH, CTNNB1, RCC1, PLXNA1, IL10RB, ENG, TCF3, PFDN5, IFI6, TAP1, EID1, CCNA2, HCFC1R1, AEBP1, TSPAN4, COMMD6, CD68, FLOT2, MPV17, C4BPA, CST3, CTSS, CDC34, RPL21, SRGN, CFD, DUT, ZBTB7A, HMOX1, RAB36, ANKRD1, ATP6AP1, DNAJB1, CD59, CTSB, PPP1CA, UNG, SLC20A1, PKIA, ORAOV1, CCNH, COX6C, TUBA4A, CRYAB, SLC39A7, CUX1, ATP…
MCLACHLAN_DENTAL_CARIES_UP	0.357489	1.53031	0.0010787	0.0834762	254	234	CCL18, PTP4A3, SLC1A4, IBSP, ARHGDIB, PLA2G7, GPNMB, ALOX5, CD1D, MMP9, PECAM1, CXCL5, ADM, CXCR4, CLEC2B, LSP1, NNMT,C10orf10,SERPINA3, APOC1, PLAUR, RAB31, LCP2, CD44, CD93,ADAMDEC1, LRRC15, TIMP1, CHST15, SLC2A3, RNASE1, PHLDA1, ITGB2, TNFAIP6, CD55, HCLS1, INHBA, PI3, TYROBP, LYN, COL15A1, TYMP, CSF2RB, FCER1G, LAPTM5, MGP, TREM1, STAB1, CCL5, FKBP11, GZMB, BIRC3, CD37, CRLF1, REEP1, CD4, TNF…
KEGG_HEMATOPOIETIC_CELL_LINEAGE	0.414187	1.53065	0.0151134	0.0834835	88	72	IL3RA, IL4R, CD1D, ITGA4, ITGA5, CD34, CD44, EPO, ITGA3, CD55, IL1R2, ITGA1, CD1A, FCGR1A, CD37, CD4, ITGAM, ITGA2, IL2RA, CD2, CD9, CD8A, CSF1, CD5, ITGA6, CD3D, IL7R, TNF, CD33, CD3E, CD7, CD1E, CSF3R, CD36, CD14, CSF2RA, CSF1R, CD3G, IL1R1, CD22, CD1C, FLT3LG, IL6R, HLA-DRA, CD8B, CD19, FCER2, TFRC, ANPEP, IL6, MS4A1, ITGB3, FLT3,HLA-DRB1,HLA-DRB5, IL7, CD59, CSF3, EPOR, CR1, ITGA2B, IL11RA, K…
MUELLER_COMMON_TARGETS_OF_AML_FUSIONS_DN	0.511321	1.52952	0.0386266	0.083671	31	25	CACNB1, PFKFB4, SH3BP2, DCHS1, IFI44L, ELF4, CCRL2, MKNK1, VRK1, EZH2, HSF4, DOC2A, ATP2B1, VRK2, PLSCR1, DRD4, PIM1, SDC4, NOP14,HLA-DRB5, CCL2, HNF4A, GTPBP1, STK3, PCDHGB4
REACTOME_PLATELET_HOMEOSTASIS	0.41916	1.52931	0.0164975	0.0836925	78	70	ATP2B2, PDE1B, NOS2,GUCY1B3, PECAM1, GNB1, KCNMB1,GUCY1A3, ITPR3, PTGIR, PDE5A, GNG10, TRPC6, MRVI1, GNG11, GNB4, PRKG1,GUCY1A2, GNG2, PDE9A, GNGT1, PDE3A, ATP2A2, GNB2, PTPN6, PDE10A,PPP2R5C, P2RX1, NOS3, ATP2A3, KCNMB4, GNAS,PPP2R1A, FGR, PDE6B, STIM1, GNB3, SLC8A3,PPP2R5D, GNGT2, PDE2A, ORAI1,PLA2G4A, APOB, TRPC3, GNG5, ATP2A1, GNG12, SLC8A1,PPP2R5A,PPP2R5E, PDE1A, PRKG2, PPP2CA,PPP2R1B, NOS1,…
KEGG_AUTOIMMUNE_THYROID_DISEASE	0.482166	1.52863	0.0286533	0.0840068	53	32	HLA-G, CD40, TSHR, HLA-E, FAS, HLA-F, GZMB, PRF1, HLA-A, HLA-B, CD86, CTLA4,HLA-DPB1, CD80, HLA-C,HLA-DQA2, FASLG,HLA-DPA1, CD28,HLA-DQB1, HLA-DOB, HLA-DRA, CD40LG,HLA-DQA1, IL10,HLA-DRB1,HLA-DRB5, HLA-DMA, HLA-DMB, HLA-DOA, TG, CGA
ZHU_CMV_8_HR_UP	0.445655	1.52842	0.0235457	0.0840336	47	46	IDO1, PML, TRIM21, MSX1, IFITM1, CD55, HLA-E, SP100, IFI6, ISG15, PSMB8, CCL5, BRCA2, OAS2, MX1, SLC39A14, IRF2, RIPK1, TNFAIP3, MX2, OAS1, EGR1, GTF2B, BCL7B, GBP1, MLLT3, CXCL10,HIST2H2AA3, IL6, PLA2G4A, GMPR, IFIT1, NR4A3, NAMPT, NR4A1, PTGS2, B3GNT2, ATF5, IL11, TRIM26, LGMN, WARS, GCH1, IRX2, DNAJA1, ALAS1
AFFAR_YY1_TARGETS_DN	0.359712	1.52819	0.0011099	0.0840748	234	210	MCHR1, CRIP1, CDT1, LIG1, TMEM45A, EDNRA, MCM7, NDN, UHRF1, ITGA4, CENPH, PCDHB12, PRDX4, MCM5, TNFSF11, WISP2, POF1B, KHDRBS1, TGFBI, APOC1, B3GAT3, ALOX15B, PRC1, SCARB1, DKK3, CDC6, CHST2, TRIB3, GJB3, NCAPG, ADCY7, KIF20A, GNB4, CCNB2, STEAP4, MKI67, COL15A1, RFC4, THBS2, EXO1, RIPK4, AURKB, TTF1, MCM6, TTK, FOLH1, FOXM1, ZNF143, CCNA2, HMGB2, TOP2A, ASPM, CHTF18, MMP13, TRIP13, NASP, IGFBP5,…
REACTOME_SIGNAL_AMPLIFICATION	0.498547	1.52799	0.0349854	0.0841115	31	28	GNAI2, GNB1, P2RY1, TBXA2R, GNG10, GNG11, GNB4, GNAI3, GNG2, GNA13, GNGT1, GNB2, GNA15, GNAQ, P2RY12, GNB3, GNGT2,PLA2G4A, GNAI1, GNG5, GNG12, SRC, GNA14, GNA11, GNG7, GNG4, MAPK14, GNB5
HOQUE_METHYLATED_IN_CANCER	0.431015	1.52663	0.0259563	0.0847736	56	51	CDKN2A, SFN,CDKN2B, CDH13,TFAP2A, APOC1, BRCA1, EDNRB, CCND2, RUNX3, TIMP2, BMP2, CALCR, HIC1, VCAN,TWIST1, CHFR, GFAP,RASSF1, FOXN2, FANCF, TIMP3, GATA4, SFRP4, SOCS3, DRD4, PAX5, GATA5, CDH1, GSTP1, RBP1, RARB, SEZ6L, MGMT, APC, PTGS2, SOCS1, APOD, WT1, ESR1,CREBL2, MLH1, CADM1, ME3, FHIT, DAB2, HOXA5, SNRPN, QDPR, FABP3, SFRP1
MOHANKUMAR_TLX1_TARGETS_DN	0.371652	1.52675	0.0045403	0.0848013	193	154	ST8SIA4, FXYD3, FGF11, PVT1, GRHL3, RNF39, LAMB3, GALNT12, DIRAS2, SHC2, PREX2, IL4R, UNC5B, FAM198B, FGF13, CLIC3, SERPINA3, GPRC5A, ANXA1, GUCY1A3, DSC2, C1orf216, MATN3, DKK3, ZNF22, JAZF1, ZNF853, MARCKS, MUC1, FAM26F, CALCR, AUTS2, PTCH2, HIGD1A, MAP1B, LAMC2, EML1, TSPO, ARHGEF37, MGLL, HLA-F, S100A6, ARHGAP42, LDB3, ALCAM, AREG, MCMBP, PDE8B, NYNRIN, IGSF3, GPC6, NMI, KLF6, EIF4EBP1, SLCO2…
MARZEC_IL2_SIGNALING_UP	0.390219	1.52537	0.0074074	0.0853422	115	106	HK2, TNFRSF4, CCND1, CCND3, VEGFA, TGFB1, ADCY3, DUSP7, SPRED1, ZAK, CDC6, PEA15, GNL3, AHR, PHLDA1, TRIB3, CCND2, DUSP4, SPRED2, POLE2, BMP2, PTRH2, CSF2RB, CCNE2, IL2RB, SERPINB9, POLR2D, BIRC3, RHOB,TNFRSF10A, PHLDA2, DKC1, PRKX, TNFAIP8, PDE4A, MYC, TNFRSF1B, BCL2, TNFRSF18, IL2RA, CSRNP1, MAPKAPK2, UMPS, POLR1C, CARD10, IL10RA, UCK2, CSF2RA, LIF,TNFRSF12A, PDCD11, CARD9, PUS1, DHODH, JUND, S…
LINDSTEDT_DENDRITIC_CELL_MATURATION_B	0.439231	1.52519	0.0210526	0.0853569	53	53	LAMB3, ADM, CXCR4, PDGFA, DUSP4, MARCKSL1, MARCKS, TNIP1, KLF5, LYN, PNRC1, IL15RA, TAP1, ADORA2A, BIRC3, STK4, LAMP3, NFKB2, RELB, IL2RA, NFKBIA, CD80, MAFF, IL7R, TNFAIP3, SIAH2, CSF2RA, ZNF267, ID2, CASP7,PALM2-AKAP2, TNFRSF9, NBN, SLAMF1, MAP3K14, BTG1, SDC4, CFLAR, EED, NR4A3, CYTIP, N4BP2L2, REL, JRK, TNFAIP2, NFKB1, TRAF1, OPTN, PSME2, HIVEP1, USP12, GADD45A, CD83
REACTOME_S_PHASE	0.38886	1.52545	0.0121065	0.0854078	109	105	CCND1, RFC2, CDT1, LIG1, MCM7, GINS2, RPA1, MCM5, CDK2, CDC45, RFC5, CDC6, CCNA1, MCM2, POLE2, CKS1B, PSMF1, UBA52,RPS27A, RB1,PSMD10, RFC4, CCNE2, MCM6, PSMB8, CCNA2, WEE1, PSMD3, PRIM1, CDK7, FEN1,CDKN1A, MYC, POLA1,PSMB10, ORC1, CDK4,PSMD13, PSMB9, PRIM2, CUL1, POLD1, GINS4, POLE, RPA2, PSMB1, MCM3, PSMC1,CDKN1B, PSMA1, PSMA6, PSMD4, PCNA, RFC3, PSMC3, ORC6, PSMB2, ORC3, SKP2, MAX, POLA2, MCM4…
MIKKELSEN_IPS_HCP_WITH_H3_UNMETHYLATED	0.448627	1.52547	0.0273438	0.0855096	80	46	PCDHB10, JPH2, SLITRK2, RASGRP3, NT5DC2, PCDHB12, COL8A1, XYLT2, TAL1, PCDHA7, PCDHB15, LRRC8E, SPAG8, GOLGA7B, FSCN2, PCDHB14, ABCC9, PCDHB4, AHRR, MFAP2, BAHCC1, PCDHA6, SST, GRID2IP, SLC45A1, CCDC110, CYP4X1, PCDHB11, SPIRE1, ADCYAP1, KCND3, GIGYF1, SSTR2, SCGN,KIAA1755, POMC, FTL, SH3D19, KCNH6, NOS1, CLIC5, NAP1L5,C19orf71, EDAR, DIRAS1, MARCH10
PID_IL2_STAT5_PATHWAY	0.494528	1.5236	0.0300429	0.0862899	30	28	CCND3, JAK3, SHC1, CCND2, CDK6, IL2RB, CCNA2, PRF1, SP1, JAK1, ELF1, MYC, BCL2, IL2RA, SOS1, FASLG, GAB2, LTA,STAT5B,BCL2L1, FOXP3, IL2RG, LCK,PIK3CA,PTPN11,PIK3R1, GRB2,STAT5A
LAU_APOPTOSIS_CDKN2A_UP	0.43154	1.523	0.0200803	0.0866076	55	55	E2F1, TRAF5, TP53, CASP2, MYBL2,TNFRSF10D, BRCA1,TNFRSF10B, CASP1, BID, PTRH2, CLU, FAS, SIAH1, PDCD6, BNIP2, RHOB, CASP8, BNIP3, PDCD4, CDKN1A, MYC, BCL10, BAG5, CIZ1, NFKBIA, APAF1, CDKN1B, TNFAIP3, CARD10, PCNA, FADD,TNFRSF12A, TP53BP2, PDCD11, BCL2L1, ACIN1, BCL2L11, DIABLO, TRAF3, TNFSF9, CFLAR, MYCBP, PAK2, GMNN, BCLAF1, NDUFA13, PAK4, TRAF4, DAP, PDCD6IP, GADD45A, PAWR, RAD21, CYCS
CHEOK_RESPONSE_TO_HD_MTX_UP	0.541332	1.52262	0.0583596	0.0866407	23	18	SLC1A4, ANXA2, BAX, ARL4C, FLNA,TYROBP,S100A4, MYLK, NFKB2, LYZ, CTSG,S100A9,S100A8, IL32, ATM, OLFM4, MPO,ABLIM1
SANA_TNF_SIGNALING_UP	0.404278	1.52263	0.0138889	0.0867519	83	79	CTHRC1, LAMB3, BST2, SSPN, LGALS9, TAPBP,LGALS3BP, C1QTNF1, IFI44L, CASP1, APOL1, INHBA, TNIP1, CX3CL1, CCL20, OAS3, SLC7A2, RIPK2, OAS2, BIRC3, RHOB, SLC15A3, HLA-A, CXCL3, MX1, HLA-B, ATP13A3,KIAA1147, CMPK2,SERPINE1, SAMHD1, CXCL6, CSF1, NFKBIA, IL7R, APOL3, HLA-C, DDX60, TNFAIP3, LIPG, SAT1, MX2, CXCL2, IFIH1, CXCL11, OXR1, OAS1, ANO9, ICAM1, SAMD9L, GBP1, FTH1, PARP14, CXCL10, C1S, TLR2, MMP…
HILLION_HMGA1_TARGETS	0.406012	1.52233	0.0141935	0.086776	90	77	HTR6, RPL11, CXCL5, RPL36AL, RPL19, RPS19, CHRNB1, CXCR4, TGFB3, PMP22, RPL13, RPS11, EEF2, EDNRB, CRIP2, TIMP2,HSP90AB1, RPS12, RPS17, INSR, IRS1, ALDOA, CLU, AKT1, MIF, ID3, RPS3A, P2RX1, B2M, NME2, NRAS, ATP5G2, NFKBIA, C5AR1, RPL21, PSMA1, CFL1, HRAS, PCNA, NME1, TK1, CXCL2, ID2, CD3G, LIMK1, STAT3, FOS, TFRC, TACR1, ID1, ACHE, IGF2R, GSTM2, ERBB2, NEO1, TAC1, HSPB1, VCP, MYCN, ARAF, PLCD4, P…
REACTOME_INFLAMMASOMES	0.546428	1.52209	0.0454545	0.0868044	17	16	PANX1, CASP1, PYCARD,HSP90AB1, NLRP1, P2RX7, BCL2, NLRP3, NLRC4, APP, PSTPIP1, MEFV, AIM2, BCL2L1, TXNIP, TXN
KEGG_GRAFT_VERSUS_HOST_DISEASE	0.478884	1.52149	0.029872	0.087091	42	31	HLA-G, HLA-E, FAS, HLA-F, GZMB, PRF1, HLA-A, HLA-B, KLRD1, CD86,HLA-DPB1, CD80, TNF, HLA-C,HLA-DQA2, FASLG,HLA-DPA1, CD28,HLA-DQB1, IFNG, HLA-DOB, HLA-DRA, KLRC1,HLA-DQA1, IL6,HLA-DRB1,HLA-DRB5, IL1B, HLA-DMA, HLA-DMB, HLA-DOA
ODONNELL_TARGETS_OF_MYC_AND_TFRC_UP	0.414219	1.5208	0.0161893	0.0873292	83	77	DAPK2, SYTL1, PTAFR, IL4R, ALOX5, RCBTB2, BTNL9, LGALS9, ANXA4, IDS, LCP2, CD44, SLC2A3, TRIM22, STK17B, TSC22D3, SORBS2, MXD4, CD37, C1RL, GLIPR1, ITGAM, APCDD1, TMEM156, KLF6, CD72, LYZ, RGS1, MYO1G, JUN, ZBP1, YPEL2, CD27, SAT1, MPEG1, ID2, IL13RA1,TP53INP1, PDE4B, MAP3K8, ZMAT3, PYHIN1, LMO2,HLA-DQB1, UCP2, PTGS1,TNFRSF14, CX3CR1, HLA-DOB, SATB1, CD69,HLA-DQA1, F11R, POLD4, ZNF594, SCARA5, TX…
BENPORATH_ES_1	0.346704	1.52055	0.0010526	0.0874091	379	340	LECT1, LEFTY1, NMU, EGLN3, AMD1, OAZ2, GPR176, POU5F1, IDO1, CDT1, TUBB4B, SFRP2, GJA1, NPM1, RPS24, LSR, NUDT1, MCM7, DBNDD1, PDK1, KIF4A, SNRPA, GINS2, AEN, SPRY4, MCM5, FGF13, EXOSC5, NLGN4X, CHAF1A, TNNT1, CRABP2, KCNS3, ITPR3, SLC16A1, TCF7L1, EXOSC9, SERBP1, MFGE8, FAM64A, PROM1, CDC6, TRIM22, CHST7, MCM10, GNL3, CRMP1, CD24, IFITM1, MCM2, ATP1A2, POLE2, CBS, BRIX1, ADD2, DIAPH2, TTLL12, GP…
HU_GENOTOXIN_ACTION_DIRECT_VS_INDIRECT_4HR	0.480139	1.52083	0.0315186	0.0874207	37	32	NONO, UBC, DVL2, VWF, ICAM2, KCNJ2, PITPNB, NRP1, BACH1, SSBP2, LOXL1, NR1H2, ARF5, PPIE, CLK2, MCL1, ACTB, NFKBIA, SMC4, GZMM, YWHAG, SNAI2, CD28, SLC1A2, SDHAF1, IFT46,ATP6V0A2, SYT2, KRAS, DMBT1, PFKM, ACAA2
BURTON_ADIPOGENESIS_PEAK_AT_0HR	0.419509	1.52018	0.0142487	0.0875776	63	61	HLA-G, COL11A1, SFRP2, TPM1, COL8A1, ASAP1, TGFB3, RALGDS, PDGFRB, VEGFC, TRIB3, MARCKS, CTSK, CCNG2, ACTA2, THBS2, ISG15, MGP, SERPINB9, TLN1, FLOT1, UBE2L6, MXD4, MYL9, NOV, PSMB10, KLF2, CSF1, MAP4, AES, RUNX1T1, TIMP3, NAA10,RAB11FIP5, SERF2, APBB1IP, PLIN2, F3, IGF1, OGN, CALML4, NEAT1, PLAT, LPL, FAH, SPP1, PDGFRA, CRYAB, FZD2, PCK2, CYB5R1, GAS1, DDIT3, IDH1, SORD, ADH1C, DAB2, GADD45A, RA…
MACAEVA_PBMC_RESPONSE_TO_IR	0.402822	1.51981	0.0164975	0.0875824	104	88	DDB2, EDA2R, LIG1, FDXR, RAP2B, IKBIP, PLK2, AEN, ANXA4, BBC3, MAP4K4, ZNF337, APOBEC3C,TNFRSF10D, BAX, PPM1D,TNFRSF10B, TRIAP1, TRIM22, SPATA18, ZNF79, ACTA2, TRIM32, PCNP, CDS2, RPS27L, FAS, RINL, DCP1B, MDM2, TNFSF4, APOBEC3H, POLH, TMEM30A, E2F7, ASCC3, ANKRA2, SESN1, CDKN1A, CCDC90B, PHPT1, TNFSF8, PCNA, CD70, TP53INP1, CCNG1, EI24, ZMAT3, PYHIN1, GLS2, ACER2, NSD1, POLR2A, LRMP, MAMDC4, RRM…
NING_CHRONIC_OBSTRUCTIVE_PULMONARY_DISEASE_DN	0.382571	1.51998	0.0110565	0.0875991	121	116	CD47, HPCAL1, LGALS3, EHD2, RPS24, RAMP2, RPL12,SH3PXD2A, RPL17, SH3BP2, SCGB3A1, GNB1, B3GAT3, RPS18, MMP14, COL1A1, STK24, IFITM3, TIMP2, RPS16, RPS12, CST6, SPARCL1, SERINC3, CALU, PFDN5, CNN3, SNRPB, GDI1,C10orf54, COL3A1, UBE2L6, RNPEPL1, CD52, RPS3A, ATP2A2, RPS29, SET, CAPZB, C3, PPP2R5C, CCDC80, ST3GAL3, CORO1C, TMEM231, C5AR1, HDAC2, EHMT2, RPS28, CANX, GOLGA2, MLXIP, FGR, AOC3,ARHGAP26,…
LINDVALL_IMMORTALIZED_BY_TERT_UP	0.411736	1.51956	0.0064935	0.0876615	78	74	STC2, RILPL2, TRIOBP, FOXF2, TAPBP, CAV1, EFEMP1, RGS10, ARID5A, PDE5A, TRIM28, IGFBP7, CTSZ, NAB1, VAMP3, COL15A1, FRMD4A, POLE4, EXT1, FKBP11, MDFIC, A2M, PELI1, PGM5, SLC38A2, EIF3CL, SLC6A8, CALD1, APCDD1, FZD7, ATP2B1, ST5, DKK1, ARPC1B, CD9, TSHZ1, ELOVL5, KRT18, EREG, NES, FHL1, ARMC9, WDR37, PTGS1, MKX, TSPAN5, ADAMTS1, PTN, ANXA11, EHD3, TMTC1, LUM, BBS7, IGF2R, RPS4Y1, CITED2, WNT5B, GS…
TSENG_IRS1_TARGETS_DN	0.383213	1.51882	0.0023502	0.0877253	135	125	NMB, HLX, CD40, TMEM45A, SFRP2, GJA1, PML, SGCE,TRAF3IP2, RAMP2, SIX1, ZNF394, COL4A1, ADM, COL4A2, TAPBP, MESDC2, CASP2, DENND5A, TGFBI, H6PD, MYL4, MMP14, CDKN2C, DKK3, CRIP2, EBF3, ADARB1, CD63, SPARCL1, NRP1, COL6A1, DIAPH1, COL3A1, TNNT3, PHKA2, LIMCH1, ZFHX3, EPHB6, RSAD2, SESN1, COL6A3, ACTC1, TSPAN31, CTDSP2, CST3, HTRA3, CIRBP, THBD, PPL, ITPR1, CCDC88A, FRMD6, GGT5, RASA4, MRFAP1, AOC3,…
GAUSSMANN_MLL_AF4_FUSION_TARGETS_F_UP	0.368788	1.51894	0.0011186	0.087763	185	171	LHX9, PTP4A3, PLAC9, TMEM173, FBLN7, DYSF, PREX2, IL4R, RCBTB2, LGALS9, GM2A, EMILIN2, FEZ1, LGALS3BP, TGFB3, COL6A2, C1QTNF1, SPRY1, IFI44, OSMR, DKK3, SLC1A3, SSBP4, AHR, WNK2, C1orf54, GJB3, S100A16, LOX, CAST, CX3CL1, PCDHB15, COL6A1, ADAMTSL4, AUTS2, ACTG2, PNRC1, SYNPO, TMEM141, ISG15, ADAMTS4, SCARA3, PSTPIP2, SDF4, EGFR, GAS6, COL3A1, DNASE2, JARID2, PDGFB, ADAMTS2, SLC7A2, SYNM, FAM189B,…
ICHIBA_GRAFT_VERSUS_HOST_DISEASE_35D_UP	0.382979	1.51852	0.0059102	0.0878092	131	120	LGALS3, QSOX1,MARVELD1,TRAF3IP2, SH3GL1, TAPBP, NNMT, SCMH1, LCP2, TMSB10, SHISA5, PROM1, CASP1, PROCR, PLD3, ITGB2, RBM3, TYROBP, IL18BP, RRAS, LAPTM5, TAP1, GRN, CCL5, FCGR1A, IQGAP1, CD52, S100A6, PLD4, PLK1, BIRC5, TSPAN4, SMOC2, SIRPA, S100A11, S100A4, HCK, C1QA, CD68, C1QC, C1QB, SELPLG, CD53, SAMHD1, SLPI, PSMB9, GBP4, NCF4, CTSS, CFP, CYBA, FPR1, CXCL9, MSR1, CD7, CXCL1, NCOA3, CD14, PLAC…
MCBRYAN_PUBERTAL_BREAST_4_5WK_UP	0.352066	1.51898	0.0021716	0.0878457	271	245	PDLIM4, FXYD3, ANO1, STC2, SLC2A1, INHBB, SFXN3, PLA2G7, FBLN7, ALDOC, RPL22, IMPDH2, RPL5, RUNX1, MDK, PTPRK, IKBIP, PLK2, KRT19, HEY1, NXN, SDC1, TGFB3, CDCP1, RPL37A, POF1B, TRMT1, TMEM2, TPBG, MFGE8, SOX9, ADAMTS5, PIAS3, TIMP1, KRT7, PROM1, DKK3, VWF, FN1, CD24, CLDN3, TMED3, RNF128, RPL7, MARCKSL1, EZR, TNFAIP6, MYB, PERP, ABCC3, RPS10, ACTG2, ACTA2, SPINT1, SYNPO, CNN3, DDR1, THBS2, WFDC2,…
PID_NOTCH_PATHWAY	0.438683	1.51908	0.0145889	0.0879005	59	54	CCND1,NOTCH3, DLL4, JAG2, NCSTN,NOTCH4, JAG1, RBPJ, FBXW7,NOTCH1, NCOR2, APH1A, CNTN6,ADAM12, ENO1, DLL1, MAML1,CDKN1A,NOTCH2, MYC,RAB11A, MFAP2, CUL1,ADAM10, APH1B, CBL, YY1, MAML2, MFAP5, CTBP1, MARK2, HDAC1, SKP2, FURIN, EP300, PSEN1,PSENEN, SPEN, MYCBP, RBBP8, MIB1, SKP1, SSPO, KDM1A, CNTN1, LNX1, NUMB, DNM1, DTX1, GATA3, NCOR1, ITCH, EPS15, DNER
STEGER_ADIPOGENESIS_DN	0.505339	1.51797	0.0388489	0.0879612	25	24	PLA2G7, CMTM3, CD44, FSTL1, TIMP2, RNASE4, LOX, THBS2, MMP2, POSTN, MAGED2, WISP1, TIMP3, PDLIM2, RBP1, OSR1, PDPN,RAB3IL1, OGN, CAPN6, PLAT, DPT, WNT5A, OLFML3
FERNANDEZ_BOUND_BY_MYC	0.365305	1.518	0.0056689	0.0880576	182	169	AMD1, GPR4, PKP1, TGFB1, E2F1, HOXD13, RPL22, MCM7, RPL19, HNRNPA1, COL4A1, COL4A2, TGFB2, CHRNB1, RPL27A, BBC3, ITGB1, ISG20, TGFB3, MYBL2, BAX, PTEN, CLDND1, LMNA, RNASEH2A, ELK1, TCIRG1, ARF1, OCA2, ETS2, ATP1A2, HMGN2, CD79B, RPS6, MUC1, UBA52, INSR, RBM3, CD63, PI3, STAT6, EIF4A1, TPM2, RPL13A, MET, PTMA, MSN, CLNS1A, MDM2, FOXM1, BRCA2, ID3, ENO1, SYNGR2, AEBP1, CASP8, ATF4, IRF3, RARA, DKC…
PID_FAK_PATHWAY	0.430119	1.51644	0.0194301	0.0889033	59	57	CCND1, ELMO1, ETS1,MAPK8IP3, SH3GL1, ARHGEF7, ASAP1, ITGB1, ITGA5, NCK2, MMP14, NCK1, ACTN1, FYN, RAC1, RRAS, TLN1, RHOA, PTK2, CRK, KLF8, ITGB5, GIT2, BMX, MAP2K1, PLCG1, JUN, RAPGEF1, SOS1,ARHGAP26, PXN, RAP1B, ROCK2, VCL, RAP1A, PIK3CA, BCAR1, DOCK1, YES1, RASA1, SRC, MAP2K4,ARHGAP35, MAPK9, MAPK1, ITGAV, CAPN2,ARHGEF11, GRB7, PIK3R1, PTPN21, GRB2, RAF1, BRAF, MAPK8, WASL, PAK1
MALONEY_RESPONSE_TO_17AAG_DN	0.401449	1.51528	0.0203304	0.0895774	79	76	RPS8, GJA1, NACA, RPL36AL, PA2G4, RPL30, TPI1, HNRNPA1, PRDX4, RPL27A, GM2A, RBMX, LDHA, RPL24, GNG10, UBE2C, CLDN3, RPL35, RSU1, RPS16, EIF4A1, SYNPO, SNRPB, PTMA, RRM2, PLK1, SNRPE, MAD2L1, SNRPF, CALM2, SSBP1, SUB1, XRCC5, DYNLL1, PTGES3, PDCD5, LTBP1, HNRNPM, YWHAE, ABCE1, HAT1, ZNF43, SRSF3, SRSF2, SMAD5, WRN, HNRNPAB, MARCH6, GNPAT, SRSF7, ARF4, CLTB, VDAC3, CLTA, KPNA2, SSB, TCEB2, PSMA7, …
ALTEMEIER_RESPONSE_TO_LPS_WITH_MECHANICAL_VENTILATION	0.380657	1.51465	0.0105882	0.0899042	128	119	TGM1, SAP30, PLA2G7, TREX1, CASP4, ADM, PLAUR, LCP2, OSMR, TIMP1, ADAM19,MARCKSL1, NARF, IL4I1, IL1R2, CCL20, CSF2RB, ISG15, FCER1G, VCAN, ADAMTS4, OAS3, CCRL2, IRF7, CCL17, FCGR1A, OAS2, SLC15A3, EBI3, FCGR2A, LST1, ITGAM, CMPK2, NFIL3,SERPINE1, RELB, GBP4, BCL2A1, CXCL6, MS4A6A, STAT2, NFKBIA, MAFF, C5AR1, GEM, GPR84, PLEK, TNFAIP3, CXCL1, CSF3R, SLA, CD14, CCL4, MX2, UPP1, CXCL2, MEFV, GPR65, …
WORSCHECH_TUMOR_EVASION_AND_TOLEROGENICITY_UP	0.518574	1.51419	0.0465839	0.0901455	30	22	PIAS2, LCP2, PIAS3, IL4I1,CX3CL1, IRF7,IFNAR1, CCR7, STAT4, CXCL9, IL7R, CCL4, BOK,CXCL10, IL6, IL2RG,VPREB3, XCL1, IFRD1, CCL2, NFKB1, BLNK
BIOCARTA_AGR_PATHWAY	0.474391	1.51373	0.0338505	0.0903821	36	32	LAMA3,CHRNA1, LAMA4, DMD, ITGB1, MAPK3, PAK3, NRG3, RAC1, EGFR, ITGA1, PTK2, SP1, GIT2, UTRN, CTTN, JUN, CDC42, DVL1, PXN, NRG2, DAG1, PAK2, SRC, LAMA2, NRG1, PAK4, MAPK1, CHRM1, PAK6, MAPK8, PAK1
REACTOME_CELL_CYCLE	0.341824	1.51315	0	0.0904124	421	358	CDKN2A, CCND1, RFC2, CCND3, CDT1, LIG1, TUBB4B, CDKN2B, NPM1, B9D2, E2F1, MCM7, ACD, CENPH, CSNK1E, GINS2, UBE2I, RPA1, MCM5, TP53, CENPJ, CDK2, CDC45, MYBL2, TUBA1A, CENPK, LMNA, TYMS, PKMYT1, MAD1L1, NDEL1, RFC5, DSN1, BRCA1, CDKN2C, CDC6, OFD1, UBE2C, MCM10, CCNA1, MCM2, CCND2, TUBB, CEP57, PPP1CC, POLE2, CKS1B, PSMF1, UBA52, KIF20A, CCNB2, RPS27A, LIN37, PLK4, RB1, PSMD10, NDC80, WRAP53, SKA1…
KEGG_REGULATION_OF_ACTIN_CYTOSKELETON	0.362078	1.51277	0.0033482	0.0904539	216	185	FGF11, PDGFD, ITGB4, ITGA4, WASF2, FGF13, ARHGEF7, ITGB1, ITGA5, GSN, ITGA7, BDKRB1, GIT1, MAPK3, PDGFRB, ARPC1A, PAK3, BDKRB2, ARHGEF6, ITGAX, FN1, CSK, PDGFA, LIMK2, ITGA3, PPP1CC, ITGA10, EZR, ACTN1, ITGB2, DIAPH2, PDGFC, CYFIP1, PIP5K1C, DIAPH1, ARPC5, PIK3R5, GNA12, MSN, RAC1, RRAS, EGFR, ITGA1, GNA13, PIP4K2B, PIK3R3, F2R, PDGFB, PIK3CD, RHOA, PIK3CB, IQGAP1, MYH9, ITGAD, ARPC2, PFN1, PTK2,…
REACTOME_EFFECTS_OF_PIP2_HYDROLYSIS	0.52176	1.51327	0.05	0.0904543	25	21	DGKD, DGKA,RASGRP2, PRKCH, ITPR3, TRPC6, DAGLB, MGLL, DGKH, PRKCQ, DGKG, DGKE, DGKI,RASGRP1, TRPC3, DAGLA, DGKB, DGKQ, PRKCD, PRKCE, ITPR2
PATTERSON_DOCETAXEL_RESISTANCE	0.486421	1.51257	0.0445402	0.0904781	29	29	SPAG4, HLA-G, LRRC41, PPM1F,LGALS3BP, ITM2C, IFI16, MYO1D, CCNG2, DDR1, CLU, FNBP1, KDM2A, CPZ, RNF24, PTN, FOXA2, CSAD, ARMCX1, CDKN1C, SLC14A1, LGMN, STAT1, VAMP8, HOXA10, TSPAN1, SULT1C2, GLS, CTSH
KAUFFMANN_DNA_REPLICATION_GENES	0.374082	1.51283	0.0080092	0.0905317	147	138	RFC2, LIG1, POLE3, TREX1, MCM7, NAP1L1, GINS2, RPA1, MCM5, CHAF1A, CDK2,SUV39H1, CDC45, RFC5, BRCA1, NFIX, CDC6, POLL, MCM2,MYBBP1A, SPHAR, BLM, TOPBP1, POLE2, CHAF1B, TNIP1, PTTG1, PAPD7, TYMP, RFC4, CTBP2, MCM6, POLE4, CENPF, DEK, NFIB, RRM2, SUPT5H, CHTF18, TMX1, SET, POLH,CDK2AP1, FEN1,S100A11, CDC7,PPP2R3B, POLA1, ORC1, WDR33, PRIM2, MSH2, RRM1, POLD1, POLG2, RPA2, MCM3, NFIA, SMC4, PTMS, PO…
HENDRICKS_SMARCA4_TARGETS_UP	0.429092	1.51331	0.0202429	0.0905324	56	54	KRT15, LOXL2, FLNB, TPM1, ITGA5, LGALS1, LMNA, MFGE8, ARL4C, ATP2B4, ITGA3, PERP, MAP1B, AHNAK, EMP3, SPOCD1, FBLIM1, DCBLD2, CDKN1A, PLXNB2, ACTN4, HKDC1, FHL2, JUN, KRT18, FADS3, MT1L, TEC, THY1, PHLDB1, IGFBP4, PTPN7, MMP1, PSG9, ABHD2, S100A2, PSG4, AGT, CTSB, AIM1, FOSL2, CCL2, COTL1, MT1H, PSG5,SERPINE2, SMARCA2, EPHB2, SMARCA4, UBE2H, PDP1, IFI30, GADD45A, CTSH
WIERENGA_STAT5A_TARGETS_UP	0.359816	1.51225	0.0056497	0.0905804	217	197	KISS1R, SPAG4, NTSR1, FGF11, PFKFB4, TNFRSF4, KRBA1, IL3RA, HSPA6, IL4R, PLEKHA4, SLC2A14, PGM2L1, PLVAP, ADM, NDRG1, PLEKHH3, ENC1, TRIM46,LINC00341, C3orf58, CTXN1, PLXNA3, CERCAM, MEX3D, DDIT4, FAM129B, ARL4A, SLC2A3, CTSZ, PHLDA1, TRIB3, RNF217, CCND2, STK17B, BATF3, PPFIA4, CALB2, CBS, IL4I1, MUC1, SLC6A9, NAALADL1, COL6A1, NOD1, FNDC3B, RHEBL1, GNG2, CCDC102A, MAP1A, RNF144A, CCL5, EMP1, CD…
SHIPP_DLBCL_VS_FOLLICULAR_LYMPHOMA_UP	0.438202	1.51142	0.0300958	0.0907194	45	44	LGALS3, MCM7, PFKP, IMPDH2, PLOD1, GM2A, P4HB, LDHA, CTSD,HSP90AB1, MELK, ALDOA, SNRPB, THOP1, CCNB1, DLGAP5, MIF, PGAM1, ENO1, HCK, MTHFD2, CENPA, BCL2A1, CDKN3, PSMC1, SAT1, NME1, SLC29A1, TFRC, CCT5, SLC1A5, CLTA, EXOSC7, KPNA2, HMGA1, PSME2, TRAP1,HSP90AA1, IFI30, HSPD1, CCT3, IDH2, ATIC, PRDX1
MEISSNER_NPC_ICP_WITH_H3_UNMETHYLATED	0.556152	1.51166	0.0509745	0.0907706	24	18	LECT1, FOXS1, COL6A2, S1PR4, EPPK1, LYL1,PLEKHG4, ZNF599, SHANK2, PPIH, TSSK3, EVPL, ADAM33, TUBA3C, EPN3, PAK6, PALM3, NCKAP5
JOHNSTONE_PARVB_TARGETS_3_UP	0.341938	1.51149	0	0.0907751	430	410	SPAG4, HLA-G, ECE1, CCND1, AHNAK2, HPCAL1, C19orf33, C15orf39, CD276, LOXL2, FLNB, EHD2, DDOST, PYGL, UNC93B1, SFXN3, FXYD5, SEPT9, SCG2, RNF149, ENO2, VIM, TMEM43, GLTSCR2, GRK5, ITGB4, PTPRE, DPP7, ACLY, CALHM2, KRT19, CMTM3, TOX2, ANXA4, CLIC3, TAPBP, SEMA4B, GSN, LGALS3BP, PRKD2, DVL2, JAG1, CDCP1, RELA, P4HB, ANXA1, SEZ6L2, TGFBI, EPAS1, AGRN, MTA1, DNAH2, DDIT4, MICAL2, OSMR, FAM134C, RNASE…
VALK_AML_CLUSTER_6	0.472301	1.51167	0.0338983	0.0908812	33	31	NT5DC3, RSL1D1, PIEZO2, BST2, PECAM1, FOXF2, RGS10, DSC2, FAM110B, HIGD1A, FTO, DPYSL3, TTC27, CORO1A, SMC4, TUBGCP4,KIAA0930, LTBP1,HLA-DPA1, HLA-DRA, CD74, ADCY2, FAM174B, HOXB3, CEP70, SNCAIP, XPA, PLXNB1, GPC4, FOXC1, CAT
KEGG_CHEMOKINE_SIGNALING_PATHWAY	0.367053	1.51046	0.0022676	0.091163	190	167	CCL18, CCR10, ADCY3, SHC2, ELMO1, GRK5, GNAI2, JAK3, CXCL5, ADCY8,RASGRP2, CXCR4, CXCL16, GNB1, RELA, SHC1, GRK6, MAPK3, GNG10, PREX1, CSK, ADCY7, GNG11, GNB4, GNAI3, CX3CL1, CCL20, LYN, PIK3R5, SHC4, RAC1, AKT1, PF4V1, GNG2, PIK3R3, GNGT1, CCL5, PIK3CD, CCL17, ADCY4, RHOA, PIK3CB, ADCY5, ARRB2, GNB2, CCL28, CCR7, CXCL3, PTK2, FOXO3, CRK, PRKX, CCL13, HCK, NCF1, ROCK1, CCL22, NRAS, RAC2, CRKL, CX…
KIM_WT1_TARGETS_UP	0.356924	1.51062	0.0022497	0.0911686	214	208	KRT17, PTHLH, PDLIM4, CSPG4, SLC7A1, IL1RAP, SFN, LAMB3, ENO2, IL4R, SYDE1, PTPRE, ETS1, ENC1, LBH, MYO1E, IFNGR2, PLAUR, TPBG, CD44, SOX9, CHST3, TM4SF1, ZNF365, ARHGAP29, SH2B3, CDK17, PDGFA, NR3C1, TNFAIP1, SPRED2, ACTN1, PITPNB, NAB1, DAPK3, INHBA, CX3CL1, ZEB1, CCNE2, GRB10, NFATC1, WWTR1, ITPKC, TMC6, ZYX, RCOR1, RND3, LEF1, CBFB, PHLDA2, HPGDS, AREG, MSH6, RARA, BHLHE40, SPHK1, PDE10A, BMP…
CERVERA_SDHB_TARGETS_1_DN	0.468212	1.50976	0.0242857	0.0915003	38	35	NPTX2, FJX1, A1BG, PLA2G7, ALDOC, TTYH1, MMP16, RPL13, PEG10, SH3RF3, LYZ, TMC8, CADPS, ZNF703, ZBTB16, CCR6, SCGN, CPS1, SULT2A1, CHODL, FABP1, SLC39A5, FTCD, F2, ADH6, AFP, HSPA1A, EYA4, ANGPTL3, PEG3,MGC12916, MUM1L1, PPFIBP2, HMGCS2, ITPR2
BOQUEST_STEM_CELL_UP	0.352973	1.50905	0.001087	0.0918598	260	256	ELOVL2, LRRC17, PDGFD, IRS2, CRIP1, FXYD1, IGFBP3, PRR16, TMEM45A, OLFML2B, GALNT12, SGCE, GPNMB, BHLHE41, EFS, SSPN, CELF2, COL5A2, TGFB2, FAP, FEZ1, SERPINA3, EFEMP1, GSN,LINC00341, CRABP2, WISP2, COL6A2, COL5A1, CD44, AXL, SOX9, SLIT3, TIMP1, CDKN2C, TRO, PAMR1, RCN3, ITGBL1, TMED3, FAM129A, COL1A2, ATP1A2, COL1A1, PCOLCE, RNASE4, ADCY7, LOX, TNFAIP6, CTSK, OLFML1, IRS1, PLN, INHBA, COL6A1, RO…
REACTOME_G2_M_CHECKPOINTS	0.450621	1.50829	0.0232558	0.0922224	45	41	RFC2, MCM7, RPA1, MCM5, CDK2, CDC45, RFC5, CDC6, MCM10, MCM2, CCNB2, RFC4, MCM6, CCNB1, WEE1,CDC25C, CDC7, ORC1, RPA2, MCM3, CHEK2, DBF4, RFC3, ORC6, CHEK1, ATRIP, ORC3, MCM4, RAD1, CDK1, ATM, RAD9A,CDC25A, ORC2, RPA3, ORC5, MCM8, HUS1, ATR, RAD17, ORC4
REACTOME_ADHERENS_JUNCTIONS_INTERACTIONS	0.525369	1.50843	0.0399386	0.0922388	27	19	CDH8, CDH5, CDH13, CDH24,CTNNB1, CDH3, CDH4, CDH11, CDH15,CTNNA1, CDH6, CDH1,CTNND1, JUP, PVR, CDH9, CDH12, CADM1, CDH2
NIKOLSKY_BREAST_CANCER_17Q11_Q21_AMPLICON	0.393325	1.508	0.0085995	0.0923144	133	100	CACNB1, PLXDC1, CCL18, STAC2, RPL23A, SARM1, ALDOC, KRT23, RPL19, DUSP14, LASP1, RPL23, GIT1, SMARCE1, CDC6, MYO1D, DHRS13, CASC3,RAPGEFL1, STARD3, PIP4K2B,ANKRD13B, TOP2A, PSMD3, TP53I13, RAB34, CCR7, RARA, SRCIN1, FLOT2, PGAP3, NEK8, PIGS, PCGF2, GSDMA, CWC25, MED24, GJD3, CCL4, TIAF1, NSRP1, PHF12, WIPF2, PROCA1, SUPT6H, BLMH, MRPL45, CPD, MYO18A, MED1, IGFBP4, MSL1, IKZF3, CCL3, CDK12, TMEM98…
KEGG_CHRONIC_MYELOID_LEUKEMIA	0.410102	1.50763	0.0169492	0.0923626	73	72	CDKN2A, CCND1, TGFB1, SHC2, E2F1, RUNX1, TGFB2, TP53, TGFB3, RELA, SHC1, MAPK3, RB1,PIK3R5, CDK6, E2F2, SHC4, AKT1, CTBP2,PIK3R3, MDM2,PIK3CD,PIK3CB, CBLB, CRK,CDKN1A, MYC, NRAS, SMAD4, CDK4, CRKL,MAP2K1, AKT3,NFKBIA, CBL,CDKN1B, HDAC2, ABL1, HRAS, CTBP1, SOS1, IKBKG,TGFBR2, HDAC1, GAB2,MAP2K2,STAT5B,BCL2L1,TGFBR1,PIK3CG, BAD,PIK3CA,PIK3R2, E2F3, NFKB1, KRAS, MAPK1, IKBKB, SMAD3, ARAF, SOS2, AKT2…
KEGG_GAP_JUNCTION	0.402853	1.50765	0.022756	0.0924615	90	82	PDGFD, TUBB4B,GUCY1B3, ADCY3, GJA1, GNAI2, ADCY8,GUCY1A3, TUBA1A, TUBB6, ITPR3, MAPK3, PDGFRB, PDGFA, TUBA1B, TUBB, ADCY7, GNAI3, PRKG1, PDGFC,GUCY1A2, EGFR, MAPK7, PDGFB, TUBB3, ADCY4, ADCY5, MAP2K5, PRKX, NRAS, PRKACA, MAP2K1, ITPR1, GNAS, GNAQ, PLCB3, HRAS, PLCB1, SOS1, TJP1, PLCB2, ADCY6, PLCB4, MAP2K2, TUBA3D, CSNK1D, HTR2B, TUBA1C, ADCY1, TUBA3E, ADCY2, CDK1, LPAR1, GNAI1, TUBA3C, SRC, DRD1…
GARGALOVIC_RESPONSE_TO_OXIDIZED_PHOSPHOLIPIDS_BLACK_UP	0.471599	1.50583	0.0245665	0.0932833	35	34	LOC284023, SPRY4, DUSP14, RGMB, ZNF654, TRIB3, CD55, PLAGL1, AKIRIN2, CDKN1A, LATS2, ETV5, EIF1, OSGIN2, KLF2, MOB2, F2RL2, ERRFI1, RHPN2, CDC42EP2, CCDC82, SQLE, PRNP, ATP11B, CLK1, ABHD4, SRC, SNX16, ZNF44, TFEC, CCDC93, GCH1, UBB, NFE2L2
LOPEZ_TRANSLATION_VIA_FN1_SIGNALING	0.46426	1.50588	0.0325926	0.0933534	35	34	EIF3D, MMP16, EFNB2, SNRPD1, DAPK3, PTMA, IMP3,ARHGDIA, GTF2F1, PTBP1, PDE3A, STX16, ILF3, CALD1, MCL1, DYRK1A, TGFBR2, SOX4, TRIO,ZFP36L2, ANP32A, HOXB7,RANBP10, SSTR2, PPP5C,SH3GLB2, EIF5B, THBS1, HOMER3, SRPK2, RBM25, SOCS2, RALBP1, TNPO3
FIGUEROA_AML_METHYLATION_CLUSTER_7_UP	0.391074	1.50603	0.0160494	0.093367	118	94	KRT81, COL21A1, TGFB1I1, GUCY1B3, SAP30BP, CNTROB, IFNAR2, PIAS2, CCDC85A, ZNF667, BTBD3, CASP2, TUBB6, DBNDD2, MYL4, MAD1L1, TANC2, NRP2, VWF, FSTL1, HNRNPD, EDEM1, KDM5B, NNAT, CANT1, ZNF84, AEBP1, MAP7D3, MPZL1, OAZ3,ARHGAP27, CHMP4C,SLC39A14, FAM131A, MYO7A, SCG5, PIGZ, TRAPPC1, MRPL9, N4BP1, RIMKLB, ZNF174, EXOSC3, CCDC34, MORF4L1, CCDC96, OSBPL1A, SLC8A3, SPOP, BTAF1, POU2AF1, TLR2, SNRNP70…
KEGG_GLYCOLYSIS_GLUCONEOGENESIS	-0.368206	-1.55839	0.0201613	0.0936231	62	54	HK2, ALDOC, ENO2, PFKP, TPI1, GAPDH, LDHA, PGK1, ALDOA, PGAM1, ENO1, GPI,ALDH3B1, PGM1, PGM2, HK1, HK3, PFKL, PGAM4, GCK, G6PC, ADH6, PKLR,ALDH1A3, ADH1A, LDHC,ALDH1B1, ALDOB, AKR1A1, PCK2, ADH1B, ADH1C, PGAM2, ALDH2, PFKM,ALDH3A1,ALDH7A1,ALDH3B2, ACSS2, ADH4, PCK1, ADH5, BPGM, ACSS1, DLAT, FBP1,ALDH3A2, PDHB, LDHB, GALM, ENO3, PDHA1,ALDH9A1, DLD
BAELDE_DIABETIC_NEPHROPATHY_UP	0.400664	1.505	0.0154242	0.0937045	86	77	CCND1, CRIP1, MT3, PTPRM, PPM1F, RAMP2, UNC5B, ACVRL1, PECAM1, GDPD5, NOTCH4, CD34, BAX,ARHGEF15, ICAM2, CD24, GAS2L1, ENG, TIE1, FAM53B, CLU, EML1, GAS6, INPP5K, ENO1, ITM2A, IGFBP5, TLE2, RBPMS, SEMA6A, MYC, HYAL2, PPP3CC, LYZ, SLCO2A1, VAT1, PTPRB, MAP4, ZCCHC24, CLEC3B, HBB, PTGIS,ADAMTSL2, CCL3, PDE2A, ID1, ATP10B, MT2A, SPG7, STARD8, LTK, SLC22A6, CYP4F2, CAPN3, CRHBP, FTL, DPEP1, IMPA2, AC…
SHIN_B_CELL_LYMPHOMA_CLUSTER_3	0.496796	1.50502	0.0372093	0.0937991	28	27	CCND1, CCND3, TGFB1, NFATC1, ZEB2,TNFRSF1A, HHEX, CD86, BCL2, FZD1, NFKB2, FGR, CXCR6, ID2, CXCL13, MAF, LFNG, LTB, LRMP, IL18, CBX5, LCK, NFKB1, WNT5A, TNFSF13, CADM1, JAK2
NAGASHIMA_NRG1_SIGNALING_DN	0.430608	1.5041	0.0278164	0.0941344	58	51	GPR87, PTHLH, ZNF248, SMYD2, MID1, MPZL2, PTPRF, DDIT4, CD44, ZNF222, PPP1R3C, RYBP, ZKSCAN4, ZNF292, ZNF362, FRAT2, TTLL5, ETAA1, ARL14, MAFB, NUMA1, OSR2, PDS5B, RBM15, TCHH, TSC22D2, PGAP1, N4BP2L2, ZNF287, F3, APC,KIAA0430, PPP1R3D, B3GNT2, CDC14A, THBS1, CROCCP2, TIA1, PIP5K1A, PCDHGA8, FUT9, MBD4, SOCS2, GALK2, RALGPS2, AKAP9, GPLD1, DMXL2, HMGCS1, PEX3, ANK3
OLSSON_E2F3_TARGETS_DN	0.443361	1.50413	0.030303	0.0942253	49	45	EDN1, VIM, CAV2, MYBL2, IGF2, UBE2C, KIAA0101, INHBA, PTTG1, PTMA, TPX2, CCNA2, RRM2, HMGB2, PLK1, BAIAP2L1, MAD2L1, KRT80, THBD, CD9, NFKBIA, CXCL1, PCNA, TIMP3, NUCKS1,HIST1H2BJ, FST, HIST1H1C, MAL2, CDK1, TMPO, LBR, THBS1, MAGED1, HIST1H3D, E2F3, HIST3H2A, MT1H, MT1F, HIST1H3E, USP32, LPL, MT1X,HIST1H2BN, TAF6L
ABRAHAM_ALPC_VS_MULTIPLE_MYELOMA_UP	0.494968	1.50375	0.0467572	0.0942576	26	26	CCND1, IGFBP3, CD44, PDGFRB, RB1, FAS, BCL6, IGFBP5, A2M, RUNX2, RARA,TNFRSF1A, CDKN1B, JUN, APP, CD36, FGFR1, HMOX1,SERPINA1, MAPK12, NFKB1, APOE, CDC25B, DCN, BTRC, CXCL12
LIAN_LIPA_TARGETS_6M	0.417003	1.50321	0.0298314	0.0945541	74	63	FABP7, PLA2G7, TREM2, GPNMB, SLC37A2, IL1R2, STEAP4, FCGR3A, XIST, FCER1G, MMP19, SLC11A1, MMP13, SLC15A3, ADAM8, MS4A7, FCGR2A, C1QA, CD68, C1QC, C1QB, FCGR2B, MARCO, CD84, RGS1, CFP, UTRN, C3AR1, IGSF6, MSR1, LY9, DNMT3A, CXCL2, MPEG1, GALC, CD244, TLR7, MMP12, MAFB, FCN1, SEMA7A, S100A9, CD5L, HMOX1, CXCR2, CCR1, FKBP5, ACP5, CLEC4E, CTSB, MYO5A, DST, TNFAIP2, KIF1A, RP1, SNX6, NEU1, SLC40A1, …
LIU_PROSTATE_CANCER_UP	-0.334139	-1.55536	0	0.0949845	96	87	PTP4A3, NLE1, TP53, OR51E2, GUCY1A3, SOX9, ELK1, TSPAN13,MARCKSL1, RPL22L1, ATF6B, GALNT7, CCNG2,PPP1R14B, EIF4A1, CANT1, RAB3D, CAMKK2, PPP3CA, MTHFD2, LRIG1, CALR, BZW2, ST14, FARP1, PDLIM5, SEL1L, SOX4,TP53INP1, GOLM1, APRT, PYCR1, BCAM,ARHGEF26, CREB3L1, VSTM2L, SLC35B2, RNF41, PDIA5, SERP1, SLC19A1, PTRHD1, DNAH5, TARP,HIST3H2A, ENTPD6, MAP2K6, ALDH1A3, EPCAM,TMEM161A, SH3RF1, GLYATL1, SLC43…
HUTTMANN_B_CLL_POOR_SURVIVAL_UP	0.352563	1.50236	0.0010787	0.0950606	276	250	NMB, SPAG4, HLA-G, EGLN3, HPCAL1, CRIP1, ATP11A, MAN1B1, TMEM45A, SEPT9, SLC16A3, PHEX, DMD, ANGPT2, ITGA4, HNRNPUL1, SF3A2, HOMER2, GM2A, CLEC2B, MEF2D, ARID5A, ANXA1, PRKCSH, TLE1, IFI44, EFHC2, DCAF15, MAD1L1, TIMP1, MYO9B, EHBP1L1, PBXIP1, PEA15, RIN3, FAM89B, DPYSL2, OGFR, SPRED2,ST6GALNAC4, RNASE4, CDC37, MYB, DAPK3, LDOC1, TYROBP, LILRB4, DIAPH1, FCER1G, MED15, GRN, TSPO, LAMA5, CHST12, AR…
LEE_NAIVE_T_LYMPHOCYTE	0.548033	1.50165	0.0507937	0.0953488	19	17	VSIG1, GIMAP5, INPP4B, GIMAP8,C1orf162, EPPK1, TAGAP, UPP1, PASK, FAM159A, IL6R, ATP10A, RPS4Y1, NOG, AK5, PLEKHA1, LDLRAP1
BENPORATH_PROLIFERATION	0.366678	1.50147	0.0081871	0.0953635	147	137	CDT1, A1BG, DTL, CDCA7, ANLN, RIT1, RAD51, DIEXF, MYBL2, PRC1, TYMS, TMSB10, PKMYT1, FANCE, ARF1, MCM2, NCAPG, PURB, CKS1B, SNRPD1, GNB4, CCNB2, CHAF1B, NDC80, PTTG1, RFC4, H2AFZ, GINS3, EXO1, ATAD2, RBM8A, TTK, CENPM, MND1, CENPF, DEK, RRM2, TOP2A, ASPM, CNIH4, PBK, A2M, NFE2L3, CDCA5, SMAD2, RANBP1, BIRC5, NUF2, SHFM1, EZH2, S100A11, BUB1, NEK2, MAD2L1, NMI, MARCO, CENPA, RAD54L, PRIM2, FAM3C, …
BIOCARTA_ERK_PATHWAY	0.488662	1.50174	0.0520059	0.0953994	28	28	NGF, PTPRR, NGFR, ITGB1, GNB1, SHC1, MAPK3, ELK1, EGFR, GNGT1, MKNK1, MYC, IGF1R, MAP2K1, GNAS, HRAS, SOS1, STAT3, MAP2K2,RPS6KA5, SRC, MAPK1, PPP2CA, MKNK2,RPS6KA1, PDGFRA, GRB2, RAF1
FIGUEROA_AML_METHYLATION_CLUSTER_3_UP	0.368779	1.50094	0.0117647	0.0954803	170	138	KRT81, COL21A1, POU5F1, KRTCAP3, PCDHB10, PCDHB9, GUCY1B3, SAP30BP, EXOSC2, CNTROB, UHRF1, PIAS2, ZNF662, ZNF667, BTBD3, CASP2, TUBB6, PCDHB16, MYL4, MAD1L1, TANC2, NRP2, ZBTB45, NFIX, VWF, FSTL1, HNRNPD, LEMD2, ZFP28, AMOTL1, PCDHGB7, TIE1, MSRB3, NNAT, CANT1, ZNF84, PCDHB8, ZNF264, MAP7D3, PCDHB14, ARHGAP44, SLC39A14,TNFAIP8L2, PCDHGA11, OXA1L, ZNF343, SCG5, C3orf38, YTHDF2, PIGZ, TRAPPC1, EREG…
YAGI_AML_WITH_INV_16_TRANSLOCATION	0.338889	1.50096	0.0010352	0.0955759	422	384	PTHLH, ELOVL2, DGKD, HLX, KCNS1, PKP3, MED6, HSPA6, RPL23A, VIM, DMD, PFKP, PTPRE, TRAF5, NACA, CASP4, RPL19, COL5A2, RUNX1, RPL32, LGALS9, CSNK1E, MTUS2, RPL27A, RPS4X, HOMER2, ARHGEF7, CYTH1, PABPC1, FLT1, UBC, RPL37, TSHR, NCK2, RPL31, PMP22, RBM15B, ARID5A, ERG, RPL37A, PRKCH, RHBDF1, SPARC, RPS18, RPL13, DPY19L1, RPL34, RPLP2, GBP2, IDS, TMSB10, STK10, OSMR, VPS72, TOR1B, SLC38A10, SFTPD, PO…
ACOSTA_PROLIFERATION_INDEPENDENT_MYC_TARGETS_DN	0.383411	1.50059	0.0142349	0.0956046	116	104	TRPV2, FDXR, RIT1, MCAM,SERPINH1, HEY1, TNNT1, LASP1, SHC1, LCP2, ARL4A, CLEC11A, SLC2A3, CTSD, RHOG, SEC14L1, SIDT2, CHPF2, CD63, SEC24D, ARHGEF2,ADAMTSL4, HOXD1, NAGA, ST3GAL2, LYL1, CHST12, SH3BP1, GTF2F1, CBFA2T3, CAP1, USP11, ADAM8, TNFAIP8, S100A11, AMPD3, MYC, ESYT1, RAB13, CAPN1, RAC2, KLF6, MCL1, KRT8, SLC10A3, TAX1BP3, KRT18, FADS1, SHANK2, C10orf2, ITFG2, HBB, SNCG, CARD9, MPP1, SLCO2B…
LANDIS_ERBB2_BREAST_TUMORS_324_DN	-0.304426	-1.55321	0	0.0958494	149	141	CRIP1, PRKCDBP, GJA1, SLC27A1, TMEM43, KRT19, COL4A1, CD34, TGFBI, COL5A1, H6PD, MFNG, VWF, FSTL1, COL1A1, MARCKS, NRP1, COL6A1, ACTA2, COL18A1, HEPH, LYL1, AHNAK, GAS6, COL3A1, CD151, BNIP2, S100A6, RAB34, SQRDL, MYL9, DERL1, KLF4, POSTN, COL6A3, SRPX, ANGPTL2, CCDC80, PGM1, NDUFS5, HTRA1,EIF4EBP1, THBD, FZD4, CFP, PTPRB, CDC34, SEC23A, MAP4, FADS1, SNRK, CD36, MRC1, PLAC8, CLEC3B, YWHAG, SDPR, …
HAN_SATB1_TARGETS_DN	0.33873	1.50008	0.0010256	0.095894	442	417	KRT81, SPAG4, NOL3, LAMB2, P4HA1, CD40, SFN, TMEM45A, SLC17A9, SFXN3, RASGRF1, GPNMB, ALDOC, ENO2, HRH1, BST2, GRK5, INSIG2, MCAM, JAK3, PTPRE, CASP4, RPS6KA2, HNRNPA1, SERPINH1, ADM, TPM1, TGFB2, NDRG1, PXDN, VLDLR, MPZL2, NNMT, FLT1, ISG20, PTPRF, EFEMP1, PMP22, RARG, NCAPH2, CD34, TGFBI, EPAS1, APOC1, COL6A2, TMEM2, SLC16A1, RPL23, FKBP1A, TMSB15B, CTNNB1, DDIT4, APOL2, CSPG5, GALNT1, ATG7, OS…
ZUCCHI_METASTASIS_DN	0.454251	1.4998	0.047486	0.0959753	44	41	LGALS3, SEPT9, PDLIM1, ANXA1, TM4SF1, KRT7, CCL20, EIF4A1, PNRC1, ZYX, RHOA, PFN1, CXCL3, AREG, EIF3G, EIF1, CST3, CXCL6,TACSTD2, STRN4, NFKBIA, HMGN1, CXCL1, SAT1, CXCL2, LIF, PDCD5, CLDN4, YWHAE, PPM1G, JUND, DDX5, SEC61B, BAP1, SEMA3B,CDK2AP2,SCGB1D2, DDB1,GADD45B, RASD1,TRAPPC4
VALK_AML_CLUSTER_13	0.496377	1.49934	0.0520059	0.0962041	30	26	C15orf39, KDM4B, GRK5, ITGB4, VLDLR, CAV1, HSPG2, ADCY7, ROBO1, VOPP1, LAT2, LCP1, RUNX1T1, PSD3, NCALD,C11orf21, POU4F1, SLC25A1, NARFL, NBL1, STK32B, BAIAP3, ADRA2C, FBLN5,CACNA2D2, THSD7A
SANA_RESPONSE_TO_IFNG_DN	0.393796	1.49892	0.0202788	0.0963744	85	81	SMYD2, RPL10A, GJA1, ARHGDIB, RPL6, ESM1, ANXA2, NT5DC2, PA2G4, APEX1, FAM198B, SSR2, CD34,TNFRSF10D, APLN, MICAL2, PRSS23, KRT7, VWF, PEA15, RPLP0, HSP90AB1, ANTXR1, INHBA, H2AFZ, TPX2, RPSA, YWHAQ, RPS3A, PRMT1, SNRPD2, CCT4, TXNDC5, RGS4, PON2, ANGPTL2, XAB2, TPT1, DKK1, HDAC2, FABP5, NME1, EI24, MORF4L2, RHOC, KDELR2, CCNB1IP1, TFRC, FGFR1, RAN, POLD2, PRCP, PIM3, EIF4G2, MGST3, CCT5, COTL1, …
PID_ATR_PATHWAY	0.454572	1.49866	0.0294944	0.0964535	39	39	RFC2, MCM7, RPA1, RAD51, CDK2, CLSPN, RFC5, CDC6, MCM2, TOPBP1, RFC4, MDM2, BRCA2, CCNA2, CDC25C, PLK1,SMARCAL1, CEP164, YWHAZ, RPA2, PPP2R1A, RFC3, FANCD2, CHEK1, ATRIP, NBN, TIPIN, RAD1, RAD9A, SSPO, CDC25A, PPP2CA, YWHAB, HUS1,TIMELESS, FBXW11, ATR, PPP2R2B, RAD17
REACTOME_STRIATED_MUSCLE_CONTRACTION	0.512324	1.49806	0.0377074	0.096765	27	21	VIM, DMD, TPM1, TNNI2, TNNT1, MYL4, TPM3, TPM2, TPM4, MYH3, TMOD1, DES, MYL3,MYBPC2, TCAP, TNNT2, TNNI1, TNNC1, NEB, MYH8, ACTN2
DELASERNA_MYOD_TARGETS_UP	0.401633	1.49748	0.0193798	0.0967981	89	77	CCND3, CHRNA1, DYSF, RUNX1, CHRNB1, TNNI2, HRC, VKORC1, MYL4, PRSS23, PACS2, PBXIP1, IGF2, PLEKHO1, STK17B, PPFIA4, GYS1, RB1, KLF5, FCER1G, LRP4, TMCC3, PDLIM3, TNNT3, RHOB, BCL6, IGFBP5, PRND, MEF2A, CDKN1A, HS2ST1, KLHDC10, MYH3, DMPK, PSMC3, LMNB2, KIF5C, SCHIP1, HSPB8, ANXA11, TFRC, C4orf32, DBN1, SCRIB, CPSF6, KLHL5,FLJ37453, ANKS1B, HIP1, SH2B1, HDAC11, CD82, ATP2A1,CACNA2D1, PVR, AGPAT5, …
REACTOME_G_PROTEIN_ACTIVATION	0.527855	1.49762	0.0518293	0.0968168	27	20	GNAI2, GNB1,GNG10,GNG11, GNB4,GNAI3, GNG2,GNGT1, GNB2, GNB3,GNGT2,GNAI1, GNG5,GNG12, POMC,GNAO1, GNG7, GNG4, GNAZ, GNB5
NGUYEN_NOTCH1_TARGETS_UP	0.488486	1.49775	0.0478261	0.0968657	29	28	PTHLH, LAMB2, SLC4A3, BRCA1, PSMD10,COL18A1, PHB2, FLOT1, F2R, CD4, TAGLN,ARL6IP5, CANX, PCF11, HDAC1,SLC12A3, ANXA6, RBP1,S100A13, TCAP, CNTN1, ITGAV, SFPQ, NQO1, HMGCR, SEC62, SLC3A1, STAT5A
[truncated: 2,552 more rows]

## Sheet: CCPAPvsCCRCC_Hallmarks
	es	nes	pval	fdr	gene_set_size	matched_size	genes
[truncated: 50 more rows]

[truncated: 1 more sheets: CCPAPvsCCRCC_C2]
