# Supplementary material for: Abnormal oxidative metabolism in a quiet genomic background underlies clear cell papillary renal cell carcinoma
Source: eLife. 2019 Apr 1;8:e38986. doi: 10.7554/eLife.38986 (PMC6459676; doi:10.7554/eLife.38986)
Supplement: Figure 5—source data 1. [file elife-38986-fig5-data1.xlsx]

## Sheet: MT-CO1
	H.FOR.MTCO1	dx	Subtypes
1	231.142	chromophobe, classic	chRCC (n=4)
2	214.8	chromophobe, classic	chRCC (n=4)
3	66.29	chromophobe, classic	chRCC (n=4)
4	298.786	chromophobe, eosinophilic	chRCC (n=4)
5	32.14	clear cell pap	CCPAP (n=11)
6	0.1	clear cell pap	CCPAP (n=11)
7	0.88	clear cell pap	CCPAP (n=11)
8	34.39	clear cell pap	CCPAP (n=11)
9	25.42	clear cell pap	CCPAP (n=11)
10	45.14	clear cell pap	CCPAP (n=11)
11	86.97	clear cell pap	CCPAP (n=11)
12	26.59	clear cell pap	CCPAP (n=11)
13	10.2	clear cell pap	CCPAP (n=11)
14	89.52	clear cell pap	CCPAP (n=11)
15	24.93	clear cell pap	CCPAP (n=11)
16	94.14	clear cell RCC	ccRCC (n=7)
17	76.53	clear cell RCC	ccRCC (n=7)
18	16.2	clear cell RCC	ccRCC (n=7)
19	152.15	clear cell RCC	ccRCC (n=7)
20	109.1	clear cell RCC	ccRCC (n=7)
21	153.76	clear cell RCC	ccRCC (n=7)
22	99.94	clear cell RCC	ccRCC (n=7)
23	228.507	oncocytoma	Unclassified/ONC (n=4)
24	266.8	oncocytoma	Unclassified/ONC (n=4)
25	281.61	unclassified, eosinophilic	Unclassified/ONC (n=4)
26	303.24	unclassified, eosinophilic low grade	Unclassified/ONC (n=4)
27	245.06	papillary type 1	pRCC (n=2)
28	182.19	papillary type 1	pRCC (n=2)
29	78.88	TCEB1	TCEB1 (n=2)
30	74.36	TCEB1	TCEB1 (n=2)

## Sheet: 8-oxo-dG
	H.FOR.MTCO1	dx	Subtypes
1	3.34	clear cell pap	CCPAP (n=14)
2	17.88	clear cell pap	CCPAP (n=14)
3	42.74	clear cell pap	CCPAP (n=14)
4	45.74	clear cell pap	CCPAP (n=14)
5	62.91	clear cell pap	CCPAP (n=14)
6	66.75	clear cell pap	CCPAP (n=14)
7	76.72	clear cell pap	CCPAP (n=14)
8	76.92	clear cell pap	CCPAP (n=14)
9	112.77	clear cell pap	CCPAP (n=14)
10	209.57	clear cell pap	CCPAP (n=14)
11	228.91	clear cell pap	CCPAP (n=14)
12	318.89	clear cell pap	CCPAP (n=14)
13	325.08	clear cell pap	CCPAP (n=14)
14	376.51	clear cell pap	CCPAP (n=14)
15	8.27	clear cell RCC	ccRCC (n=3)
16	59.52	clear cell RCC	ccRCC (n=3)
17	143.74	clear cell RCC	ccRCC (n=3)
18	106.78	oncocytoma	Unclassified/ONC (n=2)
19	41.67	oncocytoma	Unclassified/ONC (n=2)
20	37.63	papillary type 1	pRCC (n=3)
21	45.98	papillary type 1	pRCC (n=3)
22	128.85	papillary type 1	pRCC (n=3)
