# Supplementary material for: Abnormal oxidative metabolism in a quiet genomic background underlies clear cell papillary renal cell carcinoma
Source: eLife journal article supplement (doi:10.7554/elife.38986), 2019-03-29

RC13 All Data

PC2: 19% variance explained

PC1: 37.2% variance explained

type ● CCPAP ● CCRCC ● CCRCC tumor, high-sorbitol

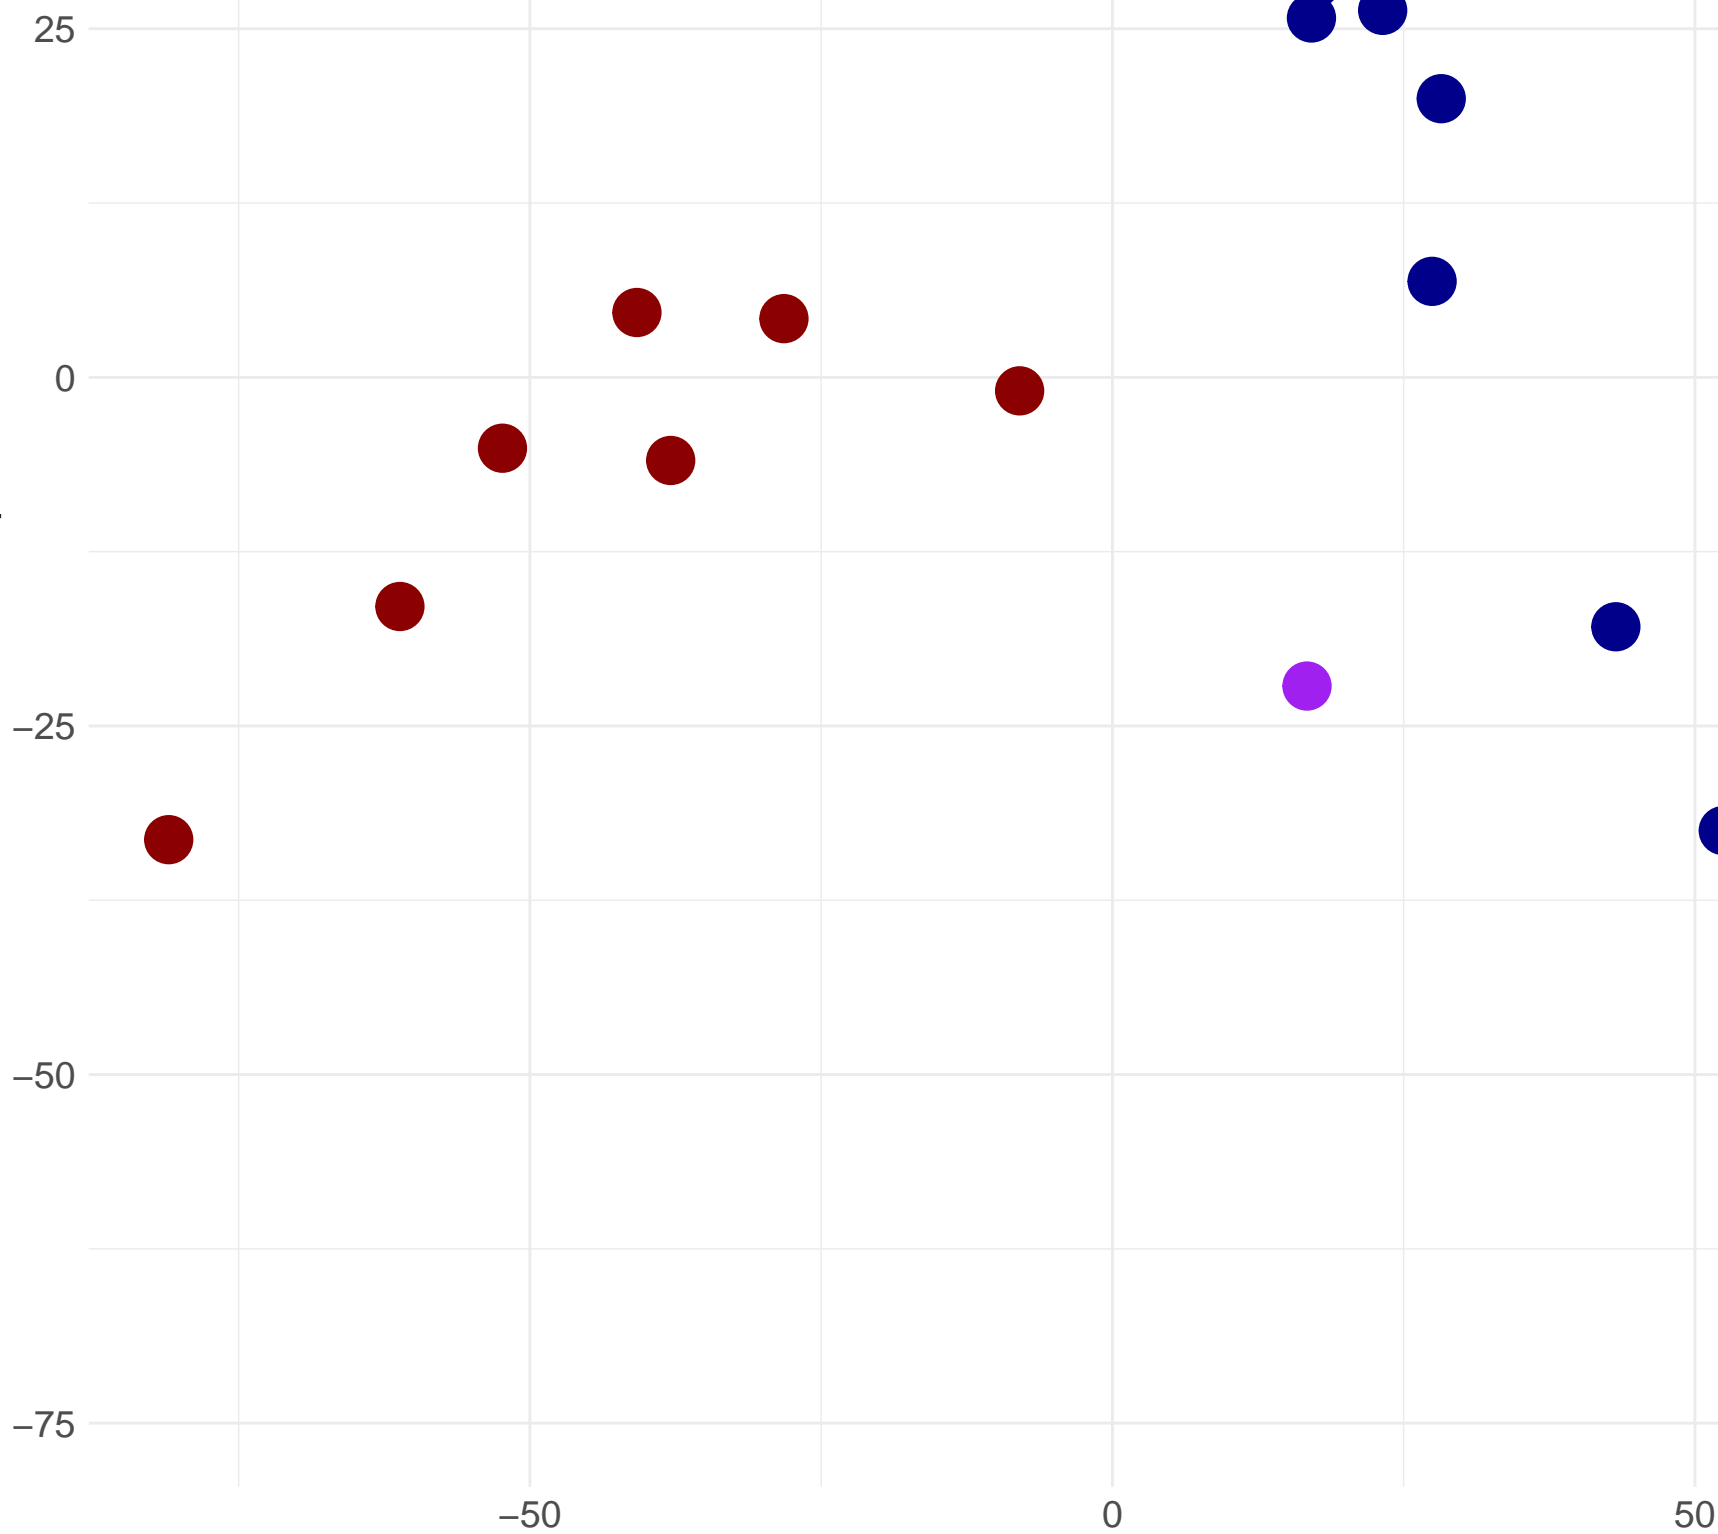

Supplement: supp [file elife-38986-supp-v2.zip]
