# Supplementary figures and images for: Abnormal oxidative metabolism in a quiet genomic background underlies clear cell papillary renal cell carcinoma
Source: eLife journal article supplement (doi:10.7554/elife.38986), 2019-03-29

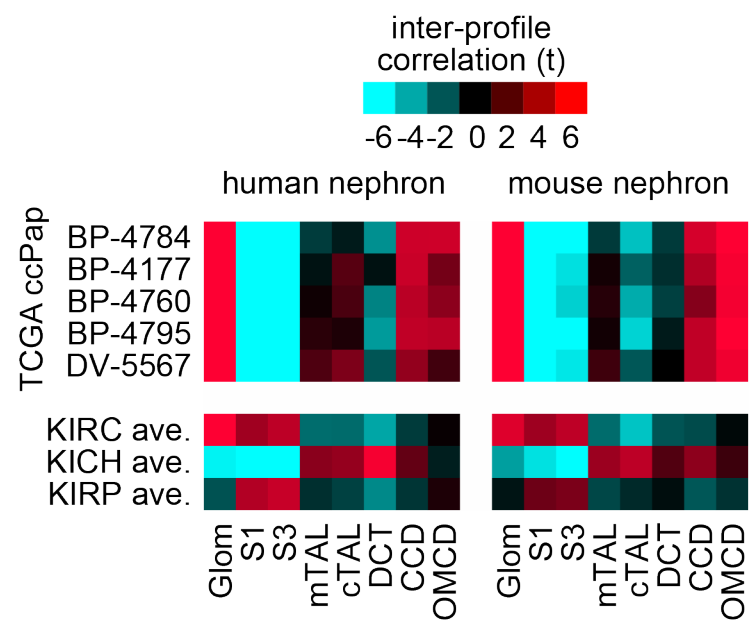

Supplement: supp [file elife-38986-supp-v2.zip]

A

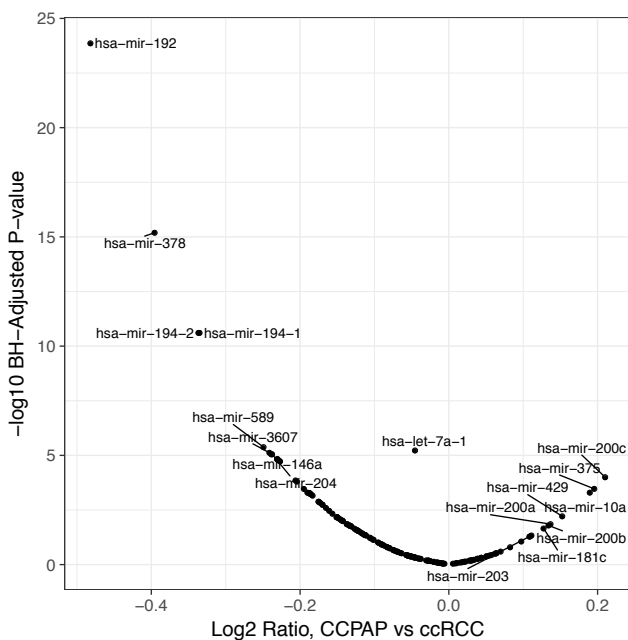

B

KIRC (59577 probes)

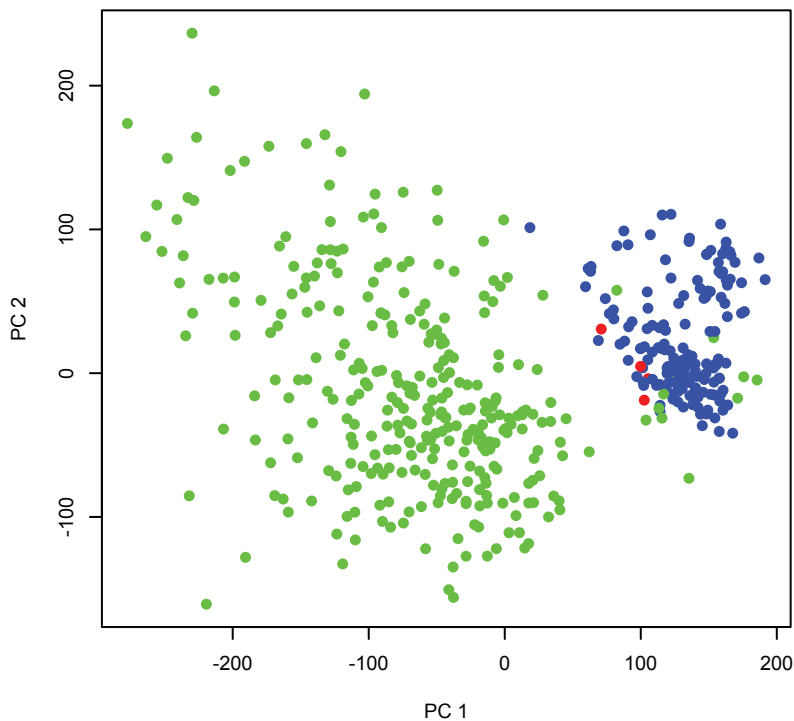

Supplement: supp [file elife-38986-supp-v2.zip]

A

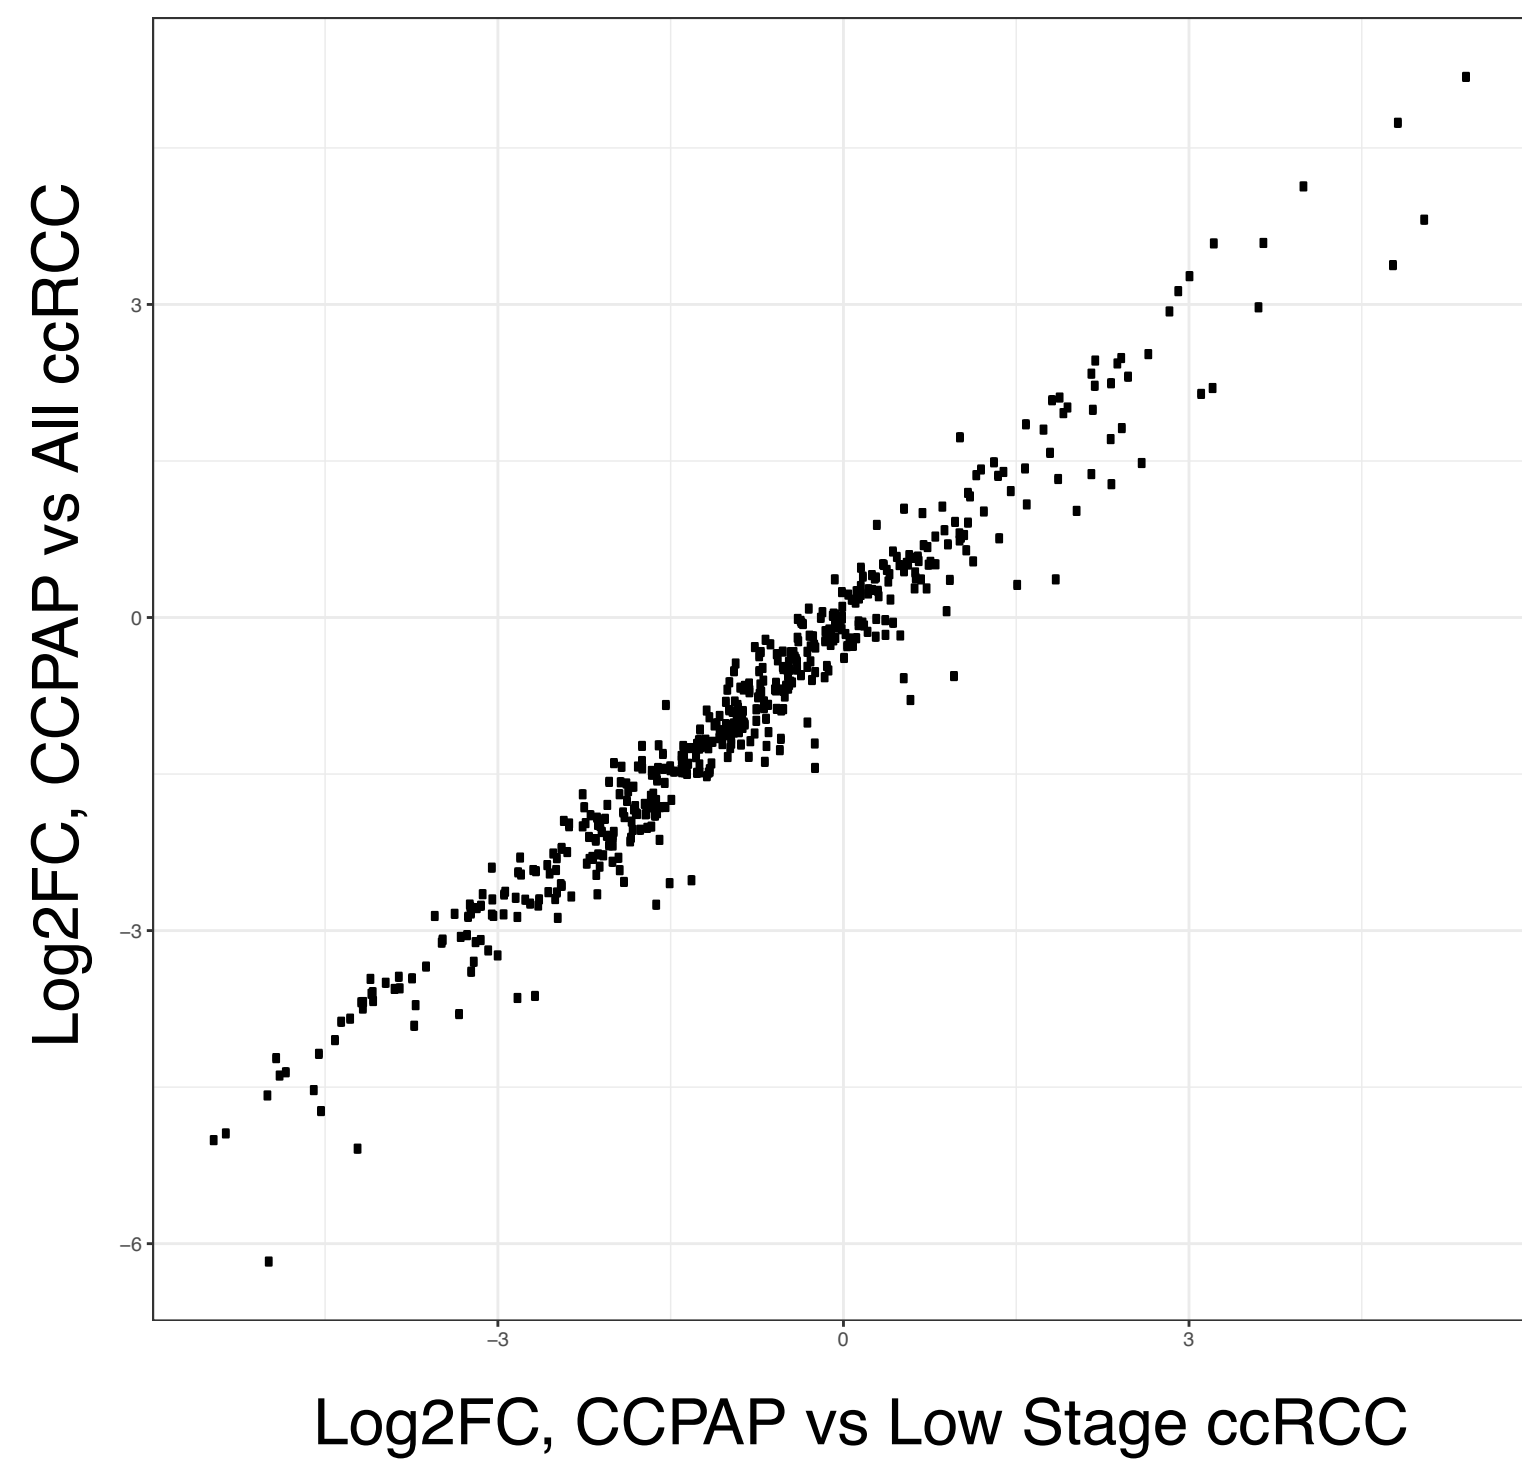

B

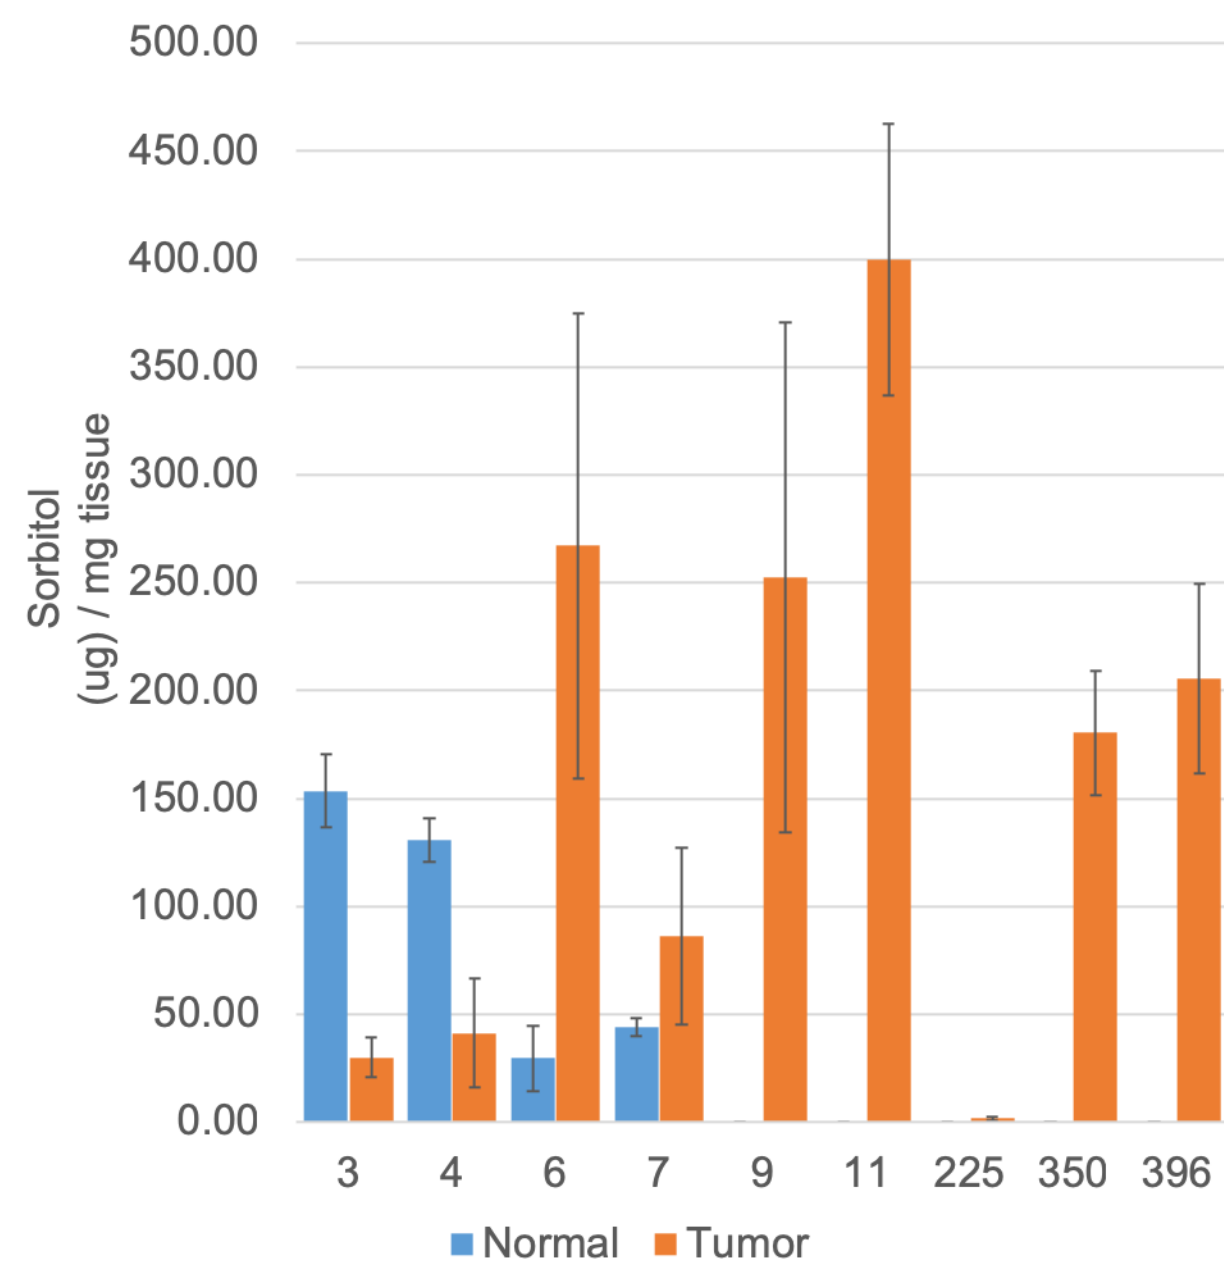

C

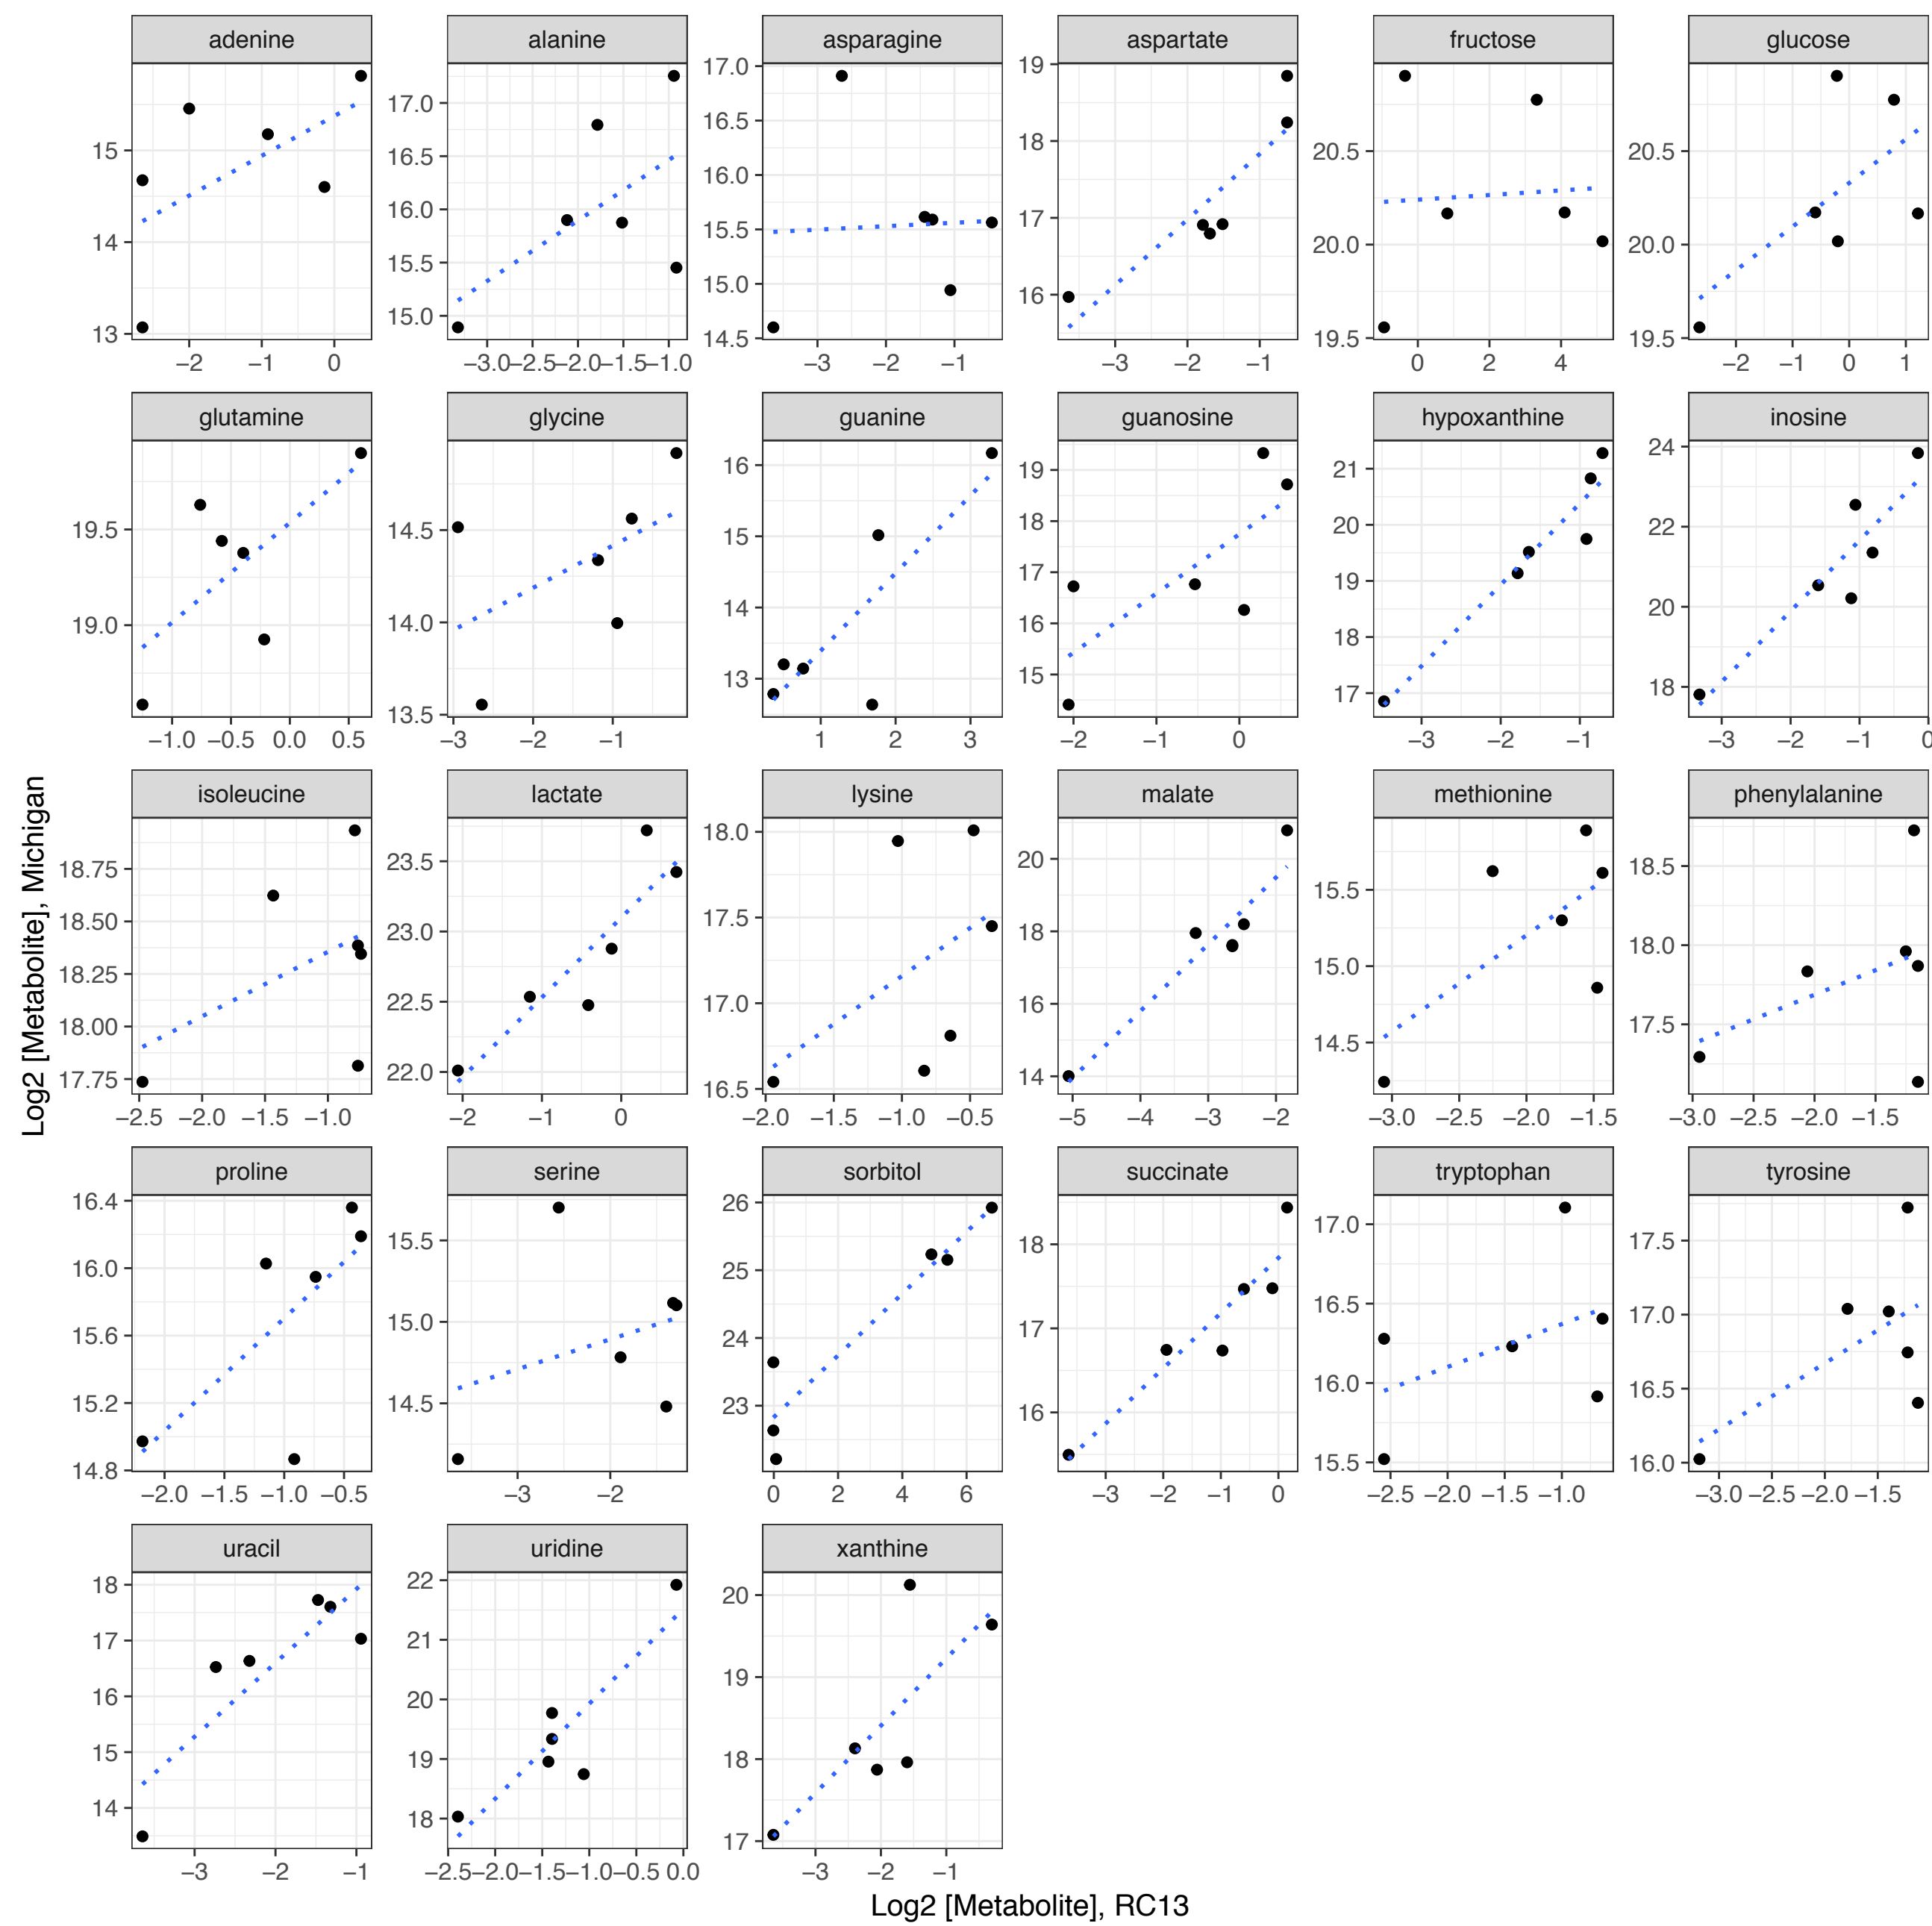

Supplement: supp [file elife-38986-supp-v2.zip]

A

852 Total Mitochondrial Genes from  
GO Geneset with >16 reads/sample

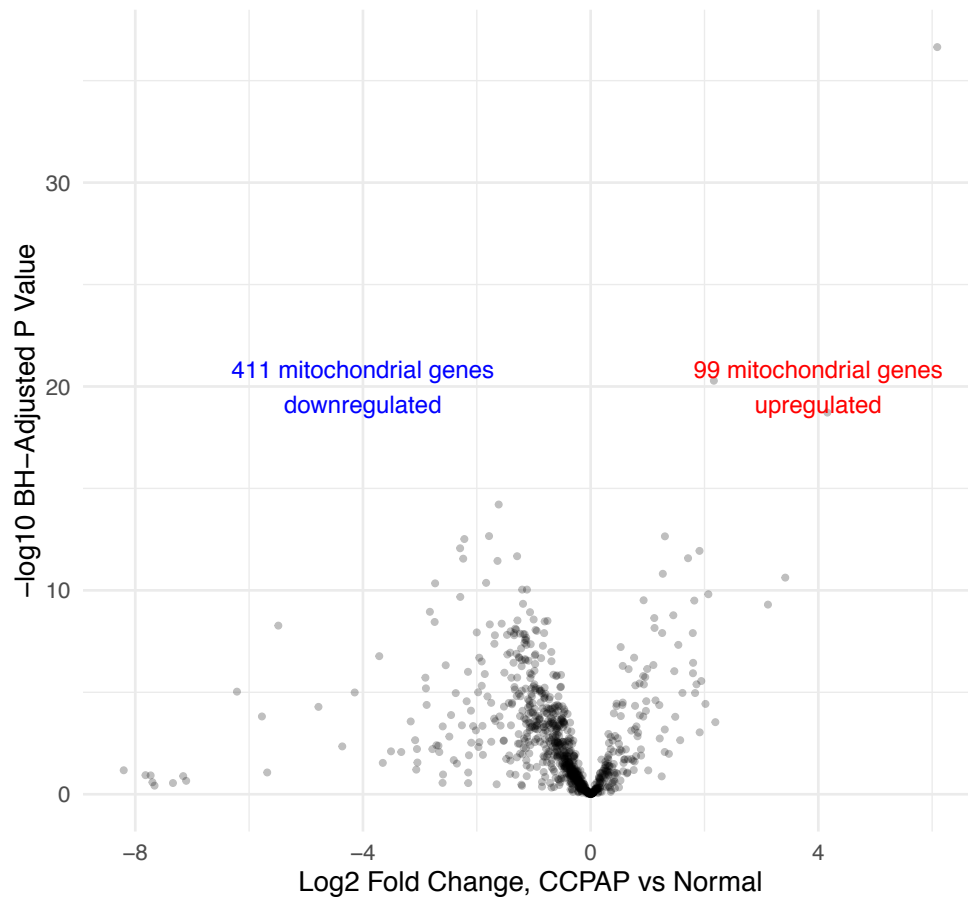

B

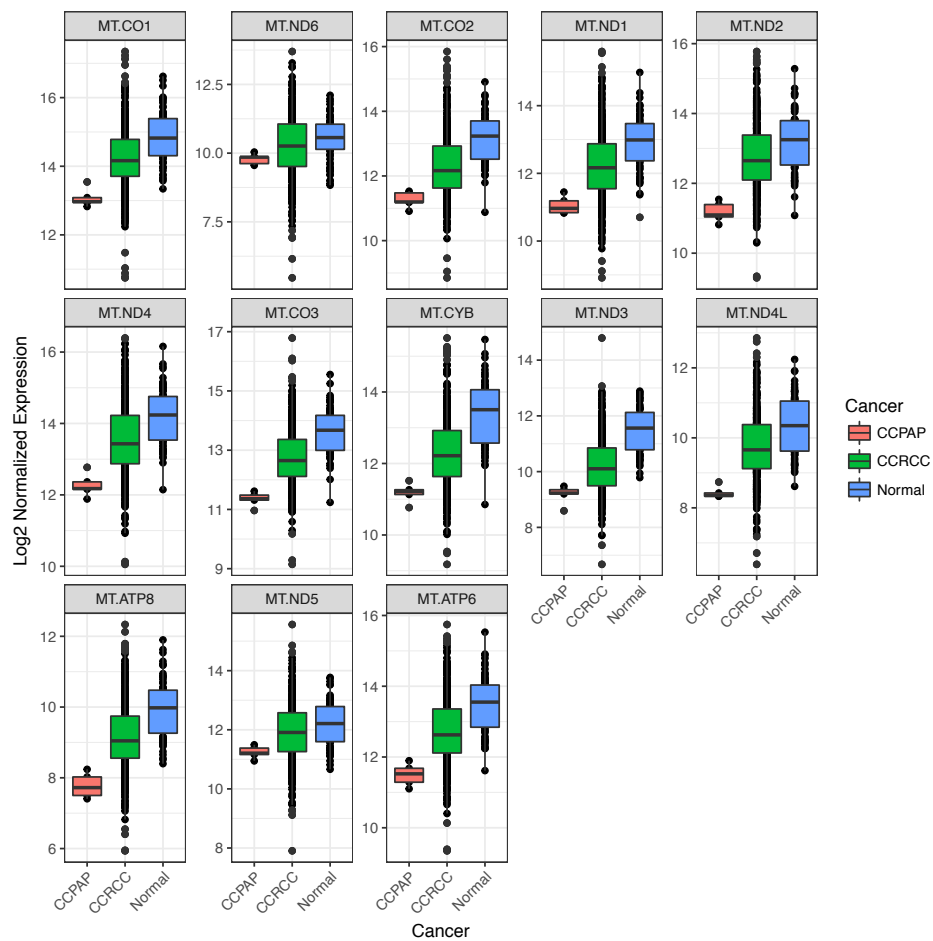

Supplement: supp [file elife-38986-supp-v2.zip]

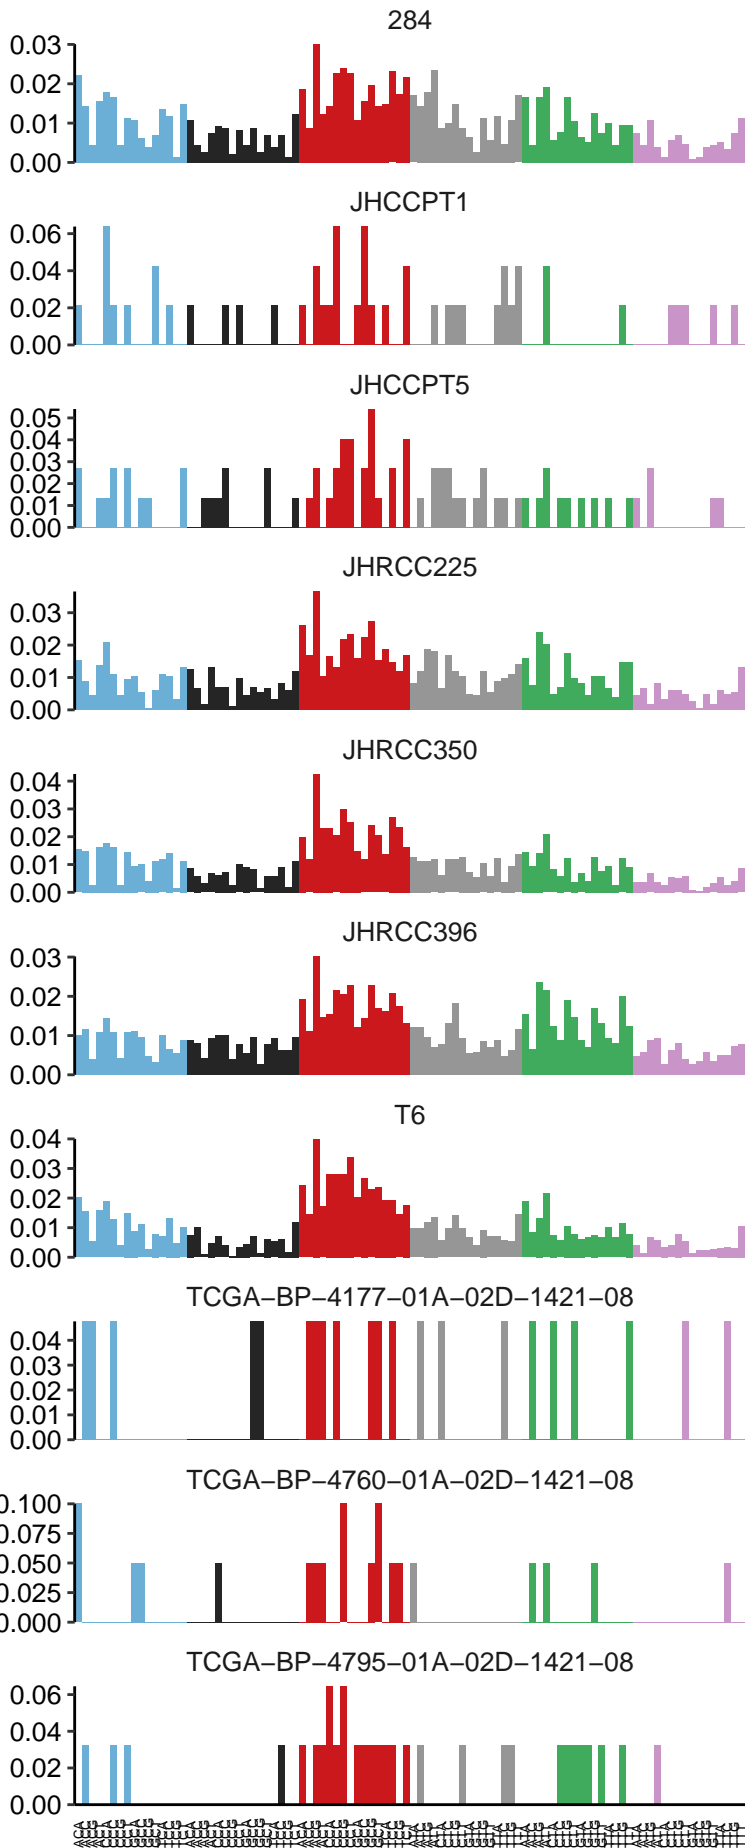

Supplement: supp [file elife-38986-supp-v2.zip]

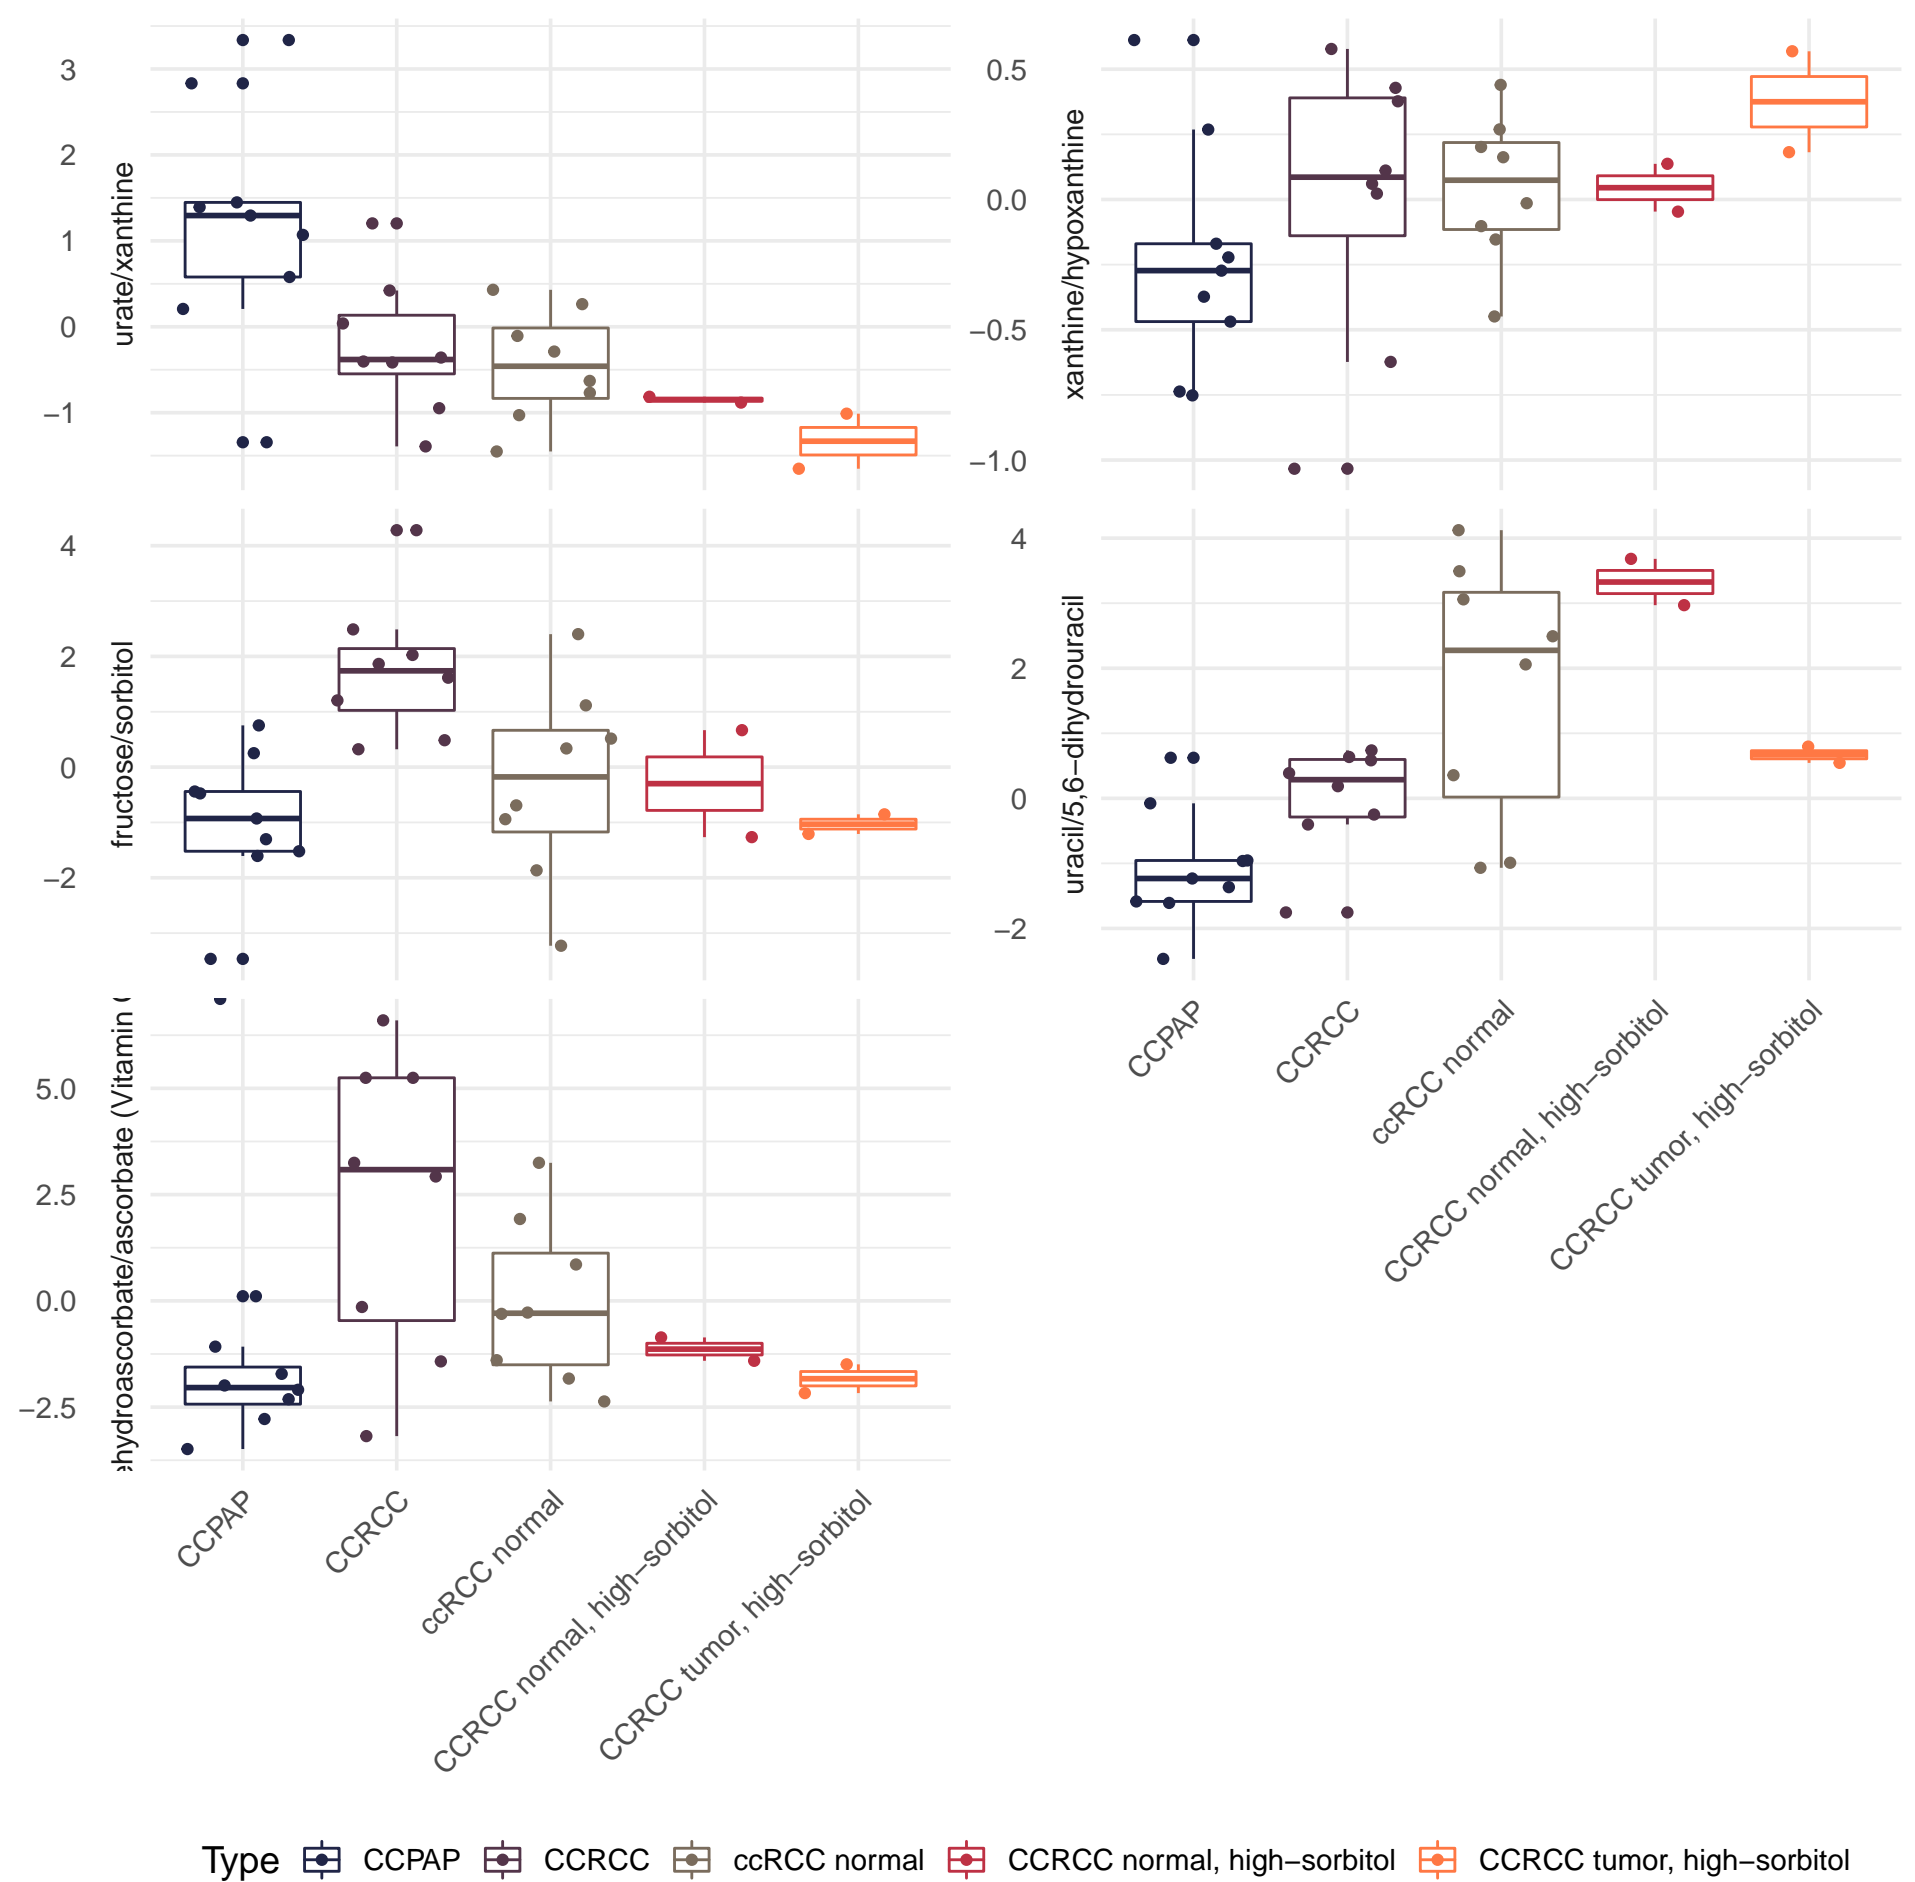

Supplement: supp [file elife-38986-supp-v2.zip]
